# Supplementary material for: Nuclear coat protein drives a multifaceted tolerance program during Turnip crinkle virus infection
Source: Research Square preprint supplement (doi:10.21203/rs.3.rs-8695072/v1), 2026-02-12
Supplement: Supplementary file 1 [file 1134787f94a21fb07fbed197.xlsx]

## Sheet: sid2-2_vs_Col-0
User_ID	symbol	ensembl_ID	sid2Mock-Col0Mock_log2FC	sid2Mock-Col0Mock_adjPval	Direction
AT1G70440	SRO3	AT1G70440	41.785	2e-70	Up
AT5G10140	FLC	AT5G10140	7.0837	0.0308153	Up
AT5G12050	AT5G12050	AT5G12050	2.26803	0.0401576	Up
AT1G10000	AT1G10000	AT1G10000	2.2059	0.0308153	Up
AT5G54148	AT5G54148	AT5G54148	1.99704	0.0350272	Up
AT1G10522	PRIN2	AT1G10522	1.4757	0.0349795	Up
AT4G00230	XSP1	AT4G00230	1.19252	0.0428075	Up
AT1G71260	ATWHY2	AT1G71260	1.18004	0.029237	Up
AT4G25225	AT4G25225	AT4G25225	1.13162	0.0317077	Up
AT1G57770	AT1G57770	AT1G57770	1.10314	0.0382778	Up
AT3G53600	AT3G53600	AT3G53600	-44.7038	6.12e-115	Down
AT5G09530	PELPK1	AT5G09530	-35.9264	1.29e-29	Down
AT2G23270	AT2G23270	AT2G23270	-17.5288	3.41e-14	Down
AT1G13520	AT1G13520	AT1G13520	-17.2572	2.71e-14	Down
AT1G02520	ABCB11	AT1G02520	-16.3077	1.83e-12	Down
AT5G39610	NAC6	AT5G39610	-7.01322	0.00525803	Down
AT1G56600	GolS2	AT1G56600	-6.49074	0.000330906	Down
AT2G29460	GSTU4	AT2G29460	-6.33729	0.0218832	Down
AT3G57240	BG3	AT3G57240	-5.8501	0.0399468	Down
AT4G20110	VSR7	AT4G20110	-5.79381	0.00773633	Down
AT5G46295	AT5G46295	AT5G46295	-5.77775	0.0350272	Down
AT5G53710	AT5G53710	AT5G53710	-5.55422	0.0350272	Down
AT1G02850	BGLU11	AT1G02850	-5.54057	3.86e-05	Down
AT2G05380	GRP3S	AT2G05380	-5.4289	4.33e-13	Down
AT2G15390	FUT4	AT2G15390	-5.37947	0.049598	Down
AT1G13470	AT1G13470	AT1G13470	-5.21965	0.000720416	Down
AT5G40230	UMAMIT37	AT5G40230	-5.03221	0.0489862	Down
AT1G76960	AT1G76960	AT1G76960	-4.64503	0.0085057	Down
AT5G45380	DUR3	AT5G45380	-4.63245	0.000162224	Down
AT5G59320	LTP3	AT5G59320	-4.44078	0.0237135	Down
AT5G06760	LEA4-5	AT5G06760	-4.2626	0.0337735	Down
AT4G30290	XTH19	AT4G30290	-4.20638	0.0011416	Down
AT1G56010	NAC1	AT1G56010	-4.16517	0.0277002	Down
AT3G61280	AT3G61280	AT3G61280	-4.10113	0.00296248	Down
AT3G04720	PR4	AT3G04720	-4.04825	0.0133526	Down
AT3G26210	CYP71B23	AT3G26210	-4.01385	0.0134671	Down
AT5G25250	FLOT1	AT5G25250	-3.95098	0.0177593	Down
AT5G41750	AT5G41750	AT5G41750	-3.90882	0.0133526	Down
AT3G51330	AT3G51330	AT3G51330	-3.73842	0.029237	Down
AT5G48657	AT5G48657	AT5G48657	-3.71655	0.0227197	Down
AT2G37770	ChlAKR	AT2G37770	-3.71459	0.018891	Down
AT2G43570	CHI	AT2G43570	-3.69568	0.029237	Down
AT3G29000	AT3G29000	AT3G29000	-3.69462	0.0428075	Down
AT2G47130	SDR3	AT2G47130	-3.68154	0.029534	Down
AT1G24140	AT1G24140	AT1G24140	-3.68089	0.049598	Down
AT4G03450	AT4G03450	AT4G03450	-3.60187	0.0428075	Down
AT1G10340	AT1G10340	AT1G10340	-3.59811	0.0308153	Down
AT5G61520	AT5G61520	AT5G61520	-3.52407	0.0133526	Down
AT3G48080	AT3G48080	AT3G48080	-3.48603	0.025158	Down
AT3G03341	AT3G03341	AT3G03341	-3.41878	0.0428075	Down
AT4G23610	AT4G23610	AT4G23610	-3.4049	0.0428075	Down
AT5G67340	AT5G67340	AT5G67340	-3.30998	0.0350272	Down
AT4G27410	RD26	AT4G27410	-3.30609	0.0350046	Down
AT2G38790	AT2G38790	AT2G38790	-3.25899	0.0109453	Down
AT3G14620	CYP72A8	AT3G14620	-3.19793	0.000289962	Down
AT5G54610	ANK	AT5G54610	-3.16724	0.0133526	Down
AT1G73805	SARD1	AT1G73805	-3.07975	0.0489862	Down
AT2G32680	RLP23	AT2G32680	-3.06759	0.049598	Down
AT4G14365	XBAT34	AT4G14365	-3.06581	0.0201979	Down
AT5G18360	AT5G18360	AT5G18360	-2.94625	0.0224961	Down
AT1G35710	AT1G35710	AT1G35710	-2.88164	0.0397509	Down
AT3G23120	RLP38	AT3G23120	-2.82558	0.0428075	Down
AT1G69720	HO3	AT1G69720	-2.81286	0.0133526	Down
AT1G13750	AT1G13750	AT1G13750	-2.80518	0.0140464	Down
AT1G31820	PUT1	AT1G31820	-2.79054	0.049598	Down
AT1G80130	AT1G80130	AT1G80130	-2.78999	0.0136565	Down
AT1G04220	KCS2	AT1G04220	-2.78625	0.0158064	Down
AT5G24530	DMR6	AT5G24530	-2.7807	0.012544	Down
AT2G15080	RLP19	AT2G15080	-2.77316	0.0428075	Down
AT4G23220	CRK14	AT4G23220	-2.75824	0.0301004	Down
AT4G02520	GSTF2	AT4G02520	-2.71729	0.0201979	Down
AT1G23840	AT1G23840	AT1G23840	-2.66505	0.0103293	Down
AT2G43150	AT2G43150	AT2G43150	-2.62708	0.000162224	Down
AT5G60900	AT5G60900	AT5G60900	-2.58658	0.012163	Down
AT1G21250	WAK1	AT1G21250	-2.53913	0.0133526	Down
AT5G60950	COBL5	AT5G60950	-2.5342	0.00634199	Down
AT4G14400	ACD6	AT4G14400	-2.5075	0.0123765	Down
AT4G23130	CRK5	AT4G23130	-2.47079	0.028044	Down
AT1G23140	AT1G23140	AT1G23140	-2.44571	0.049598	Down
AT5G05460	ENGase85A	AT5G05460	-2.4255	0.0308153	Down
AT1G73480	AT1G73480	AT1G73480	-2.40484	0.000162224	Down
AT5G38240	AT5G38240	AT5G38240	-2.40072	0.00597777	Down
AT5G20110	AT5G20110	AT5G20110	-2.32009	0.0121136	Down
AT5G07820	AT5G07820	AT5G07820	-2.27192	0.00339029	Down
AT1G63860	AT1G63860	AT1G63860	-2.23538	0.0236518	Down
AT2G46430	CNGC3	AT2G46430	-2.18759	0.0428075	Down
AT3G44400	AT3G44400	AT3G44400	-2.15933	0.0177593	Down
AT3G16770	EBP	AT3G16770	-2.11405	0.0350272	Down
AT3G10020	AT3G10020	AT3G10020	-2.09617	0.000545546	Down
AT1G16110	WAKL6	AT1G16110	-2.08285	0.049598	Down
AT4G08470	MEKK3	AT4G08470	-2.07089	0.000497754	Down
AT1G05570	CALS1	AT1G05570	-2.045	0.0392372	Down
AT1G15790	AT1G15790	AT1G15790	-2.0363	0.0317077	Down
AT5G14780	FDH	AT5G14780	-1.98127	0.0028452	Down
AT4G26090	RPS2 AT4G26090	AT4G26090	-1.87525	0.0489862	Down
AT2G05520	GRP-3	AT2G05520	-1.78508	0.00247585	Down
AT3G55130	ABCG19	AT3G55130	-1.78419	0.0172673	Down
AT4G16670	AT4G16670	AT4G16670	-1.66303	0.0134671	Down
AT4G28150	AT4G28150	AT4G28150	-1.51816	0.049598	Down
AT1G59960	AT1G59960	AT1G59960	-1.33324	0.0428075	Down
AT2G43940	HOL3	AT2G43940	-1.12545	0.0399468	Down
AT3G18370	ATSYTF	AT3G18370	-1.01031	0.0201979	Down

## Sheet: rbohD_vs_Col-0
User_ID	symbol	ensembl_ID	rbohDMock-Col0Mock_log2FC	rbohDMock-Col0Mock_adjPval	Direction
AT1G70440	SRO3	AT1G70440	41.7704	1.04e-68	Up
AT3G07255	AT3G07255	AT3G07255	30.3864	2.43e-13	Up
AT2G33780	AT2G33780	AT2G33780	24.436	0.0365191	Up
AT1G51913	AT1G51913	AT1G51913	15.9976	2.04e-07	Up
AT1G32910	AT1G32910	AT1G32910	11.2354	5.29e-07	Up
AT5G38700	AT5G38700	AT5G38700	10.7613	1.69e-08	Up
AT3G25180	CYP82G1	AT3G25180	9.45358	2.9e-09	Up
AT1G30135	JAZ8	AT1G30135	9.15684	2.08e-16	Up
AT5G40348	AT5G40348	AT5G40348	9.05874	6.38e-05	Up
AT3G27809	AT3G27809	AT3G27809	8.95528	0.000189569	Up
AT2G38240	AT2G38240	AT2G38240	8.73792	7.02e-11	Up
AT4G35655	AT4G35655	AT4G35655	8.42612	9.79e-05	Up
AT2G27690	CYP94C1	AT2G27690	8.22027	1.04e-13	Up
AT2G08950	AT2G08950	AT2G08950	8.09156	0.0313461	Up
AT4G36950	MAPKKK21	AT4G36950	7.78364	2.07e-07	Up
AT5G62360	AT5G62360	AT5G62360	7.78356	2.07e-08	Up
AT2G34600	JAZ7	AT2G34600	7.7407	3.43e-10	Up
AT1G70130	AT1G70130	AT1G70130	7.48823	0.00022685	Up
AT2G22760	AT2G22760	AT2G22760	7.48552	2.88e-05	Up
AT1G76640	AT1G76640	AT1G76640	7.40684	0.000406575	Up
AT4G34410	RRTF1	AT4G34410	7.34746	2.2e-08	Up
AT4G27654	AT4G27654	AT4G27654	7.33754	4.23e-11	Up
AT2G47950	AT2G47950	AT2G47950	7.33064	6e-05	Up
AT5G19110	AT5G19110	AT5G19110	7.28233	1.49e-07	Up
AT4G01380	AT4G01380	AT4G01380	7.23969	0.000407257	Up
AT1G79310	MC7	AT1G79310	7.22559	0.000126508	Up
AT1G43160	RAP2.6	AT1G43160	7.04007	1.15e-06	Up
AT3G22275	AT3G22275	AT3G22275	6.99231	2.44e-07	Up
AT5G59580	UGT76E1	AT5G59580	6.98688	2.61e-07	Up
AT5G64750	ABR1	AT5G64750	6.98334	1.7e-06	Up
AT4G21830	MSRB7	AT4G21830	6.92866	0.00147061	Up
AT5G36907	AT5G36907	AT5G36907	6.92193	0.000839725	Up
AT4G22470	AT4G22470	AT4G22470	6.9026	0.00137965	Up
AT3G05315	AT3G05315	AT3G05315	6.89166	0.0178814	Up
AT5G28237	AT5G28237	AT5G28237	6.87954	3.83e-06	Up
AT4G01390	AT4G01390	AT4G01390	6.87759	0.00317584	Up
AT5G19100	AT5G19100	AT5G19100	6.8338	0.0064183	Up
AT5G62520	SRO5	AT5G62520	6.71784	6.78e-08	Up
AT3G53600	AT3G53600	AT3G53600	6.71352	0.000220974	Up
AT2G17660	AT2G17660	AT2G17660	6.70206	1.07e-08	Up
AT3G50260	CEJ1	AT3G50260	6.66454	1.84e-07	Up
AT2G44578	AT2G44578	AT2G44578	6.65608	3.66e-10	Up
AT5G63450	CYP94B1	AT5G63450	6.61578	7.32e-06	Up
AT4G25100	FSD1	AT4G25100	6.61301	1.31e-06	Up
AT4G24110	AT4G24110	AT4G24110	6.59861	9.02e-06	Up
AT3G23250	MYB15	AT3G23250	6.59364	1.04e-07	Up
AT3G11480	BSMT1	AT3G11480	6.56989	3.91e-07	Up
AT5G43650	BHLH92	AT5G43650	6.55715	0.0125643	Up
AT1G19320	AT1G19320	AT1G19320	6.47393	0.000803056	Up
AT1G53903	AT1G53903 AT1G53903	AT1G53903	6.46783	6.03e-13	Up
AT1G53885	AT1G53903 AT1G53885	AT1G53885	6.46763	6.06e-13	Up
AT4G36010	AT4G36010	AT4G36010	6.42425	5.51e-16	Up
AT1G16370	OCT6	AT1G16370	6.39651	2.07e-13	Up
AT3G27415	AT3G27415	AT3G27415	6.34222	6.29e-05	Up
AT4G31800	WRKY18	AT4G31800	6.32127	4.68e-10	Up
AT4G11911	AT4G11911	AT4G11911	6.30349	3.01e-06	Up
AT5G12340	AT5G12340	AT5G12340	6.29389	0.000261278	Up
AT5G13220	JAZ10	AT5G13220	6.20763	1.56e-10	Up
AT1G12610	DDF1	AT1G12610	6.17239	1.02e-05	Up
AT4G20190	AT4G20190	AT4G20190	6.16683	0.0314951	Up
AT2G30830	AT2G30830	AT2G30830	6.14514	0.000121308	Up
AT5G24780	VSP1	AT5G24780	6.07999	2.64e-08	Up
AT3G48520	CYP94B3	AT3G48520	6.0769	1.18e-05	Up
AT1G25422	AT1G25422	AT1G25422	6.03656	1.78e-06	Up
AT4G11320	AT4G11320	AT4G11320	5.96788	1.39e-05	Up
AT1G75960	AT1G75960	AT1G75960	5.93727	1.34e-14	Up
AT2G06050	OPR3	AT2G06050	5.88267	1.45e-15	Up
AT5G59510	RTFL5	AT5G59510	5.87665	5.84e-10	Up
AT2G14290	AT2G14290	AT2G14290	5.86772	0.00019442	Up
AT3G07045	AT3G07045	AT3G07045	5.86356	3.91e-07	Up
AT3G59620	AT3G59620	AT3G59620	5.8597	0.0215351	Up
AT5G56880	AT5G56880	AT5G56880	5.82042	0.000652097	Up
AT4G16740	TPS03	AT4G16740	5.8149	0.00850743	Up
ATCG00060	ATCG00060	ATCG00060	5.79253	0.0011425	Up
AT1G09950	RAS1	AT1G09950	5.78462	4.41e-09	Up
AT5G05600	AT5G05600	AT5G05600	5.78096	1.3e-10	Up
AT5G03204	AT5G03204	AT5G03204	5.77505	0.000100261	Up
AT2G17840	ERD7	AT2G17840	5.74188	3.48e-14	Up
AT3G28600	AT3G28600	AT3G28600	5.73932	0.00159584	Up
AT1G17380	JAZ5	AT1G17380	5.69668	5.56e-10	Up
AT1G61120	TPS04	AT1G61120	5.69222	0.000823022	Up
AT1G57850	AT1G57850	AT1G57850	5.67186	0.0130657	Up
AT5G35110	AT5G35110	AT5G35110	5.64266	0.000528757	Up
AT3G48450	AT3G48450	AT3G48450	5.62875	9.48e-07	Up
ATCG00690	psbT	ATCG00690	5.62768	1.45e-15	Up
AT1G19210	AT1G19210	AT1G19210	5.62394	0.00500034	Up
AT3G51450	AT3G51450	AT3G51450	5.62258	9.7e-15	Up
AT4G33467	AT4G33467	AT4G33467	5.60865	0.0213972	Up
AT5G65300	AT5G65300	AT5G65300	5.58695	5.36e-07	Up
AT3G25780	AOC3	AT3G25780	5.5701	8.77e-09	Up
AT1G17420	LOX3	AT1G17420	5.56664	3.04e-10	Up
AT1G47130	AT1G47130	AT1G47130	5.5456	0.0126525	Up
AT1G72416	AT1G72416	AT1G72416	5.53922	1.14e-08	Up
AT4G21213	AT4G21213	AT4G21213	5.5294	6.21e-11	Up
AT5G17490	RGL3	AT5G17490	5.52659	5.71e-12	Up
ATCG00630	psaJ	ATCG00630	5.52561	8.66e-22	Up
AT1G04907	U1.10	AT1G04907	5.52542	0.00044128	Up
AT5G52020	AT5G52020	AT5G52020	5.51548	0.00448688	Up
AT3G06490	MYB108	AT3G06490	5.50126	0.000652731	Up
AT2G24210	TPS10 AT2G24210	AT2G24210	5.48498	1.28e-09	Up
AT5G59490	AT5G59490	AT5G59490	5.4814	0.00619751	Up
AT5G38120	4CL8	AT5G38120	5.47666	4.85e-08	Up
AT5G53290	CRF3	AT5G53290	5.46725	7.58e-10	Up
AT2G32130	AT2G32130	AT2G32130	5.41965	0.000839725	Up
AT3G43250	AT3G43250	AT3G43250	5.40355	0.00509856	Up
AT1G28480	GRX480	AT1G28480	5.36026	0.000582369	Up
AT2G45940	AT2G45940	AT2G45940	5.35876	1.3e-05	Up
AT3G62760	ATGSTF13	AT3G62760	5.34315	0.00995077	Up
AT1G44350	ILL6	AT1G44350	5.33317	1.01e-12	Up
AT5G41590	AT5G41590	AT5G41590	5.31995	0.0307507	Up
AT5G56980	AT5G56980	AT5G56980	5.31972	1.4e-14	Up
AT1G61610	AT1G61610	AT1G61610	5.30505	5.96e-09	Up
AT5G07745	AT5G07745	AT5G07745	5.25931	0.00207266	Up
AT2G18196	AT2G18196	AT2G18196	5.24709	0.00336352	Up
AT4G10390	AT4G10390	AT4G10390	5.23214	7.94e-11	Up
AT4G15200	FH3	AT4G15200	5.22632	8.75e-05	Up
AT1G52720	AT1G52720	AT1G52720	5.19708	3.17e-24	Up
AT1G77520	AT1G77520	AT1G77520	5.19118	0.00278645	Up
AT4G01360	BPS3	AT4G01360	5.1699	4.42e-05	Up
AT5G10140	FLC	AT5G10140	5.16242	0.0366265	Up
AT2G34930	AT2G34930	AT2G34930	5.13814	1.26e-10	Up
AT1G54020	AT1G54020	AT1G54020	5.13103	0.000262744	Up
AT1G51780	ILL5	AT1G51780	5.12584	0.000687325	Up
AT5G53750	AT5G53750	AT5G53750	5.12275	3.46e-17	Up
AT5G24290	MEB2	AT5G24290	5.1153	4.9e-05	Up
AT5G43170	ZF3	AT5G43170	5.09188	2.64e-08	Up
AT3G16860	COBL8	AT3G16860	5.08334	1.26e-10	Up
AT3G25760	AOC1	AT3G25760	5.06687	4.35e-07	Up
AT2G42760	AT2G42760	AT2G42760	5.0344	4.95e-12	Up
AT1G28040	AT1G28040	AT1G28040	5.02671	0.00874794	Up
AT2G22770	NAI1	AT2G22770	5.01233	8.57e-07	Up
AT1G22570	AT1G22570	AT1G22570	4.97712	1.18e-05	Up
AT2G22880	AT2G22880	AT2G22880	4.95681	1.18e-05	Up
AT5G27520	PNC2	AT5G27520	4.95474	4.96e-17	Up
AT2G29440	GSTU6	AT2G29440	4.93597	1.07e-10	Up
AT2G32140	AT2G32140	AT2G32140	4.93215	6.99e-06	Up
AT2G25460	AT2G25460	AT2G25460	4.92505	3.36e-05	Up
AT1G74430	MYB95	AT1G74430	4.92292	4.09e-10	Up
AT5G15960	KIN1	AT5G15960	4.91531	1.14e-05	Up
AT5G01380	AT5G01380	AT5G01380	4.87685	0.000925899	Up
AT1G06620	AT1G06620	AT1G06620	4.87313	3.67e-08	Up
AT3G23550	AT3G23550	AT3G23550	4.86072	0.00145602	Up
AT1G19180	JAZ1	AT1G19180	4.84589	6.16e-08	Up
AT5G52120	PP2-A14	AT5G52120	4.84013	9.17e-11	Up
AT1G03743	AT1G03743	AT1G03743	4.83036	0.0267027	Up
AT3G02140	TMAC2	AT3G02140	4.82573	3.4e-08	Up
AT2G39518	AT2G39518	AT2G39518	4.82428	0.0206882	Up
AT2G20825	ULT2	AT2G20825	4.82154	0.0446535	Up
AT1G06002	AT1G06002	AT1G06002	4.81232	1.54e-20	Up
AT2G32510	MAPKKK17	AT2G32510	4.80406	8.26e-06	Up
AT1G11960	AT1G11960	AT1G11960	4.79771	6.01e-18	Up
AT5G10300	MES5	AT5G10300	4.77884	9.4e-13	Up
AT5G09495	AT5G09495	AT5G09495	4.76147	0.00837177	Up
AT2G45930	AT2G45930	AT2G45930	4.75635	0.000177391	Up
AT3G10300	AT3G10300	AT3G10300	4.75552	8.18e-23	Up
AT5G22545	AT5G22545	AT5G22545	4.74858	0.000755031	Up
AT3G46700	AT3G46700	AT3G46700	4.73624	0.00405201	Up
AT4G29930	AT4G29930	AT4G29930	4.73589	0.000298171	Up
ATCG01180	ATCG01180	ATCG01180	4.73566	1.01e-12	Up
ATCG00950	ATCG00950	ATCG00950	4.73547	1.01e-12	Up
AT2G21510	AT2G21510	AT2G21510	4.72777	0.00919148	Up
AT4G12050	AT4G12050	AT4G12050	4.70322	0.00885421	Up
AT5G41120	AT5G41120	AT5G41120	4.6932	2.72e-13	Up
AT1G15010	AT1G15010	AT1G15010	4.68867	2.64e-08	Up
AT1G61890	AT1G61890	AT1G61890	4.64902	9e-14	Up
AT1G72520	LOX4	AT1G72520	4.63768	4.89e-05	Up
AT5G47240	NUDT8	AT5G47240	4.6237	2.44e-08	Up
AT4G17470	AT4G17470	AT4G17470	4.61327	1.3e-07	Up
AT2G30360	SIP4	AT2G30360	4.59814	1.2e-12	Up
AT5G67210	IRX15-L	AT5G67210	4.58359	1.24e-10	Up
AT3G27510	AT3G27510	AT3G27510	4.58186	0.0108104	Up
AT2G40330	PYL6	AT2G40330	4.5797	0.00011176	Up
AT1G18710	MYB47	AT1G18710	4.57726	5.67e-07	Up
AT1G28050	BBX13	AT1G28050	4.57314	4.26e-09	Up
AT4G09135	U6.6	AT4G09135	4.57126	0.0168591	Up
AT2G44840	ERF13	AT2G44840	4.5653	0.000221473	Up
AT5G21960	AT5G21960	AT5G21960	4.56266	0.00060896	Up
AT4G28556	RIC7 AT4G28556	AT4G28556	4.56034	0.0122695	Up
AT1G11670	AT1G11670	AT1G11670	4.56016	1.27e-13	Up
AT3G01830	AT3G01830	AT3G01830	4.55971	0.00208538	Up
AT3G50280	AT3G50280	AT3G50280	4.53794	1.55e-05	Up
AT4G02360	AT4G02360	AT4G02360	4.53184	2.82e-08	Up
AT1G64195	AT1G64195	AT1G64195	4.5109	0.0248655	Up
AT1G07887	AT1G07887	AT1G07887	4.49584	0.00740671	Up
AT1G54095	AT1G54095	AT1G54095	4.49498	0.0357572	Up
AT2G01430	HB17	AT2G01430	4.49078	0.0146803	Up
AT4G08170	AT4G08170	AT4G08170	4.48727	7.83e-20	Up
AT5G65280	GCL1	AT5G65280	4.48538	1.12e-14	Up
AT1G05420	OFP12	AT1G05420	4.48463	0.000150685	Up
AT5G67310	CYP81G1	AT5G67310	4.47867	0.0204189	Up
AT1G11185	AT1G11185	AT1G11185	4.46994	3.3e-05	Up
AT3G02795	AT3G02795	AT3G02795	4.46895	0.0185794	Up
AT1G65390	PP2-A5	AT1G65390	4.46105	0.00406819	Up
ATCG00320	ATCG00320	ATCG00320	4.45349	1.1e-05	Up
AT1G51760	IAR3	AT1G51760	4.441	9.07e-15	Up
AT1G70640	AT1G70640	AT1G70640	4.42549	0.00125203	Up
AT5G06115	AT5G06115	AT5G06115	4.42166	0.0200284	Up
AT5G38710	AT5G38710	AT5G38710	4.42016	0.000187168	Up
AT1G04263	U5.6	AT1G04263	4.41741	0.000237705	Up
AT2G32150	AT2G32150	AT2G32150	4.40283	1.26e-09	Up
AT1G74420	FUT3	AT1G74420	4.38976	0.00323765	Up
AT3G20760	AT3G20760	AT3G20760	4.3836	2.56e-06	Up
AT3G51660	AT3G51660	AT3G51660	4.37667	5.97e-09	Up
AT1G19565	AT1G19565	AT1G19565	4.37503	0.00944235	Up
AT1G74950	TIFY10B	AT1G74950	4.37312	2.72e-13	Up
AT3G55970	JRG21	AT3G55970	4.36496	8.94e-05	Up
AT2G24850	TAT3	AT2G24850	4.36057	7.72e-05	Up
AT4G13820	AT4G13820	AT4G13820	4.3518	0.0210632	Up
AT1G76650	CML38	AT1G76650	4.34921	0.000151721	Up
AT4G28085	AT4G28085	AT4G28085	4.34516	0.000357322	Up
AT5G58180	ATYKT62	AT5G58180	4.33097	0.0277422	Up
AT1G02400	GA2OX6	AT1G02400	4.32595	4.79e-05	Up
AT5G19230	AT5G19230	AT5G19230	4.32282	6.16e-07	Up
AT4G10290	AT4G10290	AT4G10290	4.31409	0.0197595	Up
AT1G51770	AT1G51770	AT1G51770	4.30832	0.0028017	Up
AT5G02325	AT5G02325	AT5G02325	4.29005	0.00451118	Up
AT5G58680	AT5G58680	AT5G58680	4.28215	0.00645835	Up
AT4G13860	AT4G13860	AT4G13860	4.27878	0.000368469	Up
AT5G24770	VSP2	AT5G24770	4.27631	1.83e-06	Up
AT3G25770	AOC2	AT3G25770	4.27594	3.66e-10	Up
AT2G46370	JAR1	AT2G46370	4.27112	9.18e-17	Up
AT5G22630	ADT5	AT5G22630	4.26526	6.18e-10	Up
AT1G80120	AT1G80120	AT1G80120	4.26448	5.89e-12	Up
AT5G05340	PRX52	AT5G05340	4.24272	0.0359534	Up
AT4G36900	RAP2.10	AT4G36900	4.22072	1.72e-14	Up
AT1G69930	GSTU11	AT1G69930	4.21496	0.0289674	Up
AT3G53232	RTFL1	AT3G53232	4.20499	5.61e-10	Up
AT1G06463	AT1G06463	AT1G06463	4.19919	9.2e-06	Up
AT3G54020	AtIPCS1	AT3G54020	4.18417	1.4e-26	Up
AT4G37700	AT4G37700	AT4G37700	4.18365	0.022155	Up
AT1G61340	FBS1	AT1G61340	4.17966	1.55e-05	Up
AT2G22860	PSK2	AT2G22860	4.17568	2.23e-07	Up
AT3G05055	AT3G05055	AT3G05055	4.16636	0.000107835	Up
AT4G18010	IP5PII	AT4G18010	4.15567	1.48e-15	Up
AT4G35985	AT4G35985	AT4G35985	4.14526	2.94e-11	Up
AT3G25730	EDF3	AT3G25730	4.13803	6.09e-06	Up
AT3G15200	AT3G15200	AT3G15200	4.13507	0.0202529	Up
AT2G28650	EXO70H8	AT2G28650	4.11453	4.71e-05	Up
AT1G75450	CKX5	AT1G75450	4.10508	1.36e-12	Up
AT5G47220	ERF2	AT5G47220	4.10079	0.000324012	Up
AT5G08490	SLG1	AT5G08490	4.09313	0.0368042	Up
AT4G17500	ERF-1	AT4G17500	4.09156	0.00069142	Up
AT2G38250	AT2G38250	AT2G38250	4.09047	0.00315533	Up
AT2G35290	AT2G35290	AT2G35290	4.08389	3.21e-07	Up
AT3G27210	AT3G27210	AT3G27210	4.0828	5.79e-07	Up
AT5G52882	AT5G52882	AT5G52882	4.08093	1.12e-14	Up
AT2G23340	DEAR3	AT2G23340	4.07109	1.15e-15	Up
AT1G51820	AT1G51820	AT1G51820	4.06764	0.00124378	Up
AT2G07659	AT2G07659	AT2G07659	4.05337	0.0209773	Up
AT1G52890	NAC019	AT1G52890	4.0255	0.000126806	Up
AT5G02675	AT5G02675	AT5G02675	4.01368	0.0274143	Up
AT5G05440	PYL5	AT5G05440	4.01157	3.44e-06	Up
AT2G15760	AT2G15760	AT2G15760	4.0017	6.2e-08	Up
AT3G06500	A/N-InvC	AT3G06500	3.96777	4.35e-07	Up
AT3G28740	CYP81D11	AT3G28740	3.96424	0.0441243	Up
AT1G20510	OPCL1	AT1G20510	3.95643	9.41e-08	Up
AT2G33460	RIC1	AT2G33460	3.94845	0.0278891	Up
AT5G55090	MAPKKK15	AT5G55090	3.94678	0.000235541	Up
AT1G72210	AT1G72210	AT1G72210	3.94108	1.63e-07	Up
AT4G17230	SCL13	AT4G17230	3.93932	2.58e-08	Up
AT1G68350	AT1G68350	AT1G68350	3.92268	1.26e-05	Up
AT5G56985	AT5G56985	AT5G56985	3.91371	0.01301	Up
AT1G80840	WRKY40	AT1G80840	3.88998	0.00136671	Up
AT5G04370	NAMT1	AT5G04370	3.88766	0.0482019	Up
AT1G73325	AT1G73325	AT1G73325	3.88647	2.83e-05	Up
AT2G07758	AT2G07758	AT2G07758	3.88316	0.0462548	Up
ATMG00250	ATMG00250	ATMG00250	3.88316	0.0462548	Up
AT4G18980	AtS40-3	AT4G18980	3.8758	0.00713717	Up
AT5G54170	AT5G54170	AT5G54170	3.87381	7.48e-12	Up
AT4G27652	AT4G27652	AT4G27652	3.86902	1.07e-06	Up
AT3G44860	FAMT	AT3G44860	3.86517	0.000618953	Up
AT4G29740	CKX4	AT4G29740	3.85745	1.04e-06	Up
AT4G21870	AT4G21870	AT4G21870	3.85715	1.6e-05	Up
AT2G23120	AT2G23120	AT2G23120	3.84503	5.42e-16	Up
AT4G29700	AT4G29700	AT4G29700	3.8425	1.27e-06	Up
AT2G27310	AT2G27310	AT2G27310	3.83779	1.08e-05	Up
AT4G15210	BAM5	AT4G15210	3.81866	0.000112685	Up
AT2G38310	PYL4	AT2G38310	3.81599	1.13e-09	Up
ATCG00370	ATCG00370	ATCG00370	3.80476	0.00342159	Up
AT4G11140	CRF1	AT4G11140	3.80263	0.000350587	Up
AT5G43890	YUC5	AT5G43890	3.79315	0.0167708	Up
AT2G47140	SDR5	AT2G47140	3.79005	0.0235082	Up
AT1G51090	AT1G51090	AT1G51090	3.77319	6.28e-06	Up
AT1G54010	AT1G54010	AT1G54010	3.77281	1.84e-05	Up
AT1G20450	ERD10	AT1G20450	3.77206	1.27e-11	Up
AT4G24340	AT4G24340	AT4G24340	3.77125	0.00513487	Up
AT5G66650	AT5G66650	AT5G66650	3.76437	7.07e-06	Up
AT5G61800	AT5G61800	AT5G61800	3.75687	0.00144471	Up
AT4G39320	AT4G39320	AT4G39320	3.75491	6.52e-05	Up
AT4G07120	U1.2	AT4G07120	3.75121	0.0413998	Up
AT3G46900	COPT2	AT3G46900	3.72932	0.018948	Up
AT1G76790	IGMT5	AT1G76790	3.72705	0.00117373	Up
AT2G22080	AT2G22080	AT2G22080	3.71518	2.37e-13	Up
AT4G22620	AT4G22620	AT4G22620	3.70883	1.92e-05	Up
AT2G37580	AT2G37580	AT2G37580	3.6993	2.74e-14	Up
AT4G27950	CRF4	AT4G27950	3.67787	0.00311282	Up
AT1G56660	AT1G56660	AT1G56660	3.67759	1.06e-07	Up
AT4G31110	AT4G31110	AT4G31110	3.67457	0.00930305	Up
AT1G08113	AT1G08113	AT1G08113	3.66912	0.0258104	Up
AT1G51800	IOS1	AT1G51800	3.65943	0.00210765	Up
ATCG00870	ycf15-A ATCG00870	ATCG00870	3.64195	2.19e-05	Up
AT4G25433	AT4G25433	AT4G25433	3.63589	0.00135018	Up
AT2G30766	AT2G30766	AT2G30766	3.62239	0.0461096	Up
AT5G49520	WRKY48	AT5G49520	3.61877	0.000252137	Up
AT4G35480	RHA3B	AT4G35480	3.61267	5.93e-05	Up
AT4G22780	ACR7	AT4G22780	3.61086	2.32e-08	Up
ATCG01270	ycf15-A ATCG01270	ATCG01270	3.60984	2.67e-05	Up
AT1G72450	JAZ6	AT1G72450	3.59469	1.48e-09	Up
AT5G42650	AOS	AT5G42650	3.59355	1.37e-07	Up
AT1G01030	NGA3	AT1G01030	3.58805	1.92e-09	Up
AT1G14130	AT1G14130	AT1G14130	3.58528	7.46e-12	Up
AT1G56300	AT1G56300	AT1G56300	3.57965	9.97e-05	Up
ATCG00310	ATCG00310	ATCG00310	3.57739	2.69e-14	Up
AT4G12410	AT4G12410	AT4G12410	3.57578	0.000610321	Up
AT5G64870	AT5G64870	AT5G64870	3.57291	0.000144156	Up
AT3G46650	AT3G46650	AT3G46650	3.56741	1.1e-07	Up
AT3G58620	TTL4	AT3G58620	3.56398	1.66e-14	Up
AT1G32640	MYC2	AT1G32640	3.55789	5.31e-10	Up
AT1G68290	ENDO2	AT1G68290	3.5566	0.0328215	Up
AT1G53625	AT1G53625	AT1G53625	3.55386	0.0431767	Up
AT2G25625	AT2G25625	AT2G25625	3.55246	0.0419722	Up
AT1G20515	AT1G20515	AT1G20515	3.5406	4.47e-06	Up
AT1G52400	BGLU18	AT1G52400	3.52305	9.82e-05	Up
AT3G12145	FLR1	AT3G12145	3.51795	3.9e-05	Up
AT2G36380	ABCG34	AT2G36380	3.50903	3.44e-11	Up
AT1G58200	MSL3	AT1G58200	3.5059	2.06e-20	Up
AT5G44350	AT5G44350	AT5G44350	3.50473	0.000619099	Up
AT5G09440	EXL4 AT5G09440	AT5G09440	3.50435	0.000185608	Up
AT5G15022	AT5G15022	AT5G15022	3.49993	0.00264564	Up
AT5G03210	DIP2	AT5G03210	3.49472	0.0097926	Up
AT4G13395	RTFL12	AT4G13395	3.4857	0.00280518	Up
AT5G60890	MYB34	AT5G60890	3.48263	3.54e-11	Up
AT4G29610	AT4G29610	AT4G29610	3.46854	0.000603657	Up
ATCG00390	ATCG00390	ATCG00390	3.46419	6.95e-05	Up
AT1G73550	AT1G73550	AT1G73550	3.46174	0.034988	Up
AT1G29330	ERD2 AT1G29330	AT1G29330	3.46053	1.97e-14	Up
AT2G32200	AT2G32200	AT2G32200	3.44885	0.000232247	Up
AT5G41315	GL3	AT5G41315	3.44843	6.81e-05	Up
AT3G16690	SWEET16	AT3G16690	3.44686	7.34e-10	Up
AT2G42540	COR15A	AT2G42540	3.44376	2.06e-06	Up
AT5G41080	GDPD2	AT5G41080	3.44169	0.00881877	Up
ATCG00760	rpl36	ATCG00760	3.43997	5.76e-09	Up
AT1G45145	TRX5	AT1G45145	3.43171	1.28e-05	Up
AT2G15960	AT2G15960	AT2G15960	3.42753	8.53e-07	Up
AT4G20860	AT4G20860	AT4G20860	3.42204	0.000200825	Up
AT4G21850	MSRB9	AT4G21850	3.4204	0.00266094	Up
AT1G20030	AT1G20030	AT1G20030	3.40876	3.62e-06	Up
AT3G47960	GTR1	AT3G47960	3.40122	2.12e-15	Up
AT2G45680	TCP9	AT2G45680	3.40052	8.28e-18	Up
AT5G46590	NAC096	AT5G46590	3.38912	0.000211753	Up
AT1G80820	CCR2 AT1G80820	AT1G80820	3.3888	0.00413684	Up
AT3G50120	AT3G50120	AT3G50120	3.38057	0.00619029	Up
AT4G21865	AT4G21865	AT4G21865	3.37671	6.02e-16	Up
AT2G40230	AT2G40230	AT2G40230	3.36559	1.58e-11	Up
AT5G38130	AT5G38130	AT5G38130	3.35497	0.00172846	Up
AT5G62865	AT5G62865	AT5G62865	3.34807	6.9e-08	Up
AT5G01760	AT5G01760	AT5G01760	3.34675	0.0464105	Up
AT5G01505	AT5G01505	AT5G01505	3.34487	0.0448999	Up
AT1G11210	AT1G11210	AT1G11210	3.34392	0.00572133	Up
AT4G01575	AT4G01575	AT4G01575	3.3359	4.11e-05	Up
AT5G17350	AT5G17350	AT5G17350	3.33307	0.00697038	Up
AT3G28300	AT14A AT3G28300	AT3G28300	3.33036	0.0230251	Up
AT3G28290	AT14A AT3G28290	AT3G28290	3.33036	0.0230251	Up
AT1G66760	AT1G66760	AT1G66760	3.32631	0.000120176	Up
AT2G22330	CYP79B3	AT2G22330	3.31858	4.45e-07	Up
AT3G50620	AT3G50620	AT3G50620	3.31531	8.67e-16	Up
AT3G50970	LTI30	AT3G50970	3.31233	0.00195058	Up
AT3G59750	AT3G59750	AT3G59750	3.31198	0.0444962	Up
AT1G70700	TIFY7	AT1G70700	3.30741	3.99e-09	Up
AT1G36622	AT1G36622	AT1G36622	3.30175	0.0254842	Up
AT3G04010	AT3G04010	AT3G04010	3.2909	0.000829638	Up
ATCG01070	ndhE	ATCG01070	3.28748	5.53e-13	Up
AT5G35735	AT5G35735	AT5G35735	3.28007	0.000283738	Up
AT4G00305	AT4G00305	AT4G00305	3.26733	0.0159692	Up
AT4G17615	CBL1	AT4G17615	3.26561	5.34e-09	Up
AT1G76580	AT1G76580	AT1G76580	3.26184	2.43e-10	Up
AT3G07320	AT3G07320	AT3G07320	3.25832	0.00050313	Up
AT5G06845	AT5G06845	AT5G06845	3.25735	1.28e-07	Up
AT5G17850	AT5G17850	AT5G17850	3.25634	2.32e-06	Up
AT5G40460	AT5G40460	AT5G40460	3.25528	7.06e-05	Up
AT1G62975	AT1G62975	AT1G62975	3.25486	0.000502038	Up
AT1G75230	AT1G75230	AT1G75230	3.24278	1.14e-19	Up
AT5G06825	AT5G06825	AT5G06825	3.24272	0.00645831	Up
AT1G05020	AT1G05020	AT1G05020	3.23359	0.000262383	Up
AT2G36590	ProT3	AT2G36590	3.23297	2.9e-05	Up
AT1G32920	AT1G32920	AT1G32920	3.23223	0.000806518	Up
AT3G59350	AT3G59350	AT3G59350	3.2314	2.15e-07	Up
AT2G38750	ANNAT4	AT2G38750	3.2309	1.67e-06	Up
AT1G18200	RABA6b	AT1G18200	3.23029	0.000694833	Up
AT4G16590	CSLA01	AT4G16590	3.21939	0.0068144	Up
AT1G18210	AT1G18210	AT1G18210	3.21488	1.45e-15	Up
AT5G52410	AT5G52410	AT5G52410	3.2136	1.24e-14	Up
AT2G43550	AT2G43550	AT2G43550	3.20077	3.62e-07	Up
AT3G57460	AT3G57460	AT3G57460	3.19884	0.0032169	Up
AT1G73080	PEPR1	AT1G73080	3.19813	2.4e-06	Up
ATCG01120	rps15	ATCG01120	3.19628	3.48e-14	Up
AT4G06305	AT4G06305	AT4G06305	3.18223	2.9e-06	Up
AT4G37770	ACS8	AT4G37770	3.17947	0.0153984	Up
AT3G60490	AT3G60490	AT3G60490	3.17768	0.000248368	Up
AT5G10695	AT5G10695	AT5G10695	3.17081	0.000127637	Up
AT3G14870	AT3G14870	AT3G14870	3.16909	7.04e-05	Up
AT2G43535	AT2G43535	AT2G43535	3.16892	4.74e-09	Up
AT4G06795	AT4G06795	AT4G06795	3.16855	6.05e-05	Up
AT3G57450	AT3G57450	AT3G57450	3.16827	1.12e-06	Up
AT5G03270	LOG6	AT5G03270	3.16335	0.000633482	Up
AT1G19670	CLH1	AT1G19670	3.15716	7.1e-06	Up
AT5G45750	RABA1c	AT5G45750	3.15677	3.47e-19	Up
AT4G30650	AT4G30650	AT4G30650	3.15639	0.000259671	Up
AT4G17480	AT4G17480	AT4G17480	3.15009	0.0346818	Up
AT1G06537	AT1G06537	AT1G06537	3.14515	7.1e-10	Up
AT3G61190	BAP1	AT3G61190	3.14343	0.00492034	Up
AT4G34710	ADC2	AT4G34710	3.1401	7.24e-07	Up
AT3G54990	SMZ	AT3G54990	3.13992	0.0353214	Up
ATCG01160	ATCG01160	ATCG01160	3.13265	3.2e-08	Up
AT4G21570	AT4G21570	AT4G21570	3.13254	1.3e-11	Up
ATCG00970	ATCG00970	ATCG00970	3.13232	3.22e-08	Up
AT5G64572	AT5G64572	AT5G64572	3.12991	2.23e-05	Up
AT1G74450	AT1G74450	AT1G74450	3.12647	9.14e-06	Up
AT4G30660	AT4G30660	AT4G30660	3.1142	1.68e-11	Up
AT2G39420	AT2G39420	AT2G39420	3.11283	7.16e-08	Up
AT2G30040	MAPKKK14	AT2G30040	3.11158	0.00022056	Up
AT5G16190	CSLA11	AT5G16190	3.11055	8.39e-06	Up
AT3G19970	AT3G19970	AT3G19970	3.10765	0.000178811	Up
ATCG00420	ndhJ	ATCG00420	3.10678	2.16e-08	Up
ATCG00590	petL	ATCG00590	3.1033	5.01e-07	Up
AT1G14260	AT1G14260	AT1G14260	3.10202	0.00406121	Up
AT3G16470	JR1	AT3G16470	3.09835	4.82e-07	Up
AT5G54300	AT5G54300	AT5G54300	3.0923	1.83e-07	Up
AT5G24380	YSL2	AT5G24380	3.0918	0.0106854	Up
AT4G24350	AT4G24350	AT4G24350	3.08632	9.9e-08	Up
AT4G32800	AT4G32800	AT4G32800	3.08416	6.16e-07	Up
AT4G33985	AT4G33985	AT4G33985	3.08143	5.29e-07	Up
AT2G46510	AIB	AT2G46510	3.07094	3.17e-12	Up
AT5G53760	MLO11	AT5G53760	3.06956	2.52e-11	Up
AT2G46240	BAG6	AT2G46240	3.0565	1.71e-05	Up
AT4G08755	U6.5	AT4G08755	3.05583	1.36e-06	Up
AT5G61780	Tudor2	AT5G61780	3.04928	9.7e-15	Up
AT1G09970	LRR XI-23	AT1G09970	3.0484	4.23e-08	Up
AT2G35387	AT2G35387	AT2G35387	3.04675	0.000300501	Up
AT1G64200	VHA-E3	AT1G64200	3.03932	6.94e-15	Up
AT2G03240	AT2G03240	AT2G03240	3.02174	1.66e-12	Up
AT5G23820	AT5G23820	AT5G23820	3.0197	4.93e-05	Up
AT1G26730	AT1G26730	AT1G26730	3.01772	7.03e-09	Up
AT2G41430	ERD15	AT2G41430	3.01741	3.6e-10	Up
AT2G38760	ANNAT3	AT2G38760	3.01323	1.44e-07	Up
AT5G40340	AT5G40340	AT5G40340	3.00529	1.76e-18	Up
AT3G05660	RLP33	AT3G05660	3.00519	0.0027497	Up
AT1G06160	ORA59	AT1G06160	3.00295	0.038319	Up
AT5G27660	DEG14	AT5G27660	3.00133	1.14e-06	Up
AT4G06315	AT4G06315	AT4G06315	2.99933	0.0129444	Up
AT2G37620	ACT1	AT2G37620	2.9885	2.31e-18	Up
AT1G09350	GolS3	AT1G09350	2.98847	0.0401807	Up
AT1G08115	U1.5	AT1G08115	2.98813	8.04e-05	Up
AT4G23550	WRKY29	AT4G23550	2.98434	0.0111314	Up
AT2G35930	PUB23	AT2G35930	2.98418	0.000187248	Up
AT2G45685	AT2G45685	AT2G45685	2.979	0.00928414	Up
AT3G06890	AT3G06890	AT3G06890	2.96734	0.00137663	Up
AT1G69050	AT1G69050	AT1G69050	2.9648	0.000194297	Up
AT1G61560	MLO6	AT1G61560	2.95849	0.000674198	Up
AT2G22890	AT2G22890	AT2G22890	2.95597	0.000130482	Up
AT3G01695	U1.7	AT3G01695	2.95291	4.44e-07	Up
AT1G19570	DHAR1	AT1G19570	2.94872	3.56e-07	Up
AT5G16360	AT5G16360	AT5G16360	2.94773	0.000112315	Up
AT5G20190	AT5G20190	AT5G20190	2.9464	3.43e-10	Up
AT4G21410	CRK29	AT4G21410	2.94611	1.27e-07	Up
AT2G27500	AT2G27500	AT2G27500	2.94413	0.000162794	Up
AT2G09225	AT2G09225	AT2G09225	2.93933	0.000172834	Up
AT4G27860	MEB1	AT4G27860	2.93431	0.00194922	Up
AT2G30020	AT2G30020	AT2G30020	2.93402	0.00176943	Up
AT1G20440	COR47	AT1G20440	2.93396	2.29e-06	Up
ATMG00570	ATMG00570	ATMG00570	2.93394	7.91e-07	Up
AT5G36925	AT5G36925	AT5G36925	2.93207	0.0135544	Up
AT1G29540	AT1G29540	AT1G29540	2.93113	0.0411274	Up
AT5G07070	CIPK2	AT5G07070	2.93019	5.51e-16	Up
AT5G27060	RLP53	AT5G27060	2.92966	0.0225152	Up
AT4G15975	AT4G15975	AT4G15975	2.92416	0.0169034	Up
AT4G21390	B120	AT4G21390	2.91723	0.0446027	Up
ATCG00930	ATCG00930	ATCG00930	2.91527	7.24e-07	Up
ATCG01200	ATCG01200	ATCG01200	2.9152	5.35e-07	Up
ATCG00960	ATCG00960	ATCG00960	2.9135	6.44e-07	Up
AT2G39330	JAL23	AT2G39330	2.91264	0.0037455	Up
ATCG01170	ATCG01170	ATCG01170	2.9111	6.55e-07	Up
AT1G71700	AT1G71700	AT1G71700	2.90938	3.16e-05	Up
AT2G32190	AT2G32190	AT2G32190	2.90708	0.00878396	Up
AT4G30530	GGP1	AT4G30530	2.90564	2.29e-06	Up
AT1G19380	AT1G19380	AT1G19380	2.89853	9.76e-05	Up
AT4G39950	CYP79B2	AT4G39950	2.89732	0.00317871	Up
AT2G20340	AAS	AT2G20340	2.89489	7.24e-06	Up
AT1G08643	AT1G08643	AT1G08643	2.8935	0.0495782	Up
AT1G28370	ERF11	AT1G28370	2.89075	0.00438523	Up
AT5G20230	BCB	AT5G20230	2.8814	0.0052062	Up
AT5G06990	AT5G06990	AT5G06990	2.88009	0.00761917	Up
AT1G09250	AT1G09250	AT1G09250	2.8764	1.34e-19	Up
AT5G24920	GDU5	AT5G24920	2.87339	0.00938636	Up
AT2G37025	TRFL8	AT2G37025	2.87337	1e-06	Up
AT3G22160	AT3G22160	AT3G22160	2.8732	0.00634829	Up
AT5G67300	MYBR1	AT5G67300	2.87265	2.16e-07	Up
AT3G52450	PUB22	AT3G52450	2.8717	0.000161581	Up
AT2G29450	GSTU5	AT2G29450	2.86834	4.54e-12	Up
AT2G44500	AT2G44500	AT2G44500	2.86428	0.000952827	Up
AT5G00765	AT5G00765	AT5G00765	2.86172	0.0159088	Up
AT5G63970	RGLG3	AT5G63970	2.86068	1.72e-05	Up
AT1G31550	AT1G31550	AT1G31550	2.85954	7.8e-12	Up
AT4G06705	AT4G06705	AT4G06705	2.85025	6.32e-05	Up
AT1G76070	AT1G76070	AT1G76070	2.84699	0.000301999	Up
AT5G06870	PGIP2	AT5G06870	2.84587	9.2e-06	Up
AT5G46330	FLS2 AT5G46330	AT5G46330	2.84319	6.95e-05	Up
AT2G35384	AT2G35384	AT2G35384	2.83494	0.0133541	Up
AT3G51440	AT3G51440	AT3G51440	2.82908	0.0042087	Up
ATMG00090	rps3 ATMG00090	ATMG00090	2.82488	2.42e-12	Up
AT5G61810	APC1	AT5G61810	2.82483	1.24e-16	Up
AT2G43530	AT2G43530	AT2G43530	2.82465	1.22e-07	Up
AT3G09032	AT3G09032	AT3G09032	2.82462	0.000581177	Up
AT1G09940	HEMA2	AT1G09940	2.82436	1.21e-06	Up
AT3G01715	U1.6	AT3G01715	2.82163	1.25e-06	Up
AT5G15970	KIN2	AT5G15970	2.82072	3.51e-05	Up
AT2G27080	AT2G27080	AT2G27080	2.8175	0.00305019	Up
AT4G37140	MEE69	AT4G37140	2.81107	0.0373485	Up
AT1G73010	PS2 AT1G73010	AT1G73010	2.81101	0.0468603	Up
AT5G01100	FRB1	AT5G01100	2.80936	0.00479674	Up
AT1G14250	AT1G14250	AT1G14250	2.80491	0.00130677	Up
AT5G28630	AT5G28630	AT5G28630	2.80454	0.00199909	Up
AT2G22850	bZIP6	AT2G22850	2.80067	5.7e-11	Up
AT1G07260	UGT71C3	AT1G07260	2.79891	0.0498421	Up
AT1G08930	ERD6	AT1G08930	2.79745	0.00044628	Up
AT5G17460	AT5G17460	AT5G17460	2.79443	0.0027736	Up
AT2G22790	AT2G22790	AT2G22790	2.78847	0.00013258	Up
AT2G20880	ERF53	AT2G20880	2.78364	0.00351045	Up
AT1G33790	AT1G33790	AT1G33790	2.7815	0.0281024	Up
AT1G76590	AT1G76590	AT1G76590	2.7775	0.00278759	Up
AT4G12005	AT4G12005	AT4G12005	2.77219	0.00383366	Up
AT2G04405	AT2G04405	AT2G04405	2.7711	0.00531297	Up
AT4G18280	AT4G18280	AT4G18280	2.76721	1.66e-07	Up
AT4G27852	AT4G27852	AT4G27852	2.76246	0.0146424	Up
AT1G30040	GA2OX2	AT1G30040	2.74996	0.000253838	Up
AT1G52410	TSA1 AT1G52410	AT1G52410	2.74941	6.93e-05	Up
AT4G30280	XTH18	AT4G30280	2.7473	0.0445819	Up
AT1G49530	GGPS6	AT1G49530	2.74687	1.79e-06	Up
AT5G15240	AT5G15240	AT5G15240	2.74546	3.43e-07	Up
AT2G42360	ATL41	AT2G42360	2.74025	0.00813004	Up
AT1G24070	CSLA10	AT1G24070	2.73956	0.016919	Up
AT5G64260	EXL2	AT5G64260	2.73307	1.55e-05	Up
AT1G59640	BPEp	AT1G59640	2.72874	4.73e-07	Up
AT2G36400	GRF3 AT2G36400	AT2G36400	2.72171	0.00617838	Up
AT2G34010	AT2G34010	AT2G34010	2.71985	1.22e-05	Up
AT4G16146	AT4G16146	AT4G16146	2.71898	0.0033358	Up
AT4G30560	CNGC9	AT4G30560	2.71429	8.27e-05	Up
AT4G35110	AT4G35110	AT4G35110	2.70911	0.000788278	Up
AT4G28140	AT4G28140	AT4G28140	2.70587	0.0110934	Up
AT3G21890	BBX31	AT3G21890	2.70507	0.00011763	Up
AT1G01470	LEA14	AT1G01470	2.70236	1.29e-05	Up
ATMG00990	AT2G07751 ATMG00990	ATMG00990	2.69521	2.01e-10	Up
AT2G07751	AT2G07751 AT2G07751	AT2G07751	2.68647	8.8e-11	Up
AT1G19550	AT1G19550	AT1G19550	2.6844	3.43e-06	Up
AT5G04105	U1.4	AT5G04105	2.68225	0.00815787	Up
AT5G07730	AT5G07730	AT5G07730	2.68222	2.75e-10	Up
AT1G61667	AT1G61667	AT1G61667	2.68154	5.83e-05	Up
AT5G55120	VTC5	AT5G55120	2.67453	1.18e-10	Up
AT4G15260	AT4G15260	AT4G15260	2.67421	5.67e-06	Up
AT5G41471	SNOR108	AT5G41471	2.67166	0.0141001	Up
AT4G15230	ABCG30	AT4G15230	2.66772	0.0160027	Up
ATCG01110	ndhH	ATCG01110	2.66692	5.34e-08	Up
AT1G53633	AT1G53633	AT1G53633	2.66681	2.68e-05	Up
AT1G29290	AT1G29290	AT1G29290	2.6597	0.024056	Up
AT5G10625	AT5G10625	AT5G10625	2.6575	0.0367237	Up
AT2G35382	AT2G35382	AT2G35382	2.65425	0.0227788	Up
AT5G02940	AT5G02940	AT5G02940	2.65326	9.04e-14	Up
AT5G58900	AT5G58900	AT5G58900	2.64951	1.1e-07	Up
AT5G67620	AT5G67620	AT5G67620	2.64774	0.0206424	Up
AT3G09480	AT3G09480	AT3G09480	2.64487	0.0168255	Up
AT1G70140	FH8	AT1G70140	2.64225	0.00456499	Up
AT3G06355	AT3G06355	AT3G06355	2.63963	3.17e-09	Up
AT2G42530	COR15B	AT2G42530	2.63451	9.07e-05	Up
AT5G53050	AT5G53050	AT5G53050	2.63146	3.61e-11	Up
AT4G06320	AT4G06320	AT4G06320	2.62348	0.0316736	Up
AT1G18740	AT1G18740	AT1G18740	2.62036	2.31e-05	Up
AT3G45140	LOX2	AT3G45140	2.61538	1.66e-05	Up
ATCG01210	ATCG01210	ATCG01210	2.60933	0.0371724	Up
ATCG00920	ATCG00920	ATCG00920	2.6076	0.0373485	Up
AT1G13790	FDM4	AT1G13790	2.60482	0.000224536	Up
AT5G04415	ath-MIR5657	AT5G04415	2.6033	0.0139391	Up
AT3G17120	AT3G17120	AT3G17120	2.60182	0.000138756	Up
AT4G15258	SNOR37-2	AT4G15258	2.60126	0.00591195	Up
AT3G47380	AT3G47380	AT3G47380	2.5968	0.0262855	Up
AT2G43520	TI2	AT2G43520	2.59461	0.00606239	Up
AT1G19310	AT1G19310	AT1G19310	2.59065	1.82e-09	Up
AT5G04250	AT5G04250	AT5G04250	2.58865	0.00324098	Up
AT1G78280	AT1G78280	AT1G78280	2.58799	1.71e-09	Up
AT5G50570	SPL13A	AT5G50570	2.58572	5.86e-08	Up
AT4G24960	HVA22D	AT4G24960	2.58547	6.16e-07	Up
AT1G69370	CM3	AT1G69370	2.58216	1.5e-10	Up
AT3G56825	U2.4 AT3G56825	AT3G56825	2.58069	3.28e-07	Up
AT1G19300	PARVUS	AT1G19300	2.57824	2.9e-06	Up
AT1G70690	HWI1	AT1G70690	2.57604	0.0110257	Up
AT5G13190	GILP	AT5G13190	2.57587	2.95e-05	Up
AT4G29780	AT4G29780	AT4G29780	2.57169	0.0436384	Up
AT1G53480	MRD1	AT1G53480	2.57044	0.0148237	Up
AT1G05273	U2.1	AT1G05273	2.5696	3.02e-06	Up
AT3G44260	CAF1a	AT3G44260	2.56909	0.0159088	Up
ATCG00680	psbB	ATCG00680	2.56579	0.00024455	Up
AT4G27560	AT4G27560	AT4G27560	2.56407	2.84e-06	Up
AT1G12240	ATBETAFRUCT4	AT1G12240	2.55685	2.61e-12	Up
AT5G44567	AT5G44567	AT5G44567	2.55661	0.0210454	Up
AT1G28190	AT1G28190	AT1G28190	2.55561	0.0248899	Up
AT5G36920	AT5G36920	AT5G36920	2.55397	0.00259779	Up
AT4G25780	AT4G25780	AT4G25780	2.55367	0.00103767	Up
AT4G18440	AT4G18440	AT4G18440	2.54954	0.000360989	Up
AT3G61640	AGP20	AT3G61640	2.54547	1.57e-11	Up
AT5G61455	U2.7 AT5G61455	AT5G61455	2.54422	0.00284031	Up
AT1G29640	AT1G29640	AT1G29640	2.54068	0.00211582	Up
AT1G66160	CMPG1	AT1G66160	2.54012	0.0325844	Up
AT3G55430	AT3G55430	AT3G55430	2.53786	5.14e-07	Up
AT3G60260	AT3G60260	AT3G60260	2.53682	2e-09	Up
AT2G41110	CAM2	AT2G41110	2.53425	2.43e-09	Up
AT2G04435	AT2G04435	AT2G04435	2.53186	0.00213015	Up
AT1G72180	AT1G72180	AT1G72180	2.53139	2.59e-09	Up
AT5G22250	CAF1b	AT5G22250	2.52802	0.0145367	Up
AT4G01895	AT4G01895	AT4G01895	2.52782	0.0207716	Up
AT5G50670	SPL13B	AT5G50670	2.52387	1.44e-07	Up
AT4G15248	BBX30	AT4G15248	2.52139	4.01e-05	Up
AT5G40210	UMAMIT42	AT5G40210	2.52086	1.13e-06	Up
AT3G08720	S6K2	AT3G08720	2.52023	0.00278929	Up
AT3G50650	AT3G50650	AT3G50650	2.51677	1.95e-05	Up
AT1G72280	ERO1	AT1G72280	2.51552	0.00910881	Up
AT4G18950	AT4G18950	AT4G18950	2.51514	1.55e-05	Up
ATCG00330	rps14	ATCG00330	2.51286	3.33e-07	Up
AT5G14700	AT5G14700	AT5G14700	2.50984	1e-07	Up
AT5G01830	SAUR21	AT5G01830	2.50936	3.97e-05	Up
AT1G18300	NUDT4	AT1G18300	2.50503	0.0165085	Up
AT5G41600	BTI3	AT5G41600	2.49785	5.52e-08	Up
AT1G25500	AT1G25500	AT1G25500	2.49736	9.94e-05	Up
AT3G02510	AT3G02510	AT3G02510	2.4953	1.12e-09	Up
AT2G22200	AT2G22200	AT2G22200	2.49341	0.0128274	Up
AT4G04840	MSRB6	AT4G04840	2.4932	0.00358978	Up
AT5G67410	AT5G67410	AT5G67410	2.49262	9.97e-05	Up
AT4G17610	AT4G17610	AT4G17610	2.48887	0.00177843	Up
AT1G64760	AT1G64760	AT1G64760	2.48885	0.000114442	Up
AT1G76040	CPK29	AT1G76040	2.48787	0.00111905	Up
AT2G21500	AT2G21500	AT2G21500	2.48481	7.22e-05	Up
AT5G03890	AT5G03890	AT5G03890	2.47721	0.00228851	Up
AT5G02200	FHL	AT5G02200	2.47509	0.00585986	Up
AT3G02570	MEE31	AT3G02570	2.47271	9.07e-10	Up
AT3G59710	AT3G59710	AT3G59710	2.46486	0.0230752	Up
AT1G74100	SOT16	AT1G74100	2.46261	2.73e-05	Up
AT5G15190	AT5G15190	AT5G15190	2.46216	0.0081785	Up
AT4G15440	HPL1	AT4G15440	2.45888	5.35e-05	Up
AT1G32690	AT1G32690	AT1G32690	2.45755	3.62e-06	Up
AT2G04455	U2.10b/12	AT2G04455	2.45699	0.00449467	Up
AT2G07675	AT2G07675 AT2G07675	AT2G07675	2.45061	0.00474527	Up
ATMG00980	AT2G07675 ATMG00980	ATMG00980	2.45061	0.00474527	Up
AT5G53060	RCF3	AT5G53060	2.44964	7.73e-21	Up
AT5G52310	LTI78	AT5G52310	2.44576	0.0197828	Up
AT5G64310	AGP1	AT5G64310	2.44568	0.0149321	Up
AT4G19390	AT4G19390	AT4G19390	2.43829	0.000471467	Up
AT5G52320	CYP96A4	AT5G52320	2.4374	3.57e-05	Up
AT4G24380	AT4G24380	AT4G24380	2.43674	0.00388987	Up
AT3G03170	AT3G03170	AT3G03170	2.43627	0.0439008	Up
ATCG00050	rps16	ATCG00050	2.43614	1.88e-11	Up
AT3G47820	PUB39	AT3G47820	2.4352	0.000136112	Up
AT3G25221	AT3G25221	AT3G25221	2.43457	0.0266239	Up
AT4G23420	AT4G23420	AT4G23420	2.42771	0.00212888	Up
AT3G57765	U2.3 AT3G57765	AT3G57765	2.42755	2.96e-05	Up
AT1G30320	AT1G30320	AT1G30320	2.41852	0.000145063	Up
AT2G22500	UCP5	AT2G22500	2.41318	0.00813164	Up
AT1G26218	AT1G26218	AT1G26218	2.41272	5.34e-07	Up
AT1G49450	AT1G49450	AT1G49450	2.41228	0.0281911	Up
AT1G61065	AT1G61065	AT1G61065	2.41054	1.87e-11	Up
AT4G34590	GBF6	AT4G34590	2.4077	4.3e-05	Up
AT5G09980	PROPEP4	AT5G09980	2.40699	0.00158696	Up
AT5G05140	AT5G05140	AT5G05140	2.40486	4.38e-07	Up
AT3G48660	AT3G48660	AT3G48660	2.39958	0.000409731	Up
AT3G15210	ERF4	AT3G15210	2.39811	7.38e-06	Up
AT3G14050	RSH2 AT3G14050	AT3G14050	2.39351	0.0164308	Up
AT5G16910	CSLD2	AT5G16910	2.39337	5.14e-07	Up
AT1G08920	ESL1	AT1G08920	2.39109	1.12e-06	Up
AT2G47180	GolS1	AT2G47180	2.38973	3.58e-05	Up
AT4G23600	CORI3	AT4G23600	2.38948	0.00324282	Up
AT5G04020	AT5G04020	AT5G04020	2.38498	1.02e-06	Up
AT2G32210	AT2G32210	AT2G32210	2.38256	0.0180665	Up
AT2G46310	CRF5	AT2G46310	2.38246	0.0367806	Up
AT5G49525	AT5G49525	AT5G49525	2.38082	0.0313875	Up
AT1G68340	AT1G68340	AT1G68340	2.38014	2.69e-05	Up
AT1G65486	AT1G65486	AT1G65486	2.37872	0.000859069	Up
AT3G17690	CNGC19	AT3G17690	2.37836	0.0241608	Up
AT1G01260	AT1G01260	AT1G01260	2.37219	5.15e-15	Up
AT2G29710	AT2G29710	AT2G29710	2.36921	0.00252424	Up
AT4G36830	HOS3-1	AT4G36830	2.36912	0.000262059	Up
AT5G44050	AT5G44050	AT5G44050	2.3686	0.000444609	Up
AT3G16400	NSP1	AT3G16400	2.36444	1.59e-06	Up
AT4G03420	AT4G03420	AT4G03420	2.36325	1.02e-07	Up
AT5G17000	AT5G17000	AT5G17000	2.35648	3.49e-05	Up
AT2G06995	AT2G06995	AT2G06995	2.35095	0.0213487	Up
AT5G59730	EXO70H7	AT5G59730	2.34825	8.01e-06	Up
AT3G52800	AT3G52800	AT3G52800	2.34526	8.87e-05	Up
ATCG00100	ATCG00100	ATCG00100	2.34452	0.000300866	Up
AT1G15580	IAA5	AT1G15580	2.34048	0.0147242	Up
AT4G27657	AT4G27657	AT4G27657	2.33749	4.26e-05	Up
ATCG00600	petG	ATCG00600	2.3354	3.77e-06	Up
AT5G13200	AT5G13200	AT5G13200	2.33256	0.000750287	Up
ATCG00140	atpH	ATCG00140	2.3284	3.7e-05	Up
AT5G10290	AT5G10290	AT5G10290	2.32763	1.75e-18	Up
AT4G36648	AT4G36648	AT4G36648	2.32614	1.66e-05	Up
AT5G01165	AT5G01165	AT5G01165	2.32448	0.0290127	Up
AT3G41979	AT2G01020 AT3G41979	AT3G41979	2.31374	5.37e-07	Up
AT1G52710	AT1G52710	AT1G52710	2.31266	1.34e-13	Up
AT2G01020	AT2G01020 AT2G01020	AT2G01020	2.31156	5.11e-07	Up
AT3G46620	RDUF1	AT3G46620	2.3115	0.00631468	Up
AT4G27410	RD26	AT4G27410	2.30655	0.0417142	Up
AT2G30720	AT2G30720	AT2G30720	2.30237	6.29e-09	Up
AT5G18860	NSH3	AT5G18860	2.29994	2.79e-06	Up
AT4G39030	EDS5	AT4G39030	2.29766	0.028346	Up
AT5G23510	AT5G23510	AT5G23510	2.29699	8.94e-06	Up
ATCG00130	atpF	ATCG00130	2.29104	6.75e-07	Up
AT1G05417	AT1G05417	AT1G05417	2.29066	0.0202399	Up
AT5G62350	AT5G62350	AT5G62350	2.28621	4.36e-05	Up
AT1G17750	PEPR2	AT1G17750	2.2854	0.00176372	Up
AT3G63050	AT3G63050	AT3G63050	2.28526	0.000933153	Up
AT5G54940	AT5G54940	AT5G54940	2.28315	2.62e-05	Up
AT1G29300	UNE1	AT1G29300	2.28292	7.29e-07	Up
AT3G46110	AT3G46110	AT3G46110	2.28227	0.0021754	Up
AT5G60300	LecRK-I.9	AT5G60300	2.27992	2.84e-05	Up
AT3G52770	ZPR3	AT3G52770	2.27962	0.000104131	Up
AT5G48450	sks3	AT5G48450	2.2783	0.00178412	Up
AT1G07128	AT1G07128	AT1G07128	2.278	0.022009	Up
AT5G63905	AT5G63905	AT5G63905	2.27762	5.62e-07	Up
AT4G13410	ATCSLA15	AT4G13410	2.27313	0.0328991	Up
AT1G17620	AT1G17620	AT1G17620	2.27098	1.95e-07	Up
AT3G58790	GAUT15	AT3G58790	2.26849	3.34e-07	Up
AT1G72510	AT1G72510	AT1G72510	2.26813	2.75e-06	Up
AT4G05010	FBS3	AT4G05010	2.26772	4.54e-08	Up
AT2G26440	AT2G26440	AT2G26440	2.26631	0.0227788	Up
AT1G06237	AT1G06237	AT1G06237	2.26513	0.000712207	Up
AT1G32860	AT1G32860	AT1G32860	2.2617	0.00709335	Up
ATCG00210	petN	ATCG00210	2.25807	1.59e-06	Up
AT1G10090	AT1G10090	AT1G10090	2.25572	2.94e-07	Up
AT1G09070	SRC2	AT1G09070	2.25436	0.00657801	Up
ATMG00340	ATMG00340	ATMG00340	2.25328	0.00740217	Up
AT2G07761	AT2G07761	AT2G07761	2.25315	0.00722672	Up
AT4G22980	AT4G22980	AT4G22980	2.252	0.0116326	Up
AT5G49480	CP1 AT5G49480	AT5G49480	2.25079	0.000464403	Up
AT1G13740	AFP2	AT1G13740	2.25076	0.000610321	Up
ATCG00860	ycf2 ATCG00860	ATCG00860	2.24726	1.51e-07	Up
AT5G05730	ASA1	AT5G05730	2.24507	0.00101166	Up
AT5G06860	PGIP1	AT5G06860	2.24447	0.000892893	Up
ATCG01280	ycf2 ATCG01280	ATCG01280	2.2393	2.49e-07	Up
AT4G05120	FUR1	AT4G05120	2.23929	0.00219706	Up
AT3G58710	WRKY69	AT3G58710	2.23705	3.05e-06	Up
AT1G28390	AT1G28390	AT1G28390	2.23342	0.00342937	Up
AT1G76390	PUB43	AT1G76390	2.22844	8.84e-07	Up
ATCG00270	psbD	ATCG00270	2.22241	0.000118743	Up
AT3G10985	SAG20	AT3G10985	2.22229	0.000809922	Up
AT3G19830	NTMC2T5.2	AT3G19830	2.22197	1.83e-11	Up
AT3G19240	AT3G19240	AT3G19240	2.21571	5.58e-06	Up
AT2G46270	GBF3	AT2G46270	2.21521	0.00268524	Up
AT5G55180	AT5G55180	AT5G55180	2.21036	0.0047805	Up
AT5G07920	DGK1	AT5G07920	2.20156	2.52e-10	Up
AT5G55930	OPT1	AT5G55930	2.2005	0.0144485	Up
AT1G51950	IAA18	AT1G51950	2.19449	1.17e-15	Up
AT1G08103	AT1G08103	AT1G08103	2.19252	0.0308191	Up
ATCG01190	ATCG01190	ATCG01190	2.19188	0.00297744	Up
AT3G13275	AT3G13275	AT3G13275	2.19067	5.57e-07	Up
ATCG00940	ATCG00940	ATCG00940	2.18914	0.00289896	Up
AT1G02660	AT1G02660	AT1G02660	2.18715	0.00265502	Up
AT2G38400	AGT3	AT2G38400	2.18622	0.00325967	Up
AT4G23060	IQD22	AT4G23060	2.18399	0.000639384	Up
AT4G03400	DFL2	AT4G03400	2.18314	1.17e-05	Up
AT5G43420	AT5G43420	AT5G43420	2.18165	0.0159593	Up
AT3G56200	AT3G56200	AT3G56200	2.18036	0.0180418	Up
AT1G80110	PP2-B11	AT1G80110	2.17969	0.00156737	Up
AT3G17860	JAZ3	AT3G17860	2.1739	1.82e-07	Up
AT1G59870	PEN3 AT1G59870	AT1G59870	2.17216	0.00432068	Up
AT4G36670	PMT6	AT4G36670	2.16955	0.00747131	Up
AT2G44200	AT2G44200	AT2G44200	2.16894	6.89e-09	Up
AT3G08275	AT3G08275	AT3G08275	2.16728	0.00136181	Up
AT5G67090	AT5G67090	AT5G67090	2.16642	0.0224174	Up
AT3G57930	AT3G57930	AT3G57930	2.16637	3.11e-09	Up
AT1G25220	ASB1	AT1G25220	2.16271	0.000672628	Up
AT5G24590	TIP	AT5G24590	2.16215	0.000101549	Up
AT3G55640	AT3G55640	AT3G55640	2.16196	2.2e-09	Up
AT1G61100	AT1G61100	AT1G61100	2.16052	1.07e-10	Up
AT1G16850	AT1G16850	AT1G16850	2.16021	0.0211166	Up
AT4G19230	CYP707A1	AT4G19230	2.15829	0.00943845	Up
AT3G51970	ASAT1	AT3G51970	2.15403	5.13e-06	Up
AT4G39980	DHS1	AT4G39980	2.15345	8.33e-05	Up
AT1G07743	AT1G07743	AT1G07743	2.14928	0.000148203	Up
AT1G08940	AT1G08940	AT1G08940	2.1492	0.017482	Up
AT4G32290	AT4G32290	AT4G32290	2.14737	2.14e-06	Up
ATCG00410	ATCG00410	ATCG00410	2.14674	4.53e-05	Up
ATCG01060	psaC	ATCG01060	2.14524	0.0023446	Up
AT5G09585	U2.5	AT5G09585	2.14464	0.000920244	Up
AT3G05800	AIF1	AT3G05800	2.14229	0.00197206	Up
AT2G28080	AT2G28080	AT2G28080	2.13983	7.62e-05	Up
AT1G06440	AT1G06440	AT1G06440	2.13981	0.0470417	Up
AT3G05500	AT3G05500	AT3G05500	2.13766	4.58e-06	Up
AT2G29420	GSTU7	AT2G29420	2.12648	7.28e-08	Up
AT5G66590	AT5G66590	AT5G66590	2.12644	0.00103377	Up
AT4G16500	AT4G16500	AT4G16500	2.12602	4.96e-07	Up
AT5G24600	AT5G24600	AT5G24600	2.12565	0.0437126	Up
AT2G34090	MEE18	AT2G34090	2.12561	4.74e-07	Up
AT5G04545	AT5G04545	AT5G04545	2.12049	0.000391479	Up
AT3G27960	KLCR2	AT3G27960	2.11219	1.99e-05	Up
AT2G32240	AT2G32240	AT2G32240	2.10831	2.53e-08	Up
AT5G24420	PGL5	AT5G24420	2.10634	0.00316459	Up
AT4G15765	AT4G15765	AT4G15765	2.10355	0.0315663	Up
ATCG00670	ATCG00670	ATCG00670	2.10204	1.61e-08	Up
AT2G28550	RAP2.7	AT2G28550	2.10052	8.44e-05	Up
AT4G15660	AT4G15660	AT4G15660	2.09751	0.0287141	Up
AT3G07735	AT3G07735	AT3G07735	2.09747	0.00296485	Up
AT2G20722	AT2G20722	AT2G20722	2.097	0.0102109	Up
AT4G13110	AT4G13110	AT4G13110	2.09251	0.00018018	Up
AT3G05220	AT3G05220	AT3G05220	2.09027	1.64e-05	Up
AT2G44230	AT2G44230	AT2G44230	2.08994	1.07e-06	Up
AT5G62770	AT5G62770	AT5G62770	2.08734	0.0161208	Up
AT5G49015	AT5G49015	AT5G49015	2.08659	0.00761363	Up
AT1G06640	AT1G06640	AT1G06640	2.08638	3.81e-05	Up
AT3G55940	AT3G55940	AT3G55940	2.08125	0.0164042	Up
ATCG01080	ndhG	ATCG01080	2.07911	0.000695687	Up
AT3G56360	AT3G56360	AT3G56360	2.0786	0.0150459	Up
AT1G66500	AT1G66500	AT1G66500	2.07788	0.00960397	Up
AT2G35343	AT2G35343	AT2G35343	2.07705	0.00969212	Up
AT2G06255	ELF4-L3	AT2G06255	2.07547	0.0187866	Up
AT5G10410	AT5G10410	AT5G10410	2.07089	0.00164008	Up
ATCG00240	ATCG00240	ATCG00240	2.06853	0.00030223	Up
AT3G45040	AT3G45040	AT3G45040	2.06227	7.23e-05	Up
AT4G25225	AT4G25225	AT4G25225	2.06043	2.75e-11	Up
AT3G18300	AT3G18300	AT3G18300	2.05874	3.6e-10	Up
AT1G12420	ACR8	AT1G12420	2.05752	0.00163179	Up
AT2G31940	AT2G31940	AT2G31940	2.05628	0.0138171	Up
AT1G70800	EHB1	AT1G70800	2.05592	0.0100407	Up
AT2G39770	CYT1	AT2G39770	2.05482	6.44e-08	Up
AT1G04187	AT1G04187	AT1G04187	2.0544	0.0339468	Up
AT5G56760	SERAT1;1	AT5G56760	2.0541	3.2e-09	Up
AT1G32460	AT1G32460	AT1G32460	2.05279	2.16e-07	Up
ATMG00660	ATMG00660	ATMG00660	2.05239	1.24e-14	Up
AT3G53650	AT3G53650	AT3G53650	2.05224	0.0119742	Up
AT4G31770	DBR1	AT4G31770	2.04906	1.88e-10	Up
ATCG00090	ATCG00090	ATCG00090	2.04627	0.000126714	Up
AT2G01610	AT2G01610	AT2G01610	2.04533	0.0441184	Up
AT1G52830	IAA6	AT1G52830	2.04461	0.0289035	Up
AT1G72120	AT1G72120	AT1G72120	2.04393	0.00135018	Up
AT2G36220	AT2G36220	AT2G36220	2.04174	0.0196379	Up
AT1G65890	AAE12	AT1G65890	2.04018	0.0421678	Up
AT3G03050	CSLD3	AT3G03050	2.03795	1.31e-09	Up
AT2G31010	AT2G31010	AT2G31010	2.03257	0.00927987	Up
AT1G76380	AT1G76380	AT1G76380	2.02944	8.87e-08	Up
AT1G33610	AT1G33610	AT1G33610	2.02879	0.00447963	Up
AT1G73210	AT1G73210	AT1G73210	2.02764	0.000953934	Up
AT1G62660	AT1G62660	AT1G62660	2.02697	4.74e-09	Up
AT3G05640	AT3G05640	AT3G05640	2.02625	0.000274429	Up
AT5G63370	AT5G63370	AT5G63370	2.02339	3.99e-06	Up
ATCG00190	rpoB	ATCG00190	2.02137	2.39e-05	Up
AT5G47060	AT5G47060	AT5G47060	2.01751	3.84e-05	Up
AT5G11740	AGP15	AT5G11740	2.01643	0.000342891	Up
AT3G22290	AT3G22290	AT3G22290	2.01641	4.88e-20	Up
ATCG00300	psbZ	ATCG00300	2.01615	0.000331922	Up
AT1G69870	NRT1.7	AT1G69870	2.01259	0.00128846	Up
AT3G09830	AT3G09830	AT3G09830	2.01184	0.00868307	Up
AT1G52000	AT1G52000	AT1G52000	2.0101	0.0284459	Up
AT5G48880	KAT5	AT5G48880	2.00977	0.00723635	Up
AT3G53000	PP2-A15	AT3G53000	2.00821	3.91e-07	Up
AT5G05365	AT5G05365	AT5G05365	2.00468	0.0209773	Up
AT5G07320	APC3	AT5G07320	2.00356	5.31e-07	Up
ATCG00110	ATCG00110	ATCG00110	2.00286	0.000248368	Up
AT1G56020	AT1G56020	AT1G56020	2.00018	0.00628677	Up
ATCG00380	rps4	ATCG00380	1.99977	1.42e-07	Up
ATCG00250	ATCG00250	ATCG00250	1.99786	0.011166	Up
AT1G10410	AT1G10410	AT1G10410	1.99012	0.000121319	Up
AT3G50410	OBP1	AT3G50410	1.9901	0.000349386	Up
AT1G24330	AT1G24330	AT1G24330	1.9899	0.000100261	Up
AT5G02600	NAKR1	AT5G02600	1.98775	1.19e-05	Up
AT1G70090	LGT8	AT1G70090	1.98729	9.97e-05	Up
AT5G66080	AT5G66080	AT5G66080	1.98711	0.0124869	Up
AT3G44320	NIT3	AT3G44320	1.98678	2.39e-07	Up
AT1G04733	U2.11	AT1G04733	1.98458	0.00214945	Up
AT1G20070	AT1G20070	AT1G20070	1.98236	0.0156044	Up
AT1G75166	AT1G75166	AT1G75166	1.9796	0.00181903	Up
AT3G12510	AT3G12510	AT3G12510	1.97707	0.0110348	Up
AT2G46520	AT2G46520	AT2G46520	1.97567	1.1e-09	Up
AT5G59550	RDUF2	AT5G59550	1.97565	0.0364012	Up
AT5G56160	AT5G56160	AT5G56160	1.97271	0.00126497	Up
AT3G27880	AT3G27880	AT3G27880	1.97171	0.00055096	Up
AT5G37440	AT5G37440	AT5G37440	1.96954	2.28e-05	Up
AT5G05590	PAI2	AT5G05590	1.96758	8.06e-05	Up
AT4G24370	PROS	AT4G24370	1.96596	5.51e-16	Up
AT1G06033	AT1G06033	AT1G06033	1.96449	0.00427928	Up
AT4G23220	CRK14	AT4G23220	1.96326	0.0161342	Up
AT5G25450	AT5G25450	AT5G25450	1.96208	0.00848779	Up
AT2G30600	AT2G30600	AT2G30600	1.96199	0.00467035	Up
ATCG00650	rps18	ATCG00650	1.96169	3.7e-08	Up
AT1G73480	AT1G73480	AT1G73480	1.95966	0.000192737	Up
AT2G05215	AT2G05215	AT2G05215	1.95735	0.0337436	Up
AT1G22510	AT1G22510	AT1G22510	1.9573	2.73e-06	Up
AT3G25870	AT3G25870	AT3G25870	1.95532	0.000883821	Up
AT2G46650	CB5-C	AT2G46650	1.95506	0.0047805	Up
AT5G64850	AT5G64850	AT5G64850	1.95463	1.14e-07	Up
AT1G79075	AT1G79075	AT1G79075	1.95061	0.00077281	Up
AT5G16200	AT5G16200	AT5G16200	1.94914	6.33e-06	Up
AT3G09490	AT3G09490	AT3G09490	1.94828	0.00256565	Up
AT1G49520	AT1G49520	AT1G49520	1.94819	0.000498104	Up
ATCG00160	rps2	ATCG00160	1.93842	8.16e-07	Up
ATCG00660	rpl20	ATCG00660	1.93702	0.00152183	Up
AT2G46620	AT2G46620	AT2G46620	1.93626	0.0234747	Up
AT1G06553	AT1G06553	AT1G06553	1.9347	0.00452316	Up
AT2G23320	WRKY15	AT2G23320	1.9345	0.0233441	Up
AT3G04175	AT3G04175	AT3G04175	1.92703	0.0307507	Up
AT2G04375	U2.10	AT2G04375	1.92646	0.00967432	Up
AT2G07671	AT2G07671	AT2G07671	1.92616	0.000797354	Up
AT5G59920	ULI3	AT5G59920	1.92535	1.97e-05	Up
AT5G67150	AT5G67150	AT5G67150	1.92469	0.000259671	Up
AT5G25790	AT5G25790	AT5G25790	1.92284	0.0185946	Up
AT3G56260	AT3G56260	AT3G56260	1.92268	0.000213376	Up
AT1G66350	RGL1	AT1G66350	1.92156	2.67e-06	Up
AT2G28305	LOG1	AT2G28305	1.91934	1.3e-06	Up
AT1G21550	AT1G21550	AT1G21550	1.91736	0.0499871	Up
AT2G23010	SCPL9	AT2G23010	1.91662	0.0444941	Up
AT1G76062	ath-MIR835	AT1G76062	1.91045	0.0150133	Up
AT1G02405	AT1G02405	AT1G02405	1.90945	0.0179491	Up
AT4G19960	KUP9	AT4G19960	1.90749	0.000164276	Up
AT2G38070	AT2G38070	AT2G38070	1.89856	0.0438483	Up
AT4G05631	AT4G05631	AT4G05631	1.89633	0.0123318	Up
AT5G63490	AT5G63490	AT5G63490	1.89613	2.36e-08	Up
AT4G31500	CYP83B1	AT4G31500	1.89492	0.0025537	Up
AT2G07696	RPS7 AT2G07696	AT2G07696	1.8927	0.00303794	Up
AT4G10930	AT4G10930	AT4G10930	1.89258	3.7e-07	Up
AT5G64700	UMAMIT21	AT5G64700	1.89071	0.00334039	Up
AT3G56705	U2.6 AT3G56705	AT3G56705	1.88623	0.0184909	Up
AT3G11591	AT3G11591	AT3G11591	1.8849	0.00187642	Up
ATCG01300	rpl23 ATCG01300	ATCG01300	1.88302	1.51e-06	Up
AT3G17130	AT3G17130	AT3G17130	1.88286	0.0128274	Up
AT3G21230	4CL5	AT3G21230	1.88123	0.0401905	Up
AT3G16870	GATA17	AT3G16870	1.88086	0.0156467	Up
AT5G10310	AT5G10310	AT5G10310	1.87838	0.00131292	Up
AT1G22550	AT1G22550	AT1G22550	1.87774	0.0189256	Up
AT3G02880	AT3G02880	AT3G02880	1.87759	6.63e-09	Up
ATCG00840	rpl23 ATCG00840	ATCG00840	1.8767	1.76e-06	Up
AT1G04070	TOM22-I	AT1G04070	1.87666	1.87e-08	Up
AT1G25275	AT1G25275	AT1G25275	1.87401	2.23e-05	Up
AT4G17895	UBP20	AT4G17895	1.87174	1.83e-06	Up
AT5G01730	SCAR4	AT5G01730	1.86804	0.00141905	Up
AT5G64660	CMPG2	AT5G64660	1.86585	0.0175697	Up
AT1G60270	BGLU6	AT1G60270	1.8645	0.011002	Up
AT5G04480	AT5G04480	AT5G04480	1.86308	5.5e-11	Up
AT4G27500	PPI1	AT4G27500	1.86268	8.92e-23	Up
AT2G07599	AT2G07599	AT2G07599	1.86232	0.0159986	Up
AT4G36520	AT4G36520	AT4G36520	1.86003	2.56e-05	Up
AT5G54470	BBX29	AT5G54470	1.8595	0.000138528	Up
AT2G17480	MLO8	AT2G17480	1.8592	6.31e-05	Up
AT3G51090	AT3G51090	AT3G51090	1.85873	2.69e-05	Up
AT1G13360	AT1G13360	AT1G13360	1.85646	0.00101649	Up
AT4G09030	AGP10	AT4G09030	1.85408	0.000133595	Up
AT2G38500	AT2G38500	AT2G38500	1.85355	0.00505421	Up
AT4G25770	AT4G25770	AT4G25770	1.85285	3.43e-10	Up
AT3G62720	XT1	AT3G62720	1.85242	0.000868145	Up
AT1G29535	AT1G29535	AT1G29535	1.85119	0.0292231	Up
AT2G46192	AT2G46192	AT2G46192	1.84978	7.37e-07	Up
AT3G57760	AT3G57760	AT3G57760	1.84836	0.000216254	Up
AT3G56620	UMAMIT10	AT3G56620	1.84729	0.000134318	Up
AT5G19875	AT5G19875	AT5G19875	1.84609	0.0296152	Up
AT2G09700	AT2G09700	AT2G09700	1.84479	1.67e-05	Up
AT1G04625	AT1G04625	AT1G04625	1.8437	3.6e-08	Up
AT5G10750	AT5G10750	AT5G10750	1.84338	6.91e-08	Up
ATMG09740	ATMG09740	ATMG09740	1.83912	0.00101601	Up
AT1G21740	AT1G21740	AT1G21740	1.83547	0.040843	Up
AT1G16500	AT1G16500	AT1G16500	1.83275	0.00314294	Up
AT3G16330	AT3G16330	AT3G16330	1.83257	0.028346	Up
AT4G29950	AT4G29950	AT4G29950	1.8313	0.0019716	Up
AT4G39940	AKN2	AT4G39940	1.83076	0.0237658	Up
AT2G46410	CPC	AT2G46410	1.82985	0.0300799	Up
AT2G30870	GSTF10	AT2G30870	1.82616	0.000419326	Up
ATCG00540	petA	ATCG00540	1.82615	4.9e-05	Up
AT1G01140	CIPK9	AT1G01140	1.82063	0.00154076	Up
AT1G20600	AT1G20600	AT1G20600	1.81605	9.14e-06	Up
AT5G67020	AT5G67020	AT5G67020	1.8143	0.0396332	Up
AT2G01150	RHA2B	AT2G01150	1.81412	0.000926037	Up
ATCG00470	atpE	ATCG00470	1.81369	1.14e-05	Up
AT3G25400	AT3G25400	AT3G25400	1.81105	0.000338007	Up
AT5G44210	ERF9	AT5G44210	1.80583	0.0359453	Up
AT1G70480	AT1G70480	AT1G70480	1.80397	8.66e-10	Up
AT1G19640	JMT	AT1G19640	1.80341	0.0101711	Up
AT5G20480	EFR	AT5G20480	1.79805	2.9e-05	Up
AT4G06255	AT4G06255	AT4G06255	1.79731	0.0119695	Up
AT1G17340	AT1G17340	AT1G17340	1.79402	0.000464403	Up
AT3G19010	AT3G19010	AT3G19010	1.79245	0.00900639	Up
AT4G37730	bZIP7	AT4G37730	1.79176	0.0132251	Up
AT2G04080	AT2G04080	AT2G04080	1.79123	2.56e-05	Up
AT1G71100	RSW10	AT1G71100	1.78851	0.00100031	Up
ATMG01080	atp9	ATMG01080	1.78656	0.00232626	Up
AT2G25250	AT2G25250	AT2G25250	1.78266	4.38e-07	Up
AT5G52570	BETA-OHASE 2	AT5G52570	1.77977	0.00216845	Up
AT5G59732	AT5G59732	AT5G59732	1.77956	0.00183438	Up
AT1G52280	RABG3d	AT1G52280	1.77792	6.62e-06	Up
AT2G38290	AMT2	AT2G38290	1.77733	0.00211549	Up
AT3G07725	AT3G07725	AT3G07725	1.77276	0.00580805	Up
AT3G13910	AT3G13910	AT3G13910	1.77258	0.00012438	Up
AT3G11420	AT3G11420	AT3G11420	1.77109	0.000173254	Up
AT1G06573	AT1G06573	AT1G06573	1.76724	3.73e-08	Up
AT4G39640	GGT1 AT4G39640	AT4G39640	1.7539	0.00187252	Up
AT1G75860	AT1G75860	AT1G75860	1.75006	3.39e-06	Up
AT1G78240	TSD2	AT1G78240	1.74878	2.55e-08	Up
AT3G18170	AT3G18170	AT3G18170	1.74314	0.00189168	Up
AT5G15650	RGP2	AT5G15650	1.74287	4.42e-05	Up
AT4G37260	MYB73	AT4G37260	1.74114	0.00980554	Up
ATCG01040	ccsA	ATCG01040	1.74108	1.79e-05	Up
AT1G78660	GGH1	AT1G78660	1.74013	7.86e-08	Up
AT1G60260	AT1G60260	AT1G60260	1.73985	1.65e-05	Up
AT5G03630	ATMDAR2	AT5G03630	1.7376	3.14e-05	Up
AT1G17410	AT1G17410	AT1G17410	1.7355	8.59e-09	Up
AT1G75220	ERDL6	AT1G75220	1.73217	3.29e-05	Up
ATMG01280	ATMG01280	ATMG01280	1.73152	0.0127391	Up
AT3G05490	RALFL22	AT3G05490	1.72955	0.00019307	Up
AT5G43620	AT5G43620	AT5G43620	1.72939	0.0129518	Up
AT2G23680	AT2G23680	AT2G23680	1.72921	0.0278891	Up
AT1G48360	AT1G48360	AT1G48360	1.72788	0.0350313	Up
AT5G01445	AT5G01445	AT5G01445	1.72748	0.0285813	Up
AT3G02875	ILR1	AT3G02875	1.72553	0.000379997	Up
AT1G27770	ACA1 AT1G27770	AT1G27770	1.72231	0.00523694	Up
AT3G52500	AT3G52500	AT3G52500	1.72153	0.000454493	Up
AT1G13390	AT1G13390	AT1G13390	1.7207	0.0015072	Up
AT1G72360	ERF73	AT1G72360	1.71966	0.0128787	Up
AT2G28900	OEP16-1	AT2G28900	1.71807	0.00201132	Up
AT5G50940	AT5G50940	AT5G50940	1.71453	0.040356	Up
AT5G64560	MGT9	AT5G64560	1.71261	1.52e-07	Up
AT3G20362	AT3G20362	AT3G20362	1.71153	1.91e-05	Up
AT1G78210	AT1G78210	AT1G78210	1.70807	5.58e-06	Up
AT2G04400	AT2G04400	AT2G04400	1.70496	0.000141345	Up
AT4G35630	PSAT	AT4G35630	1.70496	0.00188591	Up
ATCG00350	psaA	ATCG00350	1.70401	0.00876861	Up
AT1G77420	AT1G77420	AT1G77420	1.70228	1.66e-07	Up
AT1G71697	CK1 AT1G71697	AT1G71697	1.70079	0.0128274	Up
AT5G08500	AT5G08500	AT5G08500	1.70006	2.41e-08	Up
AT1G05010	EFE	AT1G05010	1.69504	0.000687325	Up
AT3G52470	AT3G52470	AT3G52470	1.69313	0.000358771	Up
AT5G60860	RABA1f	AT5G60860	1.69061	7.58e-05	Up
AT5G05330	AT5G05330	AT5G05330	1.68985	0.0479435	Up
AT4G31780	MGD1	AT4G31780	1.68854	7.58e-05	Up
AT2G39250	SNZ	AT2G39250	1.68495	0.00970607	Up
AT1G69610	AT1G69610	AT1G69610	1.67955	0.00722672	Up
AT5G18150	AT5G18150	AT5G18150	1.67753	6.77e-07	Up
AT4G35550	WOX13	AT4G35550	1.67601	0.000210352	Up
AT1G09800	AT1G09800	AT1G09800	1.67466	0.00329773	Up
AT5G36220	CYP81D1	AT5G36220	1.67203	0.0154195	Up
AT3G20600	NDR1	AT3G20600	1.67041	0.00580484	Up
AT3G03020	AT3G03020	AT3G03020	1.66571	3.43e-06	Up
AT3G53960	AT3G53960	AT3G53960	1.66176	0.000837934	Up
AT1G25250	IDD16	AT1G25250	1.65901	0.00638746	Up
ATMG00670	ATMG00670	ATMG00670	1.65878	0.0476198	Up
AT5G60850	OBP4	AT5G60850	1.6581	0.000287827	Up
AT4G17670	AT4G17670	AT4G17670	1.65807	0.0304517	Up
AT3G50910	AT3G50910	AT3G50910	1.65544	0.00279206	Up
AT4G12790	AT4G12790	AT4G12790	1.65457	1.26e-09	Up
AT1G10700	PRS3	AT1G10700	1.65268	0.00037131	Up
AT5G06710	HAT14	AT5G06710	1.65082	0.000895224	Up
AT1G25370	AT1G25370	AT1G25370	1.64785	0.00609493	Up
AT1G75440	UBC16	AT1G75440	1.64543	0.00790659	Up
AT2G07815	AT2G07815	AT2G07815	1.64337	0.0101153	Up
AT5G53420	AT5G53420	AT5G53420	1.64273	0.00761462	Up
AT3G47420	G3Pp1	AT3G47420	1.64202	0.00257455	Up
AT1G14330	AT1G14330	AT1G14330	1.64135	0.00269837	Up
AT5G55050	AT5G55050	AT5G55050	1.6409	0.0437301	Up
AT1G68862	AT1G68862	AT1G68862	1.63861	0.0064239	Up
AT1G72470	EXO70D1	AT1G72470	1.63764	2.93e-05	Up
AT2G22122	AT2G22122	AT2G22122	1.63594	0.0259748	Up
AT3G19150	KRP6	AT3G19150	1.63117	0.00171666	Up
AT4G27660	AT4G27660	AT4G27660	1.62995	0.023444	Up
AT3G56020	AT3G56020	AT3G56020	1.6228	0.00119035	Up
AT2G13790	SERK4	AT2G13790	1.61897	0.00901402	Up
AT3G56800	CAM3	AT3G56800	1.61542	7.03e-05	Up
AT1G05805	AT1G05805	AT1G05805	1.61391	0.000151143	Up
AT4G25030	AT4G25030	AT4G25030	1.61352	2.27e-05	Up
AT1G23850	AT1G23850	AT1G23850	1.61164	0.00413987	Up
AT3G57120	AT3G57120	AT3G57120	1.61005	0.000106313	Up
AT2G34810	AT2G34810	AT2G34810	1.60908	0.00968748	Up
AT4G27350	AT4G27350	AT4G27350	1.60574	1.37e-06	Up
AT4G39890	RABH1c	AT4G39890	1.60521	0.0466392	Up
AT5G61380	TOC1	AT5G61380	1.60508	0.0347815	Up
AT2G47650	UXS4	AT2G47650	1.60283	2.55e-08	Up
AT1G09960	SUT4	AT1G09960	1.59743	0.0128163	Up
AT5G57630	CIPK21	AT5G57630	1.59606	0.00561648	Up
AT2G46490	AT2G46490	AT2G46490	1.59586	1.14e-08	Up
AT3G47570	AT3G47570	AT3G47570	1.59363	0.00154218	Up
AT1G50640	ERF3	AT1G50640	1.59307	1.88e-07	Up
AT1G07000	EXO70B2	AT1G07000	1.59169	0.0447933	Up
AT5G28262	AT5G28262	AT5G28262	1.59004	0.0379391	Up
ATCG00780	rpl14	ATCG00780	1.58762	0.00070185	Up
AT4G31510	AT4G31510	AT4G31510	1.58583	0.00357318	Up
AT1G70780	AT1G70780	AT1G70780	1.58562	4.41e-05	Up
AT4G18530	AT4G18530	AT4G18530	1.57825	4e-05	Up
AT3G57600	AT3G57600	AT3G57600	1.57822	0.0116142	Up
AT4G30240	AT4G30240	AT4G30240	1.57456	7.95e-07	Up
AT2G01450	MPK17	AT2G01450	1.5736	2.7e-06	Up
AT3G17800	AT3G17800	AT3G17800	1.57223	0.00354047	Up
AT5G66210	CPK28	AT5G66210	1.57085	0.0371898	Up
AT5G11970	AT5G11970	AT5G11970	1.57082	0.00641471	Up
AT3G53180	NodGS	AT3G53180	1.56876	1.34e-07	Up
AT1G09995	AT1G09995	AT1G09995	1.56692	9.78e-10	Up
AT2G46100	AT2G46100	AT2G46100	1.56375	0.00286681	Up
AT5G54960	PDC2	AT5G54960	1.56206	0.00902758	Up
AT4G01850	SAM-2	AT4G01850	1.56165	3.16e-08	Up
AT1G09180	SARA1A	AT1G09180	1.55921	0.00026705	Up
ATMG01000	ATMG01000	ATMG01000	1.55728	0.00442913	Up
AT1G52240	ROPGEF11	AT1G52240	1.55619	0.00100406	Up
AT3G19030	AT3G19030	AT3G19030	1.55293	0.0120562	Up
AT5G28450	AT5G28450	AT5G28450	1.55264	1.01e-05	Up
AT1G27130	GSTU13	AT1G27130	1.55217	1.31e-05	Up
AT5G54970	AT5G54970	AT5G54970	1.55031	0.0320023	Up
AT2G31360	ADS2	AT2G31360	1.54999	0.000765388	Up
AT1G17980	PAPS1	AT1G17980	1.54999	1.06e-06	Up
AT2G43320	AT2G43320	AT2G43320	1.54832	0.00127528	Up
AT5G49280	AT5G49280	AT5G49280	1.54507	0.0032169	Up
AT1G73500	MKK9	AT1G73500	1.54426	0.0350103	Up
AT5G13500	AT5G13500	AT5G13500	1.54059	5.31e-10	Up
AT3G15060	RABA1g	AT3G15060	1.53984	2.32e-05	Up
AT2G33380	RD20	AT2G33380	1.53798	0.0209451	Up
AT2G30990	AT2G30990	AT2G30990	1.53191	2.24e-05	Up
AT5G27680	RECQSIM	AT5G27680	1.52774	0.012399	Up
ATCG00220	psbM	ATCG00220	1.52599	0.00368665	Up
AT4G21560	VPS28-1	AT4G21560	1.5226	2.28e-05	Up
AT5G39790	AT5G39790	AT5G39790	1.52208	4.53e-05	Up
AT5G67640	AT5G67640	AT5G67640	1.522	0.0483689	Up
AT2G07718	AT2G07718	AT2G07718	1.52178	8.87e-05	Up
AT4G11350	AT4G11350	AT4G11350	1.5197	0.0174003	Up
AT2G22910	NAGS1	AT2G22910	1.5187	2.64e-07	Up
AT2G24330	AT2G24330	AT2G24330	1.51828	3.17e-06	Up
AT5G26770	AT5G26770	AT5G26770	1.51688	0.0249146	Up
AT4G02195	SYP42	AT4G02195	1.51665	0.000112677	Up
AT5G43380	TOPP6	AT5G43380	1.51465	0.0466983	Up
AT2G05765	AT2G05765	AT2G05765	1.51442	0.0430897	Up
AT4G18070	AT4G18070	AT4G18070	1.51432	1.39e-05	Up
AT3G19130	RBP47B	AT3G19130	1.51353	1.87e-11	Up
AT1G17860	KTI5	AT1G17860	1.51203	0.0192235	Up
AT2G25820	ESE2	AT2G25820	1.51175	0.037603	Up
AT1G25560	TEM1	AT1G25560	1.50916	0.0389036	Up
AT1G61380	SD1-29	AT1G61380	1.50673	0.0161208	Up
AT4G14680	APS3	AT4G14680	1.50664	0.0192387	Up
ATCG00500	accD	ATCG00500	1.5061	2.64e-07	Up
AT5G16160	AT5G16160	AT5G16160	1.50535	0.0204725	Up
AT5G63460	AT5G63460	AT5G63460	1.50413	5.04e-10	Up
AT1G77370	AT1G77370	AT1G77370	1.50288	5.21e-05	Up
AT4G12040	SAP7	AT4G12040	1.50264	1.7e-07	Up
AT1G14740	TTA1	AT1G14740	1.50188	6.34e-06	Up
AT3G26980	MUB4	AT3G26980	1.49788	2.66e-05	Up
AT1G18745	AT1G18745	AT1G18745	1.49601	0.000305221	Up
AT3G28930	AIG2	AT3G28930	1.4957	0.00422982	Up
AT2G29730	UGT71D1	AT2G29730	1.49482	0.010028	Up
AT2G04066	AT2G04066	AT2G04066	1.4928	0.000882923	Up
AT2G43020	PAO2	AT2G43020	1.49215	9.92e-05	Up
AT5G06750	AT5G06750	AT5G06750	1.48978	0.00760593	Up
AT4G30600	AT4G30600	AT4G30600	1.48861	7.47e-06	Up
AT4G36515	AT4G36515	AT4G36515	1.48646	1.67e-05	Up
AT2G05260	AT2G05260	AT2G05260	1.48491	0.000750628	Up
AT5G25440	AT5G25440	AT5G25440	1.48241	0.00891993	Up
AT2G22010	RKP	AT2G22010	1.48061	0.000499989	Up
AT3G04230	AT3G04230	AT3G04230	1.4802	2.56e-05	Up
AT4G08870	ARGAH2	AT4G08870	1.47701	0.014846	Up
AT5G21990	TPR7	AT5G21990	1.47498	3.3e-10	Up
AT3G05715	AT3G05715	AT3G05715	1.47207	0.0102021	Up
AT2G37570	SLT1	AT2G37570	1.46715	5.36e-06	Up
AT3G10260	AT3G10260	AT3G10260	1.4661	1.89e-06	Up
ATMG00080	rpl16 ATMG00080	ATMG00080	1.46279	0.011759	Up
AT4G21215	AT4G21215	AT4G21215	1.46176	0.000695564	Up
AT4G38810	AT4G38810	AT4G38810	1.4616	0.000226197	Up
AT1G11440	AT1G11440	AT1G11440	1.46134	4.53e-05	Up
AT4G05330	AGD13	AT4G05330	1.45765	0.0300073	Up
AT1G32630	AT1G32630	AT1G32630	1.45629	2.23e-05	Up
AT2G27470	NF-YB11	AT2G27470	1.45518	0.0011916	Up
AT3G20390	AT3G20390	AT3G20390	1.45379	0.000618052	Up
AT4G01250	WRKY22	AT4G01250	1.45072	0.0342899	Up
AT4G12070	AT4G12070	AT4G12070	1.44436	0.00623901	Up
AT5G27860	AT5G27860	AT5G27860	1.43892	7.72e-12	Up
AT1G73150	GTE3	AT1G73150	1.43731	9.27e-05	Up
AT5G14710	AT5G14710	AT5G14710	1.43651	1.08e-06	Up
AT1G77885	AT1G77885	AT1G77885	1.43447	0.0343797	Up
AT3G15750	AT3G15750	AT3G15750	1.43305	0.0483713	Up
AT1G02270	AT1G02270	AT1G02270	1.43189	4.9e-05	Up
AT2G19530	AT2G19530	AT2G19530	1.42839	0.0406424	Up
AT5G26038	ath-MIR860	AT5G26038	1.42656	0.000751428	Up
AT1G63860	AT1G63860	AT1G63860	1.42445	0.0345418	Up
AT1G76180	ERD14	AT1G76180	1.4229	0.000416043	Up
AT4G22590	TPPG	AT4G22590	1.42126	0.0325844	Up
AT5G40450	AT5G40450	AT5G40450	1.41966	0.0282856	Up
AT2G44940	AT2G44940	AT2G44940	1.41723	0.025319	Up
AT1G58270	ZW9	AT1G58270	1.41655	0.0317354	Up
AT4G32030	AT4G32030	AT4G32030	1.4159	1.25e-07	Up
ATMG01190	atp1	ATMG01190	1.41587	0.0022128	Up
AT1G63830	AT1G63830	AT1G63830	1.41584	2.8e-06	Up
AT3G13110	SERAT2;2	AT3G13110	1.41424	0.000484891	Up
AT3G55760	AT3G55760	AT3G55760	1.40984	0.0054032	Up
AT2G41082	AT2G41082	AT2G41082	1.40983	0.0200226	Up
AT2G37550	AGD7	AT2G37550	1.40861	2.59e-07	Up
AT2G27580	AT2G27580	AT2G27580	1.40859	0.000180699	Up
AT5G40330	MYB23	AT5G40330	1.40856	0.0357562	Up
ATCG00820	ATCG00820	ATCG00820	1.40745	0.000147749	Up
AT1G03080	NET1D	AT1G03080	1.40735	6.82e-05	Up
AT3G21070	NADK1	AT3G21070	1.40507	0.00877941	Up
AT4G15490	UGT84A3	AT4G15490	1.40464	0.00819643	Up
AT3G24100	AT3G24100	AT3G24100	1.40262	9.33e-06	Up
AT3G50950	ZAR1	AT3G50950	1.40202	0.0111426	Up
AT1G07240	UGT71C5	AT1G07240	1.40099	0.000155556	Up
AT2G46720	KCS13	AT2G46720	1.40055	0.0335307	Up
AT2G27230	LHW	AT2G27230	1.39813	0.000380762	Up
AT1G44790	AT1G44790	AT1G44790	1.39504	1.53e-08	Up
AT1G17940	AT1G17940	AT1G17940	1.39496	0.0171628	Up
AT5G57150	AT5G57150	AT5G57150	1.39438	0.0342946	Up
AT3G57330	ACA11	AT3G57330	1.39404	3.03e-05	Up
AT4G19020	CMT2	AT4G19020	1.39364	0.00969212	Up
AT1G76700	AT1G76700	AT1G76700	1.38963	0.00491828	Up
AT5G18400	AT5G18400	AT5G18400	1.38811	0.000407528	Up
AT4G17720	AT4G17720	AT4G17720	1.38811	0.00010905	Up
AT1G25682	AT1G25682	AT1G25682	1.38655	1.21e-06	Up
AT5G54075	U3D	AT5G54075	1.38609	0.0250347	Up
AT4G24060	AT4G24060	AT4G24060	1.38592	0.00101165	Up
AT1G19680	AT1G19680	AT1G19680	1.38521	1.38e-05	Up
AT2G07715	AT2G07715	AT2G07715	1.38518	0.0447933	Up
AT1G62310	AT1G62310	AT1G62310	1.38282	0.0491867	Up
AT5G60840	AT5G60840	AT5G60840	1.3799	1.38e-05	Up
AT1G69760	AT1G69760	AT1G69760	1.37654	0.00283725	Up
AT2G07698	AT2G07698	AT2G07698	1.37386	0.00368497	Up
AT1G53430	AT1G53430	AT1G53430	1.37268	0.006294	Up
AT4G15140	AT4G15140	AT4G15140	1.37169	0.00112465	Up
AT1G66730	LIG6	AT1G66730	1.3716	0.0429126	Up
AT1G33590	AT1G33590	AT1G33590	1.37037	0.0149601	Up
AT4G27870	AT4G27870	AT4G27870	1.3695	0.00223076	Up
AT3G55390	AT3G55390	AT3G55390	1.36791	0.0479596	Up
AT1G07020	AT1G07020	AT1G07020	1.3663	0.000369569	Up
AT3G44190	AT3G44190	AT3G44190	1.36542	0.000416717	Up
AT5G62570	AT5G62570	AT5G62570	1.36459	0.0463274	Up
AT3G14200	AT3G14200	AT3G14200	1.36294	0.00161017	Up
AT2G02020	PTR4	AT2G02020	1.36191	0.0353164	Up
AT3G51460	RHD4	AT3G51460	1.36146	8.75e-09	Up
ATCG00900	rps7-A ATCG00900	ATCG00900	1.36139	5.59e-05	Up
ATCG01240	rps7-A ATCG01240	ATCG01240	1.36131	5.63e-05	Up
AT3G22942	AGG2	AT3G22942	1.36039	0.0022128	Up
AT2G31810	AT2G31810	AT2G31810	1.35964	2.6e-09	Up
AT1G06630	AT1G06630	AT1G06630	1.35874	1.85e-05	Up
AT5G63980	SAL1	AT5G63980	1.35535	0.00067181	Up
AT4G37640	ACA2 AT4G37640	AT4G37640	1.35466	0.0224851	Up
ATMG01380	ATMG01380	ATMG01380	1.35144	0.0279658	Up
AT5G10830	AT5G10830	AT5G10830	1.34753	0.0309214	Up
AT1G70820	AT1G70820	AT1G70820	1.34477	0.00790389	Up
ATCG00790	rpl16 ATCG00790	ATCG00790	1.34461	0.00229759	Up
AT4G38550	AT4G38550	AT4G38550	1.34395	0.0473445	Up
AT3G02150	PTF1	AT3G02150	1.34359	0.00913577	Up
AT1G50460	HKL1	AT1G50460	1.34196	0.0133943	Up
AT2G17705	AT2G17705	AT2G17705	1.34008	0.00723137	Up
AT2G34585	AT2G34585	AT2G34585	1.34006	6.46e-08	Up
AT4G15450	AT4G15450	AT4G15450	1.33978	0.00351045	Up
AT3G55050	AT3G55050	AT3G55050	1.3393	0.000200971	Up
AT5G19070	AT5G19070	AT5G19070	1.33834	3.81e-07	Up
AT4G36945	AT4G36945	AT4G36945	1.33797	0.040254	Up
AT3G03590	AT3G03590	AT3G03590	1.33491	0.000282592	Up
AT3G24550	PERK1	AT3G24550	1.33446	1.24e-08	Up
AT3G47510	AT3G47510	AT3G47510	1.33391	0.00968748	Up
AT5G63320	NPX1	AT5G63320	1.33195	0.0178572	Up
AT3G20490	AT3G20490	AT3G20490	1.33069	0.0423305	Up
AT4G18520	AT4G18520	AT4G18520	1.32981	2.95e-05	Up
AT3G11880	AT3G11880	AT3G11880	1.32715	0.00135917	Up
ATCG00170	rpoC2	ATCG00170	1.32704	0.0020895	Up
AT2G28510	AT2G28510	AT2G28510	1.32675	0.00112146	Up
AT3G58630	AT3G58630	AT3G58630	1.32637	2.91e-05	Up
AT2G40205	AT2G40205	AT2G40205	1.3235	0.00723179	Up
AT1G14590	AT1G14590	AT1G14590	1.32317	0.00640153	Up
AT2G37470	AT2G37470	AT2G37470	1.32258	0.0475301	Up
AT1G22270	AT1G22270	AT1G22270	1.32208	0.000144156	Up
AT2G32380	AT2G32380	AT2G32380	1.32165	0.00952572	Up
ATCG00640	rpl33	ATCG00640	1.32148	0.00885858	Up
AT1G51805	AT1G51805	AT1G51805	1.31927	0.028806	Up
AT5G17210	AT5G17210	AT5G17210	1.31917	0.0144395	Up
AT5G59740	AT5G59740	AT5G59740	1.31915	0.0244042	Up
AT2G20410	AT2G20410	AT2G20410	1.31828	0.000427676	Up
AT5G50840	AT5G50840	AT5G50840	1.31822	8.16e-06	Up
AT5G53360	AT5G53360	AT5G53360	1.31647	0.000915142	Up
AT1G77060	AT1G77060	AT1G77060	1.31608	0.000807933	Up
AT5G62680	GTR2	AT5G62680	1.31545	0.0146803	Up
AT5G57015	ckl12	AT5G57015	1.31401	2.81e-05	Up
AT3G11120	AT3G11120	AT3G11120	1.31357	0.00932023	Up
AT4G31570	AT4G31570	AT4G31570	1.3126	0.00217549	Up
AT1G01300	AT1G01300	AT1G01300	1.3043	0.0178814	Up
AT1G42470	AT1G42470	AT1G42470	1.30386	1.76e-05	Up
AT5G66658	AT5G66658	AT5G66658	1.30068	0.048156	Up
AT3G16350	AT3G16350	AT3G16350	1.30065	0.000226066	Up
AT1G17455	ELF4-L4	AT1G17455	1.29931	0.00783316	Up
AT5G02950	AT5G02950	AT5G02950	1.29704	0.00173717	Up
AT2G41420	WIH2	AT2G41420	1.29584	1.27e-06	Up
AT4G39190	AT4G39190	AT4G39190	1.29227	0.0119632	Up
AT3G09455	AT3G09455	AT3G09455	1.29141	0.000208805	Up
AT3G57880	AT3G57880	AT3G57880	1.29141	0.0013142	Up
AT5G20050	AT5G20050	AT5G20050	1.28587	0.00124509	Up
AT2G20840	SCAMP3	AT2G20840	1.28127	1.35e-05	Up
AT3G47675	AT3G47675	AT3G47675	1.2803	0.00806504	Up
AT3G09520	EXO70H4	AT3G09520	1.28004	0.0379599	Up
AT2G40460	AT2G40460	AT2G40460	1.27987	0.0204106	Up
AT1G05120	AT1G05120	AT1G05120	1.27892	0.00101398	Up
AT1G08973	AT1G08973	AT1G08973	1.27854	0.00327627	Up
AT1G72170	AT1G72170	AT1G72170	1.27765	3.42e-06	Up
AT4G23270	CRK19	AT4G23270	1.27683	0.0482019	Up
ATCG00180	rpoC1	ATCG00180	1.27615	0.00316497	Up
AT1G74380	XXT5	AT1G74380	1.27558	9.74e-05	Up
AT2G06530	VPS2.1	AT2G06530	1.27118	0.00426436	Up
AT4G29670	ACHT2	AT4G29670	1.27011	4.47e-08	Up
AT3G44850	AT3G44850	AT3G44850	1.26697	4.92e-05	Up
AT5G62960	AT5G62960	AT5G62960	1.26507	0.0280216	Up
AT1G08507	AT1G08507	AT1G08507	1.26336	0.0463621	Up
AT5G04560	DME	AT5G04560	1.26296	5.03e-05	Up
ATCG01020	rpl32	ATCG01020	1.26289	0.00257934	Up
AT2G38050	DET2	AT2G38050	1.25912	0.000310498	Up
AT5G50430	UBC33	AT5G50430	1.25855	0.00163765	Up
AT2G07708	AT2G07708	AT2G07708	1.25764	0.000484891	Up
AT1G12620	AT1G12620	AT1G12620	1.25506	0.00435761	Up
AT1G09575	AT1G09575	AT1G09575	1.25013	0.02559	Up
AT1G76190	AT1G76190	AT1G76190	1.24872	0.033211	Up
AT1G08200	AXS2	AT1G08200	1.24839	0.00106719	Up
AT1G34760	GRF11	AT1G34760	1.24766	0.011884	Up
AT3G20410	CPK9	AT3G20410	1.24761	9.7e-05	Up
AT1G24100	UGT74B1	AT1G24100	1.24691	0.0326108	Up
AT1G22360	UGT85A2	AT1G22360	1.24672	0.0222773	Up
AT5G65020	ANNAT2	AT5G65020	1.24654	0.0156211	Up
AT5G13100	AT5G13100	AT5G13100	1.24569	0.0318958	Up
AT1G21380	AT1G21380	AT1G21380	1.24249	4.9e-05	Up
AT3G47836	AT3G47836	AT3G47836	1.24087	6.66e-08	Up
AT5G46510	AT5G46510	AT5G46510	1.24055	0.0192507	Up
ATMG01170	atp6-2	ATMG01170	1.23823	0.017632	Up
AT5G63880	VPS20.1	AT5G63880	1.23655	0.0145907	Up
AT4G36960	AT4G36960	AT4G36960	1.23501	2.17e-07	Up
AT3G53370	AT3G53370	AT3G53370	1.23389	0.00290502	Up
AT3G55350	AT3G55350	AT3G55350	1.23329	0.00139442	Up
AT5G08565	AT5G08565	AT5G08565	1.23273	0.00390995	Up
AT5G21105	AT5G21105	AT5G21105	1.22949	0.0142483	Up
AT3G53680	AT3G53680	AT3G53680	1.22837	0.041671	Up
AT1G23490	ARF1 AT1G23490	AT1G23490	1.22646	1.67e-07	Up
AT5G43403	AT5G43403	AT5G43403	1.22524	0.00333166	Up
AT2G37940	AtIPCS2	AT2G37940	1.22463	0.0358538	Up
AT4G16760	ACX1	AT4G16760	1.22441	0.00182168	Up
AT1G49650	AT1G49650	AT1G49650	1.22365	0.0163541	Up
AT1G33230	AT1G33230	AT1G33230	1.22236	0.000105968	Up
AT3G01310	AT3G01310	AT3G01310	1.21671	0.00696593	Up
AT4G29940	PRHA	AT4G29940	1.21514	4.24e-06	Up
AT2G22482	AT2G22482	AT2G22482	1.21247	0.0447933	Up
AT4G35570	HMGB5	AT4G35570	1.21125	5.82e-11	Up
AT3G62000	AT3G62000	AT3G62000	1.20863	0.000963403	Up
AT1G80520	AT1G80520	AT1G80520	1.20813	0.0099062	Up
AT3G01430	AT3G01430	AT3G01430	1.2076	0.0327272	Up
AT3G27420	AT3G27420	AT3G27420	1.20573	0.00213031	Up
AT5G26030	FC1 AT5G26030	AT5G26030	1.20567	0.0125339	Up
AT1G27930	AT1G27930	AT1G27930	1.20239	6.74e-05	Up
AT1G25211	AT1G25211	AT1G25211	1.20155	0.0155154	Up
AT2G45820	AT2G45820	AT2G45820	1.20005	0.000934291	Up
AT1G61730	AT1G61730	AT1G61730	1.20004	0.000298171	Up
AT1G71950	AT1G71950	AT1G71950	1.19566	0.000714955	Up
AT5G58730	Mik	AT5G58730	1.1934	0.00372296	Up
AT5G11670	NADP-ME2	AT5G11670	1.1928	0.00486172	Up
AT1G20816	AT1G20816	AT1G20816	1.19251	3.86e-06	Up
AT5G04870	CPK1	AT5G04870	1.19185	0.000127486	Up
AT1G16916	AT1G16916	AT1G16916	1.18818	8.52e-05	Up
AT4G17085	AT4G17085	AT4G17085	1.18569	0.00182659	Up
AT1G73030	VPS46.2	AT1G73030	1.18467	0.000322556	Up
AT5G13490	AAC2	AT5G13490	1.18424	0.0440525	Up
AT4G31820	ENP	AT4G31820	1.18395	0.0022128	Up
AT2G05812	AT2G05812	AT2G05812	1.18363	0.0187494	Up
AT5G18255	AT5G18255	AT5G18255	1.1834	0.0195938	Up
AT2G28890	PLL4	AT2G28890	1.18329	0.0497011	Up
AT5G58090	AT5G58090	AT5G58090	1.18261	0.00422951	Up
AT2G01010	AT2G01010	AT2G01010	1.18207	0.0353811	Up
AT5G08330	TCP11	AT5G08330	1.18045	0.0185642	Up
AT2G23672	AT2G23672	AT2G23672	1.17934	0.00578787	Up
AT5G17870	PSRP6	AT5G17870	1.17736	0.00147061	Up
AT3G51160	MUR1	AT3G51160	1.17721	0.0003326	Up
AT3G08520	AT3G08520	AT3G08520	1.17625	0.0147895	Up
AT3G03160	AT3G03160	AT3G03160	1.17464	1.14e-09	Up
AT1G56045	AT1G56045	AT1G56045	1.17381	0.00133516	Up
AT2G43540	AT2G43540	AT2G43540	1.17224	0.00777132	Up
AT1G69360	AT1G69360	AT1G69360	1.17184	0.0406013	Up
AT5G13340	AT5G13340	AT5G13340	1.17089	0.000113256	Up
AT3G18295	AT3G18295	AT3G18295	1.16929	0.000119096	Up
ATCG00080	psbI	ATCG00080	1.1654	0.0369129	Up
AT5G44720	AT5G44720	AT5G44720	1.16467	0.0194137	Up
AT3G62010	AT3G62010	AT3G62010	1.16382	9.12e-05	Up
AT5G10700	AT5G10700	AT5G10700	1.16196	0.000253451	Up
AT1G59650	CW14	AT1G59650	1.15948	2.58e-06	Up
AT4G02370	AT4G02370	AT4G02370	1.15941	0.00453347	Up
AT4G33625	AT4G33625	AT4G33625	1.15796	0.00264493	Up
AT4G18890	BEH3	AT4G18890	1.15779	0.0311556	Up
AT1G71110	AT1G71110	AT1G71110	1.15653	0.0439008	Up
AT5G64130	AT5G64130	AT5G64130	1.15544	4.54e-08	Up
AT1G52290	PERK15	AT1G52290	1.15307	0.0187852	Up
ATMG00690	ATMG00690	ATMG00690	1.152	0.0340988	Up
AT5G57290	AT5G57290	AT5G57290	1.15165	0.00831411	Up
AT4G27070	TSB2	AT4G27070	1.15149	0.0437126	Up
AT2G38140	PSRP4	AT2G38140	1.14835	0.0196456	Up
AT2G30500	NET4B	AT2G30500	1.14804	0.0465597	Up
AT1G71080	AT1G71080	AT1G71080	1.14561	0.00877941	Up
AT3G12030	AT3G12030	AT3G12030	1.14354	8.05e-06	Up
AT3G60980	AT3G60980	AT3G60980	1.14344	0.0313461	Up
AT4G05050	UBQ11	AT4G05050	1.14324	0.00484568	Up
AT4G13400	AT4G13400	AT4G13400	1.1418	0.0013759	Up
AT3G11440	MYB65	AT3G11440	1.14165	0.0437126	Up
AT4G37790	HAT22	AT4G37790	1.14139	0.0191436	Up
AT3G58530	AT3G58530	AT3G58530	1.14037	0.0408345	Up
AT5G64816	AT5G64816	AT5G64816	1.13991	5.11e-05	Up
AT5G08130	BIM1	AT5G08130	1.13981	0.00384366	Up
AT4G13520	SMAP1	AT4G13520	1.13673	0.00201706	Up
AT3G08710	TH9	AT3G08710	1.13537	0.00473058	Up
AT5G42570	AT5G42570	AT5G42570	1.13303	0.00316497	Up
AT1G20780	SAUL1	AT1G20780	1.13271	0.0340988	Up
AT3G07780	OBE1	AT3G07780	1.13245	0.0300073	Up
AT1G68770	AT1G68770	AT1G68770	1.12987	0.00682193	Up
AT3G07910	AT3G07910	AT3G07910	1.12764	0.000152623	Up
AT1G75310	AUL1	AT1G75310	1.12537	0.0208159	Up
AT5G65575	AT5G65575	AT5G65575	1.12476	5.25e-05	Up
AT1G16060	ADAP	AT1G16060	1.12255	0.0204072	Up
AT1G76065	AT1G76065	AT1G76065	1.12251	0.00145827	Up
AT1G69840	AT1G69840	AT1G69840	1.1217	0.0388928	Up
AT1G20270	AT1G20270	AT1G20270	1.12064	2.07e-05	Up
AT5G24430	AT5G24430	AT5G24430	1.12015	0.00177843	Up
AT2G47260	WRKY23	AT2G47260	1.11944	0.0365881	Up
ATCG01050	ATCG01050	ATCG01050	1.11842	0.0168748	Up
AT3G50750	BEH1	AT3G50750	1.11836	0.0177273	Up
AT2G37975	AT2G37975	AT2G37975	1.11549	6.63e-06	Up
AT5G49550	BLOS2	AT5G49550	1.11529	2.51e-05	Up
AT5G64160	AT5G64160	AT5G64160	1.11362	9.85e-05	Up
AT4G24920	AT4G24920	AT4G24920	1.113	0.0353214	Up
AT5G15930	PAM1	AT5G15930	1.11223	0.000691208	Up
AT4G02600	MLO1	AT4G02600	1.11171	0.00899348	Up
AT5G13390	NEF1	AT5G13390	1.11098	2.05e-08	Up
AT4G17260	AT4G17260	AT4G17260	1.10925	0.0330352	Up
AT1G29465	AT1G29465	AT1G29465	1.10595	0.00290749	Up
AT2G07585	AT2G07585	AT2G07585	1.10577	0.0109205	Up
AT1G21010	AT1G21010	AT1G21010	1.10294	0.0253586	Up
AT4G24015	AT4G24015	AT4G24015	1.10209	0.0348471	Up
AT3G06300	P4H2	AT3G06300	1.10181	3.51e-06	Up
AT4G29210	GGT4	AT4G29210	1.10169	0.0038839	Up
AT4G08590	ORTHL	AT4G08590	1.10094	0.0431252	Up
AT3G05580	TOPP9	AT3G05580	1.10048	0.00278039	Up
AT2G23348	AT2G23348	AT2G23348	1.10025	0.044908	Up
AT2G27710	AT2G27710	AT2G27710	1.09928	0.0167246	Up
AT5G07350	Tudor1	AT5G07350	1.09652	0.000713133	Up
AT2G36145	AT2G36145	AT2G36145	1.09574	0.0237658	Up
AT4G29440	AT4G29440	AT4G29440	1.09572	0.00637987	Up
AT1G59820	ALA3	AT1G59820	1.09423	0.00503001	Up
AT4G24830	AT4G24830	AT4G24830	1.09422	0.00692864	Up
AT4G13950	RALFL31	AT4G13950	1.09401	0.0209773	Up
AT3G16500	PAP1 AT3G16500	AT3G16500	1.09367	3.84e-05	Up
AT3G53730	AT3G53730	AT3G53730	1.09353	0.037789	Up
AT2G45460	AT2G45460	AT2G45460	1.09152	0.0184228	Up
AT5G53590	AT5G53590	AT5G53590	1.09117	0.0242692	Up
AT1G01950	ARK2	AT1G01950	1.09036	2.78e-07	Up
AT5G52200	I-2	AT5G52200	1.08779	0.000110862	Up
AT1G27350	AT1G27350	AT1G27350	1.08753	0.0283362	Up
AT5G24980	AT5G24980	AT5G24980	1.08624	0.00174399	Up
AT5G51620	AT5G51620	AT5G51620	1.08535	0.00142475	Up
AT1G09687	ath-MIR4228	AT1G09687	1.08047	0.0304188	Up
AT3G43810	CAM7	AT3G43810	1.07992	0.0021137	Up
AT5G65380	AT5G65380	AT5G65380	1.07943	0.00387198	Up
AT5G37780	CAM1	AT5G37780	1.07921	0.00116199	Up
AT3G52870	AT3G52870	AT3G52870	1.07335	0.0265682	Up
AT1G54690	GAMMA-H2AX	AT1G54690	1.07317	0.0290186	Up
AT1G06800	PLA-I{gamma}1	AT1G06800	1.07257	0.000508023	Up
AT1G70790	AT1G70790	AT1G70790	1.07242	8.36e-06	Up
AT4G25890	AT4G25890	AT4G25890	1.07127	0.0338003	Up
AT4G14340	CKI1 AT4G14340	AT4G14340	1.07096	0.00013723	Up
AT2G15730	AT2G15730	AT2G15730	1.07053	0.0154665	Up
AT3G48570	AT3G48570	AT3G48570	1.07039	2.51e-05	Up
AT5G57000	AT5G57000	AT5G57000	1.06906	0.00257934	Up
AT3G45090	AT3G45090	AT3G45090	1.06901	0.0129196	Up
AT4G30440	GAE1	AT4G30440	1.06795	0.00380163	Up
AT1G19170	AT1G19170	AT1G19170	1.06788	1.21e-06	Up
AT3G56910	PSRP5	AT3G56910	1.06666	0.016987	Up
AT5G62070	IQD23	AT5G62070	1.06512	0.0389673	Up
AT1G53840	PME1 AT1G53840	AT1G53840	1.06165	0.0472323	Up
AT4G37660	AT4G37660	AT4G37660	1.06082	0.0312282	Up
AT5G16560	KAN	AT5G16560	1.06067	0.00351045	Up
AT2G29700	PH1	AT2G29700	1.05754	1.83e-06	Up
AT5G56750	NDL1	AT5G56750	1.05676	0.000360989	Up
AT4G33430	BAK1	AT4G33430	1.05673	0.0317309	Up
AT4G11830	PLDGAMMA2	AT4G11830	1.05665	0.00278759	Up
AT2G05185	AT2G05185	AT2G05185	1.05553	0.0397168	Up
AT5G57660	COL5	AT5G57660	1.0552	0.029668	Up
AT3G13050	NiaP	AT3G13050	1.0535	0.0226351	Up
AT2G38000	AT2G38000	AT2G38000	1.05251	0.00216268	Up
AT4G37820	AT4G37820	AT4G37820	1.05192	0.000206394	Up
AT1G45163	AT1G45163	AT1G45163	1.05092	0.0283274	Up
AT4G34430	CHB3	AT4G34430	1.05049	0.00063488	Up
AT4G15240	AT4G15240	AT4G15240	1.05006	0.00201356	Up
AT3G59760	OASC	AT3G59760	1.04998	0.00747131	Up
AT3G59050	PAO3	AT3G59050	1.04847	0.0207558	Up
AT1G09027	AT1G09027	AT1G09027	1.0481	0.000350587	Up
AT5G62390	BAG7	AT5G62390	1.04804	0.00632968	Up
AT1G65440	GTB1	AT1G65440	1.04716	0.00229759	Up
AT1G12310	AT1G12310	AT1G12310	1.04643	5.34e-08	Up
AT2G30100	AT2G30100	AT2G30100	1.04628	0.0109573	Up
AT3G23255	AT3G23255	AT3G23255	1.04504	0.0092942	Up
AT5G43190	AT5G43190	AT5G43190	1.0433	0.00315533	Up
AT5G12010	AT5G12010	AT5G12010	1.04216	0.00360627	Up
AT5G41810	AT5G41810	AT5G41810	1.04048	0.000212889	Up
AT4G30780	AT4G30780	AT4G30780	1.03988	0.0154676	Up
AT2G36307	ZPR4	AT2G36307	1.03846	0.0342854	Up
AT3G01280	VDAC1	AT3G01280	1.03823	4.54e-08	Up
AT3G12965	AT3G12965	AT3G12965	1.03782	0.0112929	Up
AT2G20260	PSAE-2	AT2G20260	1.03759	0.00319026	Up
AT2G31490	AT2G31490	AT2G31490	1.03713	1.09e-06	Up
AT1G27910	PUB45	AT1G27910	1.0346	0.0010322	Up
AT3G12630	SAP5	AT3G12630	1.0331	0.0017819	Up
AT1G61570	TIM13	AT1G61570	1.03294	0.00789225	Up
AT5G64880	AT5G64880	AT5G64880	1.03248	0.000970614	Up
AT4G29390	AT4G29390	AT4G29390	1.03219	0.000342577	Up
AT1G72175	AT1G72175	AT1G72175	1.02958	5.44e-05	Up
AT5G67510	AT5G67510	AT5G67510	1.02568	0.0123926	Up
AT5G55860	AT5G55860	AT5G55860	1.02566	0.0458258	Up
AT3G49100	AT3G49100	AT3G49100	1.02426	1.51e-05	Up
AT1G16790	AT1G16790	AT1G16790	1.02134	0.0447121	Up
AT3G18440	ALMT9	AT3G18440	1.02098	0.00270317	Up
AT5G16760	ITPK1	AT5G16760	1.0202	7.9e-06	Up
AT5G67180	TOE3	AT5G67180	1.02017	0.04777	Up
AT5G63150	AT5G63150	AT5G63150	1.01956	5.48e-06	Up
AT1G67060	AT1G67060	AT1G67060	1.01833	0.0167465	Up
AT2G43460	AT2G43460	AT2G43460	1.01772	0.0228172	Up
AT1G11780	AT1G11780	AT1G11780	1.01707	0.00110607	Up
AT4G30210	ATR2	AT4G30210	1.01644	0.0053296	Up
AT4G17870	PYR1	AT4G17870	1.01542	0.0100328	Up
AT4G39260	CCR1 AT4G39260	AT4G39260	1.01535	0.00105062	Up
AT4G02350	SEC15B	AT4G02350	1.01293	0.00877941	Up
AT4G26750	EXT-like	AT4G26750	1.01212	0.00901402	Up
AT3G56160	AT3G56160	AT3G56160	1.01178	0.0344853	Up
AT1G14920	GAI	AT1G14920	1.01025	0.0216224	Up
AT4G12000	AT4G12000	AT4G12000	1.0094	0.0364582	Up
AT4G37630	CYCD5;1	AT4G37630	1.00888	0.00294934	Up
AT5G22608	AT5G22608	AT5G22608	1.00883	0.0278492	Up
AT2G30860	GSTF9	AT2G30860	1.00798	0.0299181	Up
AT3G58840	PMD1	AT3G58840	1.00769	0.00181395	Up
AT1G73200	AT1G73200	AT1G73200	1.00768	0.000209675	Up
AT5G55040	AT5G55040	AT5G55040	1.00751	0.00240455	Up
AT5G09250	KIWI	AT5G09250	1.00585	0.000184993	Up
AT1G19580	GAMMA CA1	AT1G19580	1.00269	0.000876436	Up
AT1G76660	AT1G76660	AT1G76660	1.00196	0.000273341	Up
AT1G75945	AT1G75945	AT1G75945	-6.6566	4.21e-06	Down
AT4G01430	UMAMIT29	AT4G01430	-5.59346	0.0410151	Down
AT3G52700	AT3G52700	AT3G52700	-5.50768	0.000953934	Down
AT1G02190	AT1G02190	AT1G02190	-5.22734	0.00478889	Down
AT3G63088	RTFL14	AT3G63088	-5.22707	0.00591012	Down
AT4G11485	LCR11	AT4G11485	-5.12273	0.0339468	Down
AT3G57670	NTT	AT3G57670	-5.10197	0.00258987	Down
AT5G20635	AGG3	AT5G20635	-5.10175	0.0219266	Down
AT1G64405	AT1G64405	AT1G64405	-4.81337	0.00740742	Down
AT1G60590	AT1G60590	AT1G60590	-4.74528	0.000185608	Down
AT1G69490	NAP	AT1G69490	-4.66428	3.96e-05	Down
AT5G58360	OFP3	AT5G58360	-4.51773	0.0166903	Down
AT1G07900	LBD1	AT1G07900	-4.51358	0.0100307	Down
AT4G13660	PRR2	AT4G13660	-4.44345	0.0194072	Down
AT1G02850	BGLU11	AT1G02850	-4.43524	1.21e-05	Down
AT1G31490	AT1G31490	AT1G31490	-4.40431	0.0387024	Down
AT5G65320	AT5G65320	AT5G65320	-4.31975	0.0490209	Down
AT1G43310	AT1G43310	AT1G43310	-4.31917	0.0232997	Down
AT5G14090	AT5G14090	AT5G14090	-4.30825	0.0214251	Down
AT5G10100	TPPI	AT5G10100	-4.29153	0.0441852	Down
AT3G58780	SHP1	AT3G58780	-4.22404	0.000433599	Down
AT1G73830	BEE3	AT1G73830	-4.21988	8.76e-05	Down
AT4G33320	AT4G33320	AT4G33320	-4.21153	0.0323138	Down
AT4G31440	AT4G31440	AT4G31440	-4.19628	0.0133693	Down
AT5G25190	ESE3	AT5G25190	-4.18533	8.28e-09	Down
AT5G47610	AT5G47610	AT5G47610	-4.15679	5.56e-10	Down
AT1G25530	AT1G25530	AT1G25530	-4.15629	1.51e-05	Down
AT4G28270	RMA2	AT4G28270	-4.13286	6.34e-08	Down
AT5G10970	AT5G10970	AT5G10970	-4.1222	2.12e-05	Down
AT3G63210	AT3G63210	AT3G63210	-4.09237	4.16e-08	Down
AT5G38865	AT5G38865	AT5G38865	-4.09088	0.0368945	Down
AT1G10550	XTH33	AT1G10550	-4.05047	0.0352595	Down
AT1G07513	AT1G07513	AT1G07513	-4.04441	0.0204689	Down
AT5G17523	AT5G17523	AT5G17523	-4.03729	0.0482277	Down
AT2G08435	AT2G08435	AT2G08435	-4.00212	0.0423421	Down
AT4G14130	XTH15	AT4G14130	-3.98597	0.0244042	Down
AT3G49580	LSU1	AT3G49580	-3.94761	0.0267726	Down
AT1G80440	AT1G80440	AT1G80440	-3.94255	1.07e-05	Down
AT4G14819	AT4G14819	AT4G14819	-3.93464	0.0310051	Down
AT5G15830	bZIP3	AT5G15830	-3.89069	1.74e-06	Down
AT3G21420	LBO1	AT3G21420	-3.88939	0.00998915	Down
AT5G59990	AT5G59990	AT5G59990	-3.881	0.00196775	Down
AT1G63070	AT1G63070	AT1G63070	-3.87681	0.0447933	Down
AT4G34970	ADF9	AT4G34970	-3.84998	0.00168118	Down
AT1G56010	NAC1	AT1G56010	-3.84813	0.0030458	Down
AT2G41080	AT2G41080	AT2G41080	-3.80337	0.00825036	Down
AT5G20110	AT5G20110	AT5G20110	-3.79915	1.08e-08	Down
AT5G38900	AT5G38900	AT5G38900	-3.78585	0.046545	Down
AT1G26790	AT1G26790	AT1G26790	-3.74513	5.27e-06	Down
AT2G20670	AT2G20670	AT2G20670	-3.73389	4.71e-07	Down
AT3G02380	COL2	AT3G02380	-3.72522	8.18e-23	Down
AT1G78990	AT1G78990	AT1G78990	-3.71589	0.0499871	Down
AT3G55580	AT3G55580	AT3G55580	-3.67157	0.0037173	Down
AT4G38340	AT4G38340	AT4G38340	-3.63815	0.0382201	Down
AT5G10930	CIPK5	AT5G10930	-3.62954	1.24e-07	Down
AT3G23930	AT3G23930	AT3G23930	-3.57107	0.000525788	Down
AT1G68570	AT1G68570	AT1G68570	-3.56448	1.06e-11	Down
AT3G46130	MYB48	AT3G46130	-3.55158	8.45e-05	Down
AT2G36800	DOGT1	AT2G36800	-3.55088	0.00480639	Down
AT3G58070	GIS	AT3G58070	-3.51569	4.66e-06	Down
AT3G14395	AT3G14395	AT3G14395	-3.50467	0.0159986	Down
AT4G26288	AT4G26288	AT4G26288	-3.49407	1.97e-05	Down
AT1G74875	AT1G74875	AT1G74875	-3.4805	0.000444609	Down
AT1G49200	AT1G49200	AT1G49200	-3.4734	3.69e-06	Down
AT2G24762	GDU4	AT2G24762	-3.45093	9.45e-06	Down
AT3G24460	AT3G24460	AT3G24460	-3.45062	1.95e-06	Down
AT3G25010	RLP41	AT3G25010	-3.43959	0.0147895	Down
AT1G32450	NRT1.5	AT1G32450	-3.4237	4.11e-05	Down
AT1G77870	MUB5	AT1G77870	-3.39936	0.00459305	Down
AT4G21745	AT4G21745	AT4G21745	-3.39595	0.0402355	Down
AT3G18773	AT3G18773	AT3G18773	-3.37905	2.42e-08	Down
AT1G78440	ATGA2OX1	AT1G78440	-3.36127	0.00141727	Down
AT1G21310	EXT3	AT1G21310	-3.29031	0.00576471	Down
AT1G55960	AT1G55960	AT1G55960	-3.28988	3.47e-10	Down
AT2G25900	ATCTH	AT2G25900	-3.27816	2.28e-07	Down
AT1G53160	SPL4	AT1G53160	-3.26318	0.000118788	Down
AT1G21140	AT1G21140	AT1G21140	-3.25498	0.000996976	Down
AT5G19840	AT5G19840	AT5G19840	-3.25211	0.0415907	Down
AT3G01140	MYB106	AT3G01140	-3.24249	0.0156211	Down
AT1G12200	FMO	AT1G12200	-3.24171	0.000442149	Down
AT2G41250	AT2G41250	AT2G41250	-3.24083	2e-06	Down
AT5G25130	CYP71B12	AT5G25130	-3.24057	4.49e-07	Down
AT2G37460	UMAMIT12	AT2G37460	-3.23808	0.000181637	Down
AT1G49470	AT1G49470	AT1G49470	-3.23536	3.8e-06	Down
AT1G04220	KCS2	AT1G04220	-3.23239	7.81e-05	Down
AT2G18210	AT2G18210	AT2G18210	-3.22802	0.0047805	Down
AT2G44130	AT2G44130	AT2G44130	-3.22235	5.35e-07	Down
AT2G31160	LSH3	AT2G31160	-3.20142	0.00420888	Down
AT2G44745	WRKY12	AT2G44745	-3.15262	0.049574	Down
AT5G24660	LSU2	AT5G24660	-3.14075	1.39e-05	Down
AT5G17760	AT5G17760	AT5G17760	-3.13296	0.000135187	Down
AT3G15570	AT3G15570	AT3G15570	-3.1318	3.16e-07	Down
AT2G05380	GRP3S	AT2G05380	-3.11785	4.12e-05	Down
AT3G62070	AT3G62070	AT3G62070	-3.08659	4.98e-06	Down
AT5G18670	BMY3	AT5G18670	-3.07176	1.22e-13	Down
AT5G41900	AT5G41900	AT5G41900	-3.06995	0.000963091	Down
AT1G15550	GA3OX1	AT1G15550	-3.06398	0.00660644	Down
AT1G18880	NRT1.9	AT1G18880	-3.05911	2.83e-05	Down
AT1G29460	AT1G29460	AT1G29460	-3.03735	1.7e-06	Down
AT5G39610	NAC6	AT5G39610	-3.0275	0.047143	Down
AT5G37260	RVE2	AT5G37260	-3.02197	0.0303062	Down
AT4G37890	EDA40	AT4G37890	-3.01798	0.00969212	Down
AT2G20180	PIL5	AT2G20180	-3.00665	4.9e-16	Down
AT1G23205	AT1G23205	AT1G23205	-2.99822	0.0161605	Down
AT3G56400	WRKY70	AT3G56400	-2.99077	0.00136996	Down
AT4G37310	CYP81H1	AT4G37310	-2.97654	1.31e-10	Down
AT1G29500	AT1G29500	AT1G29500	-2.97416	0.000271004	Down
AT2G18560	AT2G18560	AT2G18560	-2.97226	3.02e-12	Down
AT1G34060	AT1G34060	AT1G34060	-2.96557	0.016906	Down
AT4G14620	AT4G14620	AT4G14620	-2.96353	7.42e-08	Down
AT1G23390	AT1G23390	AT1G23390	-2.96189	1.19e-08	Down
AT2G32010	CVL1	AT2G32010	-2.93348	3.43e-05	Down
AT5G23480	AT5G23480	AT5G23480	-2.92975	0.0353554	Down
AT5G59350	AT5G59350	AT5G59350	-2.92057	2.37e-13	Down
AT2G05160	AT2G05160	AT2G05160	-2.9154	0.00644679	Down
AT1G08570	ACHT4	AT1G08570	-2.88835	1.63e-12	Down
AT4G37100	AT4G37100	AT4G37100	-2.88229	8.18e-06	Down
AT5G03552	ath-MIR822	AT5G03552	-2.86852	0.00969212	Down
AT4G25420	GA20OX1	AT4G25420	-2.8626	0.0202399	Down
AT1G75590	AT1G75590	AT1G75590	-2.85944	0.0269693	Down
AT2G27420	AT2G27420	AT2G27420	-2.84037	0.00101166	Down
AT5G11550	AT5G11550	AT5G11550	-2.83452	5.95e-05	Down
AT5G21940	AT5G21940	AT5G21940	-2.83194	3.5e-05	Down
AT1G69780	ATHB13	AT1G69780	-2.82705	3.44e-08	Down
AT3G09450	AT3G09450	AT3G09450	-2.80267	0.000141345	Down
AT2G21260	AT2G21260	AT2G21260	-2.78711	0.0289035	Down
AT3G17640	AT3G17640	AT3G17640	-2.77608	0.00344715	Down
AT2G16750	AT2G16750	AT2G16750	-2.7486	0.000878204	Down
AT1G62350	AT1G62350	AT1G62350	-2.73226	0.0416398	Down
AT1G23010	LPR1	AT1G23010	-2.73203	0.0221768	Down
AT3G30180	BR6OX2	AT3G30180	-2.72728	4.29e-05	Down
AT3G53235	AT3G53235	AT3G53235	-2.7154	0.00447963	Down
AT1G20190	EXPA11	AT1G20190	-2.70765	0.00194647	Down
AT1G67710	ARR11	AT1G67710	-2.69187	0.0187852	Down
AT4G29905	AT4G29905	AT4G29905	-2.69099	7.31e-06	Down
AT5G40230	UMAMIT37	AT5G40230	-2.6887	0.0369129	Down
AT1G27060	AT1G27060	AT1G27060	-2.6813	0.000272107	Down
AT4G01450	UMAMIT30	AT4G01450	-2.65963	7.38e-06	Down
AT5G51670	AT5G51670	AT5G51670	-2.65936	2.5e-06	Down
AT2G39800	P5CS1	AT2G39800	-2.6457	0.000178488	Down
AT4G01460	AT4G01460	AT4G01460	-2.64296	0.00481322	Down
AT3G51860	CAX3	AT3G51860	-2.64288	0.0227742	Down
AT5G17300	RVE1	AT5G17300	-2.63019	3.85e-09	Down
AT1G71970	AT1G71970	AT1G71970	-2.6294	2.49e-05	Down
AT5G25240	AT5G25240	AT5G25240	-2.61725	0.00392397	Down
AT4G39510	CYP96A12	AT4G39510	-2.61102	0.000385968	Down
AT4G37320	CYP81D5	AT4G37320	-2.60237	1.22e-05	Down
AT1G07490	RTFL3	AT1G07490	-2.59955	0.0194767	Down
AT4G23880	AT4G23880	AT4G23880	-2.59747	0.000177033	Down
AT2G02950	PKS1	AT2G02950	-2.59675	0.000251944	Down
AT1G16830	AT1G16830	AT1G16830	-2.59612	0.0479921	Down
AT3G05345	AT3G05345	AT3G05345	-2.59229	1.31e-10	Down
AT1G34640	AT1G34640	AT1G34640	-2.58341	2.55e-08	Down
AT1G71030	MYBL2	AT1G71030	-2.58313	0.000921228	Down
AT4G28240	AT4G28240	AT4G28240	-2.57827	1.43e-05	Down
AT1G06993	AT1G06993	AT1G06993	-2.57819	0.0466757	Down
AT2G38820	AT2G38820	AT2G38820	-2.57724	1.69e-08	Down
AT5G42680	AT5G42680	AT5G42680	-2.5686	2.69e-05	Down
AT4G29190	OZF2	AT4G29190	-2.56687	0.000175715	Down
AT5G02865	AT5G02865	AT5G02865	-2.56678	0.0381923	Down
AT3G50560	AT3G50560	AT3G50560	-2.56298	1.53e-07	Down
AT1G76800	AT1G76800	AT1G76800	-2.55983	0.000252698	Down
AT5G62730	AT5G62730	AT5G62730	-2.55011	0.0230771	Down
AT5G19190	AT5G19190	AT5G19190	-2.53971	2.85e-05	Down
AT4G26950	AT4G26950	AT4G26950	-2.52822	0.00591527	Down
AT2G08220	AT2G08220	AT2G08220	-2.52212	0.00386929	Down
AT4G30110	HMA2	AT4G30110	-2.51849	0.00342397	Down
AT2G42640	AT2G42640	AT2G42640	-2.51278	0.0139664	Down
AT1G21920	AT1G21920	AT1G21920	-2.4971	1.46e-06	Down
AT4G21760	BGLU47	AT4G21760	-2.48916	0.017651	Down
AT2G18120	SRS4	AT2G18120	-2.48889	0.0328112	Down
AT1G51140	FBH3	AT1G51140	-2.48018	2.08e-13	Down
AT5G53486	AT5G53486	AT5G53486	-2.47715	0.00077281	Down
AT3G03830	SAUR28	AT3G03830	-2.47701	0.0378059	Down
AT3G48187	AT3G48187	AT3G48187	-2.4764	0.0358583	Down
AT2G43445	AT2G43445	AT2G43445	-2.47308	0.00121579	Down
AT3G28100	UMAMIT45	AT3G28100	-2.46325	0.00484004	Down
AT5G11060	KNAT4	AT5G11060	-2.46198	2.02e-07	Down
AT2G29320	AT2G29320	AT2G29320	-2.46102	0.00024455	Down
AT4G37080	AT4G37080	AT4G37080	-2.45492	1.07e-06	Down
AT1G79920	Hsp70-15	AT1G79920	-2.45212	9.69e-23	Down
AT2G20210	AT2G20210	AT2G20210	-2.44593	0.000709156	Down
AT1G23052	AT1G23052	AT1G23052	-2.43973	0.0215256	Down
AT1G07390	RLP1	AT1G07390	-2.42419	0.000862608	Down
AT5G60680	AT5G60680	AT5G60680	-2.4223	1.51e-05	Down
AT1G01520	ASG4	AT1G01520	-2.42072	0.000148203	Down
AT4G33540	AT4G33540	AT4G33540	-2.41666	0.000401785	Down
AT1G29510	SAUR68	AT1G29510	-2.41334	0.0100307	Down
AT2G41180	SIB2	AT2G41180	-2.40896	7.47e-06	Down
AT5G24655	LSU4	AT5G24655	-2.40872	0.00248561	Down
AT5G06000	EIF3G2	AT5G06000	-2.40754	0.0100043	Down
AT4G13493	ath-MIR850	AT4G13493	-2.40466	0.0422614	Down
AT3G46600	AT3G46600	AT3G46600	-2.40084	0.00348584	Down
AT3G13065	SRF4	AT3G13065	-2.39233	0.0497788	Down
AT4G19170	NCED4	AT4G19170	-2.38665	0.00790545	Down
AT1G20470	AT1G20470	AT1G20470	-2.38639	0.000174394	Down
AT1G55980	AT1G55980	AT1G55980	-2.37745	0.000729453	Down
AT5G26200	AT5G26200	AT5G26200	-2.37662	6.95e-05	Down
AT1G05870	AT1G05870	AT1G05870	-2.37162	4.41e-09	Down
AT1G36940	AT1G36940	AT1G36940	-2.37063	0.0269458	Down
AT4G23020	TRM11 AT4G23020	AT4G23020	-2.3696	0.00405376	Down
AT3G26445	AT3G26445	AT3G26445	-2.36885	0.0355293	Down
AT1G11700	AT1G11700	AT1G11700	-2.35862	0.000493499	Down
AT5G15860	PCME	AT5G15860	-2.34591	0.000178488	Down
AT4G23870	AT4G23870	AT4G23870	-2.34186	0.0019604	Down
AT1G14205	AT1G14205	AT1G14205	-2.33859	0.0339804	Down
AT5G59430	TRP1 AT5G59430	AT5G59430	-2.33809	3.58e-05	Down
AT5G24870	AT5G24870	AT5G24870	-2.33318	1.31e-06	Down
AT1G54120	AT1G54120	AT1G54120	-2.32394	0.0091003	Down
AT4G27450	AT4G27450	AT4G27450	-2.32032	0.00930305	Down
AT5G10150	AT5G10150	AT5G10150	-2.31557	5.16e-05	Down
AT5G06510	NF-YA10	AT5G06510	-2.31132	0.0092139	Down
AT5G22460	AT5G22460	AT5G22460	-2.31055	0.00305019	Down
AT1G48605	ATHAL3B	AT1G48605	-2.3105	0.00932023	Down
AT1G79060	AT1G79060	AT1G79060	-2.30771	0.000185142	Down
AT2G28200	AT2G28200	AT2G28200	-2.30569	3.44e-08	Down
AT2G37770	ChlAKR	AT2G37770	-2.30475	0.0467721	Down
AT5G06790	AT5G06790	AT5G06790	-2.29862	0.00141311	Down
AT4G24780	AT4G24780	AT4G24780	-2.29656	0.00239823	Down
AT1G33475	AT1G33475	AT1G33475	-2.29544	0.0047805	Down
AT1G13700	PGL1	AT1G13700	-2.28967	0.0135155	Down
AT5G22920	AT5G22920	AT5G22920	-2.28878	0.000861946	Down
AT2G40130	AT2G40130	AT2G40130	-2.28836	2.34e-05	Down
AT1G67050	AT1G67050	AT1G67050	-2.28792	1.46e-06	Down
AT3G26932	DRB3	AT3G26932	-2.27837	0.00507085	Down
AT2G41510	CKX1	AT2G41510	-2.27407	0.0445322	Down
AT1G80760	NIP6;1	AT1G80760	-2.27316	2.52e-05	Down
AT3G51710	AT3G51710	AT3G51710	-2.26095	0.0358059	Down
AT5G47640	NF-YB2	AT5G47640	-2.25459	2.93e-06	Down
AT3G22840	ELIP1	AT3G22840	-2.25363	0.00219706	Down
AT5G14940	AT5G14940	AT5G14940	-2.24567	0.00230541	Down
AT5G65710	HSL2	AT5G65710	-2.24359	0.000690196	Down
AT3G22970	AT3G22970	AT3G22970	-2.23867	1.55e-05	Down
AT3G52480	AT3G52480	AT3G52480	-2.23354	0.000780973	Down
AT2G45600	AT2G45600	AT2G45600	-2.22873	6.09e-05	Down
AT4G15430	AT4G15430	AT4G15430	-2.2282	1.96e-06	Down
AT1G31320	LBD4	AT1G31320	-2.21723	0.0216546	Down
AT1G10155	PP2-A10	AT1G10155	-2.21444	0.0249146	Down
AT4G39120	IMPL2	AT4G39120	-2.21177	1.83e-06	Down
AT4G22730	AT4G22730	AT4G22730	-2.21027	1.03e-06	Down
AT1G25440	BBX15	AT1G25440	-2.21001	1.85e-05	Down
AT4G01680	MYB55	AT4G01680	-2.20891	0.00393798	Down
AT3G57830	AT3G57830	AT3G57830	-2.20745	0.032122	Down
AT1G15260	AT1G15260	AT1G15260	-2.20675	5.52e-05	Down
AT1G33720	CYP76C6	AT1G33720	-2.20565	0.0376235	Down
AT4G17770	TPS5	AT4G17770	-2.2023	0.000174789	Down
AT1G75750	GASA1	AT1G75750	-2.19769	0.041625	Down
AT4G16690	MES16	AT4G16690	-2.18965	4.53e-05	Down
AT4G18260	AT4G18260	AT4G18260	-2.18006	0.0243034	Down
AT5G47910	RBOHD	AT5G47910	-2.17316	0.000198786	Down
AT3G45680	AT3G45680	AT3G45680	-2.17254	0.0479141	Down
AT5G63580	FLS2 AT5G63580	AT5G63580	-2.1679	1.78e-05	Down
AT1G10150	AT1G10150	AT1G10150	-2.16497	1.41e-06	Down
AT5G01820	SR1 AT5G01820	AT5G01820	-2.16027	1.94e-05	Down
AT2G21320	BBX18	AT2G21320	-2.15949	1.37e-06	Down
AT4G33666	AT4G33666	AT4G33666	-2.15907	0.00432031	Down
AT2G33060	RLP27	AT2G33060	-2.15677	0.00705647	Down
AT4G02520	GSTF2	AT4G02520	-2.15508	0.0129807	Down
AT3G02170	LNG2	AT3G02170	-2.15411	3.82e-05	Down
AT4G39770	TPPH	AT4G39770	-2.15366	0.000205256	Down
AT2G42610	LSH10	AT2G42610	-2.15163	9.45e-06	Down
AT5G44260	AT5G44260	AT5G44260	-2.15033	0.0260223	Down
AT2G40900	UMAMIT11	AT2G40900	-2.14782	0.00234154	Down
AT5G27780	SAUR75	AT5G27780	-2.13683	0.00870991	Down
AT3G59940	AT3G59940	AT3G59940	-2.13642	1.27e-05	Down
AT5G26230	MAKR1	AT5G26230	-2.13613	0.0125743	Down
AT2G01760	RR14	AT2G01760	-2.13403	0.000166022	Down
AT5G55620	AT5G55620	AT5G55620	-2.13401	0.000428951	Down
AT2G41170	AT2G41170	AT2G41170	-2.11865	0.00731983	Down
AT2G30424	TCL2	AT2G30424	-2.11861	0.0392753	Down
AT1G68190	BBX27	AT1G68190	-2.1186	0.00214554	Down
AT1G28660	AT1G28660	AT1G28660	-2.11823	0.0069438	Down
AT3G28080	UMAMIT47	AT3G28080	-2.11237	0.000115864	Down
AT4G04435	AT4G04435	AT4G04435	-2.11085	1.44e-06	Down
AT1G50420	SCL3	AT1G50420	-2.10859	4.22e-10	Down
AT5G66600	AT5G66600	AT5G66600	-2.10313	0.00167289	Down
AT5G56860	GNC	AT5G56860	-2.09828	8.23e-07	Down
AT4G19660	NPR4	AT4G19660	-2.09722	0.00141784	Down
AT1G49840	AT1G49840	AT1G49840	-2.09336	1.85e-05	Down
AT1G29420	AT1G29420	AT1G29420	-2.09204	0.039287	Down
AT1G28310	AT1G28310	AT1G28310	-2.08735	1.83e-07	Down
AT4G12840	AT4G12840	AT4G12840	-2.08676	9.92e-05	Down
AT4G10955	AT4G10955	AT4G10955	-2.08649	0.0333619	Down
AT5G25280	AT5G25280	AT5G25280	-2.08606	0.0056773	Down
AT4G03070	AOP1	AT4G03070	-2.08564	6.34e-06	Down
AT5G47560	TDT	AT5G47560	-2.08512	0.0035685	Down
AT3G01350	AT3G01350	AT3G01350	-2.0838	0.00352995	Down
AT4G00050	UNE10	AT4G00050	-2.08276	4.41e-05	Down
AT2G36792	AT2G36792	AT2G36792	-2.08237	0.00588836	Down
AT2G01505	CLE16	AT2G01505	-2.08153	0.00174603	Down
AT4G24790	AT4G24790	AT4G24790	-2.07741	0.000895099	Down
AT5G56100	AT5G56100	AT5G56100	-2.0684	0.000818912	Down
AT2G39560	AT2G39560	AT2G39560	-2.06666	0.0348471	Down
AT1G04770	AT1G04770	AT1G04770	-2.0663	0.00618884	Down
AT3G25670	AT3G25670	AT3G25670	-2.05908	0.0373485	Down
AT1G49130	BBX17	AT1G49130	-2.05557	0.0178814	Down
AT3G09775	AT3G09775	AT3G09775	-2.05307	0.00768015	Down
AT1G13080	CYP71B2	AT1G13080	-2.0516	5.83e-05	Down
AT2G18570	AT2G18570	AT2G18570	-2.05153	0.000112711	Down
AT2G39705	RTFL8	AT2G39705	-2.05146	0.00300037	Down
AT3G47600	MYB94	AT3G47600	-2.04715	9.23e-06	Down
AT1G80920	J8	AT1G80920	-2.04051	0.010043	Down
AT3G08165	AT3G08165	AT3G08165	-2.03631	0.000186145	Down
AT4G12390	PME1 AT4G12390	AT4G12390	-2.03599	0.000388578	Down
AT2G29300	AT2G29300	AT2G29300	-2.03276	0.00382085	Down
AT5G62430	CDF1 AT5G62430	AT5G62430	-2.03148	8.77e-07	Down
AT1G05470	CVP2	AT1G05470	-2.01819	0.0103631	Down
AT3G13000	AT3G13000	AT3G13000	-2.0053	0.00360627	Down
AT3G21870	CYCP2;1	AT3G21870	-1.99753	2.14e-05	Down
AT2G18890	AT2G18890	AT2G18890	-1.99398	0.0202738	Down
AT3G04450	AT3G04450	AT3G04450	-1.99052	0.00277073	Down
AT5G11610	AT5G11610	AT5G11610	-1.98929	0.0347999	Down
AT5G53970	TAT7	AT5G53970	-1.98557	1.4e-06	Down
AT3G13810	IDD11	AT3G13810	-1.98439	2.59e-05	Down
AT1G49010	AT1G49010	AT1G49010	-1.98366	3.7e-05	Down
AT3G56080	AT3G56080	AT3G56080	-1.98305	5.89e-05	Down
AT1G18075	ath-MIR159b	AT1G18075	-1.97817	0.0242918	Down
AT5G49740	FRO7	AT5G49740	-1.97451	0.00290345	Down
AT2G21200	AT2G21200	AT2G21200	-1.97105	0.0159084	Down
AT3G29200	CM1	AT3G29200	-1.96783	5.31e-12	Down
AT4G23990	CSLG3	AT4G23990	-1.9673	0.023967	Down
AT3G28130	UMAMIT44	AT3G28130	-1.96663	0.00017716	Down
AT3G26320	CYP71B36	AT3G26320	-1.96125	0.038319	Down
AT2G36980	AT2G36980	AT2G36980	-1.9573	0.0317559	Down
AT5G43700	ATAUX2-11	AT5G43700	-1.95211	5.09e-05	Down
AT4G36540	BEE2	AT4G36540	-1.94772	0.00727112	Down
AT4G14560	IAA1	AT4G14560	-1.94683	0.0050503	Down
AT2G43150	AT2G43150	AT2G43150	-1.93707	0.0011916	Down
AT3G06080	TBL10	AT3G06080	-1.93538	0.000100261	Down
AT5G01520	AIRP2	AT5G01520	-1.93436	0.0232082	Down
AT1G55850	CSLE1	AT1G55850	-1.92897	0.00437656	Down
AT4G38860	AT4G38860	AT4G38860	-1.9251	0.0188664	Down
AT1G01060	LHY	AT1G01060	-1.92429	5.5e-15	Down
AT5G19430	AT5G19430	AT5G19430	-1.92209	9.89e-09	Down
AT4G10150	AT4G10150	AT4G10150	-1.91962	0.0116949	Down
AT1G02380	AT1G02380	AT1G02380	-1.90991	0.00199302	Down
AT1G53450	AT1G53450	AT1G53450	-1.90725	9.38e-05	Down
AT4G11360	RHA1B	AT4G11360	-1.90561	0.006871	Down
AT2G47485	AT2G47485	AT2G47485	-1.90153	0.0135544	Down
AT5G03140	AT5G03140	AT5G03140	-1.89811	0.00076411	Down
AT4G32295	AT4G32295	AT4G32295	-1.89626	0.000547423	Down
AT1G29660	AT1G29660	AT1G29660	-1.89413	0.0420591	Down
AT5G42760	AT5G42760	AT5G42760	-1.89005	0.000653232	Down
AT1G77145	AT1G77145	AT1G77145	-1.88529	0.0460505	Down
AT2G31290	AT2G31290	AT2G31290	-1.88296	0.0080413	Down
AT4G29140	ADS1 AT4G29140	AT4G29140	-1.88292	0.00643695	Down
AT1G69440	AGO7	AT1G69440	-1.87722	0.0012485	Down
AT2G03330	AT2G03330	AT2G03330	-1.87448	1.98e-07	Down
AT1G55970	HAC4	AT1G55970	-1.86494	0.0237658	Down
AT1G29450	AT1G29450	AT1G29450	-1.86394	0.0366954	Down
AT1G11410	AT1G11410	AT1G11410	-1.8628	1.04e-06	Down
AT2G36350	AT2G36350	AT2G36350	-1.85987	0.0205723	Down
AT1G58520	AT1G58525 AT1G58520	AT1G58520	-1.85697	5.02e-05	Down
AT2G32960	PFA-DSP2	AT2G32960	-1.8564	0.00498137	Down
AT1G49430	LACS2	AT1G49430	-1.85053	0.0446027	Down
AT2G21185	AT2G21185	AT2G21185	-1.84687	0.000369569	Down
AT4G04630	AT4G04630	AT4G04630	-1.84276	0.0100607	Down
AT1G03440	AT1G03440	AT1G03440	-1.83982	4.11e-07	Down
AT2G39890	PROT1	AT2G39890	-1.83975	2.31e-09	Down
AT1G18000	AT1G18000	AT1G18000	-1.83549	2.86e-05	Down
AT2G32530	CSLB03	AT2G32530	-1.83521	0.00837402	Down
AT1G56170	NF-YC2	AT1G56170	-1.83511	1.94e-05	Down
AT1G64780	AMT1;2	AT1G64780	-1.83395	0.0173734	Down
AT5G64550	AT5G64550	AT5G64550	-1.83356	9.66e-05	Down
AT5G54250	CNGC4	AT5G54250	-1.83239	6.35e-06	Down
AT5G42750	BKI1	AT5G42750	-1.83227	8.46e-05	Down
AT2G18300	HBI1	AT2G18300	-1.83196	0.0314417	Down
AT3G14210	ESM1	AT3G14210	-1.83146	0.0291475	Down
AT3G29240	AT3G29240	AT3G29240	-1.82626	0.0108618	Down
AT1G50890	AT1G50890	AT1G50890	-1.82582	0.00315981	Down
AT1G18010	AT1G18010	AT1G18010	-1.82006	3.01e-05	Down
AT5G33280	AT5G33280	AT5G33280	-1.81844	2.03e-14	Down
AT5G61420	MYB28	AT5G61420	-1.81079	0.00173035	Down
AT4G26270	PFK3	AT4G26270	-1.81009	0.0287129	Down
AT3G10150	PAP16	AT3G10150	-1.80948	0.0173165	Down
AT3G25493	AT3G25493	AT3G25493	-1.80905	0.0040559	Down
AT1G77990	AST56	AT1G77990	-1.80826	0.0105458	Down
AT3G07310	AT3G07310	AT3G07310	-1.80402	8.16e-08	Down
AT2G39570	ACR9	AT2G39570	-1.80356	0.000472802	Down
AT1G68520	BBX14	AT1G68520	-1.80179	0.0105967	Down
AT4G23490	AT4G23490	AT4G23490	-1.80167	0.00333166	Down
AT1G55920	SERAT2;1	AT1G55920	-1.80076	0.000610321	Down
AT3G25590	AT3G25590	AT3G25590	-1.8	0.000868145	Down
AT4G19420	AT4G19420	AT4G19420	-1.79298	0.0156211	Down
AT4G14400	ACD6	AT4G14400	-1.7919	0.0194996	Down
AT5G10550	GTE2	AT5G10550	-1.79027	3.34e-06	Down
AT1G54740	AT1G54740	AT1G54740	-1.78874	0.00225077	Down
AT1G08180	AT1G08180	AT1G08180	-1.78614	0.000751428	Down
AT4G14740	AT4G14740	AT4G14740	-1.78573	0.000879951	Down
AT5G41050	AT5G41050	AT5G41050	-1.7821	0.000340479	Down
AT5G35750	HK2	AT5G35750	-1.78002	0.000174743	Down
AT4G02715	AT4G02715	AT4G02715	-1.77926	6.79e-12	Down
AT5G64490	AT5G64490	AT5G64490	-1.77752	0.0406429	Down
AT1G02300	AT1G02300	AT1G02300	-1.7775	0.00131871	Down
AT4G30980	LRL2	AT4G30980	-1.77295	0.0336993	Down
AT2G37930	AT2G37930	AT2G37930	-1.77242	0.0227875	Down
AT3G26240	AT3G26240	AT3G26240	-1.77239	5.58e-07	Down
AT4G02050	STP7	AT4G02050	-1.77058	0.0140677	Down
ATCG00750	rps11	ATCG00750	-1.77016	2.31e-09	Down
AT1G07010	SLP1	AT1G07010	-1.7675	6.89e-13	Down
AT1G07380	AT1G07380	AT1G07380	-1.76307	0.00163308	Down
ATCG00290	ATCG00290	ATCG00290	-1.76184	6.83e-05	Down
AT1G70940	PIN3	AT1G70940	-1.76067	0.00231798	Down
AT2G21560	AT2G21560	AT2G21560	-1.76019	0.00422982	Down
AT1G34630	AT1G34630	AT1G34630	-1.76007	7.68e-05	Down
AT1G62960	ACS10	AT1G62960	-1.75321	3.7e-08	Down
AT5G65683	WAVH2	AT5G65683	-1.74992	0.00628677	Down
AT4G36240	GATA7	AT4G36240	-1.74723	0.0112333	Down
AT4G31650	AT4G31650	AT4G31650	-1.74517	0.00338169	Down
AT3G15270	SPL5	AT3G15270	-1.74034	0.0393587	Down
AT2G30520	RPT2	AT2G30520	-1.73969	4.44e-06	Down
AT2G30790	PSBP-2	AT2G30790	-1.73928	0.000603359	Down
AT1G12280	SUMM2	AT1G12280	-1.73926	0.000714864	Down
AT2G18700	TPS11	AT2G18700	-1.73873	0.0466762	Down
AT1G64500	AT1G64500	AT1G64500	-1.73393	3.31e-08	Down
AT2G42300	AT2G42300	AT2G42300	-1.73383	2.33e-06	Down
AT2G39710	AT2G39710	AT2G39710	-1.73307	0.0184145	Down
AT1G29720	AT1G29720	AT1G29720	-1.72999	0.0293183	Down
AT1G33480	AT1G33480	AT1G33480	-1.724	0.0314036	Down
AT1G79520	AT1G79520	AT1G79520	-1.71702	0.000343149	Down
AT3G06520	AT3G06520	AT3G06520	-1.71622	0.0324767	Down
AT5G53370	PMEPCRF	AT5G53370	-1.71298	0.00186913	Down
AT4G15550	IAGLU	AT4G15550	-1.71184	0.0134908	Down
AT4G32980	ATH1	AT4G32980	-1.70095	0.00981916	Down
AT3G22104	AT3G22104	AT3G22104	-1.69973	5.4e-05	Down
AT5G53010	AT5G53010	AT5G53010	-1.6989	0.0151114	Down
AT1G78180	AT1G78180	AT1G78180	-1.69866	6.79e-06	Down
AT3G60220	ATL4	AT3G60220	-1.69574	0.0426973	Down
ATCG00720	petB	ATCG00720	-1.69541	5.34e-05	Down
AT2G28350	ARF10	AT2G28350	-1.69537	0.00457208	Down
AT2G41370	BOP2	AT2G41370	-1.69493	0.0047805	Down
AT1G49180	AT1G49180	AT1G49180	-1.69426	0.00283539	Down
AT1G26800	AT1G26800	AT1G26800	-1.69127	0.0357509	Down
AT5G12900	AT5G12900	AT5G12900	-1.69033	0.00200157	Down
AT5G59960	AT5G59960	AT5G59960	-1.68975	5.06e-05	Down
AT1G33400	TPR9	AT1G33400	-1.68452	0.000150685	Down
AT1G72820	AT1G72820	AT1G72820	-1.68417	1.2e-10	Down
AT1G74840	AT1G74840	AT1G74840	-1.68216	2.68e-13	Down
AT2G32540	CSLB04	AT2G32540	-1.6766	7.04e-05	Down
AT2G03310	AT2G03310	AT2G03310	-1.67658	0.0352813	Down
AT1G14200	AT1G14200	AT1G14200	-1.67317	0.0473982	Down
AT2G28260	CNGC15	AT2G28260	-1.6728	0.0272108	Down
AT5G24850	CRY3	AT5G24850	-1.66925	0.000381971	Down
AT1G48300	DGAT3	AT1G48300	-1.66707	0.0195791	Down
AT3G05936	AT3G05936	AT3G05936	-1.66072	0.00289499	Down
AT1G15740	AT1G15740	AT1G15740	-1.65969	0.00939591	Down
AT1G68585	AT1G68585	AT1G68585	-1.65968	0.00364547	Down
AT4G38960	BBX19	AT4G38960	-1.65863	1.69e-08	Down
AT1G15215	SHH1	AT1G15215	-1.65466	0.000514302	Down
AT5G47810	PFK2	AT5G47810	-1.65422	0.0341675	Down
AT5G54145	AT5G54145	AT5G54145	-1.6536	0.00638076	Down
AT2G34620	AT2G34620	AT2G34620	-1.65142	0.0458258	Down
AT5G67385	AT5G67385	AT5G67385	-1.64852	5.1e-05	Down
AT2G32710	AT2G32710	AT2G32710	-1.64774	3.78e-06	Down
AT3G15354	SPA3	AT3G15354	-1.64303	4.39e-12	Down
AT5G62100	BAG2	AT5G62100	-1.64072	0.00342877	Down
AT3G10420	SPD1	AT3G10420	-1.64044	0.00911592	Down
AT1G10740	AT1G10740	AT1G10740	-1.64015	1.3e-10	Down
AT5G43860	CLH2	AT5G43860	-1.63842	0.0202529	Down
AT1G07570	APK1A	AT1G07570	-1.63717	0.00166822	Down
AT4G37560	AT4G37560	AT4G37560	-1.63232	1.91e-06	Down
AT1G09710	AT1G09710	AT1G09710	-1.63206	0.0164237	Down
AT4G00755	AT4G00755	AT4G00755	-1.63196	0.000727111	Down
AT1G64400	LACS3	AT1G64400	-1.62643	0.000606985	Down
AT3G50630	KRP2	AT3G50630	-1.62608	0.0108605	Down
AT3G13510	AT3G13510	AT3G13510	-1.62465	0.0197595	Down
[truncated: 483 more rows]

## Sheet: rbohF_vs_Col-0
User_ID	symbol	ensembl_ID	rbohFMock-Col0Mock_log2FC	rbohFMock-Col0Mock_adjPval	Direction
AT1G70440	SRO3	AT1G70440	41.9982	5.37e-76	Up
AT2G18190	AT2G18190	AT2G18190	34.4248	4.82e-41	Up
AT1G33730	CYP76C5	AT1G33730	15.5813	3.78e-07	Up
AT2G38240	AT2G38240	AT2G38240	9.34168	3.31e-12	Up
AT3G27809	AT3G27809	AT3G27809	8.68897	0.000327889	Up
AT4G11320	AT4G11320	AT4G11320	8.65447	4.95e-11	Up
AT5G62360	AT5G62360	AT5G62360	8.49076	8.53e-10	Up
AT3G11480	BSMT1	AT3G11480	8.14434	1.5e-10	Up
AT5G38700	AT5G38700	AT5G38700	7.66753	0.000142475	Up
AT5G40348	AT5G40348	AT5G40348	7.6634	0.00102777	Up
AT1G32910	AT1G32910	AT1G32910	7.61634	0.00144085	Up
AT5G24780	VSP1	AT5G24780	7.55169	2.14e-12	Up
AT5G10625	AT5G10625	AT5G10625	7.28965	1.98e-12	Up
AT3G28300	AT14A AT3G28300	AT3G28300	7.19432	1.23e-08	Up
AT3G28290	AT14A AT3G28290	AT3G28290	7.19369	1.23e-08	Up
AT2G24210	TPS10 AT2G24210	AT2G24210	7.08861	1.42e-15	Up
AT1G19320	AT1G19320	AT1G19320	7.04826	0.000208241	Up
AT4G01380	AT4G01380	AT4G01380	7.03627	0.000603244	Up
AT1G76790	IGMT5	AT1G76790	7.03016	1.06e-11	Up
AT4G37410	CYP81F4	AT4G37410	6.98075	0.00085818	Up
AT4G21830	MSRB7	AT4G21830	6.89376	0.00141864	Up
AT5G19110	AT5G19110	AT5G19110	6.72107	1.89e-06	Up
AT1G43160	RAP2.6	AT1G43160	6.61071	6.96e-06	Up
AT2G18196	AT2G18196	AT2G18196	6.56602	0.000101121	Up
AT1G54020	AT1G54020	AT1G54020	6.47405	1.8e-06	Up
AT2G47950	AT2G47950	AT2G47950	6.45682	0.000564985	Up
AT1G77520	AT1G77520	AT1G77520	6.4496	8.39e-05	Up
AT3G27415	AT3G27415	AT3G27415	6.25246	8.93e-05	Up
AT3G28740	CYP81D11	AT3G28740	6.23081	0.00032501	Up
AT5G41590	AT5G41590	AT5G41590	6.22499	0.00645109	Up
AT4G11911	AT4G11911	AT4G11911	6.21434	4.93e-06	Up
AT5G59580	UGT76E1	AT5G59580	6.19219	8.28e-06	Up
AT5G15960	KIN1	AT5G15960	6.18449	1.62e-08	Up
AT5G36907	AT5G36907	AT5G36907	6.17921	0.00331349	Up
AT4G01390	AT4G01390	AT4G01390	6.11393	0.0094298	Up
AT4G10290	AT4G10290	AT4G10290	6.02903	0.000398256	Up
AT5G07010	ST2A	AT5G07010	6.02065	2.35e-07	Up
AT1G52400	BGLU18	AT1G52400	6.00899	1.62e-12	Up
AT4G25100	FSD1	AT4G25100	5.94575	2.1e-05	Up
AT5G10140	FLC	AT5G10140	5.92586	0.0102636	Up
AT1G25422	AT1G25422	AT1G25422	5.8974	3.88e-06	Up
AT1G30135	JAZ8	AT1G30135	5.8716	6.07e-07	Up
AT4G11310	AT4G11310	AT4G11310	5.87065	0.0121372	Up
AT4G34210	SK11	AT4G34210	5.78716	0.0090725	Up
AT5G19100	AT5G19100	AT5G19100	5.77262	0.0233974	Up
AT5G35110	AT5G35110	AT5G35110	5.75186	0.000361917	Up
AT3G48520	CYP94B3	AT3G48520	5.69869	5.23e-05	Up
AT4G15200	FH3	AT4G15200	5.68588	1.58e-05	Up
AT1G79310	MC7	AT1G79310	5.67947	0.00394428	Up
AT5G24770	VSP2	AT5G24770	5.63194	1.2e-10	Up
AT4G30650	AT4G30650	AT4G30650	5.62219	2.73e-12	Up
AT4G35655	AT4G35655	AT4G35655	5.60648	0.016484	Up
AT4G24110	AT4G24110	AT4G24110	5.57414	0.000281731	Up
AT3G55970	JRG21	AT3G55970	5.57036	2.62e-07	Up
AT1G68290	ENDO2	AT1G68290	5.56637	0.000113006	Up
AT5G67310	CYP81G1	AT5G67310	5.50092	0.00211697	Up
AT1G19210	AT1G19210	AT1G19210	5.50006	0.00559244	Up
AT1G52040	MBP1	AT1G52040	5.46526	1.3e-05	Up
AT5G62520	SRO5	AT5G62520	5.45514	2.34e-05	Up
AT1G56300	AT1G56300	AT1G56300	5.45143	2.21e-10	Up
AT1G54010	AT1G54010	AT1G54010	5.42596	1.18e-10	Up
AT1G70130	AT1G70130	AT1G70130	5.39058	0.012949	Up
AT4G27654	AT4G27654	AT4G27654	5.38866	3.73e-06	Up
AT4G09135	U6.6	AT4G09135	5.38847	0.00203054	Up
AT3G25180	CYP82G1	AT3G25180	5.38699	0.00191959	Up
AT1G24070	CSLA10	AT1G24070	5.36512	9.04e-08	Up
AT1G72260	THI2.1	AT1G72260	5.35817	0.0411073	Up
AT4G16740	TPS03	AT4G16740	5.30602	0.0159297	Up
AT2G30830	AT2G30830	AT2G30830	5.29136	0.00125827	Up
AT2G42540	COR15A	AT2G42540	5.28903	3.37e-14	Up
AT4G16590	CSLA01	AT4G16590	5.27206	1.26e-06	Up
AT3G51450	AT3G51450	AT3G51450	5.20452	1.65e-12	Up
AT4G25433	AT4G25433	AT4G25433	5.1937	1.17e-06	Up
AT1G52410	TSA1 AT1G52410	AT1G52410	5.1611	1.14e-15	Up
AT4G17470	AT4G17470	AT4G17470	5.15665	2.99e-09	Up
AT2G07758	AT2G07758	AT2G07758	5.14532	0.00190057	Up
ATMG00250	ATMG00250	ATMG00250	5.14532	0.00190057	Up
AT1G14120	AT1G14120	AT1G14120	5.10462	0.00054913	Up
AT2G39030	NATA1	AT2G39030	5.09889	2.71e-05	Up
AT5G42800	DFR	AT5G42800	5.07905	0.0334278	Up
AT1G68825	RTFL15	AT1G68825	5.07573	0.0144259	Up
AT1G54095	AT1G54095	AT1G54095	5.06919	0.00996885	Up
AT4G13860	AT4G13860	AT4G13860	5.03071	1.45e-05	Up
AT5G38120	4CL8	AT5G38120	4.99842	1.05e-06	Up
AT4G28556	RIC7 AT4G28556	AT4G28556	4.93457	0.00435532	Up
AT4G35160	AT4G35160	AT4G35160	4.92199	0.00110155	Up
AT2G39330	JAL23	AT2G39330	4.92137	9.3e-08	Up
AT1G53903	AT1G53903 AT1G53903	AT1G53903	4.92126	1.5e-07	Up
AT1G53885	AT1G53903 AT1G53885	AT1G53885	4.92054	1.5e-07	Up
AT2G20825	ULT2	AT2G20825	4.9022	0.0310111	Up
AT4G15210	BAM5	AT4G15210	4.88106	3.78e-07	Up
AT5G64750	ABR1	AT5G64750	4.88097	0.00163213	Up
AT5G01760	AT5G01760	AT5G01760	4.87253	0.000812082	Up
AT4G02360	AT4G02360	AT4G02360	4.86664	2.33e-09	Up
AT1G44350	ILL6	AT1G44350	4.86369	1.77e-10	Up
AT5G17540	AT5G17540	AT5G17540	4.85121	0.0268299	Up
AT1G76640	AT1G76640	AT1G76640	4.84799	0.0321839	Up
AT4G21213	AT4G21213	AT4G21213	4.83524	2.61e-08	Up
ATCG01180	ATCG01180	ATCG01180	4.82597	6.28e-13	Up
ATCG00950	ATCG00950	ATCG00950	4.82582	6.28e-13	Up
ATCG00630	psaJ	ATCG00630	4.81983	2.2e-16	Up
AT5G63450	CYP94B1	AT5G63450	4.80511	0.0019872	Up
AT5G05600	AT5G05600	AT5G05600	4.78684	2.58e-07	Up
AT3G48450	AT3G48450	AT3G48450	4.77258	5.67e-05	Up
AT5G09495	AT5G09495	AT5G09495	4.7433	0.00668974	Up
AT3G28220	AT3G28220	AT3G28220	4.73523	8.03e-07	Up
AT3G16470	JR1	AT3G16470	4.73171	1.42e-15	Up
AT3G02795	AT3G02795	AT3G02795	4.72774	0.00796586	Up
AT3G59220	PRN	AT3G59220	4.70911	1.2e-06	Up
AT5G24290	MEB2	AT5G24290	4.66141	0.000282814	Up
AT4G27950	CRF4	AT4G27950	4.65758	7.12e-05	Up
AT3G60010	SK13 AT3G60010	AT3G60010	4.65755	0.0171258	Up
AT3G12145	FLR1	AT3G12145	4.64142	2.28e-08	Up
AT1G16370	OCT6	AT1G16370	4.61101	4.49e-07	Up
AT1G29540	AT1G29540	AT1G29540	4.58807	0.000265305	Up
AT1G48000	MYB112	AT1G48000	4.58398	0.0236083	Up
AT2G32510	MAPKKK17	AT2G32510	4.58269	2.64e-05	Up
AT1G70640	AT1G70640	AT1G70640	4.57531	0.000688254	Up
AT1G10770	AT1G10770	AT1G10770	4.57193	0.0402351	Up
AT2G17660	AT2G17660	AT2G17660	4.53823	0.000279581	Up
AT5G13220	JAZ10	AT5G13220	4.52965	8.4e-06	Up
AT2G02990	RNS1	AT2G02990	4.52824	0.00117989	Up
ATCG00060	ATCG00060	ATCG00060	4.52088	0.0160347	Up
AT1G05420	OFP12	AT1G05420	4.51159	0.000137093	Up
AT4G39950	CYP79B2	AT4G39950	4.46543	9.88e-07	Up
AT4G29930	AT4G29930	AT4G29930	4.46534	0.000731597	Up
AT1G22570	AT1G22570	AT1G22570	4.46376	0.000121616	Up
AT1G51090	AT1G51090	AT1G51090	4.45397	6.52e-08	Up
AT4G34410	RRTF1	AT4G34410	4.45242	0.00167881	Up
AT5G60730	AT5G60730	AT5G60730	4.43841	0.00289327	Up
AT1G52720	AT1G52720	AT1G52720	4.42683	1.46e-17	Up
AT1G04907	U1.10	AT1G04907	4.41606	0.00790157	Up
AT1G12610	DDF1	AT1G12610	4.41181	0.00287813	Up
AT1G61120	TPS04	AT1G61120	4.39577	0.012865	Up
AT3G07045	AT3G07045	AT3G07045	4.36751	0.000352339	Up
AT3G20760	AT3G20760	AT3G20760	4.35187	3.2e-06	Up
AT3G61920	AT3G61920	AT3G61920	4.35097	0.00122215	Up
AT3G43250	AT3G43250	AT3G43250	4.33522	0.0283931	Up
AT5G61890	AT5G61890	AT5G61890	4.33325	0.0139796	Up
AT2G42530	COR15B	AT2G42530	4.33279	7.97e-12	Up
AT5G03204	AT5G03204	AT5G03204	4.32931	0.00555769	Up
AT2G43550	AT2G43550	AT2G43550	4.32299	1.65e-12	Up
AT3G25770	AOC2	AT3G25770	4.30665	3.78e-10	Up
AT1G72140	AT1G72140	AT1G72140	4.2979	0.0262236	Up
AT4G12050	AT4G12050	AT4G12050	4.27964	0.016565	Up
AT2G22330	CYP79B3	AT2G22330	4.27648	2.93e-11	Up
AT1G73325	AT1G73325	AT1G73325	4.27088	3.57e-06	Up
AT5G02675	AT5G02675	AT5G02675	4.24857	0.012836	Up
AT1G52000	AT1G52000	AT1G52000	4.23255	9.75e-08	Up
AT1G51780	ILL5	AT1G51780	4.20025	0.00691432	Up
AT5G41120	AT5G41120	AT5G41120	4.1826	1.84e-10	Up
AT1G07887	AT1G07887	AT1G07887	4.18215	0.0119422	Up
AT4G36010	AT4G36010	AT4G36010	4.17136	6.36e-07	Up
AT2G39518	AT2G39518	AT2G39518	4.15522	0.045688	Up
AT1G73300	scpl2	AT1G73300	4.14505	0.0193579	Up
AT4G22880	LDOX	AT4G22880	4.14087	0.0401876	Up
AT5G15970	KIN2	AT5G15970	4.11858	2.87e-10	Up
AT1G15010	AT1G15010	AT1G15010	4.11234	1.9e-06	Up
AT3G26330	CYP71B37	AT3G26330	4.10835	0.0251359	Up
AT2G21510	AT2G21510	AT2G21510	4.1008	0.0248062	Up
AT1G06620	AT1G06620	AT1G06620	4.06032	8.61e-06	Up
AT3G50970	LTI30	AT3G50970	4.03958	8.63e-05	Up
AT5G23830	AT5G23830	AT5G23830	3.99793	0.0353257	Up
AT5G06570	AT5G06570	AT5G06570	3.99772	0.000224671	Up
AT4G23600	CORI3	AT4G23600	3.99686	9.18e-08	Up
AT5G07745	AT5G07745	AT5G07745	3.99671	0.0283549	Up
AT1G20030	AT1G20030	AT1G20030	3.96988	4.17e-08	Up
AT3G23250	MYB15	AT3G23250	3.95604	0.00324605	Up
AT4G29690	AT4G29690	AT4G29690	3.95179	0.0342228	Up
AT5G17460	AT5G17460	AT5G17460	3.951	6.34e-06	Up
AT2G17840	ERD7	AT2G17840	3.92925	8.67e-07	Up
AT3G25760	AOC1	AT3G25760	3.92795	0.000178415	Up
AT1G52030	MBP2	AT1G52030	3.91064	0.010071	Up
AT2G22860	PSK2	AT2G22860	3.91026	1.81e-06	Up
AT1G08113	AT1G08113	AT1G08113	3.90067	0.0119374	Up
AT2G01610	AT2G01610	AT2G01610	3.89804	4.99e-06	Up
AT2G24850	TAT3	AT2G24850	3.89462	0.000539324	Up
AT4G13410	ATCSLA15	AT4G13410	3.89442	3.59e-05	Up
AT2G29440	GSTU6	AT2G29440	3.88954	9.6e-07	Up
AT5G42650	AOS	AT5G42650	3.88873	1.2e-08	Up
AT5G52310	LTI78	AT5G52310	3.88441	4.22e-05	Up
AT5G10300	MES5	AT5G10300	3.87934	2.2e-08	Up
AT5G53290	CRF3	AT5G53290	3.87898	3.67e-05	Up
AT2G06050	OPR3	AT2G06050	3.85419	7.21e-07	Up
AT2G07659	AT2G07659	AT2G07659	3.85366	0.0235909	Up
AT1G09350	GolS3	AT1G09350	3.84668	0.00401483	Up
AT1G77380	AAP3	AT1G77380	3.83573	0.0376795	Up
AT3G47380	AT3G47380	AT3G47380	3.82594	0.000309127	Up
AT4G30660	AT4G30660	AT4G30660	3.81712	7.89e-17	Up
AT3G27510	AT3G27510	AT3G27510	3.8166	0.0378186	Up
AT5G58180	ATYKT62	AT5G58180	3.81505	0.0498674	Up
AT2G34930	AT2G34930	AT2G34930	3.80889	5.14e-06	Up
AT2G27690	CYP94C1	AT2G27690	3.80401	0.00201771	Up
AT1G02460	AT1G02460	AT1G02460	3.80178	6.85e-07	Up
AT5G67210	IRX15-L	AT5G67210	3.80004	2.43e-07	Up
AT5G38710	AT5G38710	AT5G38710	3.78293	0.00183186	Up
AT4G36950	MAPKKK21	AT4G36950	3.78212	0.024827	Up
AT5G02325	AT5G02325	AT5G02325	3.77925	0.0130521	Up
AT1G62975	AT1G62975	AT1G62975	3.76301	3.66e-05	Up
AT4G35630	PSAT	AT4G35630	3.7453	2.3e-14	Up
AT5G28237	AT5G28237	AT5G28237	3.74016	0.0238566	Up
AT2G45940	AT2G45940	AT2G45940	3.73713	0.00458299	Up
AT5G06825	AT5G06825	AT5G06825	3.7229	0.0008826	Up
AT5G01505	AT5G01505	AT5G01505	3.70795	0.015771	Up
AT1G19190	AT1G19190	AT1G19190	3.70532	0.032016	Up
AT1G31690	AT1G31690	AT1G31690	3.6986	0.0293744	Up
AT5G65300	AT5G65300	AT5G65300	3.68616	0.00197031	Up
AT1G19565	AT1G19565	AT1G19565	3.66886	0.0316033	Up
AT4G27860	MEB1	AT4G27860	3.66093	5.09e-05	Up
AT2G36380	ABCG34	AT2G36380	3.65633	5.67e-12	Up
AT3G10300	AT3G10300	AT3G10300	3.60785	3.85e-13	Up
AT3G15720	AT3G15720	AT3G15720	3.60609	4.14e-05	Up
AT5G65280	GCL1	AT5G65280	3.60312	1.81e-09	Up
AT2G46370	JAR1	AT2G46370	3.59443	7.27e-12	Up
AT1G51760	IAR3	AT1G51760	3.58946	1.15e-09	Up
AT4G11140	CRF1	AT4G11140	3.58344	0.000810892	Up
AT5G18540	AT5G18540	AT5G18540	3.58104	3.12e-06	Up
AT3G45140	LOX2	AT3G45140	3.57503	1.14e-09	Up
AT2G36590	ProT3	AT2G36590	3.57168	3.2e-06	Up
AT5G38130	AT5G38130	AT5G38130	3.56706	0.000675895	Up
AT1G05950	AT1G05950	AT1G05950	3.56559	0.0365587	Up
AT4G34590	GBF6	AT4G34590	3.56213	1.85e-10	Up
AT4G24340	AT4G24340	AT4G24340	3.55418	0.00786177	Up
AT2G22770	NAI1	AT2G22770	3.54993	0.000995706	Up
AT1G19570	DHAR1	AT1G19570	3.54245	5.37e-10	Up
AT3G27620	AOX1C	AT3G27620	3.54065	0.0433903	Up
AT2G47180	GolS1	AT2G47180	3.53326	1.71e-10	Up
AT5G21960	AT5G21960	AT5G21960	3.53038	0.0107551	Up
AT1G24090	AT1G24090	AT1G24090	3.50742	3.88e-06	Up
AT4G34710	ADC2	AT4G34710	3.49502	3.16e-08	Up
AT4G08755	U6.5	AT4G08755	3.49391	1.81e-08	Up
AT3G59750	AT3G59750	AT3G59750	3.48903	0.0230717	Up
ATCG00690	psbT	ATCG00690	3.48865	3.68e-06	Up
AT4G31110	AT4G31110	AT4G31110	3.47225	0.0124147	Up
AT3G51660	AT3G51660	AT3G51660	3.46646	9e-06	Up
AT4G39980	DHS1	AT4G39980	3.4346	3.24e-11	Up
AT3G15950	NAI2	AT3G15950	3.43362	0.00491902	Up
AT2G28900	OEP16-1	AT2G28900	3.42404	9.38e-12	Up
AT2G43520	TI2	AT2G43520	3.42397	0.000119637	Up
AT4G01360	BPS3	AT4G01360	3.41503	0.0121904	Up
AT4G18440	AT4G18440	AT4G18440	3.41124	6.92e-07	Up
AT1G52890	NAC019	AT1G52890	3.41101	0.00158031	Up
AT5G24420	PGL5	AT5G24420	3.40677	2.36e-07	Up
AT5G41315	GL3	AT5G41315	3.40483	8.22e-05	Up
AT4G29700	AT4G29700	AT4G29700	3.40367	2.82e-05	Up
AT2G43535	AT2G43535	AT2G43535	3.40154	2.94e-10	Up
AT5G07660	SMC6A	AT5G07660	3.39762	0.0169074	Up
AT1G17420	LOX3	AT1G17420	3.39297	0.000364743	Up
AT1G14250	AT1G14250	AT1G14250	3.38575	6.03e-05	Up
AT1G06002	AT1G06002	AT1G06002	3.37862	4.13e-10	Up
AT2G02010	GAD4	AT2G02010	3.37471	0.0120495	Up
AT1G20015	AT1G20015	AT1G20015	3.36884	0.0120115	Up
AT2G35384	AT2G35384	AT2G35384	3.35643	0.00146918	Up
AT3G22275	AT3G22275	AT3G22275	3.35518	0.0279838	Up
AT2G43530	AT2G43530	AT2G43530	3.3316	2.6e-10	Up
AT2G40080	ELF4	AT2G40080	3.31671	0.0235909	Up
AT5G17490	RGL3	AT5G17490	3.31104	0.000137343	Up
AT4G28560	RIC7 AT4G28560	AT4G28560	3.30774	0.00342571	Up
AT4G13395	RTFL12	AT4G13395	3.29314	0.00470646	Up
AT1G01810	AT1G01810	AT1G01810	3.29309	0.00103838	Up
AT3G15357	AT3G15357	AT3G15357	3.28993	0.00762214	Up
AT5G23820	AT5G23820	AT5G23820	3.28955	8.34e-06	Up
AT5G09980	PROPEP4	AT5G09980	3.26892	3.93e-06	Up
ATCG01270	ycf15-A ATCG01270	ATCG01270	3.25794	0.000196393	Up
ATCG00870	ycf15-A ATCG00870	ATCG00870	3.25794	0.000196431	Up
AT4G25490	CBF1	AT4G25490	3.25787	0.008735	Up
AT5G49525	AT5G49525	AT5G49525	3.25233	0.000990451	Up
AT3G16330	AT3G16330	AT3G16330	3.25224	7.69e-06	Up
AT2G37620	ACT1	AT2G37620	3.24844	1.57e-21	Up
AT4G25470	CBF2	AT4G25470	3.24736	0.00197256	Up
AT1G19550	AT1G19550	AT1G19550	3.24121	1.23e-08	Up
AT3G03480	CHAT	AT3G03480	3.23793	8.38e-05	Up
AT1G61800	GPT2	AT1G61800	3.23591	0.000546414	Up
AT5G23660	SWEET12	AT5G23660	3.23478	0.000102482	Up
AT4G27560	AT4G27560	AT4G27560	3.23145	1.64e-09	Up
ATCG00310	ATCG00310	ATCG00310	3.22121	1.63e-11	Up
AT2G38750	ANNAT4	AT2G38750	3.21869	2.2e-06	Up
AT5G62350	AT5G62350	AT5G62350	3.20435	2.64e-09	Up
AT2G43510	TI1	AT2G43510	3.19843	0.00118969	Up
AT2G37580	AT2G37580	AT2G37580	3.1984	1.35e-10	Up
AT1G64220	TOM7-2	AT1G64220	3.19232	0.00017121	Up
AT3G16400	NSP1	AT3G16400	3.19097	2.71e-11	Up
AT1G19670	CLH1	AT1G19670	3.18873	6.34e-06	Up
AT4G27530	AT4G27530	AT4G27530	3.18495	0.0303075	Up
AT4G25480	DREB1A	AT4G25480	3.18093	2.64e-05	Up
AT5G60890	MYB34	AT5G60890	3.1709	3.39e-09	Up
AT4G06705	AT4G06705	AT4G06705	3.16326	4.15e-06	Up
AT4G27652	AT4G27652	AT4G27652	3.15369	0.000127277	Up
AT2G23010	SCPL9	AT2G23010	3.15348	0.00015446	Up
AT5G01165	AT5G01165	AT5G01165	3.15211	0.000676518	Up
AT5G61280	AT5G61280	AT5G61280	3.13748	0.00657116	Up
AT5G06845	AT5G06845	AT5G06845	3.13636	5.03e-07	Up
ATCG01210	ATCG01210	ATCG01210	3.12729	0.00752741	Up
AT5G00765	AT5G00765	AT5G00765	3.12579	0.0050234	Up
ATCG00920	ATCG00920	ATCG00920	3.12544	0.00757569	Up
AT2G46240	BAG6	AT2G46240	3.11344	9.23e-06	Up
AT5G15022	AT5G15022	AT5G15022	3.09428	0.00840474	Up
AT4G29610	AT4G29610	AT4G29610	3.08146	0.00264992	Up
AT1G64200	VHA-E3	AT1G64200	3.07892	4.75e-15	Up
AT4G00305	AT4G00305	AT4G00305	3.07844	0.0197008	Up
AT4G24350	AT4G24350	AT4G24350	3.07135	1.5e-07	Up
AT5G67620	AT5G67620	AT5G67620	3.06295	0.00383624	Up
AT2G20340	AAS	AT2G20340	3.06139	1.99e-06	Up
AT2G31360	ADS2	AT2G31360	3.04801	4.16e-13	Up
AT2G39200	MLO12	AT2G39200	3.03957	0.0138686	Up
AT1G76650	CML38	AT1G76650	3.0392	0.0125928	Up
AT3G16870	GATA17	AT3G16870	3.03172	1.5e-05	Up
AT4G21910	AT4G21910	AT4G21910	3.02944	3.29e-09	Up
ATCG00960	ATCG00960	ATCG00960	3.02644	2.62e-07	Up
ATCG01170	ATCG01170	ATCG01170	3.0242	2.63e-07	Up
AT3G16860	COBL8	AT3G16860	3.00594	0.000453156	Up
AT5G05730	ASA1	AT5G05730	3.00379	4.02e-06	Up
AT1G53480	MRD1	AT1G53480	2.99988	0.00272447	Up
AT1G09950	RAS1	AT1G09950	2.99919	0.00615682	Up
AT1G06537	AT1G06537	AT1G06537	2.99865	5.35e-09	Up
ATCG00320	ATCG00320	ATCG00320	2.99823	0.00627695	Up
AT3G05130	AT3G05130	AT3G05130	2.99278	0.00177249	Up
AT1G17380	JAZ5	AT1G17380	2.98997	0.00316998	Up
AT4G04840	MSRB6	AT4G04840	2.98696	0.000286588	Up
AT3G53232	RTFL1	AT3G53232	2.98601	3.04e-05	Up
AT2G04400	AT2G04400	AT2G04400	2.97753	1.28e-12	Up
AT4G18980	AtS40-3	AT4G18980	2.96672	0.0462352	Up
AT1G16850	AT1G16850	AT1G16850	2.9593	0.000574115	Up
AT5G03210	DIP2	AT5G03210	2.9583	0.0299777	Up
AT4G21850	MSRB9	AT4G21850	2.93003	0.0112826	Up
AT4G20970	AT4G20970	AT4G20970	2.91898	0.0103136	Up
AT2G34600	JAZ7	AT2G34600	2.91696	0.0420365	Up
AT1G19180	JAZ1	AT1G19180	2.90929	0.00266355	Up
AT1G61610	AT1G61610	AT1G61610	2.90749	0.00389301	Up
AT1G04263	U5.6	AT1G04263	2.89335	0.028802	Up
AT1G51380	AT1G51380	AT1G51380	2.88912	0.00488862	Up
AT2G42760	AT2G42760	AT2G42760	2.88704	0.000259012	Up
ATMG01020	ATMG01020	ATMG01020	2.88634	0.0192584	Up
AT3G54640	TSA1 AT3G54640	AT3G54640	2.86959	3e-12	Up
AT1G06553	AT1G06553	AT1G06553	2.86729	2.94e-06	Up
AT5G49015	AT5G49015	AT5G49015	2.86328	4.7e-05	Up
AT1G19640	JMT	AT1G19640	2.85938	7.64e-06	Up
AT2G35387	AT2G35387	AT2G35387	2.85824	0.000717287	Up
AT3G55760	AT3G55760	AT3G55760	2.85479	1.19e-10	Up
AT1G10530	AT1G10530	AT1G10530	2.85354	0.0110661	Up
AT3G27210	AT3G27210	AT3G27210	2.83945	0.00110504	Up
AT5G64572	AT5G64572	AT5G64572	2.83393	0.000155302	Up
AT3G59820	LETM1	AT3G59820	2.83219	0.00183255	Up
AT5G46590	NAC096	AT5G46590	2.81724	0.00285052	Up
AT5G59510	RTFL5	AT5G59510	2.81677	0.00863095	Up
ATCG00760	rpl36	ATCG00760	2.81539	4.06e-06	Up
AT1G06463	AT1G06463	AT1G06463	2.80842	0.00572683	Up
AT3G05890	RCI2B	AT3G05890	2.80005	0.000601818	Up
AT2G35343	AT2G35343	AT2G35343	2.78934	0.000112071	Up
ATCG00370	ATCG00370	ATCG00370	2.78349	0.0427195	Up
AT2G06995	AT2G06995	AT2G06995	2.78212	0.00297337	Up
AT5G52120	PP2-A14	AT5G52120	2.77504	0.00063817	Up
AT5G13330	Rap2.6L	AT5G13330	2.77476	0.0277797	Up
AT5G41080	GDPD2	AT5G41080	2.7641	0.0387569	Up
AT3G04010	AT3G04010	AT3G04010	2.75269	0.00645196	Up
AT1G19540	AT1G19540	AT1G19540	2.74578	0.00097193	Up
AT5G02940	AT5G02940	AT5G02940	2.74567	1.76e-14	Up
AT3G16420	PBP1 AT3G16420	AT3G16420	2.7407	0.0175182	Up
AT3G25730	EDF3	AT3G25730	2.73781	0.00589706	Up
AT1G32640	MYC2	AT1G32640	2.73751	4.57e-06	Up
AT4G17610	AT4G17610	AT4G17610	2.73105	0.000364005	Up
AT2G07765	AT2G07765	AT2G07765	2.71308	0.0249199	Up
AT2G38400	AGT3	AT2G38400	2.71213	0.000134136	Up
AT5G64560	MGT9	AT5G64560	2.71015	3.94e-20	Up
ATCG00970	ATCG00970	ATCG00970	2.7098	3.15e-06	Up
ATCG01160	ATCG01160	ATCG01160	2.70952	3.15e-06	Up
AT2G07751	AT2G07751 AT2G07751	AT2G07751	2.7087	5.5e-11	Up
AT5G19230	AT5G19230	AT5G19230	2.70083	0.00392821	Up
AT4G06795	AT4G06795	AT4G06795	2.70043	0.000884725	Up
AT4G01575	AT4G01575	AT4G01575	2.70028	0.00141912	Up
AT5G39330	AT5G39330	AT5G39330	2.6959	0.0402044	Up
AT5G24920	GDU5	AT5G24920	2.68881	0.0138453	Up
AT1G72210	AT1G72210	AT1G72210	2.68739	0.000826806	Up
ATCG01120	rps15	ATCG01120	2.68579	5.68e-10	Up
AT2G23120	AT2G23120	AT2G23120	2.68537	6.2e-08	Up
AT3G25780	AOC3	AT3G25780	2.68454	0.0133826	Up
AT5G15510	AT5G15510	AT5G15510	2.6845	0.00482945	Up
AT2G44840	ERF13	AT2G44840	2.68263	0.0469078	Up
ATMG00990	AT2G07751 ATMG00990	ATMG00990	2.6824	2.39e-10	Up
AT3G23870	AT3G23870	AT3G23870	2.66497	0.00875126	Up
AT3G63060	EDL3	AT3G63060	2.66416	0.0260735	Up
AT5G47330	AT5G47330	AT5G47330	2.66188	0.00940439	Up
AT1G61930	AT1G61930	AT1G61930	2.65886	1.24e-05	Up
AT1G01030	NGA3	AT1G01030	2.65445	2.35e-05	Up
AT4G15610	AT4G15610	AT4G15610	2.65416	0.0427215	Up
AT5G01445	AT5G01445	AT5G01445	2.65195	0.000124153	Up
AT3G48660	AT3G48660	AT3G48660	2.65088	7.29e-05	Up
AT4G16146	AT4G16146	AT4G16146	2.65017	0.00390753	Up
AT3G14900	EMB3120	AT3G14900	2.64559	0.000102854	Up
AT5G17000	AT5G17000	AT5G17000	2.6414	2.72e-06	Up
AT2G35382	AT2G35382	AT2G35382	2.63786	0.0175757	Up
AT2G44578	AT2G44578	AT2G44578	2.63377	0.0321673	Up
AT5G48880	KAT5	AT5G48880	2.62706	0.000202201	Up
AT4G23420	AT4G23420	AT4G23420	2.62497	0.000466264	Up
AT5G57500	AT5G57500	AT5G57500	2.62378	0.0195099	Up
AT3G04175	AT3G04175	AT3G04175	2.62013	0.000917561	Up
AT5G05810	ATL43	AT5G05810	2.61951	0.00150809	Up
AT2G23340	DEAR3	AT2G23340	2.61879	1.1e-06	Up
AT4G08870	ARGAH2	AT4G08870	2.60875	1.52e-06	Up
AT1G66760	AT1G66760	AT1G66760	2.60735	0.00380588	Up
AT5G50720	HVA22E	AT5G50720	2.60482	1.93e-05	Up
AT4G37140	MEE69	AT4G37140	2.6047	0.0453213	Up
AT5G14580	AT5G14580	AT5G14580	2.60145	0.00105654	Up
AT1G20440	COR47	AT1G20440	2.5999	4.43e-05	Up
AT3G09480	AT3G09480	AT3G09480	2.59464	0.0156926	Up
AT2G39920	AT2G39920	AT2G39920	2.5943	0.00913749	Up
AT3G59710	AT3G59710	AT3G59710	2.59227	0.0124877	Up
AT5G15190	AT5G15190	AT5G15190	2.59071	0.00411734	Up
AT1G11670	AT1G11670	AT1G11670	2.58968	0.000110048	Up
AT1G08115	U1.5	AT1G08115	2.58881	0.000824809	Up
AT1G20450	ERD10	AT1G20450	2.58602	1.08e-05	Up
AT2G25810	TIP4;1	AT2G25810	2.58513	0.045944	Up
AT2G34140	AT2G34140	AT2G34140	2.58203	0.00191183	Up
AT4G36830	HOS3-1	AT4G36830	2.58178	5.55e-05	Up
AT1G31550	AT1G31550	AT1G31550	2.57692	1.49e-09	Up
AT3G46650	AT3G46650	AT3G46650	2.57118	0.000286798	Up
AT1G67120	AT1G67120	AT1G67120	2.56519	0.00194989	Up
AT5G10410	AT5G10410	AT5G10410	2.56271	4.68e-05	Up
ATCG00590	petL	ATCG00590	2.56134	6.14e-05	Up
AT5G61780	Tudor2	AT5G61780	2.56124	2.21e-10	Up
AT1G05993	AT1G05993	AT1G05993	2.55273	0.041895	Up
ATCG00390	ATCG00390	ATCG00390	2.5474	0.0063034	Up
AT5G25790	AT5G25790	AT5G25790	2.54557	0.000458194	Up
AT2G39770	CYT1	AT2G39770	2.54539	9.53e-12	Up
AT1G69050	AT1G69050	AT1G69050	2.54341	0.00180074	Up
AT1G45145	TRX5	AT1G45145	2.54194	0.00206281	Up
ATMG00090	rps3 ATMG00090	ATMG00090	2.54042	5.92e-10	Up
AT5G46600	AT5G46600	AT5G46600	2.54037	0.000332853	Up
AT5G55180	AT5G55180	AT5G55180	2.53848	0.000760533	Up
AT1G23100	AT1G23100	AT1G23100	2.53718	1.33e-05	Up
AT5G58700	PLC4	AT5G58700	2.52966	0.000332927	Up
AT5G27520	PNC2	AT5G27520	2.52417	8.9e-05	Up
AT5G44350	AT5G44350	AT5G44350	2.51622	0.0197026	Up
AT5G17700	AT5G17700	AT5G17700	2.51612	0.0107636	Up
AT4G25225	AT4G25225	AT4G25225	2.5143	1.46e-17	Up
AT4G15490	UGT84A3	AT4G15490	2.5111	1.51e-07	Up
AT1G29330	ERD2 AT1G29330	AT1G29330	2.5101	1.19e-07	Up
AT2G16720	MYB7	AT2G16720	2.50897	1.34e-05	Up
AT4G19230	CYP707A1	AT4G19230	2.50718	0.00150393	Up
AT4G22620	AT4G22620	AT4G22620	2.50614	0.00696057	Up
AT4G29740	CKX4	AT4G29740	2.50077	0.00318705	Up
AT1G61890	AT1G61890	AT1G61890	2.50042	0.000235432	Up
AT5G05590	PAI2	AT5G05590	2.48419	2.57e-07	Up
AT1G74100	SOT16	AT1G74100	2.48015	2.59e-05	Up
AT5G11160	APT5	AT5G11160	2.47957	0.0022211	Up
AT5G27660	DEG14	AT5G27660	2.47933	0.000105036	Up
AT3G11591	AT3G11591	AT3G11591	2.4785	7.17e-06	Up
AT5G04415	ath-MIR5657	AT5G04415	2.47658	0.0160033	Up
AT4G40065	AT4G40065	AT4G40065	2.47652	0.00262505	Up
AT2G29490	GSTU1	AT2G29490	2.4662	0.0426246	Up
AT4G32780	AT4G32780	AT4G32780	2.4625	0.0340223	Up
AT5G64710	AT5G64710	AT5G64710	2.46148	0.0152669	Up
AT4G30530	GGP1	AT4G30530	2.45614	0.00010958	Up
AT1G11185	AT1G11185	AT1G11185	2.45221	0.0406854	Up
AT5G04105	U1.4	AT5G04105	2.45173	0.0139574	Up
AT5G43380	TOPP6	AT5G43380	2.45025	0.000220361	Up
AT4G19700	RING	AT4G19700	2.44551	1.94e-06	Up
AT5G24380	YSL2	AT5G24380	2.43962	0.0482831	Up
AT5G17850	AT5G17850	AT5G17850	2.43704	0.000808179	Up
AT3G61190	BAP1	AT3G61190	2.43429	0.0343027	Up
AT4G15215	ABCG41	AT4G15215	2.43297	0.00288466	Up
AT3G05325	AT3G05325	AT3G05325	2.43249	0.01155	Up
AT1G80120	AT1G80120	AT1G80120	2.42953	0.000315415	Up
AT4G01895	AT4G01895	AT4G01895	2.42647	0.0220996	Up
ATCG01200	ATCG01200	ATCG01200	2.42531	5.53e-05	Up
AT4G38380	AT4G38380	AT4G38380	2.422	0.0285338	Up
AT1G10585	AT1G10585	AT1G10585	2.42034	0.00904349	Up
AT2G35290	AT2G35290	AT2G35290	2.41736	0.00569765	Up
AT5G18860	NSH3	AT5G18860	2.41312	8.43e-07	Up
ATCG00930	ATCG00930	ATCG00930	2.41224	7.6e-05	Up
AT3G25221	AT3G25221	AT3G25221	2.41031	0.0206362	Up
AT1G78660	GGH1	AT1G78660	2.40861	1.76e-14	Up
AT1G14060	AT1G14060	AT1G14060	2.40716	1.95e-06	Up
AT1G64890	AT1G64890	AT1G64890	2.4043	3.94e-07	Up
AT5G55090	MAPKKK15	AT5G55090	2.40362	0.0424503	Up
AT3G50620	AT3G50620	AT3G50620	2.40263	2.59e-08	Up
AT1G73210	AT1G73210	AT1G73210	2.40233	5.07e-05	Up
AT2G28650	EXO70H8	AT2G28650	2.40192	0.0333584	Up
AT2G15960	AT2G15960	AT2G15960	2.40038	0.00113547	Up
AT4G37150	MES9	AT4G37150	2.39201	0.00363938	Up
AT4G15258	SNOR37-2	AT4G15258	2.38813	0.0106296	Up
ATCG00420	ndhJ	ATCG00420	2.38339	3.84e-05	Up
ATCG01070	ndhE	ATCG01070	2.38189	6.41e-07	Up
AT2G34090	MEE18	AT2G34090	2.38015	6.11e-09	Up
AT5G54960	PDC2	AT5G54960	2.37785	1.33e-05	Up
AT3G08275	AT3G08275	AT3G08275	2.37213	0.000270596	Up
AT3G55940	AT3G55940	AT3G55940	2.36897	0.00392933	Up
AT5G03680	PTL	AT5G03680	2.36783	0.00941798	Up
AT1G15870	AT1G15870	AT1G15870	2.3656	0.0217089	Up
AT1G56650	PAP1 AT1G56650	AT1G56650	2.36487	0.00710393	Up
AT4G06305	AT4G06305	AT4G06305	2.36458	0.00104597	Up
AT3G19270	CYP707A4	AT3G19270	2.35686	0.0215233	Up
AT1G53633	AT1G53633	AT1G53633	2.35007	0.000279581	Up
AT4G05815	AT4G05815	AT4G05815	2.34697	0.0209982	Up
AT2G04405	AT2G04405	AT2G04405	2.34432	0.0196655	Up
AT3G49320	AT3G49320	AT3G49320	2.34285	0.000507682	Up
AT5G44050	AT5G44050	AT5G44050	2.33294	0.00054346	Up
AT2G46650	CB5-C	AT2G46650	2.33282	0.000452406	Up
AT4G21865	AT4G21865	AT4G21865	2.33214	1.58e-07	Up
AT2G20480	AT2G20480	AT2G20480	2.32703	0.000266587	Up
AT1G54690	GAMMA-H2AX	AT1G54690	2.32593	3.44e-08	Up
AT4G29210	GGT4	AT4G29210	2.32519	1.98e-12	Up
AT4G21570	AT4G21570	AT4G21570	2.32462	1.52e-06	Up
AT3G10530	AT3G10530	AT3G10530	2.32243	0.000325183	Up
AT2G34810	AT2G34810	AT2G34810	2.32171	5.48e-05	Up
AT2G30600	AT2G30600	AT2G30600	2.32056	0.000487945	Up
AT2G32487	AT2G32487	AT2G32487	2.31675	0.0360633	Up
AT5G09840	AT5G09840	AT5G09840	2.31493	0.00124821	Up
AT1G12240	ATBETAFRUCT4	AT1G12240	2.31471	5.16e-10	Up
AT2G05215	AT2G05215	AT2G05215	2.30826	0.00498768	Up
AT1G75450	CKX5	AT1G75450	2.29957	0.000295137	Up
AT1G08103	AT1G08103	AT1G08103	2.29874	0.0150432	Up
AT5G61455	U2.7 AT5G61455	AT5G61455	2.29715	0.00699761	Up
AT2G29420	GSTU7	AT2G29420	2.29465	5.03e-09	Up
AT3G27880	AT3G27880	AT3G27880	2.29224	3.26e-05	Up
AT4G01080	TBL26	AT4G01080	2.29093	0.00293622	Up
AT5G16190	CSLA11	AT5G16190	2.28843	0.00184874	Up
ATMG00670	ATMG00670	ATMG00670	2.28774	0.00222186	Up
ATCG01190	ATCG01190	ATCG01190	2.28642	0.00158197	Up
AT4G10390	AT4G10390	AT4G10390	2.2864	0.0122759	Up
AT2G29710	AT2G29710	AT2G29710	2.28574	0.00296062	Up
AT4G01670	AT4G01670	AT4G01670	2.28465	0.0318043	Up
AT2G22080	AT2G22080	AT2G22080	2.28407	2.59e-05	Up
AT3G01695	U1.7	AT3G01695	2.28225	0.0002039	Up
AT1G62660	AT1G62660	AT1G62660	2.2802	3.24e-11	Up
AT5G46085	AT5G46085	AT5G46085	2.27977	0.00426127	Up
AT2G08725	AT2G08725	AT2G08725	2.2793	0.0205347	Up
ATCG00940	ATCG00940	ATCG00940	2.27872	0.00158031	Up
AT2G38860	YLS5	AT2G38860	2.27226	0.000447068	Up
AT5G57887	AT5G57887	AT5G57887	2.2688	1.23e-06	Up
AT3G06355	AT3G06355	AT3G06355	2.26424	7.83e-07	Up
AT1G28190	AT1G28190	AT1G28190	2.25249	0.0452196	Up
AT4G12382	AT4G12382	AT4G12382	2.24755	0.0385933	Up
AT1G18870	ICS2	AT1G18870	2.24731	0.00348432	Up
AT3G02510	AT3G02510	AT3G02510	2.24673	8.06e-08	Up
AT4G31500	CYP83B1	AT4G31500	2.24511	0.000216588	Up
AT1G04187	AT1G04187	AT1G04187	2.24273	0.0115291	Up
ATCG00330	rps14	ATCG00330	2.24219	8.29e-06	Up
AT3G52500	AT3G52500	AT3G52500	2.24033	2.08e-06	Up
AT3G54420	EP3	AT3G54420	2.23936	0.000419605	Up
AT5G40210	UMAMIT42	AT5G40210	2.23921	2.23e-05	Up
AT5G57570	AT5G57570	AT5G57570	2.23668	0.0118071	Up
AT1G64600	AT1G64600	AT1G64600	2.23548	0.00391588	Up
AT1G52270	AT1G52270	AT1G52270	2.23445	0.0301778	Up
AT2G46520	AT2G46520	AT2G46520	2.23361	3.69e-12	Up
AT2G20723	AT2G20723	AT2G20723	2.22993	0.0363061	Up
AT2G30360	SIP4	AT2G30360	2.22783	0.00195503	Up
AT1G75580	AT1G75580	AT1G75580	2.2218	0.0134897	Up
AT5G08525	AT5G08525	AT5G08525	2.21819	0.0294199	Up
AT5G01840	OFP1	AT5G01840	2.21688	0.000359911	Up
AT3G01715	U1.6	AT3G01715	2.21653	0.000279581	Up
AT5G53750	AT5G53750	AT5G53750	2.21645	0.00107563	Up
AT1G10700	PRS3	AT1G10700	2.21047	6.75e-07	Up
AT3G23370	AT3G23370	AT3G23370	2.21037	0.0395796	Up
AT5G52410	AT5G52410	AT5G52410	2.20971	5.67e-07	Up
ATMG00570	ATMG00570	ATMG00570	2.20828	0.000440525	Up
AT3G07725	AT3G07725	AT3G07725	2.20236	0.000185207	Up
AT1G20490	AT1G20490	AT1G20490	2.19982	0.021301	Up
AT4G27070	TSB2	AT4G27070	2.19846	6.94e-06	Up
AT2G32220	AT2G32220	AT2G32220	2.19467	4.18e-06	Up
ATMG00980	AT2G07675 ATMG00980	ATMG00980	2.19286	0.0114319	Up
AT2G07675	AT2G07675 AT2G07675	AT2G07675	2.19286	0.0114319	Up
AT5G49480	CP1 AT5G49480	AT5G49480	2.19112	0.000676456	Up
AT4G05120	FUR1	AT4G05120	2.18868	0.00244706	Up
AT5G57880	MPS1	AT5G57880	2.18745	4.17e-07	Up
AT3G07320	AT3G07320	AT3G07320	2.18664	0.0285847	Up
AT1G02405	AT1G02405	AT1G02405	2.18595	0.00404688	Up
AT1G56660	AT1G56660	AT1G56660	2.18476	0.00363615	Up
AT1G75335	AT1G75335	AT1G75335	2.18163	0.000110438	Up
AT5G47455	AT5G47455	AT5G47455	2.1761	5.46e-10	Up
ATCG01110	ndhH	ATCG01110	2.17586	1.8e-05	Up
AT4G21410	CRK29	AT4G21410	2.17556	0.000220587	Up
AT5G66590	AT5G66590	AT5G66590	2.17509	0.000703506	Up
AT2G04080	AT2G04080	AT2G04080	2.17255	1.84e-07	Up
AT5G11740	AGP15	AT5G11740	2.17009	0.000101676	Up
AT1G53490	HEI10	AT1G53490	2.16979	0.0122347	Up
AT4G34230	CAD5	AT4G34230	2.1687	0.000367122	Up
AT5G44010	AT5G44010	AT5G44010	2.16218	0.0188368	Up
AT1G31835	AT1G31835	AT1G31835	2.15992	0.000312758	Up
AT1G18300	NUDT4	AT1G18300	2.15846	0.0383879	Up
AT4G05330	AGD13	AT4G05330	2.15549	0.000207287	Up
AT1G53345	AT1G53345	AT1G53345	2.14866	0.0299447	Up
AT5G17450	HIPP21	AT5G17450	2.14815	8.43e-06	Up
AT5G47060	AT5G47060	AT5G47060	2.14775	9.2e-06	Up
AT3G22310	PMH1	AT3G22310	2.14399	0.00183255	Up
AT2G03670	CDC48B	AT2G03670	2.13979	0.000599809	Up
AT2G13660	AT2G13660	AT2G13660	2.1384	0.0398524	Up
AT2G23560	MES7	AT2G23560	2.13629	0.011785	Up
AT4G18010	IP5PII	AT4G18010	2.13607	0.000183948	Up
AT4G35060	HIPP25	AT4G35060	2.13448	0.000569015	Up
AT2G07671	AT2G07671	AT2G07671	2.13396	0.000147807	Up
AT1G70700	TIFY7	AT1G70700	2.13052	0.000396473	Up
AT2G04066	AT2G04066	AT2G04066	2.12886	3.19e-07	Up
AT1G69370	CM3	AT1G69370	2.12587	3.32e-07	Up
AT4G23410	TET5	AT4G23410	2.11977	0.00646996	Up
AT2G40435	AT2G40435	AT2G40435	2.11818	0.00183996	Up
AT3G16460	JAL34	AT3G16460	2.11745	0.0110416	Up
AT1G06087	AT1G06087	AT1G06087	2.11691	0.0240665	Up
AT4G16750	AT4G16750	AT4G16750	2.11519	0.003021	Up
AT4G27870	AT4G27870	AT4G27870	2.11006	2.99e-07	Up
AT2G27230	LHW	AT2G27230	2.10493	1.34e-08	Up
AT1G04570	AT1G04570	AT1G04570	2.10458	0.00848089	Up
AT2G30870	GSTF10	AT2G30870	2.10242	3.43e-05	Up
AT2G09700	AT2G09700	AT2G09700	2.10227	2.34e-07	Up
AT2G38760	ANNAT3	AT2G38760	2.10105	0.00053702	Up
AT5G64870	AT5G64870	AT5G64870	2.09984	0.0416301	Up
AT3G44750	HDA3	AT3G44750	2.09046	0.00304414	Up
AT1G60640	AT1G60640	AT1G60640	2.08512	1.2e-06	Up
AT4G32290	AT4G32290	AT4G32290	2.08071	5.18e-06	Up
AT1G76580	AT1G76580	AT1G76580	2.07914	0.000189048	Up
AT5G35735	AT5G35735	AT5G35735	2.07245	0.0334543	Up
AT4G33700	AT4G33700	AT4G33700	2.06757	1.17e-09	Up
AT3G09550	AT3G09550	AT3G09550	2.06705	0.0100028	Up
ATMG01380	ATMG01380	ATMG01380	2.06545	0.000142475	Up
AT5G09440	EXL4 AT5G09440	AT5G09440	2.0654	0.0438313	Up
AT4G32200	ASY2	AT4G32200	2.06168	0.000322118	Up
AT5G61880	AT5G61880	AT5G61880	2.05592	0.000261542	Up
AT1G13360	AT1G13360	AT1G13360	2.05481	0.000211577	Up
AT1G70185	AT1G70185	AT1G70185	2.05433	0.0441372	Up
AT1G20600	AT1G20600	AT1G20600	2.05415	1.17e-07	Up
AT5G22630	ADT5	AT5G22630	2.04943	0.00803713	Up
AT1G78490	CYP708A3	AT1G78490	2.04773	0.000251397	Up
AT3G04770	RPSAb	AT3G04770	2.04718	0.00233861	Up
AT5G10695	AT5G10695	AT5G10695	2.04634	0.0214814	Up
AT2G07815	AT2G07815	AT2G07815	2.04632	0.000532241	Up
AT4G36648	AT4G36648	AT4G36648	2.04585	0.000220473	Up
AT3G44320	NIT3	AT3G44320	2.04183	9.51e-08	Up
ATCG00050	rps16	ATCG00050	2.0369	5.24e-08	Up
AT1G09913	AT1G09913	AT1G09913	2.03532	0.0447794	Up
AT5G54910	AT5G54910	AT5G54910	2.03364	4.78e-06	Up
AT3G14310	PME3	AT3G14310	2.0332	0.000783001	Up
AT4G39030	EDS5	AT4G39030	2.03205	0.0489897	Up
AT1G24575	AT1G24575	AT1G24575	2.03135	0.0120812	Up
AT2G46192	AT2G46192	AT2G46192	2.0289	2.89e-08	Up
AT1G01300	AT1G01300	AT1G01300	2.02103	5.26e-05	Up
ATCG00270	psbD	ATCG00270	2.02029	0.000574449	Up
AT4G27657	AT4G27657	AT4G27657	2.02011	0.000560995	Up
AT2G35930	PUB23	AT2G35930	2.01835	0.0180072	Up
AT2G06255	ELF4-L3	AT2G06255	2.01766	0.0184618	Up
AT5G50940	AT5G50940	AT5G50940	2.01737	0.00883959	Up
AT2G05765	AT2G05765	AT2G05765	2.01707	0.00288466	Up
AT1G25320	AT1G25320	AT1G25320	2.014	0.0419535	Up
AT4G39940	AKN2	AT4G39940	2.01292	0.0092182	Up
ATMG01280	ATMG01280	ATMG01280	2.01143	0.00163213	Up
AT3G57450	AT3G57450	AT3G57450	2.01115	0.00412789	Up
ATCG01060	psaC	ATCG01060	2.00724	0.0043532	Up
AT5G56760	SERAT1;1	AT5G56760	2.00574	1.17e-08	Up
AT2G07761	AT2G07761	AT2G07761	2.00565	0.0154504	Up
ATMG00340	ATMG00340	ATMG00340	2.0056	0.0157729	Up
AT2G19640	ASHR2	AT2G19640	2.0052	0.00128089	Up
ATMG00660	ATMG00660	ATMG00660	2.00375	4.81e-14	Up
AT2G04435	AT2G04435	AT2G04435	2.00307	0.0185605	Up
AT1G64760	AT1G64760	AT1G64760	2.00237	0.0027448	Up
AT3G03060	AT3G03060	AT3G03060	1.99956	0.00664913	Up
AT1G74450	AT1G74450	AT1G74450	1.99905	0.00849278	Up
AT4G21215	AT4G21215	AT4G21215	1.99754	9.04e-07	Up
AT4G32800	AT4G32800	AT4G32800	1.99546	0.00265918	Up
AT2G18220	AT2G18220	AT2G18220	1.99517	0.000557855	Up
AT4G39260	CCR1 AT4G39260	AT4G39260	1.99499	1.62e-12	Up
AT1G27030	AT1G27030	AT1G27030	1.99395	0.00839459	Up
AT3G13650	AT3G13650	AT3G13650	1.99254	0.020894	Up
ATMG01080	atp9	ATMG01080	1.98628	0.000485489	Up
AT2G01170	BAT1 AT2G01170	AT2G01170	1.9853	5.79e-05	Up
AT1G32385	AT1G32385	AT1G32385	1.98324	0.00500528	Up
ATCG00140	atpH	ATCG00140	1.98132	0.000638143	Up
AT1G70820	AT1G70820	AT1G70820	1.9757	2.32e-05	Up
AT4G26600	AT4G26600	AT4G26600	1.97569	0.000704855	Up
AT4G06255	AT4G06255	AT4G06255	1.97554	0.00306392	Up
AT1G14130	AT1G14130	AT1G14130	1.97469	0.000566201	Up
AT1G08300	NVL	AT1G08300	1.97358	0.00488862	Up
AT2G37690	AT2G37690	AT2G37690	1.97349	0.0011149	Up
AT1G07693	AT1G07693	AT1G07693	1.97037	0.0326399	Up
AT3G05880	RCI2A	AT3G05880	1.96709	0.00109229	Up
AT1G80270	PPR596	AT1G80270	1.96567	8.35e-05	Up
AT2G30020	AT2G30020	AT2G30020	1.96463	0.0482696	Up
AT2G03980	AT2G03980	AT2G03980	1.96216	2.43e-05	Up
AT3G60980	AT3G60980	AT3G60980	1.96189	2.1e-05	Up
AT5G40700	AT5G40700	AT5G40700	1.96061	0.0420611	Up
AT5G15700	AT5G15700	AT5G15700	1.95731	0.000902575	Up
AT3G08640	AT3G08640	AT3G08640	1.95587	1.06e-08	Up
AT3G28007	SWEET4	AT3G28007	1.95341	0.0453495	Up
AT5G39790	AT5G39790	AT5G39790	1.95316	5.24e-08	Up
AT5G06870	PGIP2	AT5G06870	1.95278	0.00426043	Up
AT1G60080	AT1G60080	AT1G60080	1.95195	0.000323952	Up
AT5G52882	AT5G52882	AT5G52882	1.94745	0.000876024	Up
AT5G60870	RUG3	AT5G60870	1.94307	0.00387604	Up
ATCG00130	atpF	ATCG00130	1.94109	4.47e-05	Up
AT5G49550	BLOS2	AT5G49550	1.9372	2.45e-16	Up
AT3G04230	AT3G04230	AT3G04230	1.9345	1.14e-08	Up
AT5G13490	AAC2	AT5G13490	1.93137	0.000203738	Up
AT3G02570	MEE31	AT3G02570	1.93107	4.28e-06	Up
AT1G21740	AT1G21740	AT1G21740	1.93037	0.0205197	Up
ATMG01000	ATMG01000	ATMG01000	1.92769	0.000101385	Up
AT4G35985	AT4G35985	AT4G35985	1.92476	0.00661569	Up
AT3G13275	AT3G13275	AT3G13275	1.92464	1.74e-05	Up
AT1G77030	AT1G77030	AT1G77030	1.92312	0.000490459	Up
AT1G05273	U2.1	AT1G05273	1.92236	0.000905916	Up
AT4G15440	HPL1	AT4G15440	1.92067	0.00244628	Up
AT3G21540	AT3G21540	AT3G21540	1.9199	0.000445137	Up
AT3G52770	ZPR3	AT3G52770	1.91723	0.00147986	Up
AT1G77885	AT1G77885	AT1G77885	1.91576	0.00196872	Up
AT3G17890	AT3G17890	AT3G17890	1.91466	0.00155254	Up
AT1G22270	AT1G22270	AT1G22270	1.91005	8e-09	Up
AT4G27440	PORB	AT4G27440	1.90922	0.0115787	Up
AT5G12050	AT5G12050	AT5G12050	1.90909	0.0125731	Up
AT4G18520	AT4G18520	AT4G18520	1.90385	4.27e-11	Up
AT3G12510	AT3G12510	AT3G12510	1.90128	0.012371	Up
AT5G21280	AT5G21280	AT5G21280	1.89808	0.0275079	Up
AT1G53542	AT1G53542	AT1G53542	1.89737	0.011974	Up
AT4G13950	RALFL31	AT4G13950	1.89324	5.44e-06	Up
AT1G61570	TIM13	AT1G61570	1.89262	5.73e-08	Up
AT1G25250	IDD16	AT1G25250	1.89247	0.000894375	Up
AT1G77450	NAC032	AT1G77450	1.89182	0.030725	Up
AT1G04277	AT1G04277	AT1G04277	1.8916	0.00647472	Up
AT1G02690	IMPA-6	AT1G02690	1.89149	0.00163414	Up
AT4G17680	AT4G17680	AT4G17680	1.89142	0.0126931	Up
AT1G15440	PWP2	AT1G15440	1.88957	0.00872863	Up
AT3G13150	AT3G13150	AT3G13150	1.88932	0.00857152	Up
AT2G01640	AT2G01640	AT2G01640	1.88719	8.42e-11	Up
AT2G27470	NF-YB11	AT2G27470	1.88457	6.36e-06	Up
AT2G04455	U2.10b/12	AT2G04455	1.88411	0.0353257	Up
AT5G04330	CYP84A4	AT5G04330	1.88386	0.00147403	Up
AT5G47240	NUDT8	AT5G47240	1.88348	0.0489245	Up
AT4G01850	SAM-2	AT4G01850	1.88322	1.3e-11	Up
ATCG01280	ycf2 ATCG01280	ATCG01280	1.87995	2.61e-05	Up
AT1G69870	NRT1.7	AT1G69870	1.87818	0.00275162	Up
ATCG00860	ycf2 ATCG00860	ATCG00860	1.8771	2.05e-05	Up
AT3G63050	AT3G63050	AT3G63050	1.87659	0.00810151	Up
AT5G64260	EXL2	AT5G64260	1.87568	0.00534416	Up
AT5G44720	AT5G44720	AT5G44720	1.87253	3.03e-05	Up
AT1G25220	ASB1	AT1G25220	1.87169	0.00387695	Up
AT1G01470	LEA14	AT1G01470	1.87126	0.00448732	Up
AT2G09695	AT2G09695	AT2G09695	1.87034	0.0282637	Up
ATCG00190	rpoB	ATCG00190	1.8693	0.00012018	Up
AT3G56825	U2.4 AT3G56825	AT3G56825	1.86884	0.000468263	Up
AT3G48830	AT3G48830	AT3G48830	1.86796	0.0147842	Up
AT3G20015	AT3G20015	AT3G20015	1.86673	0.00251396	Up
AT5G40450	AT5G40450	AT5G40450	1.86497	0.00177586	Up
ATCG00600	petG	ATCG00600	1.86479	0.000387776	Up
AT1G29535	AT1G29535	AT1G29535	1.86417	0.0198179	Up
AT1G28390	AT1G28390	AT1G28390	1.86387	0.0162613	Up
AT1G26218	AT1G26218	AT1G26218	1.86369	0.000217921	Up
ATCG00670	ATCG00670	ATCG00670	1.8603	1.02e-06	Up
AT1G10090	AT1G10090	AT1G10090	1.85883	4.41e-05	Up
AT5G15240	AT5G15240	AT5G15240	1.85519	0.00123577	Up
ATCG00100	ATCG00100	ATCG00100	1.85453	0.00598238	Up
AT3G13310	AT3G13310	AT3G13310	1.85277	0.000336088	Up
AT4G09510	CINV2	AT4G09510	1.85132	0.00238528	Up
AT1G61730	AT1G61730	AT1G61730	1.85027	2.41e-09	Up
AT5G27680	RECQSIM	AT5G27680	1.849	0.000959529	Up
AT5G54810	TSB1	AT5G54810	1.84805	1.24e-05	Up
AT4G05631	AT4G05631	AT4G05631	1.84788	0.0120502	Up
AT4G24960	HVA22D	AT4G24960	1.84723	0.0007506	Up
AT1G75670	AT1G75670	AT1G75670	1.84663	0.000449347	Up
AT1G58200	MSL3	AT1G58200	1.84546	6.36e-06	Up
AT5G16380	AT5G16380	AT5G16380	1.84338	1.63e-05	Up
AT1G04070	TOM22-I	AT1G04070	1.84217	3.45e-08	Up
AT4G18280	AT4G18280	AT4G18280	1.83882	0.0011096	Up
AT3G57940	AT3G57940	AT3G57940	1.83646	0.000394521	Up
ATCG00160	rps2	ATCG00160	1.83423	4.27e-06	Up
AT3G25870	AT3G25870	AT3G25870	1.83411	0.00181807	Up
AT3G05120	GID1A	AT3G05120	1.83401	2.4e-05	Up
AT1G32860	AT1G32860	AT1G32860	1.83309	0.0319449	Up
AT5G04545	AT5G04545	AT5G04545	1.83235	0.00236798	Up
AT3G05640	AT3G05640	AT3G05640	1.83063	0.00121057	Up
AT4G26670	AT4G26670	AT4G26670	1.82961	0.0457398	Up
AT3G41979	AT2G01020 AT3G41979	AT3G41979	1.82925	0.000144779	Up
AT1G09970	LRR XI-23	AT1G09970	1.82859	0.00237302	Up
AT4G04180	AT4G04180	AT4G04180	1.82712	0.0130048	Up
AT2G02100	LCR69	AT2G02100	1.82598	0.0310293	Up
AT4G16630	AT4G16630	AT4G16630	1.82554	0.00401421	Up
AT2G21130	AT2G21130	AT2G21130	1.82497	0.00499718	Up
AT3G05550	AT3G05550	AT3G05550	1.82456	0.048307	Up
AT5G39785	AT5G39785	AT5G39785	1.82424	0.0116049	Up
AT3G16690	SWEET16	AT3G16690	1.82398	0.00319512	Up
AT2G01020	AT2G01020 AT2G01020	AT2G01020	1.82326	0.000144961	Up
AT1G80520	AT1G80520	AT1G80520	1.82272	1.26e-05	Up
AT4G19390	AT4G19390	AT4G19390	1.82112	0.0126504	Up
AT3G25700	AT3G25700	AT3G25700	1.81528	0.00510078	Up
AT1G75190	AT1G75190	AT1G75190	1.81516	0.0025083	Up
AT3G46620	RDUF1	AT3G46620	1.81486	0.036329	Up
AT1G13790	FDM4	AT1G13790	1.81358	0.0165988	Up
AT2G19450	TAG1	AT2G19450	1.81222	0.0476562	Up
AT2G29995	AT2G29995	AT2G29995	1.81031	0.000290777	Up
AT5G07140	AT5G07140	AT5G07140	1.80896	0.0260735	Up
AT3G01930	AT3G01930	AT3G01930	1.80736	1.07e-06	Up
AT3G24515	UBC37	AT3G24515	1.80645	0.0107551	Up
AT2G30860	GSTF9	AT2G30860	1.80518	1e-05	Up
AT2G28420	GLYI8	AT2G28420	1.80516	0.0184708	Up
AT1G07903	AT1G07903	AT1G07903	1.80385	0.019672	Up
AT4G24830	AT4G24830	AT4G24830	1.80322	1.07e-06	Up
AT1G44890	AT1G44890	AT1G44890	1.8026	0.000384947	Up
AT1G53035	AT1G53035	AT1G53035	1.80076	0.00537367	Up
AT1G18320	AT1G18320	AT1G18320	1.79965	0.00762214	Up
AT5G55120	VTC5	AT5G55120	1.79793	4.47e-05	Up
AT5G67480	BT4	AT5G67480	1.79731	0.00174066	Up
AT3G46970	PHS2	AT3G46970	1.7963	0.000382091	Up
AT3G06100	NIP7;1	AT3G06100	1.795	0.0400965	Up
AT1G17460	TRFL3	AT1G17460	1.79459	0.0219492	Up
AT5G61030	GR-RBP3	AT5G61030	1.79432	2.03e-05	Up
AT3G48350	CEP3	AT3G48350	1.79128	0.0114963	Up
AT3G57490	AT3G57490	AT3G57490	1.78865	0.000922103	Up
AT1G70800	EHB1	AT1G70800	1.7879	0.0247761	Up
AT3G15750	AT3G15750	AT3G15750	1.7868	0.00548928	Up
AT3G02190	AT3G02190	AT3G02190	1.78434	1.57e-15	Up
AT5G66540	AT5G66540	AT5G66540	1.78368	0.000359886	Up
AT3G57520	SIP2	AT3G57520	1.78368	0.0462352	Up
AT5G27860	AT5G27860	AT5G27860	1.78191	1.48e-18	Up
AT5G25450	AT5G25450	AT5G25450	1.77801	0.0162673	Up
AT1G09867	AT1G09867	AT1G09867	1.77509	0.0251171	Up
AT1G79075	AT1G79075	AT1G79075	1.77497	0.00241167	Up
AT5G20190	AT5G20190	AT5G20190	1.77095	0.000467806	Up
AT2G07681	ABCI4	AT2G07681	1.76937	0.0263586	Up
AT2G36220	AT2G36220	AT2G36220	1.76905	0.041895	Up
AT2G07696	RPS7 AT2G07696	AT2G07696	1.76736	0.00531897	Up
AT2G32240	AT2G32240	AT2G32240	1.767	5.71e-06	Up
AT1G75166	AT1G75166	AT1G75166	1.76691	0.00535058	Up
AT5G45750	RABA1c	AT5G45750	1.7631	3.46e-06	Up
AT4G30560	CNGC9	AT4G30560	1.76264	0.0185557	Up
AT3G02832	AT3G02832	AT3G02832	1.76263	0.0123437	Up
AT2G28840	XBAT31	AT2G28840	1.76252	0.00585959	Up
AT2G20722	AT2G20722	AT2G20722	1.7617	0.0316178	Up
AT1G63250	AT1G63250	AT1G63250	1.76098	0.00453454	Up
AT5G61290	AT5G61290	AT5G61290	1.75608	0.00057781	Up
AT3G57765	U2.3 AT3G57765	AT3G57765	1.75599	0.00438769	Up
AT4G02400	AT4G02400	AT4G02400	1.75577	7.22e-05	Up
AT4G27500	PPI1	AT4G27500	1.75314	3.94e-20	Up
AT1G17830	AT1G17830	AT1G17830	1.75303	0.0037949	Up
AT1G54050	AT1G54050	AT1G54050	1.75291	0.00587778	Up
AT1G80720	AT1G80720	AT1G80720	1.75114	0.00163085	Up
AT2G19670	PRMT1A	AT2G19670	1.75107	0.0438488	Up
AT3G07735	AT3G07735	AT3G07735	1.75042	0.0143823	Up
AT5G27440	AT5G27440	AT5G27440	1.7471	0.014368	Up
AT3G13940	AT3G13940	AT3G13940	1.74596	0.00102777	Up
AT3G01160	AT3G01160	AT3G01160	1.74518	0.000332927	Up
AT3G55110	ABCG18	AT3G55110	1.74495	0.0362264	Up
ATMG01170	atp6-2	ATMG01170	1.7435	0.000223674	Up
AT1G04635	EMB1687	AT1G04635	1.74105	0.0403155	Up
AT1G70300	KUP6	AT1G70300	1.74037	0.0199828	Up
AT2G04955	AT2G04955	AT2G04955	1.73754	0.0103701	Up
AT1G78310	AT1G78310	AT1G78310	1.73734	0.000422757	Up
AT4G12750	AT4G12750	AT4G12750	1.73721	0.00188554	Up
AT5G52830	WRKY27	AT5G52830	1.73716	0.00288466	Up
AT5G65860	AT5G65860	AT5G65860	1.73627	0.000236218	Up
AT3G13230	AT3G13230	AT3G13230	1.73588	0.000318398	Up
AT5G42420	AT5G42420	AT5G42420	1.73544	0.000173832	Up
AT2G47650	UXS4	AT2G47650	1.73342	1.32e-09	Up
AT3G52470	AT3G52470	AT3G52470	1.73245	0.000253397	Up
AT1G52710	AT1G52710	AT1G52710	1.73185	1.14e-07	Up
ATMG09740	ATMG09740	ATMG09740	1.73007	0.00177312	Up
AT5G55280	FTSZ1-1	AT5G55280	1.72832	5.06e-08	Up
AT1G77420	AT1G77420	AT1G77420	1.72767	9.73e-08	Up
AT4G36580	AT4G36580	AT4G36580	1.72731	0.0162673	Up
AT1G60850	ATRPAC42	AT1G60850	1.72465	0.00180322	Up
ATCG00090	ATCG00090	ATCG00090	1.72388	0.00169378	Up
AT1G54030	MVP1	AT1G54030	1.72032	1.77e-10	Up
AT5G37780	CAM1	AT5G37780	1.71938	2.34e-08	Up
AT2G40230	AT2G40230	AT2G40230	1.71904	0.00185855	Up
AT1G20070	AT1G20070	AT1G20070	1.71849	0.0354364	Up
AT3G53370	AT3G53370	AT3G53370	1.71651	8.04e-06	Up
AT2G33847	AT2G33847	AT2G33847	1.71639	0.00518794	Up
AT5G01915	ath-MIR5629	AT5G01915	1.71398	0.00528965	Up
AT1G06000	AT1G06000	AT1G06000	1.70998	0.031777	Up
AT1G71080	AT1G71080	AT1G71080	1.70701	1.95e-05	Up
AT5G20600	AT5G20600	AT5G20600	1.70539	0.000233958	Up
AT1G06237	AT1G06237	AT1G06237	1.70522	0.0146902	Up
AT2G37510	AT2G37510	AT2G37510	1.70166	0.0102645	Up
AT5G26860	LON1	AT5G26860	1.69694	0.00134679	Up
AT3G01310	AT3G01310	AT3G01310	1.69382	4.75e-05	Up
AT3G27280	PHB4	AT3G27280	1.69225	0.00332475	Up
AT4G01990	AT4G01990	AT4G01990	1.6903	0.000218274	Up
AT1G71880	SUC1	AT1G71880	1.68902	0.0290028	Up
AT5G03630	ATMDAR2	AT5G03630	1.68822	6.19e-05	Up
AT2G27775	AT2G27775	AT2G27775	1.68814	0.000452512	Up
AT5G49300	GATA16	AT5G49300	1.68484	0.000408208	Up
AT5G01790	AT5G01790	AT5G01790	1.68297	0.0227833	Up
AT5G38890	AT5G38890	AT5G38890	1.6807	0.000194502	Up
AT2G07674	AT2G07674	AT2G07674	1.67984	0.000935398	Up
AT1G18330	EPR1 AT1G18330	AT1G18330	1.6785	5.66e-07	Up
AT4G25730	AT4G25730	AT4G25730	1.678	0.00885855	Up
AT5G63880	VPS20.1	AT5G63880	1.6738	0.000263972	Up
AT4G33625	AT4G33625	AT4G33625	1.66974	3.43e-06	Up
AT2G29450	GSTU5	AT2G29450	1.66953	0.000196431	Up
AT5G38720	AT5G38720	AT5G38720	1.66925	1.42e-05	Up
AT5G67510	AT5G67510	AT5G67510	1.66856	6.97e-06	Up
AT5G15650	RGP2	AT5G15650	1.66742	0.000113007	Up
AT5G09585	U2.5	AT5G09585	1.66727	0.0129327	Up
AT4G37660	AT4G37660	AT4G37660	1.66318	0.000136253	Up
AT4G30800	AT4G30800	AT4G30800	1.65901	0.0055702	Up
AT5G59980	GAF1	AT5G59980	1.6572	0.000574945	Up
AT3G24080	AT3G24080	AT3G24080	1.65498	3.88e-05	Up
AT2G20450	AT2G20450	AT2G20450	1.65487	0.00211307	Up
AT2G07773	AT2G07773	AT2G07773	1.65239	0.0220435	Up
AT2G22850	bZIP6	AT2G22850	1.65175	0.000410108	Up
AT5G63980	SAL1	AT5G63980	1.64862	1.9e-05	Up
AT2G07599	AT2G07599	AT2G07599	1.647	0.0293433	Up
AT1G07743	AT1G07743	AT1G07743	1.64601	0.00547427	Up
AT3G58660	AT3G58660	AT3G58660	1.64513	0.00763803	Up
AT5G39410	AT5G39410	AT5G39410	1.64469	0.00719651	Up
AT5G22100	AT5G22100	AT5G22100	1.64325	0.00443271	Up
ATMG00080	rpl16 ATMG00080	ATMG00080	1.64261	0.00242875	Up
AT3G19440	AT3G19440	AT3G19440	1.6404	0.010044	Up
AT3G55510	RBL AT3G55510	AT3G55510	1.63971	0.00353529	Up
AT1G10410	AT1G10410	AT1G10410	1.63913	0.00211697	Up
AT5G62440	AT5G62440	AT5G62440	1.63862	8.17e-06	Up
AT4G33990	EMB2758	AT4G33990	1.6378	0.0486995	Up
AT3G15210	ERF4	AT3G15210	1.6377	0.0040473	Up
AT5G10390	AT5G10390	AT5G10390	1.63755	0.0353257	Up
AT5G40490	AT5G40490	AT5G40490	1.6349	0.00024451	Up
AT3G57600	AT3G57600	AT3G57600	1.63343	0.00700007	Up
AT3G16810	PUM24	AT3G16810	1.63247	0.00244258	Up
AT3G56990	EDA7	AT3G56990	1.63219	0.00281441	Up
AT1G08920	ESL1	AT1G08920	1.63198	0.00181254	Up
AT4G11211	AT4G11211	AT4G11211	1.63042	0.0315279	Up
AT1G69970	CLE26	AT1G69970	1.62938	0.00394475	Up
ATCG01080	ndhG	ATCG01080	1.62874	0.0104053	Up
AT1G06640	AT1G06640	AT1G06640	1.62851	0.0020105	Up
AT5G41920	AT5G41920	AT5G41920	1.62827	7.34e-05	Up
AT4G36680	AT4G36680	AT4G36680	1.62772	4.22e-05	Up
AT3G11580	AT3G11580	AT3G11580	1.62734	0.0049852	Up
AT5G46330	FLS2 AT5G46330	AT5G46330	1.62483	0.0387308	Up
AT3G58570	AT3G58570	AT3G58570	1.62466	0.00959037	Up
AT1G70780	AT1G70780	AT1G70780	1.62306	2.97e-05	Up
ATMG01370	ATMG01370	ATMG01370	1.6227	0.0013234	Up
AT5G48240	AT5G48240	AT5G48240	1.6208	0.00460706	Up
AT1G61640	AT1G61640	AT1G61640	1.62055	0.000208241	Up
AT3G23830	GRP4	AT3G23830	1.6204	0.0354254	Up
AT5G09420	TOC64-V	AT5G09420	1.61912	0.0113127	Up
AT3G05715	AT3G05715	AT3G05715	1.61893	0.00268773	Up
AT1G04625	AT1G04625	AT1G04625	1.61767	1.72e-06	Up
AT1G29785	AT1G29785	AT1G29785	1.61638	7.69e-05	Up
AT1G76240	AT1G76240	AT1G76240	1.61588	0.0378431	Up
AT2G39020	AT2G39020	AT2G39020	1.61437	8.28e-06	Up
AT2G07695	AT2G07695	AT2G07695	1.614	0.0143499	Up
AT2G22450	RIBA2	AT2G22450	1.61126	0.010314	Up
AT5G58900	AT5G58900	AT5G58900	1.6108	0.00293445	Up
AT1G06033	AT1G06033	AT1G06033	1.61043	0.0210967	Up
AT4G15770	AT4G15770	AT4G15770	1.61014	0.000431451	Up
AT1G79160	AT1G79160	AT1G79160	1.60906	0.000477263	Up
AT5G14050	AT5G14050	AT5G14050	1.6084	0.00232983	Up
AT2G46100	AT2G46100	AT2G46100	1.60746	0.00182906	Up
AT5G07440	GDH2	AT5G07440	1.60733	0.0281651	Up
AT3G52040	AT3G52040	AT3G52040	1.60317	3.97e-07	Up
AT2G47990	SWA1	AT2G47990	1.60316	0.028933	Up
AT1G08580	AT1G08580	AT1G08580	1.60039	7.63e-05	Up
AT2G04375	U2.10	AT2G04375	1.5995	0.0322774	Up
AT2G35700	ERF38	AT2G35700	1.59927	0.00354482	Up
AT5G01830	SAUR21	AT5G01830	1.59834	0.016166	Up
AT5G63490	AT5G63490	AT5G63490	1.59678	4.72e-06	Up
AT3G62460	AT3G62460	AT3G62460	1.59505	0.00720218	Up
AT1G05010	EFE	AT1G05010	1.59349	0.0014981	Up
AT1G08507	AT1G08507	AT1G08507	1.59269	0.00443861	Up
AT1G29320	AT1G29320	AT1G29320	1.59192	0.00216757	Up
AT1G15250	AT1G15250	AT1G15250	1.59173	0.00301362	Up
AT1G71050	HIPP20	AT1G71050	1.59029	0.0395796	Up
AT1G68990	MGP3	AT1G68990	1.58714	8.33e-05	Up
AT3G56620	UMAMIT10	AT3G56620	1.58656	0.00129852	Up
AT5G23395	MIA40	AT5G23395	1.58534	1.95e-05	Up
AT1G77840	AT1G77840	AT1G77840	1.58495	9.93e-05	Up
AT1G73630	AT1G73630	AT1G73630	1.58341	0.00488862	Up
AT3G09540	AT3G09540	AT3G09540	1.58182	0.0317232	Up
AT4G16141	AT4G16141	AT4G16141	1.57921	0.0120726	Up
AT2G07774	AT2G07774	AT2G07774	1.57882	0.0462987	Up
AT4G23060	IQD22	AT4G23060	1.57845	0.0187306	Up
AT1G61667	AT1G61667	AT1G61667	1.57774	0.0315924	Up
AT2G45460	AT2G45460	AT2G45460	1.57711	8.9e-05	Up
AT2G18900	AT2G18900	AT2G18900	1.57675	0.0065453	Up
AT4G37090	AT4G37090	AT4G37090	1.57564	0.000423256	Up
AT1G18850	AT1G18850	AT1G18850	1.57555	0.00103605	Up
AT2G20940	AT2G20940	AT2G20940	1.57286	4.43e-05	Up
AT4G33985	AT4G33985	AT4G33985	1.57195	0.0236868	Up
AT1G49245	AT1G49245	AT1G49245	1.57113	1.19e-07	Up
AT1G22360	UGT85A2	AT1G22360	1.5711	0.00187268	Up
ATMG01390	ATMG01390	ATMG01390	1.57079	0.0183819	Up
AT1G72180	AT1G72180	AT1G72180	1.56921	0.000594009	Up
AT5G04905	AT5G04905	AT5G04905	1.56794	0.00857767	Up
AT5G46920	AT5G46920	AT5G46920	1.56736	1.8e-06	Up
AT2G31725	AT2G31725	AT2G31725	1.56676	0.0028118	Up
AT1G55040	AT1G55040	AT1G55040	1.56391	0.0176698	Up
AT3G49180	RID3	AT3G49180	1.56123	0.00583293	Up
AT5G21105	AT5G21105	AT5G21105	1.56113	0.000879248	Up
AT4G28330	AT4G28330	AT4G28330	1.56097	0.00301722	Up
AT2G22560	NET2D	AT2G22560	1.55995	0.00150809	Up
AT5G65310	HB5	AT5G65310	1.55759	0.00755183	Up
AT4G14680	APS3	AT4G14680	1.55663	0.0122094	Up
AT3G61100	AT3G61100	AT3G61100	1.55341	0.0211931	Up
AT5G50370	AT5G50370	AT5G50370	1.55184	0.0010632	Up
AT5G01500	TAAC	AT5G01500	1.55147	1.5e-05	Up
AT1G14590	AT1G14590	AT1G14590	1.55082	0.00076459	Up
ATMG01200	ATMG01200	ATMG01200	1.54905	0.0449287	Up
AT1G74950	TIFY10B	AT1G74950	1.54854	0.0267576	Up
AT5G18790	AT5G18790	AT5G18790	1.54794	0.00844373	Up
AT3G20390	AT3G20390	AT3G20390	1.5469	0.000230522	Up
AT1G76062	ath-MIR835	AT1G76062	1.54683	0.0488627	Up
AT5G16160	AT5G16160	AT5G16160	1.54536	0.0113127	Up
AT3G56020	AT3G56020	AT3G56020	1.54526	0.00201398	Up
ATMG00040	ATMG00040	ATMG00040	1.54366	0.00705355	Up
AT5G54170	AT5G54170	AT5G54170	1.54336	0.0175122	Up
AT5G50840	AT5G50840	AT5G50840	1.54104	4.97e-08	Up
AT3G63090	AT3G63090	AT3G63090	1.54056	2.34e-05	Up
AT2G38290	AMT2	AT2G38290	1.53685	0.0088227	Up
AT5G54970	AT5G54970	AT5G54970	1.53628	0.0274081	Up
AT5G60040	NRPC1	AT5G60040	1.53542	0.0185459	Up
AT5G28920	AT5G28920	AT5G28920	1.53523	0.0114319	Up
AT2G07629	AT2G07629	AT2G07629	1.53334	0.0328614	Up
ATCG01040	ccsA	ATCG01040	1.53322	0.000229365	Up
AT1G02370	AT1G02370	AT1G02370	1.53294	0.000912392	Up
AT2G28510	AT2G28510	AT2G28510	1.53229	9.81e-05	Up
AT3G13110	SERAT2;2	AT3G13110	1.53224	0.000129685	Up
AT2G39725	AT2G39725	AT2G39725	1.53106	0.000204177	Up
AT5G53420	AT5G53420	AT5G53420	1.53092	0.0122665	Up
AT5G11410	AT5G11410	AT5G11410	1.5308	0.0105729	Up
AT1G72450	JAZ6	AT1G72450	1.52988	0.0243555	Up
AT5G22840	AT5G22840	AT5G22840	1.52846	4.89e-05	Up
AT3G58710	WRKY69	AT3G58710	1.52737	0.00294609	Up
AT3G04950	AT3G04950	AT3G04950	1.52635	0.0129312	Up
AT3G45010	scpl48	AT3G45010	1.52534	0.00981755	Up
AT1G24100	UGT74B1	AT1G24100	1.52517	0.00499381	Up
AT5G63010	AT5G63010	AT5G63010	1.52268	0.0185495	Up
AT4G16500	AT4G16500	AT4G16500	1.52095	0.000652331	Up
AT2G15000	AT2G15000	AT2G15000	1.52002	8.46e-06	Up
AT1G30320	AT1G30320	AT1G30320	1.51913	0.0276063	Up
AT4G13850	GR-RBP2	AT4G13850	1.51868	0.00031134	Up
AT5G57630	CIPK21	AT5G57630	1.51565	0.00789553	Up
AT5G02050	AT5G02050	AT5G02050	1.51396	0.00415136	Up
AT1G29965	AT1G29965	AT1G29965	1.51204	0.000277505	Up
AT3G10110	MEE67	AT3G10110	1.51196	0.00814514	Up
AT5G43745	AT5G43745	AT5G43745	1.51156	0.00626046	Up
AT3G06320	AT3G06320	AT3G06320	1.51152	0.00535576	Up
AT3G52420	OEP7	AT3G52420	1.51106	4.97e-14	Up
AT4G08170	AT4G08170	AT4G08170	1.51032	0.00808768	Up
AT1G48920	NUC-L1	AT1G48920	1.50987	0.00931407	Up
AT3G14200	AT3G14200	AT3G14200	1.50958	0.000347673	Up
AT3G20640	AT3G20640	AT3G20640	1.50799	0.00451811	Up
AT1G08800	AT1G08800	AT1G08800	1.50698	0.00138127	Up
AT1G23150	AT1G23150	AT1G23150	1.50582	0.0201853	Up
AT2G29200	PUM1	AT2G29200	1.50578	0.0132726	Up
AT4G21170	AT4G21170	AT4G21170	1.50477	0.0127511	Up
AT3G21755	AT3G21755	AT3G21755	1.50413	0.0069028	Up
AT5G36220	CYP81D1	AT5G36220	1.50379	0.0278468	Up
AT3G23170	AT3G23170	AT3G23170	1.5034	0.0219571	Up
AT1G75220	ERDL6	AT1G75220	1.50189	0.000449565	Up
AT1G77570	AT1G77570	AT1G77570	1.50152	0.0337227	Up
AT5G58600	PMR5	AT5G58600	1.50064	0.0234746	Up
AT1G71110	AT1G71110	AT1G71110	1.50032	0.00317697	Up
AT3G45930	AT3G45930	AT3G45930	1.49907	0.0384796	Up
AT3G27170	CLC-B	AT3G27170	1.4988	0.0117166	Up
AT5G67300	MYBR1	AT5G67300	1.49647	0.0149738	Up
AT5G05990	AT5G05990	AT5G05990	1.4951	0.00301722	Up
AT4G05410	YAO	AT4G05410	1.49369	0.0117302	Up
AT4G02930	AT4G02930	AT4G02930	1.49341	0.000341771	Up
AT5G08565	AT5G08565	AT5G08565	1.49169	0.000195035	Up
AT2G39900	WLIM2a	AT2G39900	1.49154	0.0401449	Up
AT1G71430	AT1G71430	AT1G71430	1.49109	0.000344822	Up
AT3G59760	OASC	AT3G59760	1.49063	4.16e-05	Up
AT5G60030	AT5G60030	AT5G60030	1.48919	8.06e-05	Up
AT1G11780	AT1G11780	AT1G11780	1.48736	1.67e-07	Up
AT5G13200	AT5G13200	AT5G13200	1.48538	0.0452266	Up
AT4G39366	AT4G39366	AT4G39366	1.48447	0.000218274	Up
AT3G18440	ALMT9	AT3G18440	1.48372	1.53e-06	Up
AT3G19240	AT3G19240	AT3G19240	1.48275	0.00452089	Up
AT1G55500	ECT4	AT1G55500	1.4822	7.4e-08	Up
AT3G22290	AT3G22290	AT3G22290	1.48082	7.65e-11	Up
AT3G05220	AT3G05220	AT3G05220	1.4798	0.00395545	Up
AT5G57180	CIA2	AT5G57180	1.47737	0.0109285	Up
AT2G16890	AT2G16890	AT2G16890	1.47482	0.0355998	Up
AT3G18580	AT3G18580	AT3G18580	1.47295	4.88e-06	Up
AT3G13910	AT3G13910	AT3G13910	1.47235	0.00193298	Up
AT1G15480	AT1G15480	AT1G15480	1.47184	0.00423525	Up
ATMG01270	RPS7 ATMG01270	ATMG01270	1.47018	0.0453575	Up
ATCG00650	rps18	ATCG00650	1.46939	8.46e-05	Up
AT2G18330	AT2G18330	AT2G18330	1.46913	0.00128089	Up
ATCG00210	petN	ATCG00210	1.46831	0.00399176	Up
AT5G64640	AT5G64640	AT5G64640	1.46713	0.00171106	Up
AT1G70810	AT1G70810	AT1G70810	1.46646	0.037623	Up
AT2G02230	PP2-B1	AT2G02230	1.46596	0.0104053	Up
AT3G20362	AT3G20362	AT3G20362	1.46496	0.000352339	Up
AT1G19310	AT1G19310	AT1G19310	1.46492	0.00190634	Up
AT5G63120	AT5G63120	AT5G63120	1.46471	1.69e-06	Up
AT5G07730	AT5G07730	AT5G07730	1.46457	0.00203345	Up
AT5G11070	AT5G11070	AT5G11070	1.46392	0.033367	Up
AT3G61640	AGP20	AT3G61640	1.46367	0.000354159	Up
AT1G09487	AT1G09487	AT1G09487	1.46302	6.56e-05	Up
AT1G03830	AT1G03830	AT1G03830	1.4628	0.0389208	Up
AT4G31570	AT4G31570	AT4G31570	1.46269	0.00034284	Up
AT3G62050	AT3G62050	AT3G62050	1.46205	0.0452043	Up
AT4G17440	AT4G17440	AT4G17440	1.46148	0.00125827	Up
AT5G28300	AT5G28300	AT5G28300	1.46078	0.000517733	Up
AT4G09500	AT4G09500	AT4G09500	1.45881	0.0125869	Up
AT2G41110	CAM2	AT2G41110	1.45705	0.00161934	Up
AT2G44510	AT2G44510	AT2G44510	1.45673	0.0124352	Up
AT4G37630	CYCD5;1	AT4G37630	1.45602	1.5e-06	Up
AT2G14460	AT2G14460	AT2G14460	1.4557	0.000694632	Up
AT1G11960	AT1G11960	AT1G11960	1.45535	0.0282575	Up
AT5G41600	BTI3	AT5G41600	1.45443	0.00365934	Up
AT4G09030	AGP10	AT4G09030	1.45404	0.00398744	Up
AT2G34585	AT2G34585	AT2G34585	1.45241	4.14e-09	Up
AT2G32380	AT2G32380	AT2G32380	1.4504	0.00303207	Up
AT3G49240	emb1796	AT3G49240	1.44937	0.00161934	Up
AT1G69070	AT1G69070	AT1G69070	1.44936	0.00127258	Up
AT2G47890	AT2G47890	AT2G47890	1.44886	0.0436845	Up
AT1G15420	AT1G15420	AT1G15420	1.44821	0.0171101	Up
AT1G18740	AT1G18740	AT1G18740	1.44794	0.0339623	Up
AT1G71100	RSW10	AT1G71100	1.44772	0.00972928	Up
AT1G26470	AT1G26470	AT1G26470	1.44738	0.000933954	Up
AT2G14750	APK	AT2G14750	1.44635	0.0245289	Up
AT3G56720	AT3G56720	AT3G56720	1.44473	0.00270869	Up
AT2G08345	AT2G08345	AT2G08345	1.44418	8.5e-05	Up
ATMG00560	rpl2 ATMG00560	ATMG00560	1.44372	0.0417657	Up
AT2G46170	AT2G46170	AT2G46170	1.44303	4.08e-08	Up
AT1G51430	AT1G51430	AT1G51430	1.44146	7.86e-07	Up
AT5G14520	AT5G14520	AT5G14520	1.44043	0.0198179	Up
AT1G08230	AT1G08230	AT1G08230	1.43959	0.00783189	Up
AT2G42395	AT2G42395	AT2G42395	1.43898	0.00730168	Up
AT4G04940	AT4G04940	AT4G04940	1.43813	0.0196078	Up
AT1G48570	AT1G48570	AT1G48570	1.43796	0.000364797	Up
ATMG00110	ccb206	ATMG00110	1.43779	0.0303104	Up
AT5G27930	AT5G27930	AT5G27930	1.43693	1.9e-06	Up
AT3G15352	COX17	AT3G15352	1.43544	0.00114938	Up
AT2G43375	AT2G43375	AT2G43375	1.43503	0.0182153	Up
AT3G07230	AT3G07230	AT3G07230	1.43421	5.21e-07	Up
AT2G28720	AT2G28720	AT2G28720	1.43365	0.0248856	Up
AT4G30240	AT4G30240	AT4G30240	1.43326	8.74e-06	Up
ATCG00840	rpl23 ATCG00840	ATCG00840	1.43314	0.000489033	Up
AT3G20240	AT3G20240	AT3G20240	1.43158	0.00162035	Up
AT2G42650	AT2G42650	AT2G42650	1.43058	0.0217689	Up
AT2G34260	WDR55	AT2G34260	1.42933	0.00334661	Up
ATCG01300	rpl23 ATCG01300	ATCG01300	1.4286	0.000497381	Up
AT1G30960	AT1G30960	AT1G30960	1.42836	0.0182862	Up
AT2G45860	AT2G45860	AT2G45860	1.42771	1.13e-05	Up
AT5G51390	AT5G51390	AT5G51390	1.42567	0.033346	Up
AT3G19150	KRP6	AT3G19150	1.42548	0.00679451	Up
AT5G55920	OLI2	AT5G55920	1.42546	0.00151922	Up
AT3G12340	AT3G12340	AT3G12340	1.42532	0.0186744	Up
AT1G08410	AT1G08410	AT1G08410	1.4245	0.0222106	Up
AT1G25211	AT1G25211	AT1G25211	1.42393	0.00154934	Up
AT3G12270	PRMT3	AT3G12270	1.42322	0.0291233	Up
AT3G08520	AT3G08520	AT3G08520	1.42229	0.00178769	Up
ATCG00540	petA	ATCG00540	1.42085	0.00242875	Up
AT4G00620	EMB3127	AT4G00620	1.41947	0.000768344	Up
AT5G07350	Tudor1	AT5G07350	1.41835	4.76e-06	Up
AT5G37530	AT5G37530	AT5G37530	1.41806	0.0127189	Up
AT1G49410	TOM6	AT1G49410	1.41374	1.95e-06	Up
AT5G39760	HB23	AT5G39760	1.41327	0.000490755	Up
AT4G39300	AT4G39300	AT4G39300	1.41161	0.000113412	Up
AT1G23280	AT1G23280	AT1G23280	1.4106	0.00984268	Up
AT3G07050	NSN1	AT3G07050	1.41006	0.0296255	Up
AT1G62540	FMO GS-OX2	AT1G62540	1.40982	0.0455146	Up
AT2G42280	FBH4	AT2G42280	1.40761	0.00804478	Up
AT3G55340	PHIP1	AT3G55340	1.40701	0.00387028	Up
AT3G44590	AT3G44590	AT3G44590	1.40684	0.0054778	Up
ATCG00470	atpE	ATCG00470	1.40551	0.00110883	Up
AT5G58690	PLC5	AT5G58690	1.40471	0.0275213	Up
AT5G10750	AT5G10750	AT5G10750	1.40226	8.79e-05	Up
AT2G27710	AT2G27710	AT2G27710	1.40186	0.00110329	Up
AT5G08610	PDE340	AT5G08610	1.40116	0.039142	Up
AT3G47620	TCP14	AT3G47620	1.40116	2.59e-08	Up
AT1G79150	AT1G79150	AT1G79150	1.40069	0.00898006	Up
AT3G18530	AT3G18530	AT3G18530	1.3997	0.00577046	Up
ATCG00300	psbZ	ATCG00300	1.39967	0.0187469	Up
AT1G78600	LZF1	AT1G78600	1.39647	0.00878682	Up
AT5G62980	FOLB2	AT5G62980	1.39364	0.00789553	Up
AT3G10960	AZG1	AT3G10960	1.3931	0.0409356	Up
AT2G33380	RD20	AT2G33380	1.39306	0.0338672	Up
AT3G55350	AT3G55350	AT3G55350	1.39296	0.000176022	Up
AT5G46240	KAT1	AT5G46240	1.39081	0.0337121	Up
AT1G29418	AT1G29418	AT1G29418	1.38971	0.00161703	Up
AT5G27750	AT5G27750	AT5G27750	1.38859	0.0121038	Up
AT1G66830	AT1G66830	AT1G66830	1.3883	0.0286297	Up
AT1G11580	PMEPCRA	AT1G11580	1.38679	0.0299847	Up
AT4G40070	AT4G40070	AT4G40070	1.38571	0.0482831	Up
AT3G27550	AT3G27550	AT3G27550	1.38565	0.00859074	Up
AT3G51970	ASAT1	AT3G51970	1.38541	0.00674151	Up
AT4G39190	AT4G39190	AT4G39190	1.3843	0.00459514	Up
AT3G62860	AT3G62860	AT3G62860	1.38294	0.01981	Up
AT1G30330	ARF6	AT1G30330	1.38235	0.00536939	Up
AT5G26770	AT5G26770	AT5G26770	1.38177	0.0368818	Up
AT5G53760	MLO11	AT5G53760	1.38096	0.00835654	Up
AT5G27380	GSH2	AT5G27380	1.38048	2.62e-07	Up
AT3G22660	AT3G22660	AT3G22660	1.37938	0.0390386	Up
AT4G05440	EDA35	AT4G05440	1.37655	0.00129823	Up
AT1G16060	ADAP	AT1G16060	1.37513	0.00206281	Up
AT4G34200	EDA9	AT4G34200	1.37392	0.0173755	Up
AT2G22400	AT2G22400	AT2G22400	1.37355	0.00296426	Up
AT1G79110	BRG2	AT1G79110	1.37254	0.0010029	Up
AT2G28080	AT2G28080	AT2G28080	1.37198	0.0187469	Up
AT3G59670	AT3G59670	AT3G59670	1.37101	0.0283931	Up
AT2G21660	GRP7	AT2G21660	1.37058	0.0352226	Up
AT1G20140	SK4	AT1G20140	1.36864	0.00570761	Up
AT4G24220	VEP1	AT4G24220	1.36747	0.000147807	Up
AT5G67150	AT5G67150	AT5G67150	1.36619	0.014291	Up
AT2G07718	AT2G07718	AT2G07718	1.36559	0.000538125	Up
AT3G01800	AT3G01800	AT3G01800	1.36458	1.52e-06	Up
AT2G27200	AT2G27200	AT2G27200	1.36396	0.0450202	Up
AT3G50340	AT3G50340	AT3G50340	1.35956	0.037623	Up
AT1G28760	AT1G28760	AT1G28760	1.35939	0.0132346	Up
AT2G24100	ASG1 AT2G24100	AT2G24100	1.3588	0.000137343	Up
AT1G52280	RABG3d	AT1G52280	1.35855	0.000993622	Up
AT5G19300	AT5G19300	AT5G19300	1.35817	0.0446304	Up
AT3G49100	AT3G49100	AT3G49100	1.35717	1.34e-09	Up
AT1G17455	ELF4-L4	AT1G17455	1.35584	0.00367451	Up
AT4G15120	AT4G15120	AT4G15120	1.35472	0.0333512	Up
AT3G55390	AT3G55390	AT3G55390	1.35365	0.0357296	Up
AT5G06110	AT5G06110	AT5G06110	1.35312	0.00569765	Up
AT3G07860	AT3G07860	AT3G07860	1.35256	0.0442887	Up
ATCG00380	rps4	ATCG00380	1.35238	0.000814798	Up
AT5G49280	AT5G49280	AT5G49280	1.35165	0.010742	Up
AT2G47260	WRKY23	AT2G47260	1.34958	0.00527847	Up
AT1G68770	AT1G68770	AT1G68770	1.34946	0.000456387	Up
AT5G67280	RLK AT5G67280	AT5G67280	1.34879	0.0202669	Up
AT5G16750	TOZ	AT5G16750	1.34837	0.0268862	Up
AT1G09320	AT1G09320	AT1G09320	1.34819	0.0388071	Up
AT1G69580	AT1G69580	AT1G69580	1.34777	0.0224359	Up
AT4G27520	ENODL2	AT4G27520	1.34675	0.0278232	Up
AT1G16916	AT1G16916	AT1G16916	1.34667	4.15e-06	Up
AT3G18600	AT3G18600	AT3G18600	1.34631	0.044096	Up
AT2G25250	AT2G25250	AT2G25250	1.34598	0.000274698	Up
AT2G19490	RECA2	AT2G19490	1.34545	0.0206287	Up
AT5G15520	AT5G15520	AT5G15520	1.34516	0.00636881	Up
AT1G06233	AT1G06233	AT1G06233	1.34404	0.0378184	Up
AT1G56110	NOP56	AT1G56110	1.34389	0.0100999	Up
AT1G30240	AT1G30240	AT1G30240	1.34291	0.0251663	Up
ATCG00660	rpl20	ATCG00660	1.34164	0.0375357	Up
AT3G10113	AT3G10113	AT3G10113	1.339	0.000720805	Up
AT3G27420	AT3G27420	AT3G27420	1.33898	0.000364005	Up
AT5G57110	ACA8 AT5G57110	AT5G57110	1.3377	0.0292527	Up
AT4G29510	PRMT11	AT4G29510	1.33713	0.00093107	Up
AT1G23850	AT1G23850	AT1G23850	1.33693	0.0188682	Up
AT5G09380	AT5G09380	AT5G09380	1.33475	0.00848089	Up
AT1G06573	AT1G06573	AT1G06573	1.33462	7.12e-05	Up
AT5G43980	PDLP1	AT5G43980	1.33396	0.0050234	Up
AT4G30710	QWRF8	AT4G30710	1.33238	0.00906274	Up
AT3G48530	KING1	AT3G48530	1.33128	0.00102742	Up
AT4G02370	AT4G02370	AT4G02370	1.32981	0.000669484	Up
AT2G34900	IMB1	AT2G34900	1.32726	0.0104884	Up
AT3G11120	AT3G11120	AT3G11120	1.32667	0.00732247	Up
AT1G18745	AT1G18745	AT1G18745	1.32565	0.00148518	Up
AT4G15920	SWEET17	AT4G15920	1.32413	0.0424675	Up
AT5G06360	AT5G06360	AT5G06360	1.32377	0.000736128	Up
AT1G44780	AT1G44780	AT1G44780	1.32231	0.0053063	Up
AT5G57290	AT5G57290	AT5G57290	1.32194	0.00158197	Up
AT3G53960	AT3G53960	AT3G53960	1.32037	0.0102636	Up
AT1G64300	AT1G64300	AT1G64300	1.31936	0.0124747	Up
AT5G01850	AT5G01850	AT5G01850	1.31713	0.034264	Up
AT1G27930	AT1G27930	AT1G27930	1.31668	1e-05	Up
AT5G10290	AT5G10290	AT5G10290	1.31526	4.38e-06	Up
AT3G24100	AT3G24100	AT3G24100	1.31455	4.2e-05	Up
AT5G11240	AT5G11240	AT5G11240	1.3145	0.0287701	Up
AT5G17210	AT5G17210	AT5G17210	1.3139	0.0106323	Up
AT1G72040	dNK	AT1G72040	1.31342	0.00691432	Up
AT3G28930	AIG2	AT3G28930	1.3132	0.0126931	Up
AT1G14810	AT1G14810	AT1G14810	1.31154	0.00241644	Up
AT1G06720	AT1G06720	AT1G06720	1.30838	0.044109	Up
AT4G31810	AT4G31810	AT4G31810	1.3073	0.0384528	Up
AT2G17250	EMB2762	AT2G17250	1.30699	0.00931247	Up
AT4G01560	MEE49	AT4G01560	1.30694	0.00605839	Up
AT2G37190	AT2G37190	AT2G37190	1.30594	0.0246674	Up
AT5G06165	AT5G06165	AT5G06165	1.30552	0.0368818	Up
AT3G58840	PMD1	AT3G58840	1.30544	1.64e-05	Up
AT2G03480	QUL2	AT2G03480	1.30491	0.0209982	Up
AT5G27990	AT5G27990	AT5G27990	1.30294	0.00052443	Up
AT1G80150	AT1G80150	AT1G80150	1.30289	0.0409976	Up
ATCG00490	rbcL	ATCG00490	1.30277	0.0340933	Up
AT3G57760	AT3G57760	AT3G57760	1.30116	0.0142163	Up
AT2G30470	HSI2	AT2G30470	1.30113	5.47e-05	Up
AT5G13610	AT5G13610	AT5G13610	1.3011	1.63e-06	Up
AT1G06380	AT1G06380	AT1G06380	1.30099	0.00230872	Up
AT3G12650	AT3G12650	AT3G12650	1.30085	1.83e-06	Up
AT5G49530	AT5G49530	AT5G49530	1.29684	1.24e-06	Up
AT2G46690	AT2G46690	AT2G46690	1.29598	0.0388865	Up
AT1G28210	ATJ1	AT1G28210	1.29583	0.0119374	Up
AT1G04900	AT1G04900	AT1G04900	1.29503	0.00691432	Up
AT4G21140	AT4G21140	AT4G21140	1.29481	0.00250356	Up
AT3G56330	AT3G56330	AT3G56330	1.29339	0.0406854	Up
AT5G27395	AT5G27395	AT5G27395	1.29331	0.000959529	Up
AT4G10930	AT4G10930	AT4G10930	1.29318	0.00111509	Up
AT2G40205	AT2G40205	AT2G40205	1.29206	0.00786177	Up
AT4G09012	AT4G09012	AT4G09012	1.29131	0.0301478	Up
AT2G31060	EMB2785	AT2G31060	1.29115	0.000449565	Up
AT4G02460	PMS1	AT4G02460	1.29094	0.0386746	Up
AT3G53730	AT3G53730	AT3G53730	1.28929	0.0088227	Up
AT4G25890	AT4G25890	AT4G25890	1.28842	0.00626507	Up
AT5G62680	GTR2	AT5G62680	1.28789	0.0144513	Up
AT3G05500	AT3G05500	AT3G05500	1.28782	0.0112425	Up
AT5G59732	AT5G59732	AT5G59732	1.28724	0.0312387	Up
AT4G12600	AT4G12600	AT4G12600	1.28723	0.0426145	Up
AT1G44790	AT1G44790	AT1G44790	1.28618	2.6e-07	Up
AT2G05260	AT2G05260	AT2G05260	1.28606	0.00400209	Up
AT1G55080	MED9	AT1G55080	1.2859	0.000274698	Up
AT2G38050	DET2	AT2G38050	1.28511	0.000189298	Up
AT1G69830	AMY3	AT1G69830	1.28449	0.000251397	Up
AT2G20610	SUR1	AT2G20610	1.28436	0.00808168	Up
AT1G65030	AT1G65030	AT1G65030	1.28432	0.00775221	Up
AT4G25340	FKBP53	AT4G25340	1.28389	0.0171908	Up
ATMG00180	ccmFC	ATMG00180	1.28286	0.0236083	Up
AT2G36320	AT2G36320	AT2G36320	1.28238	0.000389595	Up
AT1G48200	AT1G48200	AT1G48200	1.28203	0.000282445	Up
AT3G02875	ILR1	AT3G02875	1.2819	0.011785	Up
AT1G68340	AT1G68340	AT1G68340	1.28058	0.0438437	Up
AT1G71850	AT1G71850	AT1G71850	1.28039	0.0384556	Up
AT3G60960	AT3G60960	AT3G60960	1.27952	0.0340933	Up
AT5G12220	AT5G12220	AT5G12220	1.27919	0.0383725	Up
AT3G58790	GAUT15	AT3G58790	1.27885	0.00888697	Up
AT3G09455	AT3G09455	AT3G09455	1.2784	0.00023541	Up
AT4G33770	AT4G33770	AT4G33770	1.27691	0.0189862	Up
AT3G49990	AT3G49990	AT3G49990	1.27483	0.000124375	Up
AT5G16910	CSLD2	AT5G16910	1.27459	0.016346	Up
AT5G28450	AT5G28450	AT5G28450	1.27449	0.000452406	Up
AT1G16790	AT1G16790	AT1G16790	1.2741	0.00611036	Up
AT5G10830	AT5G10830	AT5G10830	1.27388	0.0335569	Up
AT3G55690	AT3G55690	AT3G55690	1.27298	0.0199151	Up
AT3G59840	AT3G59840	AT3G59840	1.27144	0.000170086	Up
AT3G51320	AT3G51320	AT3G51320	1.2707	0.0290989	Up
AT1G62570	FMO GS-OX4	AT1G62570	1.26945	0.0412377	Up
AT4G16760	ACX1	AT4G16760	1.26863	0.0010403	Up
AT5G17990	TRP1 AT5G17990	AT5G17990	1.26801	0.000520002	Up
AT2G43640	AT2G43640	AT2G43640	1.26728	7.95e-06	Up
AT1G52240	ROPGEF11	AT1G52240	1.26723	0.00881115	Up
AT1G67660	AT1G67660	AT1G67660	1.26671	0.0243882	Up
AT1G20691	AT1G20691	AT1G20691	1.26614	0.00054346	Up
AT5G08500	AT5G08500	AT5G08500	1.26562	7.34e-05	Up
ATMG00410	ATMG00410	ATMG00410	1.26562	0.0225794	Up
AT5G25800	AT5G25800	AT5G25800	1.26538	0.0116118	Up
AT5G39840	AT5G39840	AT5G39840	1.26505	0.0236519	Up
AT3G16500	PAP1 AT3G16500	AT3G16500	1.26417	1.06e-06	Up
AT1G80245	AT1G80245	AT1G80245	1.26365	0.00328769	Up
AT5G57280	RID2	AT5G57280	1.26171	0.0366263	Up
AT2G44310	AT2G44310	AT2G44310	1.25684	8.51e-08	Up
AT4G00760	APRR8	AT4G00760	1.25609	0.00369842	Up
AT2G37400	AT2G37400	AT2G37400	1.25521	0.000260939	Up
AT2G19385	AT2G19385	AT2G19385	1.25473	0.0205517	Up
AT1G61580	RPL3B	AT1G61580	1.25429	0.0498275	Up
AT3G50700	IDD2	AT3G50700	1.25426	0.0159199	Up
AT2G02020	PTR4	AT2G02020	1.25363	0.0453537	Up
AT5G56950	NAP1;3	AT5G56950	1.25308	0.00576352	Up
AT5G04020	AT5G04020	AT5G04020	1.25225	0.0218238	Up
AT1G49650	AT1G49650	AT1G49650	1.25177	0.0105832	Up
AT2G24440	AT2G24440	AT2G24440	1.25056	0.0315924	Up
AT3G11964	AT3G11964	AT3G11964	1.24965	0.0205978	Up
AT5G50810	TIM8	AT5G50810	1.24858	0.000520002	Up
AT2G09990	AT2G09990	AT2G09990	1.24831	0.0020105	Up
AT2G23348	AT2G23348	AT2G23348	1.24712	0.0120635	Up
AT2G15970	COR413-PM1	AT2G15970	1.24707	0.0191904	Up
AT2G44940	AT2G44940	AT2G44940	1.2466	0.0463365	Up
AT1G21730	AT1G21730	AT1G21730	1.24453	0.0185608	Up
AT3G47960	GTR1	AT3G47960	1.24438	0.0118019	Up
AT4G03420	AT4G03420	AT4G03420	1.24421	0.0115291	Up
AT5G61810	APC1	AT5G61810	1.24313	0.00111056	Up
AT2G07741	AT2G07741	AT2G07741	1.24302	0.0265323	Up
AT1G69250	AT1G69250	AT1G69250	1.24126	5.67e-07	Up
AT1G03080	NET1D	AT1G03080	1.24039	0.000566201	Up
AT1G73480	AT1G73480	AT1G73480	1.23826	0.0290705	Up
AT3G59068	AT3G59068	AT3G59068	1.23786	0.0350238	Up
AT3G53000	PP2-A15	AT3G53000	1.23707	0.00392875	Up
AT2G34570	MEE21	AT2G34570	1.23686	0.0288468	Up
AT4G01480	PPa5	AT4G01480	1.2359	0.01751	Up
AT4G25610	AT4G25610	AT4G25610	1.23583	7.02e-06	Up
AT4G28450	AT4G28450	AT4G28450	1.23427	0.0107636	Up
AT1G77370	AT1G77370	AT1G77370	1.23364	0.00129852	Up
AT4G30935	WRKY32	AT4G30935	1.23156	0.0255932	Up
AT2G29540	RPC14	AT2G29540	1.2305	0.00766678	Up
AT4G20020	MORF1	AT4G20020	1.23045	0.0132412	Up
AT1G56045	AT1G56045	AT1G56045	1.23003	0.000644965	Up
AT2G26860	AT2G26860	AT2G26860	1.22842	0.00704722	Up
ATCG00410	ATCG00410	ATCG00410	1.22817	0.0365403	Up
AT5G24590	TIP	AT5G24590	1.22804	0.0446125	Up
AT2G40360	AT2G40360	AT2G40360	1.22653	0.0149316	Up
AT1G77540	AT1G77540	AT1G77540	1.22584	3.06e-06	Up
AT3G15460	AT3G15460	AT3G15460	1.22508	0.0122094	Up
AT4G18530	AT4G18530	AT4G18530	1.22462	0.00212863	Up
AT2G45660	AGL20	AT2G45660	1.22445	0.000500063	Up
AT2G28600	AT2G28600	AT2G28600	1.22436	0.0320129	Up
AT3G44850	AT3G44850	AT3G44850	1.22409	8.22e-05	Up
AT1G66190	AT1G66190	AT1G66190	1.22347	0.0445275	Up
AT3G18930	AT3G18930	AT3G18930	1.22268	0.00483394	Up
AT3G53940	AT3G53940	AT3G53940	1.22261	0.0430414	Up
AT5G65140	TPPJ	AT5G65140	1.22219	0.0335232	Up
AT1G29030	AT1G29030	AT1G29030	1.22182	0.0142854	Up
AT1G29250	AT1G29250	AT1G29250	1.22123	0.000819288	Up
AT2G36930	AT2G36930	AT2G36930	1.22094	0.00415589	Up
AT1G49540	ELP2	AT1G49540	1.21966	0.00539694	Up
AT3G07750	AT3G07750	AT3G07750	1.21965	0.0118071	Up
AT1G52905	AT1G52905	AT1G52905	1.21904	0.00135743	Up
AT1G80750	AT1G80750	AT1G80750	1.21896	0.0199428	Up
AT1G45163	AT1G45163	AT1G45163	1.21727	0.00549265	Up
AT3G02230	RGP1	AT3G02230	1.21373	0.00752016	Up
AT1G08220	AT1G08220	AT1G08220	1.2128	0.0036547	Up
AT3G46950	AT3G46950	AT3G46950	1.21241	0.0367185	Up
AT3G12965	AT3G12965	AT3G12965	1.21185	0.00188124	Up
AT1G69760	AT1G69760	AT1G69760	1.21164	0.00925643	Up
AT2G40430	AT2G40430	AT2G40430	1.21018	0.00296426	Up
AT2G43310	AT2G43310	AT2G43310	1.20877	0.00809414	Up
AT1G75270	DHAR2	AT1G75270	1.20842	0.00194496	Up
AT3G47510	AT3G47510	AT3G47510	1.20786	0.0182368	Up
AT3G56800	CAM3	AT3G56800	1.20689	0.004694	Up
AT1G08457	AT1G08457	AT1G08457	1.20664	0.00816667	Up
AT3G48570	AT3G48570	AT3G48570	1.20591	1.17e-06	Up
AT5G09580	AT5G09580	AT5G09580	1.20533	0.0175757	Up
AT1G63780	IMP4	AT1G63780	1.20487	0.00543892	Up
AT5G64420	AT5G64420	AT5G64420	1.20439	0.0271297	Up
AT3G16780	AT3G16780	AT3G16780	1.20415	0.0107381	Up
AT3G43810	CAM7	AT3G43810	1.20371	0.000432628	Up
AT4G35570	HMGB5	AT4G35570	1.2037	7.06e-11	Up
AT1G07780	PAI1	AT1G07780	1.2034	0.0465586	Up
AT2G33435	AT2G33435	AT2G33435	1.20296	0.00458534	Up
AT5G60910	AGL8	AT5G60910	1.2027	0.0209375	Up
AT5G64680	AT5G64680	AT5G64680	1.20253	0.00627269	Up
AT5G67630	AT5G67630	AT5G67630	1.20198	0.0135211	Up
AT4G14230	AT4G14230	AT4G14230	1.20145	0.000154673	Up
AT5G64816	AT5G64816	AT5G64816	1.1998	1.59e-05	Up
AT4G15450	AT4G15450	AT4G15450	1.19964	0.00928247	Up
AT2G07777	AT2G07777	AT2G07777	1.19904	0.0342456	Up
AT1G52160	TRZ3	AT1G52160	1.19824	0.000589464	Up
AT5G24990	AT5G24990	AT5G24990	1.19707	0.0286765	Up
AT2G23672	AT2G23672	AT2G23672	1.19678	0.00384965	Up
AT5G18820	Cpn60alpha2	AT5G18820	1.19614	0.0177941	Up
AT2G33210	HSP60-2	AT2G33210	1.19495	0.0155235	Up
AT5G05210	AT5G05210	AT5G05210	1.19465	0.000108456	Up
AT5G17190	AT5G17190	AT5G17190	1.192	1.21e-06	Up
AT3G06680	AT3G06680	AT3G06680	1.19124	0.0194947	Up
AT2G25355	AT2G25355	AT2G25355	1.18998	0.00228315	Up
AT4G34750	AT4G34750	AT4G34750	1.18995	0.0275953	Up
AT5G53070	AT5G53070	AT5G53070	1.18815	0.00118006	Up
AT5G67490	AT5G67490	AT5G67490	1.18785	0.000300641	Up
AT2G37990	AT2G37990	AT2G37990	1.18593	0.0142461	Up
AT3G18310	AT3G18310	AT3G18310	1.18419	0.00387393	Up
AT1G69360	AT1G69360	AT1G69360	1.18384	0.0290028	Up
AT1G60525	AT1G60525	AT1G60525	1.18239	0.00238512	Up
AT5G62720	AT5G62720	AT5G62720	1.18224	0.0196078	Up
AT5G02470	DPA	AT5G02470	1.18177	0.000418555	Up
AT5G52060	BAG1	AT5G52060	1.18096	0.0165753	Up
AT3G54320	WRI1	AT3G54320	1.18076	0.0366533	Up
AT1G73790	GIP2	AT1G73790	1.18033	0.000117785	Up
AT4G32720	La1	AT4G32720	1.18032	0.0331242	Up
AT3G07910	AT3G07910	AT3G07910	1.18001	6.91e-05	Up
AT3G23620	AT3G23620	AT3G23620	1.17947	0.0070977	Up
AT4G30760	AT4G30760	AT4G30760	1.17933	2.03e-07	Up
AT5G44710	AT5G44710	AT5G44710	1.17901	1.72e-08	Up
AT1G55210	AT1G55210	AT1G55210	1.17775	0.0078747	Up
AT5G61770	PPAN	AT5G61770	1.177	0.0178739	Up
AT1G09810	ECT11	AT1G09810	1.1766	9.26e-05	Up
AT1G16300	GAPCP-2	AT1G16300	1.17657	0.0438606	Up
AT3G02650	AT3G02650	AT3G02650	1.17614	2.63e-05	Up
AT5G03470	ATB' ALPHA	AT5G03470	1.17605	0.0106336	Up
AT1G49560	AT1G49560	AT1G49560	1.17596	0.0391584	Up
AT5G53590	AT5G53590	AT5G53590	1.17417	0.0109492	Up
AT5G16950	AT5G16950	AT5G16950	1.17396	3.64e-05	Up
AT1G07240	UGT71C5	AT1G07240	1.17353	0.00193491	Up
AT3G62660	GATL7	AT3G62660	1.17169	0.00123296	Up
AT3G03160	AT3G03160	AT3G03160	1.17168	1.47e-09	Up
AT4G24920	AT4G24920	AT4G24920	1.17163	0.0200713	Up
AT3G13320	CAX2	AT3G13320	1.16853	3.41e-06	Up
AT3G09720	AT3G09720	AT3G09720	1.16848	0.0400172	Up
AT1G18210	AT1G18210	AT1G18210	1.16805	0.0119658	Up
AT3G56030	AT3G56030	AT3G56030	1.16571	0.0462101	Up
AT1G13160	AT1G13160	AT1G13160	1.16542	0.0284514	Up
AT4G31820	ENP	AT4G31820	1.16504	0.00226414	Up
AT1G12830	AT1G12830	AT1G12830	1.16476	0.00605815	Up
AT3G54090	FLN1	AT3G54090	1.16246	0.0226978	Up
AT2G22910	NAGS1	AT2G22910	1.16221	0.000152924	Up
AT1G68550	CRF10	AT1G68550	1.16069	0.0398232	Up
AT5G18255	AT5G18255	AT5G18255	1.16044	0.0177593	Up
AT2G35240	MORF6	AT2G35240	1.15979	0.0011758	Up
AT1G69330	AT1G69330	AT1G69330	1.15914	2.46e-05	Up
AT2G31840	MRL7-L	AT2G31840	1.15685	0.000104169	Up
AT2G34590	AT2G34590	AT2G34590	1.15193	0.00148152	Up
AT1G53760	AT1G53760	AT1G53760	1.15166	0.0139875	Up
AT5G57120	AT5G57120	AT5G57120	1.15104	0.00111752	Up
AT5G60460	AT5G60460	AT5G60460	1.15055	0.000360754	Up
AT2G37550	AGD7	AT2G37550	1.15016	4.85e-05	Up
AT5G13340	AT5G13340	AT5G13340	1.15006	0.000106313	Up
AT3G20830	UCNL	AT3G20830	1.14999	0.0265942	Up
AT1G27760	SAT32	AT1G27760	1.14965	0.00696581	Up
AT1G72170	AT1G72170	AT1G72170	1.14565	4.25e-05	Up
AT3G16840	AT3G16840	AT3G16840	1.14564	0.0016883	Up
AT1G01500	AT1G01500	AT1G01500	1.14457	0.00673674	Up
AT5G16290	VAT1	AT5G16290	1.14322	0.000514139	Up
AT5G43680	AT5G43680	AT5G43680	1.14284	1.52e-06	Up
AT5G56680	SYNC1	AT5G56680	1.14282	0.00191341	Up
AT3G51090	AT3G51090	AT3G51090	1.14249	0.018007	Up
AT1G27350	AT1G27350	AT1G27350	1.14174	0.0160723	Up
AT5G64140	RPS28	AT5G64140	1.1411	0.00247955	Up
AT3G06868	AT3G06868	AT3G06868	1.14017	0.0318711	Up
AT3G18300	AT3G18300	AT3G18300	1.13947	0.00175915	Up
AT5G54470	BBX29	AT5G54470	1.13918	0.0314562	Up
AT5G17240	SDG40	AT5G17240	1.13912	0.0217031	Up
AT3G11450	AT3G11450	AT3G11450	1.13885	0.0165753	Up
AT4G29390	AT4G29390	AT4G29390	1.13874	6.14e-05	Up
AT1G65840	PAO4	AT1G65840	1.13766	0.0130679	Up
AT2G34357	AT2G34357	AT2G34357	1.1373	0.00307915	Up
AT1G04480	AT1G04480	AT1G04480	1.13701	0.00327666	Up
AT5G11670	NADP-ME2	AT5G11670	1.13622	0.00700007	Up
AT2G45290	AT2G45290	AT2G45290	1.13604	0.00744772	Up
AT4G01037	WTF1	AT4G01037	1.13529	0.000266578	Up
AT5G42150	AT5G42150	AT5G42150	1.13482	2.65e-05	Up
AT1G76878	AT1G76878	AT1G76878	1.13285	0.0343581	Up
AT5G18850	AT5G18850	AT5G18850	1.12713	0.0219039	Up
AT5G65020	ANNAT2	AT5G65020	1.1257	0.0275184	Up
AT5G43970	TOM22-V	AT5G43970	1.12558	0.00343489	Up
AT5G36890	BGLU42	AT5G36890	1.12548	0.00372797	Up
AT1G19990	AT1G19990	AT1G19990	1.12521	0.0218238	Up
AT3G47836	AT3G47836	AT3G47836	1.12455	1.48e-06	Up
AT3G55605	AT3G55605	AT3G55605	1.12365	0.00017379	Up
AT3G25570	AT3G25570	AT3G25570	1.12299	0.0436541	Up
AT4G34910	AT4G34910	AT4G34910	1.12198	0.00979424	Up
AT4G30930	NFD1	AT4G30930	1.12148	0.00763168	Up
AT3G44740	AT3G44740	AT3G44740	1.12076	0.0326902	Up
AT3G06300	P4H2	AT3G06300	1.11848	2.09e-06	Up
AT4G35850	AT4G35850	AT4G35850	1.11547	0.0424503	Up
AT1G10522	PRIN2	AT1G10522	1.11513	0.024353	Up
AT1G27435	AT1G27435	AT1G27435	1.11431	0.00211908	Up
ATMG00690	ATMG00690	ATMG00690	1.11349	0.0319148	Up
AT1G11240	AT1G11240	AT1G11240	1.11337	0.00118473	Up
AT1G34360	AT1G34360	AT1G34360	1.11171	0.0368379	Up
AT4G22330	ATCES1	AT4G22330	1.11147	2.3e-07	Up
AT2G22870	EMB2001	AT2G22870	1.11103	3.43e-05	Up
AT3G02490	AT3G02490	AT3G02490	1.1078	0.00277889	Up
AT1G18800	NRP2	AT1G18800	1.10549	0.00966817	Up
AT5G23250	AT5G23250	AT5G23250	1.10404	0.00307127	Up
AT1G27050	AT1G27050	AT1G27050	1.10331	0.0282813	Up
AT3G15080	AT3G15080	AT3G15080	1.10223	0.0108986	Up
AT3G02760	AT3G02760	AT3G02760	1.1022	0.00205872	Up
AT3G01280	VDAC1	AT3G01280	1.10216	6.58e-09	Up
AT1G06010	AT1G06010	AT1G06010	1.1016	7.26e-05	Up
AT5G24980	AT5G24980	AT5G24980	1.09977	0.00128026	Up
AT2G22795	AT2G22795	AT2G22795	1.09968	0.0165894	Up
AT4G38580	FP6	AT4G38580	1.09937	0.0128004	Up
AT1G65440	GTB1	AT1G65440	1.09931	0.00104658	Up
AT3G55640	AT3G55640	AT3G55640	1.0993	0.00653296	Up
AT1G13030	AT1G13030	AT1G13030	1.09836	0.0206053	Up
ATCG01050	ATCG01050	ATCG01050	1.09819	0.0162613	Up
AT3G47675	AT3G47675	AT3G47675	1.09579	0.0234746	Up
AT1G33230	AT1G33230	AT1G33230	1.09544	0.000612588	Up
AT5G18525	AT5G18525	AT5G18525	1.09497	0.0345074	Up
AT5G10700	AT5G10700	AT5G10700	1.09447	0.000517733	Up
AT5G65650	AT5G65650	AT5G65650	1.09412	0.000506575	Up
AT1G53645	AT1G53645	AT1G53645	1.0938	0.00453778	Up
AT2G25720	AT2G25720	AT2G25720	1.09211	8.67e-07	Up
AT1G64490	AT1G64490	AT1G64490	1.092	0.00742694	Up
AT4G09020	ISA3	AT4G09020	1.09085	0.0484399	Up
AT5G05710	AT5G05710	AT5G05710	1.0902	0.00173433	Up
AT3G20330	PYRB	AT3G20330	1.09002	0.00175652	Up
AT5G06210	AT5G06210	AT5G06210	1.08975	0.00922781	Up
AT5G55510	AT5G55510	AT5G55510	1.08926	0.0312387	Up
AT2G43020	PAO2	AT2G43020	1.08906	0.00703104	Up
AT3G10260	AT3G10260	AT3G10260	1.0865	0.0007825	Up
AT2G29530	TIM10	AT2G29530	1.08591	0.00189986	Up
AT3G18240	AT3G18240	AT3G18240	1.08591	0.00488862	Up
AT4G26780	AR192	AT4G26780	1.08586	0.00449589	Up
AT1G26910	RPL10B	AT1G26910	1.08486	0.0120635	Up
AT3G55410	AT3G55410	AT3G55410	1.08382	8.5e-05	Up
AT2G30880	SWAP70	AT2G30880	1.0822	0.000812082	Up
AT3G54085	AT3G54085	AT3G54085	1.08205	1.87e-07	Up
AT5G20180	AT5G20180	AT5G20180	1.08198	0.00104597	Up
AT3G11745	AT3G11745	AT3G11745	1.08134	0.00833552	Up
AT3G15095	HCF243	AT3G15095	1.07899	0.0196982	Up
AT5G59910	HTB4	AT5G59910	1.07862	0.00053476	Up
AT2G27720	AT2G27720	AT2G27720	1.0783	0.0340145	Up
AT3G03050	CSLD3	AT3G03050	1.07694	0.00381221	Up
AT5G30495	AT5G30495	AT5G30495	1.07615	0.0181464	Up
AT5G67500	VDAC2	AT5G67500	1.07591	6.58e-09	Up
AT3G18760	AT3G18760	AT3G18760	1.07513	0.00119056	Up
AT1G26340	CB5-A	AT1G26340	1.07447	5.44e-06	Up
AT5G19570	AT5G19570	AT5G19570	1.07357	0.000286588	Up
AT5G48470	AT5G48470	AT5G48470	1.07355	0.0354254	Up
AT4G27380	AT4G27380	AT4G27380	1.07332	0.00222788	Up
AT1G16740	AT1G16740	AT1G16740	1.07317	5.97e-05	Up
ATMG00480	AT2G07707 ATMG00480	ATMG00480	1.07304	0.0157165	Up
AT2G07707	AT2G07707 AT2G07707	AT2G07707	1.07304	0.0159175	Up
AT2G47420	DIM1A	AT2G47420	1.07281	0.0417242	Up
AT3G22180	AT3G22180	AT3G22180	1.07264	0.0199004	Up
AT5G23575	AT5G23575	AT5G23575	1.07209	0.000623644	Up
AT3G53630	AT3G53630	AT3G53630	1.07144	0.0150267	Up
AT5G67470	FH6	AT5G67470	1.07031	0.00537151	Up
AT1G70350	AT1G70350	AT1G70350	1.06903	0.00189986	Up
AT2G45710	AT2G45710	AT2G45710	1.06875	0.0132476	Up
AT5G11760	AT5G11760	AT5G11760	1.06841	6.64e-07	Up
AT3G27080	TOM20-3	AT3G27080	1.06676	2.17e-06	Up
AT5G63460	AT5G63460	AT5G63460	1.0661	2.81e-05	Up
AT1G32460	AT1G32460	AT1G32460	1.06594	0.015466	Up
AT1G66410	CAM4	AT1G66410	1.06588	0.000518046	Up
AT3G51270	AT3G51270	AT3G51270	1.06414	0.00113547	Up
AT3G13160	AT3G13160	AT3G13160	1.06318	0.0475624	Up
AT2G20585	NFD6	AT2G20585	1.06303	0.0100014	Up
AT3G02220	AT3G02220	AT3G02220	1.06237	0.00133456	Up
AT5G44170	AT5G44170	AT5G44170	1.06093	0.000118013	Up
AT2G24990	AT2G24990	AT2G24990	1.06022	0.0263886	Up
AT5G17930	AT5G17930	AT5G17930	1.06017	0.00453454	Up
AT2G39681	TAS2	AT2G39681	1.05913	0.0352866	Up
AT3G62920	AT3G62920	AT3G62920	1.05813	0.000810255	Up
AT5G07070	CIPK2	AT5G07070	1.05756	0.014247	Up
AT2G43460	AT2G43460	AT2G43460	1.05712	0.0141138	Up
AT1G01210	AT1G01210	AT1G01210	1.05399	0.0138304	Up
AT1G07790	HTB1	AT1G07790	1.05262	0.00149158	Up
AT2G16700	ADF5	AT2G16700	1.05025	0.028483	Up
AT3G56900	AT3G56900	AT3G56900	1.04973	0.0315583	Up
AT4G28162	AT4G28162	AT4G28162	1.04938	0.0319267	Up
AT3G52140	NOXY38	AT3G52140	1.04816	0.00674243	Up
AT3G03590	AT3G03590	AT3G03590	1.04582	0.00570382	Up
AT1G33390	FAS4	AT1G33390	1.04468	0.0195192	Up
AT3G16050	PDX1.2	AT3G16050	1.04452	0.0329364	Up
AT3G23605	AT3G23605	AT3G23605	1.04428	0.00392821	Up
AT2G46510	AIB	AT2G46510	1.04395	0.0448665	Up
AT5G63150	AT5G63150	AT5G63150	1.04329	2.94e-06	Up
AT2G07698	AT2G07698	AT2G07698	1.04291	0.0326399	Up
AT4G27620	AT4G27620	AT4G27620	1.0414	0.000311514	Up
AT2G31240	AT2G31240	AT2G31240	1.04119	0.0185478	Up
AT2G37890	AT2G37890	AT2G37890	1.03982	0.0487815	Up
AT1G48460	AT1G48460	AT1G48460	1.03768	0.01044	Up
AT5G60860	RABA1f	AT5G60860	1.03741	0.0252714	Up
AT4G15640	AT4G15640	AT4G15640	1.03734	0.0427195	Up
AT4G36420	AT4G36420	AT4G36420	1.03671	0.00402616	Up
AT1G30360	ERD4	AT1G30360	1.03569	0.0324713	Up
AT1G16430	AT1G16430	AT1G16430	1.03563	0.000133341	Up
AT4G39160	AT4G39160	AT4G39160	1.0356	0.0219705	Up
AT1G62150	AT1G62150	AT1G62150	1.03541	0.0232344	Up
AT1G29465	AT1G29465	AT1G29465	1.03533	0.00504405	Up
AT1G77750	AT1G77750	AT1G77750	1.03511	0.0234765	Up
AT1G28600	AT1G28600	AT1G28600	1.03401	0.00612382	Up
AT3G51530	AT3G51530	AT3G51530	1.03362	0.0275213	Up
AT2G46490	AT2G46490	AT2G46490	1.03342	0.00054346	Up
AT5G15750	AT5G15750	AT5G15750	1.03267	0.00328595	Up
AT5G42570	AT5G42570	AT5G42570	1.03155	0.00730168	Up
AT3G58700	AT3G58700	AT3G58700	1.03106	0.0283203	Up
AT5G14440	AT5G14440	AT5G14440	1.0309	0.000338232	Up
AT2G39390	AT2G39390	AT2G39390	1.03	0.0231426	Up
AT4G19600	CYCT1;4	AT4G19600	1.02886	0.00763389	Up
AT5G16200	AT5G16200	AT5G16200	1.02822	0.0324951	Up
AT2G43810	LSM6B	AT2G43810	1.02599	9.35e-13	Up
AT3G22942	AGG2	AT3G22942	1.0259	0.02578	Up
AT3G52070	AT3G52070	AT3G52070	1.02539	0.0447071	Up
AT5G44180	RLT2	AT5G44180	1.02436	0.0111475	Up
AT3G55740	PROT2	AT3G55740	1.02407	0.00833552	Up
AT1G09794	AT1G09794	AT1G09794	1.02381	0.014927	Up
AT1G79070	AT1G79070	AT1G79070	1.02379	3.56e-05	Up
AT1G58380	XW6	AT1G58380	1.02211	0.0271408	Up
AT1G28395	AT1G28395	AT1G28395	1.01746	0.021975	Up
AT2G14120	DRP3B	AT2G14120	1.01743	7.41e-06	Up
AT4G32400	SHS1	AT4G32400	1.01695	0.00719651	Up
AT3G19130	RBP47B	AT3G19130	1.01631	2.08e-05	Up
AT5G58730	Mik	AT5G58730	1.01557	0.013712	Up
AT1G20430	AT1G20430	AT1G20430	1.01458	0.0043278	Up
AT1G31817	NFD3	AT1G31817	1.01452	8.34e-07	Up
AT5G14105	AT5G14105	AT5G14105	1.01312	0.0233825	Up
AT2G23790	AT2G23790	AT2G23790	1.01285	0.0180648	Up
AT1G04930	AT1G04930	AT1G04930	1.01276	0.0469846	Up
AT3G55380	UBC14	AT3G55380	1.01271	7.87e-09	Up
AT3G05570	AT3G05570	AT3G05570	1.01116	8.6e-09	Up
AT3G29320	PHS1 AT3G29320	AT3G29320	1.0108	0.0348034	Up
ATCG00180	rpoC1	ATCG00180	1.01072	0.0227326	Up
AT5G60850	OBP4	AT5G60850	1.01037	0.0416301	Up
AT4G24060	AT4G24060	AT4G24060	1.01031	0.0219413	Up
AT5G18770	AT5G18770	AT5G18770	1.00973	0.0339623	Up
AT4G31780	MGD1	AT4G31780	1.00963	0.0298914	Up
AT1G29940	NRPA2	AT1G29940	1.00908	0.0465699	Up
AT3G18535	AT3G18535	AT3G18535	1.0085	9.12e-05	Up
AT1G07840	AT1G07840	AT1G07840	1.00696	0.00126573	Up
AT5G11630	NOXY2	AT5G11630	1.00653	0.000291109	Up
AT1G64105	NAC027	AT1G64105	1.00596	0.00354049	Up
AT5G41020	AT5G41020	AT5G41020	1.00458	0.0170125	Up
AT1G12310	AT1G12310	AT1G12310	1.00306	2.52e-07	Up
AT4G17060	FIP2 AT4G17060	AT4G17060	1.00298	0.00201687	Up
AT1G07830	AT1G07830	AT1G07830	1.00146	0.0118663	Up
AT5G56670	AT5G56670	AT5G56670	1.00124	0.0178206	Up
AT4G24310	AT4G24310	AT4G24310	-33.3394	8.98e-45	Down
AT3G09545	AT3G09545	AT3G09545	-24.9814	9.2e-07	Down
AT4G01430	UMAMIT29	AT4G01430	-6.07213	0.0191382	Down
AT1G56240	PP2-B13	AT1G56240	-6.01761	0.00128463	Down
AT3G52700	AT3G52700	AT3G52700	-5.98635	0.000265324	Down
AT1G21326	AT1G21326	AT1G21326	-5.86346	0.0102645	Down
AT1G21320	AT1G21320	AT1G21320	-5.82485	0.0329073	Down
AT4G11485	LCR11	AT4G11485	-5.6014	0.0144986	Down
AT5G17523	AT5G17523	AT5G17523	-5.47775	0.00325771	Down
AT1G09297	AT1G09297	AT1G09297	-5.46289	0.00127743	Down
AT1G74290	AT1G74290	AT1G74290	-5.43057	0.00227376	Down
AT4G13660	PRR2	AT4G13660	-4.92212	0.00678094	Down
AT1G01070	UMAMIT28	AT1G01070	-4.91496	0.000294707	Down
AT1G05675	AT1G05675	AT1G05675	-4.90099	0.00329634	Down
AT3G19550	AT3G19550	AT3G19550	-4.84928	0.0390421	Down
AT1G43310	AT1G43310	AT1G43310	-4.79784	0.0082178	Down
AT1G53180	AT1G53180	AT1G53180	-4.79167	0.0361565	Down
AT4G17660	AT4G17660	AT4G17660	-4.78622	0.0149316	Down
AT4G37290	AT4G37290	AT4G37290	-4.78335	0.00577046	Down
AT3G63088	RTFL14	AT3G63088	-4.74395	0.0125124	Down
AT4G33320	AT4G33320	AT4G33320	-4.6902	0.0118293	Down
AT1G75945	AT1G75945	AT1G75945	-4.68496	0.000239182	Down
AT4G38340	AT4G38340	AT4G38340	-4.59924	0.00793944	Down
AT4G13880	RLP48	AT4G13880	-4.5963	0.00705355	Down
AT2G02930	GSTF3	AT2G02930	-4.518	0.0094298	Down
AT1G21245	AT1G21245	AT1G21245	-4.48896	0.03805	Down
AT3G60940	AT3G60940	AT3G60940	-4.48448	0.0322774	Down
AT4G06598	AT4G06598	AT4G06598	-4.47371	0.00782656	Down
AT5G65080	MAF5	AT5G65080	-4.45558	0.000930745	Down
AT5G17040	AT5G17040	AT5G17040	-4.38516	0.0261054	Down
AT1G63070	AT1G63070	AT1G63070	-4.35549	0.0165962	Down
AT1G04600	XIA	AT1G04600	-4.33436	0.0399828	Down
AT4G11000	AT4G11000	AT4G11000	-4.29983	7.29e-06	Down
AT3G58780	SHP1	AT3G58780	-4.24595	6.49e-05	Down
AT4G18197	PUP7	AT4G18197	-4.21091	9.73e-08	Down
AT2G09165	AT2G09165	AT2G09165	-4.19479	0.0135839	Down
AT2G21550	AT2G21550	AT2G21550	-4.127	0.0384543	Down
AT5G17170	ENH1	AT5G17170	-4.09267	1.98e-29	Down
AT1G62914	AT1G62914	AT1G62914	-4.04943	0.0281524	Down
AT1G26790	AT1G26790	AT1G26790	-4.04755	3.68e-07	Down
AT4G14690	ELIP2	AT4G14690	-4.04022	0.000190519	Down
AT5G58360	OFP3	AT5G58360	-4.03461	0.0311376	Down
AT4G36850	AT4G36850	AT4G36850	-4.02675	0.0120635	Down
AT4G23310	CRK23	AT4G23310	-4.01683	0.0481908	Down
AT1G49200	AT1G49200	AT1G49200	-3.92368	1.34e-07	Down
AT3G15620	UVR3	AT3G15620	-3.9101	0.0350358	Down
AT1G72490	AT1G72490	AT1G72490	-3.91001	0.0434459	Down
AT5G40230	UMAMIT37	AT5G40230	-3.8978	0.00402223	Down
AT5G25470	AT5G25470	AT5G25470	-3.89113	0.0284224	Down
AT5G15830	bZIP3	AT5G15830	-3.88799	1e-06	Down
AT1G12672	AT1G12672	AT1G12672	-3.85406	0.0120824	Down
AT1G55960	AT1G55960	AT1G55960	-3.81604	2.79e-13	Down
AT1G07620	ATOBGM	AT1G07620	-3.80938	0.00177586	Down
AT1G53160	SPL4	AT1G53160	-3.80071	5.43e-06	Down
AT1G33720	CYP76C6	AT1G33720	-3.80014	0.000364743	Down
AT1G25530	AT1G25530	AT1G25530	-3.73272	3.68e-06	Down
AT3G02500	AT3G02500	AT3G02500	-3.73175	0.0137175	Down
AT3G23230	TDR1	AT3G23230	-3.71569	0.0430414	Down
AT2G41080	AT2G41080	AT2G41080	-3.6931	0.001829	Down
AT1G09257	AT1G09257	AT1G09257	-3.69232	0.0459141	Down
AT4G08300	UMAMIT17	AT4G08300	-3.68938	0.0119422	Down
AT5G09220	AAP2	AT5G09220	-3.68632	0.00272771	Down
AT4G30290	XTH19	AT4G30290	-3.68467	0.000283929	Down
AT5G42830	AT5G42830	AT5G42830	-3.65045	0.00330155	Down
AT2G44380	AT2G44380	AT2G44380	-3.64256	0.0114162	Down
AT5G40800	AT5G40800	AT5G40800	-3.63542	0.0499395	Down
AT1G01060	LHY	AT1G01060	-3.61514	1.21e-49	Down
AT1G20190	EXPA11	AT1G20190	-3.56632	1.93e-05	Down
AT1G17250	RLP3	AT1G17250	-3.55524	0.0331161	Down
AT3G26760	AT3G26760	AT3G26760	-3.52955	0.0318819	Down
AT3G26230	CYP71B24	AT3G26230	-3.52067	2.09e-05	Down
AT4G14130	XTH15	AT4G14130	-3.43131	0.0268299	Down
AT1G64570	DUO3	AT1G64570	-3.42891	0.0144962	Down
AT1G07900	LBD1	AT1G07900	-3.41975	0.0138299	Down
AT4G28270	RMA2	AT4G28270	-3.39503	8.19e-06	Down
AT2G41250	AT2G41250	AT2G41250	-3.39354	6.64e-07	Down
AT4G23180	CRK10	AT4G23180	-3.38152	4.61e-06	Down
AT4G20820	AT4G20820	AT4G20820	-3.38145	0.0328143	Down
AT1G48605	ATHAL3B	AT1G48605	-3.35815	0.000588894	Down
AT5G10250	DOT3	AT5G10250	-3.35714	0.0257304	Down
AT1G07390	RLP1	AT1G07390	-3.34902	1.2e-05	Down
AT4G33790	CER4	AT4G33790	-3.33487	0.0373871	Down
AT5G20400	AT5G20400	AT5G20400	-3.33413	0.0260735	Down
AT2G37460	UMAMIT12	AT2G37460	-3.31936	0.000109495	Down
AT5G18670	BMY3	AT5G18670	-3.31226	1.12e-15	Down
AT3G24450	AT3G24450	AT3G24450	-3.30597	0.00434278	Down
AT2G14610	PR1	AT2G14610	-3.30017	0.0381333	Down
AT1G74670	GASA6	AT1G74670	-3.2899	0.008735	Down
AT4G02520	GSTF2	AT4G02520	-3.28716	3.55e-05	Down
AT1G02190	AT1G02190	AT1G02190	-3.2713	0.0387287	Down
AT2G33640	AT2G33640	AT2G33640	-3.26708	0.0445275	Down
AT1G16130	WAKL2	AT1G16130	-3.24348	0.0411541	Down
AT2G05160	AT2G05160	AT2G05160	-3.23117	0.00167902	Down
AT3G10150	PAP16	AT3G10150	-3.22642	3.9e-05	Down
AT5G25190	ESE3	AT5G25190	-3.2178	7.59e-06	Down
AT2G27420	AT2G27420	AT2G27420	-3.20585	0.000147818	Down
AT4G31440	AT4G31440	AT4G31440	-3.1879	0.012936	Down
AT3G25010	RLP41	AT3G25010	-3.17467	0.0182368	Down
AT5G45310	AT5G45310	AT5G45310	-3.16661	0.00095932	Down
AT5G11250	AT5G11250	AT5G11250	-3.16156	1.19e-07	Down
AT4G20110	VSR7	AT4G20110	-3.14783	0.00492844	Down
AT4G10120	ATSPS4F	AT4G10120	-3.14481	1.41e-06	Down
AT1G17147	AT1G17147	AT1G17147	-3.09873	0.010044	Down
AT4G27450	AT4G27450	AT4G27450	-3.09342	0.000232415	Down
AT2G41510	CKX1	AT2G41510	-3.08682	0.00353011	Down
AT1G13700	PGL1	AT1G13700	-3.08497	0.000467635	Down
AT3G44900	CHX4	AT3G44900	-3.0731	0.0383045	Down
AT1G17610	AT1G17610	AT1G17610	-3.0727	2.43e-07	Down
AT1G57980	AT1G57980	AT1G57980	-3.02748	7.65e-06	Down
AT1G02850	BGLU11	AT1G02850	-3.0247	0.00137195	Down
AT1G01520	ASG4	AT1G01520	-3.01465	1.33e-06	Down
AT3G13065	SRF4	AT3G13065	-3.00958	0.00890958	Down
AT1G55980	AT1G55980	AT1G55980	-2.99226	1.83e-05	Down
AT3G52720	ACA1 AT3G52720	AT3G52720	-2.98546	4.1e-08	Down
AT1G80440	AT1G80440	AT1G80440	-2.98007	0.0011164	Down
AT4G38560	AT4G38560	AT4G38560	-2.97712	0.0177767	Down
AT2G46440	CNGC11	AT2G46440	-2.96653	4.96e-06	Down
AT4G32460	AT4G32460	AT4G32460	-2.96107	0.00247261	Down
AT3G51330	AT3G51330	AT3G51330	-2.95178	0.00738328	Down
AT2G14560	LURP1	AT2G14560	-2.94886	0.0400797	Down
AT4G04125	ath-MIR2936	AT4G04125	-2.94857	0.0205517	Down
AT1G35170	AT1G35170	AT1G35170	-2.94151	0.0270625	Down
AT2G28160	FRU	AT2G28160	-2.93459	0.00074945	Down
AT3G51860	CAX3	AT3G51860	-2.93283	0.00760179	Down
AT5G57320	VLN5	AT5G57320	-2.92635	0.0112718	Down
AT3G48360	BT2	AT3G48360	-2.92349	0.0431675	Down
AT4G22410	AT4G22410	AT4G22410	-2.91291	0.0214665	Down
AT1G21140	AT1G21140	AT1G21140	-2.91254	0.00271785	Down
AT3G05345	AT3G05345	AT3G05345	-2.90657	2.85e-13	Down
AT5G15581	AT5G15581	AT5G15581	-2.90135	0.0467547	Down
AT5G49360	BXL1	AT5G49360	-2.89906	0.00201771	Down
AT4G21745	AT4G21745	AT4G21745	-2.88804	0.0252714	Down
AT1G76930	EXT4	AT1G76930	-2.88369	0.0278468	Down
AT2G38790	AT2G38790	AT2G38790	-2.88018	0.00162698	Down
AT5G14640	SK13 AT5G14640	AT5G14640	-2.87908	1.36e-10	Down
AT5G27420	CNI1	AT5G27420	-2.86731	0.0207993	Down
AT1G18880	NRT1.9	AT1G18880	-2.84355	2.42e-05	Down
AT5G08185	ath-MIR162a	AT5G08185	-2.84108	0.0246181	Down
AT4G30110	HMA2	AT4G30110	-2.83459	0.000609728	Down
AT5G59670	AT5G59670	AT5G59670	-2.8283	0.000355546	Down
AT1G23050	AT1G23050	AT1G23050	-2.82315	0.00441305	Down
AT2G05380	GRP3S	AT2G05380	-2.81602	0.000278764	Down
AT2G17040	NAC036	AT2G17040	-2.80526	0.00353738	Down
AT5G22460	AT5G22460	AT5G22460	-2.80424	0.000186963	Down
AT1G13470	AT1G13470	AT1G13470	-2.80417	0.0190265	Down
AT1G14205	AT1G14205	AT1G14205	-2.80168	0.00651883	Down
AT5G03355	AT5G03355	AT5G03355	-2.7816	0.0192786	Down
AT2G33060	RLP27	AT2G33060	-2.77584	0.000332927	Down
AT3G48640	AT3G48640	AT3G48640	-2.77299	0.030622	Down
AT2G29300	AT2G29300	AT2G29300	-2.75496	3.91e-05	Down
AT1G67910	AT1G67910	AT1G67910	-2.75176	1.98e-09	Down
AT5G17780	AT5G17780	AT5G17780	-2.74538	0.0341361	Down
AT2G16060	HB1	AT2G16060	-2.74197	0.0063526	Down
AT4G08290	UMAMIT20	AT4G08290	-2.74175	0.0354364	Down
AT3G53235	AT3G53235	AT3G53235	-2.73592	0.00238706	Down
AT3G46600	AT3G46600	AT3G46600	-2.72852	0.000596892	Down
AT5G47560	TDT	AT5G47560	-2.72533	6.14e-05	Down
AT5G19840	AT5G19840	AT5G19840	-2.72028	0.024133	Down
AT3G09020	AT3G09020	AT3G09020	-2.72026	0.044096	Down
AT1G17990	AT1G17990	AT1G17990	-2.70364	2.76e-08	Down
AT4G23320	CRK24	AT4G23320	-2.70101	0.012139	Down
AT1G18020	AT1G18020	AT1G18020	-2.68992	4.65e-08	Down
AT1G79700	WRI4	AT1G79700	-2.68757	3.04e-05	Down
AT2G35950	EDA12	AT2G35950	-2.68201	0.00920266	Down
AT2G38470	WRKY33	AT2G38470	-2.6702	0.0245694	Down
AT1G59590	ZCF37	AT1G59590	-2.66879	0.0247988	Down
AT4G01030	AT4G01030	AT4G01030	-2.66727	0.0220663	Down
AT1G56720	AT1G56720	AT1G56720	-2.66069	0.00218714	Down
AT4G08040	ACS11	AT4G08040	-2.65872	0.0271952	Down
AT2G32680	RLP23	AT2G32680	-2.6573	0.011002	Down
AT1G54740	AT1G54740	AT1G54740	-2.65517	1.62e-06	Down
AT5G67450	ZF1	AT5G67450	-2.651	0.025165	Down
AT4G01450	UMAMIT30	AT4G01450	-2.63475	7.09e-06	Down
AT1G17600	AT1G17600	AT1G17600	-2.63008	0.00215727	Down
AT1G01340	CNGC10	AT1G01340	-2.62982	0.0310947	Down
AT4G14400	ACD6	AT4G14400	-2.62334	0.000190646	Down
AT5G06470	AT5G06470	AT5G06470	-2.60921	0.00450044	Down
AT5G02690	AT5G02690	AT5G02690	-2.60764	0.0290013	Down
AT5G25130	CYP71B12	AT5G25130	-2.60637	5.83e-05	Down
AT3G24460	AT3G24460	AT3G24460	-2.59854	0.000403203	Down
AT5G42760	AT5G42760	AT5G42760	-2.58111	1.22e-06	Down
AT5G42680	AT5G42680	AT5G42680	-2.58071	2.05e-05	Down
AT5G49730	FRO6	AT5G49730	-2.57618	2.02e-05	Down
AT5G41750	AT5G41750	AT5G41750	-2.57613	0.023459	Down
AT4G34600	AT4G34600	AT4G34600	-2.5748	0.00929764	Down
AT1G10155	PP2-A10	AT1G10155	-2.56155	0.00507908	Down
AT1G76800	AT1G76800	AT1G76800	-2.56109	0.000231317	Down
AT4G16690	MES16	AT4G16690	-2.54597	1.39e-06	Down
AT1G35710	AT1G35710	AT1G35710	-2.54557	0.00764216	Down
AT2G28630	KCS12	AT2G28630	-2.53292	0.00920266	Down
AT2G21260	AT2G21260	AT2G21260	-2.52384	0.0132346	Down
AT2G43570	CHI	AT2G43570	-2.5177	0.0330803	Down
AT5G61590	AT5G61590	AT5G61590	-2.51755	0.00187587	Down
AT5G54610	ANK	AT5G54610	-2.51699	0.00698338	Down
AT4G39120	IMPL2	AT4G39120	-2.51559	1.82e-08	Down
AT4G01600	AT4G01600	AT4G01600	-2.50709	0.00281441	Down
AT1G28670	ARAB-1	AT1G28670	-2.50422	1.01e-09	Down
AT3G29240	AT3G29240	AT3G29240	-2.4985	0.000190519	Down
AT5G26200	AT5G26200	AT5G26200	-2.4946	2.04e-05	Down
AT3G25020	RLP42	AT3G25020	-2.48943	0.0206171	Down
AT5G02020	SIS	AT5G02020	-2.48256	0.0146679	Down
AT1G28660	AT1G28660	AT1G28660	-2.48019	0.000879248	Down
AT4G35440	CLC-E	AT4G35440	-2.4682	2.53e-07	Down
AT1G04220	KCS2	AT1G04220	-2.46093	0.00237646	Down
AT4G37100	AT4G37100	AT4G37100	-2.45333	2.29e-05	Down
AT1G02420	AT1G02420	AT1G02420	-2.45167	0.0418372	Down
AT4G18205	AT4G18205	AT4G18205	-2.45047	0.00505745	Down
AT1G25988	AT1G25988	AT1G25988	-2.44303	0.0121899	Down
AT1G68030	AT1G68030	AT1G68030	-2.44283	0.0402044	Down
AT3G30460	AT3G30460	AT3G30460	-2.43748	0.000113618	Down
AT4G01910	AT4G01910	AT4G01910	-2.43481	0.00432049	Down
AT5G53370	PMEPCRF	AT5G53370	-2.43279	2.94e-06	Down
AT3G23120	RLP38	AT3G23120	-2.43223	0.00952631	Down
AT3G02410	ICME-LIKE2	AT3G02410	-2.43219	0.00999236	Down
AT3G13061	AT3G13061	AT3G13061	-2.42913	0.00783189	Down
AT2G18120	SRS4	AT2G18120	-2.42863	0.0210542	Down
AT5G50240	PIMT2	AT5G50240	-2.42772	1.4e-05	Down
AT1G23870	TPS9	AT1G23870	-2.4226	0.00085693	Down
AT1G55320	AAE18	AT1G55320	-2.422	0.000455196	Down
AT5G28010	AT5G28010	AT5G28010	-2.41636	0.0372017	Down
AT1G07380	AT1G07380	AT1G07380	-2.4093	1.43e-05	Down
AT3G26220	CYP71B3	AT3G26220	-2.40502	0.0261054	Down
AT5G14780	FDH	AT5G14780	-2.39313	1e-06	Down
AT1G23052	AT1G23052	AT1G23052	-2.39265	0.0160723	Down
AT3G51238	AT3G51238	AT3G51238	-2.38324	0.042071	Down
AT1G58520	AT1G58525 AT1G58520	AT1G58520	-2.37114	1.12e-07	Down
AT4G10310	HKT1	AT4G10310	-2.36745	0.0165989	Down
AT1G23140	AT1G23140	AT1G23140	-2.36619	0.00312123	Down
AT4G03450	AT4G03450	AT4G03450	-2.36258	0.0469846	Down
AT4G02050	STP7	AT4G02050	-2.36197	0.00045851	Down
AT5G39670	AT5G39670	AT5G39670	-2.34623	0.0401813	Down
AT1G49430	LACS2	AT1G49430	-2.3386	0.0060164	Down
AT3G07340	AT3G07340	AT3G07340	-2.33838	0.00149542	Down
AT1G32450	NRT1.5	AT1G32450	-2.3338	0.00643077	Down
AT5G19970	AT5G19970	AT5G19970	-2.33203	0.00401864	Down
AT4G33540	AT4G33540	AT4G33540	-2.32543	0.000551413	Down
AT2G20142	AT2G20142	AT2G20142	-2.31905	0.0384796	Down
AT1G73830	BEE3	AT1G73830	-2.31721	0.0230717	Down
AT5G66480	AT5G66480	AT5G66480	-2.31607	0.0451478	Down
AT1G49470	AT1G49470	AT1G49470	-2.31404	0.00103166	Down
AT2G28940	AT2G28940	AT2G28940	-2.29958	0.000289301	Down
AT2G18210	AT2G18210	AT2G18210	-2.29673	0.0439365	Down
AT3G26240	AT3G26240	AT3G26240	-2.29512	4.63e-11	Down
AT3G22930	CML11	AT3G22930	-2.29428	0.0112939	Down
AT2G39800	P5CS1	AT2G39800	-2.29304	0.00145028	Down
AT2G47780	AT2G47780	AT2G47780	-2.28683	0.000426757	Down
AT5G24210	AT5G24210	AT5G24210	-2.27379	0.0090731	Down
AT2G20550	AT2G20550	AT2G20550	-2.27048	0.000155133	Down
AT3G17700	CNBT1	AT3G17700	-2.27	0.000155302	Down
AT4G02330	ATPMEPCRB	AT4G02330	-2.26008	0.016748	Down
AT4G23610	AT4G23610	AT4G23610	-2.26004	0.0415059	Down
AT1G27060	AT1G27060	AT1G27060	-2.24944	0.000679468	Down
AT1G33475	AT1G33475	AT1G33475	-2.24821	0.00206943	Down
AT5G36930	AT5G36930	AT5G36930	-2.24599	6.94e-06	Down
AT4G23730	AT4G23730	AT4G23730	-2.24439	1.33e-11	Down
AT5G54510	DFL1	AT5G54510	-2.24339	0.040343	Down
AT1G08570	ACHT4	AT1G08570	-2.24258	9.97e-08	Down
AT1G24580	AT1G24580	AT1G24580	-2.23922	0.0482564	Down
AT1G56540	AT1G56540	AT1G56540	-2.23026	0.00885367	Down
AT1G23830	AT1G23830	AT1G23830	-2.22954	0.000842568	Down
AT4G34970	ADF9	AT4G34970	-2.22783	0.0351286	Down
AT1G73805	SARD1	AT1G73805	-2.22593	0.0362414	Down
AT3G62070	AT3G62070	AT3G62070	-2.22345	0.000847463	Down
AT1G55450	AT1G55450	AT1G55450	-2.21653	0.00458534	Down
AT4G01920	AT4G01920	AT4G01920	-2.21225	0.000542435	Down
AT1G66910	AT1G66910	AT1G66910	-2.20926	2.89e-07	Down
ATCG00750	rps11	ATCG00750	-2.2017	4.81e-14	Down
AT1G05630	5PTASE13	AT1G05630	-2.20146	0.000202201	Down
AT1G29660	AT1G29660	AT1G29660	-2.2009	0.0117185	Down
AT3G11010	RLP34	AT3G11010	-2.19533	0.0420365	Down
AT1G64400	LACS3	AT1G64400	-2.19407	1.34e-06	Down
AT1G01390	AT1G01390	AT1G01390	-2.19236	0.0341785	Down
AT3G52310	AT3G52310	AT3G52310	-2.18937	0.0240361	Down
AT5G24120	SIGE	AT5G24120	-2.18373	0.000588047	Down
AT1G33700	AT1G33700	AT1G33700	-2.18056	0.00343489	Down
AT1G30900	VSR6	AT1G30900	-2.17819	0.0321704	Down
AT2G24300	AT2G24300	AT2G24300	-2.17633	0.0273915	Down
AT1G78180	AT1G78180	AT1G78180	-2.17294	3.71e-09	Down
AT1G20120	AT1G20120	AT1G20120	-2.1719	0.0375773	Down
AT1G28380	NSL1	AT1G28380	-2.17027	0.000500063	Down
AT1G15740	AT1G15740	AT1G15740	-2.16618	0.000316898	Down
AT5G55380	AT5G55380	AT5G55380	-2.16331	0.000232415	Down
AT5G19120	AT5G19120	AT5G19120	-2.16273	0.00890958	Down
AT3G14620	CYP72A8	AT3G14620	-2.15872	0.00348432	Down
AT2G46430	CNGC3	AT2G46430	-2.15813	0.00281071	Down
AT3G09595	AT3G09595	AT3G09595	-2.15659	0.0312935	Down
AT2G22240	MIPS2	AT2G22240	-2.15239	7.88e-05	Down
AT2G32960	PFA-DSP2	AT2G32960	-2.15114	0.000593546	Down
AT3G02380	COL2	AT3G02380	-2.14756	4e-08	Down
AT5G66600	AT5G66600	AT5G66600	-2.14705	0.000497035	Down
AT5G03552	ath-MIR822	AT5G03552	-2.14619	0.0119422	Down
AT1G65790	RK1	AT1G65790	-2.14034	0.0208133	Down
AT3G46130	MYB48	AT3G46130	-2.13972	0.0211594	Down
AT4G04630	AT4G04630	AT4G04630	-2.13822	0.00164887	Down
AT4G27030	FADA	AT4G27030	-2.13519	1.62e-12	Down
AT5G47960	RABA4C	AT5G47960	-2.1342	0.0367048	Down
AT3G22420	WNK2	AT3G22420	-2.13095	2.01e-14	Down
AT1G24147	AT1G24147	AT1G24147	-2.13011	0.0345262	Down
AT5G56550	OXS3	AT5G56550	-2.12471	0.00127743	Down
AT1G55970	HAC4	AT1G55970	-2.12329	0.00488862	Down
AT1G07010	SLP1	AT1G07010	-2.1226	3.25e-18	Down
AT4G37310	CYP81H1	AT4G37310	-2.11983	5.76e-06	Down
AT3G07540	AT3G07540	AT3G07540	-2.11924	0.014927	Down
AT3G16910	AAE7	AT3G16910	-2.11715	3.03e-11	Down
AT1G16720	HCF173	AT1G16720	-2.11572	6.42e-06	Down
AT3G02170	LNG2	AT3G02170	-2.1151	4.92e-05	Down
AT4G00755	AT4G00755	AT4G00755	-2.11352	5.07e-06	Down
AT4G23230	CRK15	AT4G23230	-2.10476	0.0397795	Down
AT1G65490	AT1G65490	AT1G65490	-2.10365	0.00357332	Down
AT1G70520	CRK2	AT1G70520	-2.10348	4.57e-05	Down
AT3G21150	BBX32	AT3G21150	-2.10139	0.000405314	Down
AT4G30470	AT4G30470	AT4G30470	-2.10132	5.08e-05	Down
AT5G53970	TAT7	AT5G53970	-2.09973	2.81e-07	Down
ATCG00290	ATCG00290	ATCG00290	-2.09451	1.29e-06	Down
AT1G16780	VHP2;2	AT1G16780	-2.0898	0.000818266	Down
AT5G47230	ERF5	AT5G47230	-2.08875	0.0400243	Down
AT3G23010	RLP36	AT3G23010	-2.08193	0.0136399	Down
AT4G28390	AAC3	AT4G28390	-2.08193	0.00691432	Down
AT3G10420	SPD1	AT3G10420	-2.07889	0.000463191	Down
AT4G01740	AT4G01740	AT4G01740	-2.0779	0.00600918	Down
AT5G22690	AT5G22690	AT5G22690	-2.06949	0.012771	Down
AT3G43920	DCL3	AT3G43920	-2.06922	0.00589706	Down
AT2G22420	AT2G22420	AT2G22420	-2.06575	0.00169484	Down
AT1G34640	AT1G34640	AT1G34640	-2.06473	8.86e-06	Down
AT4G35430	AT4G35430	AT4G35430	-2.06237	7.91e-05	Down
AT4G09970	AT4G09970	AT4G09970	-2.06014	6.36e-06	Down
AT3G04210	AT3G04210	AT3G04210	-2.06008	0.0198523	Down
AT1G58030	CAT2 AT1G58030	AT1G58030	-2.05972	7.74e-06	Down
AT1G74875	AT1G74875	AT1G74875	-2.05965	0.00215981	Down
AT4G14750	IQD19	AT4G14750	-2.05745	0.0116989	Down
AT2G18700	TPS11	AT2G18700	-2.04999	0.011832	Down
AT2G34150	AT2G34150	AT2G34150	-2.04531	0.0454331	Down
AT3G51710	AT3G51710	AT3G51710	-2.03796	0.0225627	Down
AT5G02290	NAK	AT5G02290	-2.03196	0.00010958	Down
AT2G24280	AT2G24280	AT2G24280	-2.03195	1.34e-07	Down
[truncated: 1,013 more rows]

## Sheet: rbohD rbohF_vs_Col-0
User_ID	symbol	ensembl_ID	rbohDFMock-Col0Mock_log2FC	rbohDFMock-Col0Mock_adjPval	Direction
AT1G70440	SRO3	AT1G70440	42.6096	2.62e-81	Up
AT5G36970	NHL25	AT5G36970	35.8448	5.06e-32	Up
AT2G18190	AT2G18190	AT2G18190	34.6742	1.52e-41	Up
AT4G08570	AT4G08570	AT4G08570	11.6745	1.01e-11	Up
AT1G52690	LEA7	AT1G52690	10.6655	1.56e-06	Up
AT5G52300	LTI65	AT5G52300	10.2484	9.9e-10	Up
AT4G01380	AT4G01380	AT4G01380	10.2304	2.37e-07	Up
AT1G47395	AT1G47395	AT1G47395	9.83944	6.96e-05	Up
AT4G01390	AT4G01390	AT4G01390	9.69783	1.13e-05	Up
AT5G43840	HSFA6A	AT5G43840	9.41183	8.89e-06	Up
AT1G48000	MYB112	AT1G48000	8.84995	1.41e-06	Up
AT5G15500	AT5G15500	AT5G15500	8.79615	8.06e-14	Up
AT3G50980	XERO1	AT3G50980	8.6314	0.00162315	Up
AT1G64110	DAA1	AT1G64110	8.59354	6.37e-05	Up
AT2G35070	AT2G35070	AT2G35070	8.59336	1.57e-08	Up
AT5G50360	AT5G50360	AT5G50360	8.18887	0.000109338	Up
AT4G09600	GASA3	AT4G09600	8.05766	0.000152189	Up
AT1G47400	AT1G47400	AT1G47400	7.91325	0.000167347	Up
AT2G18050	HIS1-3	AT2G18050	7.84858	2.34e-13	Up
AT5G40790	AT5G40790	AT5G40790	7.82819	0.000266608	Up
AT2G30766	AT2G30766	AT2G30766	7.80639	7.39e-07	Up
AT3G02480	AT3G02480	AT3G02480	7.7248	4.3e-06	Up
AT3G17520	AT3G17520	AT3G17520	7.67554	0.000379614	Up
AT3G09260	PYK10	AT3G09260	7.65364	0.00229721	Up
AT5G13170	SAG29	AT5G13170	7.63183	5.36e-12	Up
AT2G47770	TSPO	AT2G47770	7.60716	4.78e-08	Up
AT5G04150	BHLH101	AT5G04150	7.42568	0.0149904	Up
AT1G22990	HIPP22	AT1G22990	7.40561	0.00124724	Up
AT3G08860	PYD4	AT3G08860	7.36967	0.00120026	Up
AT5G59320	LTP3	AT5G59320	7.27708	6.81e-11	Up
AT2G25625	AT2G25625	AT2G25625	7.27033	1.69e-06	Up
AT5G24090	CHIA	AT5G24090	7.20012	6.09e-05	Up
AT5G05250	AT5G05250	AT5G05250	7.10067	5.44e-06	Up
AT1G80160	GLYI7	AT1G80160	7.08684	0.00026623	Up
AT5G62040	BFT	AT5G62040	7.03452	5.52e-05	Up
AT5G42800	DFR	AT5G42800	7.00551	0.00210005	Up
AT4G01985	AT4G01985	AT4G01985	6.94051	6.02e-05	Up
AT1G03940	AT1G03940	AT1G03940	6.882	0.00149628	Up
AT3G26460	AT3G26460	AT3G26460	6.84307	2.44e-05	Up
AT1G66390	MYB90	AT1G66390	6.82674	1.52e-05	Up
AT1G22480	AT1G22480	AT1G22480	6.78047	0.000945973	Up
AT3G28300	AT14A AT3G28300	AT3G28300	6.69579	2.37e-07	Up
AT3G28290	AT14A AT3G28290	AT3G28290	6.69579	2.37e-07	Up
AT1G68825	RTFL15	AT1G68825	6.69148	0.000795665	Up
AT2G18196	AT2G18196	AT2G18196	6.53894	0.000129617	Up
AT1G07430	HAI2	AT1G07430	6.4863	3.99e-11	Up
AT4G22880	LDOX	AT4G22880	6.43653	0.000665018	Up
AT3G24750	AT3G24750	AT3G24750	6.43437	0.00162155	Up
AT2G14247	AT2G14247	AT2G14247	6.42905	0.0189508	Up
AT5G19470	NUDT24	AT5G19470	6.42749	1.35e-05	Up
AT4G33467	AT4G33467	AT4G33467	6.36621	0.0060925	Up
AT3G46900	COPT2	AT3G46900	6.35974	9.79e-06	Up
AT3G62990	AT3G62990	AT3G62990	6.29139	0.00151005	Up
AT5G58660	AT5G58660	AT5G58660	6.21024	0.00218929	Up
AT2G43580	AT2G43580	AT2G43580	6.16155	8.06e-06	Up
AT4G25100	FSD1	AT4G25100	6.12128	1.46e-05	Up
AT2G29950	ELF4-L1	AT2G29950	6.11235	2.75e-08	Up
AT5G42290	AT5G42290	AT5G42290	6.11203	0.0199292	Up
AT3G56980	bHLH39	AT3G56980	6.09319	0.0320131	Up
AT5G17220	GSTF12	AT5G17220	6.09264	0.000266608	Up
AT5G25110	CIPK25	AT5G25110	5.95351	0.00213623	Up
AT5G03210	DIP2	AT5G03210	5.94653	1.78e-06	Up
AT1G73330	DR4	AT1G73330	5.93249	0.0019412	Up
AT4G23680	AT4G23680	AT4G23680	5.88559	8.17e-07	Up
AT1G77520	AT1G77520	AT1G77520	5.83851	0.000547345	Up
AT3G29590	AT5MAT	AT3G29590	5.82967	0.0146034	Up
AT3G62090	PIL2	AT3G62090	5.82743	0.0049933	Up
AT5G59220	HAI1	AT5G59220	5.81715	1.07e-07	Up
AT2G37870	AT2G37870	AT2G37870	5.79613	2.68e-10	Up
AT5G15960	KIN1	AT5G15960	5.74725	3.05e-07	Up
AT4G28040	UMAMIT33	AT4G28040	5.72535	0.0258749	Up
AT3G22560	AT3G22560	AT3G22560	5.69639	2.14e-05	Up
AT1G32560	AtLEA4-1	AT1G32560	5.67243	0.0123589	Up
AT2G19900	NADP-ME1	AT2G19900	5.66572	0.0210835	Up
AT5G54060	UF3GT	AT5G54060	5.55233	0.0111531	Up
AT3G03170	AT3G03170	AT3G03170	5.52312	2.75e-08	Up
AT2G41190	AT2G41190	AT2G41190	5.45345	7.88e-10	Up
AT3G13672	AT3G13672	AT3G13672	5.4294	9.43e-06	Up
AT1G30220	INT2	AT1G30220	5.40676	1.89e-06	Up
AT1G31750	AT1G31750	AT1G31750	5.3181	1.17e-06	Up
AT2G23110	AT2G23110	AT2G23110	5.29298	0.0143824	Up
AT5G62800	AT5G62800	AT5G62800	5.28795	0.0200268	Up
AT4G27654	AT4G27654	AT4G27654	5.28661	8.1e-06	Up
AT2G21820	AT2G21820	AT2G21820	5.27765	2.3e-08	Up
AT1G73010	PS2 AT1G73010	AT1G73010	5.2367	1.76e-05	Up
AT3G16430	JAL31	AT3G16430	5.23489	0.0353107	Up
AT1G52040	MBP1	AT1G52040	5.22494	4.28e-05	Up
AT1G57590	AT1G57590	AT1G57590	5.12044	1.8e-05	Up
AT1G19210	AT1G19210	AT1G19210	5.10905	0.0118851	Up
AT5G59310	LTP4	AT5G59310	5.07843	0.000753936	Up
AT1G54575	AT1G54575	AT1G54575	5.07725	1.43e-05	Up
AT3G16420	PBP1 AT3G16420	AT3G16420	5.06759	2.02e-06	Up
AT1G67265	RTFL21	AT1G67265	5.0655	0.000247318	Up
AT3G57680	AT3G57680	AT3G57680	5.01866	1.37e-10	Up
AT5G09495	AT5G09495	AT5G09495	5.01641	0.00405475	Up
AT1G04907	U1.10	AT1G04907	5.008	0.00205044	Up
AT1G08630	THA1	AT1G08630	5.00701	1.92e-05	Up
AT5G10140	FLC	AT5G10140	5.00659	0.0381049	Up
AT2G37530	AT2G37530	AT2G37530	4.98891	0.000541688	Up
AT3G22565	AT3G22565	AT3G22565	4.98193	0.0318341	Up
AT3G28740	CYP81D11	AT3G28740	4.95029	0.00663393	Up
AT4G14819	AT4G14819	AT4G14819	4.94093	4.05e-06	Up
AT5G57810	TET15	AT5G57810	4.94006	0.00525714	Up
AT5G42610	AT5G42610	AT5G42610	4.90745	0.00381229	Up
AT1G10070	BCAT-2	AT1G10070	4.88341	0.00467874	Up
AT5G49525	AT5G49525	AT5G49525	4.8793	2.26e-07	Up
AT5G14545	ath-MIR398b	AT5G14545	4.86846	0.00841559	Up
AT5G06760	LEA4-5	AT5G06760	4.86316	2.92e-05	Up
AT3G53980	AT3G53980	AT3G53980	4.82396	7.07e-05	Up
AT5G01300	AT5G01300	AT5G01300	4.82164	2.91e-05	Up
AT3G14280	AT3G14280	AT3G14280	4.79984	1.53e-05	Up
AT3G50940	AT3G50940	AT3G50940	4.74877	0.000368032	Up
AT3G23635	RTFL13	AT3G23635	4.74853	0.0101417	Up
AT5G24380	YSL2	AT5G24380	4.73937	2.08e-05	Up
ATCG01180	ATCG01180	ATCG01180	4.71608	4.73e-12	Up
ATCG00950	ATCG00950	ATCG00950	4.71589	4.73e-12	Up
AT3G10750	AT3G10750	AT3G10750	4.70642	0.00808423	Up
AT4G18422	AT4G18422	AT4G18422	4.62829	0.000165614	Up
AT4G09135	U6.6	AT4G09135	4.61583	0.0129009	Up
AT3G13680	AT3G13680	AT3G13680	4.60951	0.0213593	Up
ATCG00060	ATCG00060	ATCG00060	4.60868	0.0151139	Up
AT4G18360	GOX3	AT4G18360	4.55938	0.0428807	Up
AT2G40080	ELF4	AT2G40080	4.53752	0.00111546	Up
AT1G79900	BAC2	AT1G79900	4.53077	4.59e-05	Up
AT4G23450	AIRP1	AT4G23450	4.52765	4.77e-05	Up
AT3G16360	AHP4	AT3G16360	4.52135	0.000834073	Up
AT4G34410	RRTF1	AT4G34410	4.5059	0.00164554	Up
AT5G17460	AT5G17460	AT5G17460	4.50457	2.77e-07	Up
AT5G16980	AT5G16980	AT5G16980	4.45542	0.0006766	Up
AT4G39795	AT4G39795	AT4G39795	4.45349	0.00024972	Up
AT5G14565	ath-MIR398c	AT5G14565	4.44655	0.0372647	Up
AT1G11210	AT1G11210	AT1G11210	4.42337	0.000121142	Up
ATCG00630	psaJ	ATCG00630	4.41126	1.45e-13	Up
AT2G46680	HB-7 AT2G46680	AT2G46680	4.40186	9.78e-09	Up
AT1G07887	AT1G07887	AT1G07887	4.38073	0.00871484	Up
AT2G07659	AT2G07659	AT2G07659	4.37272	0.00892433	Up
AT1G05347	AT1G05347	AT1G05347	4.36336	8.2e-09	Up
AT4G36791	AT4G36791	AT4G36791	4.36002	0.0219007	Up
AT4G33280	AT4G33280	AT4G33280	4.35848	0.0375252	Up
AT5G52390	AT5G52390	AT5G52390	4.35233	0.0194499	Up
AT2G07758	AT2G07758	AT2G07758	4.34557	0.0146034	Up
ATMG00250	ATMG00250	ATMG00250	4.34557	0.0146034	Up
AT4G18980	AtS40-3	AT4G18980	4.33644	0.00191486	Up
AT3G27510	AT3G27510	AT3G27510	4.33494	0.015518	Up
AT5G40800	AT5G40800	AT5G40800	4.32698	4.48e-06	Up
AT3G48020	AT3G48020	AT3G48020	4.3176	4.29e-05	Up
AT1G18710	MYB47	AT1G18710	4.29303	5.57e-06	Up
AT3G27250	AT3G27250	AT3G27250	4.29044	1.75e-06	Up
AT1G69480	AT1G69480	AT1G69480	4.23205	0.000334525	Up
AT3G20340	AT3G20340	AT3G20340	4.21542	0.00695558	Up
AT1G04263	U5.6	AT1G04263	4.21344	0.000587953	Up
AT1G61820	BGLU46	AT1G61820	4.21325	0.0217476	Up
AT5G08490	SLG1	AT5G08490	4.20287	0.0238644	Up
AT5G07745	AT5G07745	AT5G07745	4.18964	0.0217645	Up
AT1G70300	KUP6	AT1G70300	4.181	2.68e-10	Up
AT1G07985	AT1G07985	AT1G07985	4.14777	0.00401029	Up
AT5G15190	AT5G15190	AT5G15190	4.14739	1.21e-06	Up
AT5G66400	RAB18 AT5G66400	AT5G66400	4.14204	1.85e-05	Up
AT1G08113	AT1G08113	AT1G08113	4.1215	0.00799926	Up
AT1G67920	AT1G67920	AT1G67920	4.07169	0.00120342	Up
AT2G22905	AT2G22905	AT2G22905	4.06499	0.0483635	Up
AT1G69260	AFP1	AT1G69260	4.0578	7.73e-06	Up
AT1G56650	PAP1 AT1G56650	AT1G56650	4.05494	8.93e-07	Up
AT5G06825	AT5G06825	AT5G06825	4.0462	0.000287044	Up
AT3G15534	AT3G15534	AT3G15534	4.02951	0.00294711	Up
AT2G39110	AT2G39110	AT2G39110	4.02688	0.0229455	Up
AT1G72140	AT1G72140	AT1G72140	4.02678	0.0455578	Up
AT5G04370	NAMT1	AT5G04370	4.01242	0.0332721	Up
AT4G13820	AT4G13820	AT4G13820	3.97146	0.0351103	Up
AT3G04065	AT3G04065	AT3G04065	3.96522	0.0174196	Up
AT3G15950	NAI2	AT3G15950	3.95214	0.00105252	Up
AT1G35310	MLP168	AT1G35310	3.93353	0.0330015	Up
AT4G08755	U6.5	AT4G08755	3.91072	2.83e-10	Up
AT1G24580	AT1G24580	AT1G24580	3.87114	0.000163111	Up
AT4G29770	AT4G29770	AT4G29770	3.87107	0.0258996	Up
AT3G49668	AT3G49668	AT3G49668	3.85706	0.0481452	Up
AT4G24000	CSLG2	AT4G24000	3.85537	0.00633474	Up
AT1G22570	AT1G22570	AT1G22570	3.84407	0.00142228	Up
AT1G15772	AT1G15772	AT1G15772	3.82682	0.0368947	Up
AT1G64360	AT1G64360	AT1G64360	3.80932	0.0013648	Up
AT1G05420	OFP12	AT1G05420	3.79905	0.00210862	Up
AT2G38465	AT2G38465	AT2G38465	3.77796	0.00257877	Up
AT1G74930	ORA47	AT1G74930	3.77243	0.00615942	Up
AT4G37140	MEE69	AT4G37140	3.76355	0.0018695	Up
AT4G34860	A/N-InvB	AT4G34860	3.74382	3.66e-10	Up
AT1G56300	AT1G56300	AT1G56300	3.72895	5.33e-05	Up
AT1G70640	AT1G70640	AT1G70640	3.71043	0.00926056	Up
AT5G24770	VSP2	AT5G24770	3.69795	7.33e-05	Up
AT4G33905	AT4G33905	AT4G33905	3.69791	0.000373616	Up
AT5G03204	AT5G03204	AT5G03204	3.69477	0.0227159	Up
AT5G66052	AT5G66052	AT5G66052	3.66988	4.3e-05	Up
AT4G13860	AT4G13860	AT4G13860	3.66518	0.00337535	Up
AT3G09910	RABC2b	AT3G09910	3.65453	3.87e-05	Up
AT1G02340	HFR1	AT1G02340	3.64167	0.000465562	Up
AT4G33550	AT4G33550	AT4G33550	3.63246	0.000685763	Up
AT4G02360	AT4G02360	AT4G02360	3.62279	2.46e-05	Up
AT1G17020	SRG1	AT1G17020	3.5964	0.00343461	Up
AT1G56600	GolS2	AT1G56600	3.58826	0.0153199	Up
AT5G44350	AT5G44350	AT5G44350	3.58666	0.000483194	Up
AT4G33040	AT4G33040	AT4G33040	3.58562	1.85e-05	Up
AT1G62515	AT1G62515	AT1G62515	3.58297	0.000116508	Up
AT5G18130	AT5G18130	AT5G18130	3.57982	0.000355327	Up
AT5G40382	AT5G40382	AT5G40382	3.57892	0.00231711	Up
AT1G09480	AT1G09480	AT1G09480	3.55641	0.00247387	Up
AT2G30300	AT2G30300	AT2G30300	3.55258	0.000129617	Up
AT3G20760	AT3G20760	AT3G20760	3.54878	0.000331439	Up
AT1G48750	AT1G48750	AT1G48750	3.5464	1.79e-07	Up
AT1G09500	AT1G09500	AT1G09500	3.50398	0.00287278	Up
AT1G53080	AT1G53080	AT1G53080	3.50344	0.00971939	Up
AT1G46554	AT1G46554	AT1G46554	3.50052	2.41e-09	Up
AT3G47030	AT3G47030	AT3G47030	3.49781	0.00633107	Up
AT2G06995	AT2G06995	AT2G06995	3.48991	0.000118829	Up
AT3G11690	AT3G11690	AT3G11690	3.48387	6.56e-07	Up
AT2G46270	GBF3	AT2G46270	3.47725	5.48e-07	Up
AT4G06795	AT4G06795	AT4G06795	3.47199	9.91e-06	Up
AT5G59510	RTFL5	AT5G59510	3.47075	0.000908179	Up
ATCG00690	psbT	ATCG00690	3.46542	6.18e-06	Up
AT5G01165	AT5G01165	AT5G01165	3.45721	0.000178796	Up
AT4G33150	AT4G33150	AT4G33150	3.45412	0.00183509	Up
AT3G30305	AT3G30305	AT3G30305	3.44827	3.1e-06	Up
AT1G54160	NF-YA5	AT1G54160	3.4479	7.7e-06	Up
AT2G35343	AT2G35343	AT2G35343	3.44558	1.09e-06	Up
AT1G20015	AT1G20015	AT1G20015	3.42884	0.0114284	Up
AT3G29575	AFP3	AT3G29575	3.38613	2.64e-09	Up
AT4G14090	AT4G14090	AT4G14090	3.37531	0.0209054	Up
AT3G17180	scpl33	AT3G17180	3.36938	0.0227441	Up
AT1G33102	AT1G33102	AT1G33102	3.35728	3.74e-07	Up
AT3G16460	JAL34	AT3G16460	3.35343	1.86e-05	Up
AT5G65030	AT5G65030	AT5G65030	3.3421	0.00766236	Up
AT3G28270	AT3G28270	AT3G28270	3.33515	0.000334262	Up
AT5G12030	HSP17.6A	AT5G12030	3.32687	0.0213593	Up
AT1G62710	BETA-VPE	AT1G62710	3.31098	2.54e-07	Up
AT1G15310	ATHSRP54A	AT1G15310	3.30747	8.19e-05	Up
AT3G20100	CYP705A19	AT3G20100	3.29929	3.3e-05	Up
AT1G76955	AT1G76955	AT1G76955	3.2834	0.00146462	Up
AT3G03470	CYP89A9	AT3G03470	3.28211	9.59e-06	Up
AT1G16515	AT1G16515	AT1G16515	3.28134	2.63e-06	Up
AT3G03341	AT3G03341	AT3G03341	3.27666	0.000300362	Up
AT1G62510	AT1G62510	AT1G62510	3.27542	0.00111367	Up
AT3G62550	AT3G62550	AT3G62550	3.27412	0.000608343	Up
AT1G60190	PUB19	AT1G60190	3.27007	0.00151005	Up
AT2G45210	SAUR36	AT2G45210	3.26548	0.00467261	Up
AT1G65500	AT1G65500	AT1G65500	3.26089	0.00100483	Up
AT1G34060	AT1G34060	AT1G34060	3.25832	0.00397313	Up
AT2G05518	AT2G05518	AT2G05518	3.25645	0.000963539	Up
AT1G17870	EGY3	AT1G17870	3.25571	2.2e-05	Up
AT2G29090	CYP707A2	AT2G29090	3.25241	4.3e-06	Up
AT5G53048	AT5G53048	AT5G53048	3.23696	0.0183062	Up
AT4G37225	AT4G37225	AT4G37225	3.2253	0.000553294	Up
AT1G08117	AT1G08117	AT1G08117	3.2171	0.0174008	Up
AT1G19630	CYP722A1	AT1G19630	3.2141	9.22e-06	Up
AT5G25390	SHN3	AT5G25390	3.21188	0.0302655	Up
AT5G53710	AT5G53710	AT5G53710	3.19476	0.00338371	Up
AT5G09930	ABCF2	AT5G09930	3.19344	0.00654732	Up
AT5G63130	AT5G63130	AT5G63130	3.17546	0.00129922	Up
AT1G52000	AT1G52000	AT1G52000	3.17443	0.000137342	Up
AT3G27210	AT3G27210	AT3G27210	3.1637	0.000257393	Up
AT5G10090	TPR13	AT5G10090	3.16308	0.0402911	Up
AT5G03545	AT5G03545	AT5G03545	3.16041	0.0226915	Up
AT2G04405	AT2G04405	AT2G04405	3.15979	0.000869509	Up
AT3G24463	AT3G24463	AT3G24463	3.15315	0.000758823	Up
AT5G02550	AT5G02550	AT5G02550	3.15087	0.00594451	Up
AT1G71910	AT1G71910	AT1G71910	3.14969	0.00278078	Up
AT4G14270	AT4G14270	AT4G14270	3.14854	8.2e-09	Up
AT2G33775	RALFL19	AT2G33775	3.14786	0.00570324	Up
AT3G46230	HSP17.4	AT3G46230	3.14557	0.0305599	Up
AT1G54100	ALDH7B4	AT1G54100	3.14044	1.66e-09	Up
AT2G17660	AT2G17660	AT2G17660	3.13961	0.0198982	Up
AT1G67365	AT1G67365	AT1G67365	3.12868	3.15e-06	Up
AT4G15910	DI21	AT4G15910	3.10226	0.0019599	Up
AT2G42760	AT2G42760	AT2G42760	3.09736	8.8e-05	Up
AT5G45310	AT5G45310	AT5G45310	3.08704	6.18e-06	Up
AT3G01695	U1.7	AT3G01695	3.08673	1.9e-07	Up
AT3G09855	AT3G09855	AT3G09855	3.077	0.012734	Up
AT1G73040	AT1G73040	AT1G73040	3.07395	0.000309797	Up
AT5G22860	AT5G22860	AT5G22860	3.06375	3.53e-09	Up
AT5G06510	NF-YA10	AT5G06510	3.05735	8.49e-07	Up
AT1G80820	CCR2 AT1G80820	AT1G80820	3.05177	0.0110403	Up
AT3G57540	AT3G57540	AT3G57540	3.04862	5.95e-06	Up
AT3G61990	OMTF3	AT3G61990	3.04754	0.000222199	Up
AT1G22370	UGT85A5	AT1G22370	3.02798	6.55e-06	Up
AT1G80570	AT1G80570	AT1G80570	3.0276	0.0124031	Up
AT2G14070	AT2G14070	AT2G14070	3.02697	0.0246222	Up
AT5G47060	AT5G47060	AT5G47060	3.02579	1.36e-10	Up
AT5G48412	AT5G48412	AT5G48412	3.02122	4.01e-10	Up
AT1G06537	AT1G06537	AT1G06537	3.01882	8.56e-09	Up
AT4G12080	AHL1	AT4G12080	3.01487	3.3e-05	Up
AT2G45930	AT2G45930	AT2G45930	3.01289	0.0347035	Up
AT4G37400	CYP81F3	AT4G37400	3.00986	0.000242586	Up
AT4G25480	DREB1A	AT4G25480	3.00519	9.96e-05	Up
AT3G01715	U1.6	AT3G01715	3.00039	2.95e-07	Up
AT1G62620	AT1G62620	AT1G62620	2.99733	4.53e-06	Up
AT3G14360	AT3G14360	AT3G14360	2.99503	0.000912245	Up
AT3G17790	PAP17	AT3G17790	2.9941	0.000368032	Up
AT5G62150	AT5G62150	AT5G62150	2.98999	0.0124617	Up
AT5G61455	U2.7 AT5G61455	AT5G61455	2.98323	0.000257251	Up
ATCG00870	ycf15-A ATCG00870	ATCG00870	2.9737	0.00110501	Up
ATCG01270	ycf15-A ATCG01270	ATCG01270	2.97369	0.00110419	Up
AT5G19875	AT5G19875	AT5G19875	2.97183	0.000107503	Up
AT5G39520	AT5G39520	AT5G39520	2.96623	0.0477116	Up
AT1G30190	AT1G30190	AT1G30190	2.96581	0.00214409	Up
AT1G08115	U1.5	AT1G08115	2.96478	0.000100171	Up
AT4G25980	AT4G25980	AT4G25980	2.96456	0.00505637	Up
AT1G29600	AT1G29600	AT1G29600	2.95479	0.00556482	Up
AT5G49015	AT5G49015	AT5G49015	2.95147	3.26e-05	Up
ATMG00090	rps3 ATMG00090	ATMG00090	2.94886	5.51e-13	Up
AT5G45630	AT5G45630	AT5G45630	2.94555	0.0241982	Up
AT1G07500	AT1G07500	AT1G07500	2.94364	0.00791732	Up
AT5G63350	AT5G63350	AT5G63350	2.93178	0.00219065	Up
AT3G23870	AT3G23870	AT3G23870	2.93131	0.00366908	Up
AT3G61900	AT3G61900	AT3G61900	2.93069	0.0041006	Up
AT4G15248	BBX30	AT4G15248	2.92943	1.86e-06	Up
AT1G53470	MSL4	AT1G53470	2.92003	0.0126002	Up
AT1G02770	AT1G02770	AT1G02770	2.90849	0.0398919	Up
AT1G10095	AT1G10095	AT1G10095	2.90548	0.0147337	Up
AT5G67620	AT5G67620	AT5G67620	2.90212	0.00770045	Up
AT1G21400	AT1G21400	AT1G21400	2.8975	2.53e-06	Up
AT1G53890	AT1G53870 AT1G53890	AT1G53890	2.88731	0.00377535	Up
AT1G53870	AT1G53870 AT1G53870	AT1G53870	2.88731	0.00375286	Up
AT2G15960	AT2G15960	AT2G15960	2.88556	7.16e-05	Up
AT3G48350	CEP3	AT3G48350	2.88161	1.31e-05	Up
AT3G61890	HB-12	AT3G61890	2.87842	0.000134309	Up
AT4G32920	AT4G32920	AT4G32920	2.87675	7.27e-08	Up
AT3G14440	NCED3	AT3G14440	2.87454	0.00718382	Up
AT5G10930	CIPK5	AT5G10930	2.87454	2.15e-05	Up
AT3G10910	AT3G10910	AT3G10910	2.87345	6.16e-06	Up
AT2G19810	OZF1	AT2G19810	2.87121	4.27e-07	Up
AT1G52410	TSA1 AT1G52410	AT1G52410	2.86625	4.03e-05	Up
AT1G13360	AT1G13360	AT1G13360	2.85987	1.17e-07	Up
AT5G53870	ENODL1	AT5G53870	2.85793	8.74e-05	Up
AT5G44980	AT5G44980	AT5G44980	2.85682	1.28e-05	Up
AT1G05273	U2.1	AT1G05273	2.84731	2.77e-07	Up
AT4G21910	AT4G21910	AT4G21910	2.84365	6.34e-08	Up
AT5G06845	AT5G06845	AT5G06845	2.84174	9.48e-06	Up
AT3G14590	NTMC2T6.2	AT3G14590	2.83977	0.00146393	Up
AT1G13448	AT1G13448	AT1G13448	2.83573	6e-05	Up
AT1G52400	BGLU18	AT1G52400	2.83475	0.00278717	Up
AT1G08230	AT1G08230	AT1G08230	2.8287	1.29e-08	Up
AT1G73700	AT1G73700	AT1G73700	2.82045	0.0166216	Up
AT1G24575	AT1G24575	AT1G24575	2.8083	0.000295637	Up
AT4G27652	AT4G27652	AT4G27652	2.8079	0.000912159	Up
AT5G15022	AT5G15022	AT5G15022	2.79618	0.0222687	Up
AT3G16400	NSP1	AT3G16400	2.7913	1.64e-08	Up
AT2G10606	ath-MIR396a	AT2G10606	2.79101	0.0372109	Up
AT1G22160	AT1G22160	AT1G22160	2.79062	9.24e-05	Up
AT5G50800	SWEET13	AT5G50800	2.78954	0.00568778	Up
AT1G77450	NAC032	AT1G77450	2.78918	0.000795074	Up
ATMG00590	ATMG00590	ATMG00590	2.78008	2.44e-05	Up
ATMG01020	ATMG01020	ATMG01020	2.77923	0.0278444	Up
AT5G52310	LTI78	AT5G52310	2.76771	0.00612731	Up
AT2G02060	AT2G02060	AT2G02060	2.76633	6.19e-06	Up
AT5G01520	AIRP2	AT5G01520	2.76401	0.000285845	Up
AT4G20820	AT4G20820	AT4G20820	2.75629	0.0178644	Up
AT1G05417	AT1G05417	AT1G05417	2.75331	0.00226671	Up
AT1G27030	AT1G27030	AT1G27030	2.75195	0.000149414	Up
AT4G01060	CPL3 AT4G01060	AT4G01060	2.74354	2.19e-05	Up
AT2G35382	AT2G35382	AT2G35382	2.74294	0.0142198	Up
AT2G35585	AT2G35585	AT2G35585	2.7421	0.0127412	Up
AT1G80110	PP2-B11	AT1G80110	2.7345	4.13e-05	Up
AT5G03230	AT5G03230	AT5G03230	2.73403	9.59e-05	Up
AT3G57765	U2.3 AT3G57765	AT3G57765	2.7299	2.48e-06	Up
AT2G07671	AT2G07671	AT2G07671	2.72122	8.49e-07	Up
ATMG00060	ATMG00060	ATMG00060	2.72107	0.00966219	Up
AT1G62975	AT1G62975	AT1G62975	2.72049	0.00521207	Up
AT5G15970	KIN2	AT5G15970	2.71968	9.46e-05	Up
AT1G56165	AT1G56165	AT1G56165	2.71194	0.00148688	Up
AT2G47670	AT2G47670	AT2G47670	2.71165	4.77e-06	Up
AT5G59732	AT5G59732	AT5G59732	2.71132	2.28e-07	Up
AT3G56825	U2.4 AT3G56825	AT3G56825	2.69795	1.46e-07	Up
AT1G24822	AT1G24822	AT1G24822	2.69579	0.0174008	Up
AT2G35384	AT2G35384	AT2G35384	2.69548	0.0172406	Up
AT3G49570	LSU3	AT3G49570	2.69174	0.0348268	Up
AT3G05937	AT3G05937	AT3G05937	2.68985	9.25e-05	Up
AT3G24500	MBF1C	AT3G24500	2.68976	3.22e-05	Up
AT3G19270	CYP707A4	AT3G19270	2.68743	0.00801028	Up
AT5G07322	AT5G07322	AT5G07322	2.68393	0.00690917	Up
AT1G07128	AT1G07128	AT1G07128	2.67857	0.00421615	Up
AT2G34490	CYP710A2	AT2G34490	2.6717	0.000600912	Up
AT2G35387	AT2G35387	AT2G35387	2.67019	0.00223272	Up
AT2G31585	AT2G31585	AT2G31585	2.66312	4.27e-05	Up
AT3G12580	HSP70	AT3G12580	2.65892	1.44e-05	Up
AT1G73687	ath-MIR159a	AT1G73687	2.65779	0.0408853	Up
AT1G67105	AT1G67105	AT1G67105	2.65563	0.0196943	Up
AT1G25097	AT1G25097	AT1G25097	2.65459	0.00780668	Up
AT1G09913	AT1G09913	AT1G09913	2.64539	0.00583254	Up
AT1G53480	MRD1	AT1G53480	2.64237	0.0106516	Up
ATMG00570	ATMG00570	ATMG00570	2.6348	1.9e-05	Up
AT5G47550	AT5G47550	AT5G47550	2.63317	5.95e-06	Up
AT2G07599	AT2G07599	AT2G07599	2.63316	0.000118509	Up
AT1G62540	FMO GS-OX2	AT1G62540	2.62439	4.76e-05	Up
AT3G57520	SIP2	AT3G57520	2.62227	0.00203493	Up
AT3G05400	AT3G05400	AT3G05400	2.61309	0.0445086	Up
AT2G46410	CPC	AT2G46410	2.61307	0.000547024	Up
AT2G42540	COR15A	AT2G42540	2.6082	0.000709958	Up
AT5G54165	AT5G54165	AT5G54165	2.60704	0.0287486	Up
AT1G77960	AT1G77960	AT1G77960	2.60575	0.00178542	Up
AT4G24450	PWD AT4G24450	AT4G24450	2.60103	2.21e-05	Up
AT1G28330	DYL1	AT1G28330	2.60091	0.00311452	Up
ATCG00310	ATCG00310	ATCG00310	2.60031	2.71e-07	Up
AT2G28840	XBAT31	AT2G28840	2.59532	2.07e-05	Up
AT4G15990	AT4G15990	AT4G15990	2.58874	0.044549	Up
AT3G50970	LTI30	AT3G50970	2.58767	0.0204189	Up
AT3G09390	MT2A	AT3G09390	2.58733	5.12e-05	Up
AT3G62960	AT3G62960	AT3G62960	2.58425	0.0095357	Up
AT2G21590	APL4	AT2G21590	2.58422	0.0026354	Up
AT2G41380	AT2G41380	AT2G41380	2.57448	0.0024624	Up
AT1G70185	AT1G70185	AT1G70185	2.57275	0.0091754	Up
AT1G64660	MGL	AT1G64660	2.57269	7.22e-08	Up
AT3G48240	AT3G48240	AT3G48240	2.55913	0.00360919	Up
AT5G27660	DEG14	AT5G27660	2.5571	6.99e-05	Up
AT1G06980	AT1G06980	AT1G06980	2.55628	0.0190225	Up
AT3G26290	CYP71B26	AT3G26290	2.55344	2.19e-05	Up
AT3G48390	AT3G48390	AT3G48390	2.54356	0.0054167	Up
AT5G64870	AT5G64870	AT5G64870	2.54276	0.0117	Up
AT1G22065	AT1G22065	AT1G22065	2.53949	0.0047726	Up
AT1G08890	AT1G08890	AT1G08890	2.53846	2.99e-05	Up
AT5G00765	AT5G00765	AT5G00765	2.53538	0.0338015	Up
AT4G30460	AT4G30460	AT4G30460	2.53514	2.35e-05	Up
AT2G04100	AT2G04100	AT2G04100	2.53187	0.0330015	Up
AT1G55850	CSLE1	AT1G55850	2.53006	2.93e-05	Up
ATMG01080	atp9	ATMG01080	2.52624	5.95e-06	Up
AT4G11910	AT4G11910	AT4G11910	2.52502	0.0337935	Up
AT3G10200	AT3G10200	AT3G10200	2.52061	0.00563266	Up
AT3G01470	HB-1 AT3G01470	AT3G01470	2.51901	1.22e-07	Up
AT3G56360	AT3G56360	AT3G56360	2.51722	0.00205738	Up
AT1G06180	MYB13	AT1G06180	2.51265	0.000686548	Up
AT1G17460	TRFL3	AT1G17460	2.5096	0.000630467	Up
AT1G78670	GGH3	AT1G78670	2.50869	0.00494588	Up
AT2G37750	AT2G37750	AT2G37750	2.50443	0.0447333	Up
AT3G12500	HCHIB	AT3G12500	2.49993	0.00315479	Up
AT3G60690	AT3G60690	AT3G60690	2.49954	0.000104144	Up
AT4G23493	AT4G23493	AT4G23493	2.49867	0.00418414	Up
AT1G76705	AT1G76705	AT1G76705	2.49402	0.0252244	Up
AT3G19960	ATM1	AT3G19960	2.48881	3.33e-06	Up
AT1G47960	C/VIF1	AT1G47960	2.48688	1.64e-05	Up
AT1G29535	AT1G29535	AT1G29535	2.48388	0.00111581	Up
AT5G24155	AT5G24155	AT5G24155	2.4787	7.86e-05	Up
AT5G04105	U1.4	AT5G04105	2.47857	0.0145863	Up
AT1G09950	RAS1	AT1G09950	2.46693	0.0311878	Up
ATCG01070	ndhE	ATCG01070	2.4668	3.64e-07	Up
AT3G63060	EDL3	AT3G63060	2.46501	0.0451843	Up
AT1G23120	AT1G23120	AT1G23120	2.45727	0.0390011	Up
AT4G06705	AT4G06705	AT4G06705	2.45698	0.0009572	Up
AT1G01810	AT1G01810	AT1G01810	2.45259	0.0234305	Up
AT2G38070	AT2G38070	AT2G38070	2.44609	0.00360958	Up
AT1G25277	AT1G25277	AT1G25277	2.44553	4.19e-05	Up
AT4G06255	AT4G06255	AT4G06255	2.44372	0.000160269	Up
AT3G60640	ATG8G	AT3G60640	2.44207	5.9e-10	Up
AT1G10140	AT1G10140	AT1G10140	2.43799	0.0148079	Up
AT4G39320	AT4G39320	AT4G39320	2.43783	0.0188712	Up
AT3G47640	PYE	AT3G47640	2.43758	2.72e-05	Up
AT2G23010	SCPL9	AT2G23010	2.43685	0.00568736	Up
ATMG01060	ATMG01060	ATMG01060	2.42979	0.0451214	Up
AT1G70800	EHB1	AT1G70800	2.42731	0.00139296	Up
AT5G01815	AT5G01815	AT5G01815	2.42084	0.0296006	Up
AT4G26095	AT4G26095	AT4G26095	2.41941	0.0105962	Up
AT1G63370	AT1G63370	AT1G63370	2.41866	0.00342578	Up
AT4G04565	AT4G04565	AT4G04565	2.41701	0.000708186	Up
AT1G29050	TBL38	AT1G29050	2.41273	5.58e-06	Up
AT2G07696	RPS7 AT2G07696	AT2G07696	2.39985	7.86e-05	Up
AT4G06536	AT4G06536	AT4G06536	2.3971	4.45e-05	Up
AT4G34000	ABF3	AT4G34000	2.39025	9.52e-06	Up
AT1G29640	AT1G29640	AT1G29640	2.39014	0.00425811	Up
AT1G76820	AT1G76820	AT1G76820	2.3864	2.95e-05	Up
AT5G23230	NIC2	AT5G23230	2.37956	0.000154294	Up
AT3G14452	AT3G14452	AT3G14452	2.37593	0.0113968	Up
AT3G05165	AT3G05165	AT3G05165	2.37493	0.000218309	Up
AT4G38380	AT4G38380	AT4G38380	2.37335	0.0355915	Up
AT1G20450	ERD10	AT1G20450	2.36823	8.34e-05	Up
AT5G50720	HVA22E	AT5G50720	2.36678	0.000156185	Up
AT3G04420	NAC048	AT3G04420	2.36006	0.0402797	Up
AT2G43060	IBH1	AT2G43060	2.35298	3.4e-05	Up
ATCG00420	ndhJ	ATCG00420	2.34663	6.31e-05	Up
AT2G04435	AT2G04435	AT2G04435	2.34429	0.00489899	Up
AT2G04455	U2.10b/12	AT2G04455	2.34393	0.00657822	Up
AT4G12382	AT4G12382	AT4G12382	2.3436	0.0324028	Up
AT1G18870	ICS2	AT1G18870	2.3435	0.00245581	Up
AT3G26280	CYP71B4	AT3G26280	2.34198	0.0138842	Up
AT4G38060	AT4G38060	AT4G38060	2.33907	0.000227636	Up
AT1G02390	GPAT2	AT1G02390	2.33816	0.00249	Up
AT1G33970	AT1G33970	AT1G33970	2.33669	3.73e-06	Up
AT1G67856	AT1G67856	AT1G67856	2.33604	0.0187681	Up
AT5G66110	HIPP27	AT5G66110	2.3274	0.0102271	Up
AT5G23750	AT5G23750	AT5G23750	2.32496	2.8e-07	Up
AT1G01380	ETC1	AT1G01380	2.31863	0.00113209	Up
AT2G26355	AT2G26355	AT2G26355	2.31585	2.53e-05	Up
ATCG00390	ATCG00390	ATCG00390	2.31465	0.0176033	Up
AT4G34230	CAD5	AT4G34230	2.31152	0.000150268	Up
AT4G19390	AT4G19390	AT4G19390	2.30619	0.00116492	Up
ATMG00510	nad7	ATMG00510	2.30607	0.00151038	Up
ATCG00270	psbD	ATCG00270	2.30561	7.58e-05	Up
AT2G07718	AT2G07718	AT2G07718	2.30461	6.6e-10	Up
ATCG01120	rps15	ATCG01120	2.30425	3.75e-07	Up
AT1G60960	IRT3	AT1G60960	2.30291	0.00118468	Up
AT5G10410	AT5G10410	AT5G10410	2.29643	0.000389106	Up
AT2G28400	AT2G28400	AT2G28400	2.29603	0.00980155	Up
AT3G15750	AT3G15750	AT3G15750	2.29322	0.000212605	Up
AT1G51090	AT1G51090	AT1G51090	2.29297	0.0125327	Up
AT3G11415	AT3G11415	AT3G11415	2.2916	0.0234901	Up
ATCG00760	rpl36	ATCG00760	2.28665	0.000334262	Up
AT5G18540	AT5G18540	AT5G18540	2.28368	0.00850154	Up
AT3G26740	CCL	AT3G26740	2.28123	0.00327303	Up
AT1G18745	AT1G18745	AT1G18745	2.27918	3.53e-09	Up
AT2G07675	AT2G07675 AT2G07675	AT2G07675	2.27548	0.00921114	Up
AT2G29420	GSTU7	AT2G29420	2.2736	1.32e-08	Up
AT1G17940	AT1G17940	AT1G17940	2.27316	1.82e-05	Up
AT1G23040	AT1G23040	AT1G23040	2.27309	0.000786003	Up
AT3G02610	AT3G02610	AT3G02610	2.27144	0.0362549	Up
AT1G67360	AT1G67360	AT1G67360	2.27055	0.000252528	Up
AT1G32690	AT1G32690	AT1G32690	2.27047	3.27e-05	Up
AT3G10300	AT3G10300	AT3G10300	2.26916	2.06e-05	Up
AT1G70920	HB18	AT1G70920	2.26905	0.0482294	Up
AT5G02420	AT5G02420	AT5G02420	2.26897	0.0059118	Up
AT4G34990	MYB32	AT4G34990	2.26732	2.4e-08	Up
ATMG00650	nad4L	ATMG00650	2.2647	0.00150645	Up
AT1G18265	AT1G18265	AT1G18265	2.26468	0.0104061	Up
AT1G49450	AT1G49450	AT1G49450	2.26441	0.0368351	Up
AT4G36010	AT4G36010	AT4G36010	2.26144	0.0150558	Up
AT4G36900	RAP2.10	AT4G36900	2.25618	0.000205444	Up
AT1G06553	AT1G06553	AT1G06553	2.25523	0.000541688	Up
AT4G21930	AT4G21930	AT4G21930	2.25184	0.00166231	Up
ATMG00980	AT2G07675 ATMG00980	ATMG00980	2.25144	0.0101743	Up
AT3G11410	PP2CA	AT3G11410	2.25004	9.53e-05	Up
AT4G17670	AT4G17670	AT4G17670	2.24483	0.00153087	Up
AT2G05215	AT2G05215	AT2G05215	2.24407	0.00800159	Up
AT2G25964	AT2G25964	AT2G25964	2.24049	3.96e-06	Up
AT1G15100	RHA2A	AT1G15100	2.23992	2.29e-06	Up
AT3G08230	AT3G08230	AT3G08230	2.23965	0.0419957	Up
AT3G48410	AT3G48410	AT3G48410	2.23564	0.00137419	Up
AT5G19740	AT5G19740	AT5G19740	2.23347	0.000174398	Up
AT3G26170	CYP71B19	AT3G26170	2.2308	0.0101224	Up
AT4G30960	SIP3	AT4G30960	2.23043	2.37e-07	Up
AT4G27657	AT4G27657	AT4G27657	2.22908	0.00013607	Up
AT5G66490	AT5G66490	AT5G66490	2.22643	0.000257251	Up
AT2G16990	AT2G16990	AT2G16990	2.22633	0.000623187	Up
AT5G67245	AT5G67245	AT5G67245	2.22498	7.07e-05	Up
ATMG00660	ATMG00660	ATMG00660	2.22448	4.37e-17	Up
AT1G22985	CRF7	AT1G22985	2.21862	0.00905023	Up
AT2G09700	AT2G09700	AT2G09700	2.21263	8.23e-08	Up
AT1G64370	AT1G64370	AT1G64370	2.21227	0.00254416	Up
AT4G36930	SPT	AT4G36930	2.21174	0.00309924	Up
AT1G61930	AT1G61930	AT1G61930	2.20868	0.000565591	Up
AT1G62810	CuAO1	AT1G62810	2.20519	0.000394252	Up
AT2G04375	U2.10	AT2G04375	2.20296	0.00183509	Up
AT5G08525	AT5G08525	AT5G08525	2.20176	0.0335707	Up
AT2G24870	AT2G24870	AT2G24870	2.2006	0.026724	Up
AT1G08213	AT1G08213	AT1G08213	2.19703	0.00924659	Up
AT4G30660	AT4G30660	AT4G30660	2.19595	9.14e-06	Up
AT4G14580	CIPK4	AT4G14580	2.19537	0.00203931	Up
AT2G07815	AT2G07815	AT2G07815	2.19508	0.000209359	Up
AT5G17490	RGL3	AT5G17490	2.1946	0.0201289	Up
AT1G55760	AT1G55760	AT1G55760	2.19265	0.000296517	Up
AT1G05100	MAPKKK18	AT1G05100	2.19141	0.0358498	Up
AT4G39955	AT4G39955	AT4G39955	2.18577	0.00110655	Up
AT4G13180	AT4G13180	AT4G13180	2.18517	0.00176348	Up
ATCG01060	psaC	ATCG01060	2.18481	0.00186702	Up
AT1G73680	ALPHA DOX2	AT1G73680	2.18174	2.95e-09	Up
AT3G63210	AT3G63210	AT3G63210	2.18058	0.00268162	Up
AT4G05110	ENT6	AT4G05110	2.17442	0.000322218	Up
AT1G74458	AT1G74458	AT1G74458	2.17416	0.00625426	Up
AT2G07751	AT2G07751 AT2G07751	AT2G07751	2.17271	7.39e-07	Up
AT2G03590	UPS1	AT2G03590	2.17106	0.000356051	Up
AT2G07734	AT2G07734	AT2G07734	2.16828	0.00359282	Up
AT3G63450	AT3G63450	AT3G63450	2.16659	0.0105269	Up
AT2G21180	AT2G21180	AT2G21180	2.16204	0.000429268	Up
AT4G22280	AT4G22280	AT4G22280	2.16043	0.0270865	Up
AT1G14490	AT1G14490	AT1G14490	2.15815	0.0428482	Up
AT2G41200	AT2G41200	AT2G41200	2.15789	2.01e-09	Up
AT1G70420	AT1G70420	AT1G70420	2.15737	0.0134099	Up
AT4G30650	AT4G30650	AT4G30650	2.15705	0.0204217	Up
AT2G46690	AT2G46690	AT2G46690	2.1549	0.000228585	Up
AT2G39800	P5CS1	AT2G39800	2.15421	0.003242	Up
AT2G19930	AT2G19930	AT2G19930	2.15269	0.0241431	Up
AT1G49720	ABF1	AT1G49720	2.15241	0.000881518	Up
AT3G48280	CYP71A25	AT3G48280	2.15026	0.00736237	Up
AT3G14560	AT3G14560	AT3G14560	2.1494	5.87e-06	Up
AT2G45830	DTA2	AT2G45830	2.14697	0.00945948	Up
AT3G25717	RTFL16	AT3G25717	2.14241	0.000906346	Up
AT1G27200	AT1G27200	AT1G27200	2.13412	4.64e-07	Up
AT3G20250	PUM5	AT3G20250	2.13304	0.00201034	Up
AT2G06002	AT2G06002	AT2G06002	2.12954	0.0317036	Up
AT4G06305	AT4G06305	AT4G06305	2.12781	0.00473093	Up
AT5G46115	AT5G46115	AT5G46115	2.12674	0.0111034	Up
AT1G11700	AT1G11700	AT1G11700	2.12536	0.00162504	Up
AT1G61890	AT1G61890	AT1G61890	2.12043	0.00258905	Up
AT4G36990	HSF4	AT4G36990	2.11892	0.0132591	Up
ATMG00990	AT2G07751 ATMG00990	ATMG00990	2.11513	2.68e-06	Up
AT4G36648	AT4G36648	AT4G36648	2.11504	0.000145036	Up
AT5G11110	SPS2F	AT5G11110	2.11397	0.00162937	Up
AT2G08725	AT2G08725	AT2G08725	2.11386	0.0392273	Up
AT2G46660	CYP78A6	AT2G46660	2.10919	0.00035975	Up
AT2G41210	PIP5K5	AT2G41210	2.10654	0.000176785	Up
AT5G58650	PSY1	AT5G58650	2.1033	0.000722107	Up
ATMG00080	rpl16 ATMG00080	ATMG00080	2.10326	6.14e-05	Up
AT5G62020	HSFB2A	AT5G62020	2.10256	0.000295637	Up
ATCG00590	petL	ATCG00590	2.10196	0.00158182	Up
AT4G23870	AT4G23870	AT4G23870	2.10098	0.00237868	Up
AT2G28720	AT2G28720	AT2G28720	2.0986	0.000553299	Up
AT3G50840	AT3G50840	AT3G50840	2.09666	0.0271932	Up
AT4G30710	QWRF8	AT4G30710	2.09595	1.15e-05	Up
AT1G63240	AT1G63240	AT1G63240	2.09406	4.07e-05	Up
ATCG01110	ndhH	ATCG01110	2.09293	5.69e-05	Up
AT3G16470	JR1	AT3G16470	2.09146	0.00162533	Up
AT1G62610	AT1G62610	AT1G62610	2.09099	6.45e-06	Up
AT3G21890	BBX31	AT3G21890	2.0892	0.00487564	Up
AT5G44005	AT5G44005	AT5G44005	2.08825	0.000709958	Up
AT4G13800	AT4G13800	AT4G13800	2.0868	0.00420115	Up
AT4G20320	AT4G20320	AT4G20320	2.07805	0.0435383	Up
AT2G34810	AT2G34810	AT2G34810	2.07748	0.000441156	Up
AT2G16720	MYB7	AT2G16720	2.07597	0.000549038	Up
AT5G02230	AT5G02230	AT5G02230	2.07529	0.000970775	Up
AT2G17840	ERD7	AT2G17840	2.07404	0.0197856	Up
AT5G56520	AT5G56520	AT5G56520	2.07197	3.45e-06	Up
AT2G09695	AT2G09695	AT2G09695	2.06813	0.0146034	Up
ATMG00040	ATMG00040	ATMG00040	2.06793	0.000169267	Up
AT3G04040	AT3G04040	AT3G04040	2.06633	5.62e-05	Up
AT5G43403	AT5G43403	AT5G43403	2.06566	1.42e-08	Up
ATMG01280	ATMG01280	ATMG01280	2.06363	0.00144217	Up
AT2G07761	AT2G07761	AT2G07761	2.06307	0.0140847	Up
AT1G01470	LEA14	AT1G01470	2.06143	0.00165974	Up
AT5G65210	TGA1	AT5G65210	2.0604	0.00918896	Up
AT3G56705	U2.6 AT3G56705	AT3G56705	2.05949	0.00710016	Up
AT1G20440	COR47	AT1G20440	2.05888	0.00200233	Up
AT1G67870	AT1G67870	AT1G67870	2.05861	0.00178542	Up
AT3G15300	AT3G15300	AT3G15300	2.05759	0.000285575	Up
AT5G10300	MES5	AT5G10300	2.05754	0.00782981	Up
AT4G22820	AT4G22820	AT4G22820	2.04657	0.000310358	Up
AT3G56240	CCH	AT3G56240	2.04308	0.00315479	Up
AT5G28310	AT5G28310	AT5G28310	2.04102	0.0111291	Up
ATMG00516	ATMG00516	ATMG00516	2.04032	0.00938174	Up
AT1G80310	MOT2	AT1G80310	2.03954	0.000158653	Up
AT1G09530	PIF3	AT1G09530	2.03767	8.4e-06	Up
AT1G79529	AT1G79529	AT1G79529	2.03683	0.00263015	Up
AT3G29140	AT3G29140	AT3G29140	2.03678	0.010282	Up
AT3G54363	AT3G54363	AT3G54363	2.03227	1.97e-05	Up
AT4G11211	AT4G11211	AT4G11211	2.03127	0.0060377	Up
ATCG00140	atpH	ATCG00140	2.03095	0.000525845	Up
AT5G64230	AT5G64230	AT5G64230	2.03078	0.00100775	Up
AT2G27200	AT2G27200	AT2G27200	2.02985	0.00131008	Up
AT4G15258	SNOR37-2	AT4G15258	2.02764	0.0416083	Up
AT4G14020	AT4G14020	AT4G14020	2.02684	0.0200383	Up
AT3G20830	UCNL	AT3G20830	2.02643	1.4e-05	Up
AT2G46192	AT2G46192	AT2G46192	2.025	6.21e-08	Up
AT2G22080	AT2G22080	AT2G22080	2.02383	0.000295465	Up
AT2G07706	AT2G07706	AT2G07706	2.02346	0.00236399	Up
AT3G04175	AT3G04175	AT3G04175	2.022	0.0172952	Up
ATMG01170	atp6-2	ATMG01170	2.01942	1.59e-05	Up
AT5G39850	AT5G39850	AT5G39850	2.01778	0.00124326	Up
ATMG01200	ATMG01200	ATMG01200	2.01703	0.00632247	Up
ATMG01270	RPS7 ATMG01270	ATMG01270	2.01665	0.0038769	Up
AT1G80120	AT1G80120	AT1G80120	2.01655	0.0041396	Up
AT1G08103	AT1G08103	AT1G08103	2.01448	0.0438358	Up
ATMG00340	ATMG00340	ATMG00340	2.01393	0.017572	Up
AT3G59210	AT3G59210	AT3G59210	2.01205	8.75e-07	Up
AT2G20560	AT2G20560	AT2G20560	2.01113	0.00109621	Up
AT2G07681	ABCI4	AT2G07681	2.01103	0.0105339	Up
AT1G10970	ZIP4 AT1G10970	AT1G10970	2.01103	5.29e-05	Up
AT5G09585	U2.5	AT5G09585	2.01031	0.00215159	Up
AT3G22550	AT3G22550	AT3G22550	2.01029	0.0335591	Up
AT4G23880	AT4G23880	AT4G23880	2.00856	0.00284316	Up
AT5G66658	AT5G66658	AT5G66658	2.00793	0.000398056	Up
AT5G01880	AT5G01880	AT5G01880	2.00302	5.24e-07	Up
AT1G58270	ZW9	AT1G58270	2.00181	0.00098553	Up
AT4G23600	CORI3	AT4G23600	2.00014	0.0165524	Up
AT4G35750	AT4G35750	AT4G35750	1.99925	0.00878474	Up
AT1G75166	AT1G75166	AT1G75166	1.99787	0.00148347	Up
AT5G47370	HAT2	AT5G47370	1.99744	6.79e-06	Up
AT1G04227	AT1G04227	AT1G04227	1.99538	0.000526162	Up
AT3G11591	AT3G11591	AT3G11591	1.9884	0.000783793	Up
AT2G07774	AT2G07774	AT2G07774	1.98756	0.00991375	Up
AT5G40240	UMAMIT40	AT5G40240	1.98319	0.0317129	Up
ATCG00670	ATCG00670	ATCG00670	1.98178	2.57e-07	Up
AT5G42370	AT5G42370	AT5G42370	1.97973	0.0147989	Up
AT1G11175	AT1G11175	AT1G11175	1.97204	1.92e-07	Up
AT5G61820	AT5G61820	AT5G61820	1.96864	0.00343461	Up
AT1G20693	HMGB2	AT1G20693	1.96773	0.000162896	Up
AT5G60910	AGL8	AT5G60910	1.96604	4.69e-05	Up
AT2G21188	AT2G21188	AT2G21188	1.9658	0.0121038	Up
AT3G55290	AT3G55290	AT3G55290	1.96077	0.000606595	Up
AT1G66890	AT1G66890	AT1G66890	1.95671	7.22e-07	Up
AT1G72770	HAB1	AT1G72770	1.95643	3.87e-05	Up
AT4G37608	AT4G37608	AT4G37608	1.95639	0.000665018	Up
AT5G06795	AT5G06795	AT5G06795	1.95517	0.0293309	Up
AT5G42825	AT5G42825	AT5G42825	1.9526	0.00318009	Up
AT5G48670	AGL80	AT5G48670	1.95081	0.000874074	Up
AT5G66590	AT5G66590	AT5G66590	1.95054	0.00315017	Up
AT5G01445	AT5G01445	AT5G01445	1.95006	0.00880438	Up
AT1G01580	FRO2	AT1G01580	1.94652	0.0377397	Up
AT5G09445	AT5G09445	AT5G09445	1.94591	0.00870458	Up
AT1G30500	NF-YA7	AT1G30500	1.94458	0.000186365	Up
AT4G15490	UGT84A3	AT4G15490	1.9445	0.000101434	Up
AT2G08900	AT2G08900	AT2G08900	1.94298	0.000611268	Up
AT4G16190	AT4G16190	AT4G16190	1.93829	0.00138709	Up
AT1G53490	HEI10	AT1G53490	1.93793	0.0329532	Up
AT1G03070	AT1G03070	AT1G03070	1.93783	0.00681742	Up
AT4G16750	AT4G16750	AT4G16750	1.93775	0.00826801	Up
AT3G07725	AT3G07725	AT3G07725	1.93568	0.00169911	Up
AT5G66558	AT5G66558	AT5G66558	1.93328	0.0045096	Up
AT4G30450	AT4G30450	AT4G30450	1.93055	0.00308936	Up
AT3G05690	NF-YA2	AT3G05690	1.92872	0.000987715	Up
AT5G18850	AT5G18850	AT5G18850	1.92511	2.53e-05	Up
AT2G01175	AT2G01175	AT2G01175	1.92337	0.0362848	Up
AT1G01250	AT1G01250	AT1G01250	1.92327	0.0252397	Up
AT5G01195	AT5G01195	AT5G01195	1.92084	0.0451504	Up
AT2G23120	AT2G23120	AT2G23120	1.91506	0.000257251	Up
AT5G52450	AT5G52450	AT5G52450	1.91154	0.00212962	Up
AT3G27270	AT3G27270	AT3G27270	1.90827	0.000228585	Up
AT1G76180	ERD14	AT1G76180	1.90747	1.27e-06	Up
AT4G37150	MES9	AT4G37150	1.90547	0.028131	Up
AT2G13960	AT2G13960	AT2G13960	1.90005	0.0366064	Up
AT2G18170	MPK7	AT2G18170	1.89944	7.32e-06	Up
AT1G08857	AT1G08857	AT1G08857	1.8983	0.0139659	Up
AT1G45249	ABF2	AT1G45249	1.89763	7.1e-06	Up
ATMG09740	ATMG09740	ATMG09740	1.89633	0.000609596	Up
AT4G32200	ASY2	AT4G32200	1.89612	0.00126644	Up
AT5G41400	AT5G41400	AT5G41400	1.89493	0.000190094	Up
AT1G46768	RAP2.1	AT1G46768	1.89266	0.00360926	Up
AT4G18580	AT4G18580	AT4G18580	1.89242	0.00129994	Up
AT1G28070	AT1G28070	AT1G28070	1.89041	1.15e-06	Up
ATMG00670	ATMG00670	ATMG00670	1.88867	0.0162877	Up
AT2G07773	AT2G07773	AT2G07773	1.88835	0.00805436	Up
AT4G22950	AGL19	AT4G22950	1.88717	0.00834399	Up
AT3G62700	ABCC14	AT3G62700	1.88636	1.38e-10	Up
AT1G68500	AT1G68500	AT1G68500	1.88523	0.0493306	Up
AT4G14305	AT4G14305	AT4G14305	1.88402	0.0199803	Up
AT3G13275	AT3G13275	AT3G13275	1.87895	3.82e-05	Up
ATMG01370	ATMG01370	ATMG01370	1.87565	0.000174398	Up
AT1G75390	bZIP44	AT1G75390	1.87317	0.0159203	Up
AT5G57050	ABI2	AT5G57050	1.87238	0.00318571	Up
AT5G23460	AT5G23460	AT5G23460	1.87212	1.12e-08	Up
AT2G21187	AT2G21187	AT2G21187	1.87206	0.0377315	Up
AT4G02280	SUS3	AT4G02280	1.87022	0.00371837	Up
AT4G11350	AT4G11350	AT4G11350	1.86845	0.0018707	Up
AT2G27830	AT2G27830	AT2G27830	1.86257	0.0161903	Up
AT5G25890	IAA28	AT5G25890	1.8604	0.00177783	Up
AT5G46085	AT5G46085	AT5G46085	1.85794	0.0297372	Up
AT5G66790	AT5G66790	AT5G66790	1.85638	0.0183597	Up
AT3G02390	AT3G02390	AT3G02390	1.85399	0.0478889	Up
AT1G31790	AT1G31790	AT1G31790	1.85365	0.00847056	Up
AT2G19310	AT2G19310	AT2G19310	1.8504	0.000118509	Up
AT5G60460	AT5G60460	AT5G60460	1.84843	1.66e-09	Up
AT5G25450	AT5G25450	AT5G25450	1.84797	0.0130613	Up
AT1G49832	AT1G49832	AT1G49832	1.84624	0.0339185	Up
AT3G04255	AT3G04255	AT3G04255	1.84423	0.0352341	Up
AT3G07730	AT3G07730	AT3G07730	1.84237	0.00527341	Up
AT1G15400	AT1G15400	AT1G15400	1.83718	2.75e-08	Up
AT1G72510	AT1G72510	AT1G72510	1.83564	0.000299551	Up
AT4G26950	AT4G26950	AT4G26950	1.83021	0.0331598	Up
AT4G35790	PLDDELTA	AT4G35790	1.82985	4.24e-07	Up
AT1G69252	AT1G69252	AT1G69252	1.82822	9.33e-05	Up
AT2G23672	AT2G23672	AT2G23672	1.82694	3.1e-06	Up
AT4G25225	AT4G25225	AT4G25225	1.82375	1.32e-08	Up
AT2G25880	AUR2	AT2G25880	1.82253	0.0431906	Up
AT1G47560	SEC3B	AT1G47560	1.82172	0.0324028	Up
AT1G72210	AT1G72210	AT1G72210	1.82119	0.0384881	Up
AT2G39375	AT2G39375	AT2G39375	1.82063	0.0170961	Up
AT5G27930	AT5G27930	AT5G27930	1.81075	1.2e-09	Up
AT4G18390	TCP2	AT4G18390	1.80993	3.26e-09	Up
AT5G43150	AT5G43150	AT5G43150	1.80792	0.00109879	Up
AT1G16730	UP6	AT1G16730	1.80779	0.00176839	Up
AT2G35945	AT2G35945	AT2G35945	1.8072	0.000530462	Up
AT5G64180	AT5G64180	AT5G64180	1.80597	1.38e-06	Up
AT3G25870	AT3G25870	AT3G25870	1.80574	0.00254167	Up
AT1G68600	AT1G68600	AT1G68600	1.80543	0.0412346	Up
AT1G06473	AT1G06473	AT1G06473	1.80315	0.045758	Up
AT5G47640	NF-YB2	AT5G47640	1.80251	0.00028452	Up
AT4G12290	AT4G12290	AT4G12290	1.80247	0.01788	Up
AT1G76580	AT1G76580	AT1G76580	1.80133	0.00188927	Up
AT5G22290	NAC089	AT5G22290	1.79852	0.000358494	Up
ATMG00290	ATMG00290	ATMG00290	1.79738	0.0402755	Up
AT5G18340	AT5G18340	AT5G18340	1.79592	0.0110165	Up
AT1G72830	NF-YA3	AT1G72830	1.79283	0.000486824	Up
AT5G44572	AT5G44572	AT5G44572	1.79217	0.046856	Up
AT3G60110	AT3G60110	AT3G60110	1.79099	0.00206354	Up
AT5G09990	PROPEP5	AT5G09990	1.78897	0.00233994	Up
AT4G03600	AT4G03600	AT4G03600	1.78724	0.000204617	Up
AT5G61520	AT5G61520	AT5G61520	1.78692	0.0199602	Up
AT5G07080	AT5G07080	AT5G07080	1.78616	0.0157047	Up
AT1G66830	AT1G66830	AT1G66830	1.78572	0.00343241	Up
AT5G54075	U3D	AT5G54075	1.78557	0.00198604	Up
AT1G13930	AT1G13930	AT1G13930	1.78301	0.000298922	Up
AT3G24100	AT3G24100	AT3G24100	1.78113	1.32e-08	Up
AT5G53902	U3B	AT5G53902	1.77985	0.00132517	Up
AT3G21260	GLTP3	AT3G21260	1.77948	0.00606568	Up
AT4G36032	AT4G36032	AT4G36032	1.77935	1.15e-05	Up
AT2G47890	AT2G47890	AT2G47890	1.77674	0.0113668	Up
AT3G62650	AT3G62650	AT3G62650	1.77301	0.001877	Up
AT1G04733	U2.11	AT1G04733	1.773	0.00725792	Up
AT5G04000	AT5G04000	AT5G04000	1.7714	0.0402163	Up
AT5G22630	ADT5	AT5G22630	1.76949	0.0269616	Up
AT1G36380	AT1G36380	AT1G36380	1.76688	6.64e-05	Up
ATCG00380	rps4	ATCG00380	1.76478	7.73e-06	Up
AT2G07629	AT2G07629	AT2G07629	1.76416	0.0128658	Up
AT4G34881	AT4G34881	AT4G34881	1.76396	0.00146543	Up
AT2G07777	AT2G07777	AT2G07777	1.76362	0.000970411	Up
AT3G16650	AT3G16650	AT3G16650	1.76129	0.0038769	Up
AT1G69870	NRT1.7	AT1G69870	1.75918	0.00613833	Up
AT2G34200	AT2G34200	AT2G34200	1.75713	0.000989453	Up
AT4G39210	APL3	AT4G39210	1.75699	0.00607846	Up
AT4G26490	AT4G26490	AT4G26490	1.75652	0.010068	Up
ATCG00330	rps14	ATCG00330	1.75602	0.000880128	Up
AT2G46240	BAG6	AT2G46240	1.75539	0.0330015	Up
AT4G12400	Hop3	AT4G12400	1.75479	0.0126738	Up
AT1G71340	GDPD4	AT1G71340	1.75154	9.3e-07	Up
AT4G00380	FDM2	AT4G00380	1.74922	0.01278	Up
AT1G55917	AT1G55917	AT1G55917	1.74876	0.0339614	Up
AT2G36220	AT2G36220	AT2G36220	1.74872	0.0477116	Up
AT5G10770	AT5G10770	AT5G10770	1.7471	0.0176397	Up
AT3G52070	AT3G52070	AT3G52070	1.74631	0.000216441	Up
AT5G03640	AT5G03640	AT5G03640	1.74547	0.0242529	Up
AT5G59700	AT5G59700	AT5G59700	1.74251	4.87e-05	Up
AT1G59640	BPEp	AT1G59640	1.74175	0.00343312	Up
AT4G18830	OFP5	AT4G18830	1.74038	0.0143292	Up
ATMG00513	ATMG00513	ATMG00513	1.7399	0.00360926	Up
AT2G46490	AT2G46490	AT2G46490	1.73529	8.15e-10	Up
AT1G06002	AT1G06002	AT1G06002	1.73494	0.00526233	Up
AT2G43540	AT2G43540	AT2G43540	1.73386	2.14e-05	Up
AT1G03550	SCAMP4	AT1G03550	1.73235	0.0150558	Up
AT2G07698	AT2G07698	AT2G07698	1.73215	0.000135376	Up
AT1G24265	AT1G24265	AT1G24265	1.73197	0.0195427	Up
AT4G34590	GBF6	AT4G34590	1.72951	0.00612731	Up
AT1G55152	AT1G55152	AT1G55152	1.72899	0.000662821	Up
AT5G22608	AT5G22608	AT5G22608	1.72642	5.57e-06	Up
AT3G03590	AT3G03590	AT3G03590	1.72468	7.97e-07	Up
AT4G28240	AT4G28240	AT4G28240	1.72349	0.00623178	Up
AT4G35060	HIPP25	AT4G35060	1.72069	0.00807502	Up
AT3G23605	AT3G23605	AT3G23605	1.71981	3.4e-07	Up
AT5G64860	DPE1	AT5G64860	1.71962	0.00211807	Up
AT1G09453	AT1G09453	AT1G09453	1.71669	0.00975119	Up
AT3G47620	TCP14	AT3G47620	1.71475	6.12e-12	Up
AT3G53230	AtCDC48B	AT3G53230	1.71465	0.000243671	Up
AT5G03285	AT5G03285	AT5G03285	1.70906	0.00063448	Up
AT1G71130	CRF8	AT1G71130	1.70719	0.000284644	Up
AT3G23000	CIPK7	AT3G23000	1.70584	0.000150784	Up
AT3G23790	AAE16	AT3G23790	1.70426	0.0102548	Up
AT1G04570	AT1G04570	AT1G04570	1.70075	0.0441385	Up
AT1G20600	AT1G20600	AT1G20600	1.69803	4.33e-05	Up
AT4G36380	ROT3	AT4G36380	1.69694	0.0204217	Up
AT5G37550	AT5G37550	AT5G37550	1.69451	0.000368693	Up
ATCG00210	petN	ATCG00210	1.69419	0.000783793	Up
AT2G45660	AGL20	AT2G45660	1.69394	7.56e-07	Up
AT1G19396	AT1G19396	AT1G19396	1.69299	0.000717588	Up
AT1G80520	AT1G80520	AT1G80520	1.69195	8.2e-05	Up
AT3G10120	AT3G10120	AT3G10120	1.69168	0.00234523	Up
AT4G17695	KAN3	AT4G17695	1.69085	0.00297416	Up
AT5G16380	AT5G16380	AT5G16380	1.6908	0.000123147	Up
AT5G03240	UBQ3	AT5G03240	1.69037	0.000756692	Up
AT1G69610	AT1G69610	AT1G69610	1.68975	0.00633952	Up
AT3G59068	AT3G59068	AT3G59068	1.68713	0.00259001	Up
ATMG00410	ATMG00410	ATMG00410	1.68666	0.00152866	Up
AT3G06355	AT3G06355	AT3G06355	1.68647	0.000483194	Up
AT2G07741	AT2G07741	AT2G07741	1.68571	0.00162156	Up
AT5G61290	AT5G61290	AT5G61290	1.68539	0.00126644	Up
AT1G78600	LZF1	AT1G78600	1.68368	0.00126644	Up
AT4G23670	AT4G23670	AT4G23670	1.68341	0.000526961	Up
AT3G03520	NPC3	AT3G03520	1.68214	0.011677	Up
AT3G20300	AT3G20300	AT3G20300	1.68004	0.000530151	Up
ATCG01160	ATCG01160	ATCG01160	1.67961	0.00790196	Up
ATCG00970	ATCG00970	ATCG00970	1.67961	0.00790744	Up
ATMG01380	ATMG01380	ATMG01380	1.67789	0.00326968	Up
AT4G36515	AT4G36515	AT4G36515	1.67192	1.05e-06	Up
AT1G58235	AT1G58235	AT1G58235	1.67155	2.24e-05	Up
AT5G21020	AT5G21020	AT5G21020	1.67021	0.0016493	Up
AT1G64300	AT1G64300	AT1G64300	1.66755	0.00108362	Up
AT1G32640	MYC2	AT1G32640	1.66737	0.010497	Up
AT1G74660	MIF1	AT1G74660	1.66678	0.0182518	Up
AT5G03190	CPUORF47	AT5G03190	1.66347	4.99e-06	Up
AT5G49990	AT5G49990	AT5G49990	1.66089	0.00257703	Up
AT2G35795	AT2G35795	AT2G35795	1.66019	1.52e-08	Up
AT5G22788	AT5G22788	AT5G22788	1.65898	0.00116738	Up
AT4G09020	ISA3	AT4G09020	1.65807	0.00124677	Up
AT5G57790	AT5G57790	AT5G57790	1.65683	0.00281352	Up
ATCG00600	petG	ATCG00600	1.65682	0.00234814	Up
AT5G04760	AT5G04760	AT5G04760	1.65665	0.00235308	Up
AT5G16970	AER	AT5G16970	1.65571	0.00147695	Up
ATCG01080	ndhG	ATCG01080	1.65489	0.00985342	Up
AT3G13910	AT3G13910	AT3G13910	1.65486	0.000465562	Up
AT5G17860	CAX7	AT5G17860	1.65461	0.0215697	Up
AT3G14067	AT3G14067	AT3G14067	1.65316	4.94e-06	Up
ATCG00410	ATCG00410	ATCG00410	1.65272	0.00315891	Up
AT4G09890	AT4G09890	AT4G09890	1.65183	0.00735443	Up
AT1G53580	GLY3	AT1G53580	1.6485	5.04e-05	Up
AT1G04830	AT1G04830	AT1G04830	1.64809	2.63e-06	Up
AT1G35720	ANNAT1	AT1G35720	1.64787	0.000890252	Up
AT5G64430	AT5G64430	AT5G64430	1.64659	0.0133565	Up
AT4G12070	AT4G12070	AT4G12070	1.64631	0.00130685	Up
AT4G37970	CAD6	AT4G37970	1.64233	0.0168989	Up
AT1G52880	NAM	AT1G52880	1.64204	0.0201623	Up
ATMG00180	ccmFC	ATMG00180	1.64199	0.00278701	Up
AT1G78476	AT1G78476	AT1G78476	1.64137	0.0128212	Up
AT5G12050	AT5G12050	AT5G12050	1.64079	0.039002	Up
AT5G50160	FRO8	AT5G50160	1.63966	0.000192132	Up
AT3G15780	AT3G15780	AT3G15780	1.63811	0.003242	Up
AT5G37540	AT5G37540	AT5G37540	1.6378	0.0165276	Up
AT5G27750	AT5G27750	AT5G27750	1.63403	0.00263068	Up
AT5G24735	AT5G24735	AT5G24735	1.6337	0.000529847	Up
ATMG00730	ATMG00730	ATMG00730	1.63314	0.0263386	Up
AT2G45720	AT2G45720	AT2G45720	1.6326	7.03e-06	Up
AT5G63880	VPS20.1	AT5G63880	1.63204	0.00048486	Up
AT4G37470	KAI2	AT4G37470	1.6313	7.1e-06	Up
AT4G02005	AT4G02005	AT4G02005	1.6306	0.0122913	Up
AT2G42200	SPL9	AT2G42200	1.63045	0.0442806	Up
AT2G37900	AT2G37900	AT2G37900	1.62989	0.0176074	Up
ATMG01190	atp1	ATMG01190	1.62964	0.000306247	Up
AT5G66170	STR18	AT5G66170	1.62933	0.0201195	Up
AT1G28765	AT1G28765	AT1G28765	1.62922	0.00679818	Up
AT2G05765	AT2G05765	AT2G05765	1.62466	0.0226944	Up
AT3G16990	AT3G16990	AT3G16990	1.62145	0.00602253	Up
AT3G07735	AT3G07735	AT3G07735	1.62001	0.0290366	Up
AT5G27860	AT5G27860	AT5G27860	1.61918	8.19e-15	Up
AT5G50130	AT5G50130	AT5G50130	1.61772	0.000234921	Up
AT3G05640	AT3G05640	AT3G05640	1.6155	0.00576512	Up
AT5G59660	AT5G59660	AT5G59660	1.61464	0.0454654	Up
AT5G53590	AT5G53590	AT5G53590	1.61313	0.000270482	Up
AT3G01310	AT3G01310	AT3G01310	1.61179	0.000149414	Up
AT1G76720	AT1G76720	AT1G76720	1.60934	0.0013925	Up
AT1G52080	AR791	AT1G52080	1.60926	0.0149745	Up
AT2G43720	AT2G43720	AT2G43720	1.60627	0.0354688	Up
AT2G43375	AT2G43375	AT2G43375	1.60276	0.00801028	Up
AT2G04795	AT2G04795	AT2G04795	1.60178	0.0142916	Up
AT2G07719	AT2G07719	AT2G07719	1.60122	0.0203352	Up
AT2G22800	HAT9	AT2G22800	1.6005	0.00418745	Up
ATCG00050	rps16	ATCG00050	1.59556	4.67e-05	Up
AT1G23020	FRO3	AT1G23020	1.59414	0.0238727	Up
AT5G54145	AT5G54145	AT5G54145	1.5938	0.00684887	Up
AT5G13820	TBP1 AT5G13820	AT5G13820	1.59369	0.0136941	Up
AT3G20730	AT3G20730	AT3G20730	1.59317	0.00257877	Up
AT1G64890	AT1G64890	AT1G64890	1.59311	0.00219065	Up
AT3G43790	ZIFL2	AT3G43790	1.59201	0.0266522	Up
AT3G20910	NF-YA9	AT3G20910	1.58901	5.42e-05	Up
AT1G45163	AT1G45163	AT1G45163	1.5874	0.000172287	Up
AT2G36145	AT2G36145	AT2G36145	1.58723	0.000376622	Up
AT3G16770	EBP	AT3G16770	1.58564	0.0267499	Up
AT4G39730	PLAT1	AT4G39730	1.58282	1.78e-05	Up
AT5G49280	AT5G49280	AT5G49280	1.58255	0.0024005	Up
ATCG00090	ATCG00090	ATCG00090	1.58161	0.00501549	Up
AT5G40960	AT5G40960	AT5G40960	1.58078	0.00126644	Up
ATCG00300	psbZ	ATCG00300	1.57815	0.00758723	Up
AT2G12400	AT2G12400	AT2G12400	1.57791	0.00579962	Up
AT1G31460	AT1G31460	AT1G31460	1.57469	0.000143918	Up
AT1G65000	AT1G65000	AT1G65000	1.57238	0.0001596	Up
AT2G07707	AT2G07707 AT2G07707	AT2G07707	1.5721	0.000183377	Up
ATMG00480	AT2G07707 ATMG00480	ATMG00480	1.5721	0.000178122	Up
AT3G52800	AT3G52800	AT3G52800	1.5683	0.0152519	Up
AT2G19860	HXK2	AT2G19860	1.56204	1.89e-06	Up
AT5G04545	AT5G04545	AT5G04545	1.56199	0.0160819	Up
AT2G04240	XERICO	AT2G04240	1.56035	0.00155798	Up
AT1G20470	AT1G20470	AT1G20470	1.55915	0.0161418	Up
AT3G04030	MYR2	AT3G04030	1.55685	0.0220248	Up
AT4G34060	DML3	AT4G34060	1.55658	0.0428998	Up
AT2G39050	EULS3	AT2G39050	1.55459	0.00387136	Up
AT5G43850	ARD4	AT5G43850	1.55287	0.00315891	Up
AT1G55110	IDD7	AT1G55110	1.5519	0.000212605	Up
AT3G10450	SCPL7	AT3G10450	1.54975	0.0204084	Up
AT5G40210	UMAMIT42	AT5G40210	1.54871	0.00748425	Up
AT5G63160	BT1	AT5G63160	1.54774	0.0418755	Up
AT2G41640	AT2G41640	AT2G41640	1.54505	0.0374925	Up
AT3G53960	AT3G53960	AT3G53960	1.54446	0.00229392	Up
AT4G06780	AT4G06780	AT4G06780	1.54428	0.0305082	Up
AT3G17950	AT3G17950	AT3G17950	1.54178	0.000167347	Up
AT1G79075	AT1G79075	AT1G79075	1.54092	0.0111393	Up
AT4G03820	AT4G03820	AT4G03820	1.53985	0.0159561	Up
AT1G22640	MYB3	AT1G22640	1.53981	1.69e-06	Up
AT3G19030	AT3G19030	AT3G19030	1.53693	0.0120542	Up
AT3G61460	BRH1	AT3G61460	1.53679	0.000307831	Up
AT4G39180	SEC14	AT4G39180	1.53595	3.11e-05	Up
AT2G22840	GRF1 AT2G22840	AT2G22840	1.53529	0.00788893	Up
AT1G29465	AT1G29465	AT1G29465	1.53495	1.28e-05	Up
AT3G02832	AT3G02832	AT3G02832	1.53445	0.0368329	Up
ATCG00130	atpF	ATCG00130	1.53418	0.00208778	Up
AT5G03200	LUL1	AT5G03200	1.53329	0.0208389	Up
AT3G04230	AT3G04230	AT3G04230	1.53328	1.57e-05	Up
AT4G39925	AT4G39925	AT4G39925	1.53317	0.00612731	Up
AT2G18350	ZHD6	AT2G18350	1.52827	0.000368032	Up
AT5G61640	PMSR1	AT5G61640	1.52579	0.00754287	Up
AT5G23155	AT5G23155	AT5G23155	1.52577	0.0324474	Up
AT4G35560	DAW1	AT4G35560	1.52419	0.0124617	Up
AT5G06280	AT5G06280	AT5G06280	1.52319	0.000110808	Up
AT1G15885	AT1G15885	AT1G15885	1.52061	0.000225431	Up
AT5G06165	AT5G06165	AT5G06165	1.52042	0.0136781	Up
AT1G12200	FMO	AT1G12200	1.51884	0.0174196	Up
AT1G11270	AT1G11270	AT1G11270	1.51797	0.00249275	Up
AT3G17070	AT3G17070	AT3G17070	1.51707	0.0437421	Up
AT1G60610	AT1G60610	AT1G60610	1.51645	0.0124617	Up
AT4G01910	AT4G01910	AT4G01910	1.51529	0.0140847	Up
AT2G17280	AT2G17280	AT2G17280	1.51505	0.0258749	Up
AT3G22200	POP2	AT3G22200	1.51445	2.81e-05	Up
AT5G57150	AT5G57150	AT5G57150	1.51424	0.0162861	Up
AT5G61880	AT5G61880	AT5G61880	1.5115	0.0119566	Up
AT4G05150	AT4G05150	AT4G05150	1.51091	0.000471229	Up
AT4G31870	GPX7	AT4G31870	1.51082	0.000762165	Up
AT5G47180	AT5G47180	AT5G47180	1.50726	0.00043238	Up
AT1G56700	AT1G56700	AT1G56700	1.50676	0.00836479	Up
AT1G31835	AT1G31835	AT1G31835	1.50636	0.019302	Up
AT1G09800	AT1G09800	AT1G09800	1.50502	0.00940556	Up
AT1G54210	ATG12A	AT1G54210	1.50497	0.00364805	Up
AT5G60850	OBP4	AT5G60850	1.50281	0.00140418	Up
AT5G03460	AT5G03460	AT5G03460	1.5018	1.19e-07	Up
AT1G07130	STN1	AT1G07130	1.49769	0.00156957	Up
AT3G51500	AT3G51500	AT3G51500	1.4966	2.24e-05	Up
AT4G18930	AT4G18930	AT4G18930	1.49616	0.0210407	Up
AT3G62860	AT3G62860	AT3G62860	1.49316	0.011981	Up
AT4G27130	AT4G27130	AT4G27130	1.49315	0.00110419	Up
AT3G27880	AT3G27880	AT3G27880	1.49259	0.0134138	Up
AT1G24210	AT1G24210	AT1G24210	1.49174	0.00801198	Up
AT1G28230	PUP1	AT1G28230	1.49132	0.0228598	Up
AT5G09630	AT5G09630	AT5G09630	1.49117	0.00413533	Up
ATMG01000	ATMG01000	ATMG01000	1.49113	0.00585052	Up
AT3G08275	AT3G08275	AT3G08275	1.48985	0.0428763	Up
AT4G34680	GATA3	AT4G34680	1.48971	0.0011707	Up
AT1G52990	AT1G52990	AT1G52990	1.48678	0.0128362	Up
AT1G77370	AT1G77370	AT1G77370	1.48643	8.19e-05	Up
AT3G21150	BBX32	AT3G21150	1.48575	0.0150558	Up
AT1G28540	AT1G28540	AT1G28540	1.4856	4.93e-06	Up
AT5G18860	NSH3	AT5G18860	1.48551	0.00564144	Up
AT3G62690	ATL5 AT3G62690	AT3G62690	1.48441	0.0046412	Up
AT5G65480	AT5G65480	AT5G65480	1.48423	3.69e-05	Up
ATCG00500	accD	ATCG00500	1.48421	8.16e-07	Up
AT4G36980	AT4G36980	AT4G36980	1.48368	1.69e-08	Up
AT1G79160	AT1G79160	AT1G79160	1.48315	0.00169172	Up
AT2G18440	GUT15	AT2G18440	1.48239	0.000204873	Up
AT5G43440	AT5G43440	AT5G43440	1.48233	0.0214417	Up
AT1G19310	AT1G19310	AT1G19310	1.48069	0.00196269	Up
AT3G54200	AT3G54200	AT3G54200	1.47971	0.0025206	Up
AT5G65830	RLP57	AT5G65830	1.47848	0.00140728	Up
AT2G40130	AT2G40130	AT2G40130	1.47798	0.00169334	Up
AT1G77580	AT1G77580	AT1G77580	1.47759	0.00192238	Up
AT2G46670	AT2G46670	AT2G46670	1.47377	1.33e-05	Up
AT1G68770	AT1G68770	AT1G68770	1.47181	0.000135773	Up
AT2G05185	AT2G05185	AT2G05185	1.47065	0.000981706	Up
AT3G21270	DOF2	AT3G21270	1.4705	0.00308936	Up
AT1G49245	AT1G49245	AT1G49245	1.47011	1.57e-06	Up
AT2G15970	COR413-PM1	AT2G15970	1.46907	0.00512835	Up
AT5G65380	AT5G65380	AT5G65380	1.46755	3.79e-05	Up
AT4G31510	AT4G31510	AT4G31510	1.46747	0.00768332	Up
AT5G10310	AT5G10310	AT5G10310	1.46746	0.0164636	Up
AT5G07920	DGK1	AT5G07920	1.46668	9.62e-05	Up
AT5G58690	PLC5	AT5G58690	1.46484	0.0228894	Up
AT3G03440	AT3G03440	AT3G03440	1.46476	0.0136701	Up
AT4G34550	AT4G34550	AT4G34550	1.46188	0.0403411	Up
AT3G11420	AT3G11420	AT3G11420	1.46182	0.00296946	Up
ATCG00960	ATCG00960	ATCG00960	1.46178	0.0272667	Up
AT1G07040	AT1G07040	AT1G07040	1.46159	0.0102945	Up
AT4G30630	AT4G30630	AT4G30630	1.46125	2.7e-06	Up
ATCG01170	ATCG01170	ATCG01170	1.46091	0.0273333	Up
AT3G02910	AT3G02910	AT3G02910	1.46074	0.012842	Up
AT3G03165	AT3G03165	AT3G03165	1.45776	0.0140847	Up
AT4G23000	AT4G23000	AT4G23000	1.45408	0.0470681	Up
AT3G15358	AT3G15358	AT3G15358	1.45285	0.00772597	Up
AT1G52800	AT1G52800	AT1G52800	1.451	0.0320045	Up
AT5G53450	ORG1	AT5G53450	1.44666	0.0112097	Up
AT3G07940	AT3G07940	AT3G07940	1.44579	6.58e-07	Up
AT3G55760	AT3G55760	AT3G55760	1.44493	0.00383757	Up
AT2G37580	AT2G37580	AT2G37580	1.44394	0.011875	Up
AT5G48480	AT5G48480	AT5G48480	1.44261	0.00030855	Up
AT3G14430	AT3G14430	AT3G14430	1.44102	0.000109338	Up
AT5G28380	AT5G28380	AT5G28380	1.4391	0.0252169	Up
AT5G65140	TPPJ	AT5G65140	1.43902	0.0110338	Up
AT2G07695	AT2G07695	AT2G07695	1.43574	0.0377248	Up
AT1G08507	AT1G08507	AT1G08507	1.43462	0.0141957	Up
AT1G73630	AT1G73630	AT1G73630	1.4344	0.0131288	Up
AT5G57815	AT5G57815	AT5G57815	1.43427	0.000791928	Up
AT5G16160	AT5G16160	AT5G16160	1.43382	0.0236575	Up
AT3G03270	AT3G03270	AT3G03270	1.43171	0.0176033	Up
AT3G18950	AT3G18950	AT3G18950	1.43045	0.0278444	Up
AT3G06210	AT3G06210	AT3G06210	1.42987	0.00492282	Up
AT1G29418	AT1G29418	AT1G29418	1.42737	0.00135076	Up
AT3G29330	AT3G29330	AT3G29330	1.42559	0.000335315	Up
AT1G73880	UGT89B1	AT1G73880	1.42258	0.00456186	Up
AT3G48115	AT3G48115	AT3G48115	1.42156	0.000885789	Up
AT3G21790	AT3G21790	AT3G21790	1.42004	0.00215528	Up
AT2G38050	DET2	AT2G38050	1.41948	3.6e-05	Up
ATCG00190	rpoB	ATCG00190	1.41871	0.00580909	Up
AT3G15115	AT3G15115	AT3G15115	1.41854	0.000363602	Up
AT1G62660	AT1G62660	AT1G62660	1.41756	0.000131038	Up
AT1G01640	AT1G01640	AT1G01640	1.41719	0.035074	Up
AT3G41979	AT2G01020 AT3G41979	AT3G41979	1.41712	0.00516625	Up
AT3G24760	AT3G24760	AT3G24760	1.41528	0.000231789	Up
AT1G20160	ATSBT5.2	AT1G20160	1.41482	0.0264093	Up
AT4G34980	SLP2 AT4G34980	AT4G34980	1.41453	0.0147337	Up
AT1G08973	AT1G08973	AT1G08973	1.41388	0.000810187	Up
AT1G72810	AT1G72810	AT1G72810	1.41299	0.0128056	Up
AT4G04620	ATG8B	AT4G04620	1.41275	0.00234345	Up
AT5G42980	TRX3	AT5G42980	1.41245	0.00315891	Up
AT5G25120	CYP71B11	AT5G25120	1.4114	0.0490634	Up
AT1G04070	TOM22-I	AT1G04070	1.41127	6.96e-05	Up
AT4G26130	AT4G26130	AT4G26130	1.41053	0.00903959	Up
AT1G51550	AT1G51550	AT1G51550	1.4102	0.000486824	Up
AT3G62660	GATL7	AT3G62660	1.40797	7.96e-05	Up
AT5G02480	AT5G02480	AT5G02480	1.40745	4.59e-06	Up
AT1G34110	AT1G34110	AT1G34110	1.40697	0.00250675	Up
ATCG00650	rps18	ATCG00650	1.40653	0.000214331	Up
AT5G37780	CAM1	AT5G37780	1.40529	1.17e-05	Up
AT1G73790	GIP2	AT1G73790	1.40465	3.63e-06	Up
ATMG00690	ATMG00690	ATMG00690	1.40464	0.0053368	Up
AT1G78265	AT1G78265	AT1G78265	1.40442	0.00116921	Up
ATCG01200	ATCG01200	ATCG01200	1.40441	0.0390131	Up
AT4G18050	ABCB9	AT4G18050	1.40359	0.0324247	Up
AT2G22660	AT2G22660	AT2G22660	1.40281	0.00104774	Up
AT5G02560	HTA12	AT5G02560	1.40175	0.00298954	Up
AT1G53780	AT1G53780	AT1G53780	1.39899	0.0126738	Up
AT2G22190	TPPE	AT2G22190	1.3985	0.00887916	Up
AT5G56160	AT5G56160	AT5G56160	1.39799	0.0334846	Up
AT1G67340	AT1G67340	AT1G67340	1.39794	0.00278701	Up
AT5G65575	AT5G65575	AT5G65575	1.39703	2.37e-07	Up
AT4G34560	AT4G34560	AT4G34560	1.39585	0.000473992	Up
AT1G29395	COR413IM1	AT1G29395	1.39249	0.0456871	Up
AT1G05065	CLE20	AT1G05065	1.39241	0.00383757	Up
ATCG00930	ATCG00930	ATCG00930	1.39048	0.0439252	Up
AT4G25434	NUDT10	AT4G25434	1.39025	0.0345664	Up
AT2G01020	AT2G01020 AT2G01020	AT2G01020	1.38977	0.00601692	Up
AT4G38932	AT4G38932	AT4G38932	1.38968	0.00218485	Up
AT1G25370	AT1G25370	AT1G25370	1.38833	0.0237975	Up
AT2G41870	AT2G41870	AT2G41870	1.38826	0.0127037	Up
AT1G07300	AT1G07300	AT1G07300	1.38817	0.0380043	Up
AT3G47510	AT3G47510	AT3G47510	1.38814	0.00607604	Up
AT1G75400	AT1G75400	AT1G75400	1.38798	0.000310423	Up
AT5G18525	AT5G18525	AT5G18525	1.38719	0.00559915	Up
AT2G26211	ath-MIR825	AT2G26211	1.38486	0.0425842	Up
AT1G79270	ECT8	AT1G79270	1.38326	0.0101403	Up
AT5G57610	AT5G57610	AT5G57610	1.38209	8.75e-05	Up
AT2G28350	ARF10	AT2G28350	1.38044	0.0115347	Up
ATCG00540	petA	ATCG00540	1.37914	0.00380719	Up
AT1G22770	GI	AT1G22770	1.37545	3.84e-05	Up
AT3G09085	AT3G09085	AT3G09085	1.37488	3.13e-06	Up
AT1G71960	ABCG25	AT1G71960	1.37485	0.0200044	Up
AT2G20410	AT2G20410	AT2G20410	1.36983	0.000245922	Up
AT3G24730	AT3G24730	AT3G24730	1.36944	8.55e-06	Up
AT1G79970	AT1G79970	AT1G79970	1.36752	5.29e-08	Up
AT5G49550	BLOS2	AT5G49550	1.36646	9.71e-08	Up
AT4G39366	AT4G39366	AT4G39366	1.36573	0.000970775	Up
AT1G78490	CYP708A3	AT1G78490	1.36446	0.024057	Up
AT3G07260	AT3G07260	AT3G07260	1.36379	6.79e-05	Up
AT3G10250	AT3G10250	AT3G10250	1.36305	0.00235289	Up
AT3G21250	ABCC8	AT3G21250	1.35776	0.0126738	Up
ATCG00180	rpoC1	ATCG00180	1.35659	0.00151694	Up
AT1G17830	AT1G17830	AT1G17830	1.35297	0.0362722	Up
AT4G38495	AT4G38495	AT4G38495	1.35199	4.05e-05	Up
AT3G55740	PROT2	AT3G55740	1.34914	0.000310804	Up
AT3G07360	PUB9	AT3G07360	1.34891	2.28e-05	Up
AT4G12460	ORP2B	AT4G12460	1.34869	7e-08	Up
AT2G27470	NF-YB11	AT2G27470	1.34854	0.002934	Up
AT2G43500	AT2G43500	AT2G43500	1.34672	0.0053368	Up
AT1G69160	AT1G69160	AT1G69160	1.34492	0.0479695	Up
AT3G03310	LCAT3	AT3G03310	1.34132	0.0171864	Up
AT5G66040	STR16	AT5G66040	1.34129	0.0274335	Up
AT5G20885	AT5G20885	AT5G20885	1.34093	9.3e-07	Up
AT3G18310	AT3G18310	AT3G18310	1.3409	0.000989453	Up
AT3G16740	AT3G16740	AT3G16740	1.34008	0.00532675	Up
AT1G69760	AT1G69760	AT1G69760	1.34004	0.00376708	Up
AT1G06263	AT1G06263	AT1G06263	1.33987	0.015271	Up
AT2G42790	CSY3	AT2G42790	1.33906	0.00734358	Up
AT3G14595	AT3G14595	AT3G14595	1.33845	0.000970775	Up
AT2G43310	AT2G43310	AT2G43310	1.33562	0.00335143	Up
AT2G07674	AT2G07674	AT2G07674	1.335	0.0147989	Up
AT3G22180	AT3G22180	AT3G22180	1.33421	0.00287059	Up
AT2G21620	RD2	AT2G21620	1.33166	0.00391981	Up
AT2G22850	bZIP6	AT2G22850	1.32977	0.00734358	Up
AT4G26080	ABI1	AT4G26080	1.32898	0.010736	Up
AT4G17770	TPS5	AT4G17770	1.32862	0.0311878	Up
AT1G15960	NRAMP6	AT1G15960	1.32524	0.00746469	Up
AT1G68340	AT1G68340	AT1G68340	1.32316	0.0393242	Up
AT5G09690	MGT7	AT5G09690	1.32289	0.0292563	Up
AT2G22240	MIPS2	AT2G22240	1.32131	0.0252381	Up
AT2G33590	CRL1	AT2G33590	1.32126	0.0117935	Up
AT1G69970	CLE26	AT1G69970	1.32065	0.0266953	Up
AT1G67660	AT1G67660	AT1G67660	1.31807	0.0200194	Up
AT5G53350	CLPX	AT5G53350	1.31786	0.000252978	Up
AT1G25211	AT1G25211	AT1G25211	1.31736	0.00494724	Up
AT5G09225	AT5G09225	AT5G09225	1.31426	8.91e-05	Up
ATCG01280	ycf2 ATCG01280	ATCG01280	1.31413	0.00645741	Up
AT3G15210	ERF4	AT3G15210	1.31286	0.0278386	Up
AT1G07440	AT1G07440	AT1G07440	1.31173	0.0110165	Up
AT1G58150	AT1G58150	AT1G58150	1.30918	0.0402823	Up
AT3G08690	UBC11	AT3G08690	1.30864	0.00626259	Up
AT5G24980	AT5G24980	AT5G24980	1.3084	0.00010196	Up
AT2G30860	GSTF9	AT2G30860	1.30824	0.00255832	Up
AT3G02875	ILR1	AT3G02875	1.30571	0.0113116	Up
AT4G29820	CFIM-25	AT4G29820	1.30571	0.0203352	Up
AT1G28960	NUDX15	AT1G28960	1.30517	3.3e-05	Up
ATCG00860	ycf2 ATCG00860	ATCG00860	1.30452	0.00615471	Up
AT2G23430	ICK1	AT2G23430	1.3043	0.000877499	Up
AT2G27190	PAP12	AT2G27190	1.30346	0.0132591	Up
AT4G04925	AT4G04925	AT4G04925	1.30255	0.000185368	Up
AT4G31570	AT4G31570	AT4G31570	1.30086	0.00221462	Up
AT2G22420	AT2G22420	AT2G22420	1.29677	0.0293309	Up
AT4G03490	AT4G03490	AT4G03490	1.29615	2.29e-06	Up
AT5G41960	AT5G41960	AT5G41960	1.29557	0.000340998	Up
AT4G01120	GBF2	AT4G01120	1.29545	0.00129922	Up
AT1G51140	FBH3	AT1G51140	1.29538	0.000115279	Up
ATCG01040	ccsA	ATCG01040	1.29339	0.00269326	Up
AT1G29357	AT1G29357	AT1G29357	1.29273	0.00679818	Up
AT5G04660	CYP77A4	AT5G04660	1.29266	0.0450789	Up
AT3G19380	PUB25	AT3G19380	1.28917	0.0157822	Up
AT1G66410	CAM4	AT1G66410	1.28678	2.17e-05	Up
AT5G04750	AT5G04750	AT5G04750	1.28598	0.00612968	Up
AT1G49660	CXE5	AT1G49660	1.28552	0.00379213	Up
AT1G24450	NFD2	AT1G24450	1.28545	0.000987715	Up
AT2G47180	GolS1	AT2G47180	1.28515	0.0479205	Up
AT3G62920	AT3G62920	AT3G62920	1.28511	3.48e-05	Up
AT5G06670	AT5G06670	AT5G06670	1.28374	0.0284158	Up
AT1G75810	AT1G75810	AT1G75810	1.2836	0.00190335	Up
AT3G45210	AT3G45210	AT3G45210	1.28355	0.00793935	Up
AT4G12300	CYP706A4	AT4G12300	1.28241	0.00554185	Up
AT2G05630	ATG8D	AT2G05630	1.28223	0.00622205	Up
ATMG01360	cox1	ATMG01360	1.28186	0.0268831	Up
AT3G21690	AT3G21690	AT3G21690	1.28101	0.00193498	Up
AT5G54080	HGO	AT5G54080	1.2789	0.0275012	Up
AT2G46600	AT2G46600	AT2G46600	1.27811	0.0402823	Up
AT4G09695	AT4G09695	AT4G09695	1.27352	0.0430034	Up
AT5G13180	NAC083	AT5G13180	1.27342	0.00289171	Up
AT1G09487	AT1G09487	AT1G09487	1.27333	0.000888328	Up
AT3G61830	ARF18	AT3G61830	1.27139	0.0209063	Up
AT2G07042	AT2G07042	AT2G07042	1.26982	0.0111151	Up
AT3G18440	ALMT9	AT3G18440	1.2687	8.44e-05	Up
AT4G32850	nPAP	AT4G32850	1.26777	2.77e-05	Up
AT1G15800	AT1G15800	AT1G15800	1.26766	0.0306031	Up
AT2G07585	AT2G07585	AT2G07585	1.26612	0.00162131	Up
AT5G05435	AT5G05435	AT5G05435	1.266	0.00904591	Up
AT1G69280	AT1G69280	AT1G69280	1.26502	0.0148586	Up
AT3G09745	AT3G09745	AT3G09745	1.26482	0.0164409	Up
AT2G05520	GRP-3	AT2G05520	1.25939	0.00834399	Up
AT2G45315	AT2G45315	AT2G45315	1.2593	0.00457396	Up
AT5G63135	AT5G63135	AT5G63135	1.25562	4.29e-05	Up
AT1G50570	AT1G50570	AT1G50570	1.25508	3.67e-06	Up
AT1G28260	AT1G28260	AT1G28260	1.2535	0.0489058	Up
AT3G05030	NHX2	AT3G05030	1.25235	0.00950099	Up
AT2G46390	SDH8	AT2G46390	1.2517	0.000384427	Up
AT4G24972	TPD1	AT4G24972	1.25069	0.0404209	Up
AT4G11600	GPX6	AT4G11600	1.2492	0.00890334	Up
AT3G48120	AT3G48120	AT3G48120	1.24663	0.00590086	Up
AT4G11960	PGRL1B	AT4G11960	1.24483	0.00168578	Up
AT5G41810	AT5G41810	AT5G41810	1.24358	6.71e-06	Up
AT2G19350	AT2G19350	AT2G19350	1.2426	0.00587602	Up
AT1G16916	AT1G16916	AT1G16916	1.24245	3.87e-05	Up
AT1G22490	AT1G22490	AT1G22490	1.24157	0.0437477	Up
AT4G09500	AT4G09500	AT4G09500	1.24128	0.0418877	Up
AT4G06701	AT4G06701	AT4G06701	1.24088	0.00126152	Up
AT1G56280	DI19	AT1G56280	1.24023	0.0007746	Up
AT3G06125	AT3G06125	AT3G06125	1.23933	0.00479153	Up
AT4G09490	AT4G09490	AT4G09490	1.23886	0.000778818	Up
AT3G51880	HMGB1	AT3G51880	1.23884	2.37e-05	Up
AT5G07730	AT5G07730	AT5G07730	1.23834	0.013897	Up
AT2G27580	AT2G27580	AT2G27580	1.23796	0.00146393	Up
AT4G10330	AT4G10330	AT4G10330	1.23706	5.42e-06	Up
AT3G58530	AT3G58530	AT3G58530	1.23645	0.0193435	Up
AT5G66360	DIM1B	AT5G66360	1.23638	1.24e-05	Up
AT3G16640	TCTP	AT3G16640	1.23316	1.92e-07	Up
AT3G04730	IAA16	AT3G04730	1.23313	7.63e-07	Up
AT1G15350	AT1G15350	AT1G15350	1.2298	0.00299794	Up
AT2G13665	AT2G13665	AT2G13665	1.22973	0.0113669	Up
AT2G34585	AT2G34585	AT2G34585	1.22804	1.69e-06	Up
AT5G43260	AT5G43260	AT5G43260	1.2279	0.00421615	Up
AT5G45275	AT5G45275	AT5G45275	1.22615	0.000156185	Up
AT4G38020	AT4G38020	AT4G38020	1.22582	0.00258017	Up
ATCG00160	rps2	ATCG00160	1.22384	0.00426772	Up
AT1G20696	HMGB3	AT1G20696	1.2238	0.000885789	Up
AT3G18530	AT3G18530	AT3G18530	1.22363	0.0215608	Up
AT3G47600	MYB94	AT3G47600	1.22178	0.00338769	Up
AT1G64950	CYP89A5	AT1G64950	1.2187	0.00270476	Up
AT5G46920	AT5G46920	AT5G46920	1.21442	0.000522791	Up
AT4G27020	AT4G27020	AT4G27020	1.21423	0.00115376	Up
AT1G67300	AT1G67300	AT1G67300	1.21331	0.00164202	Up
AT1G72010	AT1G72010	AT1G72010	1.21327	0.00162155	Up
AT3G48185	AT3G48185	AT3G48185	1.21271	0.00629846	Up
AT5G57565	AT5G57565	AT5G57565	1.21195	0.032075	Up
AT2G23340	DEAR3	AT2G23340	1.21092	0.0489307	Up
ATMG01090	ATMG01090	ATMG01090	1.21022	0.0436063	Up
AT4G00630	KEA2	AT4G00630	1.20928	6.73e-05	Up
AT3G47680	AT3G47680	AT3G47680	1.20855	0.00084408	Up
AT1G05060	AT1G05060	AT1G05060	1.20848	0.0150029	Up
AT2G28360	AT2G28360	AT2G28360	1.20812	6.14e-05	Up
AT3G26580	AT3G26580	AT3G26580	1.2068	0.00940556	Up
AT5G25560	AT5G25560	AT5G25560	1.20613	0.0010122	Up
AT5G35450	AT5G35450	AT5G35450	1.20406	0.0054167	Up
AT3G11440	MYB65	AT3G11440	1.20325	0.0233763	Up
AT1G64490	AT1G64490	AT1G64490	1.20281	0.00305781	Up
AT2G23090	AT2G23090	AT2G23090	1.20205	1.52e-07	Up
AT3G25400	AT3G25400	AT3G25400	1.20082	0.0288943	Up
AT1G70518	AT1G70518	AT1G70518	1.19811	0.00239369	Up
AT1G50950	AT1G50950	AT1G50950	1.19744	0.00111367	Up
AT4G34630	AT4G34630	AT4G34630	1.19675	0.0361762	Up
ATCG00220	psbM	ATCG00220	1.19459	0.0287221	Up
AT1G65440	GTB1	AT1G65440	1.19372	0.000373349	Up
AT2G21940	SK1	AT2G21940	1.19366	4.65e-05	Up
AT3G20620	AT3G20620	AT3G20620	1.19365	0.000783793	Up
AT3G23910	AT3G23910	AT3G23910	1.19343	0.00799926	Up
AT1G27921	AT1G27921	AT1G27921	1.19318	0.00120571	Up
AT1G01725	AT1G01725	AT1G01725	1.19251	0.0455064	Up
AT2G01540	AT2G01540	AT2G01540	1.19091	0.00746469	Up
AT5G41700	UBC8	AT5G41700	1.19005	0.00213897	Up
AT5G18040	AT5G18040	AT5G18040	1.18714	0.0347879	Up
AT3G54680	AT3G54680	AT3G54680	1.18625	0.00634049	Up
AT5G04080	AT5G04080	AT5G04080	1.18511	0.00373819	Up
AT5G65495	AT5G65495	AT5G65495	1.18484	0.000334262	Up
AT3G15095	HCF243	AT3G15095	1.18466	0.0102422	Up
AT5G66880	SNRK2.3	AT5G66880	1.18437	0.000868206	Up
AT5G06665	AT5G06665	AT5G06665	1.18399	0.0387608	Up
AT3G53370	AT3G53370	AT3G53370	1.1833	0.00437779	Up
AT2G33435	AT2G33435	AT2G33435	1.18307	0.00625683	Up
AT2G34730	AT2G34730	AT2G34730	1.18254	0.012219	Up
AT5G53800	AT5G53800	AT5G53800	1.18182	0.000174398	Up
AT2G20400	AT2G20400	AT2G20400	1.18142	0.00966228	Up
AT2G44430	AT2G44430	AT2G44430	1.18072	0.00156096	Up
AT5G16550	AT5G16550	AT5G16550	1.18051	0.000218748	Up
AT1G75540	BBX21	AT1G75540	1.18019	2.53e-05	Up
AT2G18240	AT2G18240	AT2G18240	1.18017	0.00490457	Up
AT1G78130	UNE2	AT1G78130	1.17998	0.0260637	Up
AT4G31860	AT4G31860	AT4G31860	1.17993	0.0203352	Up
AT4G39838	AT4G39838	AT4G39838	1.1798	0.0406949	Up
AT5G01990	AT5G01990	AT5G01990	1.17785	0.0135696	Up
AT1G19397	AT1G19397	AT1G19397	1.17776	0.0351987	Up
AT5G59050	AT5G59050	AT5G59050	1.17613	0.0075675	Up
AT1G67530	AT1G67530	AT1G67530	1.17597	0.00355386	Up
AT2G19830	SNF7.2	AT2G19830	1.1749	3.78e-05	Up
AT1G27930	AT1G27930	AT1G27930	1.1739	0.000133076	Up
AT5G63905	AT5G63905	AT5G63905	1.17305	0.0234901	Up
AT5G42850	AT5G42850	AT5G42850	1.17241	0.000487097	Up
AT1G80780	AT1G80780	AT1G80780	1.17166	4.72e-10	Up
AT5G41920	AT5G41920	AT5G41920	1.17111	0.00827513	Up
AT5G20650	COPT5	AT5G20650	1.17093	2.08e-07	Up
AT3G54366	AT3G54366	AT3G54366	1.16875	0.00220685	Up
AT4G17550	G3Pp4	AT4G17550	1.16818	0.0027607	Up
AT1G76560	CP12-3	AT1G76560	1.16766	0.0210959	Up
AT5G27670	HTA7	AT5G27670	1.16749	0.00065266	Up
AT4G32150	VAMP711	AT4G32150	1.16717	0.00489899	Up
AT3G08760	ATSIK	AT3G08760	1.16639	0.0479205	Up
AT1G77400	AT1G77400	AT1G77400	1.16585	0.0425858	Up
AT4G21980	APG8A	AT4G21980	1.16528	0.0443319	Up
AT4G12850	AT4G12850	AT4G12850	1.16499	0.0199568	Up
AT1G77290	AT1G77290	AT1G77290	1.16492	0.0159074	Up
AT1G62050	AT1G62050	AT1G62050	1.16459	0.00739696	Up
AT1G52855	AT1G52855	AT1G52855	1.16424	0.0418947	Up
AT1G64080	MAKR2	AT1G64080	1.16406	0.0198502	Up
AT5G17520	RCP1	AT5G17520	1.16318	0.0047085	Up
AT5G45610	SUV2	AT5G45610	1.16189	0.00301698	Up
AT1G01420	UGT72B3	AT1G01420	1.16132	0.0228138	Up
AT5G02880	UPL4	AT5G02880	1.16055	0.00846662	Up
AT5G50840	AT5G50840	AT5G50840	1.15937	0.000136354	Up
AT1G79520	AT1G79520	AT1G79520	1.15689	0.0208389	Up
AT5G52550	AT5G52550	AT5G52550	1.15471	0.000375653	Up
AT4G38730	AT4G38730	AT4G38730	1.1544	0.00561749	Up
AT2G03890	PI4K GAMMA 7	AT2G03890	1.15412	1.31e-05	Up
AT3G09770	LOG2 AT3G09770	AT3G09770	1.15338	0.00119499	Up
AT3G07410	RABA5b	AT3G07410	1.15098	0.0309609	Up
AT3G23610	DSPTP1	AT3G23610	1.14976	0.000585554	Up
AT5G11600	AT5G11600	AT5G11600	1.14831	0.0122496	Up
AT2G40840	DPE2	AT2G40840	1.14202	0.00892303	Up
AT1G77280	AT1G77280	AT1G77280	1.14057	0.0319187	Up
AT1G73660	AT1G73660	AT1G73660	1.14044	0.000198193	Up
AT2G32090	AT2G32090	AT2G32090	1.14003	0.000863998	Up
AT5G27730	AT5G27730	AT5G27730	1.13605	0.0002158	Up
AT4G18520	AT4G18520	AT4G18520	1.13507	0.000566665	Up
AT3G54020	AtIPCS1	AT3G54020	1.13346	0.0186496	Up
AT3G23570	AT3G23570	AT3G23570	1.13261	0.0425842	Up
AT1G78680	GGH2	AT1G78680	1.13181	0.026539	Up
AT4G35300	TMT2	AT4G35300	1.13162	0.00158182	Up
AT2G02370	AT2G02370	AT2G02370	1.13099	0.0389059	Up
AT5G35560	AT5G35560	AT5G35560	1.13093	0.00104774	Up
AT1G25098	AT1G25098	AT1G25098	1.1303	1.4e-07	Up
AT4G24370	PROS	AT4G24370	1.13029	2.32e-05	Up
AT4G38580	FP6	AT4G38580	1.13005	0.0112009	Up
AT5G50780	AT5G50780	AT5G50780	1.12901	0.0294166	Up
AT3G58900	AT3G58900	AT3G58900	1.12898	0.00108652	Up
AT3G44100	AT3G44100	AT3G44100	1.12789	0.00335154	Up
AT5G45010	DSS1(V)	AT5G45010	1.12694	5.39e-05	Up
AT3G26395	AT3G26395	AT3G26395	1.12574	0.000540432	Up
AT5G12840	NF-YA1	AT5G12840	1.12346	0.000868206	Up
AT2G44310	AT2G44310	AT2G44310	1.12096	3.48e-06	Up
AT3G28950	AT3G28950	AT3G28950	1.11949	0.0284282	Up
AT1G25175	AT1G25175	AT1G25175	1.11898	1.44e-07	Up
AT1G27150	AT1G27150	AT1G27150	1.11701	0.0178341	Up
AT3G17820	GLN1.3	AT3G17820	1.11502	0.0228655	Up
AT2G34720	NF-YA4	AT2G34720	1.11397	0.00227248	Up
AT3G01430	AT3G01430	AT3G01430	1.1113	0.0457101	Up
AT3G11745	AT3G11745	AT3G11745	1.11126	0.00765316	Up
AT5G18255	AT5G18255	AT5G18255	1.11075	0.026353	Up
AT4G05530	IBR1	AT4G05530	1.1103	0.000375284	Up
AT4G18530	AT4G18530	AT4G18530	1.10967	0.00745384	Up
AT5G49645	AT5G49645	AT5G49645	1.10856	0.0355915	Up
AT3G23920	BAM1 AT3G23920	AT3G23920	1.10781	0.0204084	Up
AT3G59140	ABCC10	AT3G59140	1.10753	0.00313722	Up
AT2G46100	AT2G46100	AT2G46100	1.10671	0.0466798	Up
AT5G60360	ALP	AT5G60360	1.10574	0.03868	Up
AT2G31130	AT2G31130	AT2G31130	1.10551	0.0478618	Up
AT4G29210	GGT4	AT4G29210	1.10473	0.00341591	Up
AT2G41440	AT2G41440	AT2G41440	1.10433	0.0407321	Up
AT1G24880	LpxC2	AT1G24880	1.103	1.95e-06	Up
AT2G41475	AT2G41475	AT2G41475	1.10235	0.00106334	Up
AT4G14615	AT4G14615	AT4G14615	1.10173	1.07e-05	Up
AT5G55860	AT5G55860	AT5G55860	1.10063	0.0244471	Up
AT1G72190	AT1G72190	AT1G72190	1.09993	0.0310454	Up
AT2G25650	AT2G25650	AT2G25650	1.09882	0.00394735	Up
AT4G00520	AT4G00520	AT4G00520	1.09703	0.000902814	Up
AT1G08600	ATRX	AT1G08600	1.0967	0.00588643	Up
AT4G35530	AT4G35530	AT4G35530	1.09572	0.000906977	Up
AT5G08500	AT5G08500	AT5G08500	1.09393	0.000981706	Up
AT2G07708	AT2G07708	AT2G07708	1.09388	0.0031754	Up
AT3G22380	TIC	AT3G22380	1.09387	0.00177549	Up
AT1G21580	AT1G21580	AT1G21580	1.09296	0.000298585	Up
AT5G03630	ATMDAR2	AT5G03630	1.09287	0.0165504	Up
AT2G45630	AT2G45630	AT2G45630	1.09134	0.0002158	Up
AT5G15025	AT5G15025	AT5G15025	1.09096	0.0060377	Up
AT1G51170	UCN	AT1G51170	1.09063	0.0250841	Up
AT4G08590	ORTHL	AT4G08590	1.09024	0.037245	Up
AT5G05090	AT5G05090	AT5G05090	1.09	0.0103822	Up
AT2G33500	BBX12	AT2G33500	1.08967	0.0014999	Up
AT5G41560	AT5G41560	AT5G41560	1.08952	0.00206888	Up
AT2G41900	OXS2	AT2G41900	1.0894	6.94e-05	Up
AT5G06210	AT5G06210	AT5G06210	1.08827	0.0102904	Up
AT1G73980	AT1G73980	AT1G73980	1.08803	0.0131802	Up
AT2G40970	MYBC1	AT2G40970	1.08343	0.0188903	Up
AT5G13565	AT5G13565	AT5G13565	1.08253	0.00539166	Up
AT1G04537	AT1G04537	AT1G04537	1.08253	0.000797677	Up
AT1G06110	SKIP16	AT1G06110	1.08235	0.00312402	Up
AT1G31258	AT1G31258	AT1G31258	1.08219	0.0014856	Up
AT1G69640	SBH1	AT1G69640	1.08195	0.00323542	Up
AT1G78610	MSL6	AT1G78610	1.08147	0.0158465	Up
AT1G50290	AT1G50290	AT1G50290	1.08146	0.0298016	Up
AT4G32270	AT4G32270	AT4G32270	1.08103	0.000373616	Up
AT3G17626	AT3G17626	AT3G17626	1.08069	0.00406489	Up
AT3G20362	AT3G20362	AT3G20362	1.08066	0.0140205	Up
AT5G60580	AT5G60580	AT5G60580	1.08042	0.00907334	Up
AT5G20620	UBQ4	AT5G20620	1.0797	0.000728276	Up
AT2G39675	TAS1C	AT2G39675	1.07962	0.0386725	Up
AT5G13740	ZIF1	AT5G13740	1.07645	0.00629846	Up
AT5G10030	TGA4	AT5G10030	1.07625	0.0255045	Up
AT3G12630	SAP5	AT3G12630	1.076	0.00109879	Up
AT2G27960	CKS1	AT2G27960	1.07583	0.0022661	Up
AT5G35460	AT5G35460	AT5G35460	1.07525	0.00259665	Up
AT3G52105	AT3G52105	AT3G52105	1.07449	0.00140963	Up
AT5G20165	AT5G20165	AT5G20165	1.07395	0.000665018	Up
AT5G65990	AT5G65990	AT5G65990	1.07225	0.00218037	Up
AT4G01550	NAC069	AT4G01550	1.07171	0.0227615	Up
AT1G77600	AT1G77600	AT1G77600	1.06861	0.00289647	Up
AT4G16765	AT4G16765	AT4G16765	1.06786	0.00523087	Up
AT4G01593	AT4G01593	AT4G01593	1.06746	0.000908179	Up
AT4G08580	AT4G08580	AT4G08580	1.0663	0.00437323	Up
AT5G12200	PYD2	AT5G12200	1.06406	0.0207871	Up
AT2G23348	AT2G23348	AT2G23348	1.06322	0.0437421	Up
AT3G27560	ATN1	AT3G27560	1.06296	0.0113682	Up
AT4G13520	SMAP1	AT4G13520	1.06217	0.00439547	Up
AT2G14878	AT2G14878	AT2G14878	1.06081	0.0499245	Up
AT5G12190	AT5G12190	AT5G12190	1.06061	0.000176785	Up
AT5G65840	AT5G65840	AT5G65840	1.0606	0.00725177	Up
AT5G30495	AT5G30495	AT5G30495	1.06028	0.022255	Up
AT1G76185	AT1G76185	AT1G76185	1.05716	0.0034198	Up
AT3G52420	OEP7	AT3G52420	1.05573	1.49e-06	Up
AT4G18400	AT4G18400	AT4G18400	1.05539	0.00247652	Up
AT5G19030	AT5G19030	AT5G19030	1.0549	0.000708186	Up
AT2G25720	AT2G25720	AT2G25720	1.05425	3.67e-06	Up
AT1G07990	AT1G07990	AT1G07990	1.05239	0.00111367	Up
AT3G60400	SHOT1	AT3G60400	1.05167	0.015755	Up
AT5G62090	SLK2	AT5G62090	1.0514	0.000487097	Up
AT1G52347	AT1G52347	AT1G52347	1.05109	0.0088531	Up
AT3G02190	AT3G02190	AT3G02190	1.05101	1.68e-05	Up
AT5G09920	NRPB4	AT5G09920	1.04718	6.63e-05	Up
AT4G14548	AT4G14548	AT4G14548	1.04718	0.00545565	Up
AT1G17450	AT1G17450	AT1G17450	1.04636	0.0492742	Up
AT1G26920	AT1G26920	AT1G26920	1.04268	0.00366871	Up
AT4G08540	AT4G08540	AT4G08540	1.04229	0.00141142	Up
AT5G23760	AT5G23760	AT5G23760	1.04198	0.0162314	Up
AT1G48540	AT1G48540	AT1G48540	1.03999	0.00317121	Up
AT3G16175	AT3G16175	AT3G16175	1.03939	0.00677241	Up
AT5G14530	AT5G14530	AT5G14530	1.03931	0.0135867	Up
AT1G17490	AT1G17490	AT1G17490	1.03865	0.0168939	Up
AT3G11880	AT3G11880	AT3G11880	1.03784	0.0164767	Up
AT3G26380	AT3G26380	AT3G26380	1.03647	0.00109621	Up
AT3G26612	AT3G26612	AT3G26612	1.03609	0.013815	Up
AT1G78100	AUF1	AT1G78100	1.0354	0.00605929	Up
AT1G06800	PLA-I{gamma}1	AT1G06800	1.0328	0.000874708	Up
AT2G45380	AT2G45380	AT2G45380	1.03244	0.000285575	Up
AT1G35190	AT1G35190	AT1G35190	1.0321	0.0389059	Up
ATCG00470	atpE	ATCG00470	1.03069	0.0244891	Up
AT4G34280	AT4G34280	AT4G34280	1.02995	0.000114283	Up
AT2G06005	FIP1 AT2G06005	AT2G06005	1.02972	0.0130613	Up
AT2G36390	SBE2.1	AT2G36390	1.02868	0.0123084	Up
AT2G27285	AT2G27285	AT2G27285	1.02868	0.000441541	Up
AT5G03180	AT5G03180	AT5G03180	1.02866	0.00469937	Up
AT2G38800	AT2G38800	AT2G38800	1.02677	0.0196435	Up
AT1G04625	AT1G04625	AT1G04625	1.02668	0.0076279	Up
AT4G14520	AT4G14520	AT4G14520	1.02664	0.0139353	Up
AT3G27820	MDAR4	AT3G27820	1.02606	0.00175354	Up
AT1G31170	SRX	AT1G31170	1.02592	0.000776268	Up
AT5G63500	AT5G63500	AT5G63500	1.02565	0.0034198	Up
AT1G77710	CCP2	AT1G77710	1.02489	0.00283768	Up
AT3G62190	AT3G62190	AT3G62190	1.02479	3.43e-05	Up
AT4G00930	CIP4.1	AT4G00930	1.02286	0.0101088	Up
AT1G07170	AT1G07170	AT1G07170	1.02118	0.000854588	Up
AT2G28230	AT2G28230	AT2G28230	1.02064	7.16e-05	Up
AT1G29400	ML5	AT1G29400	1.01953	0.0234901	Up
AT3G10410	SCPL49	AT3G10410	1.01851	0.00208968	Up
AT5G62900	AT5G62900	AT5G62900	1.01832	0.00295403	Up
AT3G47960	GTR1	AT3G47960	1.0179	0.0491674	Up
AT5G20520	WAV2	AT5G20520	1.01742	9.94e-05	Up
AT5G55660	AT5G55660	AT5G55660	1.01592	2.8e-07	Up
AT3G27220	AT3G27220	AT3G27220	1.0158	0.0275986	Up
AT3G48690	CXE12	AT3G48690	1.01578	0.00878474	Up
AT1G73170	AT1G73170	AT1G73170	1.01508	0.000165614	Up
AT1G04555	AT1G04555	AT1G04555	1.01475	0.0377302	Up
AT5G52880	AT5G52880	AT5G52880	1.01343	0.00183509	Up
AT3G56690	CIP111	AT3G56690	1.01062	0.011981	Up
ATCG01050	ATCG01050	ATCG01050	1.00808	0.0316218	Up
AT2G46735	AT2G46735	AT2G46735	1.00756	0.00080507	Up
AT3G19000	AT3G19000	AT3G19000	1.00667	0.0256782	Up
AT2G21830	AT2G21830	AT2G21830	1.00604	0.0171478	Up
AT1G01500	AT1G01500	AT1G01500	1.00533	0.0213593	Up
AT1G56612	AT1G56612	AT1G56612	1.00527	0.0288943	Up
AT5G44410	AT5G44410	AT5G44410	1.00393	0.00135039	Up
AT4G39300	AT4G39300	AT4G39300	1.00237	0.0105032	Up
AT3G61220	SDR1	AT3G61220	1.00231	0.0124617	Up
AT2G41460	ARP	AT2G41460	1.00215	0.0307873	Up
AT1G08180	AT1G08180	AT1G08180	1.00039	0.0443319	Up
AT5G62130	AT5G62130	AT5G62130	1.0003	0.0402823	Up
AT4G24310	AT4G24310	AT4G24310	-32.2936	1.05e-41	Down
AT3G09545	AT3G09545	AT3G09545	-24.4485	2.41e-06	Down
AT5G11140	AT5G11140	AT5G11140	-22.2806	8.28e-20	Down
AT4G22490	AT4G22490	AT4G22490	-22.2014	1.54e-10	Down
AT2G35980	YLS9	AT2G35980	-18.8961	2.87e-22	Down
AT1G67260	TCP1	AT1G67260	-8.33226	2.79e-06	Down
AT1G56240	PP2-B13	AT1G56240	-8.2901	7.65e-05	Down
AT3G48360	BT2	AT3G48360	-8.05045	2.09e-05	Down
AT4G36850	AT4G36850	AT4G36850	-7.62171	7.75e-05	Down
AT1G21120	IGMT2	AT1G21120	-7.14352	0.000104417	Down
AT3G58780	SHP1	AT3G58780	-6.90666	6.13e-06	Down
AT1G16130	WAKL2	AT1G16130	-6.49996	0.000877499	Down
AT5G25190	ESE3	AT5G25190	-6.49588	3.69e-14	Down
AT3G18550	BRC1	AT3G18550	-6.48153	0.000890252	Down
AT5G62730	AT5G62730	AT5G62730	-6.40366	3.73e-05	Down
AT4G11470	CRK31	AT4G11470	-6.31768	0.00850505	Down
AT4G12470	AZI1	AT4G12470	-6.25488	0.0103699	Down
AT1G10550	XTH33	AT1G10550	-6.22915	0.00120035	Down
AT3G18010	WOX1	AT3G18010	-6.15648	0.00111367	Down
AT3G16670	AT3G16670	AT3G16670	-6.13857	0.000953592	Down
AT5G20630	GER3	AT5G20630	-6.06574	0.000795026	Down
AT1G62440	LRX2	AT1G62440	-6.06074	0.00149628	Down
AT3G13790	ATBFRUCT1	AT3G13790	-6.03426	6.98e-07	Down
AT1G06080	ADS1 AT1G06080	AT1G06080	-6.03047	0.0161358	Down
AT3G57240	BG3	AT3G57240	-6.01849	0.00181547	Down
AT5G03355	AT5G03355	AT5G03355	-5.96949	0.000693335	Down
AT3G12910	AT3G12910	AT3G12910	-5.94785	0.0202817	Down
AT4G14450	AT4G14450	AT4G14450	-5.9422	0.000586418	Down
AT4G02330	ATPMEPCRB	AT4G02330	-5.91978	2.29e-10	Down
AT3G26830	PAD3	AT3G26830	-5.88791	0.0104739	Down
AT1G53830	PME2	AT1G53830	-5.86392	0.00237692	Down
AT1G75030	TLP-3	AT1G75030	-5.82809	0.000139237	Down
AT3G12220	scpl16	AT3G12220	-5.82006	0.00184855	Down
AT1G71890	SUC5	AT1G71890	-5.76909	0.00310363	Down
AT1G74890	ARR15	AT1G74890	-5.72796	3.52e-06	Down
AT4G03140	AT4G03140	AT4G03140	-5.71523	0.00334688	Down
AT3G49620	DIN11	AT3G49620	-5.71293	0.0130613	Down
AT3G14395	AT3G14395	AT3G14395	-5.70938	2.91e-05	Down
AT4G15680	AT4G15680	AT4G15680	-5.70818	0.000805	Down
AT4G13660	PRR2	AT4G13660	-5.69064	0.0015163	Down
AT4G25070	AT4G25070	AT4G25070	-5.66119	0.00508402	Down
AT3G23150	ETR2	AT3G23150	-5.55005	0.000912245	Down
AT1G77640	AT1G77640	AT1G77640	-5.53757	0.000112873	Down
AT1G15125	AT1G15125	AT1G15125	-5.51667	0.0018186	Down
AT1G50040	AT1G50040	AT1G50040	-5.4947	0.000204333	Down
AT1G30730	AT1G30730	AT1G30730	-5.46901	0.0139213	Down
AT4G33320	AT4G33320	AT4G33320	-5.45872	0.00295252	Down
AT4G11485	LCR11	AT4G11485	-5.40813	0.0202102	Down
AT5G44550	AT5G44550	AT5G44550	-5.39471	0.00269941	Down
AT1G51790	AT1G51790	AT1G51790	-5.3716	0.000564379	Down
AT2G34360	AT2G34360	AT2G34360	-5.30654	0.00162155	Down
AT5G44568	AT5G44568	AT5G44568	-5.26429	1.49e-07	Down
AT1G02360	AT1G02360	AT1G02360	-5.21995	0.000279004	Down
AT2G44790	UCC2	AT2G44790	-5.20579	0.00149592	Down
AT1G23205	AT1G23205	AT1G23205	-5.1928	6.1e-06	Down
AT1G51800	IOS1	AT1G51800	-5.18025	0.00680598	Down
AT5G15581	AT5G15581	AT5G15581	-5.16613	0.00294711	Down
AT1G52770	AT1G52770	AT1G52770	-5.16543	6.08e-05	Down
AT4G38410	AT4G38410	AT4G38410	-5.13189	0.0367403	Down
AT5G57220	CYP81F2	AT5G57220	-5.13018	0.000547345	Down
AT5G44020	AT5G44020	AT5G44020	-5.12625	2.49e-15	Down
AT4G24180	TLP1 AT4G24180	AT4G24180	-5.0925	0.00547853	Down
AT2G16660	AT2G16660	AT2G16660	-5.02214	2.73e-10	Down
AT3G01290	HIR2	AT3G01290	-5.01405	3.1e-06	Down
AT5G56320	EXPA14	AT5G56320	-5.00462	0.00334458	Down
AT4G35620	CYCB2;2	AT4G35620	-5.00077	0.00272876	Down
AT5G51465	AT5G51465	AT5G51465	-4.982	0.0165925	Down
AT2G23560	MES7	AT2G23560	-4.96377	0.000114283	Down
AT4G04745	AT4G04745	AT4G04745	-4.89353	3.45e-06	Down
AT5G14330	AT5G14330	AT5G14330	-4.79005	0.00501236	Down
AT5G55450	AT5G55450	AT5G55450	-4.77453	7.56e-05	Down
AT5G45670	AT5G45670	AT5G45670	-4.76847	0.0204798	Down
AT1G11070	AT1G11070	AT1G11070	-4.76249	0.0116493	Down
AT3G48640	AT3G48640	AT3G48640	-4.74371	0.00040831	Down
AT4G37240	AT4G37240	AT4G37240	-4.74155	1.11e-11	Down
AT5G44585	AT5G44585	AT5G44585	-4.71365	0.0169253	Down
AT3G05470	AT3G05470	AT3G05470	-4.67774	0.0359753	Down
AT1G35230	AGP5	AT1G35230	-4.66978	0.000124128	Down
AT2G26520	AT2G26520	AT2G26520	-4.66588	0.0157324	Down
AT3G58120	BZIP61	AT3G58120	-4.64044	2.24e-05	Down
AT4G08040	ACS11	AT4G08040	-4.62239	0.000234641	Down
AT1G70990	AT1G70990	AT1G70990	-4.61113	0.0137044	Down
AT1G04040	AT1G04040	AT1G04040	-4.60682	1.28e-09	Down
AT1G43310	AT1G43310	AT1G43310	-4.60456	0.0126153	Down
AT1G32780	AT1G32780	AT1G32780	-4.60199	0.00219065	Down
AT5G38310	AT5G38310	AT5G38310	-4.5901	0.0276676	Down
AT2G28140	AT2G28140	AT2G28140	-4.58442	0.00871696	Down
AT5G20250	DIN10	AT5G20250	-4.57037	2.91e-05	Down
AT3G50140	AT3G50140	AT3G50140	-4.56844	0.0266345	Down
AT1G02190	AT1G02190	AT1G02190	-4.55095	0.0160602	Down
AT3G63088	RTFL14	AT3G63088	-4.55067	0.0185497	Down
AT4G02290	GH9B13	AT4G02290	-4.54596	0.048333	Down
AT2G20142	AT2G20142	AT2G20142	-4.54587	0.00121049	Down
AT3G23230	TDR1	AT3G23230	-4.53804	0.0273189	Down
AT2G27402	AT2G27402	AT2G27402	-4.53092	7.57e-05	Down
AT1G75590	AT1G75590	AT1G75590	-4.51059	0.00422067	Down
AT2G36885	AT2G36885	AT2G36885	-4.50924	2.4e-06	Down
AT5G04700	AT5G04700	AT5G04700	-4.50444	0.00966228	Down
AT1G09083	AT1G09083	AT1G09083	-4.49826	0.0123345	Down
AT4G30610	BRS1	AT4G30610	-4.48845	0.000668729	Down
AT1G07050	AT1G07050	AT1G07050	-4.48808	0.00857054	Down
AT4G29740	CKX4	AT4G29740	-4.4642	1.14e-05	Down
AT1G05675	AT1G05675	AT1G05675	-4.45814	0.00792325	Down
AT1G65060	4CL3	AT1G65060	-4.44552	0.000843563	Down
AT2G28570	AT2G28570	AT2G28570	-4.43381	8.93e-07	Down
AT3G10660	CPK2	AT3G10660	-4.43059	0.00219065	Down
AT1G43605	AT1G43605	AT1G43605	-4.41988	0.0201726	Down
AT4G01730	AT4G01730	AT4G01730	-4.4042	0.0124617	Down
AT3G23510	AT3G23510	AT3G23510	-4.40195	0.00147865	Down
AT1G14880	PCR1	AT1G14880	-4.3971	0.00633656	Down
AT5G65970	MLO10	AT5G65970	-4.39482	0.0170821	Down
AT5G57550	XTH25	AT5G57550	-4.38648	0.00258905	Down
AT3G44900	CHX4	AT3G44900	-4.37778	0.0159036	Down
AT3G25880	AT3G25880	AT3G25880	-4.37712	0.0154455	Down
AT5G38865	AT5G38865	AT5G38865	-4.37628	0.0201623	Down
AT4G30290	XTH19	AT4G30290	-4.37539	1.85e-05	Down
AT4G18253	AT4G18253	AT4G18253	-4.37501	0.000680589	Down
AT1G11740	AT1G11740	AT1G11740	-4.37435	0.0128282	Down
AT1G72610	GER1 AT1G72610	AT1G72610	-4.36911	3.19e-11	Down
AT5G19120	AT5G19120	AT5G19120	-4.35034	6.79e-08	Down
AT3G15518	AT3G15518	AT3G15518	-4.35019	0.0170841	Down
AT4G03450	AT4G03450	AT4G03450	-4.34714	0.000375653	Down
AT2G37925	COPT4	AT2G37925	-4.31694	0.0136227	Down
AT2G02930	GSTF3	AT2G02930	-4.31431	0.0146034	Down
AT3G06100	NIP7;1	AT3G06100	-4.31385	0.0118851	Down
AT5G66390	AT5G66390	AT5G66390	-4.30918	0.0375252	Down
AT1G09297	AT1G09297	AT1G09297	-4.30783	0.0156547	Down
AT4G30090	AT4G30090	AT4G30090	-4.30485	0.0202851	Down
AT1G04540	AT1G04540	AT1G04540	-4.30304	0.0192504	Down
AT4G14970	AT4G14970	AT4G14970	-4.29313	0.0226363	Down
AT4G30640	AT4G30640	AT4G30640	-4.28374	0.0158072	Down
AT3G23730	XTH16	AT3G23730	-4.2814	7.84e-05	Down
AT4G06598	AT4G06598	AT4G06598	-4.28044	0.0124031	Down
AT4G39070	BZS1	AT4G39070	-4.27425	0.0292563	Down
AT4G11000	AT4G11000	AT4G11000	-4.27039	1.74e-05	Down
AT1G47760	AGL102	AT1G47760	-4.2506	0.0271932	Down
AT1G33930	AT1G33930	AT1G33930	-4.23527	0.012396	Down
AT1G44830	AT1G44830	AT1G44830	-4.22323	0.0102412	Down
AT1G78410	AT1G78410	AT1G78410	-4.20974	0.00434094	Down
AT4G22410	AT4G22410	AT4G22410	-4.19463	0.0107267	Down
AT5G17040	AT5G17040	AT5G17040	-4.19188	0.0368947	Down
AT1G63070	AT1G63070	AT1G63070	-4.16221	0.024553	Down
AT5G61490	AT5G61490	AT5G61490	-4.1606	0.0259012	Down
AT4G28190	ULT1	AT4G28190	-4.12409	4.28e-05	Down
AT1G75945	AT1G75945	AT1G75945	-4.11968	0.00151261	Down
AT2G32200	AT2G32200	AT2G32200	-4.11728	3.96e-05	Down
AT1G51405	AT1G51405	AT1G51405	-4.10711	0.0250203	Down
AT3G59930	AT3G59930	AT3G59930	-4.10286	0.0352939	Down
AT4G02850	AT4G02850	AT4G02850	-4.09162	0.000421189	Down
AT3G22142	AT3G22142	AT3G22142	-4.07644	0.00819754	Down
AT3G16530	AT3G16530	AT3G16530	-4.06824	1.5e-05	Down
AT4G28780	AT4G28780	AT4G28780	-4.06562	0.00540107	Down
AT2G18690	AT2G18690	AT2G18690	-4.0531	0.00164661	Down
AT1G57630	AT1G57630	AT1G57630	-4.03315	0.0227398	Down
AT4G23210	CRK13	AT4G23210	-4.02164	0.0418947	Down
AT1G68120	BPC3	AT1G68120	-4.01956	0.0370773	Down
AT4G27570	AT4G27570	AT4G27570	-4.01697	0.0269957	Down
AT3G60290	AT3G60290	AT3G60290	-4.00742	9.94e-06	Down
AT1G78990	AT1G78990	AT1G78990	-4.00129	0.0270865	Down
AT2G09165	AT2G09165	AT2G09165	-4.00002	0.0207186	Down
AT4G21850	MSRB9	AT4G21850	-3.99807	0.0109445	Down
AT5G10100	TPPI	AT5G10100	-3.98083	0.0380536	Down
AT5G25250	FLOT1	AT5G25250	-3.97012	0.000751404	Down
AT3G04300	AT3G04300	AT3G04300	-3.96218	0.0324414	Down
AT4G22010	sks4	AT4G22010	-3.95646	0.00016482	Down
AT4G23220	CRK14	AT4G23220	-3.95393	2.47e-05	Down
AT4G37290	AT4G37290	AT4G37290	-3.94612	0.0220942	Down
AT5G50915	AT5G50915	AT5G50915	-3.94426	1.05e-06	Down
AT1G27045	ATHB54	AT1G27045	-3.94218	0.03663	Down
AT3G52700	AT3G52700	AT3G52700	-3.942	0.0123345	Down
AT1G25450	KCS5	AT1G25450	-3.93606	8.07e-05	Down
AT3G06880	AT3G06880	AT3G06880	-3.9128	0.000354266	Down
AT2G04450	NUDT6	AT2G04450	-3.90563	0.00460335	Down
AT5G06570	AT5G06570	AT5G06570	-3.902	0.0454713	Down
AT2G14560	LURP1	AT2G14560	-3.89958	0.00505764	Down
AT2G10940	AT2G10940	AT2G10940	-3.89311	0.00203493	Down
AT5G49330	MYB111	AT5G49330	-3.87267	0.0459386	Down
AT5G16170	AT5G16170	AT5G16170	-3.87175	0.0294274	Down
AT3G51470	AT3G51470	AT3G51470	-3.86958	0.00031247	Down
AT1G62914	AT1G62914	AT1G62914	-3.85616	0.0403767	Down
AT5G65730	XTH6	AT5G65730	-3.85587	8.28e-05	Down
AT5G67411	AT5G67411	AT5G67411	-3.85565	0.0428567	Down
AT3G15630	AT3G15630	AT3G15630	-3.85091	1.23e-05	Down
AT5G42830	AT5G42830	AT5G42830	-3.8413	0.00264201	Down
AT5G22940	F8H	AT5G22940	-3.84002	0.0170988	Down
AT4G34790	AT4G34790	AT4G34790	-3.823	0.0250811	Down
AT4G39010	GH9B18	AT4G39010	-3.80044	0.00871484	Down
AT1G02930	GSTF6	AT1G02930	-3.80042	0.000459858	Down
AT4G34770	AT4G34770	AT4G34770	-3.79981	0.00408982	Down
AT3G14210	ESM1	AT3G14210	-3.7953	2.95e-07	Down
AT1G30100	NCED5	AT1G30100	-3.78815	0.00836479	Down
AT1G02920	GSTF7	AT1G02920	-3.78271	0.00371837	Down
AT2G37720	TBL15	AT2G37720	-3.78208	0.00104838	Down
AT5G03350	AT5G03350	AT5G03350	-3.77916	0.0103589	Down
AT5G35525	AT5G35525	AT5G35525	-3.77889	0.0176049	Down
AT1G11850	AT1G11850	AT1G11850	-3.77866	0.0284147	Down
AT4G14365	XBAT34	AT4G14365	-3.77642	3.36e-05	Down
AT2G08220	AT2G08220	AT2G08220	-3.76453	2.93e-05	Down
AT1G26200	AT1G26200	AT1G26200	-3.74327	0.0328727	Down
AT1G70270	AT1G70270	AT1G70270	-3.74287	0.0251922	Down
AT4G23810	WRKY53	AT4G23810	-3.73199	0.000167347	Down
AT4G02520	GSTF2	AT4G02520	-3.72468	2.73e-06	Down
AT4G15690	AT4G15690	AT4G15690	-3.71674	0.00203493	Down
AT4G17160	RABB1a	AT4G17160	-3.70049	0.0308952	Down
AT5G08150	SOB5	AT5G08150	-3.69042	0.0102033	Down
AT1G75750	GASA1	AT1G75750	-3.68442	0.000136354	Down
AT4G36105	AT4G36105	AT4G36105	-3.67455	0.00176159	Down
AT4G00970	CRK41	AT4G00970	-3.67302	2.07e-05	Down
AT1G26762	AT1G26762	AT1G26762	-3.65772	0.00991994	Down
AT1G35140	PHI-1	AT1G35140	-3.65183	0.000305832	Down
AT5G18430	AT5G18430	AT5G18430	-3.64397	0.0204798	Down
AT5G46871	AT5G46871	AT5G46871	-3.63824	0.00574869	Down
AT3G57160	AT3G57160	AT3G57160	-3.63364	0.0330454	Down
AT1G19940	GH9B5	AT1G19940	-3.63011	7.95e-05	Down
AT4G33270	CDC20.1	AT4G33270	-3.61299	0.0347574	Down
AT4G14400	ACD6	AT4G14400	-3.61131	1.46e-07	Down
AT1G55330	AGP21	AT1G55330	-3.60924	6.02e-05	Down
AT4G08950	EXO	AT4G08950	-3.60308	7.73e-06	Down
AT1G77760	NIA1	AT1G77760	-3.57944	2.29e-06	Down
AT2G18210	AT2G18210	AT2G18210	-3.57518	0.00151005	Down
AT3G16240	DELTA-TIP	AT3G16240	-3.56726	9.64e-08	Down
AT1G74670	GASA6	AT1G74670	-3.56595	0.00437323	Down
AT3G15356	AT3G15356	AT3G15356	-3.5562	0.000113273	Down
AT4G18205	AT4G18205	AT4G18205	-3.55038	3.64e-05	Down
AT4G31000	AT4G31000	AT4G31000	-3.54799	1.1e-07	Down
AT3G17680	AT3G17680	AT3G17680	-3.53411	0.0329771	Down
AT4G04540	CRK39	AT4G04540	-3.5302	0.00276073	Down
AT1G29660	AT1G29660	AT1G29660	-3.52891	1.86e-05	Down
AT4G14130	XTH15	AT4G14130	-3.52139	0.0280407	Down
AT2G01913	AT2G01913	AT2G01913	-3.52002	0.0273514	Down
AT3G25010	RLP41	AT3G25010	-3.47113	0.0112412	Down
AT1G53520	FAP3	AT1G53520	-3.46564	0.00493272	Down
AT5G66640	DAR3	AT5G66640	-3.45869	0.0218312	Down
AT2G04495	AT2G04495	AT2G04495	-3.44508	0.00650758	Down
AT3G47380	AT3G47380	AT3G47380	-3.43861	0.00878474	Down
AT5G53250	AGP22	AT5G53250	-3.4356	0.0159644	Down
AT4G13340	LRX3	AT4G13340	-3.42489	1.24e-10	Down
AT2G31730	AT2G31730	AT2G31730	-3.42458	4.48e-09	Down
AT3G25510	AT3G25510	AT3G25510	-3.42377	0.042636	Down
AT2G24600	AT2G24600	AT2G24600	-3.39251	0.000411655	Down
AT4G23820	AT4G23820	AT4G23820	-3.38678	1.62e-08	Down
AT1G58370	RXF12	AT1G58370	-3.38362	0.00447965	Down
AT5G59990	AT5G59990	AT5G59990	-3.3835	0.00137791	Down
AT4G23150	CRK7	AT4G23150	-3.38161	0.0352592	Down
AT2G32190	AT2G32190	AT2G32190	-3.37994	0.00288326	Down
AT5G57760	AT5G57760	AT5G57760	-3.3785	0.0171157	Down
AT2G25735	AT2G25735	AT2G25735	-3.37827	0.0067293	Down
AT1G67820	AT1G67820	AT1G67820	-3.37208	0.0272504	Down
AT1G26790	AT1G26790	AT1G26790	-3.37175	1.07e-05	Down
AT1G54385	AT1G54385	AT1G54385	-3.36694	0.0202851	Down
AT4G30280	XTH18	AT4G30280	-3.36248	0.0131169	Down
AT1G62380	ACO2 AT1G62380	AT1G62380	-3.36188	2.43e-11	Down
AT5G59650	AT5G59650	AT5G59650	-3.36161	0.0254739	Down
AT5G05300	AT5G05300	AT5G05300	-3.35311	0.0218347	Down
AT1G09750	AT1G09750	AT1G09750	-3.34922	0.000717007	Down
AT3G57700	AT3G57700	AT3G57700	-3.34436	0.00549294	Down
AT1G60590	AT1G60590	AT1G60590	-3.34143	0.0129582	Down
AT4G23060	IQD22	AT4G23060	-3.34	5.54e-07	Down
AT1G11545	XTH8	AT1G11545	-3.33339	0.0020371	Down
AT1G04360	AT1G04360	AT1G04360	-3.31089	0.000685763	Down
AT1G28010	ABCB14	AT1G28010	-3.30087	0.000399069	Down
ATMG00370	ATMG00370	ATMG00370	-3.29934	0.0267654	Down
AT2G41090	AT2G41090	AT2G41090	-3.29736	1.86e-06	Down
AT5G40230	UMAMIT37	AT5G40230	-3.29511	0.0106004	Down
AT5G45000	AT5G45000	AT5G45000	-3.29429	0.0160183	Down
AT2G35710	PGSIP7	AT2G35710	-3.29211	0.000600912	Down
AT5G50335	AT5G50335	AT5G50335	-3.27599	0.0156501	Down
AT5G26690	AT5G26690	AT5G26690	-3.2707	0.0322921	Down
AT3G25100	CDC45	AT3G25100	-3.26107	0.0302655	Down
AT3G22930	CML11	AT3G22930	-3.25983	0.00091877	Down
AT5G61412	AT5G61412	AT5G61412	-3.22918	0.037245	Down
AT2G34940	VSR5	AT2G34940	-3.2283	0.0132591	Down
AT2G20750	EXPB1	AT2G20750	-3.20986	0.0324028	Down
AT2G40100	LHCB4.3	AT2G40100	-3.20189	2.5e-06	Down
AT2G30010	TBL45	AT2G30010	-3.19724	0.000834354	Down
AT4G04570	CRK40	AT4G04570	-3.18775	2.15e-07	Down
AT2G28630	KCS12	AT2G28630	-3.1668	0.000934611	Down
AT1G48210	AT1G48210	AT1G48210	-3.15796	0.000292353	Down
AT1G13470	AT1G13470	AT1G13470	-3.14511	0.00878648	Down
AT1G21910	DREB26	AT1G21910	-3.14479	0.000913029	Down
AT1G09932	AT1G09932	AT1G09932	-3.1423	0.0114294	Down
AT3G48720	DCF	AT3G48720	-3.14169	3.81e-05	Down
AT1G26770	EXPA10	AT1G26770	-3.13729	0.00312402	Down
AT3G60840	MAP65-4	AT3G60840	-3.12986	0.0324028	Down
AT2G15090	KCS8	AT2G15090	-3.12705	0.0123116	Down
AT2G16270	AT2G16270	AT2G16270	-3.12641	0.0106301	Down
AT3G51330	AT3G51330	AT3G51330	-3.11784	0.00580198	Down
AT3G56790	AT3G56790	AT3G56790	-3.11683	0.0383012	Down
AT3G23120	RLP38	AT3G23120	-3.11404	0.000926251	Down
AT4G14690	ELIP2	AT4G14690	-3.11023	0.00439746	Down
AT1G56060	AT1G56060	AT1G56060	-3.10958	0.0137857	Down
AT3G12110	ACT11	AT3G12110	-3.10448	6.14e-05	Down
AT3G24420	AT3G24420	AT3G24420	-3.10395	2.24e-05	Down
AT5G60800	AT5G60800	AT5G60800	-3.09696	0.00120035	Down
AT1G15570	CYCA2;3	AT1G15570	-3.09665	0.0287599	Down
AT3G15450	AT3G15450	AT3G15450	-3.0926	0.00568778	Down
AT1G58420	AT1G58420	AT1G58420	-3.09209	0.0013944	Down
AT4G36030	ARO3	AT4G36030	-3.08187	0.00201034	Down
AT4G16980	AT4G16980	AT4G16980	-3.07584	1.27e-06	Down
AT4G25810	XTR6	AT4G25810	-3.07343	0.0149139	Down
AT5G08640	FLS1	AT5G08640	-3.07225	0.0205879	Down
AT2G40670	RR16	AT2G40670	-3.0691	4e-05	Down
AT4G38400	EXLA2	AT4G38400	-3.05891	0.00157729	Down
AT2G20670	AT2G20670	AT2G20670	-3.05858	7.12e-05	Down
AT2G06850	XTH4	AT2G06850	-3.05852	0.000112873	Down
AT5G46330	FLS2 AT5G46330	AT5G46330	-3.05515	0.000335128	Down
AT3G56400	WRKY70	AT3G56400	-3.05153	0.00111367	Down
AT2G23130	AGP17	AT2G23130	-3.0508	9.59e-06	Down
AT4G18970	AT4G18970	AT4G18970	-3.04393	0.0187823	Down
AT1G11330	AT1G11330	AT1G11330	-3.04218	5.42e-07	Down
AT4G23140	CRK6	AT4G23140	-3.04036	0.00736237	Down
AT2G16060	HB1	AT2G16060	-3.0343	0.00344576	Down
AT2G32680	RLP23	AT2G32680	-3.03057	0.00387136	Down
AT4G13410	ATCSLA15	AT4G13410	-3.02471	0.00490603	Down
AT1G72730	AT1G72730	AT1G72730	-3.02341	9.3e-07	Down
AT3G05730	AT3G05730	AT3G05730	-3.02302	0.0499228	Down
AT2G21220	AT2G21220	AT2G21220	-3.01722	0.00591425	Down
AT1G55335	AT1G55335	AT1G55335	-3.01065	0.00169172	Down
AT1G22530	PATL2	AT1G22530	-3.00798	1.32e-08	Down
AT2G22810	ACS4	AT2G22810	-3.00792	0.0213593	Down
AT1G80280	AT1G80280	AT1G80280	-3.00637	0.00637845	Down
AT1G62350	AT1G62350	AT1G62350	-3.00555	0.0188302	Down
AT3G62780	AT3G62780	AT3G62780	-3.00281	0.00876526	Down
AT4G31440	AT4G31440	AT4G31440	-2.99698	0.0220942	Down
AT2G17230	EXL5	AT2G17230	-2.99651	1.84e-06	Down
AT1G10340	AT1G10340	AT1G10340	-2.99555	0.00682126	Down
AT5G02540	AT5G02540	AT5G02540	-2.99507	0.0110178	Down
AT5G64620	C/VIF2	AT5G64620	-2.98758	1.69e-05	Down
AT4G11890	ARCK1	AT4G11890	-2.98676	0.0104412	Down
AT3G50470	HR3	AT3G50470	-2.98348	0.000960359	Down
AT3G22235	AT3G22235	AT3G22235	-2.98334	0.00606711	Down
AT5G06330	AT5G06330	AT5G06330	-2.98328	0.000116508	Down
AT5G52882	AT5G52882	AT5G52882	-2.98131	1.95e-06	Down
AT1G72600	AT1G72600	AT1G72600	-2.97382	9.71e-13	Down
AT4G17240	AT4G17240	AT4G17240	-2.96238	0.00309744	Down
AT5G36910	THI2.2	AT5G36910	-2.9607	0.0285977	Down
AT2G24850	TAT3	AT2G24850	-2.95372	0.0158851	Down
AT1G04520	PDLP2	AT1G04520	-2.95293	0.000372604	Down
AT2G47750	GH3.9	AT2G47750	-2.9527	0.00439547	Down
AT2G36050	OFP15	AT2G36050	-2.94554	0.000800453	Down
AT3G48080	AT3G48080	AT3G48080	-2.94279	0.00455265	Down
AT4G24140	AT4G24140	AT4G24140	-2.9363	0.0477116	Down
AT3G50480	HR4	AT3G50480	-2.92359	0.000912245	Down
AT2G18010	AT2G18010	AT2G18010	-2.91319	0.0134125	Down
AT5G39670	AT5G39670	AT5G39670	-2.90807	0.0104348	Down
AT2G21650	MEE3	AT2G21650	-2.90683	0.000209359	Down
AT5G56720	c-NAD-MDH3	AT5G56720	-2.90251	0.0389456	Down
AT2G18700	TPS11	AT2G18700	-2.89438	0.000257251	Down
AT3G07010	AT3G07010	AT3G07010	-2.89345	8.74e-07	Down
AT5G56870	BGAL4	AT5G56870	-2.88497	0.0321156	Down
AT3G53232	RTFL1	AT3G53232	-2.8822	0.00106738	Down
AT1G03010	AT1G03010	AT1G03010	-2.88081	0.0288773	Down
AT4G14770	TCX2	AT4G14770	-2.87876	0.0159583	Down
AT1G07570	APK1A	AT1G07570	-2.87018	1.23e-08	Down
AT2G16630	AT2G16630	AT2G16630	-2.86481	0.0203225	Down
AT1G66465	AT1G66465	AT1G66465	-2.86193	0.0469	Down
AT3G10720	AT3G10720	AT3G10720	-2.85222	0.000152189	Down
AT4G33360	FLDH	AT4G33360	-2.85122	8.23e-07	Down
AT5G05860	UGT76C2	AT5G05860	-2.85117	1.07e-06	Down
AT2G21540	SFH3	AT2G21540	-2.84977	0.00022672	Down
AT1G57990	PUP18	AT1G57990	-2.84649	0.0271932	Down
AT3G16620	TOC120	AT3G16620	-2.84508	0.000313389	Down
AT2G42870	PAR1	AT2G42870	-2.83665	0.026383	Down
AT1G69530	EXPA1	AT1G69530	-2.83517	0.000688181	Down
AT5G47330	AT5G47330	AT5G47330	-2.83387	0.019804	Down
AT4G32460	AT4G32460	AT4G32460	-2.83235	0.00455237	Down
AT2G44740	CYCP4;1	AT2G44740	-2.82782	0.00158182	Down
AT1G05835	AT1G05835	AT1G05835	-2.82717	0.0380525	Down
AT5G41750	AT5G41750	AT5G41750	-2.82612	0.0132327	Down
AT5G54510	DFL1	AT5G54510	-2.82411	0.00945711	Down
AT2G28190	CSD2	AT2G28190	-2.82025	0.000785903	Down
ATCG00750	rps11	ATCG00750	-2.81811	2.48e-22	Down
AT2G41100	TCH3	AT2G41100	-2.81558	0.00739053	Down
AT1G66940	AT1G66940	AT1G66940	-2.80772	0.00499143	Down
AT5G36925	AT5G36925	AT5G36925	-2.80605	0.0254876	Down
AT5G03552	ath-MIR822	AT5G03552	-2.80426	0.00532495	Down
AT2G25270	AT2G25270	AT2G25270	-2.80421	0.0198786	Down
AT5G47910	RBOHD	AT5G47910	-2.79744	1.46e-06	Down
AT2G40300	FER4	AT2G40300	-2.79714	1.03e-05	Down
AT2G37025	TRFL8	AT2G37025	-2.79607	0.00379598	Down
AT3G49940	LBD38	AT3G49940	-2.79332	5.58e-06	Down
AT3G47860	CHL	AT3G47860	-2.79064	7.54e-06	Down
AT4G26690	SHV3	AT4G26690	-2.79046	1.39e-09	Down
AT5G52760	AT5G52760	AT5G52760	-2.78759	0.0264037	Down
AT4G10955	AT4G10955	AT4G10955	-2.78746	0.00258905	Down
AT5G46880	HB-7 AT5G46880	AT5G46880	-2.78488	0.0189509	Down
AT4G01720	WRKY47	AT4G01720	-2.7819	0.000161203	Down
AT1G35170	AT1G35170	AT1G35170	-2.77929	0.0417622	Down
AT4G04700	CPK27	AT4G04700	-2.77748	0.00390636	Down
AT3G45970	EXLA1	AT3G45970	-2.77445	0.00658931	Down
AT3G22120	CWLP	AT3G22120	-2.77432	0.00511822	Down
AT2G41080	AT2G41080	AT2G41080	-2.77177	0.00709437	Down
AT1G10020	AT1G10020	AT1G10020	-2.76853	8.45e-07	Down
AT4G12420	SKU5	AT4G12420	-2.76703	4.08e-05	Down
AT4G29310	AT4G29310	AT4G29310	-2.76262	6.24e-05	Down
AT3G24450	AT3G24450	AT3G24450	-2.75791	0.0167542	Down
AT3G50570	AT3G50570	AT3G50570	-2.75509	0.0253155	Down
AT3G14310	PME3	AT3G14310	-2.75152	5.19e-06	Down
AT5G26670	AT5G26670	AT5G26670	-2.74983	0.0404795	Down
AT1G63260	TET10	AT1G63260	-2.7456	9.71e-08	Down
AT5G01340	mSFC1	AT5G01340	-2.73463	1.24e-06	Down
AT5G56840	AT5G56840	AT5G56840	-2.73375	0.0215121	Down
AT2G02950	PKS1	AT2G02950	-2.73205	9.72e-05	Down
AT5G54380	THE1	AT5G54380	-2.72343	3.67e-06	Down
AT2G16750	AT2G16750	AT2G16750	-2.72329	0.000846809	Down
AT1G06830	AT1G06830	AT1G06830	-2.72023	0.00234967	Down
AT3G56090	FER3	AT3G56090	-2.71378	2.37e-05	Down
AT3G48100	RR5	AT3G48100	-2.71199	5.21e-05	Down
AT3G06080	TBL10	AT3G06080	-2.70743	4.97e-08	Down
AT4G02100	AT4G02100	AT4G02100	-2.70684	0.000331439	Down
AT1G26600	CLE9	AT1G26600	-2.70537	0.00942736	Down
AT1G48480	RKL1	AT1G48480	-2.7051	0.00654955	Down
AT5G25460	DGR2	AT5G25460	-2.70402	0.0054455	Down
AT3G04210	AT3G04210	AT3G04210	-2.69878	0.00168578	Down
AT1G27460	NPGR1	AT1G27460	-2.69841	0.00086606	Down
AT1G03870	FLA9	AT1G03870	-2.69312	9.68e-07	Down
AT2G36590	ProT3	AT2G36590	-2.69248	0.00194374	Down
AT4G15700	AT4G15700	AT4G15700	-2.69091	0.0101867	Down
AT1G30900	VSR6	AT1G30900	-2.6862	0.00796883	Down
AT1G05630	5PTASE13	AT1G05630	-2.68596	1.31e-05	Down
AT2G18890	AT2G18890	AT2G18890	-2.68506	0.000934611	Down
AT5G25440	AT5G25440	AT5G25440	-2.67756	1.36e-06	Down
AT2G47130	SDR3	AT2G47130	-2.67745	0.0229455	Down
AT2G34430	LHB1B1	AT2G34430	-2.67527	4.05e-05	Down
AT4G38950	AT4G38950	AT4G38950	-2.66931	0.0100224	Down
AT3G50560	AT3G50560	AT3G50560	-2.66647	7.03e-08	Down
AT4G23190	CRK11	AT4G23190	-2.66282	0.0425827	Down
AT1G57560	MYB50	AT1G57560	-2.66204	0.0142578	Down
AT5G27920	AT5G27920	AT5G27920	-2.65524	0.00247387	Down
AT1G33811	AT1G33811	AT1G33811	-2.65296	0.00338097	Down
AT5G22920	AT5G22920	AT5G22920	-2.64546	9.96e-05	Down
AT1G69890	AT1G69890	AT1G69890	-2.64507	0.0394491	Down
AT4G23230	CRK15	AT4G23230	-2.64467	0.014283	Down
AT5G65390	AGP7	AT5G65390	-2.64457	0.00253706	Down
AT5G15530	BCCP2	AT5G15530	-2.64442	0.0430355	Down
AT2G19170	SLP3	AT2G19170	-2.64284	0.0284171	Down
AT5G60950	COBL5	AT5G60950	-2.63719	9.96e-05	Down
AT1G19450	AT1G19450	AT1G19450	-2.62956	3.1e-06	Down
AT5G62170	TRM25	AT5G62170	-2.62051	0.0212986	Down
AT3G52520	AT3G52520	AT3G52520	-2.60776	0.00197731	Down
AT3G22231	PCC1	AT3G22231	-2.60744	0.0369942	Down
AT1G49730	AT1G49730	AT1G49730	-2.6074	0.000623292	Down
AT1G33610	AT1G33610	AT1G33610	-2.60438	0.000289508	Down
AT2G26440	AT2G26440	AT2G26440	-2.60282	0.0110205	Down
AT1G14205	AT1G14205	AT1G14205	-2.60276	0.0132571	Down
AT3G02550	LBD41	AT3G02550	-2.59944	0.00338097	Down
AT5G47920	AT5G47920	AT5G47920	-2.59866	0.0388732	Down
AT1G77765	AT1G77765	AT1G77765	-2.59279	0.0248575	Down
AT5G25930	AT5G25930	AT5G25930	-2.58023	0.0403365	Down
AT1G23090	AST91	AT1G23090	-2.57991	1.02e-10	Down
AT1G27060	AT1G27060	AT1G27060	-2.57911	0.00025254	Down
AT1G03457	AT1G03457	AT1G03457	-2.57896	0.0160819	Down
AT5G45490	AT5G45490	AT5G45490	-2.5709	4.5e-09	Down
AT4G35350	XCP1	AT4G35350	-2.56829	0.000966357	Down
AT2G47930	AGP26	AT2G47930	-2.56573	4.7e-05	Down
AT4G26220	AT4G26220	AT4G26220	-2.56438	0.0181527	Down
AT5G66920	sks17	AT5G66920	-2.55944	0.00247387	Down
AT3G06778	AT3G06778	AT3G06778	-2.55868	0.00560745	Down
AT5G18600	AT5G18600	AT5G18600	-2.55167	0.000135773	Down
AT2G40750	WRKY54	AT2G40750	-2.54244	0.0174461	Down
AT5G19840	AT5G19840	AT5G19840	-2.53478	0.0405135	Down
AT1G62480	AT1G62480	AT1G62480	-2.53446	0.000283681	Down
AT1G21240	WAK3	AT1G21240	-2.52344	0.0466798	Down
AT1G73805	SARD1	AT1G73805	-2.52315	0.0174298	Down
AT5G28630	AT5G28630	AT5G28630	-2.5216	0.00914478	Down
AT1G20930	CDKB2;2	AT1G20930	-2.5186	0.00355716	Down
AT1G25988	AT1G25988	AT1G25988	-2.51653	0.0160819	Down
AT4G34950	AT4G34950	AT4G34950	-2.5157	0.00130372	Down
AT3G11010	RLP34	AT3G11010	-2.51489	0.0195238	Down
AT5G05460	ENGase85A	AT5G05460	-2.51331	0.000981706	Down
AT4G30680	AT4G30680	AT4G30680	-2.50484	0.0376774	Down
AT4G14750	IQD19	AT4G14750	-2.49759	0.00199474	Down
AT3G22760	SOL1 AT3G22760	AT3G22760	-2.49754	0.00795239	Down
AT2G28950	EXPA6	AT2G28950	-2.49712	0.00302687	Down
AT3G18773	AT3G18773	AT3G18773	-2.49431	6.01e-05	Down
AT4G27450	AT4G27450	AT4G27450	-2.49279	0.00427758	Down
AT3G28910	MYB30	AT3G28910	-2.48917	2.73e-10	Down
AT2G15760	AT2G15760	AT2G15760	-2.48491	0.0124436	Down
AT1G52910	AT1G52910	AT1G52910	-2.48306	0.0431356	Down
AT1G35710	AT1G35710	AT1G35710	-2.48152	0.0104988	Down
AT1G73830	BEE3	AT1G73830	-2.48106	0.0160731	Down
AT1G08930	ERD6	AT1G08930	-2.47776	0.00294711	Down
AT1G76620	AT1G76620	AT1G76620	-2.47379	2.44e-05	Down
AT5G22930	AT5G22930	AT5G22930	-2.47102	0.0290296	Down
AT3G48187	AT3G48187	AT3G48187	-2.46483	0.0223455	Down
[truncated: 920 more rows]

## Sheet: atg5-1_vs_Col-0
User_ID	symbol	ensembl_ID	atg5Mock-Col0Mock_log2FC	atg5Mock-Col0Mock_adjPval	Direction
AT1G33730	CYP76C5	AT1G33730	16.5604	2.09e-07	Up
AT1G47395	AT1G47395	AT1G47395	9.87648	0.000173684	Up
AT2G01422	AT2G01422	AT2G01422	9.41147	1.98e-09	Up
AT4G01380	AT4G01380	AT4G01380	8.67523	4.25e-05	Up
AT4G01390	AT4G01390	AT4G01390	8.11017	0.000943977	Up
AT1G47400	AT1G47400	AT1G47400	7.97652	0.000402269	Up
AT2G30766	AT2G30766	AT2G30766	7.78739	1.84e-06	Up
AT2G14247	AT2G14247	AT2G14247	7.29602	0.0166046	Up
AT2G41240	BHLH100	AT2G41240	7.21509	0.025374	Up
AT3G56980	bHLH39	AT3G56980	6.84919	0.0329316	Up
AT5G05250	AT5G05250	AT5G05250	6.60452	6.87e-05	Up
AT1G04907	U1.10	AT1G04907	6.42582	7.41e-05	Up
AT5G12030	HSP17.6A	AT5G12030	6.00245	1.16e-05	Up
AT5G24240	AT5G24240	AT5G24240	5.90565	3.23e-08	Up
AT5G07745	AT5G07745	AT5G07745	5.72253	0.00182596	Up
AT3G28899	AT3G28899	AT3G28899	5.6444	9.41e-05	Up
ATCG00630	psaJ	ATCG00630	5.60596	1.29e-21	Up
AT4G27654	AT4G27654	AT4G27654	5.58248	5.27e-06	Up
AT5G38700	AT5G38700	AT5G38700	5.37672	0.0325759	Up
AT1G19210	AT1G19210	AT1G19210	5.20883	0.0250979	Up
ATCG01180	ATCG01180	ATCG01180	5.15784	3.21e-14	Up
ATCG00950	ATCG00950	ATCG00950	5.15763	3.21e-14	Up
AT1G04263	U5.6	AT1G04263	4.86155	0.00013122	Up
AT4G34410	RRTF1	AT4G34410	4.85842	0.0016419	Up
AT4G13820	AT4G13820	AT4G13820	4.72332	0.0235269	Up
AT5G02325	AT5G02325	AT5G02325	4.6877	0.00425267	Up
AT5G53048	AT5G53048	AT5G53048	4.63454	0.000900091	Up
AT1G07400	AT1G07400	AT1G07400	4.56298	3.13e-05	Up
ATCG00690	psbT	ATCG00690	4.53135	2.48e-09	Up
AT5G58180	ATYKT62	AT5G58180	4.52297	0.0422944	Up
AT2G17660	AT2G17660	AT2G17660	4.51924	0.000981963	Up
AT4G25100	FSD1	AT4G25100	4.38304	0.00804145	Up
AT1G06463	AT1G06463	AT1G06463	4.30388	1.97e-05	Up
AT1G07887	AT1G07887	AT1G07887	4.28504	0.0292223	Up
AT1G08115	U1.5	AT1G08115	4.26858	5.68e-09	Up
AT4G01360	BPS3	AT4G01360	4.24013	0.00398181	Up
ATCG01270	ycf15-A ATCG01270	ATCG01270	4.13024	3.35e-06	Up
ATCG00870	ycf15-A ATCG00870	ATCG00870	4.13024	3.35e-06	Up
AT1G08113	AT1G08113	AT1G08113	4.11235	0.0221621	Up
ATCG00320	ATCG00320	ATCG00320	4.11149	0.000241487	Up
AT5G12020	HSP17.6II	AT5G12020	3.96164	0.00983747	Up
AT2G26150	HSFA2	AT2G26150	3.93712	4.76e-05	Up
AT5G15022	AT5G15022	AT5G15022	3.93422	0.00154492	Up
AT3G20760	AT3G20760	AT3G20760	3.91238	0.000175388	Up
AT5G17350	AT5G17350	AT5G17350	3.88331	0.00334733	Up
AT4G36570	RL3	AT4G36570	3.88181	0.000227693	Up
AT5G61455	U2.7 AT5G61455	AT5G61455	3.84322	2.73e-06	Up
AT2G04405	AT2G04405	AT2G04405	3.81062	9.15e-05	Up
AT1G12610	DDF1	AT1G12610	3.77083	0.0346638	Up
AT4G25490	CBF1	AT4G25490	3.74724	0.00597776	Up
AT3G30720	QQS	AT3G30720	3.72654	3.16e-13	Up
ATMG00090	rps3 ATMG00090	ATMG00090	3.69318	2.74e-20	Up
ATCG01070	ndhE	ATCG01070	3.6439	5.02e-15	Up
AT5G04105	U1.4	AT5G04105	3.6276	0.000267575	Up
AT5G06845	AT5G06845	AT5G06845	3.60547	1.66e-08	Up
AT1G05273	U2.1	AT1G05273	3.58334	5.4e-11	Up
AT3G01715	U1.6	AT3G01715	3.5733	1.06e-09	Up
AT1G08643	AT1G08643	AT1G08643	3.55272	0.023355	Up
AT3G56825	U2.4 AT3G56825	AT3G56825	3.54822	1.01e-12	Up
AT3G51910	HSFA7A	AT3G51910	3.54627	4.3e-05	Up
AT3G01695	U1.7	AT3G01695	3.5311	3.2e-09	Up
AT5G65030	AT5G65030	AT5G65030	3.45859	0.015654	Up
AT2G06995	AT2G06995	AT2G06995	3.44005	0.000504258	Up
AT3G21530	AT3G21530	AT3G21530	3.43193	0.0405479	Up
AT1G59860	AT1G59860	AT1G59860	3.4231	0.00102833	Up
AT2G04435	AT2G04435	AT2G04435	3.41295	2.59e-05	Up
AT2G04455	U2.10b/12	AT2G04455	3.38735	6.17e-05	Up
AT5G41471	SNOR108	AT5G41471	3.36856	0.00257272	Up
AT4G08755	U6.5	AT4G08755	3.34765	4.39e-07	Up
AT1G20015	AT1G20015	AT1G20015	3.33813	0.0381922	Up
AT4G25470	CBF2	AT4G25470	3.31832	0.00459766	Up
AT1G74930	ORA47	AT1G74930	3.30738	0.0437182	Up
ATCG01120	rps15	ATCG01120	3.28825	3.57e-14	Up
AT3G57765	U2.3 AT3G57765	AT3G57765	3.28533	1.63e-08	Up
AT5G52740	AT5G52740	AT5G52740	3.26101	0.0421939	Up
AT5G09585	U2.5	AT5G09585	3.25178	1.98e-07	Up
AT2G29500	AT2G29500	AT2G29500	3.2156	0.0088819	Up
AT3G47640	PYE	AT3G47640	3.2122	2.54e-08	Up
AT5G22380	NAC090	AT5G22380	3.20433	0.00687854	Up
AT2G40330	PYL6	AT2G40330	3.17001	0.033269	Up
AT5G45630	AT5G45630	AT5G45630	3.14608	0.0354904	Up
ATCG00310	ATCG00310	ATCG00310	3.13676	4.96e-10	Up
ATMG00570	ATMG00570	ATMG00570	3.12955	6.12e-07	Up
ATCG01210	ATCG01210	ATCG01210	3.12612	0.0205396	Up
ATCG00920	ATCG00920	ATCG00920	3.12443	0.0206499	Up
AT3G02040	SRG3	AT3G02040	3.08867	0.0107472	Up
AT5G08820	AT5G08820	AT5G08820	3.05986	0.0218469	Up
AT1G70185	AT1G70185	AT1G70185	3.03815	0.00431502	Up
AT2G04375	U2.10	AT2G04375	3.01435	1.86e-05	Up
AT3G09350	Fes1A	AT3G09350	3.00546	3.51e-15	Up
AT1G76530	AT1G76530	AT1G76530	3.00408	0.0325154	Up
AT4G03915	AT4G03915	AT4G03915	2.97825	0.0299906	Up
AT5G48170	SLY2	AT5G48170	2.96782	0.034291	Up
ATCG00960	ATCG00960	ATCG00960	2.96568	1.84e-06	Up
AT4G05631	AT4G05631	AT4G05631	2.96381	4.25e-05	Up
ATCG01170	ATCG01170	ATCG01170	2.96328	1.84e-06	Up
AT1G06537	AT1G06537	AT1G06537	2.95577	8.28e-08	Up
AT1G56660	AT1G56660	AT1G56660	2.95464	0.000127589	Up
AT5G20790	AT5G20790	AT5G20790	2.94365	0.0339897	Up
ATCG00760	rpl36	ATCG00760	2.93393	5.2e-06	Up
AT1G74310	HSP101	AT1G74310	2.93375	5.18e-06	Up
AT2G35384	AT2G35384	AT2G35384	2.92639	0.02432	Up
AT3G06355	AT3G06355	AT3G06355	2.91726	2.44e-10	Up
ATCG00420	ndhJ	ATCG00420	2.91368	9.15e-07	Up
AT1G05057	U2.14	AT1G05057	2.91018	0.0163858	Up
ATCG01160	ATCG01160	ATCG01160	2.85378	2.94e-06	Up
ATCG00970	ATCG00970	ATCG00970	2.85378	2.94e-06	Up
AT4G13395	RTFL12	AT4G13395	2.84602	0.0426605	Up
AT4G12400	Hop3	AT4G12400	2.84562	3.35e-05	Up
AT4G27652	AT4G27652	AT4G27652	2.82579	0.00227741	Up
AT3G24500	MBF1C	AT3G24500	2.81313	3.19e-05	Up
AT1G04733	U2.11	AT1G04733	2.8113	1.27e-05	Up
AT5G54075	U3D	AT5G54075	2.79719	6.55e-07	Up
AT4G03905	AT4G03905	AT4G03905	2.79226	0.0142915	Up
AT3G17790	PAP17	AT3G17790	2.78398	0.00293184	Up
AT3G61198	AT3G61198	AT3G61198	2.76529	0.0120506	Up
AT4G27657	AT4G27657	AT4G27657	2.7609	3.13e-06	Up
AT1G06540	AT1G06540	AT1G06540	2.75338	0.0103984	Up
ATMG01190	atp1	ATMG01190	2.73914	2.22e-10	Up
AT2G01020	AT2G01020 AT2G01020	AT2G01020	2.7317	8.05e-09	Up
AT3G41979	AT2G01020 AT3G41979	AT3G41979	2.73153	8.98e-09	Up
ATCG00050	rps16	ATCG00050	2.71441	2.39e-13	Up
AT1G25097	AT1G25097	AT1G25097	2.71412	0.019701	Up
AT4G27360	AT4G27360	AT4G27360	2.68691	0.0120529	Up
AT4G03995	U2.9	AT4G03995	2.66278	0.00339583	Up
AT3G57645	U2.2	AT3G57645	2.65737	0.0103984	Up
AT5G27660	DEG14	AT5G27660	2.65605	8.8e-05	Up
AT2G20723	AT2G20723	AT2G20723	2.65336	0.0299906	Up
AT3G21710	AT3G21710	AT3G21710	2.64275	0.0128395	Up
AT4G06795	AT4G06795	AT4G06795	2.6285	0.00496225	Up
AT2G07698	AT2G07698	AT2G07698	2.62808	2.81e-09	Up
AT1G53480	MRD1	AT1G53480	2.5875	0.0307847	Up
AT2G20560	AT2G20560	AT2G20560	2.58488	3.54e-05	Up
AT1G15010	AT1G15010	AT1G15010	2.57046	0.0156992	Up
AT1G05417	AT1G05417	AT1G05417	2.56397	0.0174534	Up
ATCG01060	psaC	ATCG01060	2.54711	0.000582739	Up
AT3G56705	U2.6 AT3G56705	AT3G56705	2.53415	0.00173049	Up
AT1G18300	NUDT4	AT1G18300	2.5329	0.0325575	Up
AT3G56360	AT3G56360	AT3G56360	2.53067	0.00507545	Up
AT1G04187	AT1G04187	AT1G04187	2.5268	0.0128395	Up
AT5G40450	AT5G40450	AT5G40450	2.52046	3.45e-05	Up
AT5G09065	AT5G09065	AT5G09065	2.51636	0.00507545	Up
ATCG00100	ATCG00100	ATCG00100	2.50294	0.000342123	Up
AT2G35387	AT2G35387	AT2G35387	2.48357	0.0163858	Up
AT5G53902	U3B	AT5G53902	2.47748	7.32e-06	Up
ATCG00590	petL	ATCG00590	2.45491	0.00043669	Up
AT4G04565	AT4G04565	AT4G04565	2.43828	0.00185727	Up
ATCG00240	ATCG00240	ATCG00240	2.43763	4.25e-05	Up
AT1G28330	DYL1	AT1G28330	2.43383	0.016122	Up
ATCG00930	ATCG00930	ATCG00930	2.42164	0.000275914	Up
AT1G09800	AT1G09800	AT1G09800	2.41792	1.86e-05	Up
AT4G38560	AT4G38560	AT4G38560	2.4139	0.0456022	Up
ATCG01200	ATCG01200	ATCG01200	2.4131	0.000245145	Up
AT3G12580	HSP70	AT3G12580	2.41006	0.000275914	Up
ATCG00390	ATCG00390	ATCG00390	2.40084	0.0379404	Up
AT1G74450	AT1G74450	AT1G74450	2.40057	0.00356832	Up
AT3G16860	COBL8	AT3G16860	2.37994	0.021844	Up
ATCG01280	ycf2 ATCG01280	ATCG01280	2.3677	2.14e-07	Up
ATCG00860	ycf2 ATCG00860	ATCG00860	2.36759	1.41e-07	Up
AT5G52640	HSP90.1	AT5G52640	2.36142	0.00964534	Up
ATCG00660	rpl20	ATCG00660	2.35435	0.000207493	Up
AT1G52342	AT1G52342	AT1G52342	2.3539	0.000626376	Up
ATMG00080	rpl16 ATMG00080	ATMG00080	2.3531	1.72e-05	Up
AT2G46240	BAG6	AT2G46240	2.34548	0.00717479	Up
ATCG00110	ATCG00110	ATCG00110	2.34378	3.84e-05	Up
ATCG00330	rps14	ATCG00330	2.33089	1.1e-05	Up
AT5G20410	MGD2	AT5G20410	2.32995	0.000912317	Up
AT2G46410	CPC	AT2G46410	2.29795	0.00926986	Up
ATCG01040	ccsA	ATCG01040	2.28666	2.54e-08	Up
AT4G00960	AT4G00960	AT4G00960	2.2714	0.0325759	Up
AT2G07696	RPS7 AT2G07696	AT2G07696	2.26019	0.000755772	Up
ATCG00190	rpoB	ATCG00190	2.25242	7.26e-06	Up
ATCG00130	atpF	ATCG00130	2.24822	5.18e-06	Up
AT2G02060	AT2G02060	AT2G02060	2.24459	0.00129834	Up
AT2G07599	AT2G07599	AT2G07599	2.24354	0.00582582	Up
AT2G38210	PDX1L4	AT2G38210	2.24023	2.89e-05	Up
ATCG01300	rpl23 ATCG01300	ATCG01300	2.23351	2.78e-08	Up
AT4G17670	AT4G17670	AT4G17670	2.23214	0.00450412	Up
ATMG00660	ATMG00660	ATMG00660	2.23152	3.19e-16	Up
ATCG00840	rpl23 ATCG00840	ATCG00840	2.23149	3.08e-08	Up
AT3G21150	BBX32	AT3G21150	2.22932	0.000275914	Up
AT1G79075	AT1G79075	AT1G79075	2.21903	0.000292955	Up
AT4G36470	AT4G36470	AT4G36470	2.21343	0.00430223	Up
AT5G51440	AT5G51440	AT5G51440	2.20987	0.000353044	Up
AT2G23690	AT2G23690	AT2G23690	2.20882	0.0166046	Up
AT2G42760	AT2G42760	AT2G42760	2.2043	0.0205396	Up
AT1G06237	AT1G06237	AT1G06237	2.20346	0.00351254	Up
ATCG00650	rps18	ATCG00650	2.17684	3.77e-09	Up
ATCG00210	petN	ATCG00210	2.14558	3.04e-05	Up
ATCG00270	psbD	ATCG00270	2.13794	0.00080712	Up
AT4G23420	AT4G23420	AT4G23420	2.1325	0.0271565	Up
AT2G17300	AT2G17300	AT2G17300	2.13128	0.00232336	Up
AT5G37670	AT5G37670	AT5G37670	2.12523	0.00964534	Up
AT4G33985	AT4G33985	AT4G33985	2.12271	0.00429048	Up
ATCG00780	rpl14	ATCG00780	2.10944	8.59e-06	Up
AT2G45680	TCP9	AT2G45680	2.10643	2.3e-06	Up
AT3G05715	AT3G05715	AT3G05715	2.104	0.000189583	Up
AT2G20722	AT2G20722	AT2G20722	2.09427	0.025374	Up
ATCG00250	ATCG00250	ATCG00250	2.09283	0.0176158	Up
AT5G39785	AT5G39785	AT5G39785	2.09043	0.00928955	Up
ATCG00820	ATCG00820	ATCG00820	2.08075	1.63e-08	Up
AT4G33560	AT4G33560	AT4G33560	2.07052	3.54e-05	Up
AT4G00975	AT4G00975	AT4G00975	2.06908	0.00553214	Up
ATCG00410	ATCG00410	ATCG00410	2.06854	0.000401258	Up
AT1G04227	AT1G04227	AT1G04227	2.06304	0.00108555	Up
AT1G06553	AT1G06553	AT1G06553	2.06194	0.00610484	Up
AT3G16050	PDX1.2	AT3G16050	2.05791	9.85e-06	Up
AT1G09877	AT1G09877	AT1G09877	2.05696	0.0409818	Up
AT3G21890	BBX31	AT3G21890	2.0524	0.0149557	Up
AT2G09695	AT2G09695	AT2G09695	2.0467	0.046445	Up
ATCG00670	ATCG00670	ATCG00670	2.03487	2.48e-07	Up
AT4G06255	AT4G06255	AT4G06255	2.03152	0.00900083	Up
AT1G66080	AT1G66080	AT1G66080	2.02804	3.46e-08	Up
AT4G27130	AT4G27130	AT4G27130	2.02559	1e-05	Up
ATCG00600	petG	ATCG00600	2.0238	0.000374532	Up
AT2G07734	AT2G07734	AT2G07734	2.01626	0.0255203	Up
AT1G31835	AT1G31835	AT1G31835	2.01613	0.00287836	Up
AT1G61890	AT1G61890	AT1G61890	1.99942	0.0127046	Up
AT5G58650	PSY1	AT5G58650	1.98962	0.00414743	Up
AT5G11260	HY5	AT5G11260	1.9834	2.21e-06	Up
ATMG00990	AT2G07751 ATMG00990	ATMG00990	1.98318	4.92e-05	Up
AT1G54050	AT1G54050	AT1G54050	1.97943	0.0045627	Up
AT1G75166	AT1G75166	AT1G75166	1.97938	0.0057136	Up
AT2G07751	AT2G07751 AT2G07751	AT2G07751	1.97635	3.33e-05	Up
AT2G23430	ICK1	AT2G23430	1.96434	3.06e-07	Up
ATCG00380	rps4	ATCG00380	1.9531	1.42e-06	Up
AT5G62865	AT5G62865	AT5G62865	1.94706	0.0134734	Up
AT2G19310	AT2G19310	AT2G19310	1.94515	0.000126585	Up
AT1G20600	AT1G20600	AT1G20600	1.9433	8.58e-06	Up
AT2G20410	AT2G20410	AT2G20410	1.93663	1.63e-07	Up
AT1G18745	AT1G18745	AT1G18745	1.93601	4.05e-06	Up
AT1G26790	AT1G26790	AT1G26790	1.93001	0.00794407	Up
ATCG01190	ATCG01190	ATCG01190	1.92659	0.0265236	Up
ATCG00940	ATCG00940	ATCG00940	1.92363	0.0260935	Up
AT1G66173	AT1G66173	AT1G66173	1.92077	0.0119417	Up
AT4G06705	AT4G06705	AT4G06705	1.91967	0.0473719	Up
AT5G18670	BMY3	AT5G18670	1.90283	2.34e-05	Up
AT1G19490	AT1G19490	AT1G19490	1.8925	0.000185482	Up
ATCG00140	atpH	ATCG00140	1.89191	0.00389695	Up
AT2G05765	AT2G05765	AT2G05765	1.88633	0.0175601	Up
AT2G04955	AT2G04955	AT2G04955	1.8862	0.0142915	Up
AT2G43375	AT2G43375	AT2G43375	1.87363	0.00453424	Up
AT3G16130	ROPGEF13	AT3G16130	1.86995	0.0402562	Up
AT5G62020	HSFB2A	AT5G62020	1.85949	0.00459435	Up
AT5G13740	ZIF1	AT5G13740	1.8586	9.15e-07	Up
ATCG01110	ndhH	ATCG01110	1.84608	0.00199513	Up
ATCG01080	ndhG	ATCG01080	1.83632	0.00943401	Up
AT4G13180	AT4G13180	AT4G13180	1.83199	0.0271565	Up
AT3G20362	AT3G20362	AT3G20362	1.82232	1.82e-05	Up
AT2G41640	AT2G41640	AT2G41640	1.81918	0.0289484	Up
AT1G65486	AT1G65486	AT1G65486	1.81771	0.0366456	Up
AT2G27580	AT2G27580	AT2G27580	1.81766	2.27e-06	Up
AT4G35750	AT4G35750	AT4G35750	1.81188	0.0450217	Up
AT3G07735	AT3G07735	AT3G07735	1.80854	0.0353624	Up
AT4G09030	AGP10	AT4G09030	1.79544	0.000819233	Up
AT4G35985	AT4G35985	AT4G35985	1.79268	0.0351938	Up
AT3G14200	AT3G14200	AT3G14200	1.7758	5.37e-05	Up
AT5G23760	AT5G23760	AT5G23760	1.77517	2.37e-05	Up
AT4G35783	RTFL6	AT4G35783	1.76097	0.00427904	Up
AT3G10910	AT3G10910	AT3G10910	1.76054	0.0283346	Up
AT1G16916	AT1G16916	AT1G16916	1.75098	3.91e-09	Up
AT5G27440	AT5G27440	AT5G27440	1.7504	0.0422944	Up
AT1G49245	AT1G49245	AT1G49245	1.74931	1.65e-08	Up
AT5G52570	BETA-OHASE 2	AT5G52570	1.74373	0.00741509	Up
AT3G56290	AT3G56290	AT3G56290	1.74191	0.00015159	Up
AT2G25530	AT2G25530	AT2G25530	1.7373	0.00624959	Up
ATCG00090	ATCG00090	ATCG00090	1.73616	0.00462868	Up
AT5G17050	UGT78D2	AT5G17050	1.72964	0.000633486	Up
AT5G12360	AT5G12360	AT5G12360	1.72904	0.0376487	Up
ATCG00500	accD	ATCG00500	1.72706	1.12e-08	Up
AT1G23150	AT1G23150	AT1G23150	1.71392	0.0223303	Up
ATMG01390	ATMG01390	ATMG01390	1.6969	0.026599	Up
AT1G68440	AT1G68440	AT1G68440	1.69291	0.00381906	Up
AT4G19700	RING	AT4G19700	1.68685	0.00597494	Up
AT1G70090	LGT8	AT1G70090	1.68163	0.00427904	Up
AT5G04890	RTM2	AT5G04890	1.6811	0.0428824	Up
AT5G53880	AT5G53880	AT5G53880	1.68052	0.013517	Up
ATCG00180	rpoC1	ATCG00180	1.67927	0.000135856	Up
AT5G03285	AT5G03285	AT5G03285	1.67737	0.00244545	Up
ATCG00160	rps2	ATCG00160	1.67481	0.00011349	Up
AT3G61640	AGP20	AT3G61640	1.66647	0.00011538	Up
AT3G20600	NDR1	AT3G20600	1.66502	0.0149233	Up
AT1G12020	AT1G12020	AT1G12020	1.66482	2.43e-07	Up
AT1G70985	AT1G70985	AT1G70985	1.65561	0.00209382	Up
AT3G10300	AT3G10300	AT3G10300	1.65252	0.00856175	Up
AT2G23120	AT2G23120	AT2G23120	1.64979	0.00553073	Up
AT5G18255	AT5G18255	AT5G18255	1.64415	0.00131643	Up
AT3G55390	AT3G55390	AT3G55390	1.64184	0.0281049	Up
AT3G21560	UGT84A2	AT3G21560	1.6416	0.00435853	Up
AT3G13275	AT3G13275	AT3G13275	1.64082	0.00132662	Up
AT3G13520	AGP12	AT3G13520	1.63462	0.00438755	Up
AT2G46192	AT2G46192	AT2G46192	1.63273	9.75e-05	Up
AT1G65870	AT1G65870	AT1G65870	1.63168	0.0247072	Up
AT1G49780	PUB26	AT1G49780	1.62144	4.25e-05	Up
AT2G09700	AT2G09700	AT2G09700	1.61926	0.00125358	Up
AT5G02490	Hsp70-2	AT5G02490	1.61794	0.0455251	Up
AT1G01130	AT1G01130	AT1G01130	1.60026	0.039963	Up
AT1G06233	AT1G06233	AT1G06233	1.58638	0.0364001	Up
AT1G58150	AT1G58150	AT1G58150	1.58542	0.0271565	Up
AT5G24590	TIP	AT5G24590	1.58512	0.0192345	Up
AT2G32960	PFA-DSP2	AT2G32960	1.57696	0.0199478	Up
AT3G59068	AT3G59068	AT3G59068	1.57663	0.0164961	Up
AT2G33480	NAC041	AT2G33480	1.56935	0.0122293	Up
AT3G17609	HYH	AT3G17609	1.56389	1.82e-05	Up
ATCG00470	atpE	ATCG00470	1.56337	0.000755804	Up
AT3G18290	BTS	AT3G18290	1.56259	0.000276552	Up
AT4G34590	GBF6	AT4G34590	1.56251	0.0373024	Up
AT5G16160	AT5G16160	AT5G16160	1.55548	0.0368852	Up
AT5G52250	RUP1	AT5G52250	1.54703	0.045376	Up
AT4G32290	AT4G32290	AT4G32290	1.54327	0.00445609	Up
AT3G15210	ERF4	AT3G15210	1.54253	0.0203213	Up
AT5G63500	AT5G63500	AT5G63500	1.54173	8.53e-06	Up
AT1G04625	AT1G04625	AT1G04625	1.54111	5.48e-05	Up
AT1G06573	AT1G06573	AT1G06573	1.53979	1.54e-05	Up
AT1G22530	PATL2	AT1G22530	1.53793	0.0152989	Up
AT1G55850	CSLE1	AT1G55850	1.53015	0.045797	Up
AT3G56020	AT3G56020	AT3G56020	1.5108	0.00791663	Up
ATCG00540	petA	ATCG00540	1.50972	0.00366737	Up
AT5G56040	AT5G56040	AT5G56040	1.50778	0.0187113	Up
ATCG01240	rps7-A ATCG01240	ATCG01240	1.50475	2.37e-05	Up
AT3G58850	PAR2	AT3G58850	1.50472	0.00408045	Up
ATCG00900	rps7-A ATCG00900	ATCG00900	1.50463	2.37e-05	Up
AT4G18010	IP5PII	AT4G18010	1.50005	0.0345075	Up
AT2G40711	AT2G40711	AT2G40711	1.49634	0.0270109	Up
AT1G34760	GRF11	AT1G34760	1.48784	0.00474033	Up
AT4G27940	MTM1 AT4G27940	AT4G27940	1.48753	0.00975268	Up
AT5G55570	AT5G55570	AT5G55570	1.48574	0.0492641	Up
AT5G58760	DDB2	AT5G58760	1.4854	1.8e-06	Up
AT4G32890	GATA9	AT4G32890	1.48488	0.00244545	Up
AT5G13180	NAC083	AT5G13180	1.48242	0.00106745	Up
AT1G03870	FLA9	AT1G03870	1.47778	0.0306768	Up
AT5G44582	AT5G44582	AT5G44582	1.4751	0.0323666	Up
AT2G27470	NF-YB11	AT2G27470	1.47419	0.00338303	Up
AT5G23730	RUP2	AT5G23730	1.47161	5.65e-06	Up
ATCG00790	rpl16 ATCG00790	ATCG00790	1.46842	0.00209382	Up
AT1G28600	AT1G28600	AT1G28600	1.46666	0.000131301	Up
AT5G10310	AT5G10310	AT5G10310	1.4626	0.0423122	Up
AT1G07350	SR45a	AT1G07350	1.46252	4.25e-05	Up
ATCG00770	rps8	ATCG00770	1.45802	0.004064	Up
AT1G64490	AT1G64490	AT1G64490	1.45731	0.000677106	Up
AT3G01470	HB-1 AT3G01470	AT3G01470	1.45724	0.0115513	Up
AT3G03165	AT3G03165	AT3G03165	1.45476	0.0390801	Up
AT5G37550	AT5G37550	AT5G37550	1.45418	0.00875131	Up
AT1G09027	AT1G09027	AT1G09027	1.44893	9.15e-07	Up
ATCG00300	psbZ	ATCG00300	1.44502	0.0374954	Up
AT3G52360	AT3G52360	AT3G52360	1.43842	0.0127046	Up
AT1G80520	AT1G80520	AT1G80520	1.42604	0.00438932	Up
AT2G23672	AT2G23672	AT2G23672	1.42571	0.00156644	Up
AT3G05685	AT3G05685	AT3G05685	1.42182	0.00158749	Up
AT1G09810	ECT11	AT1G09810	1.42052	7.73e-06	Up
AT1G42430	AT1G42430	AT1G42430	1.41919	0.000488036	Up
AT1G04070	TOM22-I	AT1G04070	1.41902	0.000240287	Up
AT1G79160	AT1G79160	AT1G79160	1.41868	0.00787682	Up
ATCG00170	rpoC2	ATCG00170	1.40925	0.00276135	Up
AT2G28305	LOG1	AT2G28305	1.40879	0.00240576	Up
AT2G28350	ARF10	AT2G28350	1.40841	0.025374	Up
AT5G44180	RLT2	AT5G44180	1.40684	0.000948058	Up
AT3G27270	AT3G27270	AT3G27270	1.40668	0.0278945	Up
AT5G16200	AT5G16200	AT5G16200	1.40584	0.00637104	Up
AT4G24700	AT4G24700	AT4G24700	1.40478	7.32e-06	Up
AT1G55530	AT1G55530	AT1G55530	1.40361	1.11e-07	Up
AT5G14760	AO	AT5G14760	1.395	0.0416112	Up
AT2G44670	AT2G44670	AT2G44670	1.39197	6.72e-06	Up
ATCG01020	rpl32	ATCG01020	1.39103	0.00209382	Up
AT5G44110	ABCI21	AT5G44110	1.38595	0.0374954	Up
AT3G21870	CYCP2;1	AT3G21870	1.37818	0.0103984	Up
AT5G22608	AT5G22608	AT5G22608	1.37718	0.00292568	Up
AT4G28290	AT4G28290	AT4G28290	1.37178	0.0171117	Up
AT5G02270	ABCI20	AT5G02270	1.37176	1.05e-06	Up
AT4G39366	AT4G39366	AT4G39366	1.36778	0.00329323	Up
AT5G24735	AT5G24735	AT5G24735	1.36682	0.0125649	Up
AT2G43745	AT2G43745	AT2G43745	1.35034	2.57e-05	Up
AT3G09455	AT3G09455	AT3G09455	1.34751	0.000357694	Up
AT2G05185	AT2G05185	AT2G05185	1.34606	0.0124063	Up
AT5G01220	SQD2	AT5G01220	1.34523	0.0448829	Up
AT5G44565	AT5G44565	AT5G44565	1.34294	0.02825	Up
AT2G07708	AT2G07708	AT2G07708	1.34145	0.000582739	Up
AT5G67510	AT5G67510	AT5G67510	1.34112	0.00153789	Up
AT3G08520	AT3G08520	AT3G08520	1.34108	0.0103856	Up
AT4G16370	OPT3	AT4G16370	1.34045	0.0352328	Up
AT5G20885	AT5G20885	AT5G20885	1.33613	2.94e-06	Up
AT1G65440	GTB1	AT1G65440	1.33296	0.000160851	Up
AT1G09250	AT1G09250	AT1G09250	1.33092	0.000523459	Up
AT5G24165	AT5G24165	AT5G24165	1.31601	0.0043074	Up
AT3G15115	AT3G15115	AT3G15115	1.31527	0.00365562	Up
AT1G54690	GAMMA-H2AX	AT1G54690	1.30921	0.0124489	Up
AT2G34585	AT2G34585	AT2G34585	1.30507	8.07e-07	Up
AT2G33435	AT2G33435	AT2G33435	1.30497	0.00658173	Up
AT5G65380	AT5G65380	AT5G65380	1.30288	0.000915032	Up
AT5G18150	AT5G18150	AT5G18150	1.29112	0.000896118	Up
AT3G09440	AT3G09440	AT3G09440	1.29064	0.0128471	Up
AT5G28450	AT5G28450	AT5G28450	1.28727	0.00137177	Up
ATCG00220	psbM	ATCG00220	1.28247	0.0412717	Up
AT1G01060	LHY	AT1G01060	1.28204	1.23e-06	Up
AT5G35320	AT5G35320	AT5G35320	1.28131	0.000265254	Up
AT5G26865	AT5G26865	AT5G26865	1.28127	0.014997	Up
AT3G48115	AT3G48115	AT3G48115	1.27817	0.00914104	Up
AT5G56030	HSP81-2	AT5G56030	1.27813	0.00171377	Up
AT2G39675	TAS1C	AT2G39675	1.27605	0.0296815	Up
AT5G09225	AT5G09225	AT5G09225	1.27442	0.000488036	Up
AT4G23570	SGT1A	AT4G23570	1.26966	0.0439839	Up
ATMG00690	ATMG00690	ATMG00690	1.26695	0.0369612	Up
AT2G27190	PAP12	AT2G27190	1.26541	0.0409818	Up
AT1G73870	BBX16	AT1G73870	1.26441	0.0323666	Up
AT4G17085	AT4G17085	AT4G17085	1.26149	0.00255678	Up
AT4G31870	GPX7	AT4G31870	1.26049	0.0166446	Up
AT1G26665	AT1G26665	AT1G26665	1.25626	0.0254826	Up
AT1G16790	AT1G16790	AT1G16790	1.25461	0.0214906	Up
AT3G03590	AT3G03590	AT3G03590	1.25254	0.00326222	Up
AT4G33440	AT4G33440	AT4G33440	1.24788	0.0213756	Up
AT5G60030	AT5G60030	AT5G60030	1.24503	0.0045627	Up
AT3G47675	AT3G47675	AT3G47675	1.24458	0.0257307	Up
AT3G23605	AT3G23605	AT3G23605	1.23965	0.00199289	Up
AT3G55770	WLIM2b	AT3G55770	1.23871	3.2e-09	Up
AT2G22850	bZIP6	AT2G22850	1.23141	0.0393622	Up
AT4G16447	AT4G16447	AT4G16447	1.22839	0.00653709	Up
AT5G03555	NCS1	AT5G03555	1.22793	1.86e-05	Up
AT1G08973	AT1G08973	AT1G08973	1.22772	0.0145184	Up
AT3G47836	AT3G47836	AT3G47836	1.2218	6.29e-07	Up
AT4G39235	AT4G39235	AT4G39235	1.2181	6.29e-07	Up
AT5G66320	GATA5	AT5G66320	1.2142	0.0257879	Up
AT3G21690	AT3G21690	AT3G21690	1.21315	0.00964534	Up
AT1G67230	LINC1	AT1G67230	1.21271	4.78e-05	Up
AT1G51060	HTA10	AT1G51060	1.21262	0.0347606	Up
AT3G51920	CAM9	AT3G51920	1.21202	0.0175601	Up
AT4G16840	AT4G16840	AT4G16840	1.21102	0.00392147	Up
AT1G51680	4CL1	AT1G51680	1.20858	0.0228165	Up
AT5G64850	AT5G64850	AT5G64850	1.20371	0.00741238	Up
AT5G65860	AT5G65860	AT5G65860	1.20291	0.042441	Up
AT4G36515	AT4G36515	AT4G36515	1.19554	0.00357689	Up
AT1G66840	PMI2	AT1G66840	1.19535	0.000819233	Up
AT1G70000	AT1G70000	AT1G70000	1.19518	0.00881348	Up
AT5G53590	AT5G53590	AT5G53590	1.19444	0.0265236	Up
AT1G07790	HTB1	AT1G07790	1.19427	0.000855711	Up
AT3G16175	AT3G16175	AT3G16175	1.19386	0.0044329	Up
AT3G07230	AT3G07230	AT3G07230	1.18614	0.000173684	Up
AT5G01880	AT5G01880	AT5G01880	1.18435	0.0175601	Up
AT3G01860	AT3G01860	AT3G01860	1.18214	0.0306968	Up
AT1G75770	AT1G75770	AT1G75770	1.17528	0.0205216	Up
AT4G31310	AT4G31310	AT4G31310	1.17343	0.000453172	Up
AT5G38150	PMI15	AT5G38150	1.17261	0.0464479	Up
AT3G46030	HTB11	AT3G46030	1.171	0.00229059	Up
AT4G11660	AT-HSFB2B	AT4G11660	1.17026	0.0150001	Up
AT1G67340	AT1G67340	AT1G67340	1.16849	0.0372673	Up
AT1G73660	AT1G73660	AT1G73660	1.16614	0.000425336	Up
AT4G31570	AT4G31570	AT4G31570	1.16566	0.0225995	Up
AT3G11230	AT3G11230	AT3G11230	1.16372	0.039346	Up
AT4G32610	AT4G32610	AT4G32610	1.16293	1.33e-06	Up
AT2G26975	COPT6	AT2G26975	1.16077	0.00410623	Up
AT5G16730	AT5G16730	AT5G16730	1.15286	0.0014572	Up
AT4G25225	AT4G25225	AT4G25225	1.14991	0.00582582	Up
AT5G60460	AT5G60460	AT5G60460	1.1446	0.00142964	Up
AT2G46735	AT2G46735	AT2G46735	1.14262	0.000312661	Up
AT4G32030	AT4G32030	AT4G32030	1.14052	0.000165677	Up
AT3G24080	AT3G24080	AT3G24080	1.13526	0.0218305	Up
AT5G05210	AT5G05210	AT5G05210	1.12495	0.0011091	Up
AT2G44430	AT2G44430	AT2G44430	1.12142	0.00970785	Up
AT1G27695	AT1G27695	AT1G27695	1.11699	1.01e-05	Up
AT5G67190	DEAR2	AT5G67190	1.11042	0.0271565	Up
AT5G23460	AT5G23460	AT5G23460	1.10824	0.00582582	Up
AT5G52870	MAKR5	AT5G52870	1.1001	0.000127589	Up
AT1G31280	AGO2	AT1G31280	1.09519	0.00115635	Up
AT2G25250	AT2G25250	AT2G25250	1.09505	0.0120977	Up
AT2G28330	AT2G28330	AT2G28330	1.09088	0.0144324	Up
AT5G62900	AT5G62900	AT5G62900	1.09027	0.00420435	Up
AT3G56910	PSRP5	AT3G56910	1.08468	0.0321796	Up
AT5G42060	AT5G42060	AT5G42060	1.08377	0.00222286	Up
AT2G35795	AT2G35795	AT2G35795	1.08324	0.00162235	Up
AT5G56010	HSP81-3	AT5G56010	1.08149	0.0089962	Up
AT3G11490	AT3G11490	AT3G11490	1.08031	0.0175601	Up
AT3G12050	AT3G12050	AT3G12050	1.0776	2.78e-08	Up
AT5G66770	AT5G66770	AT5G66770	1.0734	0.0131273	Up
AT2G36930	AT2G36930	AT2G36930	1.07337	0.0354904	Up
ATCG00810	rpl22	ATCG00810	1.06823	0.0354904	Up
AT5G03460	AT5G03460	AT5G03460	1.06739	0.000943977	Up
AT2G45100	AT2G45100	AT2G45100	1.06168	0.0212565	Up
AT1G52825	AT1G52825	AT1G52825	1.05956	0.000819233	Up
AT5G10750	AT5G10750	AT5G10750	1.05844	0.0138343	Up
AT3G57930	AT3G57930	AT3G57930	1.05675	0.0292534	Up
AT5G41020	AT5G41020	AT5G41020	1.05658	0.0313812	Up
AT2G46450	CNGC12	AT2G46450	1.05572	0.0356706	Up
AT4G21610	LOL2	AT4G21610	1.05495	0.0420391	Up
AT5G60340	AAK6	AT5G60340	1.04737	0.0132066	Up
AT1G78510	SPS1	AT1G78510	1.04674	0.0289172	Up
AT5G65575	AT5G65575	AT5G65575	1.0462	0.000912317	Up
AT5G13090	AT5G13090	AT5G13090	1.04144	0.0143704	Up
AT3G07215	AT3G07215	AT3G07215	1.04006	0.0143704	Up
AT2G27960	CKS1	AT2G27960	1.03974	0.00928955	Up
AT5G40340	AT5G40340	AT5G40340	1.03915	0.024656	Up
AT3G18300	AT3G18300	AT3G18300	1.03872	0.0204282	Up
AT5G67440	NPY3	AT5G67440	1.03479	8.8e-05	Up
AT2G38230	PDX1.1	AT2G38230	1.03281	0.0347794	Up
AT2G45860	AT2G45860	AT2G45860	1.03258	0.00911596	Up
AT1G50055	TAS1B	AT1G50055	1.03186	0.0142915	Up
AT2G33510	AT2G33510	AT2G33510	1.03057	0.0455822	Up
AT4G36710	HAM4	AT4G36710	1.02366	0.0146889	Up
AT1G75810	AT1G75810	AT1G75810	1.01873	0.0425191	Up
AT5G41790	CIP1	AT5G41790	1.01748	0.010852	Up
AT2G16930	AT2G16930	AT2G16930	1.0171	0.000218491	Up
AT2G23985	AT2G23985	AT2G23985	1.01606	1.1e-05	Up
AT2G31490	AT2G31490	AT2G31490	1.01541	8.62e-06	Up
AT5G24980	AT5G24980	AT5G24980	1.01478	0.0106817	Up
AT5G13340	AT5G13340	AT5G13340	1.00925	0.00513587	Up
AT4G25700	BETA-OHASE 1	AT4G25700	1.00777	0.0055411	Up
AT5G42100	BG_PPAP	AT5G42100	1.00608	0.0493025	Up
AT3G12965	AT3G12965	AT3G12965	1.00561	0.0325575	Up
AT5G58730	Mik	AT5G58730	1.005	0.0467083	Up
AT1G58235	AT1G58235	AT1G58235	1.00465	0.0449254	Up
AT4G30440	GAE1	AT4G30440	1.00378	0.017623	Up
AT1G50420	SCL3	AT1G50420	1.00175	0.00329295	Up
AT3G54500	AT3G54500	AT3G54500	1.0006	0.0033078	Up
AT3G53600	AT3G53600	AT3G53600	-14.8778	1.66e-11	Down
AT4G24310	AT4G24310	AT4G24310	-12.5863	6.48e-06	Down
AT5G09530	PELPK1	AT5G09530	-11.6435	0.00414743	Down
AT3G58780	SHP1	AT3G58780	-6.36286	9.41e-05	Down
AT1G75945	AT1G75945	AT1G75945	-5.18759	0.000342777	Down
AT1G02190	AT1G02190	AT1G02190	-4.9689	0.0194076	Down
AT2G20880	ERF53	AT2G20880	-4.39334	0.00445032	Down
AT1G30100	NCED5	AT1G30100	-3.89509	0.0434339	Down
AT1G49230	AT1G49230	AT1G49230	-3.80215	0.0281913	Down
AT3G21420	LBO1	AT3G21420	-3.76382	0.0347606	Down
AT4G28140	AT4G28140	AT4G28140	-3.66621	0.034291	Down
AT5G65080	MAF5	AT5G65080	-3.61805	0.0244296	Down
AT4G16590	CSLA01	AT4G16590	-3.5021	0.0119417	Down
AT1G31173	ath-MIR167d	AT1G31173	-3.48904	0.0353624	Down
AT2G38530	LTP2	AT2G38530	-3.44991	0.0212246	Down
AT1G67260	TCP1	AT1G67260	-3.3788	0.0466281	Down
AT1G21140	AT1G21140	AT1G21140	-3.30781	0.00288782	Down
AT2G18700	TPS11	AT2G18700	-3.20509	0.000163865	Down
AT4G15210	BAM5	AT4G15210	-3.13894	0.00928955	Down
AT4G30290	XTH19	AT4G30290	-3.10124	0.00880879	Down
AT2G37770	ChlAKR	AT2G37770	-3.0849	0.0162761	Down
AT1G70820	AT1G70820	AT1G70820	-3.06004	1.93e-08	Down
AT1G34060	AT1G34060	AT1G34060	-2.98989	0.0368586	Down
AT4G34950	AT4G34950	AT4G34950	-2.9483	0.000342792	Down
AT1G76800	AT1G76800	AT1G76800	-2.93664	8.92e-05	Down
AT2G41510	CKX1	AT2G41510	-2.86592	0.0286361	Down
AT5G54510	DFL1	AT5G54510	-2.83871	0.0262845	Down
AT4G15700	AT4G15700	AT4G15700	-2.8048	0.0204048	Down
AT4G21440	MYB102	AT4G21440	-2.79507	0.028202	Down
AT3G55240	AT3G55240	AT3G55240	-2.75119	0.000979541	Down
AT1G73570	AT1G73570	AT1G73570	-2.73253	0.0102797	Down
AT4G37180	AT4G37180	AT4G37180	-2.66357	0.00875131	Down
AT1G02300	AT1G02300	AT1G02300	-2.64202	7.19e-05	Down
AT4G17470	AT4G17470	AT4G17470	-2.61323	0.0299906	Down
AT5G01600	FER1	AT5G01600	-2.51467	0.00260391	Down
AT4G39120	IMPL2	AT4G39120	-2.48875	4.32e-06	Down
AT3G53800	Fes1B	AT3G53800	-2.45939	0.0118144	Down
AT1G23870	TPS9	AT1G23870	-2.43827	0.00424202	Down
AT1G80440	AT1G80440	AT1G80440	-2.42888	0.0275522	Down
AT4G21760	BGLU47	AT4G21760	-2.42154	0.0458841	Down
AT1G73600	AT1G73600	AT1G73600	-2.40841	0.0106395	Down
AT2G47780	AT2G47780	AT2G47780	-2.31876	0.0016837	Down
AT1G53160	SPL4	AT1G53160	-2.31527	0.019701	Down
AT4G38050	AT4G38050	AT4G38050	-2.30604	0.0350395	Down
AT2G44130	AT2G44130	AT2G44130	-2.28212	0.00137014	Down
AT4G18440	AT4G18440	AT4G18440	-2.24123	0.00667226	Down
AT2G16750	AT2G16750	AT2G16750	-2.22374	0.0212182	Down
AT1G53440	AT1G53440	AT1G53440	-2.22237	0.000488036	Down
AT4G27450	AT4G27450	AT4G27450	-2.20847	0.0321796	Down
AT2G44640	AT2G44640	AT2G44640	-2.15803	0.00967357	Down
AT1G73750	AT1G73750	AT1G73750	-2.14409	0.000697474	Down
AT1G29395	COR413IM1	AT1G29395	-2.10576	0.00463983	Down
AT3G24420	AT3G24420	AT3G24420	-2.10454	0.0164961	Down
AT4G22710	CYP706A2	AT4G22710	-2.08838	0.00011902	Down
AT3G16410	NSP4	AT3G16410	-2.07025	0.0268128	Down
AT3G25770	AOC2	AT3G25770	-2.0648	0.020312	Down
AT1G68190	BBX27	AT1G68190	-2.04008	0.00941016	Down
AT2G16660	AT2G16660	AT2G16660	-2.03937	0.045376	Down
AT1G59990	EMB3108	AT1G59990	-2.03047	9.85e-06	Down
AT3G18773	AT3G18773	AT3G18773	-2.02853	0.00425535	Down
AT1G55980	AT1G55980	AT1G55980	-2.02647	0.0115513	Down
AT1G15510	ECB2	AT1G15510	-2.02195	0.025374	Down
AT4G17970	ALMT12	AT4G17970	-2.02037	0.015888	Down
AT4G21890	AT4G21890	AT4G21890	-1.97915	0.0159536	Down
AT3G52180	SEX4	AT3G52180	-1.97647	0.000198226	Down
AT1G77760	NIA1	AT1G77760	-1.96735	0.0382032	Down
AT5G67480	BT4	AT5G67480	-1.93865	0.00592049	Down
AT3G07350	F21O3.6	AT3G07350	-1.92084	0.00371001	Down
AT1G73920	AT1G73920	AT1G73920	-1.90686	4.1e-06	Down
AT5G50950	FUM2	AT5G50950	-1.90002	0.0272483	Down
AT3G05345	AT3G05345	AT3G05345	-1.87464	1.61e-05	Down
AT4G37100	AT4G37100	AT4G37100	-1.87027	0.0069155	Down
AT1G79920	Hsp70-15	AT1G79920	-1.86247	3.16e-13	Down
AT2G29670	AT2G29670	AT2G29670	-1.86193	0.0230344	Down
AT4G14230	AT4G14230	AT4G14230	-1.83337	2.94e-06	Down
AT1G12090	ELP	AT1G12090	-1.81983	0.0227402	Down
ATCG00720	petB	ATCG00720	-1.81154	4.76e-05	Down
AT1G01240	AT1G01240	AT1G01240	-1.80995	0.00875131	Down
AT5G63580	FLS2 AT5G63580	AT5G63580	-1.79073	0.00168887	Down
AT2G39800	P5CS1	AT2G39800	-1.78137	0.0441953	Down
AT1G19550	AT1G19550	AT1G19550	-1.74731	0.0277429	Down
AT3G23080	AT3G23080	AT3G23080	-1.73665	0.000522303	Down
AT2G25900	ATCTH	AT2G25900	-1.73149	0.0329322	Down
AT1G22540	AT1G22540	AT1G22540	-1.71312	0.00914104	Down
AT3G05640	AT3G05640	AT3G05640	-1.713	0.0175601	Down
AT3G53090	UPL7	AT3G53090	-1.68453	0.00725601	Down
AT4G21060	AT4G21060	AT4G21060	-1.68069	0.0292223	Down
AT5G22920	AT5G22920	AT5G22920	-1.67836	0.0437989	Down
AT5G43440	AT5G43440	AT5G43440	-1.66003	0.0321796	Down
AT5G53120	SPDS3	AT5G53120	-1.63362	0.0292223	Down
AT5G23880	CPSF100	AT5G23880	-1.61616	0.00609984	Down
AT1G16780	VHP2;2	AT1G16780	-1.572	0.0492641	Down
AT3G10020	AT3G10020	AT3G10020	-1.57135	0.00542548	Down
AT2G42610	LSH10	AT2G42610	-1.56672	0.00613113	Down
AT1G75900	AT1G75900	AT1G75900	-1.56467	0.0289728	Down
AT5G40850	UPM1	AT5G40850	-1.5646	0.00322802	Down
AT4G18270	TRANS11	AT4G18270	-1.55996	0.00414743	Down
AT1G28310	AT1G28310	AT1G28310	-1.55996	0.000281057	Down
AT1G64380	AT1G64380	AT1G64380	-1.53781	0.0253269	Down
AT1G78680	GGH2	AT1G78680	-1.52589	0.00527869	Down
AT4G35440	CLC-E	AT4G35440	-1.5069	0.00764954	Down
AT4G38470	STY46	AT4G38470	-1.50592	0.000635339	Down
AT3G50430	AT3G50430	AT3G50430	-1.49867	0.0342491	Down
AT4G21700	AT4G21700	AT4G21700	-1.49737	0.0114551	Down
AT5G56180	ARP8	AT5G56180	-1.49458	0.0106912	Down
AT2G46640	AT2G46640	AT2G46640	-1.48818	0.0374181	Down
AT3G56080	AT3G56080	AT3G56080	-1.47792	0.0115866	Down
AT3G03640	BGLU25	AT3G03640	-1.43972	0.0268205	Down
AT5G59430	TRP1 AT5G59430	AT5G59430	-1.43049	0.0452848	Down
AT1G15215	SHH1	AT1G15215	-1.41223	0.0109801	Down
AT2G38820	AT2G38820	AT2G38820	-1.41182	0.00803972	Down
AT1G30680	AT1G30680	AT1G30680	-1.39921	0.00399245	Down
AT2G46060	AT2G46060	AT2G46060	-1.39724	0.00210788	Down
AT1G69830	AMY3	AT1G69830	-1.39005	0.00101487	Down
AT1G73480	AT1G73480	AT1G73480	-1.38853	0.0354904	Down
AT2G39910	AT2G39910	AT2G39910	-1.38678	0.00220034	Down
AT4G03510	RMA1	AT4G03510	-1.38585	0.0324973	Down
AT1G70520	CRK2	AT1G70520	-1.38224	0.0313634	Down
AT1G04400	CRY2	AT1G04400	-1.38115	2.37e-05	Down
AT1G78890	AT1G78890	AT1G78890	-1.37932	0.00111757	Down
AT4G24800	ECIP1	AT4G24800	-1.3645	0.00459766	Down
AT2G44660	AT2G44660	AT2G44660	-1.36161	0.0026034	Down
AT5G51290	ACD5	AT5G51290	-1.34184	0.0347889	Down
AT1G69370	CM3	AT1G69370	-1.34074	0.0208142	Down
AT3G62010	AT3G62010	AT3G62010	-1.32664	0.000129177	Down
AT1G27595	AT1G27595	AT1G27595	-1.32551	0.0268228	Down
AT1G13180	DIS1	AT1G13180	-1.31957	0.0199945	Down
AT4G23730	AT4G23730	AT4G23730	-1.31811	0.000624415	Down
AT4G04970	GSL1	AT4G04970	-1.30758	0.00462868	Down
AT5G56600	PRF3	AT5G56600	-1.30458	0.00928955	Down
AT5G39790	AT5G39790	AT5G39790	-1.29652	0.01405	Down
AT4G08920	CRY1	AT4G08920	-1.2959	1.42e-05	Down
AT5G18630	AT5G18630	AT5G18630	-1.28537	0.0381922	Down
AT1G17990	AT1G17990	AT1G17990	-1.28325	0.0346296	Down
AT1G10090	AT1G10090	AT1G10090	-1.28105	0.0393006	Down
AT5G02650	AT5G02650	AT5G02650	-1.27739	0.0310572	Down
AT4G17830	AT4G17830	AT4G17830	-1.27537	9.15e-05	Down
AT1G66900	AT1G66900	AT1G66900	-1.26922	0.00174746	Down
AT1G70580	AOAT2	AT1G70580	-1.24967	0.0181007	Down
AT3G29090	PME31	AT3G29090	-1.23622	0.00350242	Down
AT2G46550	AT2G46550	AT2G46550	-1.23062	0.00115093	Down
AT1G62200	PTR6	AT1G62200	-1.21701	0.00459766	Down
AT5G41670	AT5G41670	AT5G41670	-1.21146	1.01e-05	Down
AT1G49350	AT1G49350	AT1G49350	-1.20962	0.0088819	Down
AT4G26510	UKL4	AT4G26510	-1.20761	1.4e-06	Down
AT5G64380	AT5G64380	AT5G64380	-1.20265	0.0168812	Down
ATCG00480	atpB	ATCG00480	-1.19762	0.0204322	Down
AT1G67310	AT1G67310	AT1G67310	-1.1966	0.0384108	Down
AT1G67300	AT1G67300	AT1G67300	-1.19634	0.0220021	Down
AT1G08550	NPQ1	AT1G08550	-1.1923	7.17e-06	Down
AT2G40840	DPE2	AT2G40840	-1.19102	0.0205995	Down
AT1G67840	CSK	AT1G67840	-1.18932	0.000477283	Down
AT2G43020	PAO2	AT2G43020	-1.18152	0.0116836	Down
AT5G20000	AT5G20000	AT5G20000	-1.16903	0.00456794	Down
AT4G25650	ACD1-LIKE	AT4G25650	-1.16516	0.00398586	Down
AT5G24340	AT5G24340	AT5G24340	-1.15997	0.00119168	Down
AT1G70070	EMB25	AT1G70070	-1.15756	0.00137014	Down
AT3G10405	AT3G10405	AT3G10405	-1.15424	0.0164961	Down
AT3G44160	AT3G44160	AT3G44160	-1.15266	0.00425267	Down
AT4G24630	AT4G24630	AT4G24630	-1.15097	0.0187538	Down
AT4G02730	WDR5b	AT4G02730	-1.13567	0.0440678	Down
AT5G61670	AT5G61670	AT5G61670	-1.13303	0.0118212	Down
AT1G21790	AT1G21790	AT1G21790	-1.13291	0.0304414	Down
AT2G24120	SCA3	AT2G24120	-1.12551	0.0378787	Down
AT2G43330	INT1	AT2G43330	-1.12449	0.001071	Down
AT4G27710	CYP709B3	AT4G27710	-1.1211	0.00169039	Down
AT5G66420	AT5G66420	AT5G66420	-1.12105	0.0325154	Down
AT2G42240	AT2G42240	AT2G42240	-1.11756	0.00454141	Down
AT4G09560	AT4G09560	AT4G09560	-1.11679	0.00879156	Down
AT1G27580	AT1G27580	AT1G27580	-1.11479	0.00171377	Down
AT3G11470	AT3G11470	AT3G11470	-1.10174	0.00534482	Down
AT1G71696	SOL1 AT1G71696	AT1G71696	-1.09848	0.00649547	Down
AT3G10940	LSF2	AT3G10940	-1.09674	0.0327883	Down
AT5G14285	AT5G14285	AT5G14285	-1.09655	0.00378064	Down
AT1G75370	AT1G75370	AT1G75370	-1.08874	0.00563164	Down
AT4G13495	AT4G13495	AT4G13495	-1.08787	0.0381922	Down
AT5G52030	AT5G52030	AT5G52030	-1.08172	0.000129177	Down
AT1G77680	AT1G77680	AT1G77680	-1.08016	0.00872435	Down
AT1G24440	AT1G24440	AT1G24440	-1.07921	0.0310572	Down
AT4G14500	AT4G14500	AT4G14500	-1.07739	1.73e-06	Down
AT1G23400	CAF2	AT1G23400	-1.07735	3.84e-05	Down
AT1G01650	SPPL4	AT1G01650	-1.07428	0.00436985	Down
AT3G54030	BSK6	AT3G54030	-1.07265	0.00648567	Down
AT5G46390	AT5G46390	AT5G46390	-1.07026	9.33e-06	Down
AT2G47600	MHX	AT2G47600	-1.06422	0.0310572	Down
AT1G21780	AT1G21780	AT1G21780	-1.06415	0.000938757	Down
AT5G03420	AT5G03420	AT5G03420	-1.06083	0.00263408	Down
AT5G59960	AT5G59960	AT5G59960	-1.05995	0.042346	Down
AT2G20180	PIL5	AT2G20180	-1.05712	0.0104448	Down
AT2G21230	AT2G21230	AT2G21230	-1.05366	0.000129177	Down
AT5G40760	G6PD6	AT5G40760	-1.05241	0.00970785	Down
AT1G08420	BSL2	AT1G08420	-1.04645	0.0143704	Down
AT3G46980	PHT4;3	AT3G46980	-1.0443	0.000563869	Down
AT5G02810	PRR7	AT5G02810	-1.03477	0.0014131	Down
ATCG00750	rps11	ATCG00750	-1.02918	0.00399793	Down
AT1G64650	AT1G64650	AT1G64650	-1.02741	0.0490853	Down
AT1G11840	GLX1	AT1G11840	-1.0249	0.0159694	Down
AT5G24620	AT5G24620	AT5G24620	-1.02358	0.00329323	Down
AT1G58230	AT1G58230	AT1G58230	-1.0175	0.0167522	Down
AT5G19540	AT5G19540	AT5G19540	-1.00848	0.00779214	Down
AT1G55000	AT1G55000	AT1G55000	-1.00764	0.00760564	Down
AT4G13070	AT4G13070	AT4G13070	-1.00457	0.0412717	Down
AT3G26340	AT3G26340	AT3G26340	-1.00165	0.00061099	Down
AT3G01980	AT3G01980	AT3G01980	-1.00007	0.000786312	Down
