# Supplementary material for: Nuclear coat protein drives a multifaceted tolerance program during Turnip crinkle virus infection
Source: Research Square preprint supplement (doi:10.21203/rs.3.rs-8695072/v1), 2026-02-12
Supplement: Supplementary file 2 [file 44476ea8157b9dc4a64f83d5.xlsx]

## Sheet: sid2-2TCV_vs_Col0TCV
User_ID	symbol	ensembl_ID	sid2TCV-Col0TCV_log2FC	sid2TCV-Col0TCV_adjPval	Direction
AT4G29030	AT4G29030	AT4G29030	20.7832	1.01e-11	Up
AT4G19430	AT4G19430	AT4G19430	6.8118	0.00231266	Up
AT1G65390	PP2-A5	AT1G65390	5.53718	0.0263176	Up
AT5G62360	AT5G62360	AT5G62360	5.08019	0.0128547	Up
AT4G37730	bZIP7	AT4G37730	4.7992	0.0449483	Up
AT1G24020	MLP423	AT1G24020	4.38757	0.0450499	Up
AT1G53480	MRD1	AT1G53480	3.76836	0.00286545	Up
AT4G25470	CBF2	AT4G25470	3.56156	0.0363642	Up
AT1G72416	AT1G72416	AT1G72416	3.53576	0.0121075	Up
AT5G66800	AT5G66800	AT5G66800	3.3896	0.0496149	Up
AT3G63440	CKX6	AT3G63440	3.23282	0.00978757	Up
AT4G17470	AT4G17470	AT4G17470	3.15896	0.0181074	Up
AT3G50890	HB28	AT3G50890	3.13038	0.0263288	Up
AT3G21310	AT3G21310	AT3G21310	2.98582	0.0257158	Up
AT1G28390	AT1G28390	AT1G28390	2.67332	0.0496149	Up
AT4G21065	AT4G21065	AT4G21065	2.55728	0.0417133	Up
AT3G57160	AT3G57160	AT3G57160	2.4435	0.00192392	Up
AT1G56300	AT1G56300	AT1G56300	2.28549	0.0493993	Up
AT2G04032	ZIP7	AT2G04032	2.2827	0.0448136	Up
AT1G73590	PIN1	AT1G73590	2.24166	0.0412216	Up
AT5G65925	AT5G65925	AT5G65925	2.0807	0.0282335	Up
AT1G58270	ZW9	AT1G58270	2.0317	0.0173588	Up
AT5G06270	AT5G06270	AT5G06270	2.01051	0.025563	Up
AT4G30660	AT4G30660	AT4G30660	1.95056	0.00231266	Up
AT3G41979	AT2G01020 AT3G41979	AT3G41979	1.92233	0.00188328	Up
AT2G01020	AT2G01020 AT2G01020	AT2G01020	1.90238	0.00193496	Up
AT5G51440	AT5G51440	AT5G51440	1.88836	0.01507	Up
AT3G06355	AT3G06355	AT3G06355	1.7379	0.00630024	Up
AT5G48470	AT5G48470	AT5G48470	1.65456	0.0181074	Up
AT1G78600	LZF1	AT1G78600	1.62033	0.0250315	Up
AT5G59000	AT5G59000	AT5G59000	1.55364	0.0348278	Up
AT4G20780	CML42	AT4G20780	1.51888	0.0486387	Up
AT3G25710	BHLH32	AT3G25710	1.45203	0.0285087	Up
AT2G35880	AT2G35880	AT2G35880	1.25782	0.038365	Up
AT5G39790	AT5G39790	AT5G39790	1.20472	0.0462917	Up
AT3G12920	BRG3	AT3G12920	1.15295	0.0182618	Up
AT1G75800	AT1G75800	AT1G75800	1.01891	0.0328404	Up
AT3G07255	AT3G07255	AT3G07255	-25.9996	7.03e-08	Down
AT4G22490	AT4G22490	AT4G22490	-17.9171	1.91e-05	Down
AT2G26400	ARD3	AT2G26400	-9.63634	0.00185067	Down
AT1G14880	PCR1	AT1G14880	-8.60202	9.92e-08	Down
AT2G14610	PR1	AT2G14610	-8.33479	7.03e-08	Down
AT3G11340	UGT76B1	AT3G11340	-8.25844	0.0193389	Down
AT2G44240	AT2G44240	AT2G44240	-7.55491	0.00477308	Down
AT5G59220	HAI1	AT5G59220	-6.98234	0.000549554	Down
AT5G22570	WRKY38	AT5G22570	-6.81701	0.000231258	Down
AT4G10500	AT4G10500	AT4G10500	-6.6463	0.000221124	Down
AT4G35180	LHT7	AT4G35180	-6.57426	0.00973695	Down
AT5G03350	AT5G03350	AT5G03350	-6.22601	0.000221124	Down
AT2G14560	LURP1	AT2G14560	-5.87345	0.000231258	Down
AT4G13890	EDA36	AT4G13890	-5.80807	0.0289746	Down
AT1G02450	NIMIN1	AT1G02450	-5.68701	0.00703761	Down
AT3G01420	DOX1	AT3G01420	-5.59674	0.048196	Down
AT3G28510	AT3G28510	AT3G28510	-5.34161	0.0175719	Down
AT1G74710	EDS16	AT1G74710	-5.27153	0.000720356	Down
AT2G40750	WRKY54	AT2G40750	-4.63968	0.000221124	Down
AT2G26390	AT2G26390	AT2G26390	-4.63847	0.0428808	Down
AT2G05440	GRP9	AT2G05440	-4.63017	0.0348278	Down
AT5G64810	WRKY51	AT5G64810	-4.5444	0.0226583	Down
AT2G14620	XTH10	AT2G14620	-4.50769	0.0328404	Down
AT1G03850	GRXS13	AT1G03850	-4.43845	0.0132445	Down
AT3G22231	PCC1	AT3G22231	-4.29421	0.00448196	Down
AT1G33055	AT1G33055	AT1G33055	-4.27328	0.0462917	Down
AT1G74700	TRZ1	AT1G74700	-4.25426	0.0101655	Down
AT2G44380	AT2G44380	AT2G44380	-4.25101	0.0250315	Down
AT3G22235	AT3G22235	AT3G22235	-3.83509	0.00502199	Down
AT3G57260	BGL2	AT3G57260	-3.74563	0.038365	Down
AT3G22240	AT3G22240	AT3G22240	-3.69639	0.00753074	Down
AT3G25882	NIMIN-2	AT3G25882	-3.68761	0.0175719	Down
AT1G69490	NAP	AT1G69490	-3.53264	0.0368072	Down
AT1G59920	AT1G59920	AT1G59920	-3.36304	0.00253328	Down
AT1G02610	AT1G02610	AT1G02610	-3.333	0.01507	Down
AT1G59930	AT1G59930	AT1G59930	-3.2219	0.00172319	Down
AT1G16510	AT1G16510	AT1G16510	-3.05629	0.00692125	Down
AT4G27450	AT4G27450	AT4G27450	-2.98879	0.00778794	Down
AT3G56400	WRKY70	AT3G56400	-2.94627	0.025563	Down
AT2G20670	AT2G20670	AT2G20670	-2.88355	0.00448196	Down
AT1G23730	BCA3	AT1G23730	-2.84888	0.0175719	Down
AT2G36080	ABS2	AT2G36080	-2.81948	0.000427467	Down
AT4G37520	AT4G37520	AT4G37520	-2.81825	0.0209943	Down
AT4G37150	MES9	AT4G37150	-2.81782	0.00849935	Down
AT1G29640	AT1G29640	AT1G29640	-2.63153	0.0313097	Down
AT5G56550	OXS3	AT5G56550	-2.62539	0.00132017	Down
AT1G70290	TPS8	AT1G70290	-2.60114	0.000720356	Down
AT5G40720	AT5G40720	AT5G40720	-2.54881	0.0435032	Down
AT2G30550	AT2G30550	AT2G30550	-2.47941	0.01507	Down
AT5G39050	PMAT1	AT5G39050	-2.36232	0.0250315	Down
AT5G15860	PCME	AT5G15860	-2.31814	0.00251325	Down
AT5G07440	GDH2	AT5G07440	-2.31256	0.01507	Down
AT2G32530	CSLB03	AT2G32530	-2.28035	0.00978757	Down
AT4G28390	AAC3	AT4G28390	-2.22018	0.0379627	Down
AT3G07350	F21O3.6	AT3G07350	-2.20015	0.00611954	Down
AT5G01850	AT5G01850	AT5G01850	-2.17866	0.00973695	Down
AT1G49500	AT1G49500	AT1G49500	-2.14324	0.0309335	Down
AT1G23020	FRO3	AT1G23020	-2.12902	0.0348278	Down
AT5G21940	AT5G21940	AT5G21940	-2.12698	0.0412216	Down
AT1G52800	AT1G52800	AT1G52800	-2.11421	0.0226583	Down
AT1G23390	AT1G23390	AT1G23390	-2.0917	0.00282364	Down
AT5G47560	TDT	AT5G47560	-2.04278	0.0496149	Down
AT2G40200	AT2G40200	AT2G40200	-2.03742	0.0462917	Down
AT1G21400	AT1G21400	AT1G21400	-2.01706	0.0361215	Down
AT1G72770	HAB1	AT1G72770	-1.99946	0.00148681	Down
AT5G45800	MEE62	AT5G45800	-1.94493	0.0128655	Down
AT3G18773	AT3G18773	AT3G18773	-1.88806	0.0428808	Down
AT3G59940	AT3G59940	AT3G59940	-1.86468	0.00502199	Down
AT4G16690	MES16	AT4G16690	-1.80722	0.0209718	Down
AT4G32870	AT4G32870	AT4G32870	-1.76719	0.0379627	Down
AT4G16370	OPT3	AT4G16370	-1.74966	0.01507	Down
AT1G68570	AT1G68570	AT1G68570	-1.72496	0.026035	Down
AT2G37970	SOUL-1	AT2G37970	-1.65752	0.0308461	Down
AT1G79520	AT1G79520	AT1G79520	-1.62829	0.01507	Down
AT5G18630	AT5G18630	AT5G18630	-1.62405	0.0289746	Down
AT1G21410	SKP2A	AT1G21410	-1.60511	0.0181074	Down
AT1G27290	AT1G27290	AT1G27290	-1.57851	0.0452433	Down
AT1G78830	AT1G78830	AT1G78830	-1.57823	0.0462917	Down
AT4G28290	AT4G28290	AT4G28290	-1.55781	0.0379627	Down
AT2G40520	AT2G40520	AT2G40520	-1.52351	0.0173588	Down
AT1G08570	ACHT4	AT1G08570	-1.47734	0.0175719	Down
AT3G03990	AT3G03990	AT3G03990	-1.39483	0.038807	Down
AT5G18670	BMY3	AT5G18670	-1.33227	0.0493993	Down
AT2G35940	BLH1	AT2G35940	-1.32382	0.025563	Down
AT2G32540	CSLB04	AT2G32540	-1.31113	0.041778	Down
AT1G23090	AST91	AT1G23090	-1.25239	0.0379627	Down
AT1G64500	AT1G64500	AT1G64500	-1.21004	0.00753074	Down
AT4G00750	AT4G00750	AT4G00750	-1.1848	0.0462917	Down
AT3G07720	AT3G07720	AT3G07720	-1.1719	0.0379627	Down
AT1G01060	LHY	AT1G01060	-1.13987	0.000720356	Down
AT1G35670	CDPK2	AT1G35670	-1.077	0.0175719	Down
AT5G59750	RIBA3	AT5G59750	-1.05253	0.041778	Down
AT5G27600	LACS7	AT5G27600	-1.03806	0.0478818	Down

## Sheet: rbohDTCV_vs_Col0TCV
User_ID	symbol	ensembl_ID	rbohDTCV-Col0TCV_log2FC	rbohDTCV-Col0TCV_adjPval	Direction
AT4G29030	AT4G29030	AT4G29030	18.2178	4.34e-08	Up
AT4G25470	CBF2	AT4G25470	4.86133	8.12e-05	Up
AT5G59320	LTP3	AT5G59320	4.60559	0.000598094	Up
AT4G03295	AT4G03295	AT4G03295	4.54985	0.0437575	Up
AT5G59310	LTP4	AT5G59310	4.33219	0.0289166	Up
AT3G04155	AT3G04155	AT3G04155	3.88044	0.0471249	Up
AT5G46295	AT5G46295	AT5G46295	3.55801	0.0174599	Up
AT1G70910	DEP	AT1G70910	3.34224	0.0165936	Up
AT4G24570	DIC2	AT4G24570	3.31449	0.00575969	Up
AT5G55507	AT5G55507	AT5G55507	3.27426	0.0340327	Up
AT3G10930	AT3G10930	AT3G10930	3.25673	0.0172904	Up
AT1G70185	AT1G70185	AT1G70185	3.22141	0.0010977	Up
AT1G35140	PHI-1	AT1G35140	3.21085	0.00692359	Up
AT4G08805	AT4G08805	AT4G08805	3.18802	0.0308225	Up
AT1G05853	U5.5	AT1G05853	3.10166	0.0471249	Up
AT5G02055	AT5G02055	AT5G02055	3.01759	0.0129496	Up
AT5G15533	AT5G15533	AT5G15533	2.98112	0.0363383	Up
AT3G03430	AT3G03430	AT3G03430	2.9779	0.0241079	Up
AT4G08950	EXO	AT4G08950	2.90765	0.00159671	Up
AT2G20835	AT2G20835	AT2G20835	2.88876	0.00785703	Up
AT4G27280	AT4G27280	AT4G27280	2.8535	0.00664779	Up
AT1G68526	AT1G68526	AT1G68526	2.82916	0.037614	Up
AT3G06900	U4.2	AT3G06900	2.8044	0.0443121	Up
AT5G08445	AT5G08445	AT5G08445	2.79503	0.0226351	Up
AT1G32928	AT1G32928	AT1G32928	2.74986	0.040416	Up
AT3G02410	ICME-LIKE2	AT3G02410	2.73189	0.00841441	Up
AT5G08150	SOB5	AT5G08150	2.73185	0.0241079	Up
AT3G11640	AT3G11640	AT3G11640	2.69562	0.0384122	Up
AT1G01810	AT1G01810	AT1G01810	2.66611	0.023921	Up
AT4G25480	DREB1A	AT4G25480	2.5556	0.0118092	Up
AT5G24030	SLAH3	AT5G24030	2.5488	0.000646086	Up
AT1G05057	U2.14	AT1G05057	2.53624	0.00289638	Up
AT1G69900	AT1G69900	AT1G69900	2.51887	0.00446364	Up
AT3G23170	AT3G23170	AT3G23170	2.50602	0.00023348	Up
AT5G42965	AT5G42965	AT5G42965	2.47324	0.0345638	Up
AT1G73540	NUDT21	AT1G73540	2.43089	0.0406058	Up
AT3G41761	AT3G41761	AT3G41761	2.40951	0.0305019	Up
AT3G57645	U2.2	AT3G57645	2.39459	0.0140876	Up
AT3G54810	BME3	AT3G54810	2.37554	2.79e-08	Up
AT1G72240	AT1G72240	AT1G72240	2.36966	0.00234747	Up
AT1G66400	CML23	AT1G66400	2.34001	0.00620214	Up
AT3G13437	AT3G13437	AT3G13437	2.28704	0.0221559	Up
AT4G03995	U2.9	AT4G03995	2.27599	0.000365639	Up
AT4G04745	AT4G04745	AT4G04745	2.231	0.0164056	Up
AT4G26488	AT4G26488	AT4G26488	2.2273	0.00615071	Up
AT4G25980	AT4G25980	AT4G25980	2.22679	0.00370103	Up
AT5G65390	AGP7	AT5G65390	2.20728	0.0338735	Up
AT5G46115	AT5G46115	AT5G46115	2.16286	0.0202024	Up
AT3G03125	AT3G03125	AT3G03125	2.13755	0.012379	Up
AT2G17230	EXL5	AT2G17230	2.10905	0.00433926	Up
AT2G41450	AT2G41450	AT2G41450	2.09227	0.0326043	Up
AT5G09065	AT5G09065	AT5G09065	2.08342	0.0218086	Up
AT4G31398	AT4G31398	AT4G31398	2.07357	0.0443558	Up
AT3G19680	AT3G19680	AT3G19680	2.05585	0.000101738	Up
AT4G36930	SPT	AT4G36930	2.03309	0.027966	Up
AT2G04145	AT2G04145	AT2G04145	2.0278	0.0303646	Up
AT5G40730	AGP24	AT5G40730	2.02183	0.0182984	Up
AT3G56960	PIP5K4	AT3G56960	1.97325	0.0477773	Up
AT5G01915	ath-MIR5629	AT5G01915	1.9594	0.0279592	Up
AT3G62690	ATL5 AT3G62690	AT3G62690	1.95842	0.00834898	Up
AT4G02760	AT4G02760	AT4G02760	1.95382	0.0174599	Up
AT5G14890	AT5G14890	AT5G14890	1.93649	0.0202024	Up
AT5G53902	U3B	AT5G53902	1.93184	0.00192087	Up
AT4G04565	AT4G04565	AT4G04565	1.89052	0.0378582	Up
AT2G30930	AT2G30930	AT2G30930	1.87097	0.0116765	Up
AT2G30230	AT2G30230	AT2G30230	1.8687	0.0488993	Up
AT5G37590	AT5G37590	AT5G37590	1.8618	0.0114566	Up
AT3G52115	GR1 AT3G52115	AT3G52115	1.86008	0.036329	Up
AT1G76090	SMT3	AT1G76090	1.85745	0.0150618	Up
AT1G61275	U12	AT1G61275	1.84255	0.0116297	Up
AT5G60335	AT5G60335	AT5G60335	1.82574	0.0463122	Up
AT3G45230	AT3G45230	AT3G45230	1.80314	0.0224456	Up
AT5G24510	AT5G24510	AT5G24510	1.77268	0.0303646	Up
AT1G22530	PATL2	AT1G22530	1.77052	0.00538551	Up
AT1G61860	AT1G61860	AT1G61860	1.75523	0.0053881	Up
AT3G06740	GATA15	AT3G06740	1.74356	0.00707549	Up
AT1G72790	AT1G72790	AT1G72790	1.74349	0.0172795	Up
AT4G21326	SBT3.12	AT4G21326	1.73422	0.0277703	Up
AT5G56230	PRA1.G2	AT5G56230	1.72834	0.0378582	Up
AT4G20780	CML42	AT4G20780	1.72562	0.00404554	Up
AT3G18530	AT3G18530	AT3G18530	1.70231	0.000827798	Up
AT1G24530	AT1G24530	AT1G24530	1.70119	0.0334444	Up
AT2G37510	AT2G37510	AT2G37510	1.69211	0.0153351	Up
AT5G52547	AT5G52547	AT5G52547	1.69146	0.0332346	Up
AT3G02390	AT3G02390	AT3G02390	1.67009	0.0325432	Up
AT3G17660	AGD15	AT3G17660	1.65868	0.0100561	Up
AT5G63690	AT5G63690	AT5G63690	1.65597	0.0258811	Up
AT5G37770	TCH2	AT5G37770	1.62604	0.0143551	Up
AT4G35060	HIPP25	AT4G35060	1.62215	0.046139	Up
AT5G54380	THE1	AT5G54380	1.61173	0.0307984	Up
AT3G56880	AT3G56880	AT3G56880	1.59987	0.0399001	Up
AT5G23870	AT5G23870	AT5G23870	1.59805	0.0178698	Up
AT5G57080	AT5G57080	AT5G57080	1.59756	0.022438	Up
AT5G14280	AT5G14280	AT5G14280	1.59367	0.0319785	Up
AT2G46572	AT2G46572	AT2G46572	1.58001	0.0286415	Up
AT4G31550	WRKY11	AT4G31550	1.57819	0.0358214	Up
AT5G52540	AT5G52540	AT5G52540	1.54871	0.0310158	Up
AT3G28200	AT3G28200	AT3G28200	1.53698	0.00309367	Up
AT3G59068	AT3G59068	AT3G59068	1.53657	0.0239018	Up
AT3G18880	AT3G18880	AT3G18880	1.53108	0.0453913	Up
AT4G31030	AT4G31030	AT4G31030	1.51897	0.0228341	Up
AT2G47440	AT2G47440	AT2G47440	1.50719	0.0255221	Up
AT2G17430	MLO7	AT2G17430	1.47984	0.0400814	Up
AT1G51940	LYK3	AT1G51940	1.46767	0.0492057	Up
AT1G49245	AT1G49245	AT1G49245	1.43884	1.31e-05	Up
AT5G45820	CIPK20	AT5G45820	1.4041	0.0247607	Up
AT1G78600	LZF1	AT1G78600	1.39299	0.0293331	Up
AT1G23030	AT1G23030	AT1G23030	1.38518	0.0244225	Up
AT1G20630	CAT1	AT1G20630	1.37618	0.0440062	Up
AT1G61280	AT1G61280	AT1G61280	1.36095	0.0489782	Up
AT4G02740	AT4G02740	AT4G02740	1.35848	0.00239137	Up
AT5G44060	AT5G44060	AT5G44060	1.35729	0.0378582	Up
AT2G39870	AT2G39870	AT2G39870	1.35728	0.0481437	Up
AT5G09595	AT5G09595	AT5G09595	1.35211	0.0199431	Up
AT4G15800	RALFL33	AT4G15800	1.34986	0.0041651	Up
AT2G14460	AT2G14460	AT2G14460	1.33532	0.0111314	Up
AT5G54910	AT5G54910	AT5G54910	1.32179	0.0408713	Up
AT4G26810	AT4G26810	AT4G26810	1.31956	0.000721461	Up
AT5G11000	AT5G11000	AT5G11000	1.309	0.00192087	Up
AT1G08457	AT1G08457	AT1G08457	1.30415	0.012379	Up
AT2G35880	AT2G35880	AT2G35880	1.30386	0.00805512	Up
AT3G17630	CHX19	AT3G17630	1.26785	0.0485586	Up
AT5G67350	AT5G67350	AT5G67350	1.26368	0.0355711	Up
AT2G41440	AT2G41440	AT2G41440	1.26306	0.0244873	Up
AT2G46160	AT2G46160	AT2G46160	1.25611	0.0236065	Up
AT3G52420	OEP7	AT3G52420	1.24122	9.18e-09	Up
AT5G52545	AT5G52545	AT5G52545	1.23166	0.0310158	Up
AT5G08335	ATSTE14B	AT5G08335	1.22966	1.42e-05	Up
AT2G46670	AT2G46670	AT2G46670	1.22229	0.00310403	Up
AT1G31460	AT1G31460	AT1G31460	1.21699	0.0221053	Up
AT1G19990	AT1G19990	AT1G19990	1.21389	0.0453489	Up
AT5G09175	AT5G09175	AT5G09175	1.20795	0.0164162	Up
AT3G28956	AT3G28956	AT3G28956	1.19722	0.000946662	Up
AT5G20885	AT5G20885	AT5G20885	1.19018	0.000180514	Up
AT1G22403	AT1G22403	AT1G22403	1.18909	0.0087552	Up
AT2G26975	COPT6	AT2G26975	1.17968	0.00547076	Up
AT3G62660	GATL7	AT3G62660	1.17174	0.00834898	Up
AT5G47430	AT5G47430	AT5G47430	1.16341	0.00343351	Up
AT2G36410	AT2G36410	AT2G36410	1.16299	0.00912256	Up
AT5G28300	AT5G28300	AT5G28300	1.15699	0.0356398	Up
AT4G08425	AT4G08425	AT4G08425	1.15459	0.036329	Up
AT1G28070	AT1G28070	AT1G28070	1.15153	0.0069298	Up
AT4G39160	AT4G39160	AT4G39160	1.14532	0.0422953	Up
AT1G09487	AT1G09487	AT1G09487	1.14069	0.0336571	Up
AT3G19508	AT3G19508	AT3G19508	1.13037	0.0147103	Up
AT5G43730	AT5G43730	AT5G43730	1.12916	0.0416576	Up
AT5G05380	PRA1.B3	AT5G05380	1.1291	0.0345638	Up
AT5G67320	HOS15	AT5G67320	1.1286	0.00763244	Up
AT5G08170	EMB1873	AT5G08170	1.11634	0.000531874	Up
AT3G12020	AT3G12020	AT3G12020	1.09989	0.00218899	Up
AT1G80810	AT1G80810	AT1G80810	1.09891	0.0336737	Up
AT5G17580	AT5G17580	AT5G17580	1.09337	0.0461819	Up
AT2G34770	FAH1 AT2G34770	AT2G34770	1.076	0.000875652	Up
AT2G34450	AT2G34450	AT2G34450	1.06464	0.00838283	Up
AT4G03490	AT4G03490	AT4G03490	1.05974	0.000381466	Up
AT3G59840	AT3G59840	AT3G59840	1.05899	0.0110111	Up
AT1G22882	AT1G22882	AT1G22882	1.05671	0.027756	Up
AT5G58530	AT5G58530	AT5G58530	1.04893	0.0492057	Up
AT1G18030	AT1G18030	AT1G18030	1.04062	0.0495683	Up
AT2G43745	AT2G43745	AT2G43745	1.03493	0.00715766	Up
AT4G21720	AT4G21720	AT4G21720	1.03184	0.0200226	Up
AT2G44670	AT2G44670	AT2G44670	1.01007	0.00511718	Up
AT3G03010	AT3G03010	AT3G03010	1.00521	0.0188464	Up
AT4G24805	AT4G24805	AT4G24805	1.00429	0.0338298	Up
AT3G09545	AT3G09545	AT3G09545	-24.1917	1.09e-05	Down
AT4G22490	AT4G22490	AT4G22490	-18.0028	2.67e-06	Down
AT4G06598	AT4G06598	AT4G06598	-5.15348	0.00502484	Down
AT3G13405	ath-MIR169a	AT3G13405	-4.45811	0.041655	Down
AT4G14690	ELIP2	AT4G14690	-3.4444	0.00595832	Down
AT3G62950	AT3G62950	AT3G62950	-3.42947	0.00264027	Down
AT3G44990	XTH31	AT3G44990	-3.31681	0.0477278	Down
AT5G02260	EXPA9	AT5G02260	-3.24029	0.000101738	Down
AT5G05270	CHIL	AT5G05270	-3.06549	0.0282829	Down
AT3G57157	AT3G57157	AT3G57157	-2.96591	0.0310068	Down
AT3G62930	AT3G62930	AT3G62930	-2.44385	0.0296523	Down
AT3G16410	NSP4	AT3G16410	-2.26054	0.00773364	Down
AT2G26750	AT2G26750	AT2G26750	-2.17515	0.000218266	Down
AT5G56550	OXS3	AT5G56550	-2.01941	0.00912256	Down
AT4G37480	AT4G37480	AT4G37480	-2.01357	0.0115301	Down
AT3G07350	F21O3.6	AT3G07350	-2.00768	0.00419963	Down
ATCG00480	atpB	ATCG00480	-1.86366	6.14e-05	Down
AT2G37180	RD28	AT2G37180	-1.85679	0.022438	Down
ATCG00710	psbH	ATCG00710	-1.82952	0.0254169	Down
AT2G11225	AT2G11225	AT2G11225	-1.78968	0.017111	Down
AT5G05790	AT5G05790	AT5G05790	-1.77507	0.0429366	Down
ATCG00560	psbL	ATCG00560	-1.77328	0.00129761	Down
AT2G42750	AT2G42750	AT2G42750	-1.75531	0.000417917	Down
AT1G22540	AT1G22540	AT1G22540	-1.74455	0.0451843	Down
AT5G59080	AT5G59080	AT5G59080	-1.66602	0.0120399	Down
AT5G51370	AT5G51370	AT5G51370	-1.60396	0.0422874	Down
AT4G16008	AT4G16008	AT4G16008	-1.51961	0.0281442	Down
AT1G08830	CSD1	AT1G08830	-1.48153	0.0366867	Down
AT5G44530	AT5G44530	AT5G44530	-1.47931	0.0316449	Down
AT5G56600	PRF3	AT5G56600	-1.45906	0.00491482	Down
AT4G16250	PHYD	AT4G16250	-1.43617	0.0447266	Down
AT4G36910	LEJ2	AT4G36910	-1.41215	0.0481135	Down
AT2G34655	AT2G34655	AT2G34655	-1.37065	0.0200996	Down
AT4G20070	AAH	AT4G20070	-1.35653	0.0264558	Down
AT2G24590	RSZ22a	AT2G24590	-1.32161	0.0243182	Down
AT4G13100	AT4G13100	AT4G13100	-1.29403	0.0408713	Down
ATCG01090	ndhI	ATCG01090	-1.25796	0.0280653	Down
AT4G17840	AT4G17840	AT4G17840	-1.25502	0.0286081	Down
AT3G28070	UMAMIT46	AT3G28070	-1.23403	0.0367892	Down
AT5G44000	AT5G44000	AT5G44000	-1.22986	0.000877433	Down
AT5G39530	AT5G39530	AT5G39530	-1.22349	0.0305836	Down
AT1G79430	APL	AT1G79430	-1.22343	0.0340327	Down
AT4G02210	AT4G02210	AT4G02210	-1.21378	0.00349272	Down
AT2G26690	AT2G26690	AT2G26690	-1.21222	0.0244225	Down
AT5G16650	AT5G16650	AT5G16650	-1.2018	3.05e-05	Down
AT2G14255	AT2G14255	AT2G14255	-1.19356	0.00822969	Down
AT5G56180	ARP8	AT5G56180	-1.17865	0.0493796	Down
AT5G24930	COL4	AT5G24930	-1.17639	0.000151283	Down
AT5G22090	AT5G22090	AT5G22090	-1.17061	0.0400814	Down
AT5G58870	ftsh9	AT5G58870	-1.11798	0.000383605	Down
AT5G40160	EMB506	AT5G40160	-1.11378	0.0296523	Down
AT5G37290	AT5G37290	AT5G37290	-1.11202	0.0172795	Down
AT5G48930	HCT	AT5G48930	-1.11121	0.0158039	Down
AT4G13550	AT4G13550	AT4G13550	-1.11019	0.0229493	Down
AT1G26640	AT1G26640	AT1G26640	-1.1081	0.0174657	Down
AT1G65230	AT1G65230	AT1G65230	-1.10341	0.0380707	Down
AT1G50940	ETFALPHA	AT1G50940	-1.10124	0.00525979	Down
AT3G04240	SEC	AT3G04240	-1.07865	0.0188464	Down
AT5G49230	HRB1	AT5G49230	-1.07608	0.00142977	Down
AT4G21350	PUB8	AT4G21350	-1.06713	0.00763244	Down
AT5G24350	AT5G24350	AT5G24350	-1.06386	0.00502823	Down
AT3G52526	AT3G52526	AT3G52526	-1.03866	0.00694608	Down
AT1G52510	AT1G52510	AT1G52510	-1.03513	0.0435636	Down
AT2G46700	CRK3 AT2G46700	AT2G46700	-1.02908	0.0487596	Down
AT5G07020	AT5G07020	AT5G07020	-1.0249	0.00288465	Down
AT5G49950	AT5G49950	AT5G49950	-1.01695	0.0191099	Down
AT4G29070	AT4G29070	AT4G29070	-1.01662	0.027966	Down
AT3G13740	AT3G13740	AT3G13740	-1.01486	0.00120033	Down
ATCG00550	psbJ	ATCG00550	-1.01288	0.0171413	Down
AT1G66540	AT1G66540	AT1G66540	-1.01148	0.0478952	Down
AT5G13410	AT5G13410	AT5G13410	-1.00686	0.0370428	Down
AT5G57350	HA3	AT5G57350	-1.00569	0.00692359	Down
AT1G58230	AT1G58230	AT1G58230	-1.00053	0.0153348	Down

## Sheet: rbohFTCV_vs_Col0TCV
User_ID	symbol	ensembl_ID	rbohFTCV-Col0TCV_log2FC	rbohFTCV-Col0TCV_adjPval	Direction
AT4G29030	AT4G29030	AT4G29030	18.2225	2.58e-08	Up
AT3G59620	AT3G59620	AT3G59620	6.77682	0.0161771	Up
AT1G70270	AT1G70270	AT1G70270	6.43221	0.00614747	Up
AT5G04455	U1.8	AT5G04455	5.77276	0.0059937	Up
AT4G19430	AT4G19430	AT4G19430	5.50391	0.00745009	Up
AT1G06667	AT1G06667	AT1G06667	5.28405	0.0214559	Up
AT1G19373	AT1G19373	AT1G19373	5.03002	0.00846451	Up
AT4G37730	bZIP7	AT4G37730	4.92681	0.00799645	Up
AT4G06320	AT4G06320	AT4G06320	4.75265	0.0280567	Up
AT5G04315	U1.9	AT5G04315	4.60459	0.0348986	Up
AT5G04325	AT5G04325	AT5G04325	4.60459	0.0348986	Up
AT5G50260	CEP1	AT5G50260	4.31162	0.00706969	Up
AT1G12940	NRT2.5	AT1G12940	4.26131	0.0251196	Up
AT1G04897	U4.6	AT1G04897	3.6093	0.0470133	Up
AT1G66390	MYB90	AT1G66390	3.45911	0.0440769	Up
AT2G38465	AT2G38465	AT2G38465	3.34548	0.00515677	Up
AT5G12030	HSP17.6A	AT5G12030	3.17406	0.0381077	Up
AT3G06900	U4.2	AT3G06900	2.96682	0.0229596	Up
AT3G03430	AT3G03430	AT3G03430	2.96092	0.0202388	Up
AT3G57980	AT3G57980	AT3G57980	2.96047	0.0325527	Up
AT1G66380	MYB114	AT1G66380	2.83394	0.0415524	Up
AT2G34650	PID	AT2G34650	2.83207	0.00161909	Up
AT2G45080	cycp3;1	AT2G45080	2.82961	0.0174416	Up
AT5G15533	AT5G15533	AT5G15533	2.79715	0.0479048	Up
AT3G56705	U2.6 AT3G56705	AT3G56705	2.78798	2.91e-05	Up
ATCG00250	ATCG00250	ATCG00250	2.78608	0.0292677	Up
AT1G68526	AT1G68526	AT1G68526	2.71201	0.0411547	Up
AT5G08445	AT5G08445	AT5G08445	2.63327	0.029926	Up
AT1G05057	U2.14	AT1G05057	2.60045	0.00154145	Up
AT5G20940	AT5G20940	AT5G20940	2.53053	0.0489022	Up
AT4G31875	AT4G31875	AT4G31875	2.4606	0.0169076	Up
AT1G62370	AT1G62370	AT1G62370	2.39948	0.0368416	Up
AT2G28250	NCRK	AT2G28250	2.3294	0.0216062	Up
AT3G57645	U2.2	AT3G57645	2.32824	0.0141953	Up
AT5G42965	AT5G42965	AT5G42965	2.32215	0.0444648	Up
AT5G09065	AT5G09065	AT5G09065	2.3056	0.00581283	Up
AT5G02420	AT5G02420	AT5G02420	2.29307	0.0134944	Up
AT1G68600	AT1G68600	AT1G68600	2.28975	0.0223708	Up
AT1G04733	U2.11	AT1G04733	2.25637	0.00111384	Up
AT4G03995	U2.9	AT4G03995	2.24637	0.000382449	Up
AT3G03460	AT3G03460	AT3G03460	2.20467	0.0119523	Up
AT5G56980	AT5G56980	AT5G56980	2.20456	0.0162719	Up
AT5G16570	GLN1;4	AT5G16570	2.17461	0.034716	Up
AT3G58520	AT3G58520	AT3G58520	2.14813	0.0472533	Up
AT2G06615	AT2G06615	AT2G06615	2.1037	0.0459869	Up
AT1G06475	AT1G06475	AT1G06475	2.09122	0.0333046	Up
AT2G07715	AT2G07715	AT2G07715	2.07084	0.0129586	Up
AT2G41450	AT2G41450	AT2G41450	2.06691	0.0292897	Up
AT1G25180	AT1G25180	AT1G25180	2.05666	0.035766	Up
AT1G24851	AT1G24851	AT1G24851	2.05665	0.0333465	Up
AT1G09800	AT1G09800	AT1G09800	2.05271	0.000606897	Up
AT2G15830	AT2G15830	AT2G15830	2.01842	0.0127196	Up
AT5G43620	AT5G43620	AT5G43620	1.98938	0.0131248	Up
AT1G18075	ath-MIR159b	AT1G18075	1.96199	0.013207	Up
AT3G52115	GR1 AT3G52115	AT3G52115	1.91888	0.0229918	Up
AT1G15772	AT1G15772	AT1G15772	1.88567	0.0346302	Up
AT1G58270	ZW9	AT1G58270	1.86362	0.00932211	Up
AT5G02090	AT5G02090	AT5G02090	1.86278	0.0452902	Up
AT3G62690	ATL5 AT3G62690	AT3G62690	1.80902	0.015471	Up
AT1G28230	PUP1	AT1G28230	1.80511	0.0153743	Up
AT1G77145	AT1G77145	AT1G77145	1.76993	0.0387404	Up
AT2G20410	AT2G20410	AT2G20410	1.7656	1.45e-06	Up
AT5G37590	AT5G37590	AT5G37590	1.75715	0.0152631	Up
AT1G66730	LIG6	AT1G66730	1.73233	0.0108313	Up
AT3G25290	AT3G25290	AT3G25290	1.71845	0.0417693	Up
AT4G25980	AT4G25980	AT4G25980	1.71522	0.0379548	Up
AT5G62865	AT5G62865	AT5G62865	1.68815	0.0359025	Up
AT2G45310	GAE4	AT2G45310	1.65721	0.0314733	Up
AT1G72840	AT1G72840	AT1G72840	1.62555	0.0434131	Up
AT5G53902	U3B	AT5G53902	1.62391	0.0118744	Up
AT5G52547	AT5G52547	AT5G52547	1.61945	0.0368416	Up
AT1G49530	GGPS6	AT1G49530	1.58494	0.020274	Up
AT2G17430	MLO7	AT2G17430	1.57912	0.0191381	Up
AT1G72440	EDA25	AT1G72440	1.56697	0.00953508	Up
AT1G61275	U12	AT1G61275	1.55895	0.0413574	Up
AT5G54075	U3D	AT5G54075	1.53809	0.0270168	Up
AT1G02705	AT1G02705	AT1G02705	1.51031	0.0431454	Up
AT4G19020	CMT2	AT4G19020	1.50005	0.0229918	Up
AT2G37585	AT2G37585	AT2G37585	1.48811	0.02632	Up
AT4G39364	AT4G39364	AT4G39364	1.47004	0.0289485	Up
AT2G28350	ARF10	AT2G28350	1.43258	0.0208475	Up
AT2G28550	RAP2.7	AT2G28550	1.42866	0.0360855	Up
AT1G09250	AT1G09250	AT1G09250	1.42525	0.000430716	Up
AT4G16920	AT4G16920	AT4G16920	1.38971	0.0396704	Up
AT1G61860	AT1G61860	AT1G61860	1.38528	0.0400149	Up
AT3G19380	PUB25	AT3G19380	1.38086	0.0300148	Up
AT2G46670	AT2G46670	AT2G46670	1.36895	0.000405293	Up
AT1G73760	AT1G73760	AT1G73760	1.35371	0.00188507	Up
AT1G63230	AT1G63230	AT1G63230	1.3413	0.0311909	Up
AT3G17630	CHX19	AT3G17630	1.32013	0.029926	Up
AT5G09595	AT5G09595	AT5G09595	1.2699	0.0274066	Up
AT4G08425	AT4G08425	AT4G08425	1.26368	0.0129586	Up
AT1G31350	KUF1	AT1G31350	1.24068	0.0174416	Up
AT4G17085	AT4G17085	AT4G17085	1.24034	0.00209515	Up
ATMG01190	atp1	ATMG01190	1.24032	0.0286763	Up
AT5G50160	FRO8	AT5G50160	1.23376	0.0216062	Up
AT5G43730	AT5G43730	AT5G43730	1.2286	0.0165915	Up
AT1G77470	RFC3 AT1G77470	AT1G77470	1.20363	0.0133146	Up
AT2G45680	TCP9	AT2G45680	1.19732	0.0247585	Up
AT3G13780	AT3G13780	AT3G13780	1.1613	0.0462905	Up
AT1G06800	PLA-I{gamma}1	AT1G06800	1.14666	0.00140124	Up
AT1G32630	AT1G32630	AT1G32630	1.14303	0.0105192	Up
AT3G51500	AT3G51500	AT3G51500	1.12757	0.00570668	Up
AT5G25060	RRC1	AT5G25060	1.11784	0.00119496	Up
AT5G67320	HOS15	AT5G67320	1.11437	0.00670627	Up
AT3G06210	AT3G06210	AT3G06210	1.11346	0.0348454	Up
AT3G19508	AT3G19508	AT3G19508	1.10006	0.0145143	Up
AT1G08973	AT1G08973	AT1G08973	1.09988	0.0234571	Up
AT3G11440	MYB65	AT3G11440	1.08051	0.0380696	Up
AT5G20200	AT5G20200	AT5G20200	1.07794	0.0210534	Up
AT5G12190	AT5G12190	AT5G12190	1.07442	0.000328514	Up
AT1G09027	AT1G09027	AT1G09027	1.07429	0.00116148	Up
AT1G80810	AT1G80810	AT1G80810	1.0688	0.0337391	Up
AT5G41800	AT5G41800	AT5G41800	1.0675	0.0357406	Up
AT5G20885	AT5G20885	AT5G20885	1.06736	0.00107065	Up
AT2G45315	AT2G45315	AT2G45315	1.06219	0.0372303	Up
AT1G78710	TBL42	AT1G78710	1.06049	0.0292677	Up
AT4G36080	AT4G36080	AT4G36080	1.04954	0.0374229	Up
AT3G12920	BRG3	AT3G12920	1.04909	0.0111939	Up
AT3G49725	AT3G49725	AT3G49725	1.04831	0.0363993	Up
AT5G47430	AT5G47430	AT5G47430	1.04038	0.00948894	Up
AT5G08170	EMB1873	AT5G08170	1.03721	0.00143125	Up
AT5G43740	AT5G43740	AT5G43740	1.03699	0.0234571	Up
AT5G17280	AT5G17280	AT5G17280	1.0217	7.55e-05	Up
AT5G18150	AT5G18150	AT5G18150	1.00789	0.0229358	Up
AT1G03190	UVH6	AT1G03190	1.00725	0.00843912	Up
AT2G23430	ICK1	AT2G23430	1.00707	0.0364619	Up
AT5G44430	PDF1.2c	AT5G44430	-7.70232	0.0135501	Down
AT5G44420	PDF1.2	AT5G44420	-6.06754	0.00408856	Down
AT2G05440	GRP9	AT2G05440	-5.51142	0.00165493	Down
AT2G26020	PDF1.2b	AT2G26020	-4.77246	0.02632	Down
AT3G15356	AT3G15356	AT3G15356	-4.13461	1.21e-05	Down
AT3G62950	AT3G62950	AT3G62950	-3.98191	0.000457168	Down
AT3G16530	AT3G16530	AT3G16530	-3.96009	8.28e-05	Down
AT3G62930	AT3G62930	AT3G62930	-3.71768	0.000621558	Down
AT1G31200	PP2-A9	AT1G31200	-3.4838	0.0411547	Down
AT2G15128	AT2G15128	AT2G15128	-3.43102	0.0179973	Down
AT3G05845	AT3G05845	AT3G05845	-3.37168	0.0197272	Down
AT3G18773	AT3G18773	AT3G18773	-3.10637	2.86e-06	Down
AT5G05960	AT5G05960	AT5G05960	-2.83303	0.0149359	Down
AT2G20670	AT2G20670	AT2G20670	-2.8266	0.00105725	Down
AT5G50915	AT5G50915	AT5G50915	-2.79152	0.0028271	Down
AT1G06830	AT1G06830	AT1G06830	-2.6949	0.0129529	Down
AT3G29631	AT3G29631	AT3G29631	-2.67379	8.71e-05	Down
AT1G78820	AT1G78820	AT1G78820	-2.62294	0.00667535	Down
AT3G45160	AT3G45160	AT3G45160	-2.55861	0.00493268	Down
AT3G07350	F21O3.6	AT3G07350	-2.52538	0.000130074	Down
AT2G25900	ATCTH	AT2G25900	-2.4294	0.00117027	Down
AT2G34620	AT2G34620	AT2G34620	-2.3953	0.00607937	Down
AT1G68190	BBX27	AT1G68190	-2.31864	0.00480433	Down
AT1G59920	AT1G59920	AT1G59920	-2.30996	0.0229918	Down
AT1G59930	AT1G59930	AT1G59930	-2.30844	0.0154275	Down
AT4G37800	XTH7	AT4G37800	-2.30172	0.0104946	Down
AT1G78850	AT1G78850	AT1G78850	-2.14457	0.00283697	Down
AT4G16008	AT4G16008	AT4G16008	-2.08943	0.000650851	Down
ATCG00560	psbL	ATCG00560	-2.06835	6.76e-05	Down
AT3G52840	BGAL2	AT3G52840	-2.0014	4.73e-07	Down
AT4G36910	LEJ2	AT4G36910	-1.88055	0.00370601	Down
AT2G44130	AT2G44130	AT2G44130	-1.87619	0.0142064	Down
AT1G64060	RBOH F	AT1G64060	-1.81758	0.00318372	Down
AT1G66480	AT1G66480	AT1G66480	-1.76705	0.0190961	Down
AT5G47610	AT5G47610	AT5G47610	-1.73638	0.0482556	Down
AT5G59080	AT5G59080	AT5G59080	-1.72319	0.00644227	Down
AT1G72810	AT1G72810	AT1G72810	-1.72307	0.0193769	Down
AT5G35790	G6PD1	AT5G35790	-1.64891	0.00510883	Down
AT4G16250	PHYD	AT4G16250	-1.64706	0.0169652	Down
AT1G15960	NRAMP6	AT1G15960	-1.63212	0.0467678	Down
AT1G19150	Lhca6	AT1G19150	-1.6127	0.0353819	Down
AT5G11420	AT5G11420	AT5G11420	-1.5557	0.029926	Down
AT4G32840	PFK6	AT4G32840	-1.5483	0.0364619	Down
AT5G02260	EXPA9	AT5G02260	-1.52124	0.0447125	Down
AT1G61240	AT1G61240	AT1G61240	-1.48591	0.0168622	Down
AT1G12900	GAPA-2	AT1G12900	-1.48358	0.00953508	Down
AT5G39530	AT5G39530	AT5G39530	-1.45379	0.00465595	Down
AT2G35260	AT2G35260	AT2G35260	-1.45289	1.75e-05	Down
AT3G27030	AT3G27030	AT3G27030	-1.45101	0.0110008	Down
ATCG00570	psbF	ATCG00570	-1.44419	0.0118017	Down
AT1G67590	AT1G67590	AT1G67590	-1.43746	0.0224028	Down
AT1G26130	AT1G26130	AT1G26130	-1.43315	0.0161771	Down
AT5G05580	FAD8	AT5G05580	-1.42826	0.0431578	Down
AT1G03030	AT1G03030	AT1G03030	-1.42136	0.00191763	Down
AT4G34500	AT4G34500	AT4G34500	-1.41954	0.0251196	Down
AT3G51600	LTP5	AT3G51600	-1.41887	0.0380876	Down
AT5G39080	AT5G39080	AT5G39080	-1.40312	0.013207	Down
AT4G01026	PYL7	AT4G01026	-1.39906	0.00995198	Down
AT1G18460	AT1G18460	AT1G18460	-1.39678	0.000466875	Down
AT2G22980	SCPL13	AT2G22980	-1.36916	0.0261299	Down
AT3G18280	AT3G18280	AT3G18280	-1.32973	0.0462905	Down
AT1G22850	AT1G22850	AT1G22850	-1.31407	0.000322931	Down
AT5G27290	AT5G27290	AT5G27290	-1.30819	0.0446619	Down
AT1G65230	AT1G65230	AT1G65230	-1.30585	0.00710733	Down
AT1G67050	AT1G67050	AT1G67050	-1.30522	0.0379548	Down
AT5G67420	LBD37	AT5G67420	-1.29241	0.0380696	Down
AT3G27770	AT3G27770	AT3G27770	-1.27582	9.42e-06	Down
AT2G01870	AT2G01870	AT2G01870	-1.27366	0.0090548	Down
AT2G47160	BOR1	AT2G47160	-1.27112	0.0396516	Down
AT2G30790	PSBP-2	AT2G30790	-1.264	0.0437811	Down
AT4G17245	AT4G17245	AT4G17245	-1.25076	0.0110708	Down
AT5G48730	AT5G48730	AT5G48730	-1.24797	0.00558042	Down
AT2G05100	LHCB2.1	AT2G05100	-1.24414	0.0499896	Down
AT5G02160	AT5G02160	AT5G02160	-1.23671	0.0431928	Down
AT1G07720	KCS3	AT1G07720	-1.21135	0.0379548	Down
AT4G13495	AT4G13495	AT4G13495	-1.21064	0.0206831	Down
AT1G18000	AT1G18000	AT1G18000	-1.20782	0.0324226	Down
AT3G15850	FAD5	AT3G15850	-1.2023	0.0335805	Down
AT1G44446	CH1	AT1G44446	-1.19769	9.28e-06	Down
AT4G22756	SMO1-2	AT4G22756	-1.18714	0.0374229	Down
AT1G17970	AT1G17970	AT1G17970	-1.18302	0.0162719	Down
AT1G18010	AT1G18010	AT1G18010	-1.16611	0.0388312	Down
AT1G49380	AT1G49380	AT1G49380	-1.16317	0.00816321	Down
AT5G07020	AT5G07020	AT5G07020	-1.15831	0.000338028	Down
AT3G03150	AT3G03150	AT3G03150	-1.15601	0.00373936	Down
AT1G15980	PnsB1	AT1G15980	-1.15016	0.0450557	Down
AT2G22970	SCPL11	AT2G22970	-1.13756	0.0465294	Down
ATCG00550	psbJ	ATCG00550	-1.11181	0.00495181	Down
AT3G02870	VTC4	AT3G02870	-1.10847	0.0271268	Down
AT3G47470	LHCA4	AT3G47470	-1.097	0.0205455	Down
AT3G53130	LUT1	AT3G53130	-1.09566	0.00601956	Down
AT5G14060	CARAB-AK-LYS	AT5G14060	-1.08015	0.0180769	Down
AT5G24930	COL4	AT5G24930	-1.07632	0.000621558	Down
AT3G10405	AT3G10405	AT3G10405	-1.07171	0.0351069	Down
AT2G03710	SEP4	AT2G03710	-1.07108	0.0449752	Down
AT2G36840	ACR10	AT2G36840	-1.05833	0.0374229	Down
AT1G68920	AT1G68920	AT1G68920	-1.05813	0.0146684	Down
AT5G24610	AT5G24610	AT5G24610	-1.02698	0.00856828	Down
AT5G54800	GPT1	AT5G54800	-1.00601	0.000629905	Down
AT5G66450	LPPepsilon2	AT5G66450	-1.00355	0.00228911	Down

## Sheet: rbohD rbohFTCV_vs_Col0TCV
User_ID	symbol	ensembl_ID	rbohDFTCV-Col0TCV_log2FC	rbohDFTCV-Col0TCV_adjPval	Direction
AT4G29030	AT4G29030	AT4G29030	17.0482	3.77e-08	Up
AT3G25795	AT3G25795	AT3G25795	11.9678	0.000995381	Up
AT5G54050	AT5G54050	AT5G54050	11.9053	3.58e-09	Up
AT4G31830	AT4G31830	AT4G31830	10.449	5.57e-09	Up
AT2G29380	HAI3	AT2G29380	10.091	3.37e-07	Up
AT5G44310	AT5G44310	AT5G44310	9.97319	4.64e-05	Up
AT2G35300	LEA18	AT2G35300	9.42103	9.26e-08	Up
AT2G02120	PDF2.1	AT2G02120	8.8023	8.03e-10	Up
AT1G75600	AT1G75600	AT1G75600	8.77243	1.18e-07	Up
AT5G24080	AT5G24080	AT5G24080	7.92237	8.8e-05	Up
AT5G66780	AT5G66780	AT5G66780	7.83251	0.000888472	Up
AT3G57010	AT3G57010	AT3G57010	7.3297	8.08e-12	Up
AT4G06320	AT4G06320	AT4G06320	7.14708	4.51e-06	Up
AT4G28088	AT4G28088	AT4G28088	7.1268	0.0202404	Up
AT3G44290	NAC060	AT3G44290	6.91591	0.0382757	Up
AT5G00755	AT5G00755	AT5G00755	6.79636	4.31e-05	Up
AT2G23910	AT2G23910	AT2G23910	6.73536	2.31e-06	Up
AT3G48510	AT3G48510	AT3G48510	6.72281	9.89e-05	Up
AT1G47980	AT1G47980	AT1G47980	6.68501	0.0027902	Up
AT5G07990	TT7	AT5G07990	6.58719	3.18e-14	Up
AT1G74080	MYB122	AT1G74080	6.57207	0.0391767	Up
AT2G34610	AT2G34610	AT2G34610	6.54755	3.4e-09	Up
AT4G09820	TT8	AT4G09820	6.54484	0.00365746	Up
AT4G03295	AT4G03295	AT4G03295	6.53553	2.49e-05	Up
AT4G07408	AT4G07408	AT4G07408	6.44581	4.45e-05	Up
AT4G37730	bZIP7	AT4G37730	6.44046	5.7e-06	Up
AT1G04527	AT1G04527	AT1G04527	6.35512	0.000116241	Up
AT2G36760	UGT73C2	AT2G36760	6.32138	0.0339109	Up
AT3G15670	AT3G15670	AT3G15670	6.31872	0.00369227	Up
AT1G11170	AT1G11170	AT1G11170	6.31072	1.39e-07	Up
AT3G00980	AT3G00980	AT3G00980	6.30622	2.73e-05	Up
AT3G09950	AT3G09950	AT3G09950	6.26563	0.0213789	Up
AT3G02795	AT3G02795	AT3G02795	6.23798	0.000100264	Up
AT3G00985	AT3G00985	AT3G00985	6.23161	3.27e-05	Up
AT2G31981	AT2G31981	AT2G31981	6.1382	0.024808	Up
AT4G12580	AT4G12580	AT4G12580	6.0852	4.89e-09	Up
AT4G33145	AT4G33145	AT4G33145	6.04928	0.00205961	Up
AT1G07957	AT1G07957	AT1G07957	6.01325	0.00102594	Up
AT1G28360	ERF12	AT1G28360	6.0019	0.000957734	Up
AT3G01316	AT3G01316	AT3G01316	5.99156	0.00157872	Up
AT1G16850	AT1G16850	AT1G16850	5.97215	1.19e-13	Up
AT2G04190	AT2G04190	AT2G04190	5.96949	0.0342827	Up
AT1G22470	AT1G22470	AT1G22470	5.94732	0.00110878	Up
AT1G04047	AT1G04047	AT1G04047	5.94399	6.44e-06	Up
AT1G05340	AT1G05340	AT1G05340	5.90245	2.1e-08	Up
AT1G03746	AT1G03746	AT1G03746	5.86631	0.00973981	Up
AT4G37420	AT4G37420	AT4G37420	5.84184	0.0307482	Up
AT4G36880	CP1 AT4G36880	AT4G36880	5.81752	0.00155824	Up
AT3G01313	AT3G01313	AT3G01313	5.80606	0.000544479	Up
AT5G65040	AT5G65040	AT5G65040	5.80286	2.03e-09	Up
AT4G33930	AT4G33930	AT4G33930	5.76527	0.000374573	Up
AT2G01430	HB17	AT2G01430	5.75197	7.27e-05	Up
AT2G23321	AT2G23321	AT2G23321	5.69622	9.23e-07	Up
AT3G15740	AT3G15740	AT3G15740	5.68586	0.0224065	Up
AT5G59200	OTP80	AT5G59200	5.64134	0.00135512	Up
AT3G57690	AGP23	AT3G57690	5.5955	0.0145464	Up
AT3G02725	AT3G02725	AT3G02725	5.53927	5.83e-05	Up
AT3G48700	CXE13	AT3G48700	5.49371	0.0152473	Up
AT2G43660	AT2G43660	AT2G43660	5.4723	0.0110852	Up
AT3G13525	AT3G13525	AT3G13525	5.37687	0.0044762	Up
AT1G03743	AT1G03743	AT1G03743	5.3509	0.00648549	Up
AT1G71000	AT1G71000	AT1G71000	5.34086	0.0108582	Up
AT4G16146	AT4G16146	AT4G16146	5.31972	9.37e-10	Up
AT3G26200	CYP71B22	AT3G26200	5.30715	1.27e-05	Up
AT5G45810	CIPK19	AT5G45810	5.28841	0.0035561	Up
AT1G77120	ADH1	AT1G77120	5.27372	1.8e-14	Up
AT5G02665	AT5G02665	AT5G02665	5.25707	0.00318351	Up
AT3G28007	SWEET4	AT3G28007	5.21871	5.87e-10	Up
AT5G46825	AT5G46825	AT5G46825	5.20712	0.00851077	Up
AT5G24880	AT5G24880	AT5G24880	5.20389	0.0387589	Up
AT5G21030	AT5G21030	AT5G21030	5.18199	0.00904454	Up
AT1G06667	AT1G06667	AT1G06667	5.1438	0.00532169	Up
AT4G10380	NIP5;1	AT4G10380	5.14171	3.07e-06	Up
AT2G27300	NTL8	AT2G27300	5.13321	0.000578281	Up
AT1G69880	TH8	AT1G69880	5.12235	0.0488625	Up
AT1G04778	AT1G04778	AT1G04778	5.12166	1.49e-05	Up
AT5G62160	ZIP12	AT5G62160	5.11489	0.000739632	Up
AT3G27415	AT3G27415	AT3G27415	5.10815	0.00691304	Up
AT3G03240	AT3G03240	AT3G03240	5.08311	5.58e-07	Up
AT1G19373	AT1G19373	AT1G19373	5.06929	0.00115637	Up
AT4G25433	AT4G25433	AT4G25433	5.05689	1.98e-06	Up
AT2G09745	AT2G09745	AT2G09745	5.05089	0.0287579	Up
AT1G13370	AT1G13370	AT1G13370	5.03504	4.26e-06	Up
AT1G05853	U5.5	AT1G05853	5.03222	5.51e-06	Up
AT2G08585	AT2G08585	AT2G08585	5.03094	0.00309184	Up
AT5G13225	AT5G13225	AT5G13225	4.99607	0.00693966	Up
AT2G25240	CCP3	AT2G25240	4.98367	0.00583477	Up
AT3G60670	AT3G60670	AT3G60670	4.98231	0.000713032	Up
AT3G13227	AT3G13227	AT3G13227	4.97781	0.000442778	Up
AT4G05285	AT4G05285	AT4G05285	4.9431	0.00281603	Up
AT2G42000	AtMT4a	AT2G42000	4.91988	0.0058316	Up
AT5G02570	AT5G02570	AT5G02570	4.90314	0.000281215	Up
AT3G49300	AT3G49300	AT3G49300	4.89791	0.00415998	Up
AT4G04475	AT4G04475	AT4G04475	4.88969	0.000703793	Up
AT1G03990	AT1G03990	AT1G03990	4.86501	0.00878202	Up
AT4G33980	AT4G33980	AT4G33980	4.84463	7.59e-05	Up
AT5G24860	FPF1	AT5G24860	4.82722	0.0459818	Up
AT3G08585	AT3G08585	AT3G08585	4.81189	0.0123439	Up
AT3G22840	ELIP1	AT3G22840	4.8012	5.55e-14	Up
AT5G48175	AT5G48175	AT5G48175	4.79661	0.0254455	Up
AT3G55860	AT3G55860	AT3G55860	4.79254	0.00265606	Up
AT5G01505	AT5G01505	AT5G01505	4.78784	0.000544479	Up
AT3G11150	AT3G11150	AT3G11150	4.78668	0.013724	Up
AT2G36750	UGT73C1	AT2G36750	4.74269	0.00102405	Up
AT5G05410	DREB2A	AT5G05410	4.62681	1.66e-06	Up
AT5G42930	AT5G42930	AT5G42930	4.62393	0.00177339	Up
AT4G22233	AT4G22233	AT4G22233	4.62292	0.0268855	Up
AT5G09125	AT5G09125	AT5G09125	4.62139	0.0054951	Up
AT2G34850	MEE25	AT2G34850	4.61549	5.4e-05	Up
AT1G47271	AT1G47271	AT1G47271	4.61515	0.0119703	Up
AT2G03855	ath-MIR5642b	AT2G03855	4.61058	0.00386837	Up
AT4G05055	AT4G05055	AT4G05055	4.6097	0.00202182	Up
AT4G07075	AT4G07075	AT4G07075	4.603	0.00533048	Up
AT4G07080	ath-MIR8176	AT4G07080	4.603	0.00533048	Up
ATCG01210	ATCG01210	ATCG01210	4.59911	1.33e-05	Up
ATCG00920	ATCG00920	ATCG00920	4.5986	1.34e-05	Up
AT5G02020	SIS	AT5G02020	4.59175	7.51e-08	Up
AT1G68723	AT1G68723	AT1G68723	4.582	0.00480928	Up
AT4G02380	SAG21	AT4G02380	4.54351	4.47e-06	Up
AT1G19565	AT1G19565	AT1G19565	4.5425	2.68e-05	Up
AT5G05220	AT5G05220	AT5G05220	4.52162	0.00498178	Up
AT2G36640	ECP63	AT2G36640	4.51644	0.0308694	Up
AT5G00760	AT5G00760	AT5G00760	4.51308	0.00606247	Up
AT5G07095	AT5G07095	AT5G07095	4.47837	8.27e-08	Up
AT4G40010	SNRK2.7	AT4G40010	4.46922	1.34e-06	Up
AT3G60972	AT3G60972	AT3G60972	4.46917	0.0191567	Up
AT5G07735	AT5G07735	AT5G07735	4.46473	0.00208485	Up
AT1G23450	AT1G23450	AT1G23450	4.46061	0.00245486	Up
AT4G01930	AT4G01930	AT4G01930	4.45394	0.000139164	Up
AT2G09815	AT2G09815	AT2G09815	4.44887	0.0489341	Up
AT4G12410	AT4G12410	AT4G12410	4.44747	5.07e-05	Up
AT5G37500	GORK	AT5G37500	4.43398	3.23e-07	Up
AT4G04465	AT4G04465	AT4G04465	4.43159	0.000197289	Up
AT1G69572	AT1G69572	AT1G69572	4.41223	0.00408032	Up
AT4G37295	AT4G37295	AT4G37295	4.40296	0.000163881	Up
AT5G62490	HVA22B	AT5G62490	4.40197	0.0492598	Up
AT3G03415	AT3G03415	AT3G03415	4.3843	0.0256233	Up
AT1G09867	AT1G09867	AT1G09867	4.37702	1.04e-09	Up
AT4G07070	AT4G07070	AT4G07070	4.37396	0.000417007	Up
AT4G16680	AT4G16680	AT4G16680	4.37172	4.22e-05	Up
AT3G10455	AT3G10455	AT3G10455	4.36054	0.00908219	Up
AT1G60970	AT1G60970	AT1G60970	4.34892	0.00148596	Up
AT4G39480	CYP96A9	AT4G39480	4.33996	0.0335677	Up
AT1G75620	AT1G75620	AT1G75620	4.32818	0.00407172	Up
AT1G08107	AT1G08107	AT1G08107	4.30693	0.0108783	Up
AT4G25635	AT4G25635	AT4G25635	4.3012	0.00112305	Up
AT3G09480	AT3G09480	AT3G09480	4.30061	7.17e-07	Up
AT2G37880	AT2G37880	AT2G37880	4.2991	0.00133746	Up
AT1G54570	PES1	AT1G54570	4.29817	5.71e-13	Up
AT2G17210	AT2G17210	AT2G17210	4.2878	0.0257757	Up
AT3G04975	AT3G04975	AT3G04975	4.27845	0.000872616	Up
AT2G06795	AT2G06795	AT2G06795	4.26209	0.0336582	Up
AT3G10527	AT3G10527	AT3G10527	4.26022	0.0239438	Up
AT5G15533	AT5G15533	AT5G15533	4.25257	2.82e-05	Up
AT3G52820	PAP22	AT3G52820	4.24797	0.000314934	Up
AT5G06305	AT5G06305	AT5G06305	4.24737	0.0100878	Up
AT4G19230	CYP707A1	AT4G19230	4.24646	1.35e-08	Up
AT5G51680	AT5G51680	AT5G51680	4.24641	0.0348862	Up
AT2G21780	AT2G21780	AT2G21780	4.24616	0.000981604	Up
AT1G19250	FMO1	AT1G19250	4.24426	0.0263569	Up
AT2G35730	AT2G35730	AT2G35730	4.2411	0.03449	Up
AT4G38590	BGAL14	AT4G38590	4.23746	0.000195876	Up
AT1G68050	FKF1	AT1G68050	4.23332	0.00644058	Up
AT1G09787	AT1G09787	AT1G09787	4.23279	0.0179148	Up
AT3G16800	AT3G16800	AT3G16800	4.23229	3.2e-13	Up
AT5G07105	AT5G07105	AT5G07105	4.23193	0.0014353	Up
AT3G27025	AT3G27025	AT3G27025	4.22542	0.00314271	Up
AT1G07476	AT1G07476	AT1G07476	4.21434	0.0213248	Up
AT1G05137	AT1G05137	AT1G05137	4.20441	0.0177908	Up
AT1G45616	RLP6	AT1G45616	4.19187	0.0239335	Up
ATCG00010	ATCG00010	ATCG00010	4.19052	0.0210962	Up
AT1G29230	CIPK18	AT1G29230	4.17469	0.00569872	Up
AT4G06746	RAP2.9	AT4G06746	4.14966	0.00399962	Up
AT1G52560	AT1G52560	AT1G52560	4.14919	0.00466681	Up
AT3G51240	F3H	AT3G51240	4.14901	3.23e-10	Up
AT4G07625	AT4G07625	AT4G07625	4.13665	0.0119703	Up
AT2G01340	At17.1	AT2G01340	4.12904	4.9e-05	Up
AT2G27280	AT2G27280	AT2G27280	4.12375	0.00704453	Up
AT5G64750	ABR1	AT5G64750	4.12368	0.00883179	Up
AT4G30540	AT4G30540	AT4G30540	4.12165	0.0185398	Up
AT2G31180	MYB14	AT2G31180	4.11888	0.0154746	Up
AT2G37260	TTG2	AT2G37260	4.09933	2.25e-05	Up
AT4G11911	AT4G11911	AT4G11911	4.09657	2.15e-05	Up
AT1G09877	AT1G09877	AT1G09877	4.0769	1.82e-06	Up
AT5G02675	AT5G02675	AT5G02675	4.07408	0.0044961	Up
AT1G08643	AT1G08643	AT1G08643	4.07029	0.00261309	Up
AT4G19038	LCR15	AT4G19038	4.07023	0.00732339	Up
AT1G53887	AT1G53887	AT1G53887	4.05673	3.13e-08	Up
AT3G09750	AT3G09750	AT3G09750	4.05591	0.000115343	Up
AT5G22460	AT5G22460	AT5G22460	4.05014	2.97e-09	Up
AT5G61800	AT5G61800	AT5G61800	4.04671	4.45e-07	Up
AT1G62370	AT1G62370	AT1G62370	4.0466	1.91e-06	Up
AT1G05680	UGT74E2	AT1G05680	4.04322	0.00382256	Up
AT2G45570	CYP76C2	AT2G45570	4.03995	0.0138953	Up
AT1G07393	AT1G07393	AT1G07393	4.0271	0.0494829	Up
AT2G37670	AT2G37670	AT2G37670	4.00985	0.00172259	Up
AT4G04205	AT4G04205	AT4G04205	4.00839	0.0358884	Up
AT2G45550	CYP76C4	AT2G45550	4.00539	0.0262274	Up
AT4G24110	AT4G24110	AT4G24110	3.9897	0.0026816	Up
AT5G08805	AT5G08805	AT5G08805	3.98779	0.0139142	Up
AT1G79360	OCT2	AT1G79360	3.98466	0.0168841	Up
AT1G24600	AT1G24600	AT1G24600	3.97263	5.07e-09	Up
AT1G06213	AT1G06213	AT1G06213	3.9717	0.00244142	Up
AT1G22340	UGT85A7	AT1G22340	3.9527	0.000503943	Up
AT4G31351	AT4G31351	AT4G31351	3.93922	0.00022743	Up
AT4G26365	AT4G26365	AT4G26365	3.93482	0.0272596	Up
AT1G62333	AT1G62333	AT1G62333	3.93139	0.0190606	Up
AT3G16120	AT3G16120	AT3G16120	3.92601	0.00322408	Up
AT1G68526	AT1G68526	AT1G68526	3.92392	7.95e-05	Up
AT3G29173	AT3G29173	AT3G29173	3.91496	7.14e-05	Up
AT4G08775	AT4G08775	AT4G08775	3.91437	0.0136513	Up
AT4G32780	AT4G32780	AT4G32780	3.91389	0.000830834	Up
AT4G31354	AT4G31354	AT4G31354	3.90675	1.44e-05	Up
AT4G19395	ath-MIR168a	AT4G19395	3.90217	0.000558181	Up
AT4G39950	CYP79B2	AT4G39950	3.9009	1.15e-05	Up
AT4G34210	SK11	AT4G34210	3.89157	0.0141355	Up
AT3G23240	ERF1	AT3G23240	3.88023	0.0019452	Up
AT4G32810	CCD8	AT4G32810	3.86994	0.0305898	Up
AT4G31248	AT4G31248	AT4G31248	3.85515	4.9e-06	Up
AT2G38340	DREB19	AT2G38340	3.8454	0.0248395	Up
AT4G05048	U49.1	AT4G05048	3.84191	0.00335601	Up
AT1G12013	SNOR111	AT1G12013	3.83441	6.34e-05	Up
AT5G05880	AT5G05880	AT5G05880	3.83434	0.00810011	Up
AT5G03645	AT5G03645	AT5G03645	3.81598	0.0223675	Up
AT3G26742	AT3G26742	AT3G26742	3.80976	0.0146381	Up
AT3G04985	AT3G04985	AT3G04985	3.80821	0.0240381	Up
AT2G39410	AT2G39410	AT2G39410	3.80369	0.00269282	Up
AT1G27380	RIC2	AT1G27380	3.80173	2.8e-05	Up
AT3G16040	AT3G16040	AT3G16040	3.79594	0.00157372	Up
AT5G17050	UGT78D2	AT5G17050	3.79448	4.32e-19	Up
AT5G26010	AT5G26010	AT5G26010	3.78871	0.0318173	Up
AT3G51300	ROP1	AT3G51300	3.78746	5.75e-06	Up
AT4G16105	AT4G16105	AT4G16105	3.78356	0.018931	Up
AT5G24600	AT5G24600	AT5G24600	3.78198	4.63e-06	Up
AT2G21490	LEA	AT2G21490	3.77515	0.0496018	Up
AT1G03220	AT1G03220	AT1G03220	3.76922	3.98e-07	Up
AT3G03535	AT3G03535	AT3G03535	3.76705	0.00151225	Up
AT3G49210	AT3G49210	AT3G49210	3.76152	1.57e-05	Up
AT4G21680	NRT1.8	AT4G21680	3.75249	0.0427347	Up
AT5G10965	AT5G10965	AT5G10965	3.75226	6.14e-06	Up
AT5G40730	AGP24	AT5G40730	3.73705	2.58e-09	Up
AT3G04775	AT3G04775	AT3G04775	3.73344	0.000277991	Up
AT3G17010	REM22	AT3G17010	3.73291	0.00217827	Up
AT4G25990	CIL	AT4G25990	3.73291	0.00104018	Up
AT4G18990	XTH29	AT4G18990	3.7212	0.000286747	Up
AT3G11050	FER2	AT3G11050	3.71478	4.89e-05	Up
AT1G70910	DEP	AT1G70910	3.71459	0.000502726	Up
AT2G33830	AT2G33830	AT2G33830	3.7047	5.23e-06	Up
AT5G66080	AT5G66080	AT5G66080	3.69591	4.08e-07	Up
AT3G09515	ath-MIR1888b	AT3G09515	3.68855	0.0273376	Up
AT3G04155	AT3G04155	AT3G04155	3.67833	0.0134645	Up
AT2G36780	AT2G36780	AT2G36780	3.66099	0.00476731	Up
AT1G17665	AT1G17665	AT1G17665	3.66095	0.0302907	Up
AT5G42840	AT5G42840	AT5G42840	3.65886	0.00698015	Up
AT3G03480	CHAT	AT3G03480	3.65765	1.5e-06	Up
AT2G25940	ALPHA-VPE	AT2G25940	3.64673	0.00446848	Up
AT5G04250	AT5G04250	AT5G04250	3.64114	1.46e-06	Up
AT2G08770	AT2G08770	AT2G08770	3.63747	1.69e-06	Up
AT1G53180	AT1G53180	AT1G53180	3.63635	0.026087	Up
AT1G61800	GPT2	AT1G61800	3.63338	2.57e-05	Up
AT5G50560	AT5G50660 AT5G50560	AT5G50560	3.63285	0.00187849	Up
AT5G50660	AT5G50660 AT5G50660	AT5G50660	3.63285	0.00187849	Up
AT3G57465	AT3G57465	AT3G57465	3.61816	0.0281838	Up
AT1G06540	AT1G06540	AT1G06540	3.61189	0.000107759	Up
AT3G05880	RCI2A	AT3G05880	3.60583	4.24e-11	Up
AT5G41315	GL3	AT5G41315	3.60022	1.67e-05	Up
AT4G08315	AT4G08315	AT4G08315	3.59477	0.0158107	Up
AT3G57980	AT3G57980	AT3G57980	3.59421	0.000597521	Up
AT4G06415	AT4G06415	AT4G06415	3.58785	0.0220591	Up
AT2G36770	AT2G36770	AT2G36770	3.58088	0.00693222	Up
AT2G08910	AT2G08910	AT2G08910	3.57452	0.00133053	Up
AT2G16586	AT2G16586	AT2G16586	3.57112	8.94e-06	Up
AT3G51290	AT3G51290	AT3G51290	3.56701	3.36e-06	Up
AT4G04485	AT4G04485	AT4G04485	3.55582	0.0151102	Up
AT5G55370	AT5G55370	AT5G55370	3.55335	0.0485889	Up
AT1G05913	AT1G05913	AT1G05913	3.55016	0.0233329	Up
AT1G09513	AT1G09513	AT1G09513	3.5491	0.00661872	Up
AT5G46295	AT5G46295	AT5G46295	3.54081	0.00233843	Up
AT3G14670	AT3G14670	AT3G14670	3.53583	0.0146381	Up
AT3G03525	AT3G03525	AT3G03525	3.53526	0.0136845	Up
AT3G60020	SK5	AT3G60020	3.53276	0.0290861	Up
AT4G19810	ChiC	AT4G19810	3.53206	0.00511378	Up
AT2G15480	UGT73B5	AT2G15480	3.52576	0.000245043	Up
AT3G08040	FRD3	AT3G08040	3.52407	0.0340203	Up
AT5G43380	TOPP6	AT5G43380	3.51597	8.73e-09	Up
AT1G09883	AT1G09883	AT1G09883	3.51497	6.71e-06	Up
AT3G02895	AT3G02895	AT3G02895	3.50889	0.0487315	Up
AT2G38400	AGT3	AT2G38400	3.50207	2.01e-07	Up
AT5G14180	MPL1	AT5G14180	3.48339	0.0138187	Up
AT3G09905	AT3G09905	AT3G09905	3.48117	0.0257564	Up
AT4G39110	AT4G39110	AT4G39110	3.48014	0.00553517	Up
AT2G36950	AT2G36950	AT2G36950	3.45562	1.65e-10	Up
AT4G37320	CYP81D5	AT4G37320	3.45382	1.56e-14	Up
AT2G22470	AGP2	AT2G22470	3.4471	0.000398883	Up
AT2G39240	AT2G39240	AT2G39240	3.43385	5.42e-05	Up
AT4G11543	AT4G11543	AT4G11543	3.43235	0.00087579	Up
AT2G03460	AT2G03460	AT2G03460	3.42736	0.0299936	Up
AT5G08980	AT5G08980	AT5G08980	3.41903	0.0362252	Up
AT1G03106	AT1G03106	AT1G03106	3.41723	0.0467162	Up
AT4G26290	AT4G26290	AT4G26290	3.41024	0.00363054	Up
AT3G03460	AT3G03460	AT3G03460	3.40834	6.16e-07	Up
AT5G36670	AT5G36670 AT5G36670	AT5G36670	3.4078	0.0421801	Up
AT5G36740	AT5G36670 AT5G36740	AT5G36740	3.4078	0.0421801	Up
AT3G21805	AT3G21805	AT3G21805	3.40638	0.0224625	Up
AT5G55507	AT5G55507	AT5G55507	3.40526	0.00348436	Up
AT5G04630	CYP77A9	AT5G04630	3.39697	0.00165413	Up
AT2G35750	AT2G35750	AT2G35750	3.39086	6.15e-07	Up
AT3G55120	TT5	AT3G55120	3.38926	4.84e-07	Up
AT2G30480	AT2G30480	AT2G30480	3.38734	1.72e-08	Up
AT1G54280	AT1G54280	AT1G54280	3.37369	0.0306232	Up
AT1G49610	AT1G49610	AT1G49610	3.36545	0.0459363	Up
AT1G16635	AT1G16635	AT1G16635	3.36465	0.00200689	Up
AT1G05247	AT1G05247	AT1G05247	3.3591	0.0147124	Up
AT5G64310	AGP1	AT5G64310	3.35593	0.000152601	Up
AT2G23000	scpl10	AT2G23000	3.35552	8.23e-07	Up
AT4G05100	MYB74	AT4G05100	3.35365	0.00170272	Up
AT4G17030	EXLB1	AT4G17030	3.35317	0.000601717	Up
AT1G60470	GolS4	AT1G60470	3.34807	0.0121655	Up
AT3G04510	LSH2	AT3G04510	3.34329	0.00810433	Up
AT1G19200	AT1G19200	AT1G19200	3.34323	1.39e-05	Up
AT4G08125	AT4G08125	AT4G08125	3.3406	0.0356715	Up
AT2G29370	AT2G29370	AT2G29370	3.33289	0.00033498	Up
AT5G42053	AT5G42053	AT5G42053	3.3324	0.00960066	Up
AT3G11020	DREB2B	AT3G11020	3.32212	0.0232595	Up
AT2G19610	AT2G19610	AT2G19610	3.31246	0.0152744	Up
AT5G16960	AT5G16960	AT5G16960	3.31035	0.0202748	Up
AT4G12740	AT4G12740	AT4G12740	3.30874	0.000826923	Up
AT2G16890	AT2G16890	AT2G16890	3.30452	3.42e-07	Up
AT5G06775	AT5G06775	AT5G06775	3.30094	0.0497857	Up
AT1G17744	AT1G17744	AT1G17744	3.29832	0.0161762	Up
AT4G39361	AT4G39361	AT4G39361	3.29781	0.000958101	Up
AT1G05330	AT1G05330	AT1G05330	3.29711	0.0179068	Up
AT2G33140	AT2G33140	AT2G33140	3.29407	0.0409525	Up
AT5G67310	CYP81G1	AT5G67310	3.29304	0.00843502	Up
AT3G23800	SBP3	AT3G23800	3.28301	0.0286596	Up
AT2G33815	AT2G33815	AT2G33815	3.27701	5.03e-05	Up
AT1G04380	AT1G04380	AT1G04380	3.27276	0.0179164	Up
AT3G02435	AT3G02435	AT3G02435	3.27116	0.00401992	Up
AT2G35765	AT2G35765	AT2G35765	3.26762	0.0466977	Up
AT1G71870	AT1G71870	AT1G71870	3.2597	0.00459312	Up
AT3G22450	AT3G22450	AT3G22450	3.25486	2.4e-06	Up
AT4G20325	AT4G20325	AT4G20325	3.2467	0.000100789	Up
AT3G08700	UBC12	AT3G08700	3.24222	0.00254516	Up
AT3G56730	AT3G56730	AT3G56730	3.24176	3.66e-06	Up
AT2G47275	ath-MIR403	AT2G47275	3.23908	0.00614067	Up
AT1G60680	AT1G60680	AT1G60680	3.22669	0.000515331	Up
AT4G13540	AT4G13540	AT4G13540	3.22417	2.79e-05	Up
AT4G37220	AT4G37220	AT4G37220	3.22158	0.00147684	Up
AT2G24535	AT2G24535	AT2G24535	3.21592	0.0392279	Up
AT1G20490	AT1G20490	AT1G20490	3.21447	0.00240956	Up
AT2G38255	AT2G38255	AT2G38255	3.2124	0.00219033	Up
AT5G01600	FER1	AT5G01600	3.21009	4.12e-06	Up
AT5G07725	AT5G07725	AT5G07725	3.20566	0.0114311	Up
AT1G71015	AT1G71015	AT1G71015	3.20266	0.00166143	Up
AT4G08805	AT4G08805	AT4G08805	3.20229	0.00443689	Up
AT4G24715	AT4G24715	AT4G24715	3.19855	0.0165317	Up
AT2G09045	AT2G09045	AT2G09045	3.18253	0.00227889	Up
AT3G07120	AT3G07120	AT3G07120	3.17458	0.0330431	Up
AT5G62520	SRO5	AT5G62520	3.17341	0.0103761	Up
AT4G39360	AT4G39360	AT4G39360	3.16607	0.0386884	Up
AT3G02095	AT3G02095	AT3G02095	3.16327	0.00291528	Up
AT3G24612	AT3G24612	AT3G24612	3.16059	0.0482152	Up
AT1G30800	AT1G30800	AT1G30800	3.16021	0.0237311	Up
AT3G11600	AT3G11600	AT3G11600	3.14841	2.86e-07	Up
AT3G13130	AT3G13130	AT3G13130	3.14693	0.0412369	Up
AT5G09430	AT5G09430	AT5G09430	3.14498	0.000735426	Up
AT1G54120	AT1G54120	AT1G54120	3.14369	6.15e-05	Up
AT3G51238	AT3G51238	AT3G51238	3.13469	0.00102551	Up
AT1G25422	AT1G25422	AT1G25422	3.13324	0.0272001	Up
AT2G19450	TAG1	AT2G19450	3.13032	1.5e-07	Up
AT5G64570	XYL4	AT5G64570	3.12373	5.2e-05	Up
AT4G12005	AT4G12005	AT4G12005	3.12257	0.0185821	Up
AT1G68795	CLE12	AT1G68795	3.12126	1.63e-06	Up
AT1G21695	AT1G21695	AT1G21695	3.12047	0.00389897	Up
AT2G01008	AT2G01008	AT2G01008	3.11706	4.69e-05	Up
AT1G14520	MIOX1	AT1G14520	3.11661	5.4e-05	Up
AT3G15280	AT3G15280	AT3G15280	3.11525	0.00650174	Up
AT4G19975	AT4G19975	AT4G19975	3.1125	0.0103761	Up
AT5G59340	WOX2	AT5G59340	3.10627	0.0068656	Up
AT5G47175	LCR3	AT5G47175	3.10074	0.0202225	Up
AT1G10040	AT1G10040	AT1G10040	3.10046	0.00305756	Up
AT1G06237	AT1G06237	AT1G06237	3.0949	1.3e-06	Up
AT4G34131	UGT73B3	AT4G34131	3.09303	0.0133751	Up
AT3G60150	AT3G60150	AT3G60150	3.09041	7.38e-06	Up
AT1G66700	PXMT1	AT1G66700	3.08765	0.0211419	Up
AT4G39270	AT4G39270	AT4G39270	3.08618	0.000663668	Up
AT1G09873	AT1G09873	AT1G09873	3.08041	0.000291012	Up
AT1G63440	HMA5	AT1G63440	3.07565	0.000943592	Up
AT1G19190	AT1G19190	AT1G19190	3.07052	0.00189628	Up
AT1G52890	NAC019	AT1G52890	3.07013	0.00255749	Up
AT4G39952	AT4G39952	AT4G39952	3.0694	3.59e-05	Up
AT3G53650	AT3G53650	AT3G53650	3.06872	1.6e-05	Up
AT2G46940	AT2G46940	AT2G46940	3.06395	0.00047304	Up
AT5G08445	AT5G08445	AT5G08445	3.055	0.00105094	Up
AT4G00670	AT4G00670	AT4G00670	3.04607	0.00146418	Up
AT2G41445	AT2G41445	AT2G41445	3.04458	0.00601818	Up
AT5G02055	AT5G02055	AT5G02055	3.04336	0.00143852	Up
AT5G06230	TBL9	AT5G06230	3.04331	0.0121624	Up
AT1G06475	AT1G06475	AT1G06475	3.04268	3.72e-05	Up
AT5G65350	HTR11	AT5G65350	3.03604	0.00114429	Up
AT3G03430	AT3G03430	AT3G03430	3.03573	0.00276152	Up
AT1G69630	AT1G69630	AT1G69630	3.03179	0.00187754	Up
AT5G57890	AT5G57890	AT5G57890	3.02956	2.12e-05	Up
AT4G28230	AT4G28230	AT4G28230	3.02505	5.03e-08	Up
AT1G28550	RABA1i	AT1G28550	3.02438	0.0202428	Up
AT4G12430	TPPF	AT4G12430	3.02416	1.04e-06	Up
AT5G05270	CHIL	AT5G05270	3.01378	0.00375537	Up
AT2G47780	AT2G47780	AT2G47780	3.0137	1.18e-06	Up
AT3G43970	AT3G43970	AT3G43970	3.01262	0.0180626	Up
AT1G09240	NAS3	AT1G09240	3.00675	0.0288585	Up
AT3G27330	AT3G27330	AT3G27330	3.00372	0.000138193	Up
AT5G06475	AT5G06475	AT5G06475	3.00189	0.0201222	Up
AT4G31398	AT4G31398	AT4G31398	2.99641	4.65e-05	Up
AT1G77145	AT1G77145	AT1G77145	2.9937	2.03e-06	Up
AT5G58320	NET4A	AT5G58320	2.99206	2e-07	Up
AT1G08937	AT1G08937	AT1G08937	2.99	0.0224048	Up
AT5G13880	AT5G13880	AT5G13880	2.98976	3.34e-08	Up
AT2G08660	AT2G08660	AT2G08660	2.98604	1.01e-05	Up
AT2G43700	AT2G43700	AT2G43700	2.98159	0.000233463	Up
AT5G02645	AT5G02645	AT5G02645	2.97986	0.00342347	Up
AT5G47170	AT5G47170	AT5G47170	2.97861	0.0327925	Up
ATMG01390	ATMG01390	ATMG01390	2.97748	3.6e-07	Up
AT3G02990	HSFA1E	AT3G02990	2.97678	3.09e-06	Up
AT1G09650	AT1G09650	AT1G09650	2.96762	0.0111137	Up
ATMG00640	ATMG00640	ATMG00640	2.96506	0.000448274	Up
AT1G77200	AT1G77200	AT1G77200	2.95744	0.0134345	Up
AT5G07680	NAC080	AT5G07680	2.95154	0.00260168	Up
AT4G40070	AT4G40070	AT4G40070	2.95066	0.000420274	Up
AT5G52220	AT5G52220	AT5G52220	2.94905	0.000268645	Up
AT3G57380	AT3G57380	AT3G57380	2.93652	0.00344412	Up
AT4G24010	CSLG1	AT4G24010	2.93514	0.000857035	Up
AT4G15890	AT4G15890	AT4G15890	2.93486	0.000138436	Up
AT4G25000	AMY1	AT4G25000	2.9348	0.0303607	Up
AT2G01021	AT2G01021	AT2G01021	2.93369	0.000112522	Up
AT4G14225	AT4G14225	AT4G14225	2.93145	0.00885747	Up
AT5G23980	FRO4	AT5G23980	2.92018	0.0116474	Up
AT3G02445	AT3G02445	AT3G02445	2.91994	0.00227889	Up
AT2G03410	AT2G03410	AT2G03410	2.91675	0.0131772	Up
AT2G35747	AT2G35747	AT2G35747	2.91267	0.000626483	Up
AT5G42965	AT5G42965	AT5G42965	2.9105	0.000826923	Up
AT4G20350	AT4G20350	AT4G20350	2.90614	1.37e-05	Up
AT3G02075	AT3G02075	AT3G02075	2.89577	0.0455904	Up
AT5G02515	AT5G02515	AT5G02515	2.8934	0.0281926	Up
AT4G38530	PLC1 AT4G38530	AT4G38530	2.8879	0.000903418	Up
AT1G52565	AT1G52565	AT1G52565	2.88486	0.00129208	Up
AT2G41450	AT2G41450	AT2G41450	2.8837	5.15e-05	Up
AT1G53540	AT1G53540	AT1G53540	2.88219	0.0377253	Up
AT5G56795	MT1B	AT5G56795	2.87701	0.000912574	Up
AT3G20110	CYP705A20	AT3G20110	2.87368	0.0493457	Up
AT3G49860	ARLA1B	AT3G49860	2.86973	0.00150872	Up
AT1G56140	AT1G56140	AT1G56140	2.86891	0.000685869	Up
AT5G40570	AT5G40570	AT5G40570	2.86474	0.000231985	Up
AT3G62510	AT3G62510	AT3G62510	2.864	0.0196615	Up
AT5G15510	AT5G15510	AT5G15510	2.86261	0.00325599	Up
AT3G13600	AT3G13600	AT3G13600	2.86191	0.0409237	Up
AT5G54840	SGP1	AT5G54840	2.86115	1.59e-07	Up
AT5G39130	AT5G39130	AT5G39130	2.86034	0.000945533	Up
AT3G09575	AT3G09575	AT3G09575	2.85933	0.000467334	Up
AT2G29330	TRI	AT2G29330	2.85687	0.047959	Up
AT1G20700	WOX14	AT1G20700	2.85671	0.00970061	Up
AT1G66060	AT1G66060	AT1G66060	2.85565	0.0283527	Up
AT5G20970	AT5G20970	AT5G20970	2.84935	0.000236342	Up
AT5G39610	NAC6	AT5G39610	2.84877	0.0162005	Up
AT3G61450	SYP73	AT3G61450	2.84464	0.000615653	Up
AT2G21130	AT2G21130	AT2G21130	2.84257	2.62e-07	Up
AT4G31240	AT4G31240	AT4G31240	2.83556	3.27e-06	Up
AT1G78430	RIP4	AT1G78430	2.83546	0.00647833	Up
AT2G06615	AT2G06615	AT2G06615	2.83361	0.00024304	Up
AT3G63320	AT3G63320	AT3G63320	2.83107	0.0482152	Up
AT3G02410	ICME-LIKE2	AT3G02410	2.83006	0.000600378	Up
AT4G27530	AT4G27530	AT4G27530	2.82974	0.0482368	Up
AT1G10530	AT1G10530	AT1G10530	2.82917	0.000885674	Up
AT1G27720	TAF4B	AT1G27720	2.82913	0.00826669	Up
AT2G07715	AT2G07715	AT2G07715	2.82434	7.48e-06	Up
AT1G76690	OPR2	AT1G76690	2.8224	4.93e-06	Up
AT1G62800	ASP4	AT1G62800	2.81808	0.000305305	Up
AT3G02575	AT3G02575	AT3G02575	2.81592	0.00511303	Up
AT4G02090	AT4G02090	AT4G02090	2.813	6.05e-05	Up
AT5G13790	AGL15	AT5G13790	2.81198	0.000585922	Up
AT3G51750	AT3G51750	AT3G51750	2.80516	3.95e-07	Up
AT5G47880	ERF1-1	AT5G47880	2.80375	1.33e-11	Up
AT2G29460	GSTU4	AT2G29460	2.80167	0.0233329	Up
AT4G04125	ath-MIR2936	AT4G04125	2.80065	0.00967836	Up
AT5G06115	AT5G06115	AT5G06115	2.80055	0.0129641	Up
AT2G07727	AT2G07727	AT2G07727	2.79285	8.42e-07	Up
AT3G62760	ATGSTF13	AT3G62760	2.79171	0.0387035	Up
AT3G12510	AT3G12510	AT3G12510	2.78823	9.05e-06	Up
AT2G01610	AT2G01610	AT2G01610	2.78504	0.000397496	Up
AT5G61600	ERF104	AT5G61600	2.78192	0.001994	Up
AT1G27170	AT1G27170	AT1G27170	2.78114	6.43e-08	Up
AT4G03230	AT4G03230	AT4G03230	2.77773	2.85e-06	Up
AT5G13750	ZIFL1	AT5G13750	2.77225	2.86e-11	Up
AT5G20960	AO1 AT5G20960	AT5G20960	2.77197	0.00117875	Up
AT5G59690	AT5G59690	AT5G59690	2.76956	1.28e-05	Up
AT3G51280	AT3G51280	AT3G51280	2.76939	0.00352493	Up
AT5G60610	AT5G60610	AT5G60610	2.76837	0.00253557	Up
AT5G08600	AT5G08600	AT5G08600	2.76537	0.000645001	Up
AT5G04340	ZAT6	AT5G04340	2.76322	0.00262784	Up
AT5G00875	AT5G00875	AT5G00875	2.76271	0.00070267	Up
AT5G05400	AT5G05400	AT5G05400	2.76206	0.0024129	Up
AT4G26010	AT4G26010	AT4G26010	2.75903	0.00524365	Up
AT5G49700	AT5G49700	AT5G49700	2.75761	0.000452678	Up
AT5G08515	AT5G08515	AT5G08515	2.7573	0.000759248	Up
AT1G55365	AT1G55365	AT1G55365	2.75418	0.00487287	Up
AT1G80320	AT1G80320	AT1G80320	2.75052	0.0025191	Up
AT1G48500	JAZ4	AT1G48500	2.74857	0.00030827	Up
AT3G23020	AT3G23020	AT3G23020	2.74222	0.000102034	Up
ATMG00560	rpl2 ATMG00560	ATMG00560	2.73838	0.000109887	Up
AT1G76965	AT1G76965	AT1G76965	2.73708	0.0227864	Up
AT2G27180	AT2G27180	AT2G27180	2.72819	0.000372397	Up
AT3G48180	AT3G48180	AT3G48180	2.72771	0.000739632	Up
AT2G41470	AT2G41470	AT2G41470	2.72383	0.00308524	Up
AT2G08905	AT2G08905	AT2G08905	2.72027	4.07e-05	Up
AT5G60630	AT5G60630	AT5G60630	2.71724	0.00776614	Up
AT5G25240	AT5G25240	AT5G25240	2.71678	0.000273084	Up
AT1G03180	AT1G03180	AT1G03180	2.71559	0.00491464	Up
AT5G43400	AT5G43400	AT5G43400	2.71233	9.31e-07	Up
AT2G15880	AT2G15880	AT2G15880	2.71216	0.0139341	Up
AT4G03925	AT4G03925	AT4G03925	2.71125	0.00374572	Up
AT5G61550	AT5G61550	AT5G61550	2.70877	0.00233145	Up
AT5G26330	AT5G26330	AT5G26330	2.70747	0.00276262	Up
AT4G24420	AT4G24420	AT4G24420	2.70508	0.0294799	Up
AT1G08730	XIC	AT1G08730	2.70478	0.00888808	Up
AT1G66690	AT1G66690	AT1G66690	2.70003	0.00919458	Up
AT5G59865	AT5G59865	AT5G59865	2.6977	0.00342132	Up
AT2G38250	AT2G38250	AT2G38250	2.69627	0.0263195	Up
AT5G43250	NF-YC13	AT5G43250	2.69022	0.00189889	Up
AT3G02015	AT3G02015	AT3G02015	2.68648	0.0330072	Up
AT2G32430	AT2G32430	AT2G32430	2.68627	1.01e-08	Up
AT5G08000	E13L3	AT5G08000	2.68626	0.0462406	Up
AT4G30830	AT4G30830	AT4G30830	2.68396	0.000443116	Up
AT4G36260	STY2	AT4G36260	2.68367	0.00313302	Up
AT3G19500	AT3G19500	AT3G19500	2.68301	0.000609846	Up
AT5G59720	HSP18.2	AT5G59720	2.68235	0.000701214	Up
AT1G13350	AT1G13350	AT1G13350	2.67883	6.03e-06	Up
AT2G42720	AT2G42720	AT2G42720	2.67848	0.0134801	Up
AT2G25620	DBP1	AT2G25620	2.67808	7.7e-10	Up
AT2G07689	AT2G07689	AT2G07689	2.66547	0.00901036	Up
AT5G48880	KAT5	AT5G48880	2.66438	7.69e-05	Up
AT4G39670	AT4G39670	AT4G39670	2.66148	0.0279394	Up
AT1G29770	AT1G29770	AT1G29770	2.66141	0.00357519	Up
AT4G04972	AT4G04972	AT4G04972	2.66121	0.0412797	Up
ATMG00220	ATMG00220	ATMG00220	2.66117	0.000925637	Up
AT4G33020	ZIP9	AT4G33020	2.64932	0.0491691	Up
AT3G25290	AT3G25290	AT3G25290	2.6474	2.74e-05	Up
AT4G22270	MRB1	AT4G22270	2.64734	2.31e-09	Up
AT5G01495	AT5G01495	AT5G01495	2.64615	0.0335666	Up
AT2G39300	AT2G39300	AT2G39300	2.64163	0.00233075	Up
AT5G43770	AT5G43770	AT5G43770	2.63984	0.0103155	Up
AT3G03435	AT3G03435	AT3G03435	2.63646	0.0218348	Up
AT5G20830	SUS1	AT5G20830	2.63119	9.27e-07	Up
AT4G40085	AT4G40085	AT4G40085	2.62834	0.00077325	Up
AT1G05920	AT1G05920	AT1G05920	2.62786	0.0485335	Up
AT4G09030	AGP10	AT4G09030	2.61476	5.2e-09	Up
AT2G43590	AT2G43590	AT2G43590	2.61387	0.0362613	Up
AT1G33700	AT1G33700	AT1G33700	2.61328	4.81e-05	Up
AT1G34480	AT1G34480	AT1G34480	2.61171	0.0119805	Up
AT5G13870	XTH5	AT5G13870	2.60985	1.29e-07	Up
AT1G23935	AT1G23935	AT1G23935	2.60102	0.0435522	Up
AT4G27410	RD26	AT4G27410	2.59654	0.00863758	Up
AT3G07960	PIP5K6	AT3G07960	2.59214	0.00361179	Up
AT5G10625	AT5G10625	AT5G10625	2.58579	0.00810763	Up
AT5G05530	AT5G05530	AT5G05530	2.58465	0.0256438	Up
AT5G61370	AT5G61370	AT5G61370	2.58283	0.0016381	Up
AT4G31408	AT4G31408	AT4G31408	2.57995	0.000749093	Up
AT4G34332	AT4G34332	AT4G34332	2.57809	0.0210962	Up
AT3G48835	AT3G48835	AT3G48835	2.57391	0.010578	Up
AT2G20770	GCL2	AT2G20770	2.57312	0.000927215	Up
AT5G20940	AT5G20940	AT5G20940	2.57109	0.00958029	Up
AT4G27790	AT4G27790	AT4G27790	2.56984	0.0223335	Up
AT1G62300	WRKY6	AT1G62300	2.56728	0.00636308	Up
AT1G74020	SS2 AT1G74020	AT1G74020	2.56644	7.5e-06	Up
AT4G17215	AT4G17215	AT4G17215	2.55987	0.00385924	Up
AT5G16100	AT5G16100	AT5G16100	2.55667	0.0431624	Up
AT3G13010	AT3G13010	AT3G13010	2.55526	0.0422738	Up
AT3G58710	WRKY69	AT3G58710	2.55374	4.97e-08	Up
AT1G02470	AT1G02470	AT1G02470	2.55352	0.000111986	Up
AT2G41730	AT2G41730	AT2G41730	2.55101	0.0328804	Up
AT1G73690	CDKD1;1	AT1G73690	2.54927	0.00121214	Up
AT4G16600	PGSIP8	AT4G16600	2.54089	0.026733	Up
AT5G63320	NPX1	AT5G63320	2.53872	1.68e-07	Up
AT3G44300	NIT2	AT3G44300	2.53753	0.0345383	Up
AT2G41050	AT2G41050	AT2G41050	2.5373	0.00157923	Up
AT1G06033	AT1G06033	AT1G06033	2.53357	7.53e-05	Up
AT1G06233	AT1G06233	AT1G06233	2.52885	3.34e-05	Up
AT3G01650	RGLG1	AT3G01650	2.52666	8.19e-05	Up
AT4G30370	AT4G30370	AT4G30370	2.52651	0.000272977	Up
AT3G53730	AT3G53730	AT3G53730	2.52532	6.78e-09	Up
AT2G36660	PAB7	AT2G36660	2.52464	0.0269059	Up
AT2G28250	NCRK	AT2G28250	2.52286	0.00157049	Up
AT5G07885	AT5G07885	AT5G07885	2.52178	3.99e-05	Up
AT5G59970	AT5G59970	AT5G59970	2.52098	0.000538019	Up
AT3G03445	AT3G03445	AT3G03445	2.50959	0.047959	Up
AT3G15650	AT3G15650	AT3G15650	2.50949	0.00643894	Up
AT5G60430	AT5G60430	AT5G60430	2.50776	5.1e-06	Up
AT2G44880	AHG11	AT2G44880	2.50169	0.0219621	Up
AT4G39364	AT4G39364	AT4G39364	2.50111	1.4e-07	Up
AT2G07725	rpl5 AT2G07725	AT2G07725	2.49631	9.22e-06	Up
AT1G06420	AT1G06420	AT1G06420	2.49534	0.0110995	Up
AT4G27510	AT4G27510	AT4G27510	2.4939	0.0432044	Up
AT1G62045	AT1G62045	AT1G62045	2.49161	2.8e-06	Up
AT4G31875	AT4G31875	AT4G31875	2.48923	0.00261841	Up
AT1G62000	AT1G62000	AT1G62000	2.48601	0.0131547	Up
AT5G50690	HSD4 AT5G50690	AT5G50690	2.48558	0.000461445	Up
AT5G50590	HSD4 AT5G50590	AT5G50590	2.48546	0.000509825	Up
AT5G02325	AT5G02325	AT5G02325	2.48381	0.0208832	Up
AT1G45229	AT1G45229	AT1G45229	2.48165	0.000136974	Up
AT1G64320	AT1G64320	AT1G64320	2.481	0.0149634	Up
AT3G50390	AT3G50390	AT3G50390	2.47719	0.0239819	Up
AT1G74010	AT1G74010	AT1G74010	2.47452	0.00105669	Up
AT3G45930	AT3G45930	AT3G45930	2.46879	0.000103833	Up
AT1G70340	AT1G70340	AT1G70340	2.46806	0.041819	Up
AT4G06315	AT4G06315	AT4G06315	2.46541	0.0101784	Up
AT1G04220	KCS2	AT1G04220	2.46538	0.00106821	Up
AT1G14730	AT1G14730	AT1G14730	2.46489	2.7e-05	Up
AT4G26470	AT4G26470	AT4G26470	2.46202	0.00505989	Up
AT2G18100	AT2G18100	AT2G18100	2.46187	0.00107615	Up
AT1G18570	MYB51	AT1G18570	2.46176	0.0121516	Up
AT5G08860	AT5G08860	AT5G08860	2.4586	0.0203957	Up
AT5G18065	AT5G18065	AT5G18065	2.45695	0.00158332	Up
AT5G48820	ICK6	AT5G48820	2.45532	0.0402911	Up
AT3G21530	AT3G21530	AT3G21530	2.44288	0.0316131	Up
AT4G00695	AT4G00695	AT4G00695	2.44075	0.00255657	Up
AT3G26050	AT3G26050	AT3G26050	2.43941	0.0450372	Up
AT5G23240	AT5G23240	AT5G23240	2.43807	0.0167793	Up
AT5G59170	AT5G59170	AT5G59170	2.43697	0.0295473	Up
AT4G40020	AT4G40020	AT4G40020	2.43411	0.0460948	Up
AT1G15050	IAA34	AT1G15050	2.42923	0.00436351	Up
AT4G06410	AT4G06410	AT4G06410	2.4265	0.000228131	Up
AT1G04583	AT1G04583	AT1G04583	2.41983	0.020343	Up
AT1G05400	AT1G05400	AT1G05400	2.41876	0.0103077	Up
AT5G59570	BOA	AT5G59570	2.41846	0.00146586	Up
AT1G20410	AT1G20410	AT1G20410	2.41404	2.19e-07	Up
AT4G30935	WRKY32	AT4G30935	2.41083	3.49e-07	Up
AT4G37370	CYP81D8	AT4G37370	2.41035	0.0342246	Up
AT1G05040	AT1G05040	AT1G05040	2.40692	0.0305582	Up
AT1G76590	AT1G76590	AT1G76590	2.40054	0.00526082	Up
AT5G11090	AT5G11090	AT5G11090	2.39886	0.000102678	Up
AT3G02525	AT3G02525	AT3G02525	2.3959	0.0467169	Up
AT3G11405	AT3G11405	AT3G11405	2.39471	0.0100481	Up
AT1G24735	AT1G24735	AT1G24735	2.39138	1.73e-05	Up
AT1G48470	GLN1;5	AT1G48470	2.39037	0.0431304	Up
AT5G42330	AT5G42330	AT5G42330	2.3881	0.00175975	Up
AT5G41471	SNOR108	AT5G41471	2.37809	0.0322887	Up
AT4G11550	AT4G11550	AT4G11550	2.37545	0.00503414	Up
AT5G66830	AT5G66830	AT5G66830	2.37481	0.0105586	Up
AT1G72800	AT1G72800	AT1G72800	2.3728	0.000116132	Up
AT5G10830	AT5G10830	AT5G10830	2.36904	4.13e-05	Up
ATMG01320	ATMG01320	ATMG01320	2.36708	0.000245809	Up
AT3G55910	AT3G55910	AT3G55910	2.36503	0.00596991	Up
AT2G40435	AT2G40435	AT2G40435	2.3648	0.00025838	Up
AT2G36800	DOGT1	AT2G36800	2.3623	0.0420126	Up
AT2G36730	AT2G36730	AT2G36730	2.35655	0.00101118	Up
AT2G45040	AT2G45040	AT2G45040	2.35383	0.0334869	Up
AT2G26180	IQD6	AT2G26180	2.35173	0.0301889	Up
AT3G28370	AT3G28370	AT3G28370	2.35062	0.000666178	Up
AT5G57060	AT5G57060	AT5G57060	2.34938	2.57e-12	Up
AT3G29000	AT3G29000	AT3G29000	2.34703	0.0428841	Up
AT4G36630	EMB2754	AT4G36630	2.34021	5.04e-08	Up
AT1G27730	STZ	AT1G27730	2.33899	0.0294272	Up
AT5G25770	AT5G25770	AT5G25770	2.33755	2.23e-05	Up
AT2G40160	TBL30	AT2G40160	2.33474	0.00533429	Up
AT1G73370	SUS6	AT1G73370	2.33353	8.75e-05	Up
AT3G03350	AT3G03350	AT3G03350	2.33278	0.00888402	Up
AT2G07687	AT2G07687	AT2G07687	2.33251	0.000312369	Up
AT3G06900	U4.2	AT3G06900	2.33081	0.0348069	Up
AT2G18780	AT2G18780	AT2G18780	2.33018	7.7e-07	Up
AT3G27355	AT3G27355	AT3G27355	2.33014	0.00329623	Up
AT5G01110	AT5G01110	AT5G01110	2.32992	0.00955219	Up
AT2G33380	RD20	AT2G33380	2.32969	5.5e-05	Up
AT3G58540	AT3G58540	AT3G58540	2.32763	0.0010964	Up
AT1G50390	AT1G50390	AT1G50390	2.32704	0.00190747	Up
AT2G26310	FAP2	AT2G26310	2.32685	0.00282378	Up
AT3G11325	AT3G11325	AT3G11325	2.32683	0.0120403	Up
AT3G10870	MES17	AT3G10870	2.32508	0.00496795	Up
AT5G65280	GCL1	AT5G65280	2.32421	0.000178531	Up
AT4G00305	AT4G00305	AT4G00305	2.32394	0.00385973	Up
AT4G21065	AT4G21065	AT4G21065	2.32392	0.00495019	Up
AT4G24130	AT4G24130	AT4G24130	2.32159	0.00236224	Up
AT1G76170	AT1G76170	AT1G76170	2.32128	5.84e-05	Up
AT5G17450	HIPP21	AT5G17450	2.32101	1.26e-06	Up
AT3G55890	AT3G55890	AT3G55890	2.31659	0.0306801	Up
AT3G16900	AT3G16900	AT3G16900	2.31099	0.0012193	Up
AT3G23930	AT3G23930	AT3G23930	2.31007	0.00197455	Up
AT4G27660	AT4G27660	AT4G27660	2.30902	0.000317563	Up
AT3G11773	AT3G11773	AT3G11773	2.30556	0.00986802	Up
AT1G19750	AT1G19750	AT1G19750	2.29965	0.00591387	Up
ATMG00520	matR	ATMG00520	2.29785	0.0412797	Up
AT5G60470	AT5G60470	AT5G60470	2.29307	0.0296413	Up
AT1G01570	AT1G01570	AT1G01570	2.29289	0.000319766	Up
AT3G05210	ERCC1	AT3G05210	2.28647	5.86e-08	Up
AT1G06243	AT1G06243	AT1G06243	2.28093	0.00838956	Up
AT1G06440	AT1G06440	AT1G06440	2.27903	0.00157764	Up
AT3G17712	AT3G17712	AT3G17712	2.27887	0.0185139	Up
AT1G05423	AT1G05423	AT1G05423	2.27614	0.0127825	Up
AT5G13330	Rap2.6L	AT5G13330	2.27458	0.0302989	Up
AT5G46080	AT5G46080	AT5G46080	2.27448	0.0260143	Up
AT1G04067	AT1G04067	AT1G04067	2.26958	0.0271927	Up
AT2G20723	AT2G20723	AT2G20723	2.26791	0.0262597	Up
AT2G34400	AT2G34400	AT2G34400	2.26664	0.00300667	Up
AT2G24545	AT2G24545	AT2G24545	2.26548	0.000210883	Up
AT4G04760	AT4G04760	AT4G04760	2.26103	0.0150389	Up
AT1G20120	AT1G20120	AT1G20120	2.25886	0.000961096	Up
AT5G08920	AT5G08920	AT5G08920	2.25601	0.019382	Up
AT3G16030	CES101	AT3G16030	2.25466	0.00226341	Up
AT1G05510	AT1G05510	AT1G05510	2.25438	0.0168582	Up
AT3G48900	AT3G48900	AT3G48900	2.25279	0.011044	Up
AT5G12280	AT5G12280	AT5G12280	2.25022	0.0421587	Up
AT3G20660	OCT4	AT3G20660	2.2502	0.000233723	Up
AT4G27852	AT4G27852	AT4G27852	2.24724	0.0134345	Up
AT1G80660	HA9	AT1G80660	2.24602	0.0272967	Up
AT5G14960	DEL2	AT5G14960	2.24424	0.00775575	Up
AT2G33385	arpc2b	AT2G33385	2.2439	0.0123351	Up
AT1G20570	AT1G20570	AT1G20570	2.24313	0.0224045	Up
ATMG00070	ATMG00070	ATMG00070	2.24007	0.000580692	Up
AT1G74740	CPK30	AT1G74740	2.23949	1.74e-08	Up
AT5G24318	AT5G24318	AT5G24318	2.23864	5.61e-05	Up
AT5G65207	AT5G65207	AT5G65207	2.23824	0.00221281	Up
AT3G49130	AT3G49130	AT3G49130	2.23746	0.040463	Up
AT1G06030	AT1G06030	AT1G06030	2.23695	0.0423178	Up
AT1G62310	AT1G62310	AT1G62310	2.23395	4.69e-05	Up
AT1G71250	AT1G71250	AT1G71250	2.23369	0.0315647	Up
AT4G36620	GATA19	AT4G36620	2.23364	0.00190064	Up
AT3G03105	AT3G03105	AT3G03105	2.23308	0.0162098	Up
AT1G28050	BBX13	AT1G28050	2.23251	0.00544527	Up
AT1G75960	AT1G75960	AT1G75960	2.23246	0.00281917	Up
AT3G22900	NRPD7	AT3G22900	2.22822	0.000810839	Up
AT1G04247	AT1G04247	AT1G04247	2.22466	0.00359543	Up
AT3G60961	AT3G60961	AT3G60961	2.22275	0.00215991	Up
AT3G29010	AT3G29010	AT3G29010	2.22049	0.000714769	Up
AT3G51740	IMK2	AT3G51740	2.21951	0.0037109	Up
AT1G15110	PSS1	AT1G15110	2.21934	5.98e-06	Up
AT4G13030	AT4G13030	AT4G13030	2.21927	0.000586027	Up
AT4G34880	AT4G34880	AT4G34880	2.21665	0.0141587	Up
AT3G22460	OASA2	AT3G22460	2.21527	0.00713627	Up
AT1G13740	AFP2	AT1G13740	2.21505	0.00047304	Up
AT5G14280	AT5G14280	AT5G14280	2.21368	4.89e-05	Up
AT5G66480	AT5G66480	AT5G66480	2.21223	0.012632	Up
AT5G43240	AT5G43240	AT5G43240	2.21178	0.0301689	Up
AT2G35600	BRXL1	AT2G35600	2.21173	0.00891255	Up
AT2G48150	GPX4	AT2G48150	2.20927	0.0308518	Up
AT5G67330	NRAMP4	AT5G67330	2.20693	1.47e-10	Up
AT3G62590	AT3G62590	AT3G62590	2.20629	0.00289582	Up
AT3G14060	AT3G14060	AT3G14060	2.20596	0.0223264	Up
AT5G16200	AT5G16200	AT5G16200	2.20416	3.71e-07	Up
AT4G15563	AT4G15563	AT4G15563	2.20384	0.0139442	Up
AT2G26790	AT2G26790	AT2G26790	2.20337	0.00328124	Up
AT4G40065	AT4G40065	AT4G40065	2.20104	0.00485332	Up
AT3G25620	ABCG21	AT3G25620	2.20102	0.0010463	Up
AT1G69210	AT1G69210	AT1G69210	2.20027	0.000842229	Up
AT1G62570	FMO GS-OX4	AT1G62570	2.19906	0.000127746	Up
AT1G50400	AT1G50400	AT1G50400	2.19746	0.0223635	Up
AT4G35500	AT4G35500	AT4G35500	2.1971	8.49e-07	Up
AT1G34630	AT1G34630	AT1G34630	2.18922	5.68e-09	Up
AT5G22450	AT5G22450	AT5G22450	2.18857	9.96e-10	Up
AT1G05670	AT1G05670	AT1G05670	2.18834	0.000772196	Up
AT5G01910	AT5G01910	AT5G01910	2.18318	0.000233326	Up
AT1G66500	AT1G66500	AT1G66500	2.17976	0.00305811	Up
AT3G42860	AT3G42860	AT3G42860	2.17577	0.000217654	Up
AT5G18810	SCL28	AT5G18810	2.17123	0.0135234	Up
AT4G38215	AT4G38215	AT4G38215	2.1697	0.0122331	Up
AT1G49560	AT1G49560	AT1G49560	2.16833	9.2e-06	Up
AT3G15352	COX17	AT3G15352	2.16659	5.01e-08	Up
AT3G27070	TOM20-1	AT3G27070	2.16201	0.00439011	Up
AT3G49055	AT3G49055	AT3G49055	2.16174	0.0191248	Up
AT5G53895	AT5G53895	AT5G53895	2.15827	0.00623952	Up
AT5G52547	AT5G52547	AT5G52547	2.15678	0.000243441	Up
AT1G04823	AT1G04823	AT1G04823	2.15607	0.044812	Up
AT1G07400	AT1G07400	AT1G07400	2.15576	0.0455538	Up
AT4G27580	AT4G27580	AT4G27580	2.15423	0.0222159	Up
AT1G50630	AT1G50630	AT1G50630	2.15381	2.73e-11	Up
AT2G34660	ABCC2	AT2G34660	2.15351	4.04e-17	Up
AT5G39090	AT5G39090	AT5G39090	2.15285	0.00117938	Up
AT4G05775	AT4G05775	AT4G05775	2.14565	0.0462396	Up
AT1G09773	AT1G09773	AT1G09773	2.14562	0.0428864	Up
AT1G64563	AT1G64563	AT1G64563	2.14317	0.0349188	Up
AT3G13020	AT3G13020	AT3G13020	2.1407	0.0152133	Up
AT1G09257	AT1G09257	AT1G09257	2.13892	0.00295598	Up
AT3G13225	AT3G13225	AT3G13225	2.13846	2.5e-05	Up
AT3G59580	AT3G59580	AT3G59580	2.13514	0.00354421	Up
AT2G04145	AT2G04145	AT2G04145	2.13413	0.00263121	Up
AT1G09190	AT1G09190	AT1G09190	2.1337	0.0052702	Up
AT1G27300	AT1G27300	AT1G27300	2.13091	9.64e-05	Up
AT1G51520	AT1G51520	AT1G51520	2.12972	0.00187043	Up
AT5G01200	AT5G01200	AT5G01200	2.12754	0.0100188	Up
AT1G44800	SIAR1	AT1G44800	2.12482	0.0479949	Up
AT1G80810	AT1G80810	AT1G80810	2.12367	4.4e-09	Up
AT2G35744	AT2G35744	AT2G35744	2.12342	0.000180668	Up
AT2G37040	PAL1	AT2G37040	2.12306	0.00206369	Up
AT2G22730	AT2G22730	AT2G22730	2.12263	0.00568218	Up
AT4G28350	AT4G28350	AT4G28350	2.12033	0.0139751	Up
AT5G03060	AT5G03060	AT5G03060	2.12016	0.0156326	Up
AT5G17850	AT5G17850	AT5G17850	2.11748	0.000983911	Up
AT1G44760	AT1G44760	AT1G44760	2.11676	0.00153627	Up
AT3G24520	HSFC1	AT3G24520	2.11649	0.00859694	Up
AT1G09863	AT1G09863	AT1G09863	2.11473	0.00364525	Up
AT3G20490	AT3G20490	AT3G20490	2.1116	9.07e-05	Up
AT1G17920	HDG12	AT1G17920	2.1112	0.00720508	Up
AT5G64560	MGT9	AT5G64560	2.11103	2.69e-15	Up
AT4G19700	RING	AT4G19700	2.11049	1.99e-05	Up
AT1G28190	AT1G28190	AT1G28190	2.11043	0.036803	Up
AT3G18100	MYB4R1	AT3G18100	2.11014	0.000269881	Up
AT1G53910	RAP2.12	AT1G53910	2.10975	4.39e-13	Up
AT3G00970	AT3G00970	AT3G00970	2.10957	0.0379365	Up
AT3G48660	AT3G48660	AT3G48660	2.10859	0.00381885	Up
AT4G03330	SYP123	AT4G03330	2.10657	0.0260535	Up
AT4G19400	AT4G19400	AT4G19400	2.10607	0.00105384	Up
AT5G65110	ACX2	AT5G65110	2.10572	0.00960923	Up
AT3G59820	LETM1	AT3G59820	2.10516	0.0123398	Up
AT5G23950	AT5G23950	AT5G23950	2.10429	0.000232046	Up
AT3G09640	APX2	AT3G09640	2.10258	0.0364514	Up
AT1G10800	AT1G10800	AT1G10800	2.10098	0.000217955	Up
AT1G05894	AT1G05894	AT1G05894	2.09964	0.0193972	Up
AT2G28110	FRA8	AT2G28110	2.09824	0.00921927	Up
AT5G47590	AT5G47590	AT5G47590	2.09499	0.00707538	Up
AT1G15230	AT1G15230	AT1G15230	2.0929	0.000139163	Up
AT1G17300	AT1G17300	AT1G17300	2.09002	0.0469236	Up
AT5G47670	NF-YB6	AT5G47670	2.08954	0.000425184	Up
AT5G13490	AAC2	AT5G13490	2.08736	1.79e-05	Up
AT2G07875	AT2G07875	AT2G07875	2.08725	0.0386593	Up
AT2G01890	PAP8	AT2G01890	2.08696	0.00230872	Up
AT2G39250	SNZ	AT2G39250	2.08573	0.000479555	Up
AT4G02940	AT4G02940	AT4G02940	2.08369	3.42e-07	Up
AT5G66380	FOLT1	AT5G66380	2.0831	4.09e-05	Up
AT3G47950	HA4	AT3G47950	2.08186	0.0051436	Up
AT3G26840	PES2	AT3G26840	2.08023	0.00354499	Up
AT5G15940	AT5G15940	AT5G15940	2.07738	0.0220147	Up
AT3G59690	IQD13	AT3G59690	2.07667	7.67e-07	Up
AT3G55560	AGF2	AT3G55560	2.07346	0.00034779	Up
AT3G08820	AT3G08820	AT3G08820	2.07252	0.000950303	Up
AT2G46040	AT2G46040	AT2G46040	2.0707	0.0014762	Up
AT5G58380	SIP1 AT5G58380	AT5G58380	2.06731	1.11e-08	Up
AT1G22275	ZYP1b	AT1G22275	2.06465	0.0252433	Up
AT5G65230	MYB53	AT5G65230	2.06175	0.0205596	Up
AT4G00280	AT4G00280	AT4G00280	2.06117	0.0272294	Up
AT5G57910	AT5G57910	AT5G57910	2.05721	5.82e-05	Up
AT4G31100	AT4G31100	AT4G31100	2.05719	0.0138237	Up
AT4G37430	CYP91A2	AT4G37430	2.05524	0.00305173	Up
AT3G13210	AT3G13210	AT3G13210	2.05257	0.0034191	Up
AT3G24110	AT3G24110	AT3G24110	2.04989	0.00965627	Up
AT2G30040	MAPKKK14	AT2G30040	2.04636	0.0153513	Up
AT2G37770	ChlAKR	AT2G37770	2.04577	0.0359935	Up
AT3G21700	SGP2	AT3G21700	2.04529	4.56e-05	Up
AT2G36380	ABCG34	AT2G36380	2.04507	0.000159462	Up
AT1G15900	AT1G15900	AT1G15900	2.04131	0.00747749	Up
AT3G50910	AT3G50910	AT3G50910	2.04115	5.42e-05	Up
AT5G14700	AT5G14700	AT5G14700	2.03968	2.2e-05	Up
AT3G09775	AT3G09775	AT3G09775	2.03966	0.000906412	Up
AT2G12550	NUB1	AT2G12550	2.03905	6.42e-05	Up
AT2G20835	AT2G20835	AT2G20835	2.03731	0.0295324	Up
AT2G33460	RIC1	AT2G33460	2.03568	0.0104603	Up
AT1G21160	AT1G21160	AT1G21160	2.03518	2.47e-08	Up
AT2G46572	AT2G46572	AT2G46572	2.03493	0.000123702	Up
AT2G34340	AT2G34340	AT2G34340	2.03471	0.0013325	Up
AT1G19180	JAZ1	AT1G19180	2.02968	0.0314565	Up
AT3G09032	AT3G09032	AT3G09032	2.02904	0.0316597	Up
AT4G22780	ACR7	AT4G22780	2.02802	0.00227069	Up
AT4G16690	MES16	AT4G16690	2.02434	7.09e-05	Up
AT4G23660	PPT1	AT4G23660	2.0198	3.34e-13	Up
AT2G23790	AT2G23790	AT2G23790	2.01741	6.36e-08	Up
AT3G61160	AT3G61160	AT3G61160	2.01697	0.0226793	Up
AT5G59845	AT5G59845	AT5G59845	2.01387	0.0182038	Up
AT1G61460	AT1G61460	AT1G61460	2.01328	0.000594908	Up
AT5G47430	AT5G47430	AT5G47430	2.01323	7.84e-11	Up
AT1G48390	AT1G48390	AT1G48390	2.01307	0.000970827	Up
AT4G02460	PMS1	AT4G02460	2.01079	0.000257306	Up
AT1G32450	NRT1.5	AT1G32450	2.01041	0.0123439	Up
AT1G32385	AT1G32385	AT1G32385	2.00982	0.0091211	Up
AT1G05560	UGT75B1	AT1G05560	2.0086	0.00344994	Up
AT3G25710	BHLH32	AT3G25710	2.00821	1.17e-06	Up
AT5G40340	AT5G40340	AT5G40340	2.00684	1.27e-08	Up
AT3G13090	ABCC6	AT3G13090	1.99842	0.0362648	Up
AT2G48090	AT2G48090	AT2G48090	1.99492	0.00264696	Up
AT4G22980	AT4G22980	AT4G22980	1.99392	0.0127001	Up
AT2G46620	AT2G46620	AT2G46620	1.99295	0.00781927	Up
AT3G12070	RGTB2	AT3G12070	1.99199	0.000560643	Up
AT1G53060	AT1G53060	AT1G53060	1.99193	0.0288165	Up
AT1G03080	NET1D	AT1G03080	1.99003	1.14e-09	Up
AT5G64080	XYP1	AT5G64080	1.98877	0.00453006	Up
AT5G67160	EPS1	AT5G67160	1.98581	0.000126085	Up
AT5G28300	AT5G28300	AT5G28300	1.98419	5.12e-07	Up
AT1G20630	CAT1	AT1G20630	1.9835	6.54e-05	Up
AT4G15120	AT4G15120	AT4G15120	1.98341	0.00232541	Up
AT2G20320	AT2G20320	AT2G20320	1.98337	3.34e-05	Up
AT3G09190	AT3G09190	AT3G09190	1.9817	0.00333108	Up
AT5G01940	AT5G01940	AT5G01940	1.97811	0.00249289	Up
AT1G15430	AT1G15430	AT1G15430	1.97312	0.000396684	Up
AT5G16360	AT5G16360	AT5G16360	1.97253	0.00496065	Up
AT4G15260	AT4G15260	AT4G15260	1.9671	0.00060044	Up
AT4G23990	CSLG3	AT4G23990	1.96666	0.010268	Up
AT5G43640	AT5G43640	AT5G43640	1.96422	0.0480225	Up
AT1G23550	SRO2	AT1G23550	1.96388	0.0436633	Up
AT2G44200	AT2G44200	AT2G44200	1.95877	1.37e-07	Up
AT1G01720	ATAF1	AT1G01720	1.95681	0.00370297	Up
AT3G25221	AT3G25221	AT3G25221	1.95577	0.0227124	Up
AT1G09193	AT1G09193	AT1G09193	1.95556	0.0214968	Up
AT5G58180	ATYKT62	AT5G58180	1.95308	0.0362547	Up
AT3G57020	AT3G57020	AT3G57020	1.95271	2.08e-05	Up
AT3G19660	AT3G19660	AT3G19660	1.95224	0.00020342	Up
AT5G15853	AT5G15853	AT5G15853	1.95104	0.0307802	Up
AT2G41178	AT2G41178	AT2G41178	1.9476	0.00956705	Up
AT1G37150	HCS2	AT1G37150	1.94738	0.0306754	Up
AT5G14980	AT5G14980	AT5G14980	1.94654	0.0431158	Up
AT2G43820	UGT74F2	AT2G43820	1.94503	0.00818913	Up
AT3G21600	AT3G21600	AT3G21600	1.945	0.00733517	Up
AT4G24710	AT4G24710	AT4G24710	1.94418	0.00114454	Up
AT2G36970	AT2G36970	AT2G36970	1.9406	0.0100345	Up
AT3G14630	CYP72A9	AT3G14630	1.94057	0.0452088	Up
AT3G47160	AT3G47160	AT3G47160	1.93948	0.00234676	Up
AT5G66460	MAN7	AT5G66460	1.93836	0.000623832	Up
AT1G70140	FH8	AT1G70140	1.93647	0.0160907	Up
AT5G39160	AT5G39160	AT5G39160	1.93551	0.00832102	Up
AT2G42330	AT2G42330	AT2G42330	1.93548	0.00523408	Up
AT1G23050	AT1G23050	AT1G23050	1.93501	0.00906762	Up
AT2G38890	AT2G38890	AT2G38890	1.93428	0.00496845	Up
AT5G52630	MEF1	AT5G52630	1.93366	0.00636163	Up
AT1G72840	AT1G72840	AT1G72840	1.92939	0.0016381	Up
AT2G37510	AT2G37510	AT2G37510	1.92872	0.000322693	Up
AT3G27570	AT3G27570	AT3G27570	1.92842	1.86e-17	Up
AT3G04165	AT3G04165	AT3G04165	1.92792	0.0109665	Up
AT5G54910	AT5G54910	AT5G54910	1.92665	3.14e-05	Up
AT5G37750	AT5G37750	AT5G37750	1.92639	0.0170824	Up
AT5G41800	AT5G41800	AT5G41800	1.92588	1.71e-07	Up
AT3G47360	HSD3	AT3G47360	1.92056	5.73e-06	Up
AT1G08340	AT1G08340	AT1G08340	1.91739	0.0191367	Up
AT3G26350	AT3G26350	AT3G26350	1.91694	0.00828429	Up
AT1G62886	AT1G62886	AT1G62886	1.91668	0.0135945	Up
AT3G15020	mMDH2	AT3G15020	1.91435	5.62e-11	Up
AT4G31550	WRKY11	AT4G31550	1.91422	0.000623832	Up
AT5G25580	AT5G25580	AT5G25580	1.91334	0.0048414	Up
AT1G03920	AT1G03920	AT1G03920	1.91307	0.0290379	Up
AT1G61260	AT1G61260	AT1G61260	1.91273	0.00722178	Up
AT5G54650	Fh5	AT5G54650	1.91045	0.000940168	Up
AT5G07880	SNAP29	AT5G07880	1.9097	0.0447166	Up
AT2G02350	SKIP3	AT2G02350	1.90789	0.0110271	Up
AT1G60930	AT1G60930	AT1G60930	1.90322	0.012335	Up
AT5G08820	AT5G08820	AT5G08820	1.90232	0.0471498	Up
AT5G48180	NSP5	AT5G48180	1.90202	3.31e-06	Up
AT4G23420	AT4G23420	AT4G23420	1.90187	0.000309434	Up
AT2G31990	AT2G31990	AT2G31990	1.90157	0.00198553	Up
AT3G52115	GR1 AT3G52115	AT3G52115	1.90043	0.00476731	Up
AT4G15620	AT4G15620	AT4G15620	1.89992	0.00390349	Up
ATMG00210	rpl5 ATMG00210	ATMG00210	1.89952	0.0111997	Up
AT2G26150	HSFA2	AT2G26150	1.8991	0.0460948	Up
AT3G15760	AT3G15760	AT3G15760	1.8963	0.0211419	Up
AT3G54320	WRI1	AT3G54320	1.89216	0.000125392	Up
AT2G01010	AT2G01010	AT2G01010	1.89067	7.69e-05	Up
AT1G48370	YSL8	AT1G48370	1.8905	0.00640265	Up
AT1G53680	GSTU28	AT1G53680	1.89048	0.0036914	Up
AT2G39400	AT2G39400	AT2G39400	1.88847	0.00189312	Up
AT1G22550	AT1G22550	AT1G22550	1.88739	0.0188509	Up
AT4G01670	AT4G01670	AT4G01670	1.88561	0.0479821	Up
AT4G27780	ACBP2	AT4G27780	1.88344	7.53e-07	Up
AT2G37150	AT2G37150	AT2G37150	1.87885	0.00046386	Up
AT5G39190	GER2 AT5G39190	AT5G39190	1.87809	0.0125409	Up
AT5G46640	AT5G46640	AT5G46640	1.87654	2.79e-05	Up
AT3G05200	ATL6	AT3G05200	1.87249	0.0129035	Up
AT1G07820	AT1G07820	AT1G07820	1.87082	0.000106472	Up
AT5G01700	AT5G01700	AT5G01700	1.87049	0.00318351	Up
AT1G78310	AT1G78310	AT1G78310	1.86818	4e-05	Up
AT5G15537	AT5G15537	AT5G15537	1.8665	0.00190752	Up
AT4G30470	AT4G30470	AT4G30470	1.86549	0.000159822	Up
AT4G14290	AT4G14290	AT4G14290	1.8648	0.00300667	Up
AT1G04277	AT1G04277	AT1G04277	1.86441	0.0179208	Up
AT4G00690	ULP1B	AT4G00690	1.86331	0.00806857	Up
AT1G50520	CYP705A27	AT1G50520	1.86265	0.000722351	Up
AT4G31400	CTF7	AT4G31400	1.86137	0.000609172	Up
AT5G17210	AT5G17210	AT5G17210	1.86008	4.86e-05	Up
AT2G30362	AT2G30362	AT2G30362	1.85828	0.0139486	Up
AT5G25790	AT5G25790	AT5G25790	1.85827	0.0017344	Up
AT2G36420	TRM27	AT2G36420	1.85772	0.0021747	Up
AT5G10400	AT5G10400	AT5G10400	1.85653	0.0339245	Up
AT3G21295	AT3G21295	AT3G21295	1.85417	0.000105622	Up
AT1G10320	AT1G10320	AT1G10320	1.85292	4.56e-05	Up
AT5G10650	AT5G10650	AT5G10650	1.84352	0.00103447	Up
AT1G34160	AT1G34160	AT1G34160	1.84257	0.015156	Up
AT1G34370	STOP1	AT1G34370	1.84196	0.000455206	Up
AT2G22790	AT2G22790	AT2G22790	1.84188	0.00851019	Up
AT5G22840	AT5G22840	AT5G22840	1.84048	3.76e-07	Up
AT4G31110	AT4G31110	AT4G31110	1.84036	0.0317665	Up
AT4G06245	AT4G06245	AT4G06245	1.84011	0.0427574	Up
AT3G08570	AT3G08570	AT3G08570	1.83995	0.00815456	Up
AT1G77170	AT1G77170	AT1G77170	1.83888	0.0107799	Up
AT1G22890	AT1G22890	AT1G22890	1.83638	0.016054	Up
AT1G76878	AT1G76878	AT1G76878	1.83605	0.0014538	Up
AT3G16170	AAE13	AT3G16170	1.83363	1.26e-07	Up
AT4G25707	AT4G25707	AT4G25707	1.83264	0.0121565	Up
AT1G51130	AT1G51130	AT1G51130	1.83103	0.00588866	Up
AT4G29800	PLP8	AT4G29800	1.83078	0.00325021	Up
AT2G32179	AT2G32179	AT2G32179	1.83058	0.0472381	Up
AT3G26922	AT3G26922	AT3G26922	1.82913	0.00740878	Up
AT5G46460	AT5G46460	AT5G46460	1.82521	0.019938	Up
AT3G06500	A/N-InvC	AT3G06500	1.82508	0.0256095	Up
AT4G05631	AT4G05631	AT4G05631	1.82381	0.0135093	Up
AT5G28920	AT5G28920	AT5G28920	1.82365	0.00105101	Up
AT5G04905	AT5G04905	AT5G04905	1.82324	0.000921673	Up
AT2G04955	AT2G04955	AT2G04955	1.82144	0.00566894	Up
AT4G36640	AT4G36640	AT4G36640	1.81677	3.78e-07	Up
AT5G54640	RAT5	AT5G54640	1.81468	8.39e-05	Up
AT1G58360	AAP1	AT1G58360	1.8139	2.66e-07	Up
AT4G37180	AT4G37180	AT4G37180	1.81008	0.0293003	Up
AT4G33985	AT4G33985	AT4G33985	1.80981	0.00356642	Up
AT1G07150	MAPKKK13	AT1G07150	1.80838	0.0223335	Up
AT1G17190	GSTU26	AT1G17190	1.80669	0.00877114	Up
AT3G57140	SDP1-LIKE	AT3G57140	1.80632	0.0203025	Up
AT5G61810	APC1	AT5G61810	1.80427	4.22e-07	Up
AT4G01110	AT4G01110	AT4G01110	1.79957	0.0220383	Up
AT5G13370	AT5G13370	AT5G13370	1.79932	0.0122457	Up
AT5G43620	AT5G43620	AT5G43620	1.79788	0.0063047	Up
AT4G16630	AT4G16630	AT4G16630	1.79758	0.00318329	Up
AT1G74250	AT1G74250	AT1G74250	1.79609	0.000104619	Up
AT2G47350	AT2G47350	AT2G47350	1.79549	3.9e-08	Up
AT1G76760	TY1	AT1G76760	1.79361	0.000338407	Up
AT1G03320	AT1G03320	AT1G03320	1.79361	0.0480568	Up
AT3G01410	AT3G01410	AT3G01410	1.7936	0.00851019	Up
AT1G09610	GXM3	AT1G09610	1.79358	0.0269202	Up
AT5G16680	AT5G16680	AT5G16680	1.79179	2.52e-06	Up
AT1G33980	UPF3	AT1G33980	1.79091	9.93e-07	Up
AT1G76380	AT1G76380	AT1G76380	1.78919	9.37e-06	Up
AT3G21430	ALY3	AT3G21430	1.78812	1.22e-05	Up
AT1G05183	AT1G05183	AT1G05183	1.78578	0.0470259	Up
AT1G56660	AT1G56660	AT1G56660	1.78555	0.0134432	Up
AT2G19240	AT2G19240	AT2G19240	1.78543	0.0118094	Up
AT1G62560	FMO GS-OX3	AT1G62560	1.78531	0.0484327	Up
AT3G48830	AT3G48830	AT3G48830	1.78317	0.00828187	Up
AT1G15670	AT1G15670	AT1G15670	1.78221	0.0349522	Up
AT2G41082	AT2G41082	AT2G41082	1.78135	0.000952572	Up
AT2G27310	AT2G27310	AT2G27310	1.78013	0.0492082	Up
AT1G02850	BGLU11	AT1G02850	1.78007	0.0452236	Up
AT3G30380	AT3G30380	AT3G30380	1.77976	4.24e-05	Up
AT2G46790	PRR9	AT2G46790	1.77942	1.8e-09	Up
AT3G26910	AT3G26910	AT3G26910	1.77909	0.0196238	Up
AT3G02665	AT3G02665	AT3G02665	1.77888	0.00808855	Up
AT3G46320	AT3G46320	AT3G46320	1.77861	0.025819	Up
AT1G09467	AT1G09467	AT1G09467	1.778	0.0186219	Up
AT3G44880	ACD1	AT3G44880	1.7761	2.61e-06	Up
AT3G15150	HPY2	AT3G15150	1.77262	0.000558181	Up
AT5G47660	AT5G47660	AT5G47660	1.77164	0.000143524	Up
AT5G53440	AT5G53440	AT5G53440	1.77144	4.59e-08	Up
AT3G41768	AT3G41768	AT3G41768	1.77095	0.000213886	Up
AT3G52100	AT3G52100	AT3G52100	1.77036	2.84e-05	Up
AT5G29000	PHL1	AT5G29000	1.76776	7.65e-06	Up
AT2G19490	RECA2	AT2G19490	1.766	0.000397041	Up
AT3G16980	NRPB9A	AT3G16980	1.76521	0.0165867	Up
AT4G15730	AT4G15730	AT4G15730	1.76515	0.0344893	Up
AT2G20722	AT2G20722	AT2G20722	1.75992	0.0478831	Up
AT3G14070	CAX9	AT3G14070	1.75934	0.000747739	Up
AT3G19670	PRP40B	AT3G19670	1.75875	4.86e-06	Up
AT4G26488	AT4G26488	AT4G26488	1.75611	0.0105217	Up
AT1G78910	AT1G78910	AT1G78910	1.75453	0.00504166	Up
AT1G04780	AT1G04780	AT1G04780	1.75291	1.22e-07	Up
AT5G18475	AT5G18475	AT5G18475	1.75248	0.039317	Up
AT2G22560	NET2D	AT2G22560	1.75215	7.26e-05	Up
AT1G51370	AT1G51370	AT1G51370	1.75112	0.00099957	Up
AT1G13960	WRKY4	AT1G13960	1.74873	9.36e-07	Up
AT3G45638	AT3G45638	AT3G45638	1.74867	0.0167667	Up
AT5G28910	AT5G28910	AT5G28910	1.74775	0.0188361	Up
AT1G21150	AT1G21150	AT1G21150	1.74755	0.00498673	Up
AT4G39090	RD19	AT4G39090	1.74669	0.000245177	Up
AT5G10946	AT5G10946	AT5G10946	1.74361	0.00790063	Up
AT3G10550	MTM1 AT3G10550	AT3G10550	1.74289	0.00023583	Up
AT3G16730	HEB2	AT3G16730	1.74233	0.0118512	Up
AT1G09195	AT1G09195	AT1G09195	1.7423	0.00115051	Up
AT1G07590	AT1G07590	AT1G07590	1.74203	0.0278807	Up
AT4G30080	ARF16	AT4G30080	1.73947	7.48e-09	Up
AT1G71990	FUT13	AT1G71990	1.73869	0.000202903	Up
AT5G57900	SKIP1	AT5G57900	1.7377	3.95e-05	Up
AT5G60335	AT5G60335	AT5G60335	1.73739	0.0123911	Up
AT3G06520	AT3G06520	AT3G06520	1.73681	0.0057217	Up
AT1G01660	AT1G01660	AT1G01660	1.73428	0.0295114	Up
AT1G01240	AT1G01240	AT1G01240	1.73322	0.00129182	Up
AT1G22403	AT1G22403	AT1G22403	1.73241	5.58e-07	Up
AT3G51990	AT3G51990	AT3G51990	1.73117	2.31e-07	Up
AT1G77310	AT1G77310	AT1G77310	1.72867	0.00256945	Up
AT5G43780	APS4	AT5G43780	1.72798	0.0234643	Up
AT5G66760	SDH1-1	AT5G66760	1.72749	9.9e-15	Up
AT3G51970	ASAT1	AT3G51970	1.72677	0.000697388	Up
AT3G06530	AT3G06530	AT3G06530	1.72574	0.00770843	Up
AT3G57590	AT3G57590	AT3G57590	1.72545	8.83e-05	Up
AT3G23260	AT3G23260	AT3G23260	1.72491	0.0265318	Up
AT4G21070	BRCA1	AT4G21070	1.72196	0.0271268	Up
AT5G39785	AT5G39785	AT5G39785	1.72077	0.0109999	Up
AT1G66650	AT1G66650	AT1G66650	1.72033	0.014751	Up
AT4G18020	APRR2	AT4G18020	1.72009	2.56e-09	Up
AT2G45290	AT2G45290	AT2G45290	1.7192	1.11e-05	Up
AT5G14890	AT5G14890	AT5G14890	1.71791	0.00875671	Up
AT4G12750	AT4G12750	AT4G12750	1.71631	0.00103157	Up
AT1G78960	LUP2	AT1G78960	1.71533	2.28e-07	Up
AT3G54630	AT3G54630	AT3G54630	1.71514	0.00281388	Up
AT5G48610	AT5G48610	AT5G48610	1.71286	0.000120601	Up
AT2G35950	EDA12	AT2G35950	1.71231	0.0397654	Up
AT3G54950	pPLAIIIbeta	AT3G54950	1.71054	6.65e-05	Up
AT1G75300	AT1G75300	AT1G75300	1.70848	0.0173818	Up
AT1G73066	AT1G73066	AT1G73066	1.70749	0.0298324	Up
AT4G05430	AT4G05430	AT4G05430	1.70575	0.0305446	Up
AT3G47347	AT3G47347	AT3G47347	1.7033	0.000823649	Up
AT4G29170	ATMND1	AT4G29170	1.70296	0.00740325	Up
AT1G05767	AT1G05767	AT1G05767	1.70213	3.02e-05	Up
AT2G45120	AT2G45120	AT2G45120	1.69997	0.0385484	Up
AT1G20870	AT1G20870	AT1G20870	1.69954	0.00965004	Up
AT2G23150	NRAMP3	AT2G23150	1.69888	8e-05	Up
AT5G65870	PSK5	AT5G65870	1.69871	0.0103839	Up
AT5G63550	AT5G63550	AT5G63550	1.69819	0.000890544	Up
AT3G14900	EMB3120	AT3G14900	1.69742	0.0189864	Up
AT1G31485	AT1G31485	AT1G31485	1.69389	0.019166	Up
AT3G03870	AT3G03870	AT3G03870	1.69274	0.0335677	Up
AT2G22010	RKP	AT2G22010	1.68745	2.88e-05	Up
AT5G47720	AACT1 AT5G47720	AT5G47720	1.68684	0.000113972	Up
AT1G69295	PDCB4	AT1G69295	1.68633	8.74e-07	Up
AT3G51895	SULTR3;1	AT3G51895	1.68335	0.000131923	Up
AT5G46180	DELTA-OAT	AT5G46180	1.68322	0.000158726	Up
AT3G02890	AT3G02890	AT3G02890	1.68243	5.29e-06	Up
AT3G03340	UNE6	AT3G03340	1.68049	7.67e-07	Up
AT5G18370	AT5G18370	AT5G18370	1.67972	0.00261828	Up
AT1G60080	AT1G60080	AT1G60080	1.67945	0.00189679	Up
AT3G53260	PAL2	AT3G53260	1.67811	0.00891255	Up
AT3G17770	AT3G17770	AT3G17770	1.6777	0.0002096	Up
AT1G27500	KLCR3	AT1G27500	1.67559	0.0064536	Up
ATMG00160	cox2	ATMG00160	1.6741	0.0159464	Up
AT2G45023	AT2G45023	AT2G45023	1.67363	2.73e-05	Up
AT1G04840	AT1G04840	AT1G04840	1.67145	0.0232228	Up
AT2G32320	AT2G32320	AT2G32320	1.67137	7.6e-06	Up
AT3G56990	EDA7	AT3G56990	1.67113	0.00192334	Up
AT4G20340	AT4G20340	AT4G20340	1.67077	0.000115037	Up
AT3G25990	AT3G25990	AT3G25990	1.67066	0.0247709	Up
AT5G42010	AT5G42010	AT5G42010	1.67036	0.0298995	Up
AT2G42280	FBH4	AT2G42280	1.66955	0.00107656	Up
AT3G60180	AT3G60180	AT3G60180	1.66932	0.00130492	Up
AT4G34710	ADC2	AT4G34710	1.66919	0.0101835	Up
AT1G35320	AT1G35320	AT1G35320	1.66853	0.00357051	Up
AT5G57410	AT5G57410	AT5G57410	1.66704	0.0490972	Up
AT5G44210	ERF9	AT5G44210	1.66681	0.0342183	Up
AT5G61980	AGD1	AT5G61980	1.66531	0.0479949	Up
AT2G41505	AT2G41505	AT2G41505	1.66511	0.019686	Up
AT5G17440	AT5G17440	AT5G17440	1.66505	4.37e-09	Up
AT4G35130	AT4G35130	AT4G35130	1.66237	0.0235786	Up
AT4G40080	AT4G40080	AT4G40080	1.66224	0.0205632	Up
AT1G55740	SIP1 AT1G55740	AT1G55740	1.66089	0.0464146	Up
AT2G24140	AT2G24140	AT2G24140	1.65809	0.0140161	Up
AT3G15800	AT3G15800	AT3G15800	1.65688	0.0109154	Up
AT3G55390	AT3G55390	AT3G55390	1.65603	0.0016147	Up
AT2G17580	AT2G17580	AT2G17580	1.6535	3.98e-05	Up
AT3G57940	AT3G57940	AT3G57940	1.65284	0.00227237	Up
AT3G61060	PP2-A13	AT3G61060	1.65061	0.0219576	Up
AT5G41820	RGTA2	AT5G41820	1.64787	0.0236909	Up
AT1G03470	NET3A	AT1G03470	1.64049	0.00126543	Up
AT4G38230	CPK26	AT4G38230	1.64041	0.00324874	Up
AT5G47490	AT5G47490	AT5G47490	1.63996	0.00112623	Up
AT4G33700	AT4G33700	AT4G33700	1.63952	9.4e-07	Up
AT5G25210	AT5G25210	AT5G25210	1.63894	0.0020371	Up
AT3G02400	AT3G02400	AT3G02400	1.63875	3.89e-06	Up
AT3G49725	AT3G49725	AT3G49725	1.63871	5.41e-06	Up
AT4G04750	AT4G04750	AT4G04750	1.63797	0.0233872	Up
AT4G22250	AT4G22250	AT4G22250	1.63585	0.0482054	Up
AT1G48040	AT1G48040	AT1G48040	1.63202	3.66e-06	Up
AT5G25280	AT5G25280	AT5G25280	1.63107	0.0203385	Up
AT5G57080	AT5G57080	AT5G57080	1.6307	0.00244324	Up
AT5G63970	RGLG3	AT5G63970	1.63029	0.0127326	Up
AT5G01400	ESP4	AT5G01400	1.62947	3.92e-06	Up
AT3G48790	AT3G48790	AT3G48790	1.62895	0.0444976	Up
AT5G64970	AT5G64970	AT5G64970	1.62225	6e-06	Up
AT1G31935	AT1G31935	AT1G31935	1.6212	0.0152511	Up
AT1G26800	AT1G26800	AT1G26800	1.62085	0.0176865	Up
AT3G50650	AT3G50650	AT3G50650	1.62073	0.00372624	Up
AT5G06190	AT5G06190	AT5G06190	1.61941	0.000135603	Up
AT1G33415	AT1G33415	AT1G33415	1.61795	0.0017319	Up
AT2G16770	bZIP23	AT2G16770	1.61656	2.29e-05	Up
AT3G06480	AT3G06480	AT3G06480	1.6129	2.09e-05	Up
AT3G49400	AT3G49400	AT3G49400	1.61285	0.0302989	Up
AT5G17370	AT5G17370	AT5G17370	1.6117	0.00310311	Up
AT1G79620	AT1G79620	AT1G79620	1.61122	0.0284299	Up
AT1G78070	AT1G78070	AT1G78070	1.61084	0.00106531	Up
AT2G41220	GLU2	AT2G41220	1.60913	3.45e-09	Up
AT5G40640	AT5G40640	AT5G40640	1.60784	0.000685869	Up
AT1G22710	SUC2	AT1G22710	1.60718	4.75e-05	Up
AT3G55310	AT3G55310	AT3G55310	1.60605	0.0497857	Up
AT1G17745	PGDH	AT1G17745	1.60561	0.0201258	Up
AT4G19050	AT4G19050	AT4G19050	1.60551	0.013394	Up
AT1G78710	TBL42	AT1G78710	1.60301	6.26e-06	Up
AT4G00200	AT4G00200	AT4G00200	1.6024	0.00212791	Up
AT4G33090	APM1	AT4G33090	1.60226	2.43e-11	Up
AT3G17630	CHX19	AT3G17630	1.60063	0.000574378	Up
AT1G54290	AT1G54290	AT1G54290	1.59909	4.58e-05	Up
AT2G03140	AT2G03140	AT2G03140	1.59646	5.67e-06	Up
AT1G32415	AT1G32415	AT1G32415	1.59615	0.0158213	Up
AT1G59510	CF9	AT1G59510	1.59485	0.000231985	Up
AT5G25620	YUC6	AT5G25620	1.59485	0.00504166	Up
AT3G05670	AT3G05670	AT3G05670	1.59043	2.51e-07	Up
AT5G04740	ACR12	AT5G04740	1.5897	2.6e-08	Up
AT4G12240	AT4G12240	AT4G12240	1.58835	0.00787329	Up
AT1G03620	AT1G03620	AT1G03620	1.5866	0.0480041	Up
AT5G56980	AT5G56980	AT5G56980	1.58472	0.0382508	Up
AT4G39160	AT4G39160	AT4G39160	1.58419	0.000103551	Up
AT1G55250	HUB2	AT1G55250	1.5829	5.72e-06	Up
AT2G47620	SWI3A	AT2G47620	1.58272	2.44e-05	Up
AT5G39050	PMAT1	AT5G39050	1.58204	0.0257656	Up
AT4G02710	NET1C	AT4G02710	1.58049	0.00787775	Up
AT5G65240	AT5G65240	AT5G65240	1.58001	2.56e-05	Up
AT2G18950	HPT1	AT2G18950	1.57354	1.7e-05	Up
AT5G59210	AT5G59210	AT5G59210	1.57267	2.08e-13	Up
AT1G78420	AT1G78420	AT1G78420	1.5726	0.000524858	Up
AT2G02880	AT2G02880	AT2G02880	1.57175	3.16e-07	Up
AT3G26890	AT3G26890	AT3G26890	1.5716	3.59e-05	Up
AT3G21240	4CL2	AT3G21240	1.57131	0.00905556	Up
AT2G21660	GRP7	AT2G21660	1.5712	0.00728261	Up
AT2G36340	AT2G36340	AT2G36340	1.57003	0.00498403	Up
AT2G12190	AT2G12190	AT2G12190	1.56967	0.00566456	Up
AT4G31160	DCAF1	AT4G31160	1.56679	1.25e-05	Up
AT3G19170	PREP1	AT3G19170	1.56638	1.63e-13	Up
AT3G05190	AT3G05190	AT3G05190	1.56596	0.0225332	Up
AT5G65470	AT5G65470	AT5G65470	1.56471	4.66e-06	Up
AT3G53210	UMAMIT6	AT3G53210	1.56345	0.0413644	Up
AT5G64990	RABH1a	AT5G64990	1.56328	0.0324871	Up
AT3G03450	RGL2	AT3G03450	1.56073	0.00118825	Up
AT5G24320	AT5G24320	AT5G24320	1.56054	4.99e-05	Up
AT4G17060	FIP2 AT4G17060	AT4G17060	1.56022	1.4e-07	Up
AT5G52510	SCL8	AT5G52510	1.55788	2.31e-09	Up
AT5G05380	PRA1.B3	AT5G05380	1.55714	4.65e-05	Up
AT1G61000	AT1G61000	AT1G61000	1.55655	0.00396032	Up
AT2G36410	AT2G36410	AT2G36410	1.55629	6.82e-06	Up
AT2G27510	FD3	AT2G27510	1.55625	1.46e-07	Up
AT1G25250	IDD16	AT1G25250	1.55441	0.00954879	Up
AT1G03960	AT1G03960	AT1G03960	1.55379	0.000320434	Up
AT2G37470	AT2G37470	AT2G37470	1.55305	0.00740761	Up
AT1G06750	AT1G06750	AT1G06750	1.55141	0.0305401	Up
AT5G02065	AT5G02065	AT5G02065	1.5497	0.0159209	Up
AT1G68490	AT1G68490	AT1G68490	1.54936	2.16e-09	Up
AT5G53730	AT5G53730	AT5G53730	1.54774	0.00507845	Up
AT1G15405	AT1G15405	AT1G15405	1.54595	0.0192728	Up
AT5G43740	AT5G43740	AT5G43740	1.54556	8.94e-06	Up
AT4G22760	AT4G22760	AT4G22760	1.54518	0.0189864	Up
AT2G01330	AT2G01330	AT2G01330	1.54327	0.00226896	Up
AT1G12480	OZS1	AT1G12480	1.54076	0.0340412	Up
AT2G32120	HSP70T-2	AT2G32120	1.5395	0.024897	Up
AT4G03250	AT4G03250	AT4G03250	1.53904	0.000827327	Up
AT5G47560	TDT	AT5G47560	1.53845	0.0242589	Up
AT1G45248	AT1G45248	AT1G45248	1.5384	0.000672179	Up
AT1G68550	CRF10	AT1G68550	1.53744	0.00246088	Up
AT2G48010	RKF3	AT2G48010	1.53716	0.00328124	Up
AT5G49410	AT5G49410	AT5G49410	1.53686	0.00624198	Up
AT1G29220	AT1G29220	AT1G29220	1.53651	5.21e-06	Up
AT5G06750	AT5G06750	AT5G06750	1.53505	0.00202731	Up
AT3G57770	AT3G57770	AT3G57770	1.5342	0.0498177	Up
AT5G41020	AT5G41020	AT5G41020	1.53214	5.4e-05	Up
AT1G71330	NAP5	AT1G71330	1.53186	0.0146721	Up
AT5G58760	DDB2	AT5G58760	1.53167	2.32e-07	Up
AT1G55920	SERAT2;1	AT1G55920	1.5315	0.0021747	Up
AT5G01720	AT5G01720	AT5G01720	1.53074	0.0066855	Up
AT4G06225	AT4G06225	AT4G06225	1.53043	0.0227233	Up
AT5G26610	AT5G26610	AT5G26610	1.52797	3.72e-10	Up
AT3G26920	AT3G26920	AT3G26920	1.52778	4.21e-06	Up
AT4G10930	AT4G10930	AT4G10930	1.52543	9.86e-06	Up
AT1G32340	NHL8	AT1G32340	1.52072	0.000804664	Up
AT1G29030	AT1G29030	AT1G29030	1.51964	0.00066561	Up
AT1G44910	PRP40A	AT1G44910	1.51921	1.61e-08	Up
AT5G14620	DRM2	AT5G14620	1.519	8.14e-05	Up
AT4G27070	TSB2	AT4G27070	1.51807	0.00151034	Up
AT2G32770	PAP13	AT2G32770	1.51797	0.0366203	Up
AT1G02880	TPK1	AT1G02880	1.51693	6.18e-05	Up
AT1G77470	RFC3 AT1G77470	AT1G77470	1.51562	7.36e-05	Up
AT5G03700	AT5G03700	AT5G03700	1.51429	0.0110529	Up
AT3G03550	AT3G03550	AT3G03550	1.51379	0.000105104	Up
AT3G14270	FAB1B	AT3G14270	1.51375	1.61e-05	Up
AT5G61460	MIM	AT5G61460	1.51335	0.0386663	Up
AT4G02410	AT4G02410	AT4G02410	1.5127	0.00889274	Up
AT1G77840	AT1G77840	AT1G77840	1.51262	0.000104619	Up
AT3G12640	AT3G12640	AT3G12640	1.5121	9.18e-06	Up
AT5G26680	AT5G26680	AT5G26680	1.51114	0.00545842	Up
AT1G27180	AT1G27180	AT1G27180	1.51072	0.000127118	Up
AT2G18000	TAF14	AT2G18000	1.51047	0.040956	Up
AT3G25840	AT3G25840	AT3G25840	1.51032	4.12e-05	Up
AT4G11160	AT4G11160	AT4G11160	1.50964	3.82e-07	Up
AT3G50690	AT3G50690	AT3G50690	1.50844	2.97e-06	Up
AT1G61860	AT1G61860	AT1G61860	1.50829	0.00378382	Up
AT3G02210	COBL1	AT3G02210	1.50798	0.0013078	Up
AT1G64180	AT1G64180	AT1G64180	1.5037	0.00493238	Up
AT3G57530	CPK32	AT3G57530	1.50292	0.0121821	Up
AT5G06100	MYB33	AT5G06100	1.5015	5.6e-05	Up
AT5G03890	AT5G03890	AT5G03890	1.50129	0.0250238	Up
AT5G03255	AT5G03255	AT5G03255	1.49976	0.0447799	Up
AT4G00940	AT4G00940	AT4G00940	1.49855	0.00150237	Up
AT3G22942	AGG2	AT3G22942	1.49657	0.00025964	Up
AT5G58040	FIP1[V]	AT5G58040	1.49353	0.00117613	Up
AT1G77570	AT1G77570	AT1G77570	1.49348	0.0180328	Up
AT2G17430	MLO7	AT2G17430	1.49256	0.00625783	Up
AT1G27900	AT1G27900	AT1G27900	1.49253	2.4e-09	Up
AT5G08170	EMB1873	AT5G08170	1.49022	1.91e-08	Up
AT5G25130	CYP71B12	AT5G25130	1.49	0.0204733	Up
AT3G49601	AT3G49601	AT3G49601	1.48944	6.14e-06	Up
AT4G11660	AT-HSFB2B	AT4G11660	1.48917	9.34e-05	Up
AT1G52530	AT1G52530	AT1G52530	1.48739	0.0471796	Up
AT5G38220	AT5G38220	AT5G38220	1.48624	3.74e-09	Up
AT5G27520	PNC2	AT5G27520	1.48565	0.0194935	Up
AT1G09140	SR30	AT1G09140	1.48513	2.03e-07	Up
AT1G55530	AT1G55530	AT1G55530	1.48321	1.67e-09	Up
AT5G54930	AT5G54930	AT5G54930	1.48265	0.0221478	Up
AT4G26630	AT4G26630	AT4G26630	1.48155	3.88e-08	Up
AT3G55730	MYB109	AT3G55730	1.4812	0.00074106	Up
AT1G56145	AT1G56145	AT1G56145	1.48097	0.0125888	Up
AT3G56720	AT3G56720	AT3G56720	1.48083	0.000395716	Up
AT4G14096	AT4G14096	AT4G14096	1.48048	0.000555583	Up
AT5G25060	RRC1	AT5G25060	1.47952	1.95e-07	Up
AT2G28740	HIS4	AT2G28740	1.4795	0.0225675	Up
AT5G26770	AT5G26770	AT5G26770	1.47882	0.0135093	Up
AT1G31930	XLG3	AT1G31930	1.47862	0.000181368	Up
AT2G20110	AT2G20110	AT2G20110	1.47794	0.0472907	Up
AT1G80300	NTT1	AT1G80300	1.47628	3.78e-07	Up
AT1G22190	AT1G22190	AT1G22190	1.47494	0.00654927	Up
AT1G10580	AT1G10580	AT1G10580	1.47475	0.00024803	Up
AT5G05520	AT5G05520	AT5G05520	1.47466	0.000135166	Up
AT1G09533	AT1G09533	AT1G09533	1.47426	0.0132837	Up
AT1G27630	CYCT1;3	AT1G27630	1.47371	0.000158381	Up
AT1G01770	AT1G01770	AT1G01770	1.47263	0.00193501	Up
AT5G15260	AT5G15260	AT5G15260	1.4725	8.92e-05	Up
AT3G07860	AT3G07860	AT3G07860	1.47215	0.0156202	Up
AT4G33490	AT4G33490	AT4G33490	1.47206	8.06e-05	Up
AT5G26040	HDA2	AT5G26040	1.4707	0.0264145	Up
AT5G22350	ELM1	AT5G22350	1.47027	1.91e-06	Up
AT5G09800	AT5G09800	AT5G09800	1.46824	0.0472907	Up
AT5G14105	AT5G14105	AT5G14105	1.46782	0.000234893	Up
AT1G05163	AT1G05163	AT1G05163	1.46625	0.0251106	Up
AT5G04540	MTM2	AT5G04540	1.46607	0.000359923	Up
AT4G30560	CNGC9	AT4G30560	1.46532	0.0184585	Up
AT5G49900	AT5G49900	AT5G49900	1.46524	0.00529579	Up
AT4G19645	AT4G19645	AT4G19645	1.46446	0.0310426	Up
AT5G16910	CSLD2	AT5G16910	1.46202	0.00195599	Up
AT4G17410	AT4G17410	AT4G17410	1.4619	8.1e-05	Up
AT1G03380	ATG18G	AT1G03380	1.46034	0.000383426	Up
AT4G32320	APX6	AT4G32320	1.4603	3.5e-09	Up
AT4G19040	EDR2	AT4G19040	1.45943	1.5e-08	Up
AT2G28200	AT2G28200	AT2G28200	1.45922	0.000283085	Up
AT5G19440	AT5G19440	AT5G19440	1.45692	3.69e-05	Up
AT2G01480	AT2G01480	AT2G01480	1.45655	4.3e-07	Up
AT1G32630	AT1G32630	AT1G32630	1.45652	3.24e-05	Up
AT5G54890	AT5G54890	AT5G54890	1.45513	0.000302177	Up
AT1G04300	AT1G04300	AT1G04300	1.45482	6.41e-05	Up
AT1G72040	dNK	AT1G72040	1.45374	0.00145501	Up
AT4G32050	AT4G32050	AT4G32050	1.45364	0.0016325	Up
AT1G10930	RECQ4A	AT1G10930	1.45306	0.0200221	Up
AT4G32250	AT4G32250	AT4G32250	1.45297	0.000856459	Up
AT3G12830	AT3G12830	AT3G12830	1.45091	0.0374167	Up
AT3G14610	CYP72A7	AT3G14610	1.45059	0.00965627	Up
AT5G09595	AT5G09595	AT5G09595	1.45033	0.00110446	Up
AT2G21430	AT2G21430	AT2G21430	1.44729	0.0202428	Up
AT1G07790	HTB1	AT1G07790	1.4461	2.82e-06	Up
AT4G19110	AT4G19110	AT4G19110	1.4437	4.83e-16	Up
AT4G09990	GXM2	AT4G09990	1.44124	0.0319377	Up
AT4G39363	AT4G39363	AT4G39363	1.44077	0.0203459	Up
AT1G65280	AT1G65280	AT1G65280	1.44028	1.2e-05	Up
AT5G63800	MUM2	AT5G63800	1.43951	0.0403628	Up
AT5G52530	AT5G52530	AT5G52530	1.43872	2.22e-05	Up
AT1G60830	AT1G60830	AT1G60830	1.43817	0.00144131	Up
AT1G55320	AAE18	AT1G55320	1.43732	0.0106809	Up
AT2G37520	AT2G37520	AT2G37520	1.43643	4.06e-06	Up
AT4G33540	AT4G33540	AT4G33540	1.43607	0.0272174	Up
AT5G22220	E2F1	AT5G22220	1.43519	0.000880237	Up
AT3G19990	AT3G19990	AT3G19990	1.43434	0.00472278	Up
AT3G57450	AT3G57450	AT3G57450	1.43377	0.0357121	Up
AT3G21650	AT3G21650	AT3G21650	1.43348	0.00389897	Up
AT5G26749	AT5G26749	AT5G26749	1.43293	0.0275424	Up
AT5G45100	BRG1	AT5G45100	1.43281	0.000456612	Up
AT4G21215	AT4G21215	AT4G21215	1.43208	0.000298285	Up
AT1G09687	ath-MIR4228	AT1G09687	1.43195	0.000426689	Up
AT1G55280	AT1G55280	AT1G55280	1.43153	0.00426269	Up
AT3G58630	AT3G58630	AT3G58630	1.43092	3.83e-06	Up
AT4G35940	AT4G35940	AT4G35940	1.43062	0.00045127	Up
AT3G22660	AT3G22660	AT3G22660	1.43013	0.0208108	Up
AT3G10400	U11/U12-31K	AT3G10400	1.42874	0.000756659	Up
AT3G51960	BZIP24	AT3G51960	1.42871	0.00125296	Up
AT5G66540	AT5G66540	AT5G66540	1.42842	0.0042134	Up
AT5G50240	PIMT2	AT5G50240	1.42785	0.0078095	Up
AT3G03140	AT3G03140	AT3G03140	1.42751	0.000362169	Up
AT1G28570	AT1G28570	AT1G28570	1.42681	0.0160627	Up
AT2G36740	SWC2	AT2G36740	1.42572	3.48e-07	Up
AT1G48310	CHR18	AT1G48310	1.42409	0.000362727	Up
AT1G14970	AT1G14970	AT1G14970	1.42099	0.0494161	Up
AT2G07305	AT2G07305	AT2G07305	1.42083	0.00625891	Up
AT4G35070	AT4G35070	AT4G35070	1.41999	0.0235148	Up
AT2G03150	emb1579	AT2G03150	1.41954	6.95e-08	Up
AT5G67480	BT4	AT5G67480	1.41923	0.00979479	Up
AT1G60640	AT1G60640	AT1G60640	1.41771	0.00144499	Up
AT2G18760	CHR8	AT2G18760	1.41768	0.015544	Up
AT1G01780	PLIM2b	AT1G01780	1.41454	0.000525752	Up
AT3G04130	AT3G04130	AT3G04130	1.41439	0.0155393	Up
AT2G23140	PUB4	AT2G23140	1.41284	2.83e-06	Up
AT5G50110	AT5G50110	AT5G50110	1.41173	3.72e-05	Up
AT4G25710	AT4G25710	AT4G25710	1.41127	0.00647351	Up
AT5G57110	ACA8 AT5G57110	AT5G57110	1.41107	0.0103077	Up
AT4G11547	AT4G11547	AT4G11547	1.4107	0.0358797	Up
AT4G14790	ATSUV3	AT4G14790	1.4106	0.000534352	Up
AT5G54730	G18F	AT5G54730	1.41058	0.00385973	Up
AT5G41100	AT5G41100	AT5G41100	1.41	0.0469858	Up
AT1G74456	AT1G74456	AT1G74456	1.40971	0.0305736	Up
AT3G04770	RPSAb	AT3G04770	1.40945	0.0378891	Up
AT5G24030	SLAH3	AT5G24030	1.4094	0.0358797	Up
AT2G23040	AT2G23040	AT2G23040	1.40927	0.00362961	Up
AT5G67320	HOS15	AT5G67320	1.4092	2.03e-05	Up
AT5G35370	AT5G35370	AT5G35370	1.40871	0.0134844	Up
AT2G42650	AT2G42650	AT2G42650	1.40831	0.0224976	Up
AT5G50990	AT5G50990	AT5G50990	1.40666	0.0211751	Up
AT2G34790	MEE23	AT2G34790	1.4065	0.0218531	Up
AT1G65840	PAO4	AT1G65840	1.40643	0.000803781	Up
AT3G10370	SDP6	AT3G10370	1.40639	5.2e-09	Up
AT5G08630	AT5G08630	AT5G08630	1.40483	0.000226116	Up
AT3G22750	AT3G22750	AT3G22750	1.4047	0.00612879	Up
AT5G12360	AT5G12360	AT5G12360	1.40451	0.0162673	Up
AT4G19191	AT4G19191	AT4G19191	1.40361	0.0390828	Up
AT1G65660	SMP1 AT1G65660	AT1G65660	1.40312	1.26e-05	Up
AT4G17483	AT4G17483	AT4G17483	1.40206	0.0355472	Up
AT3G09360	AT3G09360	AT3G09360	1.40197	4.62e-07	Up
AT5G42050	AT5G42050	AT5G42050	1.40071	0.019536	Up
AT3G09863	AT3G09863	AT3G09863	1.3985	0.0409814	Up
AT3G54750	AT3G54750	AT3G54750	1.39805	0.017178	Up
AT3G12730	AT3G12730	AT3G12730	1.39593	0.000684739	Up
AT1G63010	AT1G63010	AT1G63010	1.39577	1.99e-07	Up
AT3G23170	AT3G23170	AT3G23170	1.39414	0.0241623	Up
AT3G04020	AT3G04020	AT3G04020	1.39373	3.47e-05	Up
AT5G22100	AT5G22100	AT5G22100	1.3934	0.0134855	Up
AT5G63370	AT5G63370	AT5G63370	1.39317	0.00156473	Up
AT4G39140	AT4G39140	AT4G39140	1.39139	0.000518618	Up
AT1G27760	SAT32	AT1G27760	1.39108	0.000373283	Up
AT1G61275	U12	AT1G61275	1.39008	0.0232156	Up
AT5G60370	AT5G60370	AT5G60370	1.38967	5.48e-05	Up
AT5G47090	AT5G47090	AT5G47090	1.38901	0.000938924	Up
AT2G43980	ITPK4	AT2G43980	1.38817	6.06e-07	Up
AT5G54470	BBX29	AT5G54470	1.38722	0.00559211	Up
AT5G49500	AT5G49500	AT5G49500	1.38709	0.00482147	Up
AT5G53920	AT5G53920	AT5G53920	1.38663	0.0195497	Up
AT1G17550	HAB2	AT1G17550	1.3854	0.000201939	Up
AT2G46550	AT2G46550	AT2G46550	1.38538	1.76e-06	Up
AT3G05932	AT3G05932	AT3G05932	1.38538	1.49e-05	Up
AT2G45600	AT2G45600	AT2G45600	1.38531	0.00900889	Up
AT1G55190	PRA7	AT1G55190	1.3853	5.17e-12	Up
AT3G04520	THA2	AT3G04520	1.38338	0.000418854	Up
AT5G62620	AT5G62620	AT5G62620	1.38201	0.00112913	Up
AT1G21690	EMB1968	AT1G21690	1.38028	0.00232651	Up
AT4G10040	CYTC-2	AT4G10040	1.37959	1.32e-06	Up
AT4G20300	AT4G20300	AT4G20300	1.37816	1.64e-10	Up
AT4G20930	AT4G20930	AT4G20930	1.37495	0.0058302	Up
AT2G37500	AT2G37500	AT2G37500	1.37482	0.000124568	Up
AT2G15270	AT2G15270	AT2G15270	1.37454	7.25e-06	Up
AT2G31560	AT2G31560	AT2G31560	1.37404	9.27e-05	Up
AT5G17900	AT5G17900	AT5G17900	1.37379	3.43e-05	Up
AT1G74453	AT1G74453	AT1G74453	1.37346	0.0092045	Up
AT2G28130	AT2G28130	AT2G28130	1.37323	0.00842604	Up
AT3G05380	ALY2	AT3G05380	1.37321	0.00364969	Up
AT5G23050	AAE17	AT5G23050	1.37258	0.00546631	Up
AT5G26600	AT5G26600	AT5G26600	1.372	6.67e-07	Up
AT2G24260	LRL1	AT2G24260	1.3719	0.000142276	Up
AT2G44950	HUB1	AT2G44950	1.36816	6.15e-06	Up
AT2G01150	RHA2B	AT2G01150	1.36511	0.0169138	Up
AT3G05040	HST AT3G05040	AT3G05040	1.3649	5.55e-06	Up
AT1G07740	AT1G07740	AT1G07740	1.36453	0.0212429	Up
AT1G11710	AT1G11710	AT1G11710	1.36435	0.0390828	Up
AT3G19508	AT3G19508	AT3G19508	1.36321	0.000114466	Up
AT2G27990	BLH8	AT2G27990	1.36203	0.0140841	Up
AT5G05630	RMV1	AT5G05630	1.36188	0.0307961	Up
AT5G59920	ULI3	AT5G59920	1.36045	0.00267636	Up
AT4G15550	IAGLU	AT4G15550	1.36022	0.0361436	Up
AT1G55820	AT1G55820	AT1G55820	1.35975	0.0266913	Up
AT5G46720	AT5G46720	AT5G46720	1.35797	1.59e-05	Up
AT3G61570	GDAP1	AT3G61570	1.35736	7.73e-05	Up
AT3G54130	AT3G54130	AT3G54130	1.3554	0.00095639	Up
AT5G22270	AT5G22270	AT5G22270	1.35496	0.0339064	Up
AT1G69526	AT1G69526	AT1G69526	1.35442	0.0063724	Up
AT5G67180	TOE3	AT5G67180	1.35438	0.00622197	Up
AT5G16780	DOT2	AT5G16780	1.35398	9.6e-07	Up
AT1G50300	TAF15	AT1G50300	1.35312	9.41e-05	Up
AT1G71360	AT1G71360	AT1G71360	1.35297	6.84e-05	Up
AT1G44100	AAP5	AT1G44100	1.35279	0.00883179	Up
AT3G56850	AREB3	AT3G56850	1.35246	2.13e-09	Up
AT3G24740	AT3G24740	AT3G24740	1.35223	7.23e-06	Up
AT5G46910	AT5G46910	AT5G46910	1.35167	0.0448559	Up
AT4G17895	UBP20	AT4G17895	1.35132	0.00047371	Up
AT1G26580	AT1G26580	AT1G26580	1.35058	4.33e-05	Up
AT1G59910	AT1G59910	AT1G59910	1.34989	0.0440948	Up
AT5G02640	AT5G02640	AT5G02640	1.34866	0.0496193	Up
AT5G23590	AT5G23590	AT5G23590	1.34838	1.39e-05	Up
AT1G53110	AT1G53110	AT1G53110	1.34806	0.00639515	Up
AT5G22010	RFC1	AT5G22010	1.34717	1.82e-09	Up
AT4G26270	PFK3	AT4G26270	1.34596	0.0427109	Up
AT2G25680	MOT1	AT2G25680	1.34595	0.00807993	Up
AT3G18300	AT3G18300	AT3G18300	1.34523	6.44e-05	Up
AT1G20100	AT1G20100	AT1G20100	1.3452	0.00166779	Up
AT1G72360	ERF73	AT1G72360	1.345	0.0494135	Up
AT1G79390	AT1G79390	AT1G79390	1.34252	1.1e-05	Up
AT3G27010	TCP20	AT3G27010	1.34221	0.00434869	Up
AT4G16110	AT4G16110	AT4G16110	1.34177	0.000823162	Up
AT1G11910	APA1	AT1G11910	1.34038	1.26e-05	Up
AT2G16700	ADF5	AT2G16700	1.33895	0.00171601	Up
AT5G11350	AT5G11350	AT5G11350	1.33731	1.09e-05	Up
AT5G63580	FLS2 AT5G63580	AT5G63580	1.33704	0.0136845	Up
AT1G03910	AT1G03910	AT1G03910	1.33669	1.17e-05	Up
AT1G07350	SR45a	AT1G07350	1.33627	3.34e-05	Up
AT4G19960	KUP9	AT4G19960	1.33517	0.00688905	Up
AT5G15240	AT5G15240	AT5G15240	1.33489	0.0190102	Up
AT1G13390	AT1G13390	AT1G13390	1.33483	0.00998192	Up
AT1G47128	RD21A	AT1G47128	1.33384	0.00294924	Up
AT1G63250	AT1G63250	AT1G63250	1.33241	0.0294776	Up
AT4G00760	APRR8	AT4G00760	1.33213	0.00113295	Up
AT5G53220	AT5G53220	AT5G53220	1.33163	0.00241861	Up
AT5G22850	AT5G22850	AT5G22850	1.33126	0.000106931	Up
AT5G09420	TOC64-V	AT5G09420	1.3309	0.0188509	Up
AT3G62300	DUF7	AT3G62300	1.33022	0.00229784	Up
AT4G32070	Phox4	AT4G32070	1.33007	0.000396283	Up
AT4G26055	AT4G26055	AT4G26055	1.32874	0.0196462	Up
AT2G14120	DRP3B	AT2G14120	1.32838	3.49e-10	Up
AT1G20920	AT1G20920	AT1G20920	1.32826	0.00291161	Up
AT5G46840	AT5G46840	AT5G46840	1.32665	0.0171087	Up
AT1G14530	THH1	AT1G14530	1.32607	0.000935345	Up
AT5G26760	AT5G26760	AT5G26760	1.32574	0.000582484	Up
AT1G53030	AT1G53030	AT1G53030	1.32547	0.000116643	Up
AT5G42060	AT5G42060	AT5G42060	1.32518	6.41e-06	Up
AT2G21630	AT2G21630	AT2G21630	1.32416	0.00410003	Up
AT1G15280	AT1G15280	AT1G15280	1.3241	1.57e-07	Up
AT2G22720	AT2G22720	AT2G22720	1.32387	1.53e-06	Up
AT1G68790	LINC3	AT1G68790	1.32252	7.96e-07	Up
AT1G21410	SKP2A	AT1G21410	1.32235	0.00335506	Up
AT1G52570	PLDALPHA2	AT1G52570	1.31996	0.0194629	Up
AT4G35785	AT4G35785	AT4G35785	1.31954	2.4e-06	Up
AT4G13750	NOV	AT4G13750	1.31935	0.0348591	Up
AT5G16040	AT5G16040	AT5G16040	1.31905	0.00323567	Up
AT5G26860	LON1	AT5G26860	1.31884	0.00952401	Up
AT4G16535	AT4G16535	AT4G16535	1.31882	0.00279379	Up
AT5G10730	AT5G10730	AT5G10730	1.31829	6.05e-06	Up
AT5G17570	AT5G17570	AT5G17570	1.3182	0.00034779	Up
AT1G25275	AT1G25275	AT1G25275	1.31679	0.00264268	Up
AT3G63000	NPL41	AT3G63000	1.31521	2.91e-07	Up
AT3G05050	AT3G05050	AT3G05050	1.31465	0.000107668	Up
AT3G57910	AT3G57910	AT3G57910	1.31316	0.000354882	Up
AT4G32208	AT4G32208	AT4G32208	1.3127	6.9e-07	Up
AT5G16450	AT5G16450	AT5G16450	1.31242	9.03e-05	Up
AT5G52545	AT5G52545	AT5G52545	1.3121	0.00243029	Up
AT4G18800	RABA1d	AT4G18800	1.31208	2.4e-05	Up
AT3G66652	AT3G66652	AT3G66652	1.31124	0.000793463	Up
AT3G24929	AT3G24929	AT3G24929	1.31045	0.0162775	Up
AT3G46440	UXS5	AT3G46440	1.31032	0.000195703	Up
AT1G76060	EMB1793	AT1G76060	1.31026	6.02e-05	Up
AT5G40550	SGF29b	AT5G40550	1.30947	0.00741661	Up
AT2G25760	AT2G25760	AT2G25760	1.3088	2.3e-07	Up
AT4G02405	AT4G02405	AT4G02405	1.30879	0.000755395	Up
AT2G39260	AT2G39260	AT2G39260	1.30779	5.72e-06	Up
AT1G28560	SRD2	AT1G28560	1.306	0.0186545	Up
AT5G06420	AT5G06420	AT5G06420	1.30529	0.0136884	Up
AT3G05550	AT3G05550	AT3G05550	1.30268	0.0209929	Up
AT3G53280	CYP71B5	AT3G53280	1.30226	0.000124568	Up
AT3G46668	AT3G46668	AT3G46668	1.30217	0.0152497	Up
AT5G02470	DPA	AT5G02470	1.3013	0.000124358	Up
AT5G63000	AT5G63000	AT5G63000	1.29917	9.3e-07	Up
AT1G69410	ELF5A-3	AT1G69410	1.29758	0.0119518	Up
AT5G47100	CBL9	AT5G47100	1.29696	4.89e-05	Up
AT1G06573	AT1G06573	AT1G06573	1.29685	0.00088564	Up
AT4G02070	MSH6	AT4G02070	1.29501	0.015238	Up
AT3G61800	AT3G61800	AT3G61800	1.29327	0.0217533	Up
AT2G30945	AT2G30945	AT2G30945	1.29316	0.000811576	Up
AT5G01935	AT5G01935	AT5G01935	1.29304	0.0319478	Up
AT1G58470	RBP1	AT1G58470	1.29271	0.00720508	Up
AT1G53760	AT1G53760	AT1G53760	1.29128	0.00266002	Up
AT4G01710	CRK AT4G01710	AT4G01710	1.28979	6.31e-06	Up
AT5G15540	EMB2773	AT5G15540	1.28817	0.00103602	Up
AT3G61420	AT3G61420	AT3G61420	1.2881	0.00206241	Up
AT5G44180	RLT2	AT5G44180	1.28702	0.000189734	Up
AT4G24900	TTL AT4G24900	AT4G24900	1.28701	0.00139007	Up
AT4G24740	FC2 AT4G24740	AT4G24740	1.2864	3.18e-06	Up
AT4G18010	IP5PII	AT4G18010	1.28617	0.0226793	Up
AT4G37090	AT4G37090	AT4G37090	1.28613	0.00370846	Up
AT4G21550	VAL3	AT4G21550	1.28497	0.0462913	Up
AT4G10070	AT4G10070	AT4G10070	1.28465	0.00682834	Up
AT5G23680	AT5G23680	AT5G23680	1.28386	3.22e-05	Up
AT5G62990	emb1692	AT5G62990	1.28357	0.00908219	Up
AT3G47833	SDH7 AT3G47833	AT3G47833	1.2834	4.13e-07	Up
AT5G38840	AT5G38840	AT5G38840	1.28148	0.000142289	Up
AT5G60590	AT5G60590	AT5G60590	1.28088	1.24e-05	Up
AT2G17787	AT2G17787	AT2G17787	1.2795	0.00229229	Up
AT4G33440	AT4G33440	AT4G33440	1.27867	0.00736557	Up
AT5G37720	ALY4	AT5G37720	1.27844	6.95e-05	Up
AT5G57840	AT5G57840	AT5G57840	1.27832	0.0192396	Up
AT1G55510	BCDH BETA1	AT1G55510	1.27821	0.0012357	Up
AT3G17740	AT3G17740	AT3G17740	1.27815	0.000636116	Up
AT3G51090	AT3G51090	AT3G51090	1.2776	0.00416735	Up
AT5G16120	AT5G16120	AT5G16120	1.27704	0.000613889	Up
AT2G33820	MBAC1	AT2G33820	1.27623	0.0369619	Up
AT5G50960	NBP35	AT5G50960	1.27422	0.00191322	Up
AT5G20000	AT5G20000	AT5G20000	1.26986	8.3e-05	Up
AT1G71110	AT1G71110	AT1G71110	1.26884	0.00297568	Up
AT2G21060	GRP2B	AT2G21060	1.2686	0.0235328	Up
AT1G55080	MED9	AT1G55080	1.26829	0.000106168	Up
AT1G49530	GGPS6	AT1G49530	1.26765	0.0263442	Up
AT5G54240	AT5G54240	AT5G54240	1.26738	0.0299271	Up
AT5G02860	AT5G02860	AT5G02860	1.26694	0.00535574	Up
AT5G26731	AT5G26731	AT5G26731	1.26577	0.0159175	Up
AT4G20260	PCAP1	AT4G20260	1.26528	0.0083339	Up
AT1G01830	AT1G01830	AT1G01830	1.26394	0.00689884	Up
AT5G60790	ABCF1	AT5G60790	1.26392	0.0202193	Up
AT4G14990	AT4G14990	AT4G14990	1.26239	4.04e-05	Up
AT3G46450	AT3G46450	AT3G46450	1.25968	9.25e-06	Up
AT1G77810	AT1G77810	AT1G77810	1.25907	0.00583954	Up
AT2G31970	RAD50	AT2G31970	1.25772	0.0001139	Up
AT1G60200	AT1G60200	AT1G60200	1.25678	2.65e-06	Up
AT4G27690	VPS26B	AT4G27690	1.25588	1.83e-06	Up
AT2G33150	PKT3	AT2G33150	1.25562	0.000362169	Up
AT1G12060	BAG5	AT1G12060	1.25552	0.00691341	Up
AT1G02816	AT1G02816	AT1G02816	1.25461	0.00158968	Up
AT3G53720	CHX20	AT3G53720	1.25448	0.0386083	Up
AT4G01610	AT4G01610	AT4G01610	1.25448	0.0301231	Up
AT5G64350	FKBP12	AT5G64350	1.25442	1.11e-09	Up
AT2G26460	SMU2	AT2G26460	1.25362	4.78e-06	Up
AT5G20200	AT5G20200	AT5G20200	1.25244	0.00063313	Up
AT4G25670	AT4G25670	AT4G25670	1.25244	0.00380777	Up
AT4G22240	AT4G22240	AT4G22240	1.25117	0.000245628	Up
AT4G11220	BTI2	AT4G11220	1.24929	9.46e-06	Up
AT1G07240	UGT71C5	AT1G07240	1.24823	0.00100269	Up
AT5G49930	emb1441	AT5G49930	1.24802	6.51e-05	Up
AT5G65720	NFS1	AT5G65720	1.24767	4.95e-07	Up
AT1G16790	AT1G16790	AT1G16790	1.24766	0.00393711	Up
AT4G27120	AT4G27120	AT4G27120	1.24755	2.83e-08	Up
AT1G58180	BCA6	AT1G58180	1.2468	0.0210389	Up
AT4G17650	AT4G17650	AT4G17650	1.24664	2.64e-05	Up
AT4G02140	AT4G02140	AT4G02140	1.24638	0.000715754	Up
AT1G71810	AT1G71810	AT1G71810	1.24635	3.72e-05	Up
AT1G48560	AT1G48560	AT1G48560	1.24603	0.0130532	Up
AT4G24200	AT4G24200	AT4G24200	1.24564	0.000138523	Up
AT1G27700	AT1G27700	AT1G27700	1.24537	0.0171259	Up
AT1G70780	AT1G70780	AT1G70780	1.24522	0.00106675	Up
AT3G19240	AT3G19240	AT3G19240	1.24474	0.0120749	Up
AT5G58470	TAF15b	AT5G58470	1.24435	0.00016181	Up
AT3G18880	AT3G18880	AT3G18880	1.24405	0.0372689	Up
AT3G50210	AT3G50210	AT3G50210	1.24377	0.00755292	Up
AT5G47860	AT5G47860	AT5G47860	1.24361	0.0116173	Up
AT5G16630	RAD4	AT5G16630	1.24333	0.00139931	Up
AT4G30490	AT4G30490	AT4G30490	1.24286	0.0193845	Up
AT1G64940	CYP89A6	AT1G64940	1.24219	0.000320784	Up
AT2G35060	KUP11	AT2G35060	1.24176	0.00171601	Up
AT5G04130	GYRB2	AT5G04130	1.24086	0.00161048	Up
AT4G34140	AT4G34140	AT4G34140	1.24052	0.000697175	Up
AT1G79950	AT1G79950	AT1G79950	1.23981	0.000688141	Up
AT3G62310	AT3G62310	AT3G62310	1.23892	0.0036783	Up
AT4G36080	AT4G36080	AT4G36080	1.23715	0.00140661	Up
AT3G12090	TET6	AT3G12090	1.23676	0.000244606	Up
AT5G50170	AT5G50170	AT5G50170	1.2364	0.0412236	Up
AT4G16670	AT4G16670	AT4G16670	1.23613	0.00155824	Up
AT3G10070	TAF12	AT3G10070	1.23556	0.00385973	Up
AT1G03340	AT1G03340	AT1G03340	1.23478	0.0209288	Up
AT5G17380	AT5G17380	AT5G17380	1.23344	0.000680028	Up
AT1G65430	ARI8	AT1G65430	1.23257	9.91e-07	Up
AT3G20650	AT3G20650	AT3G20650	1.23093	2.56e-05	Up
AT4G26965	AT4G26965	AT4G26965	1.23038	6.14e-06	Up
AT4G03430	EMB2770	AT4G03430	1.22926	0.00877114	Up
AT2G24540	AFR	AT2G24540	1.22924	0.00136974	Up
AT3G07780	OBE1	AT3G07780	1.2288	0.00743223	Up
AT3G15350	AT3G15350	AT3G15350	1.22875	0.00348867	Up
AT5G51130	AT5G51130	AT5G51130	1.22854	0.0403076	Up
AT5G54960	PDC2	AT5G54960	1.22821	0.0261012	Up
AT3G02510	AT3G02510	AT3G02510	1.22812	0.00283004	Up
AT4G21610	LOL2	AT4G21610	1.22803	0.000940647	Up
AT3G59410	GCN2	AT3G59410	1.22789	0.00130185	Up
AT1G78380	GSTU19	AT1G78380	1.22736	0.00834319	Up
AT3G21640	TWD1	AT3G21640	1.22695	1.37e-06	Up
AT4G26600	AT4G26600	AT4G26600	1.22499	0.0420763	Up
AT4G17940	AT4G17940	AT4G17940	1.22403	8.67e-06	Up
AT2G08860	AT2G08860	AT2G08860	1.2238	0.0188309	Up
AT1G17145	AT1G17145	AT1G17145	1.22262	3.48e-05	Up
AT1G09320	AT1G09320	AT1G09320	1.22157	0.0324743	Up
AT5G43730	AT5G43730	AT5G43730	1.22005	0.0032267	Up
AT3G13940	AT3G13940	AT3G13940	1.21995	0.0198219	Up
AT3G63340	AT3G63340	AT3G63340	1.21981	2.29e-07	Up
AT5G09175	AT5G09175	AT5G09175	1.2189	0.00189202	Up
AT1G18030	AT1G18030	AT1G18030	1.2176	0.00172998	Up
AT5G02630	Cand6	AT5G02630	1.21491	0.00145025	Up
ATMG00020	ATMG00020	ATMG00020	1.21454	0.00535235	Up
AT4G23950	AT4G23950	AT4G23950	1.21413	0.0207587	Up
AT1G33520	MOS2	AT1G33520	1.2137	0.000281215	Up
AT2G14460	AT2G14460	AT2G14460	1.21285	0.00386111	Up
AT5G62530	ALDH12A1	AT5G62530	1.21176	1.4e-05	Up
AT3G57120	AT3G57120	AT3G57120	1.21068	0.00533048	Up
AT5G15845	AT5G15845	AT5G15845	1.20956	0.0214968	Up
AT1G17640	AT1G17640	AT1G17640	1.20872	0.000312903	Up
AT1G06570	PDS1	AT1G06570	1.20748	0.0011367	Up
AT1G16300	GAPCP-2	AT1G16300	1.20344	0.0277658	Up
AT1G79630	AT1G79630	AT1G79630	1.20217	0.00186819	Up
AT3G20430	AT3G20430	AT3G20430	1.2019	0.00689498	Up
AT1G76810	AT1G76810	AT1G76810	1.19884	7.51e-06	Up
AT1G05910	AT1G05910	AT1G05910	1.1984	9.24e-06	Up
AT5G61530	AT5G61530	AT5G61530	1.19803	0.0141271	Up
AT3G06740	GATA15	AT3G06740	1.19742	0.0270336	Up
AT2G29140	PUM3	AT2G29140	1.19738	0.00200689	Up
AT1G51340	AT1G51340	AT1G51340	1.19704	0.00583954	Up
AT2G33310	IAA13	AT2G33310	1.19632	0.00175965	Up
AT2G43410	FPA	AT2G43410	1.19583	0.000124953	Up
AT1G22930	AT1G22930	AT1G22930	1.1956	0.0311223	Up
AT2G33700	PP2CG1	AT2G33700	1.19476	0.000990079	Up
AT5G53360	AT5G53360	AT5G53360	1.1939	0.000212667	Up
AT2G01460	AT2G01460	AT2G01460	1.19307	0.00116024	Up
AT5G57230	AT5G57230	AT5G57230	1.19242	0.00129931	Up
AT5G09880	AT5G09880	AT5G09880	1.19148	0.00016765	Up
AT1G25150	AT1G25150	AT1G25150	1.19109	0.000620112	Up
AT2G31960	GSL03	AT2G31960	1.18996	5.44e-08	Up
AT3G48050	SUO	AT3G48050	1.18964	0.000250518	Up
AT4G16144	AMSH3	AT4G16144	1.18886	0.000374573	Up
AT5G07890	AT5G07890	AT5G07890	1.18878	0.0004018	Up
AT1G07910	RNL	AT1G07910	1.1886	0.00119139	Up
AT5G54880	AT5G54880	AT5G54880	1.18815	0.0187882	Up
AT5G11430	AT5G11430	AT5G11430	1.18807	0.000714769	Up
AT4G08510	AT4G08510	AT4G08510	1.1876	0.010139	Up
AT1G30960	AT1G30960	AT1G30960	1.18716	0.0324102	Up
AT4G36210	AT4G36210	AT4G36210	1.18708	5.98e-06	Up
AT3G12030	AT3G12030	AT3G12030	1.18644	7.34e-07	Up
AT5G41370	XPB1	AT5G41370	1.1848	0.000233236	Up
AT2G18260	SYP112	AT2G18260	1.18463	0.00895596	Up
AT3G13780	AT3G13780	AT3G13780	1.18233	0.00888808	Up
AT1G03290	AT1G03290	AT1G03290	1.18221	0.0305544	Up
AT5G03030	AT5G03030	AT5G03030	1.18184	0.000546007	Up
AT5G39380	AT5G39380	AT5G39380	1.1812	0.03433	Up
AT5G04290	KTF1	AT5G04290	1.18101	0.00163892	Up
AT1G06530	PMD2	AT1G06530	1.18075	2.27e-07	Up
AT5G18610	AT5G18610	AT5G18610	1.17972	0.0311367	Up
AT1G51700	DOF1	AT1G51700	1.17901	0.0130702	Up
AT2G14115	AT2G14115	AT2G14115	1.17885	0.000715754	Up
AT4G12610	RAP74	AT4G12610	1.17873	0.00523599	Up
AT4G30780	AT4G30780	AT4G30780	1.17872	0.00243711	Up
AT2G40711	AT2G40711	AT2G40711	1.17775	0.0367021	Up
AT3G01160	AT3G01160	AT3G01160	1.17757	0.0178233	Up
AT1G61730	AT1G61730	AT1G61730	1.17719	0.000176394	Up
AT3G27000	ARP2	AT3G27000	1.17652	9.89e-05	Up
AT1G04280	AT1G04280	AT1G04280	1.17491	0.0328261	Up
AT5G43950	AT5G43950	AT5G43950	1.17453	0.0142731	Up
AT3G06455	AT3G06455	AT3G06455	1.17443	0.0463151	Up
AT4G10925	AT4G10925	AT4G10925	1.17313	5.06e-06	Up
AT4G05010	FBS3	AT4G05010	1.17306	0.0124947	Up
AT4G12000	AT4G12000	AT4G12000	1.17029	0.00699292	Up
AT3G51270	AT3G51270	AT3G51270	1.16988	0.000240924	Up
AT1G79440	ALDH5F1	AT1G79440	1.16928	0.0106058	Up
AT3G11220	ELO1	AT3G11220	1.16862	0.000326568	Up
AT5G20360	Phox3	AT5G20360	1.16851	6.8e-07	Up
AT1G24800	AT1G24800	AT1G24800	1.16681	0.000634028	Up
AT5G13800	PPH	AT5G13800	1.16594	0.00459671	Up
AT5G35680	AT5G35680	AT5G35680	1.16374	2.87e-07	Up
AT5G52980	AT5G52980	AT5G52980	1.16355	0.000739632	Up
AT5G01670	AT5G01670	AT5G01670	1.16215	0.01045	Up
AT3G54140	PTR1	AT3G54140	1.16209	0.000112112	Up
AT1G22360	UGT85A2	AT1G22360	1.16173	0.0212401	Up
AT1G09794	AT1G09794	AT1G09794	1.16088	0.00168798	Up
AT5G57350	HA3	AT5G57350	1.16081	5.56e-05	Up
AT2G20960	pEARLI4	AT2G20960	1.16052	0.0259979	Up
AT5G39590	AT5G39590	AT5G39590	1.15721	0.000934438	Up
AT3G06400	CHR11	AT3G06400	1.15692	2.86e-08	Up
AT1G11592	AT1G11592	AT1G11592	1.15575	0.00190484	Up
AT3G28030	UVH3	AT3G28030	1.1557	0.00251802	Up
AT5G03990	AT5G03990	AT5G03990	1.15525	0.00412094	Up
AT1G62430	CDS1	AT1G62430	1.15478	4.89e-07	Up
AT5G55600	AT5G55600	AT5G55600	1.15351	0.00273647	Up
AT5G38690	AT5G38690	AT5G38690	1.15334	0.0277887	Up
AT4G19860	AT4G19860	AT4G19860	1.1533	0.0219832	Up
AT2G02080	IDD4	AT2G02080	1.15306	0.000398473	Up
AT3G59100	GSL11	AT3G59100	1.15283	0.0498587	Up
AT2G22910	NAGS1	AT2G22910	1.15275	0.000314744	Up
AT1G15940	AT1G15940	AT1G15940	1.15245	0.0044693	Up
AT3G10690	GYRA	AT3G10690	1.1524	0.027147	Up
AT4G26455	WIP1	AT4G26455	1.15215	0.00035184	Up
AT5G49665	AT5G49665	AT5G49665	1.15121	0.0474457	Up
AT1G14330	AT1G14330	AT1G14330	1.15072	0.0273928	Up
AT1G76390	PUB43	AT1G76390	1.15054	0.015621	Up
AT2G06210	AT2G06210	AT2G06210	1.15053	1.21e-05	Up
AT2G31280	CPUORF7	AT2G31280	1.15028	1.42e-06	Up
AT5G08190	NF-YB12	AT5G08190	1.15015	4.21e-05	Up
AT4G19950	AT4G19950	AT4G19950	1.1498	0.00397961	Up
AT4G33950	OST1	AT4G33950	1.14975	0.000365445	Up
AT4G12040	SAP7	AT4G12040	1.14887	6.36e-05	Up
AT1G75170	AT1G75170	AT1G75170	1.14846	0.0271513	Up
AT5G05230	AT5G05230	AT5G05230	1.14802	0.017521	Up
AT1G29760	AT1G29760	AT1G29760	1.14788	0.00542774	Up
AT3G27300	G6PD5	AT3G27300	1.14728	5.64e-09	Up
AT1G29195	AT1G29195	AT1G29195	1.14728	0.0259942	Up
AT4G35540	AT4G35540	AT4G35540	1.14519	0.0291075	Up
AT5G03340	AtCDC48C	AT5G03340	1.14506	3.33e-07	Up
AT1G08710	AT1G08710	AT1G08710	1.14413	0.000342216	Up
AT4G15180	SDG2	AT4G15180	1.14291	0.000977269	Up
AT5G05140	AT5G05140	AT5G05140	1.14285	0.0209254	Up
AT1G35516	AT1G35516	AT1G35516	1.14169	0.00150375	Up
AT3G12130	AT3G12130	AT3G12130	1.14166	1.72e-05	Up
AT3G03320	AT3G03320	AT3G03320	1.14157	0.0161948	Up
AT5G06910	ATJ6	AT5G06910	1.14149	3.86e-05	Up
AT4G23920	UGE2	AT4G23920	1.14146	0.00562355	Up
AT3G01490	AT3G01490	AT3G01490	1.13853	0.0215736	Up
AT5G14780	FDH	AT5G14780	1.13823	0.0231081	Up
AT3G15790	MBD11	AT3G15790	1.13756	0.000424778	Up
AT2G30530	AT2G30530	AT2G30530	1.13609	0.00196753	Up
AT2G31390	AT2G31390	AT2G31390	1.13507	0.000104619	Up
AT1G48780	AT1G48780	AT1G48780	1.13449	0.0206903	Up
AT3G10820	AT3G10820	AT3G10820	1.13352	0.0124678	Up
AT2G37480	AT2G37480	AT2G37480	1.13307	5.12e-05	Up
AT2G21470	SAE2	AT2G21470	1.13249	9.19e-05	Up
AT1G45976	SBP1 AT1G45976	AT1G45976	1.13209	8.18e-05	Up
AT1G52905	AT1G52905	AT1G52905	1.13204	0.00248788	Up
AT4G25320	AT4G25320	AT4G25320	1.13194	0.000794116	Up
AT1G33360	AT1G33360	AT1G33360	1.1315	0.0061183	Up
AT1G55930	AT1G55930	AT1G55930	1.13129	0.00488711	Up
AT1G09910	AT1G09910	AT1G09910	1.13121	0.0411288	Up
AT1G67880	AT1G67880	AT1G67880	1.13061	0.00571565	Up
AT3G44680	HDA9	AT3G44680	1.12925	0.000114636	Up
AT4G15953	AT4G15953	AT4G15953	1.12818	0.0283044	Up
AT1G51720	AT1G51720	AT1G51720	1.12813	0.000105687	Up
AT1G55325	GCT	AT1G55325	1.12783	0.00123969	Up
AT3G53630	AT3G53630	AT3G53630	1.12596	0.00529109	Up
AT3G08840	AT3G08840	AT3G08840	1.12559	1.65e-05	Up
AT3G07020	SGT	AT3G07020	1.12522	8.64e-06	Up
AT5G55200	MGE1	AT5G55200	1.12271	0.0106358	Up
AT1G13120	GLE1	AT1G13120	1.12254	0.000324509	Up
AT3G16840	AT3G16840	AT3G16840	1.1221	0.00153695	Up
AT2G31751	AT2G31751	AT2G31751	1.12124	0.00340508	Up
AT5G06850	FTIP1	AT5G06850	1.12074	0.0223278	Up
AT1G70740	AT1G70740	AT1G70740	1.11988	0.0405548	Up
AT3G05715	AT3G05715	AT3G05715	1.11971	0.0395587	Up
AT3G56860	UBA2A	AT3G56860	1.11898	9.84e-05	Up
AT5G51410	AT5G51410	AT5G51410	1.1185	0.00139931	Up
AT1G47970	AT1G47970	AT1G47970	1.11799	2.13e-05	Up
AT1G44170	ALDH3H1	AT1G44170	1.11713	0.000226994	Up
AT4G08350	GTA2	AT4G08350	1.11664	1.6e-05	Up
AT1G55535	AT1G55535	AT1G55535	1.11563	0.000248084	Up
AT1G58025	AT1G58025	AT1G58025	1.11558	0.00886297	Up
AT5G08510	AT5G08510	AT5G08510	1.1154	0.00824445	Up
AT5G43490	AT5G43490	AT5G43490	1.1153	0.0350288	Up
AT1G28420	HB-1 AT1G28420	AT1G28420	1.11498	0.000182262	Up
AT4G08170	AT4G08170	AT4G08170	1.11469	0.0452805	Up
AT5G64160	AT5G64160	AT5G64160	1.11438	2.88e-05	Up
AT3G55610	P5CS2	AT3G55610	1.11361	0.00338207	Up
ATMG00580	nad4	ATMG00580	1.11235	0.00309184	Up
AT3G47120	AT3G47120	AT3G47120	1.11234	0.0196753	Up
AT3G10860	AT3G10860	AT3G10860	1.1121	8.53e-08	Up
AT1G48920	NUC-L1	AT1G48920	1.11162	0.046785	Up
AT1G15340	MBD10	AT1G15340	1.11086	0.000174241	Up
AT1G27430	AT1G27430	AT1G27430	1.11053	0.000197566	Up
AT1G80930	AT1G80930	AT1G80930	1.10963	1.09e-05	Up
AT3G07610	IBM1	AT3G07610	1.1095	0.00273009	Up
AT4G38120	AT4G38120	AT4G38120	1.10884	0.000933346	Up
AT4G29000	AT4G29000	AT4G29000	1.10843	0.00124008	Up
AT5G65750	AT5G65750	AT5G65750	1.10839	0.000744469	Up
AT5G55500	XYLT	AT5G55500	1.10751	1.07e-06	Up
AT1G61280	AT1G61280	AT1G61280	1.10695	0.0386175	Up
AT5G56190	AT5G56190	AT5G56190	1.10678	0.000974981	Up
AT5G67610	AT5G67610	AT5G67610	1.10566	2.95e-06	Up
AT3G18510	AT3G18510	AT3G18510	1.10548	0.0485335	Up
AT3G54670	TTN8	AT3G54670	1.10469	0.000360331	Up
AT1G50260	NTMC2T5.1	AT1G50260	1.10458	0.0104603	Up
AT2G45880	BAM7	AT2G45880	1.10433	0.000682657	Up
AT1G54410	AT1G54410	AT1G54410	1.10429	0.00433609	Up
AT5G52200	I-2	AT5G52200	1.10426	4.05e-05	Up
AT1G04960	AT1G04960	AT1G04960	1.10278	0.00140102	Up
AT1G32810	AT1G32810	AT1G32810	1.10052	0.00414434	Up
AT2G32340	AT2G32340	AT2G32340	1.10051	0.014165	Up
AT1G66260	AT1G66260	AT1G66260	1.1	0.000691654	Up
AT3G63445	AT3G63445	AT3G63445	1.09916	0.00121827	Up
AT2G44520	COX10	AT2G44520	1.09863	0.000115155	Up
AT3G16785	PLDP1	AT3G16785	1.09837	0.00267101	Up
AT3G14180	ASIL2	AT3G14180	1.09754	0.00251077	Up
AT1G22940	TH1	AT1G22940	1.09751	0.000491346	Up
AT5G40930	TOM20-4	AT5G40930	1.09706	3.23e-06	Up
AT1G50030	TOR	AT1G50030	1.0969	0.00119284	Up
AT1G21920	AT1G21920	AT1G21920	1.09683	0.0371735	Up
AT5G61540	AT5G61540	AT5G61540	1.09644	0.0104015	Up
AT3G08670	AT3G08670	AT3G08670	1.0964	0.00333107	Up
AT5G49945	AT5G49945	AT5G49945	1.09615	0.00419646	Up
AT3G11964	AT3G11964	AT3G11964	1.09607	0.0348017	Up
AT5G65760	AT5G65760	AT5G65760	1.09589	3.59e-05	Up
AT2G16485	NERD	AT2G16485	1.09572	0.000313482	Up
AT5G51040	SDHAF2	AT5G51040	1.09505	3.49e-07	Up
AT3G06190	BPM2	AT3G06190	1.09464	9.98e-05	Up
AT1G54170	CID3	AT1G54170	1.0946	0.000417161	Up
AT1G45150	AT1G45150	AT1G45150	1.09404	0.00923822	Up
AT4G33690	AT4G33690	AT4G33690	1.09382	0.00197531	Up
AT5G01450	APD2	AT5G01450	1.09247	0.00175965	Up
AT5G05560	EMB2771	AT5G05560	1.09246	0.036868	Up
AT3G05510	AT3G05510	AT3G05510	1.09196	0.00539511	Up
AT1G73130	AT1G73130	AT1G73130	1.0913	0.00841142	Up
AT5G10980	AT5G10980	AT5G10980	1.09105	0.00352041	Up
AT2G38550	AT2G38550	AT2G38550	1.08978	4.91e-06	Up
AT2G18750	AT2G18750	AT2G18750	1.08938	0.000280309	Up
AT4G24220	VEP1	AT4G24220	1.08931	0.00183382	Up
AT3G05220	AT3G05220	AT3G05220	1.08931	0.0281778	Up
AT1G48460	AT1G48460	AT1G48460	1.08808	0.00381328	Up
AT5G17280	AT5G17280	AT5G17280	1.08764	1.32e-06	Up
AT1G79280	NUA	AT1G79280	1.08691	0.000113111	Up
AT1G22180	AT1G22180	AT1G22180	1.08674	0.0255547	Up
AT1G30475	AT1G30475	AT1G30475	1.08668	0.0308518	Up
AT1G21790	AT1G21790	AT1G21790	1.08633	0.00559007	Up
AT5G03905	AT5G03905	AT5G03905	1.08584	0.000748541	Up
AT1G06210	AT1G06210	AT1G06210	1.08552	4.04e-07	Up
AT4G19600	CYCT1;4	AT4G19600	1.08539	0.0024643	Up
AT5G44100	ckl7	AT5G44100	1.08459	5.49e-06	Up
AT2G40205	AT2G40205	AT2G40205	1.0836	0.0198487	Up
AT2G14110	AT2G14110	AT2G14110	1.08327	0.00180032	Up
AT2G17270	PHT3;3	AT2G17270	1.08291	0.0287211	Up
AT2G23470	RUS4	AT2G23470	1.08162	0.00965627	Up
AT3G53120	VPS37-1	AT3G53120	1.08121	0.00502467	Up
AT2G20950	AT2G20950	AT2G20950	1.08104	0.00129642	Up
AT5G15470	GAUT14	AT5G15470	1.08089	0.0177506	Up
AT4G13010	AT4G13010	AT4G13010	1.08068	4.39e-05	Up
AT1G15780	NRB4	AT1G15780	1.08021	0.00114741	Up
AT2G20280	AT2G20280	AT2G20280	1.07994	8.37e-09	Up
AT2G22970	SCPL11	AT2G22970	1.07958	0.0109984	Up
AT1G33390	FAS4	AT1G33390	1.07838	0.0109983	Up
AT4G02880	AT4G02880	AT4G02880	1.07782	0.00226178	Up
AT1G08220	AT1G08220	AT1G08220	1.07755	0.00834118	Up
AT3G09720	AT3G09720	AT3G09720	1.07575	0.0495549	Up
AT3G15590	AT3G15590	AT3G15590	1.07538	0.00444693	Up
AT1G17520	AT1G17520	AT1G17520	1.07521	0.000316896	Up
AT3G19895	AT3G19895	AT3G19895	1.07448	0.00318182	Up
AT2G29995	AT2G29995	AT2G29995	1.07362	0.0336105	Up
AT5G62540	UBC3	AT5G62540	1.07362	2.15e-05	Up
AT2G31240	AT2G31240	AT2G31240	1.07349	0.00712797	Up
AT2G28900	OEP16-1	AT2G28900	1.0734	0.0482368	Up
AT3G15120	AT3G15120	AT3G15120	1.07277	0.00347887	Up
AT5G54760	AT5G54760	AT5G54760	1.07264	9.14e-06	Up
AT3G01100	HYP1	AT3G01100	1.07238	0.00242296	Up
AT1G54380	AT1G54380	AT1G54380	1.07233	0.0118063	Up
AT3G08950	HCC1	AT3G08950	1.07219	0.00242128	Up
AT5G01820	SR1 AT5G01820	AT5G01820	1.07167	0.0365785	Up
AT4G30510	ATG18B	AT4G30510	1.07029	0.0015158	Up
AT1G24881	AT1G24881	AT1G24881	1.06984	0.0014762	Up
AT3G58030	AT3G58030	AT3G58030	1.06951	8.92e-05	Up
AT4G21585	ENDO4	AT4G21585	1.06945	0.0397786	Up
AT3G48195	AT3G48195	AT3G48195	1.06936	0.0173205	Up
AT1G17930	AT1G17930	AT1G17930	1.06858	4.47e-05	Up
AT1G31814	FRL2	AT1G31814	1.06834	0.00861866	Up
AT4G00440	TRM15	AT4G00440	1.06668	0.000668308	Up
AT1G79090	AT1G79090	AT1G79090	1.06622	0.000190476	Up
AT5G02590	AT5G02590	AT5G02590	1.0662	0.00358972	Up
AT3G61560	AT3G61560	AT3G61560	1.06615	2.42e-05	Up
AT5G17580	AT5G17580	AT5G17580	1.06576	0.0104059	Up
AT3G58110	AT3G58110	AT3G58110	1.06349	0.000633274	Up
AT5G15400	AT5G15400	AT5G15400	1.06229	1.15e-05	Up
AT2G15900	AT2G15900	AT2G15900	1.06197	0.00238398	Up
AT5G19420	AT5G19420	AT5G19420	1.06155	0.00273647	Up
AT5G47050	AT5G47050	AT5G47050	1.06146	0.0453298	Up
AT4G23050	AT4G23050	AT4G23050	1.06066	0.028023	Up
AT2G03500	AT2G03500	AT2G03500	1.06048	0.0143124	Up
AT3G15420	AT3G15420	AT3G15420	1.06035	0.0191755	Up
AT2G39725	AT2G39725	AT2G39725	1.0601	0.00309184	Up
AT3G54010	PAS1	AT3G54010	1.05978	7.96e-05	Up
AT5G51570	AT5G51570	AT5G51570	1.05897	0.00956601	Up
AT4G05160	AT4G05160	AT4G05160	1.05893	1.86e-05	Up
AT5G49000	AT5G49000	AT5G49000	1.05889	0.00906857	Up
AT4G19060	AT4G19060	AT4G19060	1.05867	0.0155737	Up
AT3G58690	AT3G58690	AT3G58690	1.0586	0.0196153	Up
AT1G48790	AMSH1	AT1G48790	1.05826	1.91e-06	Up
AT5G20910	AIP2	AT5G20910	1.05771	0.00703099	Up
AT2G24040	AT2G24040	AT2G24040	1.05689	0.00249127	Up
AT1G30680	AT1G30680	AT1G30680	1.05664	0.00673095	Up
AT2G29210	AT2G29210	AT2G29210	1.05658	0.00186709	Up
AT1G25055	AT1G25055	AT1G25055	1.05569	0.00173045	Up
AT3G07590	AT3G07590	AT3G07590	1.0554	0.00565547	Up
AT3G15351	AT3G15351	AT3G15351	1.05513	0.000357578	Up
AT3G28690	AT3G28690	AT3G28690	1.05511	0.000526209	Up
AT1G08570	ACHT4	AT1G08570	1.05502	0.0146343	Up
AT4G36720	HVA22K	AT4G36720	1.05368	0.000527958	Up
AT5G16760	ITPK1	AT5G16760	1.05227	1.88e-06	Up
AT1G44820	AT1G44820	AT1G44820	1.05195	0.00241585	Up
AT3G24503	ALDH2C4	AT3G24503	1.04897	0.0157557	Up
AT2G46610	RS31a	AT2G46610	1.04869	0.0159065	Up
AT5G46860	VAM3	AT5G46860	1.04779	0.000306324	Up
AT5G24460	AT5G24460	AT5G24460	1.04718	0.00267257	Up
AT1G61620	AT1G61620	AT1G61620	1.04694	0.000211886	Up
AT3G20780	TOP6B	AT3G20780	1.04597	0.00911516	Up
AT2G26350	PEX10	AT2G26350	1.04585	0.00153437	Up
AT1G27650	ATU2AF35A	AT1G27650	1.04583	0.000205683	Up
AT2G08345	AT2G08345	AT2G08345	1.04581	0.00481699	Up
AT2G19270	AT2G19270	AT2G19270	1.04454	0.000748352	Up
AT1G12700	RPF1	AT1G12700	1.04321	0.0217729	Up
AT1G25520	AT1G25520	AT1G25520	1.04313	0.00512342	Up
AT5G21990	TPR7	AT5G21990	1.04311	1.41e-05	Up
AT2G27090	AT2G27090	AT2G27090	1.04298	0.000711828	Up
AT5G28740	AT5G28740	AT5G28740	1.04199	0.00015314	Up
AT1G24560	AT1G24560	AT1G24560	1.04087	3.74e-06	Up
AT5G27150	NHX1	AT5G27150	1.04009	0.0019452	Up
AT5G64730	AT5G64730	AT5G64730	1.0396	5.54e-05	Up
AT2G21410	VHA-A2	AT2G21410	1.03843	8.99e-07	Up
AT1G20430	AT1G20430	AT1G20430	1.03838	0.00140102	Up
AT5G07950	AT5G07950	AT5G07950	1.03718	0.017539	Up
AT3G27380	SDH2-1	AT3G27380	1.03694	5.92e-07	Up
AT3G06810	IBR3	AT3G06810	1.03673	0.0074345	Up
AT5G08400	AT5G08400	AT5G08400	1.03618	0.0481724	Up
AT1G07720	KCS3	AT1G07720	1.03563	0.0229301	Up
AT5G62440	AT5G62440	AT5G62440	1.03492	0.00662168	Up
AT2G38410	AT2G38410	AT2G38410	1.03488	0.00596991	Up
AT2G40630	AT2G40630	AT2G40630	1.03458	0.012645	Up
AT1G23780	AT1G23780	AT1G23780	1.03451	0.001994	Up
AT5G25900	GA3	AT5G25900	1.03318	0.00858396	Up
AT2G45710	AT2G45710	AT2G45710	1.03316	0.0107206	Up
AT1G79000	HAC1	AT1G79000	1.03237	0.00026762	Up
AT3G49645	AT3G49645	AT3G49645	1.03222	0.00376563	Up
AT5G02850	AT5G02850	AT5G02850	1.03145	0.00466416	Up
AT5G20600	AT5G20600	AT5G20600	1.0308	0.0286806	Up
AT2G41000	AT2G41000	AT2G41000	1.03011	0.000822013	Up
AT1G20980	SPL14	AT1G20980	1.02962	1.28e-05	Up
AT2G25850	PAPS2	AT2G25850	1.02909	0.011044	Up
AT3G09370	MYB3R-3	AT3G09370	1.02853	0.00862237	Up
AT1G16960	AT1G16960	AT1G16960	1.02815	0.0193476	Up
AT4G23900	AT4G23900	AT4G23900	1.02813	0.0219918	Up
AT1G09250	AT1G09250	AT1G09250	1.02783	0.00455058	Up
[truncated: 2,182 more rows]

## Sheet: atg5-1TCV_vs_Col0TCV
User_ID	symbol	ensembl_ID	atg5TCV-Col0TCV_log2FC	atg5TCV-Col0TCV_adjPval	Direction
AT5G24080	AT5G24080	AT5G24080	9.8824	9.67e-07	Up
AT3G17520	AT3G17520	AT3G17520	9.56337	9.14e-06	Up
AT3G50400	AT3G50400	AT3G50400	8.39706	0.00105325	Up
AT3G50980	XERO1	AT3G50980	7.64038	0.00394311	Up
AT2G35300	LEA18	AT2G35300	7.55493	3.51e-05	Up
AT3G53040	AT3G53040	AT3G53040	7.52281	0.0261224	Up
AT5G59320	LTP3	AT5G59320	7.25389	9.06e-11	Up
AT2G43730	AT2G43730	AT2G43730	7.24329	0.0281189	Up
AT5G59310	LTP4	AT5G59310	7.20463	9.68e-07	Up
AT4G28088	AT4G28088	AT4G28088	6.9841	0.0271206	Up
AT5G55410	AT5G55410	AT5G55410	6.96977	2.51e-05	Up
AT2G29380	HAI3	AT2G29380	6.9422	0.000962412	Up
AT5G41040	RWP1	AT5G41040	6.57181	0.000123499	Up
AT1G52690	LEA7	AT1G52690	6.42419	0.000589128	Up
AT4G06320	AT4G06320	AT4G06320	6.34753	9.97e-05	Up
AT2G04190	AT2G04190	AT2G04190	6.23888	0.0304901	Up
AT3G22565	AT3G22565	AT3G22565	6.21179	0.00332376	Up
AT1G62240	AT1G62240	AT1G62240	6.15868	0.0344976	Up
AT1G04527	AT1G04527	AT1G04527	5.95525	0.000542199	Up
AT4G26050	PIRL8	AT4G26050	5.82601	0.00958106	Up
AT3G57690	AGP23	AT3G57690	5.74622	0.0144545	Up
AT5G54050	AT5G54050	AT5G54050	5.73538	0.0109868	Up
AT1G29230	CIPK18	AT1G29230	5.67322	0.000109677	Up
AT5G06760	LEA4-5	AT5G06760	5.66108	4.61e-07	Up
AT3G62990	AT3G62990	AT3G62990	5.61667	0.011285	Up
AT5G47530	AT5G47530	AT5G47530	5.60838	0.00518286	Up
AT4G17280	AT4G17280	AT4G17280	5.60837	0.0140029	Up
AT4G32810	CCD8	AT4G32810	5.50712	0.0017643	Up
AT5G13170	SAG29	AT5G13170	5.47846	7.09e-07	Up
AT2G07659	AT2G07659	AT2G07659	5.47022	0.000403314	Up
AT2G08585	AT2G08585	AT2G08585	5.45311	0.00157189	Up
AT5G61890	AT5G61890	AT5G61890	5.42468	0.000293969	Up
AT4G08570	AT4G08570	AT4G08570	5.42431	0.00409967	Up
AT3G05055	AT3G05055	AT3G05055	5.29849	6.93e-07	Up
AT2G19900	NADP-ME1	AT2G19900	5.27006	0.0106328	Up
AT5G04315	U1.9	AT5G04315	5.24833	0.00225955	Up
AT5G04325	AT5G04325	AT5G04325	5.24833	0.00225955	Up
AT5G56795	MT1B	AT5G56795	5.20293	5.06e-10	Up
AT2G34610	AT2G34610	AT2G34610	5.17297	7.04e-06	Up
AT1G22990	HIPP22	AT1G22990	5.1364	0.00325213	Up
AT5G50260	CEP1	AT5G50260	5.13413	9.99e-05	Up
AT1G62760	AT1G62760	AT1G62760	5.12151	5.44e-05	Up
AT1G23120	AT1G23120	AT1G23120	5.10144	5.05e-09	Up
AT4G33467	AT4G33467	AT4G33467	5.09527	0.00243562	Up
AT3G48020	AT3G48020	AT3G48020	5.0904	5.16e-08	Up
AT3G22620	AT3G22620	AT3G22620	5.08691	0.00036592	Up
AT4G03295	AT4G03295	AT4G03295	5.07416	0.00313251	Up
AT4G09600	GASA3	AT4G09600	5.07412	0.0120928	Up
AT2G37750	AT2G37750	AT2G37750	5.06967	1.19e-07	Up
AT5G52300	LTI65	AT5G52300	4.9412	0.000253659	Up
AT5G44610	MAP18	AT5G44610	4.93192	0.011178	Up
AT1G53470	MSL4	AT1G53470	4.92057	0.00196345	Up
AT5G54165	AT5G54165	AT5G54165	4.90178	8.38e-07	Up
AT5G26010	AT5G26010	AT5G26010	4.8699	0.00457272	Up
AT2G25625	AT2G25625	AT2G25625	4.85825	0.000711717	Up
AT1G05340	AT1G05340	AT1G05340	4.85355	7.8e-06	Up
AT2G47770	TSPO	AT2G47770	4.85166	0.000209819	Up
AT5G04455	U1.8	AT5G04455	4.8488	0.0105294	Up
AT5G62800	AT5G62800	AT5G62800	4.84641	0.0311529	Up
AT1G07610	MT1C	AT1G07610	4.82988	1.81e-07	Up
AT4G26200	ACS7	AT4G26200	4.79497	0.0262667	Up
AT3G13672	AT3G13672	AT3G13672	4.7912	4.82e-05	Up
AT3G52820	PAP22	AT3G52820	4.77869	5.59e-05	Up
AT1G62370	AT1G62370	AT1G62370	4.76925	2.43e-08	Up
AT4G05285	AT4G05285	AT4G05285	4.76814	0.00580358	Up
AT5G01300	AT5G01300	AT5G01300	4.66835	2.23e-05	Up
AT5G50360	AT5G50360	AT5G50360	4.65608	0.00853216	Up
AT4G07120	U1.2	AT4G07120	4.63849	0.00452782	Up
AT3G02895	AT3G02895	AT3G02895	4.63577	0.00683481	Up
AT5G02665	AT5G02665	AT5G02665	4.60894	0.017735	Up
AT4G16146	AT4G16146	AT4G16146	4.60719	2.99e-07	Up
AT4G08775	AT4G08775	AT4G08775	4.60264	0.00368937	Up
AT3G02795	AT3G02795	AT3G02795	4.58682	0.012314	Up
AT1G17030	AT1G17030	AT1G17030	4.56544	0.00420976	Up
AT4G25380	SAP10	AT4G25380	4.55267	0.0345595	Up
AT3G21520	DMP1	AT3G21520	4.50343	0.0169764	Up
AT4G26365	AT4G26365	AT4G26365	4.47907	0.0126802	Up
AT3G22560	AT3G22560	AT3G22560	4.46547	0.000194155	Up
AT5G62160	ZIP12	AT5G62160	4.46437	0.00458344	Up
AT4G00870	AT4G00870	AT4G00870	4.45369	0.0224622	Up
AT5G23950	AT5G23950	AT5G23950	4.42834	5.58e-18	Up
AT3G02480	AT3G02480	AT3G02480	4.41144	0.000163073	Up
AT1G53625	AT1G53625	AT1G53625	4.40395	0.00110496	Up
AT5G39520	AT5G39520	AT5G39520	4.39886	0.000188448	Up
AT1G24600	AT1G24600	AT1G24600	4.37204	2.18e-10	Up
AT3G10455	AT3G10455	AT3G10455	4.36471	0.0109522	Up
AT2G26692	AT2G26692	AT2G26692	4.35743	0.0193049	Up
AT4G38000	DOF4.7	AT4G38000	4.35057	1.01e-06	Up
AT1G57590	AT1G57590	AT1G57590	4.3473	0.000294633	Up
AT3G48510	AT3G48510	AT3G48510	4.33769	0.0252529	Up
AT3G03530	NPC4	AT3G03530	4.33767	0.000866325	Up
AT1G05100	MAPKKK18	AT1G05100	4.33408	3.51e-06	Up
AT2G07775	AT2G07775	AT2G07775	4.30926	0.03136	Up
AT3G61930	AT3G61930	AT3G61930	4.30904	0.0180756	Up
AT4G11910	AT4G11910	AT4G11910	4.28249	8.87e-06	Up
AT1G19373	AT1G19373	AT1G19373	4.27475	0.0155919	Up
AT5G25110	CIPK25	AT5G25110	4.27214	0.0167842	Up
AT4G37730	bZIP7	AT4G37730	4.26206	0.0132619	Up
AT3G11150	AT3G11150	AT3G11150	4.25514	0.0374058	Up
AT1G06667	AT1G06667	AT1G06667	4.25351	0.0391625	Up
AT5G04390	AT5G04390	AT5G04390	4.24512	0.00668401	Up
AT4G08125	AT4G08125	AT4G08125	4.2207	0.00693503	Up
AT2G15220	AT2G15220	AT2G15220	4.21016	0.00285455	Up
AT5G40730	AGP24	AT5G40730	4.20416	3.57e-11	Up
AT3G14060	AT3G14060	AT3G14060	4.20286	5.79e-06	Up
AT4G05100	MYB74	AT4G05100	4.18387	8.6e-05	Up
AT5G01225	AT5G01225	AT5G01225	4.18153	0.0185199	Up
AT1G80160	GLYI7	AT1G80160	4.17148	0.00111475	Up
AT3G48580	XTH11	AT3G48580	4.16972	0.0305684	Up
AT5G06775	AT5G06775	AT5G06775	4.16692	0.0127719	Up
AT5G53710	AT5G53710	AT5G53710	4.15608	2.95e-05	Up
AT2G35070	AT2G35070	AT2G35070	4.14382	0.00170259	Up
AT1G48000	MYB112	AT1G48000	4.1341	0.00063096	Up
AT3G57010	AT3G57010	AT3G57010	4.12973	0.000325195	Up
AT5G56985	AT5G56985	AT5G56985	4.11556	0.0430438	Up
AT1G79900	BAC2	AT1G79900	4.11522	3.8e-06	Up
AT3G61900	AT3G61900	AT3G61900	4.11363	8.3e-06	Up
AT5G09930	ABCF2	AT5G09930	4.10692	9.85e-05	Up
AT5G03210	DIP2	AT5G03210	4.1043	0.000937529	Up
AT4G33150	AT4G33150	AT4G33150	4.09718	5.37e-05	Up
AT1G29640	AT1G29640	AT1G29640	4.08516	4.98e-08	Up
AT1G47510	5PTASE11	AT1G47510	4.08394	2.08e-05	Up
AT4G35060	HIPP25	AT4G35060	4.07922	1.42e-12	Up
AT3G50970	LTI30	AT3G50970	4.0498	0.000128122	Up
AT3G48240	AT3G48240	AT3G48240	4.04804	7.61e-07	Up
AT5G38780	AT5G38780	AT5G38780	4.03269	0.0363821	Up
AT2G44578	AT2G44578	AT2G44578	4.02187	0.00103585	Up
AT4G21680	NRT1.8	AT4G21680	4.01666	0.0332085	Up
AT2G32510	MAPKKK17	AT2G32510	3.99831	0.000907273	Up
AT3G49210	AT3G49210	AT3G49210	3.97377	6.89e-06	Up
AT4G28085	AT4G28085	AT4G28085	3.95651	0.000758395	Up
AT4G37990	ELI3-2	AT4G37990	3.95453	0.0128994	Up
AT1G06520	GPAT1	AT1G06520	3.93424	0.000118587	Up
AT3G25950	AT3G25950	AT3G25950	3.93224	0.016869	Up
AT3G19615	AT3G19615	AT3G19615	3.92499	0.0133277	Up
AT5G15960	KIN1	AT5G15960	3.91032	0.000697164	Up
AT2G35382	AT2G35382	AT2G35382	3.89975	0.00158478	Up
AT5G15500	AT5G15500	AT5G15500	3.89663	0.000644289	Up
AT3G14280	AT3G14280	AT3G14280	3.89067	0.00027502	Up
AT5G06305	AT5G06305	AT5G06305	3.88907	0.0288489	Up
AT5G56980	AT5G56980	AT5G56980	3.8875	6.16e-08	Up
AT5G00760	AT5G00760	AT5G00760	3.87342	0.0277143	Up
AT2G31945	AT2G31945	AT2G31945	3.87235	0.000727249	Up
ATMG00250	ATMG00250	ATMG00250	3.86724	0.044155	Up
AT2G07758	AT2G07758	AT2G07758	3.86724	0.044155	Up
AT4G37070	PLP1	AT4G37070	3.8507	0.0117166	Up
AT1G07430	HAI2	AT1G07430	3.81906	8.37e-05	Up
AT4G31875	AT4G31875	AT4G31875	3.81681	1.61e-06	Up
AT1G16515	AT1G16515	AT1G16515	3.80524	7.94e-08	Up
AT5G22500	FAR1 AT5G22500	AT5G22500	3.8037	0.00738061	Up
AT2G21187	AT2G21187	AT2G21187	3.78071	2.03e-07	Up
AT2G47200	AT2G47200	AT2G47200	3.77777	0.00418898	Up
AT1G73260	KTI1	AT1G73260	3.76843	0.0157143	Up
AT2G41230	ORS1	AT2G41230	3.76756	0.0188173	Up
AT2G44010	AT2G44010	AT2G44010	3.76357	0.023061	Up
AT1G03220	AT1G03220	AT1G03220	3.74647	7.68e-07	Up
AT1G02470	AT1G02470	AT1G02470	3.73286	1.11e-08	Up
AT1G61820	BGLU46	AT1G61820	3.72962	0.00642225	Up
AT5G15190	AT5G15190	AT5G15190	3.72433	4.98e-06	Up
AT3G55860	AT3G55860	AT3G55860	3.72286	0.0326588	Up
AT3G06900	U4.2	AT3G06900	3.71964	0.000279085	Up
AT2G41190	AT2G41190	AT2G41190	3.71691	2.06e-05	Up
AT1G07590	AT1G07590	AT1G07590	3.70658	9.39e-07	Up
AT5G02420	AT5G02420	AT5G02420	3.70586	4.01e-07	Up
AT2G21820	AT2G21820	AT2G21820	3.69545	0.000123835	Up
AT4G05030	AT4G05030	AT4G05030	3.682	0.00474092	Up
AT5G63130	AT5G63130	AT5G63130	3.68135	6.52e-05	Up
AT3G48450	AT3G48450	AT3G48450	3.6791	0.0103308	Up
AT3G21305	AT3G21305	AT3G21305	3.66297	0.0129969	Up
AT5G45070	PP2-A8	AT5G45070	3.65777	0.0180135	Up
AT5G65300	AT5G65300	AT5G65300	3.65625	0.00154108	Up
AT2G20470	AT2G20470	AT2G20470	3.65334	0.000393245	Up
AT2G33380	RD20	AT2G33380	3.65261	1.59e-10	Up
AT1G58340	ZF14	AT1G58340	3.63887	0.0134865	Up
AT5G59220	HAI1	AT5G59220	3.6359	0.000832286	Up
AT4G07625	AT4G07625	AT4G07625	3.63522	0.0444541	Up
AT2G32190	AT2G32190	AT2G32190	3.63476	0.000329058	Up
AT3G03480	CHAT	AT3G03480	3.62916	2.99e-06	Up
AT2G27389	AT2G27389	AT2G27389	3.61389	0.0175525	Up
AT2G25940	ALPHA-VPE	AT2G25940	3.61195	0.00616833	Up
AT5G42930	AT5G42930	AT5G42930	3.61111	0.0266064	Up
AT4G24000	CSLG2	AT4G24000	3.60566	0.00340952	Up
AT1G32450	NRT1.5	AT1G32450	3.59788	3.51e-06	Up
AT4G16105	AT4G16105	AT4G16105	3.59025	0.0334274	Up
AT5G67245	AT5G67245	AT5G67245	3.58987	1.67e-14	Up
AT1G07500	AT1G07500	AT1G07500	3.58861	0.000297361	Up
AT3G44300	NIT2	AT3G44300	3.56671	0.00261949	Up
AT5G02570	AT5G02570	AT5G02570	3.55919	0.0154393	Up
AT2G47270	UPB1	AT2G47270	3.54922	0.00401489	Up
AT3G04255	AT3G04255	AT3G04255	3.54519	0.000238366	Up
AT1G56650	PAP1 AT1G56650	AT1G56650	3.54516	1.18e-05	Up
AT3G48180	AT3G48180	AT3G48180	3.53307	1.07e-05	Up
AT4G25433	AT4G25433	AT4G25433	3.5327	0.00174559	Up
AT3G55890	AT3G55890	AT3G55890	3.525	0.000761025	Up
AT1G54570	PES1	AT1G54570	3.52083	1.37e-08	Up
AT2G31980	CYS2	AT2G31980	3.51816	0.000118839	Up
AT2G05518	AT2G05518	AT2G05518	3.50307	5.44e-05	Up
AT3G23240	ERF1	AT3G23240	3.50215	0.00696187	Up
AT2G15830	AT2G15830	AT2G15830	3.4736	5.66e-08	Up
AT1G27110	AT1G27110	AT1G27110	3.4634	0.000391518	Up
AT5G50560	AT5G50660 AT5G50560	AT5G50560	3.45616	0.00420976	Up
AT5G50660	AT5G50660 AT5G50660	AT5G50660	3.45616	0.00420976	Up
AT1G19200	AT1G19200	AT1G19200	3.45142	1.02e-05	Up
AT4G18422	AT4G18422	AT4G18422	3.43147	0.0140408	Up
AT3G00985	AT3G00985	AT3G00985	3.42962	0.0495991	Up
AT3G03341	AT3G03341	AT3G03341	3.42693	7.88e-05	Up
AT2G37870	AT2G37870	AT2G37870	3.41937	0.000195269	Up
ATMG00960	ATMG00960	ATMG00960	3.41703	0.0419053	Up
AT5G10090	TPR13	AT5G10090	3.41618	0.0223725	Up
AT1G52565	AT1G52565	AT1G52565	3.41436	0.000148668	Up
AT5G62150	AT5G62150	AT5G62150	3.4042	0.000937529	Up
AT3G04155	AT3G04155	AT3G04155	3.40328	0.0326554	Up
AT5G07680	NAC080	AT5G07680	3.40202	0.000566212	Up
AT3G02435	AT3G02435	AT3G02435	3.39921	0.00383113	Up
AT5G01505	AT5G01505	AT5G01505	3.39395	0.0305409	Up
AT3G60330	HA7	AT3G60330	3.3896	0.0066199	Up
AT4G15248	BBX30	AT4G15248	3.38543	1.47e-08	Up
AT5G14180	MPL1	AT5G14180	3.38422	0.0201354	Up
AT1G32350	AOX1D	AT1G32350	3.37293	0.0431939	Up
AT2G45570	CYP76C2	AT2G45570	3.37217	0.0498977	Up
AT4G33550	AT4G33550	AT4G33550	3.36558	0.00114767	Up
AT4G04972	AT4G04972	AT4G04972	3.36065	0.0096847	Up
AT2G38465	AT2G38465	AT2G38465	3.35606	0.000953481	Up
AT1G21528	AT1G21528	AT1G21528	3.35052	0.00423224	Up
AT3G56891	AT3G56891	AT3G56891	3.31803	0.0202055	Up
AT5G20810	AT5G20810	AT5G20810	3.312	0.00235101	Up
AT1G65483	AT1G65483	AT1G65483	3.29956	0.0298552	Up
AT3G06420	ATG8H	AT3G06420	3.29447	2.12e-07	Up
AT2G23110	AT2G23110	AT2G23110	3.29278	0.024771	Up
AT1G73010	PS2 AT1G73010	AT1G73010	3.29197	0.00166879	Up
AT4G18425	AT4G18425	AT4G18425	3.29102	1.23e-05	Up
AT2G30300	AT2G30300	AT2G30300	3.28153	0.00933709	Up
AT5G40690	AT5G40690	AT5G40690	3.28086	0.000836364	Up
AT2G13760	AT2G13760	AT2G13760	3.26869	0.0170452	Up
AT2G45360	AT2G45360	AT2G45360	3.26439	0.0131968	Up
AT3G15500	NAC3 AT3G15500	AT3G15500	3.25894	0.0336722	Up
AT2G43580	AT2G43580	AT2G43580	3.2585	0.00887446	Up
AT3G09595	AT3G09595	AT3G09595	3.2555	7.66e-05	Up
AT1G15100	RHA2A	AT1G15100	3.25423	4.01e-13	Up
AT4G22920	NYE1	AT4G22920	3.25306	6.51e-09	Up
AT5G38710	AT5G38710	AT5G38710	3.2495	0.00551426	Up
AT2G01610	AT2G01610	AT2G01610	3.24922	3.89e-05	Up
AT2G45210	SAUR36	AT2G45210	3.24851	0.000478642	Up
AT3G13227	AT3G13227	AT3G13227	3.24828	0.0418044	Up
AT3G46700	AT3G46700	AT3G46700	3.2447	0.0429769	Up
AT2G27180	AT2G27180	AT2G27180	3.24038	2.44e-05	Up
AT2G44260	AT2G44260	AT2G44260	3.23143	0.00067084	Up
AT4G37010	CEN2 AT4G37010	AT4G37010	3.23022	0.0057617	Up
AT4G02280	SUS3	AT4G02280	3.22692	3.21e-08	Up
AT1G10540	NAT8	AT1G10540	3.21912	0.0310693	Up
AT3G02725	AT3G02725	AT3G02725	3.21392	0.0481046	Up
AT2G41380	AT2G41380	AT2G41380	3.21286	2.38e-05	Up
AT1G63245	CLE14	AT1G63245	3.21079	0.000102442	Up
AT5G42235	AT5G42235	AT5G42235	3.206	0.0461275	Up
AT1G04897	U4.6	AT1G04897	3.20253	0.0328581	Up
AT5G54300	AT5G54300	AT5G54300	3.19868	6.12e-08	Up
AT5G04340	ZAT6	AT5G04340	3.18876	0.000565112	Up
AT1G48260	CIPK17	AT1G48260	3.1873	0.00606142	Up
AT2G01890	PAP8	AT2G01890	3.18074	2.31e-06	Up
AT2G06065	AT2G06065	AT2G06065	3.17924	0.0465871	Up
AT2G23321	AT2G23321	AT2G23321	3.17619	0.0121747	Up
AT3G25290	AT3G25290	AT3G25290	3.16628	6.17e-07	Up
AT3G18250	AT3G18250	AT3G18250	3.16347	0.00604514	Up
AT4G21920	AT4G21920	AT4G21920	3.16164	0.013993	Up
AT1G12013	SNOR111	AT1G12013	3.16099	0.00229206	Up
AT3G19380	PUB25	AT3G19380	3.15494	2.81e-11	Up
AT5G00765	AT5G00765	AT5G00765	3.15441	0.000802643	Up
AT3G53650	AT3G53650	AT3G53650	3.15357	1.35e-05	Up
AT3G01970	WRKY45	AT3G01970	3.15065	0.0035678	Up
AT5G15180	AT5G15180	AT5G15180	3.14795	0.00823904	Up
AT5G47590	AT5G47590	AT5G47590	3.14343	3.6e-05	Up
AT4G12580	AT4G12580	AT4G12580	3.13751	0.00679972	Up
AT3G57680	AT3G57680	AT3G57680	3.13462	7.3e-06	Up
AT2G30360	SIP4	AT2G30360	3.12752	2.78e-06	Up
AT4G20320	AT4G20320	AT4G20320	3.11948	0.000158518	Up
AT3G04010	AT3G04010	AT3G04010	3.11148	0.000646855	Up
AT1G70640	AT1G70640	AT1G70640	3.09604	0.00379294	Up
AT4G29230	NAC075	AT4G29230	3.09265	6.83e-05	Up
AT5G37500	GORK	AT5G37500	3.09128	0.00121679	Up
AT5G46295	AT5G46295	AT5G46295	3.09047	0.0110219	Up
AT5G60470	AT5G60470	AT5G60470	3.08171	0.002659	Up
AT4G33040	AT4G33040	AT4G33040	3.07628	0.000149595	Up
AT3G03470	CYP89A9	AT3G03470	3.07286	1.63e-05	Up
AT4G24130	AT4G24130	AT4G24130	3.07256	4.68e-05	Up
AT1G55775	AT1G55775	AT1G55775	3.07033	0.0378788	Up
AT4G00305	AT4G00305	AT4G00305	3.06598	0.000106123	Up
AT5G66400	RAB18 AT5G66400	AT5G66400	3.06528	0.00146249	Up
AT4G16680	AT4G16680	AT4G16680	3.06505	0.0072036	Up
AT2G02990	RNS1	AT2G02990	3.06072	0.0258699	Up
AT5G06230	TBL9	AT5G06230	3.05787	0.0140029	Up
AT1G49450	AT1G49450	AT1G49450	3.05513	0.00353548	Up
AT4G12410	AT4G12410	AT4G12410	3.05322	0.0114312	Up
AT3G04065	AT3G04065	AT3G04065	3.05319	0.000246586	Up
AT4G01060	CPL3 AT4G01060	AT4G01060	3.05126	1.83e-05	Up
AT2G06255	ELF4-L3	AT2G06255	3.04979	2.29e-05	Up
AT1G68795	CLE12	AT1G68795	3.04678	4.92e-06	Up
AT5G53820	AT5G53820	AT5G53820	3.04146	0.0241034	Up
AT5G67310	CYP81G1	AT5G67310	3.03729	0.0189051	Up
AT1G07600	MT1A	AT1G07600	3.01863	0.000128429	Up
AT3G12830	AT3G12830	AT3G12830	3.01827	5.04e-06	Up
AT1G52890	NAC019	AT1G52890	3.01751	0.003783	Up
AT2G21780	AT2G21780	AT2G21780	3.01524	0.031503	Up
AT1G77145	AT1G77145	AT1G77145	3.01434	2.87e-06	Up
AT5G40382	AT5G40382	AT5G40382	3.01373	0.0128994	Up
AT3G10320	AT3G10320	AT3G10320	3.01229	0.020386	Up
AT1G30800	AT1G30800	AT1G30800	3.01111	0.0428795	Up
AT4G01930	AT4G01930	AT4G01930	3.00858	0.02297	Up
AT5G01165	AT5G01165	AT5G01165	3.00198	0.00834579	Up
AT5G20940	AT5G20940	AT5G20940	3.00186	0.00263836	Up
AT4G34380	AT4G34380	AT4G34380	3.00101	0.0304901	Up
AT1G52857	AT1G52857	AT1G52857	2.99639	0.0372253	Up
AT4G32780	AT4G32780	AT4G32780	2.99149	0.0199775	Up
AT3G55910	AT3G55910	AT3G55910	2.99003	0.000471753	Up
AT4G04465	AT4G04465	AT4G04465	2.98815	0.0293333	Up
AT5G07095	AT5G07095	AT5G07095	2.98481	0.00134812	Up
AT5G01520	AIRP2	AT5G01520	2.98435	4.47e-05	Up
AT1G70910	DEP	AT1G70910	2.98413	0.00962625	Up
AT1G66390	MYB90	AT1G66390	2.97976	0.032477	Up
AT3G63280	NEK4	AT3G63280	2.97666	0.00137367	Up
AT5G01815	AT5G01815	AT5G01815	2.97522	0.00139166	Up
AT1G02820	LEA3	AT1G02820	2.97403	0.000668794	Up
AT3G28007	SWEET4	AT3G28007	2.97389	0.000983674	Up
AT2G21180	AT2G21180	AT2G21180	2.96627	1.98e-07	Up
AT1G17020	SRG1	AT1G17020	2.96349	0.00614424	Up
AT4G37430	CYP91A2	AT4G37430	2.9612	1.48e-05	Up
AT2G29950	ELF4-L1	AT2G29950	2.95553	0.00133643	Up
AT4G25635	AT4G25635	AT4G25635	2.95353	0.0378374	Up
AT2G40435	AT2G40435	AT2G40435	2.9512	4.98e-06	Up
AT1G29860	WRKY71	AT1G29860	2.94777	0.0376503	Up
AT3G14770	SWEET2	AT3G14770	2.94636	2.59e-08	Up
AT5G46115	AT5G46115	AT5G46115	2.94487	3.37e-05	Up
AT1G61810	BGLU45	AT1G61810	2.94439	0.0367715	Up
AT1G60190	PUB19	AT1G60190	2.93903	0.00315318	Up
AT1G45145	TRX5	AT1G45145	2.93756	0.000165306	Up
AT5G39610	NAC6	AT5G39610	2.93586	0.0152775	Up
AT5G35926	AT5G35926	AT5G35926	2.93347	0.00067084	Up
AT2G43510	TI1	AT2G43510	2.93253	0.00141228	Up
AT5G24090	CHIA	AT5G24090	2.9308	0.0102853	Up
AT4G16600	PGSIP8	AT4G16600	2.92852	0.0116951	Up
AT1G53890	AT1G53870 AT1G53890	AT1G53890	2.92806	0.00253478	Up
AT1G24580	AT1G24580	AT1G24580	2.92412	0.00433364	Up
AT5G17460	AT5G17460	AT5G17460	2.91984	0.000980525	Up
AT1G53870	AT1G53870 AT1G53870	AT1G53870	2.91942	0.00260961	Up
AT4G18990	XTH29	AT4G18990	2.91805	0.0069139	Up
AT4G18980	AtS40-3	AT4G18980	2.91802	0.0108208	Up
AT2G45760	BAP2	AT2G45760	2.91706	0.0367129	Up
ATMG00513	ATMG00513	ATMG00513	2.91439	4.71e-05	Up
AT5G15533	AT5G15533	AT5G15533	2.90228	0.0107481	Up
AT1G20070	AT1G20070	AT1G20070	2.90036	6.53e-05	Up
AT5G07325	AT5G07325	AT5G07325	2.89796	0.0394277	Up
AT1G71700	AT1G71700	AT1G71700	2.89465	0.000131691	Up
AT5G16360	AT5G16360	AT5G16360	2.89185	2.67e-05	Up
AT4G11911	AT4G11911	AT4G11911	2.89132	0.00479928	Up
AT1G67860	AT1G67860	AT1G67860	2.88989	2.19e-05	Up
AT2G32210	AT2G32210	AT2G32210	2.8855	0.00155744	Up
AT1G30220	INT2	AT1G30220	2.88142	0.00685296	Up
AT3G05937	AT3G05937	AT3G05937	2.87342	8.63e-06	Up
AT2G38400	AGT3	AT2G38400	2.86991	3.99e-05	Up
AT5G19970	AT5G19970	AT5G19970	2.85871	0.000132487	Up
AT2G07675	AT2G07675 AT2G07675	AT2G07675	2.85652	0.000848715	Up
ATMG00980	AT2G07675 ATMG00980	ATMG00980	2.85651	0.000848715	Up
AT1G53490	HEI10	AT1G53490	2.85335	3.77e-05	Up
AT1G79450	ALIS5	AT1G79450	2.84847	0.0344726	Up
AT2G47190	MYB2	AT2G47190	2.84738	0.0137711	Up
AT5G57910	AT5G57910	AT5G57910	2.84589	2.1e-08	Up
AT4G38060	AT4G38060	AT4G38060	2.84085	1.87e-06	Up
AT1G62570	FMO GS-OX4	AT1G62570	2.83901	6.84e-07	Up
AT5G45310	AT5G45310	AT5G45310	2.83752	4.22e-05	Up
AT2G41342	AT2G41342	AT2G41342	2.83354	0.00156227	Up
AT3G13435	AT3G13435	AT3G13435	2.82567	0.0260686	Up
AT3G28210	PMZ	AT3G28210	2.825	0.00465795	Up
AT4G26470	AT4G26470	AT4G26470	2.82184	0.00142982	Up
AT2G36590	ProT3	AT2G36590	2.81753	0.000289686	Up
AT1G77765	AT1G77765	AT1G77765	2.81692	0.00145811	Up
AT5G05300	AT5G05300	AT5G05300	2.81191	0.0337786	Up
AT2G23620	MES1	AT2G23620	2.80307	0.000170586	Up
AT1G75450	CKX5	AT1G75450	2.7987	2.64e-05	Up
AT1G62420	AT1G62420	AT1G62420	2.7959	0.0408138	Up
AT4G02380	SAG21	AT4G02380	2.7952	0.00808489	Up
AT1G22985	CRF7	AT1G22985	2.79047	0.000301269	Up
AT1G23040	AT1G23040	AT1G23040	2.78811	8.35e-06	Up
AT1G09773	AT1G09773	AT1G09773	2.78795	0.00772375	Up
AT1G20440	COR47	AT1G20440	2.78698	6.14e-06	Up
ATMG01380	ATMG01380	ATMG01380	2.78637	6.39e-06	Up
AT3G03430	AT3G03430	AT3G03430	2.77834	0.0100942	Up
AT5G20830	SUS1	AT5G20830	2.77718	3.52e-07	Up
AT4G12080	AHL1	AT4G12080	2.77307	1.02e-05	Up
AT2G30840	AT2G30840	AT2G30840	2.77242	0.0222956	Up
AT1G69490	NAP	AT1G69490	2.77228	0.0136503	Up
AT1G57990	PUP18	AT1G57990	2.77204	0.0217926	Up
AT5G15853	AT5G15853	AT5G15853	2.77203	0.00169863	Up
AT2G34810	AT2G34810	AT2G34810	2.77168	5e-07	Up
AT5G59845	AT5G59845	AT5G59845	2.76867	0.000908321	Up
AT5G10930	CIPK5	AT5G10930	2.76812	2.42e-05	Up
AT3G02910	AT3G02910	AT3G02910	2.75851	1.36e-07	Up
AT1G46768	RAP2.1	AT1G46768	2.75663	4.09e-06	Up
AT1G69890	AT1G69890	AT1G69890	2.7545	0.018668	Up
AT2G40790	CXXS2	AT2G40790	2.7531	0.0137435	Up
AT4G39955	AT4G39955	AT4G39955	2.74979	4.66e-06	Up
AT2G26290	ARSK1	AT2G26290	2.74477	0.00519648	Up
AT5G14000	NAC084	AT5G14000	2.74056	0.014243	Up
AT5G10300	MES5	AT5G10300	2.7402	5.5e-05	Up
AT2G01021	AT2G01021	AT2G01021	2.73899	0.000459149	Up
AT1G54100	ALDH7B4	AT1G54100	2.73859	9.46e-08	Up
AT3G18260	AT3G18260	AT3G18260	2.73418	0.000937529	Up
AT4G19230	CYP707A1	AT4G19230	2.73324	0.00069728	Up
AT2G28400	AT2G28400	AT2G28400	2.7324	0.000889205	Up
AT3G62590	AT3G62590	AT3G62590	2.72437	0.000235314	Up
AT3G02140	TMAC2	AT3G02140	2.71932	0.00276812	Up
AT2G07719	AT2G07719	AT2G07719	2.71922	4.86e-06	Up
AT2G33385	arpc2b	AT2G33385	2.71814	0.00242536	Up
AT1G54575	AT1G54575	AT1G54575	2.71596	0.0177059	Up
AT5G23160	AT5G23160	AT5G23160	2.715	0.00558779	Up
AT3G11690	AT3G11690	AT3G11690	2.71497	0.000101196	Up
AT5G64570	XYL4	AT5G64570	2.71349	0.000664775	Up
AT2G29430	AT2G29430	AT2G29430	2.71244	0.0135937	Up
AT3G04775	AT3G04775	AT3G04775	2.71046	0.0182173	Up
AT1G54095	AT1G54095	AT1G54095	2.70919	0.0450314	Up
AT4G34860	A/N-InvB	AT4G34860	2.70601	8.09e-07	Up
AT4G39110	AT4G39110	AT4G39110	2.69852	0.0449713	Up
AT2G08725	AT2G08725	AT2G08725	2.68772	0.0150417	Up
AT3G04040	AT3G04040	AT3G04040	2.68204	3.34e-09	Up
AT3G13910	AT3G13910	AT3G13910	2.68078	2.58e-10	Up
AT5G18661	AT5G18661	AT5G18661	2.68014	0.0161122	Up
AT3G14050	RSH2 AT3G14050	AT3G14050	2.6781	0.00306452	Up
AT3G60961	AT3G60961	AT3G60961	2.67648	0.000228502	Up
AT3G25870	AT3G25870	AT3G25870	2.67121	3.41e-07	Up
AT2G25460	AT2G25460	AT2G25460	2.66553	0.0294329	Up
AT1G13360	AT1G13360	AT1G13360	2.65767	4.31e-07	Up
AT3G30180	BR6OX2	AT3G30180	2.65373	4.55e-06	Up
AT4G37608	AT4G37608	AT4G37608	2.65336	7.69e-08	Up
AT2G14620	XTH10	AT2G14620	2.6513	0.0316983	Up
AT2G36950	AT2G36950	AT2G36950	2.6497	2.49e-06	Up
AT5G66658	AT5G66658	AT5G66658	2.64948	1.42e-07	Up
AT4G39670	AT4G39670	AT4G39670	2.64463	0.0335398	Up
AT3G57980	AT3G57980	AT3G57980	2.64428	0.0254278	Up
AT4G19810	ChiC	AT4G19810	2.64426	0.0483659	Up
AT1G62510	AT1G62510	AT1G62510	2.63927	0.0084255	Up
AT4G40070	AT4G40070	AT4G40070	2.62922	0.00360605	Up
AT4G24026	AT4G24026	AT4G24026	2.61995	7.56e-05	Up
AT3G29034	AT3G29034	AT3G29034	2.60768	0.0174042	Up
AT4G29570	AT4G29570	AT4G29570	2.60559	0.0222765	Up
AT2G46680	HB-7 AT2G46680	AT2G46680	2.60362	0.000784205	Up
AT3G14440	NCED3	AT3G14440	2.60329	0.0108727	Up
AT2G23320	WRKY15	AT2G23320	2.60153	0.000598841	Up
AT2G19570	CDA1	AT2G19570	2.59392	3.37e-06	Up
AT5G02645	AT5G02645	AT5G02645	2.59204	0.0185596	Up
AT3G47950	HA4	AT3G47950	2.58934	0.000478415	Up
AT3G45730	AT3G45730	AT3G45730	2.585	0.00846994	Up
AT5G08525	AT5G08525	AT5G08525	2.58219	0.0188514	Up
AT3G57380	AT3G57380	AT3G57380	2.58174	0.0138558	Up
AT2G16720	MYB7	AT2G16720	2.57576	1.05e-05	Up
AT1G62480	AT1G62480	AT1G62480	2.57209	0.000112487	Up
AT1G11700	AT1G11700	AT1G11700	2.56144	5.82e-05	Up
AT3G04060	NAC046	AT3G04060	2.56067	0.0196053	Up
AT1G02660	AT1G02660	AT1G02660	2.55762	0.0002023	Up
AT3G03170	AT3G03170	AT3G03170	2.55666	0.00686917	Up
AT1G09867	AT1G09867	AT1G09867	2.55143	0.0017526	Up
AT5G02090	AT5G02090	AT5G02090	2.54859	0.000354742	Up
AT3G14360	AT3G14360	AT3G14360	2.54808	0.0126915	Up
AT1G65970	TPX2 AT1G65970	AT1G65970	2.54807	0.0264747	Up
AT3G26840	PES2	AT3G26840	2.54788	0.000359862	Up
AT4G39675	AT4G39675	AT4G39675	2.5467	0.0420536	Up
AT2G04100	AT2G04100	AT2G04100	2.54596	0.00363825	Up
AT1G46554	AT1G46554	AT1G46554	2.54159	8.53e-06	Up
AT1G11210	AT1G11210	AT1G11210	2.541	0.0286005	Up
AT5G24600	AT5G24600	AT5G24600	2.53888	0.0057617	Up
AT3G23170	AT3G23170	AT3G23170	2.53589	2e-05	Up
AT4G21980	APG8A	AT4G21980	2.52793	3.88e-07	Up
AT4G20260	PCAP1	AT4G20260	2.52474	4.62e-08	Up
AT1G63720	AT1G63720	AT1G63720	2.52443	0.0123819	Up
AT1G16530	ASL9	AT1G16530	2.52436	0.00330693	Up
AT2G31585	AT2G31585	AT2G31585	2.52297	5.26e-05	Up
AT1G16510	AT1G16510	AT1G16510	2.52085	0.00105162	Up
AT1G09500	AT1G09500	AT1G09500	2.52013	0.0254585	Up
ATMG00516	ATMG00516	ATMG00516	2.51601	0.000500906	Up
AT4G28280	LLG3	AT4G28280	2.50404	0.0222755	Up
AT1G49832	AT1G49832	AT1G49832	2.50218	0.000522015	Up
AT1G74020	SS2 AT1G74020	AT1G74020	2.50105	1.92e-05	Up
AT1G02400	GA2OX6	AT1G02400	2.49344	0.0222491	Up
AT1G62710	BETA-VPE	AT1G62710	2.49063	0.000200951	Up
AT4G15610	AT4G15610	AT4G15610	2.48727	0.0324594	Up
AT1G13830	AT1G13830	AT1G13830	2.48484	0.0286089	Up
AT5G04250	AT5G04250	AT5G04250	2.48409	0.00222002	Up
AT5G54470	BBX29	AT5G54470	2.48344	2.51e-07	Up
AT4G31240	AT4G31240	AT4G31240	2.48283	8.31e-05	Up
AT2G24545	AT2G24545	AT2G24545	2.48164	5.99e-05	Up
AT3G19660	AT3G19660	AT3G19660	2.48086	2.28e-06	Up
AT3G27330	AT3G27330	AT3G27330	2.48013	0.00276428	Up
AT1G31750	AT1G31750	AT1G31750	2.47719	0.0210109	Up
AT5G40960	AT5G40960	AT5G40960	2.47653	4.24e-08	Up
AT1G70500	AT1G70500	AT1G70500	2.47484	0.016871	Up
AT3G16900	AT3G16900	AT3G16900	2.47037	0.000739348	Up
AT5G02055	AT5G02055	AT5G02055	2.46957	0.0184239	Up
AT5G02020	SIS	AT5G02020	2.46886	0.00721025	Up
AT4G11543	AT4G11543	AT4G11543	2.46756	0.0302166	Up
AT4G18430	RABA1e	AT4G18430	2.46485	0.024623	Up
AT2G40110	AT2G40110	AT2G40110	2.46384	4.39e-05	Up
AT1G03620	AT1G03620	AT1G03620	2.46195	0.00146854	Up
AT2G18970	AT2G18970	AT2G18970	2.45915	0.0255749	Up
AT4G39270	AT4G39270	AT4G39270	2.45683	0.0102621	Up
AT4G16690	MES16	AT4G16690	2.45498	1.59e-06	Up
AT1G32920	AT1G32920	AT1G32920	2.45307	0.0102621	Up
AT2G22800	HAT9	AT2G22800	2.4512	3.7e-06	Up
AT1G61275	U12	AT1G61275	2.44923	1.73e-05	Up
AT1G28190	AT1G28190	AT1G28190	2.4486	0.0164272	Up
AT1G02816	AT1G02816	AT1G02816	2.44537	1.87e-10	Up
AT5G57785	AT5G57785	AT5G57785	2.43384	0.0181057	Up
AT5G04200	MC9	AT5G04200	2.43272	0.00150169	Up
AT3G63060	EDL3	AT3G63060	2.42766	0.0364347	Up
AT2G16890	AT2G16890	AT2G16890	2.42627	0.000609336	Up
AT5G06825	AT5G06825	AT5G06825	2.41897	0.0213749	Up
AT5G65207	AT5G65207	AT5G65207	2.41754	0.00110469	Up
AT3G27210	AT3G27210	AT3G27210	2.41412	0.00229206	Up
AT1G18075	ath-MIR159b	AT1G18075	2.41219	0.0001782	Up
AT1G77120	ADH1	AT1G77120	2.41181	0.00130887	Up
AT3G61890	HB-12	AT3G61890	2.41172	0.00103108	Up
AT1G69480	AT1G69480	AT1G69480	2.41006	0.0185649	Up
AT5G08445	AT5G08445	AT5G08445	2.41003	0.0175631	Up
AT3G19580	ZF2	AT3G19580	2.40734	0.012697	Up
AT5G09275	AT5G09275	AT5G09275	2.40724	0.0124605	Up
AT4G39361	AT4G39361	AT4G39361	2.4038	0.0324904	Up
AT4G27260	WES1	AT4G27260	2.40249	0.0150592	Up
AT5G25140	CYP71B13	AT5G25140	2.40165	0.00053294	Up
AT2G24040	AT2G24040	AT2G24040	2.39785	4.47e-13	Up
AT1G05523	AT1G05523	AT1G05523	2.39353	0.0389035	Up
AT2G46670	AT2G46670	AT2G46670	2.38837	1.8e-13	Up
AT5G44005	AT5G44005	AT5G44005	2.38757	3.91e-05	Up
AT5G58770	cPT4	AT5G58770	2.38708	0.000452239	Up
AT1G13740	AFP2	AT1G13740	2.38698	0.000207548	Up
AT3G51090	AT3G51090	AT3G51090	2.38607	1.75e-08	Up
AT3G50390	AT3G50390	AT3G50390	2.384	0.0394461	Up
AT2G39350	ABCG1	AT2G39350	2.37941	0.00165666	Up
AT2G29370	AT2G29370	AT2G29370	2.37748	0.0183099	Up
AT3G25640	AT3G25640	AT3G25640	2.37556	0.00265752	Up
AT5G40020	AT5G40020	AT5G40020	2.37316	0.000678491	Up
AT5G09440	EXL4 AT5G09440	AT5G09440	2.37162	0.0112693	Up
AT4G00200	AT4G00200	AT4G00200	2.37094	3.16e-06	Up
AT5G20670	AT5G20670	AT5G20670	2.36953	8.52e-07	Up
AT1G07040	AT1G07040	AT1G07040	2.36895	2.71e-06	Up
AT4G23680	AT4G23680	AT4G23680	2.3686	0.031048	Up
AT3G29000	AT3G29000	AT3G29000	2.36781	0.0466432	Up
AT5G49480	CP1 AT5G49480	AT5G49480	2.36642	0.000132099	Up
AT1G07900	LBD1	AT1G07900	2.3648	0.0361248	Up
AT3G14590	NTMC2T6.2	AT3G14590	2.36226	0.00690434	Up
AT2G14095	AT2G14095	AT2G14095	2.36051	0.0199832	Up
AT1G72240	AT1G72240	AT1G72240	2.35847	0.000316785	Up
AT2G45040	AT2G45040	AT2G45040	2.35791	0.0420951	Up
AT2G05540	AT2G05540	AT2G05540	2.3529	0.0366596	Up
ATMG00650	nad4L	ATMG00650	2.35137	0.00151164	Up
AT1G16850	AT1G16850	AT1G16850	2.34757	0.0099363	Up
AT2G37530	AT2G37530	AT2G37530	2.34724	0.0332536	Up
AT1G05000	PFA-DSP1	AT1G05000	2.34561	0.00912241	Up
AT3G02095	AT3G02095	AT3G02095	2.34436	0.0409174	Up
AT1G26930	AT1G26930	AT1G26930	2.34372	0.0052587	Up
AT5G65110	ACX2	AT5G65110	2.34085	0.00442858	Up
AT2G46690	AT2G46690	AT2G46690	2.33942	2.44e-05	Up
AT2G21620	RD2	AT2G21620	2.33873	1.86e-08	Up
AT3G58380	AT3G58380	AT3G58380	2.33821	0.0191851	Up
AT4G35770	SEN1 AT4G35770	AT4G35770	2.33774	0.0238694	Up
AT1G62620	AT1G62620	AT1G62620	2.33645	0.000285306	Up
AT5G44065	AT5G44065	AT5G44065	2.33175	0.0265809	Up
AT4G17215	AT4G17215	AT4G17215	2.33092	0.0115778	Up
AT5G35110	AT5G35110	AT5G35110	2.32687	0.0187997	Up
AT3G03240	AT3G03240	AT3G03240	2.32677	0.0483707	Up
AT3G09910	RABC2b	AT3G09910	2.31774	0.00346863	Up
AT1G77932	AT1G77932	AT1G77932	2.31522	0.0442208	Up
AT5G64230	AT5G64230	AT5G64230	2.31188	5.06e-05	Up
AT1G67865	AT1G67865	AT1G67865	2.31099	0.000995225	Up
AT5G11975	AT5G11975	AT5G11975	2.30098	0.0321914	Up
AT1G28470	NAC010	AT1G28470	2.29733	0.0186398	Up
AT1G69260	AFP1	AT1G69260	2.29696	0.0130586	Up
AT4G26950	AT4G26950	AT4G26950	2.29013	0.0035409	Up
AT1G29290	AT1G29290	AT1G29290	2.28959	0.0378374	Up
AT3G15760	AT3G15760	AT3G15760	2.28872	0.00554179	Up
AT4G36620	GATA19	AT4G36620	2.28849	0.00201163	Up
AT2G28110	FRA8	AT2G28110	2.28601	0.00518286	Up
AT5G25770	AT5G25770	AT5G25770	2.28558	5e-05	Up
AT3G45638	AT3G45638	AT3G45638	2.28231	0.00161637	Up
AT3G08275	AT3G08275	AT3G08275	2.28144	0.000578924	Up
AT3G60690	AT3G60690	AT3G60690	2.27961	0.000259471	Up
AT1G10585	AT1G10585	AT1G10585	2.27308	0.0115549	Up
AT4G22820	AT4G22820	AT4G22820	2.27267	2.44e-05	Up
AT1G35210	AT1G35210	AT1G35210	2.27232	0.036833	Up
AT1G21520	AT1G21520	AT1G21520	2.27198	0.00421207	Up
AT5G22788	AT5G22788	AT5G22788	2.27009	6.99e-06	Up
AT1G11190	BFN1	AT1G11190	2.26429	0.00160681	Up
AT5G24160	SQE6	AT5G24160	2.26302	0.000430305	Up
AT4G32870	AT4G32870	AT4G32870	2.26142	2.16e-05	Up
ATMG00640	ATMG00640	ATMG00640	2.26129	0.0113113	Up
AT1G10530	AT1G10530	AT1G10530	2.2606	0.0138337	Up
AT3G23870	AT3G23870	AT3G23870	2.25938	0.0148279	Up
AT2G07638	AT2G07638	AT2G07638	2.25788	0.0339662	Up
AT4G13660	PRR2	AT4G13660	2.25491	0.0332899	Up
AT3G61990	OMTF3	AT3G61990	2.25085	0.00319432	Up
AT1G09883	AT1G09883	AT1G09883	2.25026	0.0115941	Up
AT2G30230	AT2G30230	AT2G30230	2.24983	0.00162096	Up
AT5G13330	Rap2.6L	AT5G13330	2.2494	0.0372814	Up
AT1G02340	HFR1	AT1G02340	2.24845	0.0335425	Up
AT1G32385	AT1G32385	AT1G32385	2.24749	0.00442858	Up
AT5G43260	AT5G43260	AT5G43260	2.24322	6.63e-09	Up
AT4G01895	AT4G01895	AT4G01895	2.24084	0.0115242	Up
AT5G11090	AT5G11090	AT5G11090	2.24064	0.000404289	Up
AT5G66490	AT5G66490	AT5G66490	2.24053	0.000121159	Up
AT4G27410	RD26	AT4G27410	2.22944	0.0305004	Up
AT3G23920	BAM1 AT3G23920	AT3G23920	2.22929	1.23e-07	Up
AT2G18680	AT2G18680	AT2G18680	2.22817	0.0252454	Up
AT1G08230	AT1G08230	AT1G08230	2.22674	6.98e-06	Up
AT5G48180	NSP5	AT5G48180	2.22654	6.72e-08	Up
AT4G06410	AT4G06410	AT4G06410	2.22252	0.00115291	Up
AT1G66730	LIG6	AT1G66730	2.22155	5.5e-05	Up
AT5G49015	AT5G49015	AT5G49015	2.21944	8.82e-05	Up
AT3G05630	PLDP2	AT3G05630	2.21671	0.031433	Up
AT3G11600	AT3G11600	AT3G11600	2.21527	0.0006797	Up
AT1G07128	AT1G07128	AT1G07128	2.21424	0.00646835	Up
AT4G18800	RABA1d	AT4G18800	2.2141	2.94e-13	Up
AT1G15900	AT1G15900	AT1G15900	2.21382	0.00465795	Up
AT2G32050	AT2G32050	AT2G32050	2.21278	0.00977402	Up
AT2G32150	AT2G32150	AT2G32150	2.21185	0.00403675	Up
AT5G65210	TGA1	AT5G65210	2.20987	0.00229206	Up
AT4G10960	UGE5	AT4G10960	2.20541	0.002031	Up
AT5G34940	GUS3	AT5G34940	2.20242	0.00668401	Up
AT1G15405	AT1G15405	AT1G15405	2.20089	0.000676302	Up
AT5G10625	AT5G10625	AT5G10625	2.19725	0.0313375	Up
AT3G57540	AT3G57540	AT3G57540	2.19527	0.00086479	Up
AT4G22758	AT4G22758	AT4G22758	2.19498	3.84e-05	Up
AT1G74010	AT1G74010	AT1G74010	2.19455	0.00519648	Up
AT5G51070	ERD1	AT5G51070	2.19402	0.00192288	Up
AT5G06165	AT5G06165	AT5G06165	2.19311	0.000170342	Up
AT3G14560	AT3G14560	AT3G14560	2.18979	2.88e-06	Up
AT2G34340	AT2G34340	AT2G34340	2.18955	0.000810676	Up
AT3G61190	BAP1	AT3G61190	2.1873	0.0465104	Up
AT2G26310	FAP2	AT2G26310	2.18656	0.00738642	Up
AT5G01640	PRA1.B5	AT5G01640	2.18613	0.00867273	Up
AT5G24655	LSU4	AT5G24655	2.18417	0.000309242	Up
AT1G33102	AT1G33102	AT1G33102	2.18202	0.000464279	Up
AT5G22630	ADT5	AT5G22630	2.18118	0.00301169	Up
AT4G34060	DML3	AT4G34060	2.18079	0.00473077	Up
AT5G54840	SGP1	AT5G54840	2.18031	0.000127247	Up
AT2G48090	AT2G48090	AT2G48090	2.17891	0.00141228	Up
AT5G11110	SPS2F	AT5G11110	2.17138	0.000410647	Up
AT3G02445	AT3G02445	AT3G02445	2.1707	0.046691	Up
AT4G13030	AT4G13030	AT4G13030	2.16542	0.00106821	Up
AT5G02230	AT5G02230	AT5G02230	2.16464	0.000303896	Up
AT2G25680	MOT1	AT2G25680	2.15885	1.09e-05	Up
AT2G16790	AT2G16790	AT2G16790	2.15816	0.00912743	Up
AT1G75750	GASA1	AT1G75750	2.15518	0.0279431	Up
AT1G19180	JAZ1	AT1G19180	2.15096	0.0255223	Up
AT5G47960	RABA4C	AT5G47960	2.14867	0.0142085	Up
AT1G09400	AT1G09400	AT1G09400	2.1477	0.0244991	Up
AT2G07671	AT2G07671	AT2G07671	2.14611	8.47e-05	Up
AT5G01195	AT5G01195	AT5G01195	2.14245	0.0364235	Up
AT4G37150	MES9	AT4G37150	2.14163	0.00435132	Up
AT1G30250	AT1G30250	AT1G30250	2.14073	0.0205855	Up
AT4G37520	AT4G37520	AT4G37520	2.13844	0.0123095	Up
AT3G22750	AT3G22750	AT3G22750	2.13834	1.9e-05	Up
AT3G61450	SYP73	AT3G61450	2.13581	0.0162136	Up
AT1G25277	AT1G25277	AT1G25277	2.13536	5.4e-05	Up
AT3G04640	AT3G04640	AT3G04640	2.13518	0.049276	Up
AT5G10946	AT5G10946	AT5G10946	2.13278	0.00116213	Up
AT4G15563	AT4G15563	AT4G15563	2.13003	0.0240951	Up
AT1G76180	ERD14	AT1G76180	2.128	1.89e-08	Up
AT5G13820	TBP1 AT5G13820	AT5G13820	2.12606	0.000130202	Up
AT3G60640	ATG8G	AT3G60640	2.12576	7.36e-09	Up
AT1G69610	AT1G69610	AT1G69610	2.12539	0.000151788	Up
AT5G22250	CAF1b	AT5G22250	2.12189	0.0321853	Up
AT1G05163	AT1G05163	AT1G05163	2.12126	0.0009363	Up
AT5G39090	AT5G39090	AT5G39090	2.11507	0.00196907	Up
AT2G31570	GPX2	AT2G31570	2.11456	7.64e-14	Up
AT1G76705	AT1G76705	AT1G76705	2.11438	0.0148078	Up
AT3G51750	AT3G51750	AT3G51750	2.11278	0.000266782	Up
AT1G73880	UGT89B1	AT1G73880	2.11227	7.67e-06	Up
AT2G41200	AT2G41200	AT2G41200	2.11121	3.6e-09	Up
AT4G23450	AIRP1	AT4G23450	2.11041	0.0291174	Up
AT4G27745	AT4G27745	AT4G27745	2.10852	1.91e-05	Up
AT5G09800	AT5G09800	AT5G09800	2.10649	0.0036318	Up
AT1G63800	UBC5	AT1G63800	2.10422	0.000129524	Up
AT2G31990	AT2G31990	AT2G31990	2.10388	0.000774665	Up
AT5G53970	TAT7	AT5G53970	2.10319	1.16e-07	Up
AT1G77000	SKP2B	AT1G77000	2.09938	0.00301173	Up
AT5G63350	AT5G63350	AT5G63350	2.09919	0.0218719	Up
AT3G02410	ICME-LIKE2	AT3G02410	2.09589	0.0195619	Up
AT3G55470	AT3G55470	AT3G55470	2.09531	0.000447049	Up
ATMG00610	ATMG00610	ATMG00610	2.09494	0.000863065	Up
AT1G47560	SEC3B	AT1G47560	2.09036	0.00459562	Up
AT5G48412	AT5G48412	AT5G48412	2.08995	1.77e-05	Up
AT1G55610	BRL1	AT1G55610	2.08917	0.00831199	Up
AT1G55365	AT1G55365	AT1G55365	2.08811	0.0470222	Up
AT2G36220	AT2G36220	AT2G36220	2.08474	0.0114862	Up
AT2G07725	rpl5 AT2G07725	AT2G07725	2.08471	0.000634773	Up
AT3G51740	IMK2	AT3G51740	2.08244	0.0092973	Up
AT4G09695	AT4G09695	AT4G09695	2.08018	5.49e-05	Up
AT1G30040	GA2OX2	AT1G30040	2.07954	0.00621536	Up
AT1G22890	AT1G22890	AT1G22890	2.07695	0.0070065	Up
AT1G28390	AT1G28390	AT1G28390	2.07588	0.0337172	Up
AT2G07715	AT2G07715	AT2G07715	2.07587	0.00392343	Up
AT3G04175	AT3G04175	AT3G04175	2.07513	0.0154363	Up
AT3G55840	AT3G55840	AT3G55840	2.07438	0.0139723	Up
AT5G63905	AT5G63905	AT5G63905	2.07403	2.92e-06	Up
AT4G36900	RAP2.10	AT4G36900	2.0735	0.000360224	Up
AT5G55180	AT5G55180	AT5G55180	2.07083	0.00595607	Up
AT5G17280	AT5G17280	AT5G17280	2.06814	1.49e-21	Up
AT5G64660	CMPG2	AT5G64660	2.0662	0.00493506	Up
AT2G17710	AT2G17710	AT2G17710	2.06451	0.000379053	Up
AT2G18780	AT2G18780	AT2G18780	2.06282	3.52e-05	Up
AT2G18950	HPT1	AT2G18950	2.06173	1.75e-08	Up
AT3G23000	CIPK7	AT3G23000	2.05988	1.41e-06	Up
AT4G22760	AT4G22760	AT4G22760	2.05985	0.00154354	Up
AT1G61610	AT1G61610	AT1G61610	2.0589	0.0319646	Up
AT1G61560	MLO6	AT1G61560	2.05641	0.0198585	Up
AT3G12510	AT3G12510	AT3G12510	2.05386	0.0019517	Up
AT1G08800	AT1G08800	AT1G08800	2.05343	2.75e-06	Up
AT3G11410	PP2CA	AT3G11410	2.05093	0.000251624	Up
AT4G32940	GAMMA-VPE	AT4G32940	2.0498	0.00247246	Up
AT4G20930	AT4G20930	AT4G20930	2.04976	2.56e-05	Up
AT4G25390	AT4G25390	AT4G25390	2.04942	0.00695772	Up
ATMG00160	cox2	ATMG00160	2.04921	0.00328864	Up
AT5G46230	AT5G46230	AT5G46230	2.04716	0.000474255	Up
AT1G52080	AR791	AT1G52080	2.04471	0.000521419	Up
AT1G15110	PSS1	AT1G15110	2.04418	5.42e-05	Up
AT1G72060	AT1G72060	AT1G72060	2.04315	0.00288393	Up
AT3G07960	PIP5K6	AT3G07960	2.04303	0.0411773	Up
AT5G40510	AT5G40510	AT5G40510	2.04169	0.0315649	Up
AT3G27250	AT3G27250	AT3G27250	2.04129	0.0262122	Up
AT1G07150	MAPKKK13	AT1G07150	2.0411	0.0110574	Up
AT4G18290	KAT2	AT4G18290	2.04099	0.0129969	Up
AT3G10450	SCPL7	AT3G10450	2.03729	0.000661131	Up
ATMG01200	ATMG01200	ATMG01200	2.03719	0.0163343	Up
AT3G22160	AT3G22160	AT3G22160	2.03507	0.0474939	Up
AT1G67365	AT1G67365	AT1G67365	2.03166	0.00117156	Up
AT1G07130	STN1	AT1G07130	2.02732	4.04e-06	Up
AT1G54290	AT1G54290	AT1G54290	2.02612	2.57e-07	Up
AT3G50800	AT3G50800	AT3G50800	2.02585	0.0284456	Up
AT4G16790	AT4G16790	AT4G16790	2.02518	0.00018213	Up
AT4G17483	AT4G17483	AT4G17483	2.02084	0.0018306	Up
AT3G19960	ATM1	AT3G19960	2.02082	0.00010836	Up
AT4G12090	AT4G12090	AT4G12090	2.01959	0.0171543	Up
AT5G53920	AT5G53920	AT5G53920	2.01874	0.000463998	Up
AT4G35170	AT4G35170	AT4G35170	2.01789	0.0190929	Up
AT1G63370	AT1G63370	AT1G63370	2.01756	0.0110648	Up
AT2G38640	AT2G38640	AT2G38640	2.01563	0.000212199	Up
AT1G22065	AT1G22065	AT1G22065	2.01139	0.0192667	Up
AT5G15950	AT5G15950	AT5G15950	2.01092	5.86e-07	Up
AT5G24120	SIGE	AT5G24120	2.01006	0.0011106	Up
AT5G19875	AT5G19875	AT5G19875	2.00764	0.00850019	Up
AT2G45170	ATG8E	AT2G45170	2.00738	0.00853319	Up
AT5G04980	AT5G04980	AT5G04980	2.00648	0.00027818	Up
AT3G07725	AT3G07725	AT3G07725	2.00479	0.00057588	Up
AT5G45900	APG7	AT5G45900	2.00273	5.78e-06	Up
AT5G18130	AT5G18130	AT5G18130	2.00151	0.0492294	Up
AT4G15120	AT4G15120	AT4G15120	2.00013	0.00328552	Up
AT2G07727	AT2G07727	AT2G07727	1.99913	0.000937538	Up
AT1G61800	GPT2	AT1G61800	1.99762	0.0330692	Up
AT3G09520	EXO70H4	AT3G09520	1.99551	0.000253989	Up
AT1G79520	AT1G79520	AT1G79520	1.99508	7.47e-06	Up
AT3G11773	AT3G11773	AT3G11773	1.99492	0.0367715	Up
AT5G43170	ZF3	AT5G43170	1.99424	0.0445941	Up
AT1G66400	CML23	AT1G66400	1.99133	0.00547596	Up
AT4G17340	TIP2;2	AT4G17340	1.99058	0.00369089	Up
AT1G02390	GPAT2	AT1G02390	1.9893	0.00886164	Up
AT3G51660	AT3G51660	AT3G51660	1.98518	0.0126915	Up
AT3G21700	SGP2	AT3G21700	1.98343	0.000116243	Up
AT1G67856	AT1G67856	AT1G67856	1.98264	0.036238	Up
AT2G25964	AT2G25964	AT2G25964	1.97977	3.45e-05	Up
AT3G05870	APC11	AT3G05870	1.9778	6.28e-24	Up
AT5G67160	EPS1	AT5G67160	1.977	0.000203999	Up
AT1G06180	MYB13	AT1G06180	1.97521	0.00609148	Up
AT2G43060	IBH1	AT2G43060	1.97506	0.000347889	Up
AT4G34230	CAD5	AT4G34230	1.97447	0.000868057	Up
AT1G15772	AT1G15772	AT1G15772	1.97244	0.00618066	Up
AT2G23790	AT2G23790	AT2G23790	1.96979	2.88e-07	Up
AT4G39925	AT4G39925	AT4G39925	1.96822	3.43e-05	Up
AT3G52800	AT3G52800	AT3G52800	1.96696	0.00092657	Up
AT1G23130	AT1G23130	AT1G23130	1.96395	0.00301465	Up
AT1G62610	AT1G62610	AT1G62610	1.96391	1.85e-05	Up
AT3G47420	G3Pp1	AT3G47420	1.96304	0.000113259	Up
AT5G57050	ABI2	AT5G57050	1.95935	0.00130459	Up
AT3G14430	AT3G14430	AT3G14430	1.9561	7.36e-09	Up
AT5G64310	AGP1	AT5G64310	1.95351	0.0416196	Up
AT2G37580	AT2G37580	AT2G37580	1.95174	0.000459473	Up
AT3G47540	AT3G47540	AT3G47540	1.94937	0.00449121	Up
AT1G12640	LPLAT1	AT1G12640	1.94915	1.12e-12	Up
AT5G40240	UMAMIT40	AT5G40240	1.94873	0.0208726	Up
AT3G18950	AT3G18950	AT3G18950	1.94795	0.00126684	Up
AT3G21790	AT3G21790	AT3G21790	1.94623	3.61e-06	Up
AT3G09480	AT3G09480	AT3G09480	1.94617	0.0455242	Up
AT5G66650	AT5G66650	AT5G66650	1.94259	0.0392419	Up
AT4G32250	AT4G32250	AT4G32250	1.94224	7.32e-06	Up
AT5G56540	AGP14	AT5G56540	1.9422	0.00272471	Up
AT2G30942	AT2G30942	AT2G30942	1.94146	0.000209109	Up
AT2G22790	AT2G22790	AT2G22790	1.93972	0.00694184	Up
AT1G22190	AT1G22190	AT1G22190	1.93917	0.000321183	Up
AT3G09085	AT3G09085	AT3G09085	1.93869	5.32e-13	Up
AT1G23440	AT1G23440	AT1G23440	1.93672	6.85e-05	Up
AT2G28200	AT2G28200	AT2G28200	1.93595	1.31e-06	Up
AT1G02860	NLA	AT1G02860	1.93533	0.000277128	Up
AT5G46180	DELTA-OAT	AT5G46180	1.93256	1.7e-05	Up
AT1G20120	AT1G20120	AT1G20120	1.93197	0.00689609	Up
AT5G50930	AT5G50930	AT5G50930	1.9316	0.0138565	Up
AT3G02800	PFA-DSP3	AT3G02800	1.93133	0.0366125	Up
AT1G34110	AT1G34110	AT1G34110	1.92782	2.53e-05	Up
AT5G27350	SFP1	AT5G27350	1.92656	0.00120577	Up
AT2G31130	AT2G31130	AT2G31130	1.92439	7.55e-05	Up
ATMG00210	rpl5 ATMG00210	ATMG00210	1.92086	0.0163438	Up
AT5G16450	AT5G16450	AT5G16450	1.91966	6.86e-09	Up
AT3G05880	RCI2A	AT3G05880	1.91754	0.00105199	Up
AT3G09390	MT2A	AT3G09390	1.91634	0.00244867	Up
AT2G38870	AT2G38870	AT2G38870	1.91522	0.0418506	Up
AT4G27280	AT4G27280	AT4G27280	1.91285	0.0331516	Up
AT1G73500	MKK9	AT1G73500	1.91271	0.00340182	Up
AT4G18580	AT4G18580	AT4G18580	1.9111	0.000384232	Up
AT1G29195	AT1G29195	AT1G29195	1.90856	0.000106972	Up
AT2G33150	PKT3	AT2G33150	1.90491	4.37e-08	Up
AT5G25820	AT5G25820	AT5G25820	1.90266	0.0387349	Up
AT1G58190	RLP9	AT1G58190	1.89822	0.0247863	Up
AT5G11650	AT5G11650	AT5G11650	1.89803	8.62e-05	Up
AT1G04277	AT1G04277	AT1G04277	1.89801	0.0246499	Up
AT5G40390	SIP1 AT5G40390	AT5G40390	1.89597	0.000681075	Up
AT1G55265	AT1G55265	AT1G55265	1.89498	0.00682008	Up
AT3G11570	TBL8	AT3G11570	1.89384	0.0240016	Up
AT5G01445	AT5G01445	AT5G01445	1.88806	0.00640938	Up
AT5G13800	PPH	AT5G13800	1.88622	2.69e-06	Up
AT1G72770	HAB1	AT1G72770	1.88605	3.97e-05	Up
AT1G52855	AT1G52855	AT1G52855	1.88601	0.000204552	Up
AT2G41450	AT2G41450	AT2G41450	1.88431	0.0174298	Up
AT4G02075	PIT1	AT4G02075	1.88335	0.0224017	Up
AT3G17820	GLN1.3	AT3G17820	1.88267	1.47e-05	Up
AT5G43780	APS4	AT5G43780	1.88097	0.0152086	Up
AT4G16110	AT4G16110	AT4G16110	1.87996	2.13e-06	Up
AT2G08900	AT2G08900	AT2G08900	1.87943	0.00750626	Up
AT3G29575	AFP3	AT3G29575	1.87748	0.00111239	Up
ATMG01360	cox1	ATMG01360	1.87604	0.000306685	Up
AT1G01640	AT1G01640	AT1G01640	1.87498	0.000346152	Up
AT2G26355	AT2G26355	AT2G26355	1.87451	0.000452487	Up
AT3G11591	AT3G11591	AT3G11591	1.87295	0.0128152	Up
AT2G37170	PIP2B	AT2G37170	1.87232	0.000759995	Up
AT2G41505	AT2G41505	AT2G41505	1.87173	0.0106328	Up
AT3G19900	AT3G19900	AT3G19900	1.87167	3.96e-12	Up
ATMG00560	rpl2 ATMG00560	ATMG00560	1.86973	0.0255513	Up
AT3G25590	AT3G25590	AT3G25590	1.86927	2.58e-05	Up
AT5G43620	AT5G43620	AT5G43620	1.86814	0.00556175	Up
AT1G23010	LPR1	AT1G23010	1.86782	0.00359314	Up
AT3G03460	AT3G03460	AT3G03460	1.86427	0.0124327	Up
AT5G41400	AT5G41400	AT5G41400	1.864	0.000133158	Up
AT5G55850	NOI	AT5G55850	1.86244	8.61e-08	Up
AT4G06305	AT4G06305	AT4G06305	1.8618	0.0222765	Up
AT5G54080	HGO	AT5G54080	1.8598	0.000286498	Up
AT3G07730	AT3G07730	AT3G07730	1.85862	0.00280731	Up
AT4G03490	AT4G03490	AT4G03490	1.85511	8.22e-14	Up
AT1G69310	WRKY57	AT1G69310	1.85471	0.00389972	Up
AT5G40460	AT5G40460	AT5G40460	1.85067	0.0326808	Up
AT5G11520	ASP3	AT5G11520	1.84998	1.73e-06	Up
AT3G23200	AT3G23200	AT3G23200	1.84571	5.99e-06	Up
AT1G48745	AT1G48745	AT1G48745	1.84558	0.000390474	Up
AT5G03230	AT5G03230	AT5G03230	1.84433	0.00861186	Up
AT1G60610	AT1G60610	AT1G60610	1.84269	0.000575408	Up
AT1G69810	WRKY36	AT1G69810	1.84257	0.0086053	Up
AT1G31820	PUT1	AT1G31820	1.84118	0.0385578	Up
AT3G54950	pPLAIIIbeta	AT3G54950	1.83744	2.6e-05	Up
AT1G22400	UGT85A1	AT1G22400	1.8353	0.0486051	Up
AT1G60960	IRT3	AT1G60960	1.83435	0.00622327	Up
AT3G03870	AT3G03870	AT3G03870	1.83367	0.0237453	Up
AT2G45023	AT2G45023	AT2G45023	1.83303	7.29e-06	Up
ATMG09740	ATMG09740	ATMG09740	1.83289	0.00741195	Up
AT3G22930	CML11	AT3G22930	1.83149	0.0193125	Up
AT5G65495	AT5G65495	AT5G65495	1.83066	2.53e-10	Up
AT1G54210	ATG12A	AT1G54210	1.83007	0.000122041	Up
AT1G77450	NAC032	AT1G77450	1.82939	0.026867	Up
AT5G10770	AT5G10770	AT5G10770	1.82781	0.00979254	Up
AT1G67360	AT1G67360	AT1G67360	1.82591	0.00258647	Up
AT4G18950	AT4G18950	AT4G18950	1.82493	0.002031	Up
AT2G07042	AT2G07042	AT2G07042	1.82492	0.011292	Up
AT1G21550	AT1G21550	AT1G21550	1.8231	0.0337748	Up
AT4G14305	AT4G14305	AT4G14305	1.82258	0.000138738	Up
AT3G51730	AT3G51730	AT3G51730	1.8185	0.000727249	Up
AT5G04545	AT5G04545	AT5G04545	1.81621	0.000492897	Up
AT1G47128	RD21A	AT1G47128	1.81167	4.62e-05	Up
AT5G08565	AT5G08565	AT5G08565	1.81057	3.23e-07	Up
AT1G78172	AT1G78172	AT1G78172	1.8078	0.0344621	Up
AT1G21920	AT1G21920	AT1G21920	1.80693	0.000405798	Up
AT5G64370	BETA-UP	AT5G64370	1.80464	0.000158497	Up
AT1G78310	AT1G78310	AT1G78310	1.80116	0.000122962	Up
AT5G61800	AT5G61800	AT5G61800	1.79876	0.048597	Up
ATMG01080	atp9	ATMG01080	1.79856	0.00130397	Up
AT5G49280	AT5G49280	AT5G49280	1.79842	0.000330704	Up
AT5G67490	AT5G67490	AT5G67490	1.7982	4.74e-09	Up
AT2G43500	AT2G43500	AT2G43500	1.79602	0.000129246	Up
AT5G62260	AT5G62260	AT5G62260	1.79579	0.0477268	Up
AT1G52720	AT1G52720	AT1G52720	1.78907	0.00130419	Up
AT1G21770	AT1G21770	AT1G21770	1.7874	8.14e-07	Up
ATMG01280	ATMG01280	ATMG01280	1.78593	0.0214567	Up
AT1G22930	AT1G22930	AT1G22930	1.78406	0.00105199	Up
AT2G21188	AT2G21188	AT2G21188	1.78388	0.0163359	Up
AT1G13990	AT1G13990	AT1G13990	1.78344	0.0366534	Up
AT1G13340	AT1G13340	AT1G13340	1.78228	0.0276663	Up
AT3G04165	AT3G04165	AT3G04165	1.77894	0.0293495	Up
AT3G51440	AT3G51440	AT3G51440	1.77834	0.0445073	Up
AT3G08760	ATSIK	AT3G08760	1.77833	0.000554819	Up
AT1G36380	AT1G36380	AT1G36380	1.77803	1.89e-05	Up
AT1G49032	AT1G49032	AT1G49032	1.77797	0.000276956	Up
AT5G13750	ZIFL1	AT5G13750	1.77646	6e-05	Up
AT3G44450	AT3G44450	AT3G44450	1.77623	0.00157377	Up
AT1G25275	AT1G25275	AT1G25275	1.77431	4.43e-05	Up
AT3G10985	SAG20	AT3G10985	1.77183	0.00659577	Up
AT1G77880	AT1G77880	AT1G77880	1.76935	0.0449149	Up
AT5G07080	AT5G07080	AT5G07080	1.76863	0.028288	Up
AT5G14700	AT5G14700	AT5G14700	1.76652	0.000405973	Up
AT1G06570	PDS1	AT1G06570	1.76627	1.43e-06	Up
AT2G35945	AT2G35945	AT2G35945	1.76585	0.000403438	Up
AT1G08507	AT1G08507	AT1G08507	1.76583	0.00488803	Up
AT5G44210	ERF9	AT5G44210	1.76548	0.0299752	Up
AT3G22550	AT3G22550	AT3G22550	1.76416	0.0497644	Up
AT4G22270	MRB1	AT4G22270	1.76147	0.000358044	Up
AT2G15960	AT2G15960	AT2G15960	1.75951	0.0167265	Up
AT4G32070	Phox4	AT4G32070	1.75878	2.57e-06	Up
AT4G37530	AT4G37530	AT4G37530	1.75693	0.037665	Up
AT1G54130	RSH3 AT1G54130	AT1G54130	1.75406	0.00404369	Up
AT4G03320	Tic20-IV	AT4G03320	1.75244	0.0486031	Up
AT2G01540	AT2G01540	AT2G01540	1.7524	9.9e-06	Up
AT3G02875	ILR1	AT3G02875	1.75166	2.97e-05	Up
AT4G37320	CYP81D5	AT4G37320	1.75101	0.00048814	Up
AT2G07687	AT2G07687	AT2G07687	1.75045	0.0124327	Up
AT1G72200	AT1G72200	AT1G72200	1.75031	0.0226957	Up
AT3G26290	CYP71B26	AT3G26290	1.75021	0.00360944	Up
AT5G07730	AT5G07730	AT5G07730	1.74391	1.86e-05	Up
AT4G24590	AT4G24590	AT4G24590	1.74306	3.01e-10	Up
AT5G47560	TDT	AT5G47560	1.74286	0.0115778	Up
AT1G25370	AT1G25370	AT1G25370	1.74198	0.00146647	Up
AT5G54730	G18F	AT5G54730	1.74142	0.000366506	Up
AT1G70780	AT1G70780	AT1G70780	1.73943	4.02e-06	Up
AT1G44770	AT1G44770	AT1G44770	1.73895	1.31e-05	Up
AT3G17000	UBC32	AT3G17000	1.73869	0.00138499	Up
AT1G70300	KUP6	AT1G70300	1.7371	0.00978449	Up
AT1G73390	AT1G73390	AT1G73390	1.73628	7.57e-05	Up
AT1G72800	AT1G72800	AT1G72800	1.73588	0.00786153	Up
AT3G19030	AT3G19030	AT3G19030	1.73427	0.00232478	Up
AT1G53030	AT1G53030	AT1G53030	1.73259	4.67e-07	Up
AT3G57020	AT3G57020	AT3G57020	1.7308	0.000251735	Up
AT5G05110	AT5G05110	AT5G05110	1.72882	0.0024162	Up
AT1G09740	AT1G09740	AT1G09740	1.72783	0.00162955	Up
AT5G47060	AT5G47060	AT5G47060	1.72671	0.000237616	Up
AT4G18630	AT4G18630	AT4G18630	1.72467	0.0210065	Up
AT3G44880	ACD1	AT3G44880	1.72459	7.95e-06	Up
AT4G35110	AT4G35110	AT4G35110	1.72435	0.0344408	Up
AT1G32690	AT1G32690	AT1G32690	1.72405	0.00176634	Up
AT2G46030	UBC6	AT2G46030	1.72354	2.7e-05	Up
AT5G65609	AT5G65609	AT5G65609	1.72181	0.0260008	Up
AT1G52347	AT1G52347	AT1G52347	1.72109	1.31e-06	Up
AT4G37790	HAT22	AT4G37790	1.72056	6.88e-05	Up
AT1G53560	AT1G53560	AT1G53560	1.71903	0.000622812	Up
AT4G04620	ATG8B	AT4G04620	1.71892	4.32e-05	Up
AT1G32170	XTH30	AT1G32170	1.71748	0.027965	Up
AT2G30362	AT2G30362	AT2G30362	1.71504	0.0382752	Up
AT5G27520	PNC2	AT5G27520	1.71473	0.00747093	Up
AT1G69870	NRT1.7	AT1G69870	1.7146	0.00444997	Up
AT5G22850	AT5G22850	AT5G22850	1.71437	6.27e-07	Up
AT4G18050	ABCB9	AT4G18050	1.71362	0.00998077	Up
AT1G56165	AT1G56165	AT1G56165	1.71244	0.0164867	Up
AT2G07773	AT2G07773	AT2G07773	1.71093	0.0269725	Up
AT1G21010	AT1G21010	AT1G21010	1.7108	8.29e-05	Up
AT5G46720	AT5G46720	AT5G46720	1.71024	9.43e-08	Up
AT1G69230	SP1L2	AT1G69230	1.70922	0.0042429	Up
AT1G28230	PUP1	AT1G28230	1.7056	0.00608526	Up
AT1G13970	AT1G13970	AT1G13970	1.70394	0.0170459	Up
AT5G43380	TOPP6	AT5G43380	1.70161	0.013709	Up
AT5G04750	AT5G04750	AT5G04750	1.70018	7.56e-05	Up
AT4G18210	PUP10	AT4G18210	1.69941	0.0135523	Up
AT2G31680	RABA5d	AT2G31680	1.69811	4.16e-08	Up
AT1G22403	AT1G22403	AT1G22403	1.69668	2.17e-06	Up
AT3G56170	CAN	AT3G56170	1.69362	0.000110854	Up
AT1G30820	AT1G30820	AT1G30820	1.69237	0.000656795	Up
AT3G54680	AT3G54680	AT3G54680	1.69133	2.22e-05	Up
AT1G56145	AT1G56145	AT1G56145	1.6912	0.00488646	Up
AT1G53170	ERF8	AT1G53170	1.69027	0.00112151	Up
AT2G16700	ADF5	AT2G16700	1.68779	7.47e-05	Up
AT3G10740	ASD1	AT3G10740	1.68665	0.000197296	Up
AT1G31350	KUF1	AT1G31350	1.68659	4.89e-05	Up
AT3G03550	AT3G03550	AT3G03550	1.68647	2.4e-05	Up
AT5G46350	WRKY8	AT5G46350	1.68567	0.00627604	Up
AT1G76760	TY1	AT1G76760	1.68163	0.00136301	Up
AT5G53350	CLPX	AT5G53350	1.67895	8.87e-07	Up
AT1G72890	AT1G72890	AT1G72890	1.67892	0.0356559	Up
AT5G54130	AT5G54130	AT5G54130	1.67891	0.0172289	Up
AT4G34881	AT4G34881	AT4G34881	1.67872	0.00165342	Up
AT2G46270	GBF3	AT2G46270	1.67714	0.0186811	Up
AT3G57450	AT3G57450	AT3G57450	1.67553	0.0149928	Up
AT3G17810	PYD1	AT3G17810	1.67455	0.000300506	Up
AT4G18830	OFP5	AT4G18830	1.67414	0.019593	Up
AT1G30475	AT1G30475	AT1G30475	1.67153	0.000656471	Up
AT4G29820	CFIM-25	AT4G29820	1.67024	0.000931824	Up
AT2G08915	AT2G08915	AT2G08915	1.66851	0.0148378	Up
AT1G08930	ERD6	AT1G08930	1.66582	0.0409448	Up
AT3G55560	AGF2	AT3G55560	1.66439	0.00616833	Up
AT5G63880	VPS20.1	AT5G63880	1.66405	4.76e-05	Up
AT1G78230	AT1G78230	AT1G78230	1.66301	8.47e-05	Up
AT5G06190	AT5G06190	AT5G06190	1.66288	0.000128122	Up
AT3G10420	SPD1	AT3G10420	1.66093	0.00441466	Up
AT5G15970	KIN2	AT5G15970	1.6603	0.018756	Up
AT4G15490	UGT84A3	AT4G15490	1.65989	0.000778144	Up
AT4G30390	AT4G30390	AT4G30390	1.6593	0.000170584	Up
AT2G41410	AT2G41410	AT2G41410	1.65655	1.12e-05	Up
AT1G53580	GLY3	AT1G53580	1.65516	2.28e-05	Up
AT3G51970	ASAT1	AT3G51970	1.6544	0.0019545	Up
AT5G58570	AT5G58570	AT5G58570	1.65417	0.0469117	Up
AT3G22942	AGG2	AT3G22942	1.65391	7.24e-05	Up
AT1G52540	AT1G52540	AT1G52540	1.65387	2.63e-10	Up
AT2G27500	AT2G27500	AT2G27500	1.6535	0.0418993	Up
AT5G61640	PMSR1	AT5G61640	1.65077	0.00184985	Up
AT2G43230	AT2G43230	AT2G43230	1.65074	0.0103431	Up
AT4G24040	TRE1	AT4G24040	1.64967	0.0414407	Up
AT5G53830	AT5G53830	AT5G53830	1.6483	0.0417949	Up
AT3G13720	PRA8	AT3G13720	1.64692	2.39e-08	Up
AT4G38810	AT4G38810	AT4G38810	1.6469	1.6e-05	Up
AT3G21510	AHP1	AT3G21510	1.64664	0.00425062	Up
AT1G77770	AT1G77770	AT1G77770	1.64653	2.68e-06	Up
AT5G44569	AT5G44569	AT5G44569	1.64646	0.00861186	Up
AT3G15300	AT3G15300	AT3G15300	1.64625	0.00371394	Up
AT1G76070	AT1G76070	AT1G76070	1.64559	0.0435208	Up
AT1G01520	ASG4	AT1G01520	1.64557	0.00838105	Up
AT1G24851	AT1G24851	AT1G24851	1.6453	0.0401992	Up
AT1G25180	AT1G25180	AT1G25180	1.64523	0.042302	Up
AT3G03520	NPC3	AT3G03520	1.64451	0.0109938	Up
AT3G05200	ATL6	AT3G05200	1.64284	0.0361676	Up
AT1G04247	AT1G04247	AT1G04247	1.64273	0.0456716	Up
AT3G13710	PRA1.F4	AT3G13710	1.63976	0.00121074	Up
AT3G13700	AT3G13700	AT3G13700	1.63976	0.00120929	Up
AT4G22780	ACR7	AT4G22780	1.63914	0.0190862	Up
AT1G27300	AT1G27300	AT1G27300	1.63907	0.00421969	Up
AT3G03440	AT3G03440	AT3G03440	1.6383	0.00268394	Up
AT5G12190	AT5G12190	AT5G12190	1.63798	1.48e-10	Up
AT2G46390	SDH8	AT2G46390	1.63718	6.54e-07	Up
AT5G52540	AT5G52540	AT5G52540	1.63687	0.00340182	Up
AT3G12630	SAP5	AT3G12630	1.63459	7.72e-08	Up
AT5G13880	AT5G13880	AT5G13880	1.63313	0.00888481	Up
AT1G14200	AT1G14200	AT1G14200	1.63099	0.0265823	Up
AT1G55020	LOX1	AT1G55020	1.62829	0.0210709	Up
AT1G32460	AT1G32460	AT1G32460	1.62613	4.7e-05	Up
AT3G61060	PP2-A13	AT3G61060	1.62426	0.028288	Up
AT1G77920	TGA7	AT1G77920	1.62351	0.0334484	Up
AT5G47550	AT5G47550	AT5G47550	1.62337	0.00674472	Up
ATMG00510	nad7	ATMG00510	1.62329	0.0302432	Up
AT5G56230	PRA1.G2	AT5G56230	1.62166	0.0139688	Up
AT2G43540	AT2G43540	AT2G43540	1.62037	2.01e-05	Up
AT3G01350	AT3G01350	AT3G01350	1.61884	0.0405101	Up
AT1G01570	AT1G01570	AT1G01570	1.61871	0.0253552	Up
AT1G62422	AT1G62422	AT1G62422	1.61857	0.0290929	Up
AT2G01010	AT2G01010	AT2G01010	1.61807	0.00106178	Up
AT2G46790	PRR9	AT2G46790	1.6178	1.24e-07	Up
AT1G55760	AT1G55760	AT1G55760	1.61758	0.00839018	Up
AT1G74740	CPK30	AT1G74740	1.61714	0.000176336	Up
AT1G77660	AT1G77660	AT1G77660	1.61663	0.00552589	Up
AT3G50650	AT3G50650	AT3G50650	1.61553	0.00512029	Up
AT1G43910	AT1G43910	AT1G43910	1.61423	0.00860975	Up
AT4G26080	ABI1	AT4G26080	1.61383	0.000819048	Up
AT5G67300	MYBR1	AT5G67300	1.61294	0.00547101	Up
AT1G13448	AT1G13448	AT1G13448	1.61253	0.0308429	Up
AT5G26731	AT5G26731	AT5G26731	1.61246	0.00209849	Up
AT5G54240	AT5G54240	AT5G54240	1.61173	0.00600723	Up
AT2G07815	AT2G07815	AT2G07815	1.61144	0.0317081	Up
AT5G03905	AT5G03905	AT5G03905	1.61015	4.02e-07	Up
ATMG00110	ccb206	ATMG00110	1.60909	0.00608235	Up
AT4G39838	AT4G39838	AT4G39838	1.60781	0.00136442	Up
AT5G61290	AT5G61290	AT5G61290	1.60733	0.00245777	Up
AT1G14330	AT1G14330	AT1G14330	1.60585	0.00183519	Up
AT4G33565	AT4G33565	AT4G33565	1.60414	6.51e-05	Up
AT3G15040	AT3G15040	AT3G15040	1.59703	6.34e-09	Up
AT2G46620	AT2G46620	AT2G46620	1.59679	0.0431746	Up
AT1G08180	AT1G08180	AT1G08180	1.5948	0.000458743	Up
AT2G08905	AT2G08905	AT2G08905	1.5946	0.0477617	Up
AT4G29850	AT4G29850	AT4G29850	1.5938	0.0146518	Up
AT3G59210	AT3G59210	AT3G59210	1.58807	4.96e-05	Up
AT5G48670	AGL80	AT5G48670	1.58805	0.000499809	Up
AT4G36720	HVA22K	AT4G36720	1.587	1.2e-07	Up
AT3G02290	AT3G02290	AT3G02290	1.58666	4.02e-06	Up
AT1G15350	AT1G15350	AT1G15350	1.58482	3.41e-05	Up
AT5G04220	SYTC	AT5G04220	1.58296	0.0256279	Up
AT2G19880	AT2G19880	AT2G19880	1.58246	4.15e-10	Up
AT4G01610	AT4G01610	AT4G01610	1.58147	0.00625979	Up
AT4G21215	AT4G21215	AT4G21215	1.58096	7.92e-05	Up
AT3G55740	PROT2	AT3G55740	1.58062	4.16e-06	Up
AT3G53730	AT3G53730	AT3G53730	1.5789	0.000627231	Up
AT1G17080	AT1G17080	AT1G17080	1.5766	1.67e-06	Up
AT5G01610	AT5G01610	AT5G01610	1.57652	0.014229	Up
AT5G06280	AT5G06280	AT5G06280	1.57482	3.63e-05	Up
AT2G07718	AT2G07718	AT2G07718	1.57438	3.73e-05	Up
AT1G01470	LEA14	AT1G01470	1.5739	0.014206	Up
AT1G03290	AT1G03290	AT1G03290	1.57364	0.00377588	Up
AT5G61430	NAC100	AT5G61430	1.56665	0.0413864	Up
AT4G13250	NYC1	AT4G13250	1.56479	0.00174463	Up
AT3G58710	WRKY69	AT3G58710	1.56459	0.00317948	Up
AT3G03450	RGL2	AT3G03450	1.56249	0.00168895	Up
AT1G20450	ERD10	AT1G20450	1.56222	0.00971798	Up
AT1G15310	ATHSRP54A	AT1G15310	1.5609	0.0378788	Up
AT5G40370	GRXC2	AT5G40370	1.55971	3.64e-05	Up
AT5G07220	BAG3	AT5G07220	1.55728	5.62e-09	Up
AT5G44980	AT5G44980	AT5G44980	1.5571	0.010128	Up
AT3G15750	AT3G15750	AT3G15750	1.55659	0.00317948	Up
AT5G04760	AT5G04760	AT5G04760	1.55636	0.00299149	Up
AT1G52880	NAM	AT1G52880	1.55512	0.0194758	Up
AT1G50290	AT1G50290	AT1G50290	1.55405	0.000444097	Up
AT1G21400	AT1G21400	AT1G21400	1.5538	0.0137544	Up
AT5G61900	BON1	AT5G61900	1.55331	0.0445874	Up
AT5G52990	AT5G52990	AT5G52990	1.55146	0.00708589	Up
AT1G55080	MED9	AT1G55080	1.55079	2.92e-06	Up
AT1G44170	ALDH3H1	AT1G44170	1.55016	2.64e-07	Up
AT1G16730	UP6	AT1G16730	1.54852	0.00594861	Up
AT5G49550	BLOS2	AT5G49550	1.54653	2.78e-11	Up
AT1G80120	AT1G80120	AT1G80120	1.54546	0.0259385	Up
AT5G53870	ENODL1	AT5G53870	1.54455	0.0369675	Up
AT1G79270	ECT8	AT1G79270	1.54346	0.00212086	Up
AT5G67140	AT5G67140	AT5G67140	1.54251	0.00214202	Up
ATMG00180	ccmFC	ATMG00180	1.54243	0.00819034	Up
AT4G30490	AT4G30490	AT4G30490	1.54208	0.00373751	Up
AT1G05620	URH2	AT1G05620	1.54144	8.22e-07	Up
AT1G59700	GSTU16	AT1G59700	1.54111	0.000268673	Up
AT2G23150	NRAMP3	AT2G23150	1.53954	0.000605599	Up
AT5G43060	RD21B	AT5G43060	1.53908	0.00114288	Up
AT5G55170	SUMO3	AT5G55170	1.53851	0.00641532	Up
AT1G45163	AT1G45163	AT1G45163	1.53766	0.000153422	Up
AT2G03980	AT2G03980	AT2G03980	1.53611	0.00108588	Up
AT5G27920	AT5G27920	AT5G27920	1.53568	0.0129011	Up
AT3G15580	APG8H	AT3G15580	1.53224	3.92e-05	Up
AT1G17090	AT1G17090	AT1G17090	1.53214	9.77e-05	Up
AT5G53750	AT5G53750	AT5G53750	1.53159	0.0305004	Up
AT4G19645	AT4G19645	AT4G19645	1.52947	0.0282421	Up
AT2G01175	AT2G01175	AT2G01175	1.52938	0.0206809	Up
AT3G03310	LCAT3	AT3G03310	1.52875	0.00263461	Up
AT1G66725	ath-MIR163	AT1G66725	1.52817	0.00675541	Up
AT1G19396	AT1G19396	AT1G19396	1.52743	0.00107674	Up
AT5G58620	AT5G58620	AT5G58620	1.52575	0.00159554	Up
AT3G61113	AT3G61113	AT3G61113	1.52562	0.0324713	Up
AT1G23140	AT1G23140	AT1G23140	1.52551	0.033275	Up
AT5G41800	AT5G41800	AT5G41800	1.52494	0.00010456	Up
AT1G08920	ESL1	AT1G08920	1.52403	0.00229723	Up
AT1G03340	AT1G03340	AT1G03340	1.52399	0.0045346	Up
AT4G13195	CLE44	AT4G13195	1.52367	0.0011589	Up
AT3G48570	AT3G48570	AT3G48570	1.52346	8.04e-11	Up
AT3G62020	GLP10	AT3G62020	1.52066	0.0181511	Up
AT3G12070	RGTB2	AT3G12070	1.5206	0.0175181	Up
AT5G59840	AT5G59840	AT5G59840	1.51988	9.82e-14	Up
AT2G05630	ATG8D	AT2G05630	1.51884	0.00027502	Up
AT3G52105	AT3G52105	AT3G52105	1.51749	1.06e-06	Up
AT5G59400	AT5G59400	AT5G59400	1.51685	3.51e-07	Up
AT4G30790	AT4G30790	AT4G30790	1.51674	0.000335698	Up
AT1G47480	AT1G47480	AT1G47480	1.51649	0.0115401	Up
AT3G16565	AT3G16565	AT3G16565	1.51578	0.0154475	Up
AT2G02870	AT2G02870	AT2G02870	1.51451	6.89e-06	Up
AT1G01780	PLIM2b	AT1G01780	1.51428	0.000298791	Up
AT3G41768	AT3G41768	AT3G41768	1.51172	0.00225955	Up
AT4G39364	AT4G39364	AT4G39364	1.51155	0.00763684	Up
AT1G80110	PP2-B11	AT1G80110	1.51026	0.0251214	Up
AT5G67600	WIH1	AT5G67600	1.50873	0.000878899	Up
AT3G53990	AT3G53990	AT3G53990	1.50615	4.21e-05	Up
AT5G11970	AT5G11970	AT5G11970	1.50593	0.00566747	Up
AT3G51430	YLS2	AT3G51430	1.50515	0.0418665	Up
AT1G29800	AT1G29800	AT1G29800	1.50479	0.00127658	Up
AT5G47860	AT5G47860	AT5G47860	1.50197	0.002389	Up
AT4G02370	AT4G02370	AT4G02370	1.50165	3.79e-05	Up
AT4G30470	AT4G30470	AT4G30470	1.50061	0.00369173	Up
AT5G15260	AT5G15260	AT5G15260	1.5001	9.43e-05	Up
AT4G13110	AT4G13110	AT4G13110	1.49764	0.00853319	Up
AT4G35070	AT4G35070	AT4G35070	1.49637	0.0205489	Up
AT2G36630	AT2G36630	AT2G36630	1.49605	0.000279425	Up
AT1G48320	DHNAT1	AT1G48320	1.496	0.00706366	Up
AT2G39710	AT2G39710	AT2G39710	1.49174	0.0283713	Up
AT5G37740	AT5G37740	AT5G37740	1.49007	0.00309342	Up
AT5G10410	AT5G10410	AT5G10410	1.48891	0.0395531	Up
AT5G50100	AT5G50100	AT5G50100	1.48784	4.71e-05	Up
AT5G48020	AT5G48020	AT5G48020	1.4878	4.97e-13	Up
AT5G41860	AT5G41860	AT5G41860	1.4849	0.00985618	Up
AT2G31390	AT2G31390	AT2G31390	1.484	3.95e-07	Up
AT3G08990	AT3G08990	AT3G08990	1.48382	1.75e-05	Up
AT2G41210	PIP5K5	AT2G41210	1.48298	0.00479798	Up
AT5G13870	XTH5	AT5G13870	1.48281	0.00782557	Up
AT3G60180	AT3G60180	AT3G60180	1.48258	0.00605595	Up
AT3G47820	PUB39	AT3G47820	1.47927	0.0265823	Up
AT1G51660	MKK4	AT1G51660	1.47925	0.00455439	Up
AT3G26440	AT3G26440	AT3G26440	1.47876	0.0332536	Up
AT2G40880	CYSA	AT2G40880	1.47861	5.66e-08	Up
AT1G75170	AT1G75170	AT1G75170	1.47684	0.00439375	Up
AT5G45100	BRG1	AT5G45100	1.47636	0.000392447	Up
AT5G50330	AT5G50330	AT5G50330	1.47554	0.000181761	Up
AT1G17830	AT1G17830	AT1G17830	1.47487	0.0180135	Up
AT2G44080	ARL	AT2G44080	1.47394	0.0299608	Up
AT3G51895	SULTR3;1	AT3G51895	1.47348	0.00121393	Up
AT1G75400	AT1G75400	AT1G75400	1.47257	5.2e-05	Up
AT3G01650	RGLG1	AT3G01650	1.47246	0.0350979	Up
AT1G76390	PUB43	AT1G76390	1.47209	0.0019501	Up
AT1G55280	AT1G55280	AT1G55280	1.46914	0.00448812	Up
AT4G35500	AT4G35500	AT4G35500	1.46889	0.00265736	Up
AT2G19450	TAG1	AT2G19450	1.46768	0.0306704	Up
AT2G29070	AT2G29070	AT2G29070	1.46695	0.0119212	Up
AT1G68820	AT1G68820	AT1G68820	1.46611	0.00412219	Up
AT2G31090	AT2G31090	AT2G31090	1.46573	1.47e-06	Up
AT5G55860	AT5G55860	AT5G55860	1.46406	0.0009628	Up
AT3G60110	AT3G60110	AT3G60110	1.46405	0.00571589	Up
AT3G62260	AT3G62260	AT3G62260	1.46336	0.0402292	Up
AT3G45600	TET3	AT3G45600	1.46052	0.0118502	Up
AT1G08315	AT1G08315	AT1G08315	1.45974	0.00247943	Up
AT1G62660	AT1G62660	AT1G62660	1.45943	3.64e-05	Up
AT3G47360	HSD3	AT3G47360	1.45844	0.00182679	Up
AT1G01725	AT1G01725	AT1G01725	1.45812	0.00631444	Up
AT3G04000	AT3G04000	AT3G04000	1.45763	0.0057819	Up
AT3G16990	AT3G16990	AT3G16990	1.45569	0.00982965	Up
AT5G04080	AT5G04080	AT5G04080	1.45485	0.00011325	Up
AT1G71340	GDPD4	AT1G71340	1.45422	5.29e-05	Up
AT1G01490	AT1G01490	AT1G01490	1.45375	1.61e-05	Up
AT5G60440	AGL62	AT5G60440	1.45164	0.00718881	Up
AT5G57060	AT5G57060	AT5G57060	1.44873	5.72e-05	Up
AT3G54363	AT3G54363	AT3G54363	1.44798	0.000283148	Up
AT2G16595	AT2G16595	AT2G16595	1.44684	0.000205632	Up
AT1G56700	AT1G56700	AT1G56700	1.44518	0.0075291	Up
AT5G17860	CAX7	AT5G17860	1.44403	0.0321893	Up
AT4G36648	AT4G36648	AT4G36648	1.4439	0.00910562	Up
AT1G65000	AT1G65000	AT1G65000	1.44303	0.00023921	Up
AT1G15230	AT1G15230	AT1G15230	1.43938	0.0138733	Up
AT3G11660	NHL1	AT3G11660	1.43897	0.048873	Up
AT1G12400	AT1G12400	AT1G12400	1.43854	7.41e-06	Up
AT2G02040	PTR2	AT2G02040	1.4374	1.95e-06	Up
AT1G31460	AT1G31460	AT1G31460	1.43729	0.000693622	Up
AT5G07920	DGK1	AT5G07920	1.43719	0.000108566	Up
AT2G21060	GRP2B	AT2G21060	1.43657	0.0114986	Up
AT4G10330	AT4G10330	AT4G10330	1.4365	7.36e-09	Up
AT3G26100	AT3G26100	AT3G26100	1.43609	6.89e-05	Up
AT4G39090	RD19	AT4G39090	1.43555	0.0037512	Up
AT4G39780	AT4G39780	AT4G39780	1.43487	0.0145113	Up
AT5G54870	AT5G54870	AT5G54870	1.43474	0.000241099	Up
AT5G41560	AT5G41560	AT5G41560	1.43054	5.56e-06	Up
AT5G65870	PSK5	AT5G65870	1.42901	0.0394201	Up
AT3G14130	HAOX1	AT3G14130	1.42704	0.00425854	Up
AT1G62045	AT1G62045	AT1G62045	1.4261	0.0198557	Up
AT3G06810	IBR3	AT3G06810	1.42607	0.000200866	Up
AT5G49665	AT5G49665	AT5G49665	1.42575	0.0143519	Up
AT5G17450	HIPP21	AT5G17450	1.42554	0.00689609	Up
AT1G62040	ATG8C	AT1G62040	1.42549	2.11e-07	Up
AT3G43440	JAZ11	AT3G43440	1.42529	9.09e-05	Up
AT1G51340	AT1G51340	AT1G51340	1.42525	0.00113201	Up
AT1G71100	RSW10	AT1G71100	1.42424	0.00739562	Up
AT3G51960	BZIP24	AT3G51960	1.42396	0.00174559	Up
AT3G10250	AT3G10250	AT3G10250	1.42351	0.00064602	Up
AT5G52510	SCL8	AT5G52510	1.42236	1.64e-07	Up
AT5G20165	AT5G20165	AT5G20165	1.42031	8.66e-07	Up
AT2G23090	AT2G23090	AT2G23090	1.42	1.12e-10	Up
AT5G59732	AT5G59732	AT5G59732	1.41873	0.00530669	Up
AT1G08250	ADT6	AT1G08250	1.41849	0.0121034	Up
AT4G12040	SAP7	AT4G12040	1.41503	9.4e-07	Up
AT1G10500	CPISCA	AT1G10500	1.41489	1.16e-05	Up
AT1G20630	CAT1	AT1G20630	1.41462	0.00712782	Up
AT2G27490	ATCOAE	AT2G27490	1.41407	7.76e-06	Up
AT4G17350	AT4G17350	AT4G17350	1.41381	0.0138644	Up
AT2G41082	AT2G41082	AT2G41082	1.41376	0.0203569	Up
AT3G15770	AT3G15770	AT3G15770	1.4135	0.00288938	Up
AT5G42850	AT5G42850	AT5G42850	1.41337	6.55e-06	Up
AT4G17530	RAB1C	AT4G17530	1.41297	8.04e-11	Up
AT5G49450	bZIP1	AT5G49450	1.41228	0.0300895	Up
AT4G33100	AT4G33100	AT4G33100	1.41131	0.000195321	Up
AT2G04430	NUDT5	AT2G04430	1.41121	0.0159586	Up
AT3G22530	AT3G22530	AT3G22530	1.40797	3.39e-09	Up
AT3G53720	CHX20	AT3G53720	1.40713	0.0226949	Up
AT3G11745	AT3G11745	AT3G11745	1.4064	0.00123039	Up
AT1G21410	SKP2A	AT1G21410	1.40218	0.00223885	Up
AT1G69252	AT1G69252	AT1G69252	1.4017	0.00239989	Up
AT5G54780	AT5G54780	AT5G54780	1.4013	0.00171724	Up
AT2G30480	AT2G30480	AT2G30480	1.40093	0.0443941	Up
AT1G70518	AT1G70518	AT1G70518	1.39923	6.17e-05	Up
AT4G12000	AT4G12000	AT4G12000	1.39835	0.00136031	Up
AT4G14950	KMS1	AT4G14950	1.39816	2.49e-06	Up
AT4G17550	G3Pp4	AT4G17550	1.39432	0.000327879	Up
AT3G10525	LGO	AT3G10525	1.39431	0.017098	Up
AT4G38960	BBX19	AT4G38960	1.39262	1.82e-06	Up
AT4G26055	AT4G26055	AT4G26055	1.39214	0.0182125	Up
AT5G11950	LOG8	AT5G11950	1.39115	4.33e-06	Up
AT4G36640	AT4G36640	AT4G36640	1.39115	0.000193574	Up
AT5G51640	YLS7	AT5G51640	1.39044	1.97e-05	Up
AT1G30260	AT1G30260	AT1G30260	1.38658	0.0375883	Up
AT1G15740	AT1G15740	AT1G15740	1.38483	0.0191253	Up
AT3G06780	AT3G06780	AT3G06780	1.38471	0.00226591	Up
AT5G13190	GILP	AT5G13190	1.38391	0.0319279	Up
AT1G10410	AT1G10410	AT1G10410	1.38246	0.00704102	Up
AT4G28060	AT4G28060	AT4G28060	1.38136	1.52e-06	Up
AT5G15025	AT5G15025	AT5G15025	1.38065	2.14e-05	Up
AT1G04280	AT1G04280	AT1G04280	1.37951	0.0130948	Up
AT4G25670	AT4G25670	AT4G25670	1.37736	0.00166645	Up
AT5G02600	NAKR1	AT5G02600	1.37701	0.0030577	Up
AT1G16500	AT1G16500	AT1G16500	1.37693	0.0220972	Up
AT1G16040	AT1G16040	AT1G16040	1.37522	6.61e-07	Up
AT3G17770	AT3G17770	AT3G17770	1.37485	0.00364873	Up
AT5G47140	GATA27	AT5G47140	1.37433	0.00392053	Up
AT1G80300	NTT1	AT1G80300	1.37197	4.23e-06	Up
AT2G19830	SNF7.2	AT2G19830	1.37174	5.56e-07	Up
AT4G25690	AT4G25690	AT4G25690	1.37122	0.000262122	Up
AT5G14420	RGLG2	AT5G14420	1.36969	0.00157477	Up
AT5G54140	ILL3	AT5G54140	1.36898	0.0126081	Up
AT4G38495	AT4G38495	AT4G38495	1.36836	2.48e-05	Up
AT1G02380	AT1G02380	AT1G02380	1.36809	0.0383909	Up
AT5G37055	SEF	AT5G37055	1.36807	1.86e-05	Up
AT5G54940	AT5G54940	AT5G54940	1.36729	0.0148279	Up
AT1G04970	AT1G04970	AT1G04970	1.36702	6.18e-05	Up
AT3G23280	XBAT35	AT3G23280	1.36693	0.000336657	Up
AT4G27020	AT4G27020	AT4G27020	1.36654	8.95e-05	Up
AT5G47430	AT5G47430	AT5G47430	1.36559	2.82e-05	Up
AT5G23230	NIC2	AT5G23230	1.36558	0.0208671	Up
AT4G33780	AT4G33780	AT4G33780	1.36148	8.85e-05	Up
AT3G27020	YSL6	AT3G27020	1.36133	3.42e-05	Up
AT5G52450	AT5G52450	AT5G52450	1.36126	0.0254165	Up
AT1G12810	AT1G12810	AT1G12810	1.36055	1.74e-05	Up
AT5G20650	COPT5	AT5G20650	1.36022	3.45e-10	Up
AT1G15400	AT1G15400	AT1G15400	1.36001	3.51e-05	Up
AT1G49405	AT1G49405	AT1G49405	1.35947	0.034616	Up
AT3G43430	AT3G43430	AT3G43430	1.35899	0.0268973	Up
AT5G01910	AT5G01910	AT5G01910	1.35781	0.0423971	Up
AT2G22560	NET2D	AT2G22560	1.35696	0.00521391	Up
AT3G12030	AT3G12030	AT3G12030	1.35631	2.66e-08	Up
AT1G60140	TPS10 AT1G60140	AT1G60140	1.35337	0.000697577	Up
AT1G77710	CCP2	AT1G77710	1.35186	2.09e-05	Up
AT5G25940	AT5G25940	AT5G25940	1.3517	4.68e-10	Up
AT5G49645	AT5G49645	AT5G49645	1.35166	0.00427913	Up
AT1G27980	DPL1	AT1G27980	1.35165	0.014128	Up
AT4G19860	AT4G19860	AT4G19860	1.35066	0.0077317	Up
AT5G29000	PHL1	AT5G29000	1.35065	0.0013503	Up
AT5G33290	XGD1	AT5G33290	1.35009	0.038031	Up
AT1G28960	NUDX15	AT1G28960	1.34977	6.79e-06	Up
AT5G10740	AT5G10740	AT5G10740	1.34877	0.0106328	Up
AT2G39250	SNZ	AT2G39250	1.34786	0.0369776	Up
AT5G22860	AT5G22860	AT5G22860	1.34765	0.0123095	Up
AT5G24870	AT5G24870	AT5G24870	1.3462	0.00303733	Up
AT5G03380	AT5G03380	AT5G03380	1.34565	0.0295276	Up
AT5G39590	AT5G39590	AT5G39590	1.34397	0.000136537	Up
AT5G62680	GTR2	AT5G62680	1.34348	0.00679514	Up
AT2G18240	AT2G18240	AT2G18240	1.34093	0.000471639	Up
AT2G22425	AT2G22425	AT2G22425	1.34069	0.000150817	Up
AT1G63840	AT1G63840	AT1G63840	1.34041	0.0399437	Up
AT5G45010	DSS1(V)	AT5G45010	1.33867	4.3e-07	Up
AT4G38730	AT4G38730	AT4G38730	1.33736	0.00104534	Up
AT1G16840	AT1G16840	AT1G16840	1.33674	8.45e-05	Up
AT1G14340	AT1G14340	AT1G14340	1.33612	0.00542299	Up
AT2G41000	AT2G41000	AT2G41000	1.33609	1.5e-05	Up
AT2G17290	CPK6	AT2G17290	1.33552	0.0261514	Up
AT1G72120	AT1G72120	AT1G72120	1.33534	0.0343788	Up
AT1G28540	AT1G28540	AT1G28540	1.33494	1.25e-05	Up
AT3G17950	AT3G17950	AT3G17950	1.3344	0.00104785	Up
AT3G09490	AT3G09490	AT3G09490	1.33327	0.0348511	Up
AT2G45315	AT2G45315	AT2G45315	1.3331	0.000974072	Up
AT1G69270	RPK1	AT1G69270	1.33291	0.0273719	Up
AT3G19680	AT3G19680	AT3G19680	1.33238	0.00637324	Up
AT2G27990	BLH8	AT2G27990	1.32626	0.0267169	Up
AT4G16210	ECHIA	AT4G16210	1.32618	3.76e-05	Up
AT1G19660	AT1G19660	AT1G19660	1.32386	0.0393097	Up
AT3G13450	DIN4	AT3G13450	1.32361	0.0231551	Up
AT3G46000	ADF2	AT3G46000	1.32324	6.33e-05	Up
AT5G25130	CYP71B12	AT5G25130	1.3231	0.0486013	Up
AT2G39435	TRM18	AT2G39435	1.32299	0.000113951	Up
AT4G21160	ZAC	AT4G21160	1.32287	7.34e-13	Up
AT4G10810	AT4G10810	AT4G10810	1.32272	2.52e-14	Up
AT3G19260	LOH2	AT3G19260	1.3223	0.00252623	Up
AT1G49660	CXE5	AT1G49660	1.3214	0.00177904	Up
AT1G54710	ATG18H	AT1G54710	1.32098	0.000326459	Up
AT2G23450	AT2G23450	AT2G23450	1.32089	0.0311529	Up
AT1G12060	BAG5	AT1G12060	1.32037	0.00701653	Up
AT2G17705	AT2G17705	AT2G17705	1.32017	0.00413508	Up
AT4G08230	AT4G08230	AT4G08230	1.31897	0.00609357	Up
AT3G47965	AT3G47965	AT3G47965	1.31832	0.000786297	Up
AT2G14115	AT2G14115	AT2G14115	1.31766	0.000268027	Up
AT5G57000	AT5G57000	AT5G57000	1.3173	0.000131691	Up
AT4G34990	MYB32	AT4G34990	1.31697	0.00234013	Up
AT3G10640	VPS60.1	AT3G10640	1.31552	0.00107126	Up
AT1G04960	AT1G04960	AT1G04960	1.31513	0.000158497	Up
AT1G50630	AT1G50630	AT1G50630	1.31468	0.000319932	Up
AT4G12300	CYP706A4	AT4G12300	1.3142	0.00219548	Up
AT5G23750	AT5G23750	AT5G23750	1.31367	0.00671047	Up
AT5G16910	CSLD2	AT5G16910	1.31364	0.00734758	Up
AT5G18610	AT5G18610	AT5G18610	1.31265	0.0206084	Up
AT5G66360	DIM1B	AT5G66360	1.31235	2.37e-06	Up
AT4G15953	AT4G15953	AT4G15953	1.31117	0.0150882	Up
AT1G55152	AT1G55152	AT1G55152	1.3111	0.00951521	Up
AT3G62920	AT3G62920	AT3G62920	1.30996	2.01e-06	Up
AT5G60360	ALP	AT5G60360	1.30763	0.00751839	Up
AT2G43320	AT2G43320	AT2G43320	1.30627	0.00490586	Up
AT4G33640	AT4G33640	AT4G33640	1.30582	1.82e-06	Up
AT5G35460	AT5G35460	AT5G35460	1.30571	9.12e-05	Up
AT2G41780	AT2G41780	AT2G41780	1.30541	0.0237786	Up
AT2G18170	MPK7	AT2G18170	1.30444	0.00128422	Up
AT5G66170	STR18	AT5G66170	1.30381	0.0346568	Up
AT4G01070	GT72B1	AT4G01070	1.30289	0.00427836	Up
AT3G17630	CHX19	AT3G17630	1.30141	0.0102717	Up
AT3G57550	AGK2	AT3G57550	1.30008	0.0276966	Up
AT3G42150	AT3G42150	AT3G42150	1.29988	8.93e-15	Up
AT1G27760	SAT32	AT1G27760	1.29957	0.0012289	Up
AT5G42050	AT5G42050	AT5G42050	1.29918	0.0362492	Up
AT2G42790	CSY3	AT2G42790	1.29858	0.00556246	Up
AT1G35430	AT1G35430	AT1G35430	1.29802	0.00898873	Up
AT4G01710	CRK AT4G01710	AT4G01710	1.2972	1.02e-05	Up
AT3G47530	AT3G47530	AT3G47530	1.29597	0.00541871	Up
AT3G49800	AT3G49800	AT3G49800	1.29519	7.17e-05	Up
AT4G31510	AT4G31510	AT4G31510	1.29435	0.0141561	Up
AT3G04230	AT3G04230	AT3G04230	1.29422	0.000149595	Up
AT1G62305	AT1G62305	AT1G62305	1.29393	0.0334158	Up
AT2G28720	AT2G28720	AT2G28720	1.29351	0.0354309	Up
AT5G17650	AT5G17650	AT5G17650	1.29314	0.043531	Up
AT4G23885	AT4G23885	AT4G23885	1.29242	0.0260008	Up
AT5G54640	RAT5	AT5G54640	1.29149	0.00813347	Up
AT5G02560	HTA12	AT5G02560	1.29086	0.00597513	Up
AT4G09460	MYB6	AT4G09460	1.28908	1.8e-05	Up
AT4G15260	AT4G15260	AT4G15260	1.28875	0.0360155	Up
AT1G12780	UGE1	AT1G12780	1.28712	0.00974263	Up
AT5G27150	NHX1	AT5G27150	1.28688	0.000127955	Up
AT1G11910	APA1	AT1G11910	1.28604	4.08e-05	Up
AT4G20300	AT4G20300	AT4G20300	1.28449	1.12e-08	Up
AT5G52200	I-2	AT5G52200	1.2832	2.5e-06	Up
AT3G24730	AT3G24730	AT3G24730	1.28259	1.82e-06	Up
AT3G57390	AGL18	AT3G57390	1.28242	0.00117082	Up
AT2G39050	EULS3	AT2G39050	1.28232	0.0140308	Up
AT3G62810	AT3G62810	AT3G62810	1.2818	3.67e-08	Up
AT5G21020	AT5G21020	AT5G21020	1.27967	0.0142095	Up
AT5G09920	NRPB4	AT5G09920	1.27943	2.4e-07	Up
AT5G41910	MED10A	AT5G41910	1.27865	4.89e-09	Up
AT2G14110	AT2G14110	AT2G14110	1.27776	0.000310176	Up
AT3G51130	AT3G51130	AT3G51130	1.27691	0.00325268	Up
AT4G24990	ATGP4	AT4G24990	1.27687	3.37e-05	Up
AT1G62810	CuAO1	AT1G62810	1.27516	0.0426362	Up
AT3G51500	AT3G51500	AT3G51500	1.27398	0.000191056	Up
AT4G27780	ACBP2	AT4G27780	1.27235	0.00174795	Up
AT3G26580	AT3G26580	AT3G26580	1.27163	0.00365585	Up
AT3G26395	AT3G26395	AT3G26395	1.26753	3.54e-05	Up
AT1G07570	APK1A	AT1G07570	1.2674	0.0142165	Up
AT1G77540	AT1G77540	AT1G77540	1.26645	1.06e-06	Up
AT3G01430	AT3G01430	AT3G01430	1.2663	0.0102717	Up
AT4G31860	AT4G31860	AT4G31860	1.26593	0.00659361	Up
AT1G24800	AT1G24800	AT1G24800	1.2658	0.000374607	Up
AT5G59890	ADF4	AT5G59890	1.26518	0.00196345	Up
AT2G33585	AT2G33585	AT2G33585	1.26325	0.000907273	Up
AT5G05380	PRA1.B3	AT5G05380	1.26268	0.0031138	Up
AT1G26558	AT1G26558	AT1G26558	1.2596	0.0241323	Up
AT3G56260	AT3G56260	AT3G56260	1.25931	0.0248146	Up
AT1G04780	AT1G04780	AT1G04780	1.25855	0.000347634	Up
AT2G44280	AT2G44280	AT2G44280	1.25696	0.0274562	Up
AT4G09490	AT4G09490	AT4G09490	1.25646	0.000578924	Up
AT1G67940	ABCI17	AT1G67940	1.25624	0.0151035	Up
AT1G17340	AT1G17340	AT1G17340	1.25557	0.0159719	Up
AT1G08510	FATB	AT1G08510	1.25495	3.07e-05	Up
AT3G61430	PIP1A	AT3G61430	1.25353	0.015735	Up
AT4G25030	AT4G25030	AT4G25030	1.2524	0.0011101	Up
AT1G09995	AT1G09995	AT1G09995	1.252	6.08e-07	Up
AT2G26830	emb1187	AT2G26830	1.2508	3.35e-09	Up
AT1G27200	AT1G27200	AT1G27200	1.25065	0.00483883	Up
AT3G17626	AT3G17626	AT3G17626	1.24906	0.00013271	Up
AT5G60430	AT5G60430	AT5G60430	1.24828	0.0442509	Up
AT1G48490	AT1G48490	AT1G48490	1.24756	0.00011024	Up
AT4G26160	ACHT1	AT4G26160	1.24708	0.00136442	Up
AT1G10720	AT1G10720	AT1G10720	1.24697	1.03e-06	Up
AT4G21560	VPS28-1	AT4G21560	1.24684	0.000497768	Up
AT1G03080	NET1D	AT1G03080	1.24534	0.000380791	Up
AT5G18640	AT5G18640	AT5G18640	1.24529	0.00337054	Up
AT3G07260	AT3G07260	AT3G07260	1.24515	0.000283817	Up
AT4G32040	KNAT5	AT4G32040	1.24486	0.000241227	Up
AT5G44790	RAN1	AT5G44790	1.24483	4.71e-05	Up
AT1G24881	AT1G24881	AT1G24881	1.24328	0.000348771	Up
AT1G25055	AT1G25055	AT1G25055	1.24328	0.000342537	Up
AT2G17350	AT2G17350	AT2G17350	1.24174	4.61e-07	Up
AT1G32630	AT1G32630	AT1G32630	1.24135	0.001078	Up
AT1G13390	AT1G13390	AT1G13390	1.24061	0.0208671	Up
AT5G57740	XBAT32	AT5G57740	1.24025	7.25e-05	Up
AT4G14790	ATSUV3	AT4G14790	1.24001	0.00479798	Up
AT1G19310	AT1G19310	AT1G19310	1.23911	0.00694778	Up
AT5G17380	AT5G17380	AT5G17380	1.23812	0.000842707	Up
AT3G53000	PP2-A15	AT3G53000	1.23804	0.00301169	Up
AT3G23610	DSPTP1	AT3G23610	1.23771	0.000429001	Up
AT2G37150	AT2G37150	AT2G37150	1.23603	0.0342293	Up
AT3G43230	AT3G43230	AT3G43230	1.23543	0.00516217	Up
AT2G45500	AT2G45500	AT2G45500	1.23501	0.00606142	Up
AT5G47050	AT5G47050	AT5G47050	1.235	0.0211336	Up
AT3G49100	AT3G49100	AT3G49100	1.23466	2.52e-08	Up
AT5G21990	TPR7	AT5G21990	1.23452	4e-07	Up
AT3G27100	AT3G27100	AT3G27100	1.23413	1.44e-08	Up
AT1G58030	CAT2 AT1G58030	AT1G58030	1.23369	0.00670716	Up
AT3G14270	FAB1B	AT3G14270	1.23316	0.000847168	Up
AT1G05060	AT1G05060	AT1G05060	1.23252	0.00765513	Up
AT2G36830	GAMMA-TIP	AT2G36830	1.23135	0.0368434	Up
AT3G60080	AT3G60080	AT3G60080	1.23063	1.87e-07	Up
AT5G02100	UNE18	AT5G02100	1.23009	0.000309936	Up
AT2G28760	UXS6	AT2G28760	1.23005	0.0449979	Up
AT3G62650	AT3G62650	AT3G62650	1.22963	0.0295115	Up
AT3G44720	ADT4	AT3G44720	1.22936	0.010649	Up
AT5G23870	AT5G23870	AT5G23870	1.22728	0.0315781	Up
AT2G14878	AT2G14878	AT2G14878	1.22527	0.0146631	Up
AT1G64750	DSS1(I)	AT1G64750	1.22467	1.69e-09	Up
AT2G21940	SK1	AT2G21940	1.22465	6.74e-05	Up
AT3G22200	POP2	AT3G22200	1.22288	0.000563927	Up
AT3G47833	SDH7 AT3G47833	AT3G47833	1.22259	2.68e-06	Up
AT2G37970	SOUL-1	AT2G37970	1.22193	0.021363	Up
AT3G52420	OEP7	AT3G52420	1.22115	4.45e-09	Up
AT2G43310	AT2G43310	AT2G43310	1.21985	0.0052587	Up
AT5G03490	AT5G03490	AT5G03490	1.21974	0.00500069	Up
AT5G09960	AT5G09960	AT5G09960	1.21967	1.38e-06	Up
AT3G27110	AT3G27110	AT3G27110	1.2183	0.00371271	Up
AT4G16520	ATG8F	AT4G16520	1.21582	0.00452782	Up
AT4G24960	HVA22D	AT4G24960	1.21571	0.0285603	Up
AT4G32850	nPAP	AT4G32850	1.2154	2.66e-05	Up
AT1G69640	SBH1	AT1G69640	1.21498	0.000441469	Up
AT1G13950	ELF5A-1	AT1G13950	1.21481	0.0152634	Up
AT1G29330	ERD2 AT1G29330	AT1G29330	1.21429	0.014286	Up
AT5G05930	GC1 AT5G05930	AT5G05930	1.21288	0.000102508	Up
AT4G28550	AT4G28550	AT4G28550	1.21045	0.0213842	Up
AT2G25720	AT2G25720	AT2G25720	1.21034	2.28e-08	Up
AT2G32795	AT2G32795	AT2G32795	1.21017	4.43e-05	Up
AT1G23880	AT1G23880	AT1G23880	1.21014	0.0272301	Up
AT5G01720	AT5G01720	AT5G01720	1.20962	0.0422364	Up
AT5G64180	AT5G64180	AT5G64180	1.20943	0.00127524	Up
AT1G21840	UREF	AT1G21840	1.20788	0.00187031	Up
AT1G03950	VPS2.3	AT1G03950	1.20754	0.0022766	Up
AT1G13960	WRKY4	AT1G13960	1.20569	0.00165424	Up
AT3G53120	VPS37-1	AT3G53120	1.20517	0.00210078	Up
AT4G36400	D2HGDH	AT4G36400	1.20487	0.000412534	Up
AT1G05785	AT1G05785	AT1G05785	1.20435	9.03e-06	Up
AT3G47347	AT3G47347	AT3G47347	1.20342	0.0407164	Up
AT1G09913	AT1G09913	AT1G09913	1.20321	0.0484325	Up
AT3G22260	AT3G22260	AT3G22260	1.20185	4.8e-05	Up
AT5G52545	AT5G52545	AT5G52545	1.20175	0.00872609	Up
AT1G55110	IDD7	AT1G55110	1.20156	0.00433582	Up
AT1G09645	AT1G09645	AT1G09645	1.20115	9.33e-09	Up
AT4G34120	LEJ1	AT4G34120	1.20086	0.000148323	Up
AT4G12850	AT4G12850	AT4G12850	1.19985	0.0126915	Up
AT2G24540	AFR	AT2G24540	1.19957	0.00249753	Up
AT5G57080	AT5G57080	AT5G57080	1.19941	0.0477617	Up
AT3G53350	RIP3	AT3G53350	1.1994	0.000726364	Up
AT1G67880	AT1G67880	AT1G67880	1.19928	0.00420474	Up
AT1G26920	AT1G26920	AT1G26920	1.19823	0.000484729	Up
AT2G01460	AT2G01460	AT2G01460	1.1982	0.00195093	Up
AT2G37510	AT2G37510	AT2G37510	1.19757	0.0461275	Up
AT2G22640	BRK1	AT2G22640	1.19572	1.99e-09	Up
AT5G17000	AT5G17000	AT5G17000	1.19526	0.0469035	Up
AT2G46600	AT2G46600	AT2G46600	1.1944	0.0414194	Up
AT3G14610	CYP72A7	AT3G14610	1.19415	0.0462472	Up
AT5G47180	AT5G47180	AT5G47180	1.19393	0.00457452	Up
AT2G31560	AT2G31560	AT2G31560	1.1937	0.00107167	Up
AT1G64300	AT1G64300	AT1G64300	1.19227	0.0247665	Up
AT1G09687	ath-MIR4228	AT1G09687	1.19017	0.00655195	Up
AT5G09990	PROPEP5	AT5G09990	1.1896	0.0468503	Up
AT5G02880	UPL4	AT5G02880	1.18909	0.00334481	Up
AT1G04537	AT1G04537	AT1G04537	1.18888	0.00161311	Up
AT4G21740	AT4G21740	AT4G21740	1.18804	0.00178546	Up
AT1G65520	ECI1	AT1G65520	1.18711	0.0160636	Up
AT1G09560	GLP5	AT1G09560	1.18684	0.0371363	Up
AT3G08710	TH9	AT3G08710	1.18611	0.00159416	Up
AT2G17760	AT2G17760	AT2G17760	1.18495	0.00603413	Up
AT4G02005	AT4G02005	AT4G02005	1.18445	0.0373815	Up
AT1G25520	AT1G25520	AT1G25520	1.18412	0.00165549	Up
AT1G66740	SGA2	AT1G66740	1.18389	5.02e-06	Up
AT1G24350	AT1G24350	AT1G24350	1.18384	7.13e-07	Up
AT2G44360	AT2G44360	AT2G44360	1.18118	2.5e-07	Up
AT1G78420	AT1G78420	AT1G78420	1.18084	0.0141991	Up
AT5G22875	AT5G22875	AT5G22875	1.18024	1.01e-05	Up
AT5G04830	AT5G04830	AT5G04830	1.17965	0.000331082	Up
AT2G17130	IDH2	AT2G17130	1.17811	0.00102385	Up
AT3G27220	AT3G27220	AT3G27220	1.17773	0.00388384	Up
AT4G34680	GATA3	AT4G34680	1.17712	0.00995387	Up
AT2G02360	PP2-B10	AT2G02360	1.17573	0.0472555	Up
AT3G17100	AT3G17100	AT3G17100	1.17476	8.7e-05	Up
AT5G65060	MAF3	AT5G65060	1.17457	0.00125258	Up
AT2G08860	AT2G08860	AT2G08860	1.17272	0.0364835	Up
AT1G31258	AT1G31258	AT1G31258	1.17207	7.54e-05	Up
AT2G19180	AT2G19180	AT2G19180	1.17129	0.000368995	Up
AT1G22640	MYB3	AT1G22640	1.17126	0.000257516	Up
AT1G06050	AT1G06050	AT1G06050	1.17095	0.0067346	Up
AT3G05580	TOPP9	AT3G05580	1.17088	0.00110212	Up
AT4G21470	FMN/FHY	AT4G21470	1.17068	0.000647504	Up
AT1G33970	AT1G33970	AT1G33970	1.17035	0.0243875	Up
AT1G25150	AT1G25150	AT1G25150	1.16953	0.0015052	Up
AT5G05850	PIRL1	AT5G05850	1.16931	0.00222686	Up
AT5G67350	AT5G67350	AT5G67350	1.16879	0.0141991	Up
AT3G54810	BME3	AT3G54810	1.16833	0.00566747	Up
AT4G34000	ABF3	AT4G34000	1.16828	0.0390631	Up
AT3G44280	AT3G44280	AT3G44280	1.16678	1.32e-07	Up
AT1G68550	CRF10	AT1G68550	1.16582	0.031144	Up
AT5G63990	AT5G63990	AT5G63990	1.16528	0.0302662	Up
AT4G26810	AT4G26810	AT4G26810	1.16444	0.000974794	Up
AT3G05030	NHX2	AT3G05030	1.16373	0.0139659	Up
AT1G11530	CXXS1	AT1G11530	1.16369	0.000727249	Up
AT3G26612	AT3G26612	AT3G26612	1.16307	0.00138944	Up
AT1G73790	GIP2	AT1G73790	1.16296	4.92e-05	Up
AT1G32310	SAMBA	AT1G32310	1.16203	4.98e-06	Up
AT3G48990	AAE3	AT3G48990	1.16159	0.009179	Up
AT2G24260	LRL1	AT2G24260	1.16061	0.00336885	Up
AT5G63135	AT5G63135	AT5G63135	1.15878	5.43e-05	Up
AT2G39725	AT2G39725	AT2G39725	1.15826	0.00162846	Up
AT3G23160	AT3G23160	AT3G23160	1.15769	0.000138478	Up
AT5G42980	TRX3	AT5G42980	1.15713	0.0128041	Up
AT4G10040	CYTC-2	AT4G10040	1.15684	8.85e-05	Up
AT5G57815	AT5G57815	AT5G57815	1.15613	0.00541816	Up
AT1G51700	DOF1	AT1G51700	1.15593	0.0179648	Up
AT5G50840	AT5G50840	AT5G50840	1.15504	4.5e-05	Up
AT3G07020	SGT	AT3G07020	1.15342	1.1e-05	Up
AT1G77930	AT1G77930	AT1G77930	1.1532	0.00165003	Up
AT5G13810	AT5G13810	AT5G13810	1.15278	0.0002969	Up
AT1G27930	AT1G27930	AT1G27930	1.15273	0.000106032	Up
AT4G33090	APM1	AT4G33090	1.15105	5.17e-06	Up
AT1G45976	SBP1 AT1G45976	AT1G45976	1.15046	9.55e-05	Up
AT1G08770	PRA1.E	AT1G08770	1.14665	1.91e-05	Up
AT5G20190	AT5G20190	AT5G20190	1.14575	0.0261253	Up
AT4G11570	AT4G11570	AT4G11570	1.14471	0.00711158	Up
AT3G27380	SDH2-1	AT3G27380	1.14362	6.16e-08	Up
AT1G13880	AT1G13880	AT1G13880	1.14272	0.00232478	Up
AT3G05830	AT3G05830	AT3G05830	1.14045	0.0231551	Up
AT1G55675	AT1G55675	AT1G55675	1.14021	0.000931824	Up
AT5G08170	EMB1873	AT5G08170	1.14012	5.42e-05	Up
AT2G39630	AT2G39630	AT2G39630	1.13946	6.03e-08	Up
AT3G15353	MT3	AT3G15353	1.13868	0.0389035	Up
AT3G61070	PEX11E	AT3G61070	1.13791	1.87e-05	Up
AT1G64950	CYP89A5	AT1G64950	1.13751	0.00337942	Up
AT1G62820	AT1G62820	AT1G62820	1.13584	3.5e-05	Up
AT3G10860	AT3G10860	AT3G10860	1.1348	8.52e-08	Up
AT4G13615	AT4G13615	AT4G13615	1.13457	0.00214792	Up
AT1G08570	ACHT4	AT1G08570	1.13437	0.00977402	Up
AT1G64230	UBC28	AT1G64230	1.13186	6.1e-05	Up
AT5G12200	PYD2	AT5G12200	1.12979	0.00741666	Up
AT1G48140	DPMS3	AT1G48140	1.12906	7.75e-10	Up
AT5G61530	AT5G61530	AT5G61530	1.12741	0.0257345	Up
AT5G37480	AT5G37480	AT5G37480	1.12674	0.00197202	Up
AT5G01350	AT5G01350	AT5G01350	1.12658	2.81e-06	Up
ATMG01170	atp6-2	ATMG01170	1.12617	0.0390631	Up
AT1G52550	AT1G52550	AT1G52550	1.1257	0.010089	Up
AT5G49710	AT5G49710	AT5G49710	1.12547	0.00293003	Up
AT1G55475	AT1G55475	AT1G55475	1.12509	0.00165011	Up
AT4G36630	EMB2754	AT4G36630	1.12385	0.0172423	Up
AT1G02680	TAF13	AT1G02680	1.1228	6.89e-06	Up
AT5G28830	AT5G28830	AT5G28830	1.12187	0.0372232	Up
AT4G04800	MSRB3	AT4G04800	1.12025	0.00476536	Up
AT2G44970	AT2G44970	AT2G44970	1.11973	7.66e-05	Up
AT1G72510	AT1G72510	AT1G72510	1.11774	0.0303085	Up
AT4G37310	CYP81H1	AT4G37310	1.11767	0.01969	Up
AT2G43080	AT-P4H-1	AT2G43080	1.11739	0.00036409	Up
AT5G42890	SCP2	AT5G42890	1.11703	0.000602917	Up
AT4G01480	PPa5	AT4G01480	1.11532	0.0254769	Up
AT2G24100	ASG1 AT2G24100	AT2G24100	1.11499	0.00204268	Up
AT1G34630	AT1G34630	AT1G34630	1.11469	0.00979254	Up
AT1G78380	GSTU19	AT1G78380	1.11278	0.0208891	Up
AT1G22885	AT1G22885	AT1G22885	1.1123	0.0103371	Up
AT3G06125	AT3G06125	AT3G06125	1.11204	0.00840259	Up
AT5G37680	ARLA1A	AT5G37680	1.1118	6.01e-07	Up
AT1G60870	MEE9	AT1G60870	1.11174	0.0248637	Up
AT4G39860	AT4G39860	AT4G39860	1.11066	0.0254082	Up
AT3G55050	AT3G55050	AT3G55050	1.11066	0.00238412	Up
AT1G01770	AT1G01770	AT1G01770	1.11043	0.0343859	Up
AT5G62130	AT5G62130	AT5G62130	1.11032	0.0145984	Up
AT1G09180	SARA1A	AT1G09180	1.11016	0.0138906	Up
AT2G22690	AT2G22690	AT2G22690	1.11002	0.0063545	Up
AT3G27190	UKL2	AT3G27190	1.10956	0.0141561	Up
AT1G71130	CRF8	AT1G71130	1.10911	0.0175815	Up
AT1G03330	LSM2	AT1G03330	1.10863	1.61e-11	Up
AT1G16890	UBC36	AT1G16890	1.10849	5.3e-05	Up
AT5G24500	AT5G24500	AT5G24500	1.10837	2.92e-06	Up
AT3G23210	bHLH34	AT3G23210	1.10834	0.000690822	Up
AT3G03320	AT3G03320	AT3G03320	1.10606	0.0265758	Up
AT1G04555	AT1G04555	AT1G04555	1.10586	0.0113628	Up
AT1G68680	AT1G68680	AT1G68680	1.10432	5.31e-09	Up
AT3G19980	FYPP3	AT3G19980	1.1042	2.04e-05	Up
AT4G13160	AT4G13160	AT4G13160	1.1037	0.000131205	Up
AT5G43900	MYA2	AT5G43900	1.1035	0.000121563	Up
AT5G56190	AT5G56190	AT5G56190	1.10339	0.00140657	Up
AT2G44310	AT2G44310	AT2G44310	1.10338	2.89e-06	Up
AT5G64560	MGT9	AT5G64560	1.10276	0.000492155	Up
AT3G28956	AT3G28956	AT3G28956	1.10193	0.000705869	Up
AT5G05710	AT5G05710	AT5G05710	1.1017	0.00177331	Up
AT3G18295	AT3G18295	AT3G18295	1.10073	0.000452487	Up
AT1G23330	AT1G23330	AT1G23330	1.10067	0.0027937	Up
AT4G33690	AT4G33690	AT4G33690	1.09984	0.00283862	Up
AT5G57655	AT5G57655	AT5G57655	1.09828	0.0240305	Up
AT1G71940	AT1G71940	AT1G71940	1.09778	2.88e-05	Up
AT3G01040	GAUT13	AT3G01040	1.09755	3.74e-05	Up
AT2G03800	GEK1	AT2G03800	1.09743	2.01e-05	Up
AT1G77370	AT1G77370	AT1G77370	1.09734	0.00280005	Up
AT3G61220	SDR1	AT3G61220	1.09703	0.00358644	Up
AT4G04925	AT4G04925	AT4G04925	1.09684	0.00133278	Up
AT2G21185	AT2G21185	AT2G21185	1.09476	0.0363097	Up
AT1G51950	IAA18	AT1G51950	1.09447	0.000234902	Up
AT5G41350	AT5G41350	AT5G41350	1.09384	0.00105054	Up
AT3G53420	PIP2A	AT3G53420	1.09347	0.0449326	Up
AT3G51000	AT3G51000	AT3G51000	1.09335	0.0105237	Up
AT5G06750	AT5G06750	AT5G06750	1.09289	0.0406973	Up
AT2G45695	AT2G45695	AT2G45695	1.09271	0.000479013	Up
AT4G21580	AT4G21580	AT4G21580	1.09224	0.00473249	Up
AT5G28442	AT5G28442	AT5G28442	1.09212	0.028801	Up
AT2G29700	PH1	AT2G29700	1.09206	8.14e-07	Up
AT5G65240	AT5G65240	AT5G65240	1.09109	0.00902742	Up
AT2G05260	AT2G05260	AT2G05260	1.09085	0.0160064	Up
AT2G21320	BBX18	AT2G21320	1.09017	0.0194758	Up
AT1G66410	CAM4	AT1G66410	1.09015	0.000221049	Up
AT4G00860	ATOZI1	AT4G00860	1.08981	4.41e-06	Up
AT3G53930	AT3G53930	AT3G53930	1.08819	0.00572695	Up
AT5G09830	AT5G09830	AT5G09830	1.08729	6.79e-06	Up
AT2G46100	AT2G46100	AT2G46100	1.08701	0.037709	Up
AT5G12390	FIS1B	AT5G12390	1.087	0.00380795	Up
AT2G33590	CRL1	AT2G33590	1.0868	0.0331245	Up
AT1G47750	PEX11A	AT1G47750	1.08672	0.00018326	Up
AT2G06005	FIP1 AT2G06005	AT2G06005	1.08611	0.00749374	Up
AT4G20330	AT4G20330	AT4G20330	1.0861	4.48e-09	Up
AT3G52535	AT3G52535	AT3G52535	1.08432	5.9e-06	Up
AT3G18430	AT3G18430	AT3G18430	1.08404	1.28e-07	Up
AT4G30010	AT4G30010	AT4G30010	1.08295	1.49e-07	Up
AT3G11780	AT3G11780	AT3G11780	1.08286	0.00184153	Up
AT3G25585	AAPT2	AT3G25585	1.08284	3.21e-05	Up
AT1G48040	AT1G48040	AT1G48040	1.08272	0.00503492	Up
AT5G16950	AT5G16950	AT5G16950	1.08266	2.45e-05	Up
AT1G02740	AT1G02740	AT1G02740	1.08202	0.0176981	Up
AT3G27350	AT3G27350	AT3G27350	1.082	5.4e-05	Up
AT2G44420	AT2G44420	AT2G44420	1.0811	0.000158053	Up
AT2G28510	AT2G28510	AT2G28510	1.0808	0.00581219	Up
AT3G57090	BIGYIN	AT3G57090	1.07892	6.59e-05	Up
AT2G15570	ATHM3	AT2G15570	1.07658	0.00188307	Up
AT3G03610	AT3G03610	AT3G03610	1.07594	0.00320476	Up
AT5G43403	AT5G43403	AT5G43403	1.07591	0.00175639	Up
AT2G45720	AT2G45720	AT2G45720	1.07546	0.00839018	Up
AT5G01820	SR1 AT5G01820	AT5G01820	1.07488	0.0413675	Up
AT1G25211	AT1G25211	AT1G25211	1.07395	0.0181188	Up
AT5G53330	AT5G53330	AT5G53330	1.07265	0.00110469	Up
AT2G16530	AT2G16530	AT2G16530	1.07181	0.0488793	Up
AT3G05545	AT3G05545	AT3G05545	1.07066	4.86e-06	Up
AT3G61560	AT3G61560	AT3G61560	1.06834	5.54e-05	Up
AT5G53650	AT5G53650	AT5G53650	1.06798	9.04e-08	Up
AT1G12390	AT1G12390	AT1G12390	1.06673	1.75e-08	Up
AT3G05932	AT3G05932	AT3G05932	1.06637	0.00180259	Up
AT5G19030	AT5G19030	AT5G19030	1.06634	0.00105729	Up
AT4G17720	AT4G17720	AT4G17720	1.06629	0.00261895	Up
AT1G66670	CLPP3	AT1G66670	1.06565	2.08e-05	Up
AT5G51620	AT5G51620	AT5G51620	1.06494	0.000907273	Up
AT3G27890	NQR AT3G27890	AT3G27890	1.06418	0.00857926	Up
AT5G27280	AT5G27280	AT5G27280	1.06209	0.0408989	Up
AT2G45630	AT2G45630	AT2G45630	1.06177	0.000212571	Up
AT3G11420	AT3G11420	AT3G11420	1.06128	0.034529	Up
AT5G43730	AT5G43730	AT5G43730	1.06039	0.0196327	Up
AT5G07070	CIPK2	AT5G07070	1.06025	0.0193979	Up
AT4G16670	AT4G16670	AT4G16670	1.05997	0.00974873	Up
AT4G17840	AT4G17840	AT4G17840	1.05956	0.018756	Up
AT3G11200	AL2	AT3G11200	1.05949	8.43e-14	Up
AT5G58380	SIP1 AT5G58380	AT5G58380	1.05933	0.00838559	Up
AT4G34310	AT4G34310	AT4G34310	1.05922	0.00399473	Up
AT4G24220	VEP1	AT4G24220	1.05868	0.00314661	Up
AT2G26210	AT2G26210	AT2G26210	1.05823	0.000339025	Up
AT4G38932	AT4G38932	AT4G38932	1.05623	0.0174726	Up
AT4G36790	AT4G36790	AT4G36790	1.05613	0.00123412	Up
AT1G67060	AT1G67060	AT1G67060	1.05606	0.00606099	Up
AT5G03455	CDC25	AT5G03455	1.05564	0.00212057	Up
AT2G39270	AT2G39270	AT2G39270	1.05095	0.0079665	Up
AT3G51880	HMGB1	AT3G51880	1.05017	0.000280543	Up
AT1G51550	AT1G51550	AT1G51550	1.04986	0.00944356	Up
AT5G25900	GA3	AT5G25900	1.04951	0.00972846	Up
AT1G09920	AT1G09920	AT1G09920	1.0495	0.000253659	Up
AT4G15955	AT4G15955	AT4G15955	1.04862	0.000943365	Up
AT5G17580	AT5G17580	AT5G17580	1.04787	0.0186338	Up
AT3G24100	AT3G24100	AT3G24100	1.04678	0.000989163	Up
AT3G59690	IQD13	AT3G59690	1.04647	0.0366504	Up
AT3G26920	AT3G26920	AT3G26920	1.04433	0.00450911	Up
AT3G26670	AT3G26670	AT3G26670	1.04426	0.000254983	Up
AT5G50430	UBC33	AT5G50430	1.04399	0.00712278	Up
AT5G25540	CID6	AT5G25540	1.04373	0.00105199	Up
AT2G01735	RIE1	AT2G01735	1.0434	0.000116682	Up
AT4G13520	SMAP1	AT4G13520	1.04291	0.00320562	Up
AT1G54260	AT1G54260	AT1G54260	1.04288	0.000325845	Up
AT2G35733	AT2G35733	AT2G35733	1.04191	0.0327993	Up
AT5G28300	AT5G28300	AT5G28300	1.0418	0.0173955	Up
AT2G39970	PXN	AT2G39970	1.04175	3.51e-06	Up
AT3G62190	AT3G62190	AT3G62190	1.04173	9.11e-06	Up
AT2G31200	ADF6	AT2G31200	1.04137	0.0110426	Up
AT4G40042	AT4G40042	AT4G40042	1.04121	0.003728	Up
AT2G31230	ERF15	AT2G31230	1.04119	0.0175264	Up
AT3G48690	CXE12	AT3G48690	1.04106	0.00439911	Up
AT3G50900	AT3G50900	AT3G50900	1.0381	0.0375806	Up
AT5G39250	AT5G39250	AT5G39250	1.03781	4.63e-05	Up
AT3G19950	AT3G19950	AT3G19950	1.0359	2.93e-05	Up
AT4G10280	AT4G10280	AT4G10280	1.03559	0.000297971	Up
AT4G31750	WIN2	AT4G31750	1.03556	0.00105199	Up
AT5G18850	AT5G18850	AT5G18850	1.03383	0.0310693	Up
AT5G43740	AT5G43740	AT5G43740	1.03279	0.00626717	Up
AT5G04260	WCRKC2	AT5G04260	1.03264	0.000938683	Up
AT5G09595	AT5G09595	AT5G09595	1.03249	0.0434086	Up
AT3G63080	GPX5	AT3G63080	1.03178	0.00138499	Up
AT5G06370	AT5G06370	AT5G06370	1.03168	0.000621204	Up
AT3G22630	PBD1	AT3G22630	1.03154	1.23e-10	Up
AT5G27760	AT5G27760	AT5G27760	1.03115	0.00158146	Up
AT2G30945	AT2G30945	AT2G30945	1.0311	0.0145051	Up
AT5G54110	MAMI	AT5G54110	1.0303	0.00173955	Up
AT1G47820	AT1G47820	AT1G47820	1.0295	0.0187725	Up
AT3G12650	AT3G12650	AT3G12650	1.02879	0.000236537	Up
AT4G39140	AT4G39140	AT4G39140	1.02862	0.0158652	Up
AT1G09530	PIF3	AT1G09530	1.02816	0.0352256	Up
AT4G35860	GB2	AT4G35860	1.02777	8.88e-06	Up
AT1G61780	AT1G61780	AT1G61780	1.02728	8.63e-06	Up
AT5G10860	CBSX3	AT5G10860	1.02489	0.00417032	Up
AT1G16060	ADAP	AT1G16060	1.02474	0.0338019	Up
AT1G03960	AT1G03960	AT1G03960	1.0247	0.0447316	Up
AT1G48790	AMSH1	AT1G48790	1.02422	1.09e-05	Up
AT1G29970	RPL18AA	AT1G29970	1.02392	3.79e-05	Up
AT5G61760	IPK2BETA	AT5G61760	1.02367	6.89e-05	Up
AT4G00430	PIP1;4	AT4G00430	1.02318	0.00107126	Up
AT4G10100	CNX7	AT4G10100	1.02261	0.00196499	Up
AT4G16500	AT4G16500	AT4G16500	1.02225	0.0238548	Up
AT2G34160	AT2G34160	AT2G34160	1.02225	2.55e-06	Up
AT3G30390	AT3G30390	AT3G30390	1.02138	0.00298428	Up
AT1G60430	ARPC3	AT1G60430	1.02032	0.00343106	Up
AT5G16680	AT5G16680	AT5G16680	1.01944	0.0154401	Up
AT5G21274	CAM6	AT5G21274	1.01871	6.43e-07	Up
AT1G49140	AT1G49140	AT1G49140	1.01838	6.92e-07	Up
AT2G39805	AT2G39805	AT2G39805	1.01771	4.16e-06	Up
AT1G50640	ERF3	AT1G50640	1.0172	0.00131015	Up
AT3G46440	UXS5	AT3G46440	1.01719	0.00616914	Up
AT2G32240	AT2G32240	AT2G32240	1.01696	0.0118879	Up
AT1G75950	SKP1	AT1G75950	1.0169	8.03e-12	Up
AT3G28950	AT3G28950	AT3G28950	1.0169	0.033539	Up
AT4G19950	AT4G19950	AT4G19950	1.01618	0.0175605	Up
AT4G12610	RAP74	AT4G12610	1.01557	0.0218301	Up
AT4G11220	BTI2	AT4G11220	1.01421	0.000559945	Up
AT4G01897	AT4G01897	AT4G01897	1.01325	0.027293	Up
AT1G76560	CP12-3	AT1G76560	1.01315	0.0375806	Up
AT4G00895	AT4G00895	AT4G00895	1.0124	5.91e-05	Up
AT2G20920	AT2G20920	AT2G20920	1.01214	0.00158161	Up
AT2G43640	AT2G43640	AT2G43640	1.01118	0.000632297	Up
AT1G28280	AT1G28280	AT1G28280	1.01064	0.046862	Up
AT2G38710	AT2G38710	AT2G38710	1.01054	0.000428388	Up
AT4G36220	FAH1 AT4G36220	AT4G36220	1.01051	0.0155139	Up
AT1G44820	AT1G44820	AT1G44820	1.0104	0.00490571	Up
AT5G26720	AT5G26720	AT5G26720	1.01033	0.001198	Up
AT2G36895	AT2G36895	AT2G36895	1.00965	0.04137	Up
AT3G58040	SINAT2	AT3G58040	1.0093	2.08e-05	Up
AT5G42300	UBL5	AT5G42300	1.00925	0.00315318	Up
AT4G15800	RALFL33	AT4G15800	1.00901	0.0121224	Up
AT5G64930	CPR5	AT5G64930	1.00853	0.00154259	Up
AT1G64850	AT1G64850	AT1G64850	1.00747	0.00804529	Up
AT2G29450	GSTU5	AT2G29450	1.00723	0.0281512	Up
ATMG00580	nad4	ATMG00580	1.00716	0.00975955	Up
AT4G30240	AT4G30240	AT4G30240	1.00703	0.00205236	Up
AT1G09794	AT1G09794	AT1G09794	1.00667	0.0115296	Up
AT4G21105	AT4G21105	AT4G21105	1.00643	0.00103136	Up
AT2G37520	AT2G37520	AT2G37520	1.00619	0.00276404	Up
AT1G64500	AT1G64500	AT1G64500	1.00616	0.00198798	Up
AT3G49725	AT3G49725	AT3G49725	1.00538	0.0194507	Up
AT1G61150	AT1G61150	AT1G61150	1.0038	3.92e-06	Up
AT1G69680	AT1G69680	AT1G69680	1.00336	0.0316629	Up
AT1G10650	AT1G10650	AT1G10650	1.00288	0.000809565	Up
AT5G66760	SDH1-1	AT5G66760	1.00268	2.54e-05	Up
AT4G26240	AT4G26240	AT4G26240	1.00149	0.00830037	Up
AT4G15240	AT4G15240	AT4G15240	1.00139	0.00219548	Up
AT1G79570	AT1G79570	AT1G79570	1.00122	1.58e-06	Up
AT3G26080	AT3G26080	AT3G26080	1.00114	0.00258217	Up
AT5G57860	AT5G57860	AT5G57860	1.001	0.000158497	Up
AT1G06360	AT1G06360	AT1G06360	-19.0934	3.82e-15	Down
AT4G22490	AT4G22490	AT4G22490	-16.8764	1.32e-06	Down
AT2G26020	PDF1.2b	AT2G26020	-8.39227	5.89e-05	Down
AT4G11320	AT4G11320	AT4G11320	-7.21291	1.79e-05	Down
AT5G44430	PDF1.2c	AT5G44430	-7.19321	0.00563892	Down
AT4G34790	AT4G34790	AT4G34790	-7.12922	0.000267582	Down
AT5G44420	PDF1.2	AT5G44420	-6.9929	0.00055005	Down
AT5G25460	DGR2	AT5G25460	-6.95351	4.84e-13	Down
AT5G15580	LNG1	AT5G15580	-6.56923	0.000197844	Down
AT2G44830	AT2G44830	AT2G44830	-6.5013	1.62e-05	Down
AT1G10657	AT1G10657	AT1G10657	-6.45056	3.35e-08	Down
AT5G20630	GER3	AT5G20630	-6.39035	0.000467828	Down
AT1G43605	AT1G43605	AT1G43605	-6.37116	0.000165479	Down
AT3G03850	SAUR26	AT3G03850	-6.23582	0.000102038	Down
AT2G27402	AT2G27402	AT2G27402	-6.22073	5.46e-08	Down
AT2G36050	OFP15	AT2G36050	-6.21424	8.2e-05	Down
AT3G62390	TBL6	AT3G62390	-6.19274	2.63e-05	Down
AT1G29440	SAUR63	AT1G29440	-6.14966	1.12e-05	Down
AT2G15090	KCS8	AT2G15090	-6.14698	0.000158497	Down
AT2G40610	EXPA8	AT2G40610	-6.13023	7.06e-06	Down
AT5G25190	ESE3	AT5G25190	-6.10274	6.2e-06	Down
AT1G78970	LUP1	AT1G78970	-6.04501	0.000464958	Down
AT4G18670	AT4G18670	AT4G18670	-6.04083	5.66e-05	Down
AT5G50335	AT5G50335	AT5G50335	-5.95937	0.000428942	Down
AT1G78450	AT1G78450	AT1G78450	-5.95739	2.41e-05	Down
AT4G19380	AT4G19380	AT4G19380	-5.81506	0.00102559	Down
AT4G24275	AT4G24275	AT4G24275	-5.74757	0.000924133	Down
AT4G09160	AT4G09160	AT4G09160	-5.74547	0.000350583	Down
AT4G31890	AT4G31890	AT4G31890	-5.73322	0.000454202	Down
AT1G29450	AT1G29450	AT1G29450	-5.72929	3.76e-05	Down
AT3G52700	AT3G52700	AT3G52700	-5.66602	0.000336167	Down
AT5G46700	TRN2	AT5G46700	-5.66012	0.000416865	Down
AT1G31710	AT1G31710	AT1G31710	-5.65899	0.00064017	Down
AT5G49800	AT5G49800	AT5G49800	-5.65494	0.000191708	Down
AT3G22790	NET1A	AT3G22790	-5.64482	0.00168126	Down
AT1G29660	AT1G29660	AT1G29660	-5.62147	1.59e-12	Down
AT4G27595	AT4G27595	AT4G27595	-5.60071	0.000265934	Down
AT1G79840	GL2	AT1G79840	-5.59785	0.000417069	Down
AT1G60060	AT1G60060	AT1G60060	-5.54143	0.00132432	Down
AT3G12710	AT3G12710	AT3G12710	-5.52005	0.00344485	Down
AT2G37640	EXP3	AT2G37640	-5.50042	1.3e-05	Down
AT2G32990	GH9B8	AT2G32990	-5.49555	3.55e-05	Down
AT5G18010	SAUR19	AT5G18010	-5.47744	0.00120513	Down
AT4G33790	CER4	AT4G33790	-5.47029	0.0071824	Down
AT4G01580	AT4G01580	AT4G01580	-5.42844	0.00133945	Down
AT1G09750	AT1G09750	AT1G09750	-5.40039	3.98e-07	Down
AT3G03840	SAUR27	AT3G03840	-5.35137	0.000951489	Down
AT2G22810	ACS4	AT2G22810	-5.33487	0.00244032	Down
AT1G15580	IAA5	AT1G15580	-5.32695	0.00112111	Down
AT1G70830	MLP28	AT1G70830	-5.31525	2.12e-06	Down
AT2G28140	AT2G28140	AT2G28140	-5.29185	0.000978807	Down
AT5G59360	AT5G59360	AT5G59360	-5.2666	0.0010996	Down
AT1G78820	AT1G78820	AT1G78820	-5.26572	2.68e-09	Down
AT2G26710	BAS1	AT2G26710	-5.25984	0.000120708	Down
AT5G27330	AT5G27330	AT5G27330	-5.21722	0.00313404	Down
AT4G08040	ACS11	AT4G08040	-5.2028	0.00336197	Down
AT2G39330	JAL23	AT2G39330	-5.18732	2.37e-06	Down
AT2G42870	PAR1	AT2G42870	-5.16719	0.0032455	Down
AT3G22120	CWLP	AT3G22120	-5.11259	1.95e-08	Down
AT5G66520	AT5G66520	AT5G66520	-5.10751	0.00100692	Down
AT4G01460	AT4G01460	AT4G01460	-5.10253	0.00046648	Down
AT5G58390	AT5G58390	AT5G58390	-5.10113	0.0163771	Down
AT3G18960	AT3G18960	AT3G18960	-5.10046	0.00493677	Down
AT5G62730	AT5G62730	AT5G62730	-5.07701	0.00266225	Down
AT1G11545	XTH8	AT1G11545	-5.06402	0.00120929	Down
AT4G26540	AT4G26540	AT4G26540	-5.05888	1.04e-07	Down
AT5G62940	HCA2	AT5G62940	-5.05512	0.00125258	Down
AT1G53070	AT1G53070	AT1G53070	-5.05511	0.00232779	Down
AT3G06140	LUL4	AT3G06140	-5.05179	0.00186778	Down
AT3G22142	AT3G22142	AT3G22142	-5.03949	0.0108329	Down
AT2G10940	AT2G10940	AT2G10940	-5.02418	2.07e-05	Down
AT3G01345	AT3G01345	AT3G01345	-5.01175	0.0259595	Down
AT4G14130	XTH15	AT4G14130	-5.00921	0.00847373	Down
AT4G28190	ULT1	AT4G28190	-4.99882	0.00160483	Down
AT4G34580	COW1	AT4G34580	-4.99769	0.0203383	Down
AT3G03820	SAUR29	AT3G03820	-4.98288	2.1e-05	Down
AT3G46490	AT3G46490	AT3G46490	-4.97558	0.00896474	Down
AT2G33330	PDLP3	AT2G33330	-4.97295	0.00048568	Down
AT4G22560	AT4G22560	AT4G22560	-4.96429	0.00407242	Down
AT1G29500	AT1G29500	AT1G29500	-4.9487	8.83e-07	Down
AT1G63470	AT1G63470	AT1G63470	-4.94178	0.00158161	Down
AT5G02760	AT5G02760	AT5G02760	-4.91605	0.00416174	Down
AT5G57760	AT5G57760	AT5G57760	-4.90165	0.0108701	Down
AT3G03830	SAUR28	AT3G03830	-4.89631	0.00417693	Down
AT3G58120	BZIP61	AT3G58120	-4.89543	8.29e-05	Down
AT1G67750	AT1G67750	AT1G67750	-4.88644	0.00409469	Down
AT5G08640	FLS1	AT5G08640	-4.86749	0.000553412	Down
AT3G18217	ath-MIR157c	AT3G18217	-4.86736	0.0061799	Down
AT4G30020	AT4G30020	AT4G30020	-4.86607	5.18e-09	Down
AT3G48550	AT3G48550	AT3G48550	-4.84173	0.00149776	Down
AT3G43960	AT3G43960	AT3G43960	-4.83904	0.000624964	Down
AT1G69080	AT1G69080	AT1G69080	-4.83656	0.00778666	Down
AT4G25420	GA20OX1	AT4G25420	-4.80719	0.00638401	Down
AT3G13405	ath-MIR169a	AT3G13405	-4.80621	0.00842639	Down
AT5G63180	AT5G63180	AT5G63180	-4.79848	1.83e-05	Down
AT2G05160	AT2G05160	AT2G05160	-4.79492	0.00512129	Down
AT1G59720	CRR28	AT1G59720	-4.79028	0.00139166	Down
AT5G41460	AT5G41460	AT5G41460	-4.79009	0.00915971	Down
AT5G17700	AT5G17700	AT5G17700	-4.781	0.00454216	Down
AT5G13140	AT5G13140	AT5G13140	-4.77056	4.83e-07	Down
AT5G25490	AT5G25490	AT5G25490	-4.75901	0.00608324	Down
AT4G37800	XTH7	AT4G37800	-4.73934	1.04e-10	Down
AT4G37750	ANT	AT4G37750	-4.73691	0.00458319	Down
AT5G48450	sks3	AT5G48450	-4.72286	4.41e-05	Down
AT1G29670	AT1G29670	AT1G29670	-4.7223	1.02e-11	Down
AT1G52030	MBP2	AT1G52030	-4.71586	0.0204882	Down
AT1G13650	AT1G13650	AT1G13650	-4.69777	2.9e-09	Down
AT2G16850	PIP2;8	AT2G16850	-4.69687	0.00214792	Down
AT1G07485	AT1G07485	AT1G07485	-4.69446	0.00343515	Down
AT4G14770	TCX2	AT4G14770	-4.69305	0.00679554	Down
AT1G70895	CLE17	AT1G70895	-4.67675	0.00156227	Down
AT2G21050	LAX2	AT2G21050	-4.66333	0.00203694	Down
AT5G54190	PORA	AT5G54190	-4.65959	0.0229424	Down
AT4G00400	GPAT8	AT4G00400	-4.65476	9.88e-06	Down
AT2G32100	OFP16	AT2G32100	-4.65233	8.64e-06	Down
AT5G56320	EXPA14	AT5G56320	-4.64654	0.00385109	Down
AT4G27440	PORB	AT4G27440	-4.63349	6.28e-11	Down
AT2G42380	BZIP34	AT2G42380	-4.61325	0.0024462	Down
AT5G20740	AT5G20740	AT5G20740	-4.61066	0.00112932	Down
AT3G29370	P1R3	AT3G29370	-4.60958	0.0304126	Down
AT5G27780	SAUR75	AT5G27780	-4.56735	0.00272541	Down
AT5G39150	AT5G39150	AT5G39150	-4.54857	0.018261	Down
AT3G58100	PDCB5	AT3G58100	-4.54121	0.00203092	Down
AT1G07490	RTFL3	AT1G07490	-4.5381	0.00835595	Down
AT1G07880	ATMPK13	AT1G07880	-4.53193	0.00234426	Down
AT1G54820	AT1G54820	AT1G54820	-4.52732	2.03e-07	Down
AT2G37720	TBL15	AT2G37720	-4.52114	0.00853619	Down
AT5G10605	AT5G10605	AT5G10605	-4.51904	5.83e-05	Down
AT3G45680	AT3G45680	AT3G45680	-4.51841	0.00378196	Down
AT5G61412	AT5G61412	AT5G61412	-4.50518	0.00942138	Down
AT5G60490	FLA12	AT5G60490	-4.4958	0.0152775	Down
AT5G44020	AT5G44020	AT5G44020	-4.49289	1.02e-11	Down
AT3G12610	DRT100	AT3G12610	-4.48624	2.18e-08	Down
AT4G11485	LCR11	AT4G11485	-4.47648	0.0448725	Down
AT3G43920	DCL3	AT3G43920	-4.4671	0.0024579	Down
AT1G18620	TRM3	AT1G18620	-4.45331	1.01e-05	Down
AT2G19170	SLP3	AT2G19170	-4.4517	0.010779	Down
AT1G29510	SAUR68	AT1G29510	-4.4508	2.76e-05	Down
AT4G35730	AT4G35730	AT4G35730	-4.45042	0.0085488	Down
AT2G34620	AT2G34620	AT2G34620	-4.43453	1.03e-08	Down
AT5G44560	VPS2.2	AT5G44560	-4.42795	0.00561681	Down
AT3G15680	AT3G15680	AT3G15680	-4.40822	0.000243025	Down
AT5G18050	SAUR22	AT5G18050	-4.4078	0.00695947	Down
AT4G18970	AT4G18970	AT4G18970	-4.40762	0.000461555	Down
AT1G13670	AT1G13670	AT1G13670	-4.40507	0.0304627	Down
AT3G17680	AT3G17680	AT3G17680	-4.40449	0.00857077	Down
AT1G49730	AT1G49730	AT1G49730	-4.3987	0.00146053	Down
AT2G24350	AT2G24350	AT2G24350	-4.39237	0.00380795	Down
AT4G22410	AT4G22410	AT4G22410	-4.38864	0.00406045	Down
AT3G27690	LHCB2.3	AT3G27690	-4.38584	4.35e-06	Down
AT5G52940	AT5G52940	AT5G52940	-4.37566	0.0367055	Down
AT4G30180	AT4G30180	AT4G30180	-4.37283	0.0470855	Down
AT1G52770	AT1G52770	AT1G52770	-4.37203	0.00152359	Down
AT1G78320	GSTU23	AT1G78320	-4.3685	0.00550503	Down
AT4G30410	AT4G30410	AT4G30410	-4.36196	0.0064174	Down
[truncated: 2,509 more rows]
