# Supplementary material for: Nuclear coat protein drives a multifaceted tolerance program during Turnip crinkle virus infection
Source: Research Square preprint supplement (doi:10.21203/rs.3.rs-8695072/v1), 2026-02-12
Supplement: Supplementary file 3 [file 474c4601ca2aca845e78c17f.xlsx]

## Sheet: TCV-specific_UP_DEGs
gene	Pattern	padj	Log2(TCV/Mock)	Log2(TCV/NES)	TCV_1	TCV_2	TCV_3	Mock_1	Mock_2	Mock_3	NES_1	NES_2	NES_3
AT1G19530	TCV > Mock = NES	-2.22045e-16	11.7771	11.7771	44.1949	25.0023	36.0605	0	0	0	0	0	0
AT5G54040	TCV > Mock = NES	-2.22045e-16	11.1074	11.1074	28.4811	19.6447	18.0303	0	0	0	0	0	0
AT1G18860	TCV > Mock = NES	-2.22045e-16	15.4733	8.10707	406.593	534.871	423.237	0	0	0	0	0.757011	4.16264
AT2G24460	TCV > Mock = NES	-2.22045e-16	11.3057	6.46021	31.4275	16.9659	27.5199	0	0	0	0	0	0.832528
AT2G41445	TCV > Mock = NES	-2.22045e-16	6.83234	6.20537	107.05	239.308	185.047	2.269	2.36449	0	2.62984	4.54207	0
AT5G10660	TCV > Mock = NES	-2.22045e-16	7.84411	6.06479	118.835	86.6152	73.07	0	1.18225	0	0.876615	0.757011	2.49758
AT1G65483	TCV > Mock > NES	-2.22045e-16	16.3472	6.04762	895.683	926.872	678.507	0	0	0	12.2726	11.3552	14.153
AT4G33020	TCV > Mock = NES	-2.22045e-16	5.45851	5.89613	62.8549	54.4694	83.5086	4.538	0	0	1.75323	0.757011	0.832528
AT4G35770	TCV > Mock > NES	-2.22045e-16	7.08361	5.45327	5670.69	2734.18	3055.66	27.228	39.0141	18.2219	193.732	29.5234	38.2963
AT3G09960	TCV > Mock > NES	-2.22045e-16	10.6443	5.36426	1064.61	839.364	795.23	0	0	1.65653	9.64276	7.57011	48.2866
AT3G22560	TCV > Mock = NES	-2.22045e-16	6.86488	5.08979	144.37	260.739	132.855	3.4035	1.18225	0	3.50646	2.27103	9.99033
AT2G35730	TCV > Mock = NES	-2.22045e-16	6.65735	4.84648	40.2664	39.2894	37.9585	1.1345	0	0	0.876615	1.51402	1.66506
AT3G55890	TCV > Mock = NES	-2.22045e-16	4.49193	4.58029	976.216	561.659	650.987	27.228	31.9206	38.1003	26.2984	31.0375	34.1336
AT3G02240	TCV > Mock = NES	-2.22045e-16	11.2304	4.39886	24.5527	29.467	18.0303	0	0	0	2.62984	0.757011	0
AT4G24026	TCV > Mock = NES	-2.22045e-16	4.16165	4.20592	353.536	325.918	342.575	20.421	28.3739	8.28267	14.0258	11.3552	29.971
AT2G27660	TCV > Mock = NES	-2.22045e-16	4.48819	3.91033	7543.58	4763.84	4826.42	300.642	134.776	327.994	390.97	441.338	307.203
AT2G32150	TCV > Mock = NES	-2.22045e-16	3.51714	3.87668	8466.76	5126.37	5389.15	744.231	509.548	404.195	344.51	372.45	575.277
AT3G30842	TCV > Mock = NES	-2.22045e-16	11.6513	3.86392	28.4811	35.7176	32.2647	0	0	0	1.75323	1.51402	3.33011
AT1G80920	TCV > Mock = NES	-2.22045e-16	3.81196	3.83945	10672.6	6222.01	7942.81	670.489	698.707	399.225	421.652	495.842	817.542
AT3G48580	TCV > Mock = NES	-2.22045e-16	5.73303	3.8293	139.459	91.0799	77.8148	3.4035	2.36449	0	7.88953	3.78506	9.99033
AT4G18980	TCV > Mock = NES	-2.22045e-16	3.43785	3.62397	157.137	140.192	124.314	14.7485	5.91123	18.2219	15.7791	7.57011	10.8229
AT5G40240	TCV > Mock > NES	-2.22045e-16	4.78732	3.51019	4395.92	3453.89	3304.28	141.812	139.505	122.584	282.27	268.739	427.919
AT3G16510	TCV > Mock = NES	-2.22045e-16	2.69963	3.334	2930.61	1822.49	1899.82	417.496	222.262	384.316	228.796	245.272	185.654
AT1G46768	TCV > Mock = NES	-2.22045e-16	3.35557	3.32867	1122.55	1138.5	1003.05	116.853	107.584	94.4225	111.33	112.795	100.736
AT5G12960	TCV > Mock = NES	-2.22045e-16	5.43609	3.24984	35.5347	46.04	35.5747	0	2.6766	0	2.78238	6.0576	3.44833
AT2G34600	TCV > Mock = NES	-2.22045e-16	2.48632	3.09111	329.006	498.261	392.87	158.83	39.0141	19.8784	24.5452	62.8319	55.7793
AT5G62770	TCV > Mock = NES	-2.22045e-16	2.88108	3.07115	1859.13	1146.54	1449.06	176.982	213.986	213.693	181.459	152.916	195.644
AT5G38344	TCV > Mock > NES	-2.22045e-16	12.2251	3.05976	49.1054	36.6106	57.8866	0	0	0	1.75323	12.1122	3.33011
AT2G38690	TCV > Mock > NES	-2.22045e-16	6.23169	3.00978	153.209	156.265	126.212	3.4035	2.36449	0	14.0258	15.8972	24.1433
AT2G07725	TCV > Mock = NES	-2.22045e-16	2.48127	2.87697	92.2082	66.0776	93.9472	12.7382	14.1869	18.2219	8.31381	13.5081	12.4879
AT3G51430	TCV > Mock > NES	-2.22045e-16	4.78902	2.85893	10510.5	11566.3	8475.17	399.344	235.267	470.456	1271.09	1029.54	1910.65
AT2G16050	TCV > NES > Mock	-2.22045e-16	1.98386	2.8326	319.185	212.52	238.189	62.3975	79.2104	53.0091	32.4347	34.8225	40.7938
AT1G63245	TCV > Mock = NES	-2.22045e-16	2.60265	2.81646	248.473	192.875	178.405	37.4385	41.3786	23.1915	37.6944	21.9533	28.3059
AT3G02910	TCV > Mock = NES	-2.22045e-16	3.01617	2.76121	4594.3	3010.1	3070.84	401.613	354.674	563.222	628.533	314.16	631.888
AT2G32550	TCV > Mock = NES	-2.22045e-16	2.5082	2.69178	99.193	116.975	72.1211	15.883	24.8272	9.93921	12.2726	18.1683	14.153
AT5G57655	TCV > Mock = NES	-2.22045e-16	2.92718	2.66204	23899.6	14994.3	16010.9	2492.49	2527.64	2198.22	3722.98	2496.62	2455.12
AT1G05340	TCV > Mock > NES	-2.22045e-16	5.69695	2.61282	2256.89	1322.44	1875.15	47.649	42.5608	14.9088	561.033	207.421	123.214
AT1G24145	TCV > Mock > NES	-2.22045e-16	3.94296	2.60847	5845.51	4212	4190.61	389.133	200.982	336.277	743.369	639.675	953.244
AT2G37970	TCV > Mock = NES	-2.22045e-16	2.36185	2.5224	21353	14821.9	17161	4203.32	2798.37	3374.36	3519.61	2694.96	3068.7
AT1G47128	TCV > Mock = NES	-2.22045e-16	2.27006	2.48412	74933.9	59157.3	54609.9	13764.9	11057.5	14299.2	12142	9304.43	12280.6
AT1G73880	TCV > Mock = NES	-2.22045e-16	2.04813	2.48265	474.358	514.334	366.299	95.2979	89.8506	142.462	80.6486	81.0002	80.7552
AT3G02140	TCV > NES > Mock	-2.22045e-16	1.84527	2.35296	797.472	660.776	730.7	192.865	234.085	182.219	177.076	117.337	134.037
AT1G31290	TCV > Mock > NES	-2.22045e-16	6.89457	2.24238	2250.01	1417.1	1519.29	10.2105	20.0982	13.2523	311.198	377.749	407.106
AT4G13830	TCV > NES > Mock	-2.22045e-16	1.51285	2.21899	2617.32	2129.66	1998.51	988.149	638.413	737.158	362.919	389.104	696.826
AT3G44880	TCV > Mock = NES	-2.22045e-16	2.38604	2.20004	9700.29	11179.6	7695.13	2144.2	1591.3	1731.08	1794.43	1732.8	2691.56
AT1G44770	TCV > Mock = NES	-2.22045e-16	2.31632	2.16121	5498.83	4591.5	4732.47	1078.91	894.96	1002.2	1092.26	963.675	1257.95
AT4G13510	TCV > NES > Mock	-2.22045e-16	1.28605	2.1111	9293.69	8596.34	8278.74	3037.05	2631.68	5062.37	2193.29	1650.28	2213.69
AT2G33830	TCV > Mock > NES	-2.22045e-16	5.41357	2.09846	1415.22	1032.24	1394.02	17.0175	53.201	19.8784	457.593	227.103	212.295
AT1G15740	TCV > Mock > NES	-2.22045e-16	2.48582	2.08561	10456.5	10090.2	10319	2244.04	1467.17	1799	2274.82	2118.12	2878.88
AT3G13720	TCV > NES > Mock	-2.22045e-16	1.1147	2.083	1491.82	1256.37	1419.65	521.87	665.604	737.158	333.114	288.421	362.149
AT3G10420	TCV > NES > Mock	-2.22045e-16	1.27781	2.07416	24735.4	24421.9	20133.2	10072.1	7681.05	10823.8	5349.1	4526.93	6578.63
AT3G21790	TCV > Mock = NES	-2.22045e-16	2.40603	2.05723	5313.21	4106.63	3743.65	1011.97	688.067	783.541	1091.39	966.703	1104.76
AT1G71970	TCV > NES > Mock	-2.22045e-16	1.50057	2.05049	534.267	584.876	480.174	198.537	167.879	198.784	85.0316	128.692	172.333
AT4G11170	TCV > Mock > NES	-2.22045e-16	9.7614	2.04428	738.546	584.876	671.865	2.269	0	0	302.432	118.851	62.4396
AT1G09560	TCV > NES > Mock	-2.22045e-16	1.08944	2.03888	4335.03	4791.52	3963.81	2182.78	1808.84	2160.12	1122.94	922.04	1140.56
AT3G01290	TCV > Mock = NES	-2.22045e-16	2.54111	1.96032	9843.67	6893.5	9865.4	1735.78	1146.78	1688.01	3378.47	2177.16	1280.43
AT3G27020	TCV > NES > Mock	-2.22045e-16	1.23047	1.95065	6224.6	6888.14	5776.33	2548.09	2608.03	2893.97	1583.17	1444.38	1859.03
AT1G10690	TCV > Mock = NES	-2.22045e-16	1.97238	1.8918	482.215	360.748	461.195	139.543	109.949	82.8267	71.8824	118.851	160.678
AT2G24240	TCV > Mock = NES	-2.22045e-16	2.31803	1.88841	464.537	313.422	381.482	89.6254	81.5749	61.2918	135.875	92.3554	84.9178
AT1G25540	TCV > Mock = NES	-2.22045e-16	1.80412	1.86689	2107.6	1781.42	1829.6	559.308	491.814	586.413	544.378	481.459	541.975
AT4G21930	TCV > Mock = NES	-2.22045e-16	1.76405	1.83905	708.1	662.562	557.04	228.034	107.584	231.915	173.57	161.243	203.969
AT3G61190	TCV > NES > Mock	-2.22045e-16	1.29131	1.83159	7029.93	6115.75	5429.01	3211.77	2033.46	2344	1546.35	2044.69	1627.59
AT1G10140	TCV > Mock > NES	-2.22045e-16	4.8452	1.82445	677.655	546.479	628.212	26.0935	20.0982	18.2219	365.548	65.86	91.578
AT1G77120	TCV > Mock > NES	-2.22045e-16	2.18169	1.80274	444.895	483.974	461.195	94.1634	78.0282	134.179	141.135	116.58	140.697
AT4G00200	TCV > Mock > NES	-2.22045e-16	2.55554	1.72926	333.917	262.524	308.412	63.532	47.2898	43.0699	93.7978	99.1685	79.9226
AT5G07470	TCV > Mock > NES	-2.22045e-16	2.48894	1.68612	4501	3989.66	3804.39	730.617	656.146	803.419	1280.73	1184.72	1355.35
AT1G14130	TCV > NES > Mock	-2.22045e-16	1.24054	1.68382	767.027	712.566	637.702	367.578	235.267	293.207	208.634	208.935	241.433
AT1G01490	TCV > NES > Mock	-2.22045e-16	1.05482	1.61032	3605.32	3883.4	2920.9	1624.6	2031.1	1355.05	1094.89	1075.71	1238.8
AT4G02660	TCV > Mock = NES	-2.22045e-16	1.63915	1.60016	261.241	322.351	296.076	85.0874	69.7525	127.553	75.3889	109.01	105.731
AT1G69840	TCV > Mock = NES	-2.22045e-16	1.30059	1.59315	10651	8334.7	9038.86	2701.24	4731.35	3944.21	3223.31	2716.91	3348.43
AT1G71910	TCV > Mock > NES	-2.22045e-16	3.07367	1.58354	363.38	412.538	281.841	55.5905	31.9206	38.1003	86.7849	102.954	163.175
AT5G64400	TCV > NES > Mock	-2.22045e-16	1.10724	1.556	5542.04	4487.03	5186.07	2035.29	2887.04	2140.24	1570.02	1588.97	2015.55
AT3G10640	TCV > Mock = NES	-2.22045e-16	1.33321	1.53636	2209.74	1751.95	1866.61	729.483	821.661	762.006	674.117	577.6	757.6
AT1G17450	TCV > Mock > NES	-2.22045e-16	2.25437	1.50522	2328.58	2375.22	2099.1	461.741	351.127	612.918	812.622	763.824	820.04
AT4G23210	TCV > Mock > NES	-2.22045e-16	6.00597	1.49857	998.942	866.246	706.523	21.3683	1.21062	17.4085	449.196	376.434	84.4882
AT4G01540	TCV > Mock > NES	-2.22045e-16	2.85091	1.47372	1538.96	1131.36	1012.54	212.151	135.958	162.34	489.151	398.945	437.909
AT1G03380	TCV > Mock = NES	-2.22045e-16	1.35583	1.43293	5534.18	5411.05	4689.77	2188.45	1740.27	2180	1790.92	1648.01	2351.89
AT3G07580	TCV > Mock = NES	-2.22045e-16	1.65506	1.42567	426.235	409.86	379.585	135.005	121.771	129.21	133.245	137.776	181.491
AT1G50740	TCV > Mock = NES	-2.22045e-16	1.29755	1.39935	2161.62	1677.83	1723.31	807.763	724.716	730.532	645.188	583.656	879.982
AT4G24020	TCV > Mock = NES	-2.22045e-16	1.35584	1.38055	3481.57	2813.65	2952.22	1166.27	1350.12	1096.63	1276.35	1134.76	1140.56
AT5G11770	TCV > Mock = NES	-2.22045e-16	1.22835	1.36255	5137.41	6022.88	5212.64	2172.57	2337.3	2478.18	2015.34	1899.34	2452.63
AT1G08180	TCV > Mock = NES	-2.22045e-16	1.23846	1.35851	266.151	238.415	249.577	132.736	95.7619	91.1094	78.8953	87.8133	127.377
AT5G24460	TCV > Mock = NES	-2.22045e-16	1.04796	1.35375	1293.44	1049.2	1016.34	574.057	540.286	510.213	497.917	412.571	403.776
AT3G48850	TCV > Mock > NES	-2.22045e-16	9.38712	1.35285	533.285	542.015	464.042	2.269	0	0	299.802	210.449	92.4106
AT5G05710	TCV > Mock = NES	-2.22045e-16	1.31942	1.32302	315.257	252.702	297.974	112.315	133.594	101.049	143.765	108.253	94.0756
AT5G58720	TCV > Mock = NES	-2.22045e-16	1.1753	1.32	4722.96	3737.85	3853.73	1966.09	1797.01	1689.67	1609.46	1440.59	1882.34
AT5G05230	TCV > Mock > NES	-2.22045e-16	1.98617	1.2949	1640.12	2134.13	1592.36	465.145	466.987	422.416	784.57	660.871	741.782
AT1G28540	TCV > Mock > NES	-2.22045e-16	1.65973	1.2937	590.247	561.659	580.764	199.672	146.598	202.097	227.92	207.421	271.404
AT3G51830	TCV > Mock = NES	-2.22045e-16	1.31943	1.28909	1885.65	1637.65	1710.03	610.361	605.31	881.277	748.629	600.31	792.566
AT5G67300	TCV > Mock = NES	-2.22045e-16	1.03397	1.26208	10300.3	9890.21	9628.16	6091.13	4361.3	4109.86	4468.98	3700.27	4263.37
AT3G07780	TCV > Mock = NES	-2.22045e-16	1.33205	1.2574	4940.01	4195.93	4110.9	1768.68	1876.22	1616.78	2076.7	1708.57	1755.8
AT5G06530	TCV > Mock = NES	-2.22045e-16	1.18545	1.25582	11599.7	13312	11237.6	5296.98	5246.81	5350.61	4826.64	4437.6	5873.48
AT4G33910	TCV > Mock = NES	-2.22045e-16	1.37855	1.22285	1945.56	1859.1	1792.59	771.459	640.777	740.471	724.96	712.348	960.737
AT3G04090	TCV > Mock > NES	-2.22045e-16	1.59804	1.19955	3251.76	3270.84	2858.27	887.178	1056.93	1154.6	1255.31	1199.11	1630.09
AT3G55880	TCV > Mock > NES	-2.22045e-16	2.61258	1.15884	1789.4	1341.2	1297.23	336.946	174.972	212.036	760.025	675.254	547.803
AT1G20160	TCV > Mock > NES	-2.22045e-16	3.10985	1.15839	1757.97	2830.62	2387.59	340.35	167.879	299.833	1175.54	1009.1	940.756
AT5G63110	TCV > Mock = NES	-2.22045e-16	1.2495	1.14823	1203.08	1431.38	1152.04	547.963	517.823	526.778	588.209	513.254	606.913
AT3G05360	TCV > Mock > NES	-2.22045e-16	3.49379	1.14674	1010.59	904.549	886.33	88.4909	50.8366	109.331	524.216	399.702	341.336
AT2G17720	TCV > Mock = NES	-2.22045e-16	1.33401	1.13539	2116.44	2427.9	1890.33	811.167	874.862	866.368	877.491	948.535	1103.1
AT2G42240	TCV > Mock = NES	-2.22045e-16	1.07459	1.11719	330.971	303.6	339.728	163.368	166.697	132.523	141.135	142.318	165.673
AT1G72120	TCV > Mock > NES	-2.22045e-16	2.7242	1.11288	1367.1	1462.64	1188.1	272.28	92.2151	243.511	697.785	598.796	561.124
AT3G59950	TCV > Mock = NES	-2.22045e-16	1.08561	1.10861	1703.96	1639.44	1527.83	756.711	715.258	823.298	674.117	762.31	822.537
AT3G17950	TCV > Mock = NES	-2.22045e-16	1.12066	1.08829	280.883	331.281	359.656	142.947	154.874	149.088	137.629	144.589	174.831
AT3G50650	TCV > Mock > NES	-2.22045e-16	1.49033	1.08536	549.981	419.682	464.991	180.385	151.327	178.906	190.225	253.599	232.275
AT5G03630	TCV > Mock > NES	-2.22045e-16	1.52585	1.0837	5086.34	5066.54	4797.95	2175.97	1132.59	1883.48	2562.34	2276.33	2215.36
AT1G01160	TCV > Mock = NES	-2.22045e-16	1.13667	1.06623	1188.35	1123.32	1171.97	490.104	550.926	543.343	546.131	489.786	627.726
AT4G26080	TCV > Mock = NES	-2.22045e-16	1.12728	1.05267	5572.48	5212.99	4509.46	2543.55	1815.93	2642.17	2718.38	2183.98	2470.94
AT2G36300	TCV > Mock = NES	-2.22045e-16	1.10366	1.04861	1117.64	1037.6	1272.56	516.197	585.211	493.647	528.599	538.235	590.262
AT2G26230	TCV > Mock = NES	-2.22045e-16	1.3252	1.01473	2772.49	2372.54	2292.69	1060.76	893.778	1013.8	1152.75	1085.55	1442.77
AT1G02890	TCV > Mock = NES	-2.22045e-16	1.01622	1.01186	7256.8	5981.81	6303.95	3324.08	2766.45	3571.49	3339.03	3037.13	3315.12
AT3G01650	TCV > Mock = NES	-2.22045e-16	1.2593	1.00319	897.647	694.708	811.362	329.005	323.935	351.185	419.022	408.029	372.14
AT1G27770	TCV > Mock = NES	-2.22045e-16	1.05901	1.00023	11462.2	9207.11	9263.76	4996.33	4399.14	4971.26	5459.56	4677.57	4826.99
AT5G43770	TCV > Mock = NES	0	14.199	14.199	114.907	280.383	168.915	0	0	0	0	0	0
AT3G61400	TCV > Mock = NES	0	13.737	13.737	89.3719	175.016	145.191	0	0	0	0	0	0
AT1G67148	TCV > Mock = NES	0	13.0808	13.0808	106.068	74.114	79.7127	0	0	0	0	0	0
AT4G38880	TCV > Mock = NES	0	6.72925	12.0658	44.1949	46.4329	37.9585	0	1.18225	0	0	0	0
AT4G11650	TCV > Mock = NES	0	18.8695	11.6688	7400.19	4122.71	2844.99	0	0	0	4.38307	0	0
AT1G73220	TCV > Mock = NES	0	11.4512	11.4512	35.3559	26.7882	21.8261	0	0	0	0	0	0
AT1G30990	TCV > Mock = NES	0	11.439	11.439	22.5885	31.2529	29.4178	0	0	0	0	0	0
AT2G44240	TCV > Mock = NES	0	18.5494	10.5517	2587.86	5145.12	3775.92	0	0	0	4.38307	0.757011	2.49758
AT3G01420	TCV > Mock > NES	0	18.2862	8.80874	5042.15	2132.34	2415.11	0	0	0	12.2726	0.757011	8.32528
AT5G38940	TCV > Mock = NES	0	13.0245	8.31119	57.9444	100.902	91.1003	0	0	0	0	0.757011	0
AT1G26390	TCV > Mock > NES	0	18.4651	7.2774	3249.8	5242.45	2363.86	0	0	0	49.967	0	19.9807
AT4G14368	TCV > Mock > NES	0	11.1572	7.268	1298.35	2308.25	1643.6	2.269	0	0	17.5323	9.84115	6.66022
AT3G19550	TCV > Mock = NES	0	9.30173	7.15909	458.645	313.422	292.28	0	0	1.65653	0	0.757011	6.66022
AT5G39520	TCV > Mock > NES	0	11.1068	6.95882	9541.18	8151.65	6054.37	3.4035	2.36449	4.9696	19.2855	24.2244	147.357
AT4G28420	TCV > Mock = NES	0	14.3633	6.94654	229.813	241.094	161.323	0	0	0	3.50646	0.757011	0.832528
AT4G01430	TCV > Mock = NES	0	7.06851	6.81556	184.636	127.69	161.323	1.1345	2.36449	0	1.75323	0.757011	1.66506
AT2G25600	TCV > Mock = NES	0	11.515	6.59754	25.5348	36.6106	25.622	0	0	0	0.876615	0	0
AT1G61700	TCV > Mock = NES	0	12.4889	6.59553	72.676	43.7541	55.9887	0	0	0	1.75323	0	0
AT1G07600	TCV > Mock > NES	0	16.8337	6.54546	1310.49	1213.03	980.571	0	0	0	0	8.23704	29.2475
AT1G01453	TCV > Mock = NES	0	12.8837	6.53076	96.2466	53.5764	76.8659	0	0	0	0	0.757011	1.66506
AT2G03360	TCV > Mock = NES	0	7.96596	6.45776	136.513	67.8635	98.692	0	1.18225	0	1.75323	0	1.66506
AT1G67980	TCV > Mock > NES	0	17.2485	6.4234	2330.54	805.432	1535.42	0	0	0	34.188	6.05609	14.153
AT5G38780	TCV > Mock = NES	0	5.37497	6.39012	179.726	141.978	103.437	4.538	2.36449	3.31307	0.876615	0	4.16264
AT1G09240	TCV > Mock = NES	0	6.23135	6.38055	2490.63	2015.37	2032.68	68.0699	2.36449	16.5653	26.2984	19.6823	32.4686
AT4G15610	TCV > Mock > NES	0	10.0509	6.36183	8741.75	4223.61	5485.95	3.4035	2.36449	11.5957	151.654	39.3646	33.3011
AT3G29035	TCV > Mock > NES	0	10.324	6.10567	753.277	337.531	463.093	0	1.18225	0	13.1492	6.05609	3.33011
AT5G49420	TCV > Mock = NES	0	7.1437	6.06941	63.8371	57.1482	43.6522	1.1345	0	0	0	0.757011	1.66506
AT1G14080	TCV > Mock = NES	0	7.37447	6.02741	214.1	295.563	256.22	3.4035	1.18225	0	2.62984	0.757011	8.32528
AT5G44380	TCV > Mock = NES	0	6.51596	5.88274	425.253	333.067	162.272	3.4035	0	6.62614	2.62984	3.78506	9.1578
AT5G63225	TCV > Mock > NES	0	8.41924	5.83543	276.955	558.088	309.361	0	0	3.31307	9.64276	4.54207	5.82769
AT5G51680	TCV > Mock = NES	0	6.63659	5.80701	78.6905	75.8999	74.1243	2.269	0	0	0.876615	1.51402	1.66506
AT1G78780	TCV > Mock > NES	0	7.63207	5.79083	1729.49	857.223	1041.01	4.538	7.09347	6.62614	24.5452	31.7945	9.1578
AT5G56820	TCV > Mock = NES	0	11.4966	5.74209	20.6243	36.6106	29.4178	0	0	0	0	0.757011	0.832528
AT4G23680	TCV > Mock > NES	0	7.49181	5.67684	2366.88	1569.79	1569.58	4.538	9.45796	16.5653	23.6686	18.1683	65.7697
AT4G10860	TCV > Mock > NES	0	14.6927	5.59895	227.849	362.534	204.027	0	0	0	1.75323	3.78506	10.8229
AT4G11910	TCV > Mock > NES	0	7.30574	5.58845	2975.79	2400.22	2163.63	14.7485	21.2804	11.5957	35.9412	41.6356	79.0901
AT3G26820	TCV > Mock = NES	0	5.63181	5.58749	22.5885	25.8953	35.1116	0	0	1.65653	0.876615	0	0.832528
AT3G51360	TCV > Mock = NES	0	9.00149	5.57405	179.726	207.162	234.393	0	1.18225	0	4.38307	5.29908	3.33011
AT5G05340	TCV > Mock > NES	0	15.3413	5.56684	357.488	564.338	323.596	0	0	0	13.1492	10.5982	2.49758
AT3G45130	TCV > Mock > NES	0	16.8556	5.55251	1468.25	1091.17	998.307	0	0	0	1.75323	17.4113	56.6119
AT3G44300	TCV > Mock > NES	0	11.6328	5.54002	18331.7	21949.8	18296.5	7.94717	7.15495	3.31473	643.203	200.761	414.996
AT4G37070	TCV > Mock = NES	0	7.25631	5.46971	157.137	103.581	105.335	0	2.36449	0	2.62984	2.27103	3.33011
AT1G51860	TCV > Mock > NES	0	10.6645	5.4276	5973.18	5538.91	4962.12	6.80699	0	3.31307	71.8824	88.5703	222.285
AT5G49690	TCV > Mock = NES	0	5.41874	5.40841	235.706	118.761	233.444	5.6725	4.72898	3.31307	5.25969	6.05609	2.49758
AT2G43570	TCV > Mock > NES	0	11.8981	5.39611	30647.7	21977	22766.5	9.07599	2.36449	8.28267	532.982	490.543	766.758
AT1G22500	TCV > Mock > NES	0	7.43555	5.37789	675.691	898.298	657.63	3.4035	9.45796	0	17.5323	21.9533	14.153
AT3G14060	TCV > Mock > NES	0	8.30794	5.37362	1866.99	1953.75	1807.77	11.345	4.72898	1.65653	45.584	31.0375	59.1095
AT3G46280	TCV > Mock = NES	0	7.93511	5.36956	446.859	487.545	450.757	1.1345	1.18225	3.31307	7.88953	18.9253	6.66022
AT1G65730	TCV > Mock > NES	0	7.2664	5.25943	1643.07	749.177	991.665	6.80699	3.54674	11.5957	29.8049	22.7103	35.7987
AT3G55910	TCV > Mock = NES	0	4.69877	5.25064	314.275	258.06	289.433	10.2105	13.0047	9.93921	7.01292	10.5982	4.99517
AT4G13660	TCV > Mock = NES	0	6.02795	5.24886	140.442	121.44	70.2231	3.4035	0	1.65653	0	4.54207	4.16264
AT1G48000	TCV > Mock > NES	0	10.7044	5.20601	1245.31	1407.27	1183.35	2.269	0	0	28.0517	24.2244	51.6167
AT3G51540	TCV > Mock = NES	0	6.63675	5.19142	218.028	193.768	160.374	4.538	1.18225	0	5.25969	4.54207	5.82769
AT3G50030	TCV > Mock = NES	0	11.4556	5.12135	36.338	23.2164	24.673	0	0	0	0.876615	1.51402	0
AT2G39410	TCV > Mock = NES	0	4.18895	5.07674	68.7476	99.1164	113.875	4.538	5.91123	4.9696	4.38307	2.27103	1.66506
AT2G44380	TCV > Mock > NES	0	6.93513	5.0759	1180.49	834.899	848.371	6.80699	0	16.5653	30.6815	24.2244	29.971
AT5G22560	TCV > Mock > NES	0	13.6401	5.04857	171.869	99.1164	111.977	0	0	0	5.25969	3.78506	2.49758
AT1G56010	TCV > Mock > NES	0	7.85848	5.01304	1756.01	1452.81	1112.18	7.94149	2.36449	8.28267	49.0904	27.2524	57.4444
AT1G15040	TCV > Mock > NES	0	13.9798	5.00689	94.2824	206.269	184.098	0	0	0	2.62984	9.08414	3.33011
AT1G35230	TCV > Mock = NES	0	5.53816	4.96819	3182.03	2287.71	2410.36	73.7424	37.8319	57.9787	70.1292	82.5142	99.0708
AT4G36040	TCV > Mock = NES	0	5.53373	4.96361	32219.1	21185	28251.5	709.062	553.291	500.274	788.953	737.329	1090.61
AT4G27450	TCV > Mock > NES	0	6.56355	4.9387	15691.1	10652.8	12421.9	141.812	137.14	130.866	472.495	269.496	521.995
AT5G46960	TCV > Mock = NES	0	12.5793	4.89603	51.0696	81.2576	51.2439	0	0	0	6.1363	0	0
AT4G21120	TCV > Mock > NES	0	7.99446	4.87559	6313.98	4588.82	5542.88	36.304	8.27572	19.8784	149.025	184.711	226.447
AT1G02770	TCV > Mock = NES	0	5.28735	4.83301	326.06	491.117	282.79	11.345	11.8225	4.9696	15.7791	13.6262	9.1578
AT1G10070	TCV > Mock > NES	0	8.2882	4.82631	2194.03	1121.53	1542.06	7.94149	5.91123	1.65653	35.9412	21.1963	114.056
AT2G44390	TCV > Mock = NES	0	6.32615	4.81091	30.4454	40.1823	22.7751	1.1345	0	0	0.876615	0.757011	1.66506
AT1G54575	TCV > Mock > NES	0	11.903	4.80157	7063.32	4086.99	4181.12	1.1345	1.18225	1.65653	228.796	112.795	208.132
AT5G15843	TCV > Mock = NES	0	6.28526	4.78043	71.6939	71.3575	80.6617	0	1.18225	1.65653	1.75323	3.02805	3.33011
AT1G65510	TCV > Mock > NES	0	8.52038	4.70137	3419.7	1505.5	2239.55	9.07599	7.09347	3.31307	134.122	52.9908	88.2479
AT5G66690	TCV > Mock = NES	0	12.4832	4.67276	65.8013	66.0776	39.8564	0	0	0	0.876615	0	5.82769
AT2G36080	TCV > Mock > NES	0	6.30031	4.66826	1592.98	1281.37	1253.58	20.421	23.6449	8.28267	32.4347	41.6356	88.2479
AT4G11655	TCV > Mock = NES	0	6.48475	4.65976	194.457	233.95	226.802	1.1345	1.18225	4.9696	6.1363	10.5982	9.1578
AT2G44010	TCV > Mock = NES	0	7.41321	4.61322	88.3898	45.54	64.5294	1.1345	0	0	2.62984	3.78506	1.66506
AT5G44920	TCV > Mock > NES	0	14.1326	4.59712	152.227	191.089	195.486	0	0	0	2.62984	3.78506	15.818
AT3G07600	TCV > Mock > NES	0	15.1367	4.58901	316.239	429.504	334.983	0	0	0	14.9025	8.32712	21.6457
AT5G11920	TCV > Mock > NES	0	10.8129	4.58387	3728.08	4944.21	3463.71	3.4035	0	3.31307	55.2267	79.4862	371.307
AT1G79900	TCV > Mock > NES	0	6.43307	4.55872	720.868	492.01	432.726	9.07599	0	9.93921	22.792	21.1963	25.8084
AT5G09440	TCV > Mock > NES	0	5.66477	4.55564	6135.23	4171.82	4754.3	128.198	79.2104	89.4529	192.855	153.673	293.882
AT3G22460	TCV > Mock > NES	0	7.88366	4.54769	1464.32	1448.35	1159.63	6.80699	7.09347	3.31307	75.3889	45.4207	53.2818
AT1G70690	TCV > Mock > NES	0	5.15701	4.53593	4305.56	3911.08	3927.75	162.233	96.9441	81.1702	140.258	155.944	227.28
AT1G53890	TCV > Mock = NES	0	3.93758	4.52397	101.324	74.1632	67.2073	0	6.62885	9.18217	10.5203	0	0
AT2G21490	TCV > Mock = NES	0	10.9036	4.48202	21.6064	18.7517	17.0813	0	0	0	0.876615	0	1.66506
AT5G10210	TCV > Mock = NES	0	12.8685	4.47301	87.4077	56.2552	80.6617	0	0	0	6.1363	2.27103	1.66506
AT3G48020	TCV > Mock > NES	0	6.42274	4.45349	664.887	620.594	571.275	9.07599	5.91123	6.62614	35.0646	19.6823	29.971
AT5G08730	TCV > Mock = NES	0	11.5546	4.36844	28.4811	29.467	32.2647	0	0	0	3.50646	0	0.832528
AT5G49360	TCV > Mock > NES	0	6.20271	4.36551	13400.9	7893.59	12995.1	115.719	247.089	102.705	1083.5	178.655	401.278
AT5G15500	TCV > Mock > NES	0	7.81342	4.35348	2089.93	3193.15	1823.9	3.4035	0	28.1611	106.947	49.2057	191.481
AT3G04720	TCV > Mock > NES	0	7.68277	4.34673	5758.1	5463.9	3157.19	23.8245	21.2804	24.848	318.211	236.945	151.52
AT2G19570	TCV > NES > Mock	0	2.97445	4.34335	3199.71	2425.23	1849.53	304.046	357.038	289.894	89.4147	118.094	160.678
AT3G04070	TCV > Mock > NES	0	7.76958	4.32375	1362.18	850.972	1177.66	7.94149	5.91123	1.65653	61.363	44.6637	63.2721
AT1G16510	TCV > Mock = NES	0	5.26228	4.30071	852.47	1016.17	490.613	18.152	20.0982	23.1915	39.4477	38.6076	41.6264
AT1G65550	TCV > Mock = NES	0	10.7166	4.29501	14.7316	20.5376	15.1834	0	0	0	0.876615	0	1.66506
AT5G52720	TCV > Mock > NES	0	15.5474	4.27562	595.158	412.538	428.93	0	0	0	17.5323	8.32712	48.2866
AT5G06230	TCV > Mock > NES	0	5.96848	4.26257	907.468	730.425	674.148	11.345	10.6402	14.9088	54.3501	30.2805	35.7987
AT5G54510	TCV > Mock = NES	0	4.07578	4.25693	902.558	616.129	913.85	35.1695	46.1076	62.9483	32.4347	51.4768	43.2914
AT1G54560	TCV > Mock = NES	0	7.49664	4.24569	50.0875	78.5787	81.6107	1.1345	0	0	6.1363	0.757011	4.16264
AT2G35300	TCV > Mock = NES	0	6.09122	4.23873	29.4633	21.4306	28.4688	1.1345	0	0	1.75323	0.757011	1.66506
AT5G13330	TCV > Mock > NES	0	8.70762	4.2233	1315.04	2011.79	1413	1.1345	3.54674	6.62614	98.1809	93.1124	62.4396
AT5G09930	TCV > Mock > NES	0	4.93685	4.22059	1537	1469.78	1441.47	68.0699	22.4627	54.6656	100.811	54.5048	83.2528
AT3G04530	TCV > Mock = NES	0	6.58202	4.21974	64.8192	46.4329	50.2949	0	0	1.65653	1.75323	6.05609	0.832528
AT1G59670	TCV > Mock = NES	0	6.06376	4.19966	28.4811	24.1094	28.4688	0	1.18225	0	4.38307	0	0
AT2G29950	TCV > Mock > NES	0	8.26852	4.18893	642.299	608.18	509.534	0	2.36449	3.31307	21.9154	28.7664	45.789
AT2G20030	TCV > Mock = NES	0	12.8947	4.16535	61.8728	83.0435	83.5086	0	0	0	8.76615	2.27103	1.66506
AT5G39180	TCV > Mock > NES	0	14.0131	4.14732	164.503	189.381	142.1	0	0	0	7.88953	17.4113	2.66076
AT3G01970	TCV > Mock > NES	0	7.53325	4.11684	2565.27	1601.93	1297.23	7.94149	8.27572	13.2523	126.233	69.645	119.051
AT3G03650	TCV > Mock = NES	0	6.48555	4.11237	173.833	162.515	174.609	5.6725	0	0	4.38307	15.1402	9.99033
AT1G17020	TCV > Mock > NES	0	6.57981	4.06786	1537.98	1414.42	1114.08	7.94149	13.0047	21.535	77.1421	53.7478	111.559
AT5G44567	TCV > Mock = NES	0	3.4473	4.06392	347.666	260.739	229.649	35.1695	20.0982	21.535	17.5323	15.8972	16.6506
AT3G49780	TCV > Mock = NES	0	3.32821	4.03999	3355.86	2126.09	3046.17	331.274	257.729	260.076	192.855	158.215	167.338
AT5G40720	TCV > Mock > NES	0	5.58529	4.03975	1877.79	2131.45	1692.95	61.263	34.2851	23.1915	87.6615	90.8414	168.171
AT4G13860	TCV > Mock > NES	0	5.78946	4.03948	195.44	289.313	238.189	5.6725	2.36449	5.00439	15.7791	9.84115	18.3156
AT5G48410	TCV > Mock > NES	0	17.3715	4.03503	1530.13	2037.69	1519.29	0	0	0	191.979	65.86	52.4492
AT2G42350	TCV > Mock = NES	0	4.72257	4.01779	785.687	500.047	490.613	26.0935	21.2804	19.8784	47.3372	34.8225	27.4734
AT3G26170	TCV > Mock > NES	0	8.67889	4.0094	7320.74	5375.38	5900.49	21.7676	6.94687	16.6316	432.511	210.257	511.941
AT1G67860	TCV > NES > Mock	0	2.84036	3.99476	10322	8713.31	7302.26	1176.48	1124.32	1376.58	522.462	352.01	777.581
AT2G04100	TCV > Mock > NES	0	6.29799	3.99339	1151.03	671.491	1082.76	11.345	10.6402	14.9088	63.9929	65.944	52.4492
AT2G29350	TCV > Mock > NES	0	8.94604	3.99141	24244.3	16829.2	17403	44.2455	21.2804	53.0091	1365.77	1087.83	1222.98
AT3G10280	TCV > Mock = NES	0	4.21578	3.99126	66.7893	93.2792	50.8368	3.85616	3.27482	4.19103	1.13083	1.00683	11.0959
AT1G23510	TCV > Mock = NES	0	5.00594	3.97841	30.4454	24.1094	36.0605	1.1345	0	1.65653	0.876615	1.51402	3.33011
AT5G66890	TCV > Mock > NES	0	14.7792	3.96103	265.169	386.643	191.69	0	0	0	28.9283	14.3832	10.8229
AT3G18250	TCV > Mock > NES	0	8.90747	3.94771	1761.9	1644.8	1216.57	7.94149	0	1.65653	167.433	60.5609	71.5974
AT1G23040	TCV > Mock = NES	0	3.65231	3.94601	2833.38	2651.14	2333.5	230.303	234.085	157.371	143.765	128.692	234.773
AT4G09300	TCV > Mock > NES	0	13.1512	3.93761	118.835	85.7223	68.3252	0	0	0	4.38307	7.57011	5.82769
AT2G01610	TCV > Mock = NES	0	3.07981	3.92117	203.296	150.907	213.516	18.152	22.4627	26.5046	13.1492	15.1402	9.1578
AT4G37990	TCV > Mock > NES	0	8.54801	3.91529	229.813	257.167	144.242	0	0	1.65653	9.64276	3.02805	29.1385
AT1G33960	TCV > Mock > NES	0	11.9648	3.91173	12926.5	13926.3	9566.48	3.4035	2.36449	3.31307	669.734	399.702	1350.36
AT4G13030	TCV > Mock > NES	0	4.8213	3.90343	2360.99	2353.79	2164.58	74.8769	83.9394	84.4833	164.804	131.72	163.175
AT3G44326	TCV > Mock > NES	0	13.355	3.90326	107.05	115.189	92.0492	0	0	0	12.2726	4.54207	4.16264
AT2G45210	TCV > Mock > NES	0	6.48253	3.88838	972.287	674.17	682.303	11.345	4.72898	9.93921	45.584	40.8786	70.7648
AT2G39530	TCV > Mock > NES	0	13.7936	3.875	164.994	166.087	94.8961	0	0	0	18.4089	2.27103	8.32528
AT2G37130	TCV > Mock > NES	0	10.8706	3.86959	4586.45	4197.71	4106.16	5.6725	1.18225	0	348.893	224.075	308.868
AT1G80180	TCV > Mock = NES	0	4.11623	3.85799	5597.04	4954.03	4784.66	287.028	357.038	240.198	436.554	250.571	370.475
AT4G37010	TCV > Mock > NES	0	9.37545	3.84923	1407.57	1400.01	1326.65	4.538	0	1.65653	112.207	68.888	105.731
AT4G25110	TCV > Mock > NES	0	6.68453	3.76934	610.871	838.471	421.339	12.4795	2.36449	3.31307	33.3114	43.9067	59.942
AT4G00700	TCV > Mock > NES	0	10.4029	3.7529	9844.66	9507.14	8286.33	10.2105	3.54674	6.62614	462.853	488.272	1098.94
AT2G23110	TCV > Mock = NES	0	12.8877	3.74689	68.7476	74.114	84.4576	0	0	0	3.50646	7.57011	5.82769
AT5G22550	TCV > Mock > NES	0	13.7668	3.73979	159.102	121.44	137.599	0	0	0	12.2726	9.84115	9.1578
AT3G16770	TCV > Mock = NES	0	3.69769	3.73648	33788.5	24263.9	23340.7	2063.65	1676.42	2532.84	2821.82	1582.15	1702.52
AT2G17740	TCV > Mock > NES	0	7.17652	3.73481	218.028	348.247	190.741	0	3.54674	1.65653	25.4218	10.5982	20.8132
AT3G10320	TCV > Mock > NES	0	8.48264	3.72355	3102.48	2836.87	2412.26	7.94149	7.09347	8.28267	259.478	211.206	161.51
AT5G62865	TCV > Mock = NES	0	3.8039	3.72193	585.337	321.459	458.348	27.228	39.0141	31.4742	53.4735	24.9814	24.9758
AT2G25625	TCV > Mock > NES	0	5.61602	3.68802	3148.64	2635.96	1649.29	74.8769	7.09347	69.5745	161.297	116.58	298.877
AT1G64360	TCV > Mock = NES	0	4.77069	3.68562	14794.5	11776.1	8074.71	569.519	159.603	540.03	716.194	568.516	1407.8
AT3G10020	TCV > Mock > NES	0	5.0969	3.65045	2845.17	1727.84	2527.08	61.263	89.8506	56.3222	201.621	133.991	229.778
AT3G13433	TCV > Mock > NES	0	10.4586	3.63793	715.957	343.782	578.866	1.1345	0	0	92.9212	21.1963	17.4831
AT5G50760	TCV > Mock > NES	0	6.20136	3.6267	155.173	118.761	100.59	3.4035	0	1.65653	18.4089	6.05609	5.82769
AT5G38350	TCV > Mock > NES	0	14.4533	3.62664	225.885	225.021	222.057	0	0	0	9.64276	34.8225	9.99033
AT1G14870	TCV > Mock > NES	0	5.75762	3.61944	6089.07	3000.28	4192.51	140.678	56.7478	48.0395	568.046	336.113	176.496
AT1G10540	TCV > Mock = NES	0	4.3301	3.61536	256.33	208.948	172.711	11.345	7.09347	13.2523	9.64276	17.4113	24.9758
AT3G22620	TCV > Mock > NES	0	12.0038	3.61187	39.2843	54.4694	29.4178	0	0	0	2.62984	0.757011	6.66022
AT5G67310	TCV > Mock > NES	0	15.2951	3.60948	548.072	296.486	361.554	0	0	0	60.4864	24.9814	13.3204
AT3G57680	TCV > Mock > NES	0	4.25026	3.60654	1982.88	1507.28	1766.02	125.929	42.5608	107.675	130.616	105.225	195.644
AT1G57570	TCV > Mock = NES	0	7.2425	3.60018	54.9981	68.7564	59.7846	0	1.18225	0	0.876615	7.57011	6.66022
AT3G04060	TCV > Mock > NES	0	5.98602	3.59641	2100.73	1489.42	1628.42	22.69	24.8272	34.7872	130.616	139.29	161.51
AT1G13990	TCV > Mock > NES	0	6.23557	3.58964	4187.71	3683.38	3246.4	57.8595	44.9253	44.7264	276.134	212.72	434.579
AT3G57950	TCV > Mock > NES	0	8.12417	3.58705	2514.2	2929.74	2758.63	15.883	3.54674	9.93921	149.901	168.814	363.815
AT3G03470	TCV > Mock > NES	0	4.98511	3.58581	16135.1	16938.2	12719.9	588.805	394.87	462.173	1180.8	828.927	1804.09
AT5G59780	TCV > Mock > NES	0	4.80338	3.58129	8175.07	10464.4	7410.44	446.993	209.257	276.641	437.431	553.375	1185.52
AT1G14860	TCV > Mock = NES	0	4.91365	3.56997	138.477	75.8999	118.62	2.269	7.09347	1.65653	6.1363	14.3832	7.49275
AT1G13530	TCV > Mock > NES	0	14.9214	3.56874	232.76	413.431	284.688	0	0	0	43.8307	20.4393	14.153
AT1G79450	TCV > Mock > NES	0	6.25772	3.56235	416.414	410.753	354.912	4.538	5.91123	4.9696	17.5323	32.5515	49.9517
AT4G39610	TCV > Mock = NES	0	11.3837	3.55453	32.4096	25.8953	21.8261	0	0	0	2.62984	0	4.16264
AT1G08940	TCV > Mock = NES	0	3.14479	3.54655	751.313	675.063	543.755	63.532	86.3039	72.8875	66.6227	46.1777	55.7793
AT3G12500	TCV > Mock = NES	0	4.20932	3.53619	351.595	532.192	357.758	7.94149	17.7337	41.4134	32.4347	37.0936	37.4637
AT5G23230	TCV > Mock = NES	0	3.36339	3.52955	212.135	274.133	194.537	24.959	13.0047	28.1611	21.9154	12.8692	24.1433
AT3G25870	TCV > Mock = NES	0	3.77016	3.52622	849.524	485.76	583.611	53.3215	34.2851	53.0091	43.8307	46.9347	75.76
AT2G40435	TCV > NES > Mock	0	2.43725	3.51959	679.619	809.004	543.755	120.257	165.514	89.4529	31.5581	59.0469	86.5829
AT4G20110	TCV > Mock > NES	0	7.59836	3.51734	6730.39	8983.87	6373.22	52.187	7.09347	54.6656	568.923	462.534	897.465
AT3G51860	TCV > Mock > NES	0	9.87602	3.51706	20660.6	24089.7	14354.9	12.4795	18.9159	31.4742	1179.92	1518.56	2464.28
AT4G14630	TCV > Mock > NES	0	12.5448	3.51491	2711.6	2132.34	2114.29	1.1345	0	0	455.84	137.019	15.818
AT1G32960	TCV > Mock > NES	0	7.44668	3.5133	1900.38	3102.97	1988.07	26.0935	10.6402	3.31307	348.016	138.533	125.712
AT1G65610	TCV > Mock > NES	0	15.9093	3.50999	482.215	720.603	643.396	0	0	0	76.2655	66.617	19.1481
AT3G10815	TCV > Mock > NES	0	8.48468	3.50311	2020.2	1382.27	1757.48	6.80699	5.91123	1.65653	253.342	130.963	70.7648
AT1G21310	TCV > Mock > NES	0	8.94426	3.48915	16455.1	19124.1	8696.27	45.38	21.2804	23.1915	1290.37	1074.96	1577.64
AT3G10985	TCV > NES > Mock	0	2.06538	3.47382	9740.55	7915.92	6637.98	2141.93	2011	1651.57	568.046	716.133	902.46
AT4G18430	TCV > Mock = NES	0	4.33783	3.47163	268.116	270.561	196.435	13.614	9.45796	13.2523	33.3114	20.4393	12.4879
AT4G08290	TCV > NES > Mock	0	1.79168	3.4575	740.51	645.596	457.399	257.531	82.7572	192.158	35.9412	21.9533	109.894
AT2G17710	TCV > Mock = NES	0	2.75553	3.42923	2222.51	1370.66	1587.61	299.508	242.36	225.289	115.713	127.935	237.27
AT2G44790	TCV > Mock = NES	0	3.62269	3.42624	198.386	233.057	211.618	2.269	28.3739	21.535	21.0388	20.4393	18.3156
AT5G39610	TCV > Mock > NES	0	8.18956	3.42446	746.402	677.742	599.744	4.538	2.36449	0	71.0058	40.8786	76.5925
AT5G53110	TCV > Mock > NES	0	5.90057	3.42382	914.343	497.368	737.343	11.345	13.0047	11.5957	72.759	57.5329	69.9323
AT4G04500	TCV > Mock > NES	0	9.10993	3.41745	4940.01	2376.11	2997.77	6.80699	3.54674	8.28267	383.957	314.917	266.409
AT4G18930	TCV > Mock = NES	0	3.8172	3.40426	3147.66	2112.7	2115.23	173.578	152.51	197.128	198.115	210.449	288.055
AT5G14160	TCV > Mock = NES	0	11.5428	3.40391	31.4275	27.6812	30.3668	0	0	0	3.50646	0.757011	4.16264
AT3G13950	TCV > Mock > NES	0	9.40168	3.40122	7430.63	4991.54	4936.5	9.07599	8.27572	8.28267	585.579	541.263	516.167
AT1G13700	TCV > Mock > NES	0	4.94205	3.39914	380.076	238.415	382.431	19.2865	8.27572	4.9696	43.8307	31.0375	19.9807
AT4G10720	TCV > Mock > NES	0	13.0426	3.37623	81.515	93.7587	77.8148	0	0	0	7.01292	9.84115	7.49275
AT1G44130	TCV > Mock > NES	0	8.27835	3.37546	2209.74	1351.02	1602.8	4.538	7.09347	4.9696	305.939	107.496	84.0853
AT5G01640	TCV > Mock = NES	0	2.98565	3.37511	373.201	319.673	298.923	43.111	47.2898	34.7872	32.4347	34.8225	28.3059
AT5G15130	TCV > Mock > NES	0	6.69593	3.37438	120.799	210.734	137.599	0	1.18225	3.31307	24.5452	18.1683	2.49758
AT1G66700	TCV > Mock > NES	0	10.8483	3.35165	4559.93	4717.4	3248.29	2.269	1.18225	3.31307	520.709	322.487	383.795
AT5G26920	TCV > Mock > NES	0	4.19962	3.34944	32708.1	25712.2	26598.4	2090.88	1147.96	1388.18	3744.9	2679.06	1917.31
AT1G02610	TCV > Mock > NES	0	5.62355	3.34409	385.969	239.308	355.86	0	8.27572	11.5957	60.4864	13.6262	22.4782
AT4G24000	TCV > Mock > NES	0	7.91193	3.34239	1466.29	1619.79	1353.22	6.80699	0	11.5957	150.778	137.019	149.855
AT1G74590	TCV > Mock > NES	0	6.96524	3.33787	2325.63	2156.45	1726.16	22.69	15.3692	11.5957	333.99	122.636	157.348
AT2G33080	TCV > Mock > NES	0	9.82117	3.33555	1688.24	2277.89	1582.87	1.1345	0	4.9696	96.4276	155.187	298.045
AT1G15310	TCV > Mock > NES	0	4.79202	3.32556	556.856	667.919	472.583	28.3625	21.2804	11.5957	63.9929	54.5048	50.7842
AT1G53620	TCV > Mock > NES	0	15.3827	3.31351	522.482	362.534	396.666	0	0	0	63.1163	24.9814	40.7938
AT3G26290	TCV > Mock > NES	0	4.42493	3.3046	10761.9	6896.18	7149.47	436.782	154.874	563.222	849.44	697.207	964.067
AT5G35732	TCV > NES > Mock	0	1.60053	3.30141	80.5329	67.8635	64.5294	23.8245	16.5514	29.8176	10.5194	6.05609	4.99517
AT1G45145	TCV > Mock > NES	0	5.61399	3.28806	20152.9	19442.9	16885.8	561.577	238.814	352.842	1501.64	1545.82	2734.85
AT3G21080	TCV > Mock > NES	0	7.37639	3.27477	1958.32	1659.08	1440.52	7.94149	14.1869	8.28267	209.511	141.561	171.501
AT3G04000	TCV > NES > Mock	0	2.40839	3.27208	382.04	637.559	454.552	100.97	108.767	67.9179	61.363	37.0936	54.1143
AT3G13672	TCV > Mock > NES	0	4.83532	3.22868	418.378	395.573	249.577	14.7485	5.91123	16.5653	49.0904	22.7103	41.6264
AT5G01900	TCV > Mock > NES	0	7.77212	3.22311	415.432	221.449	238.189	1.1345	1.18225	1.65653	7.01292	57.5329	29.1385
AT5G17650	TCV > Mock = NES	0	2.90527	3.20364	1303.26	852.758	780.046	152.023	112.313	127.553	98.1809	76.4581	144.027
AT2G48010	TCV > Mock = NES	0	3.26749	3.19506	1227.64	1081.35	1093.2	114.584	102.855	135.836	130.616	105.982	134.869
AT5G64120	TCV > Mock = NES	0	3.5457	3.18921	1785.47	1563.54	1240.29	142.947	140.687	109.331	289.283	151.402	62.4396
AT4G21920	TCV > Mock > NES	0	5.11954	3.18893	109.014	126.798	82.5596	2.269	3.54674	3.31307	14.9025	8.32712	11.6554
AT4G27410	TCV > Mock > NES	0	4.81454	3.18387	2188.14	2622.57	1546.81	122.526	52.0188	51.3526	311.198	154.43	233.94
AT3G14280	TCV > Mock > NES	0	7.37065	3.17639	3417.74	3217.26	2394.23	24.959	13.0047	16.5653	213.017	185.468	600.252
AT5G16360	TCV > Mock = NES	0	3.23207	3.1608	1652.89	1208.15	1406.36	195.134	151.327	107.675	124.479	195.309	157.348
AT5G48400	TCV > Mock > NES	0	9.56875	3.14834	3337.2	4286.11	3534.88	5.6725	2.36449	6.62614	745.123	236.945	276.399
AT5G44480	TCV > Mock = NES	0	2.70286	3.13727	395.79	384.857	268.556	77.1459	42.5608	41.4134	33.3114	31.7945	54.1143
AT3G43930	TCV > Mock = NES	0	11.0399	3.12635	21.6064	18.7517	22.7751	0	0	0	1.75323	3.78506	1.66506
AT1G14780	TCV > Mock > NES	0	4.50192	3.12427	384.004	311.636	229.649	24.959	5.91123	9.93921	49.0904	37.8506	19.1481
AT3G51440	TCV > Mock > NES	0	8.20924	3.12202	3557.2	3675.34	2922.8	17.0175	10.6402	6.62614	287.53	294.477	584.434
AT1G29395	TCV > NES > Mock	0	2.42918	3.11469	4218.16	4062.3	2999.67	834.991	358.22	901.155	514.989	253.599	533.65
AT4G36030	TCV > NES > Mock	0	1.94817	3.11253	1490.84	1636.76	1485.12	365.309	429.155	400.881	220.907	190.01	122.382
AT4G34230	TCV > Mock = NES	0	2.81108	3.10811	7011.27	5011.18	4386.1	640.992	832.301	864.711	565.417	570.787	766.758
AT1G13830	TCV > Mock > NES	0	6.231	3.10271	327.042	450.042	283.739	7.94149	1.18225	4.9696	28.9283	28.7664	65.7697
AT1G20350	TCV > Mock > NES	0	5.8076	3.10187	923.182	550.944	691.793	14.7485	10.6402	13.2523	120.096	68.888	63.2721
AT1G47890	TCV > Mock > NES	0	11.406	3.10125	1619.5	1693.91	1263.07	0	0	1.65653	179.706	152.916	200.639
AT1G65690	TCV > Mock > NES	0	5.63472	3.10083	4203.42	4038.77	3543.42	113.45	42.5608	81.1702	483.891	426.954	462.885
AT2G27830	TCV > Mock = NES	0	2.71684	3.10076	2261.8	1374.24	1516.44	255.262	276.645	251.793	168.31	198.337	233.94
AT1G67865	TCV > NES > Mock	0	1.88994	3.08859	13792.7	14805	10909.3	3550.98	3376.49	3732.17	1531.45	1218.79	1894
AT1G05000	TCV > Mock > NES	0	5.2647	3.08094	489.09	548.265	371.044	12.4795	14.1869	9.93921	49.0904	75.7011	41.6264
AT5G27350	TCV > NES > Mock	0	2.25829	3.07989	6039.97	5058.51	5563.76	1192.36	1331.21	959.134	681.13	652.544	636.884
AT5G46050	TCV > Mock > NES	0	6.57027	3.07353	2231.35	1297.44	1642.65	22.69	11.8225	19.8784	187.596	254.356	172.333
AT1G66960	TCV > Mock > NES	0	9.30294	3.07054	6416.11	2562.74	4873.87	7.94149	2.36449	11.5957	288.406	465.562	894.967
AT5G25260	TCV > Mock > NES	0	9.45413	3.0704	3898.17	2985.8	2689.68	7.94149	2.36449	3.31307	568.923	382.456	188.307
AT3G13450	TCV > Mock = NES	0	2.68224	3.06947	2860.88	3227.98	2557.45	446.993	444.524	455.547	405.873	278.58	345.499
AT3G60966	TCV > Mock > NES	0	6.72931	3.06654	767.027	596.484	491.562	6.80699	2.36449	8.28267	71.0058	69.645	80.7552
AT5G07100	TCV > Mock > NES	0	5.72955	3.06401	1223.71	893.833	987.869	31.766	11.8225	14.9088	198.115	108.253	64.9371
AT2G26390	TCV > Mock > NES	0	4.01991	3.05977	405.611	320.566	280.893	31.766	7.09347	23.1915	35.0646	42.3926	43.2914
AT1G26930	TCV > Mock > NES	0	4.43662	3.05606	690.422	568.803	529.52	27.228	35.4674	19.8784	75.3889	85.5423	54.1143
AT1G01070	TCV > Mock = NES	0	2.50019	3.05486	131.603	125.905	146.14	24.959	24.8272	21.535	9.64276	10.5982	28.3059
AT5G17860	TCV > Mock > NES	0	6.04484	3.03155	3644.6	3136.9	2751.99	87.3564	18.9159	38.1003	360.289	386.833	418.761
AT3G28510	TCV > Mock > NES	0	14.6854	3.02013	17357.8	14337	12741.7	0	0	1.65653	884.504	2111.3	2481.76
AT2G41380	TCV > Mock > NES	0	4.89524	3.01762	2240.19	1746.59	1585.71	80.5494	60.2945	46.383	248.082	204.393	235.605
AT3G51960	TCV > NES > Mock	0	2.08105	3.00625	1528.16	1565.32	1371.25	445.858	331.029	278.298	182.336	188.496	184.821
AT4G36990	TCV > Mock = NES	0	3.17141	2.99849	13228	8352.56	8856.66	1272.91	796.833	1308.66	1365.77	924.311	1518.53
AT1G73810	TCV > Mock > NES	0	5.11898	2.99218	742.474	537.55	597.846	31.766	2.36449	19.8784	120.096	65.103	50.7842
AT1G08310	TCV > Mock = NES	0	3.44613	2.98624	123.746	108.046	101.539	10.2105	7.09347	13.2523	9.64276	17.4113	14.9855
AT2G31110	TCV > Mock = NES	0	3.01601	2.98518	2678.21	2128.77	2378.1	263.204	275.463	349.529	215.647	243.001	448.732
AT5G46180	TCV > Mock > NES	0	3.40505	2.98314	8491.31	8161.47	6991.95	796.418	670.333	765.319	1039.67	834.226	1116.42
AT1G72060	TCV > Mock > NES	0	5.42018	2.97608	3907.76	2311.63	2345.77	91.8944	48.4721	59.6353	530.352	286.907	271.256
AT4G19370	TCV > Mock > NES	0	4.98418	2.96847	710.064	567.91	471.634	19.2865	9.45796	26.5046	63.1163	69.645	90.7455
AT5G64430	TCV > Mock > NES	0	4.27584	2.96593	5304.37	4953.14	4978.25	263.204	215.169	308.115	652.201	627.562	670.185
AT3G24982	TCV > Mock > NES	0	7.00802	2.96507	730.568	908.531	491.384	10.7085	2.38814	3.42571	43.7527	57.0734	171.984
AT4G19700	TCV > Mock > NES	0	3.75504	2.96084	2514.2	2279.68	2094.36	179.251	195.07	135.836	305.939	324.001	254.753
AT2G07718	TCV > Mock = NES	0	2.38411	2.95722	442.644	309.58	298.926	46.5122	55.4331	99.3921	46.4623	35.578	53.2818
AT3G50840	TCV > NES > Mock	0	1.57579	2.9419	667.834	536.657	446.961	212.151	159.603	182.219	102.564	42.3926	69.9323
AT3G50770	TCV > Mock > NES	0	9.51791	2.94099	9473.42	7576.6	7657.17	14.7485	10.6402	8.28267	676.747	979.573	1560.99
AT1G76960	TCV > Mock > NES	0	8.18358	2.93812	11215.7	10540.3	6603.82	60.1285	5.91123	31.4742	582.949	622.263	2495.09
AT1G69490	TCV > Mock > NES	0	4.34816	2.93117	5337.76	4614.72	4553.12	302.911	152.51	256.763	640.805	629.076	631.888
AT2G36540	TCV > Mock = NES	0	3.51345	2.92271	40.2664	51.7905	46.4991	4.538	5.91123	1.65653	6.1363	3.78506	8.32528
AT5G38900	TCV > Mock > NES	0	8.37158	2.92142	2012.34	1667.12	1359.86	4.538	2.36449	8.28267	281.393	167.3	216.457
AT4G15280	TCV > Mock > NES	0	6.01888	2.91584	187.583	133.941	155.63	5.6725	0	1.65653	21.0388	28.0094	14.153
AT3G26440	TCV > Mock > NES	0	8.40456	2.90981	2444.47	2968.13	2067.79	4.538	5.91123	11.5957	297.172	261.926	436.244
AT3G26840	TCV > Mock > NES	0	5.25387	2.90946	7256.8	8628.48	5974.66	268.876	121.771	182.219	854.699	683.581	1371.17
AT1G48260	TCV > Mock = NES	0	2.59873	2.90821	1064.61	710.78	764.863	130.467	101.673	187.188	137.629	90.8414	109.894
AT1G07590	TCV > Mock = NES	0	2.49466	2.90752	72467.1	62923	52338.9	14545.2	8698.95	10065.1	7360.88	6706.21	10952.6
AT1G01180	TCV > Mock = NES	0	3.17662	2.90725	923.182	768.822	690.844	78.2804	79.2104	106.018	129.739	94.6264	93.2431
AT5G63750	TCV > Mock > NES	0	7.86732	2.90696	239.634	118.761	178.405	2.269	0	0	28.9283	23.4674	19.1481
AT4G27480	TCV > Mock > NES	0	5.12852	2.90304	1316.03	897.405	1124.52	43.111	22.4627	29.8176	106.07	128.692	211.462
AT3G15534	TCV > Mock > NES	0	7.98346	2.90159	227.849	170.552	195.486	1.1345	1.18225	0	34.188	13.6262	31.636
AT5G11210	TCV > Mock > NES	0	17.072	2.89652	1556.64	1234.94	1341.83	0	0	0	384.834	104.468	65.7697
AT5G01820	TCV > Mock = NES	0	2.89306	2.89512	11637	10736.7	9436.47	1538.38	1257.91	1485.91	1378.92	1535.98	1361.18
AT4G04460	TCV > NES > Mock	0	1.7979	2.87904	430.164	706.316	663.324	161.099	164.332	192.158	73.6356	88.5703	82.4202
AT5G49700	TCV > Mock > NES	0	4.26459	2.87681	355.523	269.668	450.757	19.2865	20.0982	16.5653	46.4606	74.1871	25.8084
AT3G29250	TCV > Mock > NES	0	17.3919	2.87572	2161.62	1421.56	1576.22	0	0	0	376.068	203.636	123.214
AT5G02490	TCV > Mock = NES	0	3.81981	2.85529	30027	17332	23513.4	1696.08	1503.82	1818.88	2948.06	2656.35	4189.28
AT1G10340	TCV > Mock > NES	0	5.43754	2.84505	8606.22	6399.7	6649.37	199.672	94.5796	205.41	1050.18	1012.88	950.746
AT2G17430	TCV > Mock > NES	0	3.52943	2.83297	657.031	984.02	806.617	72.6079	53.201	86.1398	134.122	104.468	104.898
AT5G02230	TCV > NES > Mock	0	2.02981	2.82399	3345.06	2970.81	2504.31	774.863	598.216	786.854	438.307	328.543	478.703
AT2G45570	TCV > Mock > NES	0	9.84066	2.82223	1996.63	1539.43	1780.25	3.4035	2.36449	0	445.32	175.627	130.707
AT1G73750	TCV > Mock = NES	0	2.50296	2.81457	1008.63	700.958	719.313	187.192	125.318	115.957	113.083	101.44	130.707
AT3G48630	TCV > Mock > NES	0	4.35748	2.81108	128.656	116.082	87.3044	9.07599	7.09347	0	13.1492	16.6542	17.4831
AT5G16910	TCV > Mock = NES	0	2.99082	2.80702	6376.83	4346.83	5058.91	705.658	641.959	637.766	813.499	778.965	662.692
AT5G63905	TCV > Mock = NES	0	2.50209	2.80532	577.48	428.611	434.624	99.8359	89.8506	64.6049	71.8824	48.4487	85.7503
AT5G65600	TCV > Mock > NES	0	5.55463	2.79932	156.155	241.094	137.599	5.6725	2.36449	3.31307	40.3243	18.1683	18.3156
AT3G56500	TCV > Mock = NES	0	6.03605	2.79928	33.3917	39.2894	37.9585	0	0	1.65653	7.01292	3.02805	5.82769
AT5G14000	TCV > Mock > NES	0	5.2363	2.79292	250.438	195.554	187.894	5.6725	9.45796	1.65653	27.1751	40.1216	24.1433
AT2G35070	TCV > Mock > NES	0	14.4034	2.79229	164.994	300.028	185.047	0	0	0	63.9929	18.1683	11.6554
AT5G64240	TCV > NES > Mock	0	1.73742	2.77883	2343.31	1808.2	1442.42	538.887	572.207	566.535	234.056	267.982	313.03
AT3G26280	TCV > Mock > NES	0	5.88432	2.77316	7351.08	6127.36	5347.4	138.409	62.659	117.614	1221.12	658.6	874.154
AT5G63850	TCV > NES > Mock	0	1.3146	2.77286	6026.22	5830.01	4819.77	2274.67	1828.93	2600.76	505.807	632.861	1301.24
AT5G05110	TCV > Mock = NES	0	2.9127	2.76793	3904.86	3035.1	3068.94	507.121	407.875	414.134	461.976	416.356	591.095
AT4G32940	TCV > Mock > NES	0	3.70436	2.76571	50606.1	47985.7	49474.1	4805.74	2829.11	3723.89	5434.13	5657.9	10679.7
AT3G26230	TCV > Mock = NES	0	2.45939	2.75017	4744.57	4074.49	3678.17	825.915	614.768	831.58	546.131	549.59	761.763
AT3G24900	TCV > Mock > NES	0	9.05927	2.74994	2247.43	1799.75	1646.08	5.6725	0	4.9696	170.942	251.147	424.23
AT4G11360	TCV > Mock > NES	0	3.97826	2.74982	1627.35	984.913	1207.08	81.6839	74.4815	86.1398	177.076	164.271	226.447
AT3G27210	TCV > NES > Mock	0	1.62654	2.74644	1681.37	1687.66	1125.47	675.027	457.529	323.024	211.264	227.86	230.61
AT3G61990	TCV > Mock = NES	0	3.30705	2.74622	858.363	1157.25	692.742	85.0874	95.7619	92.766	130.616	100.683	172.333
AT3G12510	TCV > Mock = NES	0	2.94771	2.73931	294.633	437.541	305.566	36.304	40.1963	57.9787	56.98	56.7758	41.6264
AT4G15530	TCV > Mock = NES	0	3.20075	2.7381	25830.4	25393.4	20889.5	2869.15	612.403	4361.66	3066.4	2416.38	5325.68
AT3G28100	TCV > Mock = NES	0	2.7108	2.73761	2887.4	2522.56	2070.63	383.461	316.842	442.295	314.705	274.038	532.822
AT1G03620	TCV > Mock > NES	0	3.90192	2.73339	107.05	160.729	121.467	5.6725	15.3692	4.9696	21.0388	16.6542	20.8132
AT4G28390	TCV > Mock > NES	0	5.25493	2.72688	6726.46	4495.95	5298.05	129.333	119.407	183.875	643.435	704.778	1147.22
AT1G27290	TCV > NES > Mock	0	2.30344	2.72609	2921.77	2433.26	2724.47	658.01	649.053	329.65	334.867	405.001	481.201
AT3G45390	TCV > Mock > NES	0	12.5024	2.72479	57.9444	70.5423	45.5501	0	0	0	5.25969	6.05609	14.9855
AT4G25390	TCV > Mock = NES	0	2.52126	2.72474	2027.07	1442.1	1482.28	310.853	293.197	258.419	294.543	276.309	178.161
AT5G16370	TCV > Mock > NES	0	3.28395	2.71973	3887.67	3574.18	3623.03	421.219	359.581	357.232	696.143	520.13	466.411
AT2G41250	TCV > Mock = NES	0	2.78364	2.71427	15802.1	15915.8	14988.8	1949.07	3497.08	1336.82	2798.15	2088.59	2230.34
AT5G07440	TCV > Mock = NES	0	2.55596	2.71171	3474.7	2202.88	2303.13	449.262	487.085	420.76	392.723	404.244	421.259
AT4G09030	TCV > Mock = NES	0	2.61708	2.71153	3323.46	2171.63	3774.01	501.449	494.179	515.182	414.639	486.758	513.669
AT5G45800	TCV > Mock = NES	0	2.37313	2.70998	8176.05	6615.79	6469.07	1321.69	1211.8	1570.4	916.062	937.937	1395.32
AT1G09740	TCV > Mock = NES	0	2.26848	2.7087	1215.85	986.699	929.033	224.631	228.173	197.128	154.284	158.215	166.506
AT4G27470	TCV > Mock = NES	0	2.53042	2.70611	804.347	827.756	735.623	129.333	111.249	169.218	142.012	123.393	97.4057
AT1G55265	TCV > Mock = NES	0	2.97925	2.70356	1774.67	1604.61	1216.57	186.058	163.15	233.571	207.758	201.365	296.38
AT5G47560	TCV > Mock = NES	0	2.706	2.70267	18703.3	22464.6	16169.4	2663.8	3028.91	3094.41	3644.09	2311.16	2852.24
AT4G18360	TCV > Mock > NES	0	7.20442	2.70169	581.408	584.876	414.696	4.538	1.18225	4.9696	89.4147	62.8319	90.7455
AT2G22680	TCV > Mock = NES	0	2.15315	2.69504	66.7834	112.51	98.692	21.5555	26.0094	14.9088	19.2855	13.6262	9.99033
AT3G21520	TCV > Mock > NES	0	5.05414	2.69496	223.921	181.267	271.403	11.345	2.36449	6.62614	71.0058	15.1402	18.3156
AT1G77145	TCV > NES > Mock	0	1.53024	2.68878	271.062	288.343	253.373	97.5669	74.4815	109.331	43.8307	35.5795	46.6215
AT5G45380	TCV > Mock > NES	0	5.3704	2.68509	9822.07	9175.85	8655.48	287.028	48.4721	332.964	1010.74	1095.4	2193.71
AT1G53560	TCV > NES > Mock	0	2.05184	2.68158	2225.46	1995.72	1859.96	561.577	461.076	443.951	359.412	285.393	303.04
AT1G21920	TCV > Mock = NES	0	2.58476	2.67974	4035.48	3184.23	3517.8	498.045	673.88	617.887	575.059	499.627	601.085
AT5G18630	TCV > Mock = NES	0	2.2389	2.66878	2369.53	1674.34	1854.85	455.525	411.421	382.66	285.243	302.049	340.315
AT5G63800	TCV > Mock = NES	0	2.24274	2.66402	7289.21	5143.34	4612.9	1217.32	985.993	1398.12	1190.44	755.497	743.447
AT4G04972	TCV > Mock > NES	0	5.60204	2.66269	93.3003	83.0435	77.8148	0	3.54674	1.65653	10.5194	3.78506	25.8084
AT2G25000	TCV > Mock > NES	0	3.6163	2.65794	2477.86	2969.03	2017.49	212.151	159.603	236.884	271.751	290.692	620.233
AT1G05805	TCV > Mock = NES	0	2.69294	2.65386	1900.38	1427.81	1597.1	283.625	274.281	203.754	205.128	245.272	332.178
AT1G54100	TCV > Mock > NES	0	3.60391	2.64835	17350.9	14295.1	13567.3	1209.38	1074.66	1434.56	2841.11	1863.76	2506.74
AT4G39955	TCV > Mock > NES	0	3.49077	2.64691	1939.66	2097.52	1642.65	173.578	156.056	175.593	222.66	252.085	432.082
AT2G34500	TCV > Mock > NES	0	16.0485	2.64629	754.259	546.479	732.598	0	0	0	189.349	52.9908	82.4202
AT1G20440	TCV > NES > Mock	0	1.54403	2.63762	15693.1	10209	11819.3	4676.41	5042.28	3216.99	1991.67	1797.9	2271.97
AT2G22860	TCV > Mock = NES	0	2.41859	2.63634	554.891	393.787	469.736	141.812	80.3927	43.0699	76.2655	80.2432	71.5974
AT1G64561	TCV > Mock = NES	0	2.81142	2.62395	106.068	161.622	111.977	19.2865	16.5514	18.2219	20.1621	18.9253	22.4782
AT1G35515	TCV > NES > Mock	0	1.518	2.61046	87.4077	82.1505	71.1721	43.111	17.7337	23.1915	15.7791	5.29908	18.3156
AT5G56230	TCV > Mock = NES	0	2.33213	2.60651	119.817	181.267	156.579	27.228	27.1916	36.4438	26.2984	28.0094	20.8132
AT1G62810	TCV > Mock > NES	0	4.32284	2.60368	4479.4	4686.15	4054.91	231.438	169.061	260.076	724.96	611.665	838.355
AT4G38870	TCV > Mock > NES	0	7.724	2.60364	381.058	433.076	292.28	0	3.54674	1.65653	80.6486	68.888	32.4686
AT2G28400	TCV > NES > Mock	0	1.64284	2.60363	3277.3	2770.79	2511.9	1127.69	912.693	700.714	526.845	494.328	387.125
AT1G14890	TCV > Mock = NES	0	2.35505	2.60265	451.77	447.363	511.49	80.5494	104.038	91.1094	84.155	93.1124	54.9468
AT1G12240	TCV > NES > Mock	0	1.6853	2.5975	20126.3	14715.7	20091.4	7071.33	4746.72	5262.81	2764.84	2719.94	3591.52
AT3G51730	TCV > Mock = NES	0	2.42926	2.5937	30163.5	23595.9	24301.9	5080.29	4310.47	5102.13	4292.78	3390.65	5248.25
AT5G51070	TCV > Mock = NES	0	3.07765	2.5928	30909.9	26431.9	22132.6	3799.44	2224.99	3389.27	4704.79	3314.95	5154.18
AT2G39350	TCV > Mock = NES	0	2.08147	2.58725	139.459	219.663	185.996	58.994	36.6496	33.1307	16.6557	42.3926	31.636
AT2G36770	TCV > Mock > NES	0	6.58843	2.58674	302.089	194.933	224.898	2.269	3.54674	1.65653	93.1771	13.2189	13.7509
AT3G07350	TCV > Mock = NES	0	3.3467	2.58642	109.996	120.547	123.365	5.6725	22.4627	6.62614	22.792	30.2805	5.82769
AT3G46690	TCV > Mock > NES	0	7.16375	2.58496	525.428	409.86	472.583	3.4035	4.72898	1.65653	157.791	47.6917	29.1385
AT1G30220	TCV > Mock > NES	0	5.77117	2.58311	516.589	488.438	605.437	19.2865	3.54674	6.62614	78.8953	83.2712	106.564
AT1G14200	TCV > NES > Mock	0	2.02738	2.57417	2064.39	1677.83	1976.69	435.648	566.296	400.881	213.894	312.646	433.747
AT2G45830	TCV > Mock = NES	0	2.38638	2.57165	162.048	150.907	174.609	27.228	29.5561	36.4438	28.9283	27.2524	25.8084
AT5G58650	TCV > NES > Mock	0	1.8799	2.57135	1121.57	770.608	975.532	351.695	210.44	217.006	182.336	146.103	154.018
AT1G30900	TCV > Mock > NES	0	4.33004	2.5647	5062.77	6031.81	4332.96	281.356	205.711	279.954	540.871	730.516	1336.21
AT5G19140	TCV > Mock = NES	0	2.58196	2.56236	47563.5	32076.2	35671.5	7922.21	5725.61	5610.68	5625.24	4797.18	9099.53
AT2G33150	TCV > Mock > NES	0	3.40611	2.55559	33280.7	27259.7	25559.3	2763.64	2412.96	2945.32	5016.87	3913.75	5714.47
AT1G02470	TCV > Mock > NES	0	5.74743	2.55553	2472.95	2317.18	1664.48	56.725	31.9206	31.4742	345.386	342.926	409.604
AT3G11570	TCV > Mock = NES	0	3.22954	2.55189	347.666	358.962	364.401	52.187	35.4674	26.5046	53.4735	57.5329	71.6132
AT4G31240	TCV > Mock = NES	0	2.57538	2.52303	901.576	655.418	819.903	117.988	146.598	134.179	106.947	148.374	158.18
AT3G58710	TCV > Mock = NES	0	2.21623	2.5227	156.155	154.479	119.569	37.4385	23.6449	31.4742	23.6686	29.5234	21.6457
AT1G58030	TCV > Mock = NES	0	2.33654	2.51945	8635.68	6881.89	6980.56	1603.05	1304.02	1547.2	1292.13	1167.31	1464.42
AT4G15417	TCV > Mock > NES	0	7.19183	2.51926	202.314	193.768	182.201	2.269	0	1.65653	41.2009	28.0094	31.636
AT5G58350	TCV > Mock > NES	0	3.29567	2.51731	7867.67	7450.69	6680.69	921.213	568.66	750.41	1405.21	1246.8	1190.51
AT1G78310	TCV > Mock > NES	0	3.52131	2.51419	609.889	550.051	519.082	49.918	36.6496	59.6353	113.96	90.8414	89.0804
AT2G20920	TCV > Mock = NES	0	1.86071	2.51116	4795.64	3628.02	3070.84	1133.36	972.988	1058.53	701.292	571.544	743.447
AT3G55430	TCV > NES > Mock	0	1.79768	2.50485	5687.39	4628.11	5057.01	1435.14	1656.33	1330.2	996.711	909.928	801.724
AT4G39860	TCV > NES > Mock	0	1.83588	2.50178	1725.56	1309.05	1331.39	420.899	457.529	344.559	207.758	272.524	290.552
AT1G56550	TCV > Mock > NES	0	4.80778	2.49189	466.502	465.222	477.328	19.2865	9.45796	21.535	54.3501	87.0563	109.061
AT2G32140	TCV > Mock > NES	0	4.2504	2.49019	4172.98	2512.74	2864.91	255.262	87.4862	159.027	663.597	470.104	566.119
AT4G19420	TCV > NES > Mock	0	1.52592	2.48796	5324.99	5030.83	6009.77	2186.18	1784.01	1712.86	666.227	869.049	1382
AT5G40010	TCV > Mock > NES	0	6.74695	2.48448	299.543	445.577	350.167	5.6725	1.18225	3.31307	89.4147	69.645	36.6312
AT2G19190	TCV > Mock > NES	0	9.58702	2.48137	1160.85	1699.27	985.022	0	0	4.9696	346.263	149.131	193.146
AT5G53030	TCV > Mock = NES	0	2.07283	2.47882	339.81	241.094	271.403	87.3564	47.2898	67.9179	44.7074	50.7198	57.4444
AT3G55560	TCV > Mock > NES	0	3.71269	2.47864	1091.12	950.981	888.228	56.725	100.491	66.2614	183.212	146.86	195.644
AT1G09400	TCV > Mock > NES	0	6.43255	2.47557	69.7297	79.4717	49.346	2.269	0	0	14.0258	8.32712	13.3204
AT3G45300	TCV > Mock = NES	0	2.77247	2.47171	3342.12	2393.08	2819.36	425.437	375.954	450.577	594.345	463.291	484.531
AT3G62960	TCV > Mock > NES	0	3.8284	2.46388	271.062	202.697	290.382	37.4385	4.72898	11.5957	17.5323	31.0375	89.913
AT5G38250	TCV > Mock > NES	0	6.45615	2.45774	1288.53	1320.89	1155.83	15.883	7.09347	19.8784	142.888	228.617	313.863
AT4G12290	TCV > Mock > NES	0	4.83991	2.45646	14223.9	13231.6	11714.9	638.723	160.785	568.191	2332.67	1959.15	2844.75
AT2G31390	TCV > Mock = NES	0	2.74923	2.4536	4092.45	3179.76	3288.15	479.893	539.104	551.626	480.385	554.132	893.302
AT3G19580	TCV > NES > Mock	0	1.54177	2.44328	4336.99	3422.64	3278.66	1823.14	982.446	985.638	896.777	637.404	495.354
AT2G25450	TCV > Mock = NES	0	3.25722	2.44175	18537.3	14473.7	12035.7	2208.87	1013.18	1489.22	2933.15	2545.83	2812.28
AT5G41860	TCV > Mock = NES	0	3.06725	2.43835	179.726	186.625	130.957	23.8245	18.9159	16.5653	25.4218	19.6823	46.6215
AT2G07715	TCV > NES > Mock	0	1.67853	2.43006	141.463	98.0207	110.306	39.7075	33.1029	36.4438	15.2706	18.8367	30.7744
AT5G25140	TCV > NES > Mock	0	1.00089	2.42776	2148.32	2380.36	1862.61	1147.47	1123.89	922.302	381	291.992	514.833
AT1G13550	TCV > Mock > NES	0	4.42582	2.42536	185.619	197.34	144.242	7.94149	8.27572	8.28267	51.7203	27.2524	19.1481
AT3G52480	TCV > Mock = NES	0	2.93817	2.42472	258.295	242.88	275.199	27.228	34.2851	39.7568	48.2138	52.2338	44.124
AT1G24575	TCV > Mock = NES	0	2.79728	2.42267	846.578	545.587	749.679	93.0289	54.3833	160.684	95.551	124.907	178.993
AT3G60970	TCV > Mock > NES	0	10.7846	2.42223	665.249	800.795	636.086	1.16173	0	0	53.8715	127.221	211.072
AT2G16790	TCV > Mock > NES	0	3.08225	2.4209	334.899	324.137	278.046	46.5145	34.2851	29.8176	59.6098	62.0749	53.2818
AT3G28540	TCV > Mock > NES	0	6.62282	2.41873	12152.6	14996.9	10953.9	144.081	52.0188	190.502	1841.77	1966.72	3317.62
AT4G23200	TCV > Mock > NES	0	3.76148	2.41636	1215.85	1226.01	872.095	95.2979	66.2057	82.8267	181.459	194.552	244.763
AT5G53870	TCV > Mock > NES	0	4.46046	2.41294	1774.67	1768.02	2287	81.6839	96.9441	86.1398	283.147	336.113	475.373
AT3G17810	TCV > Mock = NES	0	2.29193	2.40889	11969.9	11881.5	9722.11	2677.42	1860.85	2317.49	1858.42	1557.93	2905.52
AT4G20260	TCV > NES > Mock	0	1.58454	2.40329	27452.9	18587.4	22666.9	6308.95	10326.9	6273.3	4101.68	3916.02	4970.19
AT3G17820	TCV > Mock = NES	0	2.51212	2.40325	5272.94	4764.73	4672.69	805.494	881.955	891.216	906.42	889.488	984.88
AT3G63010	TCV > Mock > NES	0	3.27791	2.39582	2087.96	2179.67	1716.67	277.952	150.145	188.845	348.893	386.076	402.111
AT1G32460	TCV > NES > Mock	0	1.90143	2.3936	2105.64	1544.79	1854.27	515.063	592.305	366.094	379.574	314.16	353.824
AT2G33110	TCV > Mock = NES	0	2.96791	2.39343	1656.46	2158.42	1625.54	254.596	220.749	219.978	420.123	294.146	321.177
AT3G04640	TCV > NES > Mock	0	1.10612	2.39205	3227.21	2236.82	2611.54	1479.39	1145.6	1126.44	596.975	551.861	389.623
AT4G19860	TCV > Mock = NES	0	2.41583	2.3806	7624.11	7228.35	6220.44	1413.59	1186.97	1348.42	1271.97	1203.65	1570.98
AT4G22920	TCV > Mock = NES	0	2.11524	2.37901	9117.9	7355.15	6214.75	2069.33	1557.02	1610.15	1236.9	1208.95	1915.65
AT1G69310	TCV > Mock = NES	0	2.86583	2.37683	1856.19	1985.9	1405.41	283.625	192.706	243.511	361.165	244.515	404.608
AT3G04420	TCV > Mock = NES	0	2.56561	2.37622	597.122	457.185	520.031	121.391	89.8506	54.6656	106.947	85.5423	110.726
AT5G62680	TCV > Mock = NES	0	2.918	2.37332	14792.5	10465.3	9266.61	1878.73	1224.81	1464.38	1989.04	1974.29	2699.89
AT3G29810	TCV > Mock > NES	0	3.133	2.3729	785.687	650.953	757.271	65.801	106.402	77.8571	122.726	130.963	169.836
AT1G16840	TCV > NES > Mock	0	2.03661	2.36844	2226.44	2186.81	2063.99	584.267	502.454	491.991	340.127	358.066	556.128
AT1G77660	TCV > Mock = NES	0	2.39126	2.36625	1619.5	1039.38	1354.17	230.303	236.449	298.176	206.004	221.804	350.494
AT1G56220	TCV > Mock = NES	0	2.28805	2.3653	4422.43	3106.54	3694.31	783.939	904.418	609.605	973.042	638.161	566.951
AT4G38550	TCV > Mock = NES	0	2.22425	2.3601	7063.32	5868.4	5919.62	1390.9	991.904	1651.57	1514.79	1093.88	1063.14
AT4G39670	TCV > Mock > NES	0	3.7322	2.35445	4300.65	3284.23	2853.53	465.145	143.052	177.249	948.497	572.301	520.33
AT1G52880	TCV > Mock > NES	0	2.91176	2.35275	2714.55	2366.29	2034.57	450.396	239.996	255.106	461.976	381.534	549.468
AT5G37740	TCV > Mock > NES	0	3.53907	2.35223	1472.18	1492.1	1495.56	145.216	140.687	97.7356	242.822	255.113	375.47
AT3G03000	TCV > NES > Mock	0	1.57739	2.33824	389.897	364.32	445.063	112.315	153.692	135.836	63.1163	91.5984	82.4202
AT1G03090	TCV > Mock = NES	0	2.02088	2.33265	2531.88	1826.96	2099.1	612.63	446.889	531.748	559.28	366.393	356.322
AT1G32940	TCV > Mock > NES	0	4.24915	2.33083	3759.51	4199.5	3439.04	196.268	184.43	218.663	987.945	637.404	640.214
AT5G09290	TCV > Mock > NES	0	10.0463	2.32157	1890.56	1776.95	1714.77	3.4035	0	1.65653	271.751	193.038	611.908
AT2G21185	TCV > Mock = NES	0	2.12893	2.3177	1356.29	1304.59	1208.03	338.081	264.823	281.611	206.004	202.879	367.145
AT4G00040	TCV > Mock = NES	0	1.97861	2.31653	1358.26	1759.99	1494.61	373.25	399.599	397.568	263.861	264.197	397.948
AT1G23870	TCV > Mock > NES	0	3.48461	2.31408	1459.41	1122.43	1681.56	144.081	140.687	96.079	307.692	324.001	225.615
AT2G47130	TCV > Mock > NES	0	3.35016	2.31121	1357.27	1117.96	925.237	131.602	37.8319	163.997	255.972	179.412	249.758
AT3G60540	TCV > Mock > NES	0	3.94504	2.30909	601.05	442.898	499.154	41.9765	36.6496	21.535	59.6098	88.5703	163.175
AT1G14370	TCV > Mock = NES	0	2.65973	2.30631	3415.77	2208.24	2519.49	524.139	365.314	399.225	594.345	553.375	498.684
AT3G51130	TCV > Mock = NES	0	2.00403	2.30446	2662.5	2587.74	2183.56	660.279	540.286	652.675	504.053	433.01	567.784
AT1G28190	TCV > Mock > NES	0	3.7306	2.2989	2330.54	1510.86	1549.65	173.578	134.776	97.7356	453.21	295.991	346.331
AT1G29160	TCV > Mock = NES	0	1.83295	2.2941	216.064	180.374	181.252	53.3215	59.1123	49.696	25.4218	34.0655	58.2769
AT5G67340	TCV > Mock > NES	0	4.35113	2.28723	3723.17	3234.23	2735.86	235.976	81.5749	157.371	983.562	560.188	442.072
AT1G53580	TCV > Mock = NES	0	2.56944	2.28703	9541.18	7053.34	7345.91	1517.96	1216.53	1298.72	1747.09	1289.19	1869.02
AT2G37580	TCV > Mock = NES	0	1.59342	2.28644	105.086	92.8658	104.386	47.649	17.7337	34.7872	15.7791	12.8692	33.3011
AT5G58540	TCV > Mock = NES	0	2.80298	2.28574	844.613	679.528	603.539	117.988	104.038	82.8267	160.421	146.86	129.042
AT3G23920	TCV > NES > Mock	0	1.89346	2.27929	23342.8	25126.4	20981.5	7108.77	5404.04	6180.53	4653.95	3766.89	5885.97
AT5G47860	TCV > Mock = NES	0	2.34509	2.27423	4971.43	3992.34	3614.59	906.465	667.969	901.155	802.103	685.852	1112.26
AT5G25910	TCV > Mock > NES	0	7.04857	2.27056	718.903	593.805	644.345	9.07599	2.36449	3.31307	217.4	99.9255	88.2479
AT1G17744	TCV > Mock > NES	0	4.09243	2.25861	65.8926	90.3468	64.6518	2.27354	2.36449	8.28267	18.4238	14.3923	13.3204
AT2G42890	TCV > Mock > NES	0	3.253	2.25859	4673.85	4310.22	3983.74	528.677	326.3	505.243	932.718	736.572	1040.66
AT1G18470	TCV > Mock = NES	0	2.6473	2.25708	5108.93	3478	3956.22	719.549	659.693	622.857	886.258	827.731	909.953
AT1G07310	TCV > NES > Mock	0	1.81255	2.25676	2049.66	1864.46	1793.54	551.367	470.534	602.979	396.23	370.936	427.087
AT5G61640	TCV > Mock = NES	0	2.56385	2.25131	2152.78	1901.07	1918.8	399.344	327.482	283.267	349.769	361.851	542.808
AT5G12340	TCV > Mock > NES	0	5.93951	2.25075	85.4434	79.4717	77.8148	2.269	0	1.65653	15.7791	22.7103	12.4879
AT1G49530	TCV > Mock = NES	0	2.28341	2.24771	171.869	183.053	155.63	43.111	31.9206	29.8176	42.0775	37.0936	28.3059
AT1G07040	TCV > Mock = NES	0	2.76047	2.2469	2691.96	2072.51	2127.57	414.092	276.645	326.337	477.755	365.636	608.578
AT3G11930	TCV > NES > Mock	0	1.29827	2.2451	5352.49	4299.51	4647.06	2129.45	2096.12	1588.62	857.329	975.031	1183.85
AT4G35750	TCV > Mock > NES	0	3.97926	2.24427	18587.4	14506.7	15571.5	1009.7	1093.58	982.325	3230.33	3351.29	3689.76
AT3G26220	TCV > Mock > NES	0	4.67329	2.23727	5672.66	5402.29	4698.31	283.625	99.3086	235.228	1435.02	980.33	929.933
AT1G23130	TCV > NES > Mock	0	1.34656	2.23507	65026.4	51034.2	43855.3	22437	15606.8	24839.7	11495.9	7866.86	14605
AT3G14067	TCV > Mock = NES	0	2.53662	2.2325	23574.5	27962.4	22950.6	4777.38	2833.84	5226.37	6088.09	4207.47	5554.62
AT5G58730	TCV > Mock = NES	0	2.4106	2.23134	1375.93	1312.62	1174.81	274.549	231.72	220.319	273.504	252.842	296.38
AT4G27745	TCV > Mock = NES	0	1.97833	2.23008	1305.22	1077.78	1042.91	298.373	269.552	301.489	205.128	227.86	297.212
AT1G79380	TCV > Mock = NES	0	1.69723	2.22585	7412.96	5490.69	5561.86	2000.12	1804.11	1890.11	1237.78	1212.73	1496.88
AT3G08760	TCV > Mock > NES	0	3.32133	2.22293	2690	1738.55	2382.84	235.976	223.444	221.976	499.67	548.076	411.269
AT5G24620	TCV > NES > Mock	0	1.56542	2.21951	1768.78	1239.4	1606.59	542.291	500.09	516.839	321.718	286.15	382.963
AT3G13910	TCV > Mock > NES	0	3.93742	2.21769	1211.92	1292.08	1140.65	91.8944	53.201	92.766	291.913	196.066	295.547
AT4G16520	TCV > Mock = NES	0	1.86275	2.21484	6636.11	6080.03	4913.72	2187.31	1285.1	1374.92	1005.48	1053	1739.15
AT5G25755	TCV > Mock > NES	0	3.01164	2.21477	254.366	191.982	236.291	35.1695	13.0047	36.4438	42.9541	49.9627	54.1143
AT2G02080	TCV > NES > Mock	0	1.3752	2.21101	1805.12	1803.74	1426.29	684.103	740.086	516.839	294.543	313.403	479.536
AT1G31820	TCV > Mock > NES	0	5.38978	2.20451	2077.16	2503.8	1995.67	61.263	42.5608	53.0091	554.021	430.739	442.072
AT2G43060	TCV > Mock = NES	0	2.34098	2.20303	1557.62	1486.75	1393.08	319.929	274.281	281.611	328.731	269.496	365.48
AT3G53650	TCV > NES > Mock	0	1.31448	2.20194	328.024	287.527	220.159	97.5669	132.411	106.018	57.8566	61.3179	62.4396
AT5G21170	TCV > Mock = NES	0	2.71507	2.20181	1738.33	1176	1569.58	267.742	249.454	165.653	383.081	295.991	295.547
AT4G39090	TCV > Mock = NES	0	2.50002	2.19612	14428.2	12094	11876.3	2736.41	2247.45	1803.97	3066.4	2221.83	3091.17
AT5G04490	TCV > NES > Mock	0	1.61781	2.1954	1621.46	1349.23	1213.72	491.238	439.795	432.356	291.913	286.15	335.509
AT4G01010	TCV > Mock > NES	0	4.56388	2.19275	3027.84	2776.15	2556.5	149.754	66.2057	137.492	613.63	513.254	701.821
AT1G65500	TCV > Mock > NES	0	4.55038	2.19086	1358.26	1228.69	954.655	51.0525	43.7431	56.3222	296.296	243.758	235.605
AT5G05380	TCV > NES > Mock	0	1.60482	2.18935	200.35	156.265	193.588	52.187	59.1123	69.5745	36.8178	36.3365	47.4541
AT1G69810	TCV > Mock = NES	0	1.75346	2.18727	192.493	183.946	241.036	77.1459	57.93	48.0395	35.9412	52.9908	46.6215
AT3G13062	TCV > Mock > NES	0	2.7052	2.18626	5631.41	4615.61	4902.33	845.202	680.973	796.793	1148.37	953.077	1227.15
AT2G22880	TCV > Mock = NES	0	1.81853	2.18541	446.859	325.03	348.269	158.83	79.2104	79.5137	104.317	79.4862	62.4396
AT2G39050	TCV > Mock = NES	0	2.0516	2.18511	1436.82	1598.36	1545.86	427.706	273.099	404.195	300.679	277.066	429.584
AT2G44370	TCV > Mock > NES	0	4.1333	2.18057	688.458	646.489	515.286	40.842	49.6543	14.9088	249.835	115.823	42.4589
AT4G33940	TCV > NES > Mock	0	1.81647	2.17982	1629.32	1618.01	1379.79	418.63	502.454	392.599	382.204	295.991	343.001
AT2G45920	TCV > NES > Mock	0	1.51687	2.17703	1595.93	2018.94	1676.81	599.016	686.885	563.222	339.25	417.113	413.766
AT4G27740	TCV > NES > Mock	0	1.62771	2.17653	1160.85	1066.17	996.409	387.999	229.356	425.729	169.187	198.337	345.499
AT4G31875	TCV > Mock = NES	0	1.58413	2.17481	98.2109	103.841	116.722	34.1099	47.2898	24.8994	28.0902	17.4771	25.0083
AT4G29570	TCV > Mock = NES	0	4.79278	2.17258	34.3738	41.0753	34.1626	2.269	0	1.65653	4.38307	9.08414	10.8229
AT4G27780	TCV > Mock = NES	0	2.03173	2.16989	1809.04	1931.43	1644.55	466.279	381.865	468.799	412.886	363.365	420.426
AT5G18130	TCV > Mock > NES	0	4.59699	2.16948	8624.88	6867.6	6513.67	391.402	166.697	351.185	2168.74	1412.58	1310.4
AT1G32583	TCV > Mock = NES	0	2.21222	2.16462	489.09	450.042	409.002	73.7424	94.5796	122.584	114.837	106.739	79.0901
AT2G32160	TCV > Mock = NES	0	1.85318	2.16444	6336.56	6762.24	6049.63	2055.71	1150.32	2093.86	1187.81	1236.2	1847.38
AT3G62770	TCV > Mock = NES	0	1.94883	2.15847	1811.99	1669.8	1543.01	473.086	354.674	473.769	392.723	357.309	375.47
AT4G34180	TCV > Mock = NES	0	2.83346	2.15682	13793.7	9664.29	9460.19	1751.67	1327.66	1538.92	2589.52	2291.47	2500.91
AT3G19390	TCV > Mock > NES	0	4.62207	2.15111	127.674	190.196	160.374	5.6725	7.09347	6.62614	39.4477	42.3926	25.8084
AT5G49015	TCV > Mock > NES	0	3.83812	2.14642	179.726	116.082	130.008	12.4795	10.6402	6.62614	30.6815	36.3365	29.1385
AT4G14020	TCV > Mock > NES	0	2.83631	2.14546	3302.83	2599.35	2826.01	462.876	234.085	525.122	490.904	442.852	1038.99
AT5G61250	TCV > Mock > NES	0	3.56313	2.14372	1384.77	1353.7	1363.66	122.526	88.6684	135.836	278.763	274.038	375.47
AT5G42440	TCV > Mock > NES	0	3.07923	2.14053	1272.81	1218.86	1077.07	150.888	112.313	159.027	277.01	263.44	268.906
AT1G64500	TCV > NES > Mock	0	1.21884	2.13736	13234.9	12202.9	11561.2	4801.2	5233.8	5860.82	3271.53	2347.49	2790.63
AT4G23450	TCV > Mock > NES	0	3.9555	2.13707	569.623	449.149	475.43	44.2455	27.1916	24.848	124.479	96.1404	119.051
AT3G24100	TCV > Mock = NES	0	2.26968	2.13476	2951.24	2489.52	2584.02	456.069	610.039	598.009	640.805	449.665	736.787
AT3G08870	TCV > Mock = NES	0	2.37934	2.12513	1991.72	1753.73	1506.95	334.677	143.052	531.748	436.554	302.048	465.383
AT1G07090	TCV > Mock = NES	0	1.66536	2.12356	455.698	452.721	351.116	136.14	113.496	147.432	78.8953	88.5703	121.549
AT5G54080	TCV > Mock = NES	0	2.72227	2.11943	3762.46	2516.31	2626.72	558.174	335.758	455.547	653.955	532.179	863.331
AT5G66170	TCV > Mock = NES	0	2.55013	2.11584	995.858	670.598	724.057	170.175	133.594	104.362	184.089	155.944	211.462
AT2G07708	TCV > Mock = NES	0	2.48631	2.11512	37.6079	37.5044	42.7033	6.80699	5.91123	8.28267	10.5194	8.32712	8.32528
AT3G55470	TCV > Mock > NES	0	2.50332	2.11355	2223.49	1954.65	1981.43	365.309	325.117	395.912	487.398	382.291	553.631
AT1G01240	TCV > Mock > NES	0	3.51	2.11313	2313.85	1809.99	1703.39	209.882	160.785	140.805	480.385	401.973	464.55
AT5G43440	TCV > Mock > NES	0	3.60211	2.11143	1836.54	1189.4	1401.62	132.736	91.0329	140.805	347.139	361.094	316.36
AT3G15300	TCV > Mock = NES	0	2.52723	2.10635	172.851	153.586	158.477	30.6315	23.6449	29.8176	42.9541	28.0094	41.6264
AT4G11300	TCV > Mock > NES	0	3.04687	2.10406	970.323	784.895	876.84	104.374	89.8506	124.24	247.205	213.477	151.52
AT5G14780	TCV > Mock > NES	0	2.9074	2.10133	20689.1	26367.6	19817.2	2715.99	2794.83	3402.52	6547.44	3864.54	5172.49
AT1G61420	TCV > Mock > NES	0	3.65837	2.10119	1276.61	1463.09	955.376	111.181	80.3903	101.049	332.239	255.87	273.067
AT1G67330	TCV > Mock = NES	0	2.08087	2.09983	328.024	358.962	362.503	69.2044	74.4815	104.362	99.9341	66.617	78.2576
AT3G02875	TCV > Mock > NES	0	2.72177	2.09766	1913.15	1585.86	1318.11	284.759	206.893	238.541	367.302	345.197	412.934
AT1G33720	TCV > Mock > NES	0	5.73813	2.09636	2442.5	2580.6	2009.9	45.38	28.3739	57.9787	632.916	507.198	504.512
AT1G32690	TCV > Mock = NES	0	2.01031	2.09634	244.545	314.315	276.148	82.8184	61.4768	62.9483	53.4735	64.346	77.4251
AT1G73805	TCV > Mock > NES	0	4.03159	2.09503	11358.1	6814.92	8302.35	816.839	280.192	521.808	2635.98	1834.24	1726.66
AT4G16690	TCV > NES > Mock	0	1.39113	2.09413	3652.46	3512.83	2642.86	1372.74	1367.86	998.891	724.96	622.263	949.914
AT1G21000	TCV > Mock = NES	0	2.45068	2.09273	9829.92	8299.88	8059.53	1687	1380.86	1722.8	2395.79	1852.41	1891.5
AT1G20620	TCV > Mock = NES	0	2.92674	2.09203	240292	168818	164019	29081.8	17921.7	28369.8	55009.3	39524.3	39893.9
AT1G02300	TCV > Mock > NES	0	3.69801	2.07963	741.492	785.787	716.466	73.7424	46.1076	53.0091	162.174	160.486	208.132
AT4G26750	TCV > Mock = NES	0	2.53781	2.07471	2168.5	1618.01	1802.08	343.753	279.01	339.59	493.534	436.796	396.283
AT1G28330	TCV > Mock > NES	0	4.68334	2.07381	3490.41	3611.94	3572.84	148.619	127.683	139.149	1160.64	712.348	662.692
AT5G45350	TCV > NES > Mock	0	1.48941	2.07239	6812.89	4858.49	5140.52	2289.42	1789.92	1908.33	1250.05	1144.6	1602.62
AT4G29110	TCV > Mock > NES	0	3.9506	2.07038	4029.59	4013.77	2547.01	309.718	138.323	236.884	710.058	752.469	1058.98
AT2G31910	TCV > Mock = NES	0	2.8172	2.06876	57.9444	88.4011	89.2024	10.2105	8.27572	14.9088	15.7791	21.1963	19.1481
AT2G23840	TCV > NES > Mock	0	1.35637	2.06636	2130.19	2202.88	1799.23	931.424	625.408	838.207	383.957	371.693	708.481
AT2G21620	TCV > Mock > NES	0	2.75653	2.06362	5269.99	5488.01	4653.71	745.366	731.81	803.419	1267.58	1003.8	1415.3
AT2G47710	TCV > Mock = NES	0	1.86815	2.06304	8828.17	8381.14	8077.56	2352.95	2229.71	2344	1990.79	1665.42	2395.18
AT1G29640	TCV > Mock > NES	0	3.03869	2.06038	1641.1	1349.23	1231.75	162.233	147.781	203.754	355.906	314.16	342.169
AT5G22860	TCV > NES > Mock	0	1.62777	2.05996	1288.53	1227.79	1415.85	363.04	392.505	516.839	306.815	274.038	362.149
AT2G23290	TCV > Mock = NES	0	2.01716	2.05865	413.468	447.363	601.641	98.7014	130.047	132.523	103.441	121.879	125.712
AT1G13360	TCV > Mock > NES	0	3.11839	2.05738	18227	13624.5	14774.4	2202.06	1260.27	1906.67	4107.82	3053.03	4041.09
AT3G06420	TCV > NES > Mock	0	1.18187	2.05633	1056.75	772.393	923.339	417.496	427.973	367.751	180.583	175.627	305.538
AT3G17020	TCV > Mock = NES	0	1.84653	2.05442	5053.93	3676.24	3855.63	1134.5	1099.49	1265.59	935.348	826.656	1267.94
AT5G06320	TCV > Mock = NES	0	1.59132	2.05151	38191.3	25720.3	28983.2	10951.3	9891.85	9985.59	9868.93	7763.91	4776.21
AT1G21400	TCV > Mock > NES	0	2.79657	2.04661	6675.39	6246.12	5224.98	869.026	755.455	987.295	1557.74	1144.6	1690.03
AT4G13010	TCV > NES > Mock	0	1.27322	2.04581	7825.44	6661.33	6995.74	3156.18	2770	2961.88	1821.61	1491.31	1889.84
AT5G27280	TCV > Mock = NES	0	2.18618	2.03932	1315.04	1083.14	975.532	318.794	185.613	236.884	255.095	188.496	377.135
AT3G61900	TCV > Mock > NES	0	4.39865	2.039	171.869	172.337	143.293	7.94149	3.54674	11.5957	31.5581	28.7664	58.2769
AT1G70300	TCV > Mock > NES	0	3.88823	2.03713	1386.74	1183.15	1122.62	82.8184	88.6684	77.8571	312.951	294.477	292.217
AT1G55980	TCV > Mock > NES	0	3.38482	2.03553	154.042	211.884	149.989	14.1041	15.3976	19.8619	31.1181	45.8408	48.8594
AT1G28200	TCV > Mock = NES	0	2.31529	2.02985	2635.98	2213.6	2289.84	494.642	469.351	470.456	589.962	548.076	610.243
AT5G63990	TCV > Mock = NES	0	1.73273	2.0264	504.804	691.136	517.184	189.461	161.968	163.997	95.551	122.636	202.304
AT1G04490	TCV > Mock = NES	0	1.63083	2.02536	225.885	194.661	159.425	57.8595	61.4768	67.9179	52.5969	42.3926	47.4541
AT4G28300	TCV > NES > Mock	0	1.72832	2.02223	4663.05	4746.87	4729.62	1528.17	1178.7	1560.46	1154.5	1082.53	1243.8
AT1G22490	TCV > Mock = NES	0	1.06387	2.01873	58.9265	77.6858	64.5294	35.1695	29.5561	31.4742	15.7791	19.6823	14.153
AT3G51330	TCV > Mock > NES	0	6.59242	2.01844	1789.4	3177.97	1830.55	35.1695	15.3692	19.8784	468.112	449.665	760.098
AT5G48180	TCV > Mock = NES	0	1.79555	2.01244	12242	10849.2	10813.4	3114.2	2837.39	3815	2755.2	2601.09	3047.05
AT4G16190	TCV > Mock > NES	0	4.38486	2.01086	88489.9	80886.1	78029.3	4263.45	2885.86	4692.96	21247.4	17343.9	22796.3
AT4G05150	TCV > Mock > NES	0	3.64199	2.00655	5414.36	3659.27	4022.65	335.812	323.935	389.286	1174.66	952.32	1132.24
AT3G23870	TCV > Mock > NES	0	4.19278	2.00538	59.9086	50.0047	44.6012	2.269	1.18225	4.9696	12.2726	12.8692	13.3204
AT3G11660	TCV > Mock = NES	0	1.58983	2.00538	5992.83	5721.07	4314.93	2234.96	1625.59	1464.38	1022.13	1255.12	1715.01
AT5G35370	TCV > Mock > NES	0	2.74764	2.00173	1528.16	1464.42	1475.63	226.9	166.697	271.672	467.236	326.272	322.188
AT5G04750	TCV > Mock = NES	0	2.1233	1.99967	4661.09	5558.55	4240.91	1174.21	1091.21	1053.56	1023.01	980.33	1612.61
AT1G24793	TCV > Mock = NES	0	1.85715	1.99578	560.543	502.129	569.628	156.469	141.851	152.207	116.478	166.259	126.51
AT5G14285	TCV > Mock = NES	0	1.94378	1.9937	461.591	678.635	492.511	155.426	134.776	134.179	140.258	117.337	152.353
AT2G26480	TCV > Mock > NES	0	7.67633	1.9932	689.44	682.206	598.795	2.269	2.36449	4.9696	198.115	187.739	109.061
AT4G33040	TCV > Mock > NES	0	2.89645	1.99259	5973.18	4889.74	4493.33	831.588	342.851	887.903	1163.27	894.787	1800.76
AT2G42790	TCV > Mock > NES	0	3.60899	1.98937	7151.71	6756.88	6181.53	575.191	554.473	516.839	1615.6	1478.44	1965.6
AT1G08050	TCV > Mock > NES	0	4.42139	1.98539	2568.21	3078.86	2463.5	166.771	104.038	107.675	710.935	589.712	747.61
AT4G22240	TCV > NES > Mock	0	1.24286	1.98512	11637	11085.9	9341.57	4178.36	4123.67	5246.25	2577.25	2055.29	3466.64
AT1G63440	TCV > Mock = NES	0	2.10262	1.98286	290.704	225.914	274.25	76.0114	48.4721	59.6353	64.8695	71.9161	63.2721
AT3G10450	TCV > Mock > NES	0	3.15758	1.98239	4340.92	3979.84	3647.81	394.806	469.351	477.082	840.674	1090.1	1098.1
AT2G15580	TCV > NES > Mock	0	1.32415	1.97915	3773.26	3575.33	3251.14	1260.43	1500.27	1472.66	967.783	785.778	934.928
AT1G13340	TCV > Mock > NES	0	4.04386	1.97802	12486.5	10926.9	8352.76	832.722	718.805	374.377	2932.28	2976.57	2154.58
AT3G04220	TCV > Mock > NES	0	6.24794	1.97363	2043.77	1968.04	1715.72	36.304	22.4627	16.5653	603.111	382.291	472.876
AT3G15840	TCV > NES > Mock	0	1.10138	1.96875	6708.78	5162.09	4818.83	3048.4	2174.15	2556.03	1202.72	1003.04	2058.01
AT5G20960	TCV > Mock > NES	0	5.16276	1.96785	6044.88	4500.42	5207.9	139.543	131.229	168.967	1685.73	1374.73	966.564
AT4G35110	TCV > Mock = NES	0	1.60705	1.96429	1364.15	997.414	1075.17	353.964	427.973	346.216	315.581	252.085	313.03
AT2G04795	TCV > NES > Mock	0	1.01104	1.96316	474.358	596.484	475.43	246.186	348.762	172.28	127.986	137.019	131.539
AT2G15830	TCV > Mock = NES	0	1.58297	1.95958	276.955	295.563	309.361	125.929	92.2151	76.2006	66.6227	72.6731	87.4154
AT5G42250	TCV > Mock > NES	0	2.72635	1.95263	1217.81	1496.57	1209.93	174.713	163.15	255.106	331.36	311.132	371.307
AT4G00140	TCV > Mock = NES	0	2.20942	1.95262	76.6045	51.7905	69.2742	13.614	5.91123	23.1915	20.1621	15.8972	14.9855
AT4G18830	TCV > NES > Mock	0	1.19733	1.95207	318.203	417.003	318.696	146.35	119.407	193.815	83.2784	74.1871	114.889
AT1G31240	TCV > Mock = NES	0	2.22748	1.94986	56.9623	62.5058	56.9377	15.883	11.8225	9.93921	21.0388	12.1122	12.4879
AT4G10960	TCV > Mock > NES	0	3.10291	1.94961	2605.53	2698.47	2158.89	407.285	163.15	298.176	626.78	602.581	702.653
AT4G10810	TCV > Mock = NES	0	1.82872	1.94896	1291.47	1262.62	1302.92	360.771	377.136	347.872	308.568	314.917	375.47
AT5G60360	TCV > Mock = NES	0	2.32195	1.94744	49019	55735.5	41990.6	10185.5	8501.53	10661.5	13023.9	9726.84	15296.9
AT1G33730	TCV > Mock > NES	0	14.4262	1.94643	227.849	199.126	233.444	0	0	0	101.687	52.9908	16.6506
AT2G41342	TCV > Mock = NES	0	2.92051	1.94474	55.9802	76.7929	52.1929	10.2105	5.91123	8.28267	15.7791	18.9253	13.3204
AT4G16860	TCV > Mock = NES	0	2.30495	1.94328	14197.4	9360.16	10410.9	2458.16	1325.36	3090.56	3269.02	2630.24	2933.33
AT5G63620	TCV > Mock = NES	0	2.20101	1.94289	1840.47	1406.38	1580.97	380.057	345.216	324.681	433.048	391.375	431.249
AT5G01520	TCV > NES > Mock	0	1.24316	1.93204	1117.64	817.933	966.992	510.525	268.37	447.264	322.594	174.113	263.911
AT4G38460	TCV > Mock = NES	0	2.31625	1.93027	3703.53	4139.67	3056.6	746.5	675.062	766.976	908.173	790.32	1161.38
AT1G26380	TCV > Mock > NES	0	7.93976	1.9296	1539.95	1217.08	849.32	11.345	0	3.31307	476.002	180.926	289.72
AT4G26990	TCV > Mock = NES	0	2.24939	1.92922	967.377	1256.37	1025.83	222.362	217.533	243.511	277.887	249.814	325.518
AT1G12290	TCV > Mock > NES	0	3.28147	1.92887	916.307	1142.07	1050.5	108.912	73.2992	137.492	226.167	224.832	365.48
AT4G03510	TCV > Mock = NES	0	2.47338	1.92652	300.979	228.128	317.013	55.5905	52.0188	44.7264	79.651	77.9722	64.9371
AT4G32870	TCV > Mock > NES	0	2.5648	1.92486	1154.96	1124.21	955.604	228.034	126.5	192.158	265.614	198.337	387.958
AT1G12810	TCV > Mock = NES	0	2.04664	1.92135	1694.14	1515.32	1515.49	407.285	398.417	337.933	420.775	334.599	492.024
AT1G80310	TCV > Mock > NES	0	4.4276	1.92099	1879.64	2098.2	1580.97	106.643	63.8413	87.7963	594.345	479.945	393.618
AT5G66490	TCV > Mock = NES	0	1.85516	1.91539	1500.66	1509.96	1281.1	401.613	426.791	357.812	402.366	331.571	403.776
AT3G10490	TCV > Mock = NES	0	2.0882	1.91289	3474.7	3049.39	2913.31	715.869	711.712	791.824	952.88	811.516	741.782
AT1G03550	TCV > Mock > NES	0	3.35637	1.90945	1839.49	1572.47	1578.12	169.04	144.234	173.936	404.119	374.721	549.468
AT1G58190	TCV > Mock > NES	0	3.59597	1.90776	144.37	175.909	167.966	7.94149	14.1869	18.2219	56.98	34.8225	38.2963
AT1G27930	TCV > Mock > NES	0	2.12465	1.90397	1920.02	1853.74	1904.57	471.952	346.398	483.708	493.534	461.777	561.956
AT1G06620	TCV > Mock > NES	0	4.07447	1.90344	1219.78	1009.02	868.3	116.853	27.1916	39.7568	182.336	347.468	298.045
AT4G17230	TCV > Mock = NES	0	1.95656	1.90285	3143.73	2206.46	2494.82	948.441	542.651	530.091	838.92	674.497	584.434
AT3G21780	TCV > Mock > NES	0	4.34594	1.90244	1558.61	1087.6	1210.87	90.7599	42.5608	56.3222	470.742	327.029	233.94
AT4G01610	TCV > Mock > NES	0	3.36952	1.90171	23118.8	17912.4	17571.9	2099.96	1597.21	1972.93	4897.65	4358.11	6427.95
AT4G34480	TCV > NES > Mock	0	1.46901	1.90088	7676.16	7518.56	6957.78	2776.12	2399.96	2826.05	1632.26	1813.8	2485.93
AT5G65210	TCV > Mock > NES	0	3.78415	1.89965	2543.66	2856.52	2184.51	198.537	179.701	172.28	692.526	635.89	704.318
AT3G12830	TCV > Mock > NES	0	2.81337	1.89555	2151.8	2392.19	1786.89	321.063	273.099	306.459	548.761	470.104	682.673
AT1G22985	TCV > Mock = NES	0	2.26172	1.895	342.756	246.452	272.352	58.994	62.659	57.9787	98.1809	72.6731	60.7745
AT3G15760	TCV > NES > Mock	0	1.41098	1.89336	1750.12	1612.65	1329.49	720.407	519.006	525.122	377.821	414.842	470.378
AT1G26800	TCV > Mock > NES	0	2.6985	1.89244	585.337	447.363	666.171	70.3389	113.496	77.8571	152.531	138.533	166.506
AT3G26210	TCV > Mock > NES	0	4.86021	1.88914	6989.67	7895.38	6383.66	327.87	69.7525	334.62	1956.6	1872.09	1913.15
AT5G60280	TCV > Mock > NES	0	5.7588	1.88121	875.059	1065.28	875.891	12.4795	21.2804	18.2219	291.913	228.617	243.931
AT5G60460	TCV > Mock > NES	0	2.49037	1.88009	645.245	667.026	587.407	111.181	99.3086	127.553	138.505	179.412	198.142
AT2G02390	TCV > Mock > NES	0	3.02092	1.87621	5995.77	5488.01	4523.7	663.682	566.296	742.128	1437.65	1237.71	1685.04
AT2G37110	TCV > Mock = NES	0	1.61685	1.87539	7001.45	5222.81	5843.7	2129.45	1970.8	1790.71	1595.44	1579.88	1749.14
AT1G65520	TCV > Mock > NES	0	2.571	1.87424	825.953	731.318	634.855	108.912	124.136	135.836	214.771	190.01	193.146
AT3G15580	TCV > Mock = NES	0	2.09106	1.87074	3327.38	2781.51	2447.37	764.652	604.127	639.422	749.506	651.787	938.259
AT3G48990	TCV > Mock = NES	0	2.41034	1.86849	8871.39	10399.2	7160.86	1614.39	1598.4	1759.24	2743.8	2021.22	2473.44
AT3G11080	TCV > Mock > NES	0	5.3384	1.86787	2711.63	3505.54	2400.8	93.8651	42.374	76.7357	814.263	636.398	910.444
AT4G10843	TCV > Mock = NES	0	2.79886	1.86692	93.0135	75.057	86.4105	13.614	11.9549	10.9745	25.4218	17.6838	26.6409
AT1G15400	TCV > Mock > NES	0	2.41177	1.8668	1828.69	1433.17	1518.34	264.338	310.931	323.024	487.398	352.01	471.211
AT4G20930	TCV > Mock = NES	0	1.60815	1.86629	1178.53	948.303	883.483	360.771	275.463	351.185	253.342	221.804	350.494
AT4G39580	TCV > Mock > NES	0	5.15017	1.86106	459.627	326.816	354.912	18.152	2.36449	11.5957	156.037	100.683	57.4444
AT5G41400	TCV > Mock = NES	0	2.01061	1.86008	3545.41	3098.5	2900.03	889.447	591.123	887.903	951.127	606.366	1071.46
AT3G47780	TCV > Mock > NES	0	4.8595	1.85983	4575.64	4389.69	3856.58	156.561	94.5796	190.502	1767.26	1073.44	691.83
AT4G07408	TCV > Mock > NES	0	3.19247	1.85719	216.064	180.374	203.078	21.5555	22.4627	21.535	52.5969	45.4207	67.4347
AT5G18270	TCV > Mock > NES	0	5.67644	1.85688	2956.15	2034.12	2163.63	54.456	39.0141	46.383	976.549	690.394	308.035
AT4G16210	TCV > Mock = NES	0	1.82732	1.85592	1564.5	1319.77	1296.28	378.923	370.043	429.043	356.782	378.506	419.594
AT1G61250	TCV > Mock > NES	0	2.49671	1.8555	9148.34	7176.56	7638.19	1495.27	1191.7	1558.8	2232.74	1977.31	2411.83
AT1G27300	TCV > Mock > NES	0	2.87264	1.85092	2188.14	2632.39	1848.58	297.239	374.772	238.541	774.051	635.133	439.575
AT3G26100	TCV > Mock = NES	0	1.75013	1.85011	6450.49	5043.33	5228.78	1775.49	1411.6	1784.09	1361.38	1258.91	2018.05
AT3G20250	TCV > Mock > NES	0	3.14873	1.8495	8678.89	8391.85	7962.73	1128.83	699.889	993.921	2326.54	2117.36	2502.58
AT5G25250	TCV > Mock > NES	0	5.62299	1.84904	6032.92	4602.4	5313.86	150.888	48.4721	124.24	2216.08	1383.65	827.377
AT2G37760	TCV > Mock > NES	0	4.02835	1.84782	2680.17	3991.44	2612.49	260.935	132.411	175.593	954.633	747.927	876.652
AT4G13820	TCV > Mock > NES	0	3.49141	1.84501	932.021	1043.03	956.553	112.315	63.8413	84.4833	215.647	325.515	274.84
AT1G09815	TCV > Mock = NES	0	2.14839	1.84464	848.542	1060.81	840.78	187.192	221.08	212.036	287.53	264.197	213.96
AT5G02020	TCV > Mock > NES	0	3.81998	1.84452	885.862	1064.38	966.992	88.4909	56.7478	61.2918	294.543	234.674	283.059
AT3G61280	TCV > Mock > NES	0	4.47129	1.8443	8265.43	6713.13	6417.83	467.414	44.9253	452.234	1748.85	1788.82	2420.99
AT1G18720	TCV > Mock = NES	0	1.57286	1.84329	5106.96	4950.46	4056.81	1725.57	1559.38	1459.41	1125.57	1162.77	1645.07
AT5G15860	TCV > Mock > NES	0	2.50909	1.84148	2036.89	2469.87	1994.72	456.069	329.846	356.155	404.996	495.842	913.283
AT3G17790	TCV > Mock > NES	0	2.62135	1.84111	11779.4	10684	9125.21	1437.41	1691.79	2004.41	3501.2	3040.91	2274.47
AT5G49710	TCV > Mock = NES	0	1.90362	1.84098	1560.07	1065.28	1165.32	350.56	351.127	311.429	333.114	277.066	447.9
AT3G51250	TCV > NES > Mock	0	1.08016	1.83931	2784.28	2712.75	2635.27	1279.72	1150.32	1416.34	710.935	635.89	925.771
AT4G00955	TCV > Mock = NES	0	1.92947	1.8381	1585.12	1843.03	1619.88	401.613	323.935	599.666	454.963	455.721	501.182
AT5G53350	TCV > NES > Mock	0	1.10889	1.82924	8758.44	7533.74	6540.24	3614.51	3015.91	3955.81	2068.81	1778.98	2577.51
AT1G80570	TCV > Mock > NES	0	3.46473	1.82234	398.736	310.743	307.463	37.4385	24.8272	29.8176	109.577	93.8694	84.0853
AT5G64530	TCV > Mock = NES	0	1.84642	1.82035	584.355	568.803	451.706	136.14	147.781	162.34	120.973	162.757	170.668
AT1G71150	TCV > Mock = NES	0	4.24259	1.81984	39.2843	37.5035	29.4178	2.269	0	3.31307	12.2726	13.6262	4.16264
AT1G08720	TCV > Mock > NES	0	2.49421	1.81728	2964.99	4003.94	3023.39	644.396	509.548	619.544	1007.23	919.012	909.12
AT1G01340	TCV > Mock > NES	0	2.53763	1.81569	1367.1	1763.56	1483.23	289.297	210.44	294.863	525.092	412.571	372.972
AT1G66890	TCV > Mock = NES	0	1.77576	1.81422	395.79	408.074	317.902	106.643	109.949	110.988	127.986	105.225	85.7503
AT1G33030	TCV > Mock > NES	0	10.3754	1.81419	629.532	443.791	473.532	1.1345	0	0	171.816	150.645	117.386
AT1G66600	TCV > Mock > NES	0	13.1386	1.81371	98.2109	82.1505	90.1513	0	0	0	24.5452	42.3926	9.99033
AT3G01400	TCV > Mock = NES	0	1.95714	1.80875	1421.11	1344.77	1325.7	347.157	365.314	341.246	384.834	362.608	420.426
AT3G48310	TCV > Mock = NES	0	2.29194	1.8076	5923.25	5867.14	4341.5	1174.21	1091.21	1028.71	1669.07	1401.55	1537.68
AT2G47970	TCV > Mock > NES	0	2.39503	1.80466	2239.21	2303.79	2115.23	454.934	398.417	412.477	662.721	565.487	677.677
AT1G69930	TCV > Mock > NES	0	17.6669	1.80245	2664.46	1834.99	1743.24	0	0	0	1047.55	196.823	545.306
AT1G23010	TCV > Mock > NES	0	3.36673	1.798	662.923	503.618	612.08	68.0699	41.3786	62.9483	110.453	144.589	256.418
AT1G69480	TCV > Mock > NES	0	4.36987	1.79557	3125.07	3643.2	2790.9	149.754	67.388	245.167	1250.93	726.731	775.916
AT3G14590	TCV > Mock = NES	0	2.21006	1.79524	597.122	463.436	607.335	129.333	105.22	125.897	172.693	168.814	139.032
AT3G52060	TCV > Mock = NES	0	1.61507	1.79039	3820.4	3661.95	3565.25	1316.02	1207.07	1083.37	953.757	962.918	1277.1
AT4G38780	TCV > Mock > NES	0	4.50958	1.78686	1186.39	1309.94	1322.85	46.5145	44.9253	76.2006	432.171	506.441	168.171
AT2G35550	TCV > Mock > NES	0	4.6124	1.78062	291.686	333.96	280.893	13.614	11.8225	11.5957	103.441	86.2993	74.095
AT1G01730	TCV > Mock > NES	0	2.32212	1.77979	1990.73	1466.21	1844.78	340.35	340.487	379.346	514.573	454.964	574.444
AT5G56180	TCV > Mock > NES	0	2.30777	1.7764	2277.51	2182.35	2115.23	479.893	375.954	472.112	657.461	570.03	691.83
AT5G62740	TCV > Mock > NES	0	2.62345	1.77632	3919.6	2849.37	3261.58	584.267	475.263	568.191	973.042	881.161	1073.96
AT4G13615	TCV > NES > Mock	0	1.14313	1.77171	3286.14	3970.91	3422.9	1494.14	1688.25	1653.22	918.692	822.871	1386.16
AT3G13810	TCV > Mock = NES	0	1.44093	1.77136	2105.64	2044.83	1661.63	656.875	731.81	752.067	515.449	560.188	626.893
AT5G62150	TCV > Mock > NES	0	4.21046	1.77017	463.555	526.835	479.225	41.9765	14.1869	23.1915	171.816	107.496	151.52
AT2G15570	TCV > Mock = NES	0	1.44556	1.76678	1329.77	1126.89	1132.11	437.917	487.085	392.599	293.666	308.861	452.062
AT3G23790	TCV > Mock > NES	0	3.29845	1.76461	3266.49	2310.04	2268.02	292.701	208.075	296.52	720.577	729.759	858.336
AT2G02360	TCV > Mock = NES	0	2.00229	1.76131	1858.15	1854.64	1744.19	474.221	359.403	528.435	489.151	442.852	677.677
AT5G60680	TCV > Mock = NES	0	1.99738	1.75858	686.494	893.833	718.364	178.116	268.37	129.21	251.588	227.103	200.639
AT4G21580	TCV > Mock > NES	0	2.15921	1.75668	6094.97	5876.44	5224.03	1283.12	1266.18	1300.38	1591.06	1467.84	2029.7
AT5G53730	TCV > Mock = NES	0	1.64344	1.75319	373.201	295.563	350.167	90.7599	111.131	124.24	71.0058	85.5423	145.692
AT1G33970	TCV > Mock > NES	0	3.59294	1.75171	3662.28	2351.11	2807.03	262.069	177.337	291.55	975.672	866.778	776.748
AT2G45170	TCV > Mock > NES	0	2.82109	1.74908	3077.93	1991.26	2475.84	408.42	400.781	258.419	902.913	629.833	711.811
AT2G01190	TCV > Mock = NES	0	1.61076	1.7483	1944.57	1710.87	1936.83	558.174	638.413	634.453	545.254	613.936	505.344
AT2G10440	TCV > Mock > NES	0	8.50997	1.74472	160.084	136.62	145.191	0	1.18225	0	50.8437	47.6917	33.3011
AT2G45760	TCV > Mock > NES	0	5.5722	1.74374	562.748	585.769	337.83	17.0175	5.91123	8.28267	190.225	112.038	141.53
AT2G46550	TCV > Mock = NES	0	2.02912	1.73542	2134.12	1732.3	1755.58	534.349	433.884	409.164	619.767	512.497	556.128
AT4G00355	TCV > Mock > NES	0	2.19456	1.73375	3912.72	3932.51	3346.04	833.857	724.716	886.246	1101.9	1000.01	1262.94
AT1G51800	TCV > Mock > NES	0	3.69873	1.73097	1761.9	1449.24	1248.83	162.233	60.2945	120.927	503.177	538.992	301.375
AT4G01910	TCV > Mock > NES	0	2.47645	1.72836	700.243	638.452	706.976	96.4324	92.2151	178.906	200.745	188.496	228.113
AT5G42010	TCV > Mock > NES	0	3.06899	1.72755	525.428	653.632	511.49	91.8944	44.9253	64.6049	220.03	159.729	130.707
AT3G63220	TCV > Mock = NES	0	1.99256	1.72732	329.006	330.388	343.524	81.6839	79.2104	91.1094	122.726	80.2432	99.9033
AT5G66250	TCV > Mock > NES	0	2.03206	1.72623	1734.4	1936.79	1682.51	496.911	399.599	412.477	520.709	482.973	614.405
AT1G66920	TCV > Mock > NES	0	4.04508	1.72532	3608.36	2746.56	2392.08	241.19	72.8299	215.822	964.197	906.4	774.759
AT2G42010	TCV > Mock = NES	0	1.42613	1.71335	3374.52	2833.3	2844.04	1213.91	1046.29	1108.22	880.998	847.853	1031.5
AT1G54130	TCV > Mock = NES	0	1.36853	1.71188	5981.04	5744.29	4654.66	2493.63	1605.49	2244.6	1479.73	1363.38	2157.08
AT4G23010	TCV > Mock = NES	0	2.02946	1.7101	4718.03	3877.15	3626.93	1193.49	773.188	1027.05	1282.49	1155.96	1297.08
AT1G49900	TCV > Mock > NES	0	5.98713	1.70894	218.028	177.695	257.169	3.4035	3.54674	3.31307	98.1809	67.374	34.1336
AT1G12780	TCV > Mock > NES	0	2.62928	1.70798	7162.52	5472.83	5447.99	1068.7	1027.37	826.611	2145.08	1436.05	1953.94
AT5G20650	TCV > Mock = NES	0	1.60805	1.70543	3129.98	2747.58	2823.16	980.207	894.96	979.012	825.771	828.927	1013.19
AT5G10300	TCV > Mock > NES	0	2.72429	1.70072	787.651	657.204	629.161	157.695	73.2992	82.8267	198.992	247.543	191.481
AT1G20225	TCV > Mock = NES	0	1.72591	1.7001	3065.16	2577.92	2342.99	829.319	748.361	836.55	774.051	713.862	969.895
AT3G56110	TCV > Mock = NES	0	1.67024	1.69999	1126.48	1166.18	1176.71	343.753	381.865	364.438	311.198	318.702	437.909
AT2G30942	TCV > Mock > NES	0	2.53612	1.69708	189.547	191.089	180.303	23.8245	33.1029	39.7568	51.7203	52.9908	68.2673
AT5G20400	TCV > Mock > NES	0	4.52358	1.69704	1108.8	986.699	838.882	60.1285	26.0094	41.4134	309.445	297.505	298.045
AT3G13280	TCV > Mock > NES	0	6.09156	1.69598	41.2486	34.8247	38.9074	0	0	1.65653	11.396	17.4113	6.66022
AT1G53910	TCV > Mock = NES	0	1.88082	1.69596	9009.83	6854.19	7606.87	2399.47	1912.87	2060.66	2227.48	2328.57	2688.23
AT1G72540	TCV > Mock > NES	0	5.356	1.69499	413.468	292.884	288.484	13.614	2.36449	8.28267	108.7	96.1404	102.401
AT1G71040	TCV > Mock > NES	0	2.14561	1.69352	9011.83	8057.89	7400.95	1807.26	1529.83	2193.25	2645.62	2305.86	2614.14
AT1G30490	TCV > Mock > NES	0	2.50445	1.69349	5220.89	6382.74	5053.22	854.278	1030.92	1050.24	1494.63	1806.23	1849.04
AT2G22660	TCV > Mock > NES	0	3.11795	1.68973	9057.99	8279.34	7493	993.821	753.09	1113.19	2664.91	2292.23	2739.85
AT1G71140	TCV > Mock = NES	0	2.18675	1.68859	1120.59	863.473	750.628	199.672	177.337	223.632	339.25	254.356	254.753
AT3G11010	TCV > Mock > NES	0	2.83494	1.68848	15119	11272.8	11321.4	1770.05	683.523	2831.98	3232.62	3339.53	5128.51
AT2G21180	TCV > Mock > NES	0	2.36013	1.68647	1055.77	894.726	1004.95	214.42	193.888	167.31	333.99	319.459	264.744
AT5G04340	TCV > Mock = NES	0	1.69423	1.6847	3818.44	3519.97	3105.95	1319.42	599.398	1308.66	1407.84	1065.11	775.916
AT1G69570	TCV > Mock > NES	0	2.48516	1.68136	3055.34	3052.96	2642.86	558.174	567.478	437.325	894.147	981.844	852.508
AT5G16470	TCV > NES > Mock	0	1.08119	1.68017	3543.45	3156.54	3260.63	1384.09	1753.27	1570.4	1115.93	976.545	1015.68
AT1G23020	TCV > Mock > NES	0	2.7987	1.67876	2136.09	1325.12	1663.53	231.438	231.72	273.328	541.748	584.413	474.541
AT3G02150	TCV > Mock > NES	0	2.39293	1.67831	2430.72	1765.34	1667.32	365.309	394.87	356.155	691.649	669.955	470.378
AT3G12090	TCV > Mock = NES	0	1.32875	1.67701	218.028	152.693	205.925	70.3389	61.4768	97.7356	56.1033	56.7758	67.4347
AT1G32700	TCV > Mock = NES	0	1.82704	1.67684	5167.86	5083.51	4657.5	1707.42	1127.86	1366.64	1183.43	1514.78	1964.77
AT5G63130	TCV > Mock > NES	0	2.42417	1.67602	2706.69	2411.83	1836.24	525.273	321.571	448.921	945.867	733.544	497.019
AT4G34860	TCV > Mock > NES	0	4.5441	1.67293	1322.9	1204.58	1066.63	60.1285	59.1123	34.7872	319.964	387.59	419.594
AT1G60140	TCV > Mock > NES	0	2.05083	1.67234	2174.39	1911.79	1907.41	601.285	391.323	453.891	644.312	560.945	675.18
AT4G29440	TCV > Mock = NES	0	1.52388	1.67173	2884.45	2111.8	2338.24	857.681	693.978	998.891	823.141	738.843	740.117
AT1G77370	TCV > Mock > NES	0	2.70623	1.6706	3019.98	2457.37	2498.62	459.472	345.216	417.447	736.356	768.366	1000.7
AT1G74020	TCV > Mock = NES	0	1.44964	1.66778	1384.77	1454.6	1215.62	605.823	481.174	397.568	408.502	381.534	486.196
AT3G42640	TCV > Mock = NES	0	1.43018	1.66777	1070.5	1570.68	1212.77	434.513	520.188	475.425	462.853	400.459	349.662
AT4G27020	TCV > NES > Mock	0	1.36733	1.6659	2715.53	2423.44	2497.67	1044.87	916.24	998.891	828.401	678.282	899.962
AT5G11670	TCV > Mock = NES	0	1.90877	1.66532	7263.67	5514.8	6129.34	2036.43	1092.39	1906.67	2013.58	2114.33	1833.23
AT5G53120	TCV > Mock > NES	0	2.26903	1.665	5232.67	6315.77	5329.37	1101.6	942.25	1457.75	1402.58	1467.09	2452.63
AT5G09600	TCV > Mock > NES	0	1.99168	1.66301	1858.72	2193.44	1886.68	442.466	344.018	706.784	687.507	539.502	648.331
AT5G22300	TCV > Mock > NES	0	3.10064	1.66247	3359.79	2745.79	3516.85	536.618	139.505	445.608	918.692	712.348	1408.64
AT3G61890	TCV > Mock = NES	0	2.03518	1.66016	13522.7	14355.8	11320.2	3722.29	2712.07	3129.19	5063.33	3424.72	3914.54
AT2G35940	TCV > NES > Mock	0	1.11501	1.65908	17998.1	15947	15116	8517.82	6488.16	7644.91	4990.57	4905.43	5638.71
AT1G20110	TCV > Mock = NES	0	1.70054	1.6588	6225.59	5358.53	5185.12	1730.11	1663.42	1765.87	1719.04	1641.2	1950.61
AT1G80360	TCV > NES > Mock	0	1.21855	1.6577	2567.23	2613.64	2338.24	1077.77	1111.31	1041.96	712.688	713.862	956.574
AT3G09270	TCV > Mock > NES	0	6.44679	1.65525	604.979	389.322	410.9	5.6725	7.09347	3.31307	260.355	99.1685	86.5829
AT4G28350	TCV > Mock > NES	0	2.78672	1.6544	608.907	561.659	533.316	90.7599	65.0235	91.1094	212.141	164.271	164.84
AT3G29034	TCV > Mock > NES	0	4.00504	1.64908	233.742	220.556	175.558	23.8245	7.09347	8.28267	79.7719	63.589	57.4444
AT4G32200	TCV > Mock > NES	0	2.47696	1.64872	1002.73	1083.14	1111.23	141.812	185.613	246.824	481.262	361.851	176.496
AT5G56150	TCV > Mock > NES	0	2.19169	1.64574	2839.28	3436.03	2971.2	603.554	749.544	670.897	1017.75	818.329	1118.92
AT2G17450	TCV > Mock = NES	0	1.87343	1.64515	287.758	302.707	247.679	72.6079	81.5749	74.5441	90.2913	105.225	72.4299
AT5G54870	TCV > Mock = NES	0	1.68652	1.645	4739.66	3973.58	3866.07	1352.32	1202.34	1353.39	1251.81	1104.48	1665.89
AT3G09020	TCV > Mock > NES	0	5.1869	1.64365	1550.75	1346.55	1403.51	66.9354	13.0047	38.1003	639.929	461.777	274.734
AT3G55960	TCV > Mock = NES	0	1.57914	1.64223	3602.37	3740.53	3377.35	1220.72	1205.89	1161.23	1193.07	1067.39	1173.86
AT1G72900	TCV > Mock > NES	0	2.89816	1.63952	5736.5	4516.49	4741.01	583.133	556.838	871.337	1903.13	1705.55	1203.83
AT3G28620	TCV > Mock > NES	0	5.07895	1.6388	93.3003	77.6858	82.5596	2.269	3.54674	1.65653	20.1621	37.0936	24.1433
AT5G55970	TCV > Mock > NES	0	2.01149	1.63769	788.633	770.608	789.536	191.73	190.342	200.441	324.347	199.851	230.61
AT2G36320	TCV > Mock = NES	0	1.43911	1.63687	1685.3	1493.89	1314.31	579.729	588.758	488.678	536.488	449.665	458.723
AT3G56170	TCV > Mock = NES	0	1.45558	1.63666	1612.62	1737.66	1638.86	722.676	558.02	538.374	448.827	499.627	656.032
AT5G57510	TCV > Mock > NES	0	5.36069	1.63587	718.903	540.229	560.836	15.883	20.0982	8.28267	356.782	126.421	102.401
AT3G48890	TCV > NES > Mock	0	1.2185	1.63587	3132.93	2909.2	2445.47	1224.12	1185.79	1237.43	934.471	817.572	979.052
AT1G14340	TCV > Mock = NES	0	1.56411	1.63258	1181.48	1082.24	831.29	385.73	301.473	359.468	319.964	270.253	407.938
AT5G64990	TCV > Mock > NES	0	2.75351	1.63132	245.527	217.877	181.252	44.2455	33.1029	18.2219	90.2913	62.8319	54.9468
AT5G18780	TCV > Mock > NES	0	3.15702	1.63113	1334.69	1341.2	1164.38	162.233	107.584	160.684	393.6	355.795	490.359
AT2G43000	TCV > Mock > NES	0	5.01444	1.63032	629.532	683.992	566.53	23.8245	1.18225	33.1307	220.03	174.113	213.127
AT4G12070	TCV > Mock > NES	0	2.23775	1.6278	1153.98	1058.13	1047.65	275.683	161.968	253.45	389.217	305.076	360.484
AT1G74330	TCV > Mock = NES	0	1.71221	1.62704	1527.18	1476.03	1642.65	456.069	492.996	468.799	565.417	496.599	442.072
AT1G60960	TCV > Mock > NES	0	2.57665	1.6257	757.206	769.715	781.944	172.444	88.6684	125.897	246.329	252.085	249.758
AT1G80960	TCV > Mock = NES	0	1.7134	1.62063	509.714	421.468	417.543	113.45	153.692	144.119	137.629	121.122	179.826
AT1G67650	TCV > Mock > NES	0	4.22391	1.6181	730.818	763.402	695.646	47.4538	32.5496	37.1594	314.855	238.029	160.476
AT1G02220	TCV > Mock > NES	0	2.06012	1.61673	1542.89	1529.61	1323.8	385.73	357.038	311.429	480.385	451.936	501.182
AT5G25820	TCV > Mock > NES	0	6.26139	1.61618	1117.64	1354.59	1099.85	23.8245	9.45796	13.2523	364.672	354.281	446.235
AT4G21980	TCV > Mock > NES	0	2.51586	1.61596	5637.3	5107.62	4831.16	1017.65	889.049	816.672	1439.4	1427.72	2214.52
AT2G17705	TCV > Mock > NES	0	2.8883	1.61308	2392.42	2122.52	2276.56	307.449	329.846	279.954	718.824	748.684	752.605
AT1G76360	TCV > Mock = NES	0	1.84118	1.60943	3948.08	2749.36	2973.1	958.652	852.399	887.903	1297.39	1039.38	832.528
AT5G38210	TCV > Mock > NES	0	2.6862	1.60415	3074	2107.34	2314.52	467.414	231.72	465.486	901.16	791.834	772.586
AT3G45330	TCV > Mock > NES	0	15.0038	1.60175	434.092	300.028	251.475	0	0	0	186.719	85.5423	52.4492
AT5G01720	TCV > Mock > NES	0	3.34838	1.60122	3347.03	3155.65	2397.08	311.987	296.744	265.046	1126.45	956.862	850.011
AT2G43540	TCV > Mock > NES	0	4.28123	1.60027	1000.77	974.198	886.33	66.9354	35.4674	44.7264	369.931	265.711	308.035
AT3G23120	TCV > Mock > NES	0	2.09105	1.59965	9008.13	7489.65	7435.44	1904.84	602.942	3109.56	2292.43	2421.77	3182.73
AT1G64950	TCV > Mock = NES	0	1.7512	1.596	9270.72	8506.42	7518.78	2552.75	2068.68	2892.81	3187.28	2095.92	3084.51
AT1G01780	TCV > Mock = NES	0	1.86707	1.59572	587.301	468.794	496.307	155.426	169.061	101.049	160.421	173.356	179.826
AT3G60690	TCV > Mock > NES	0	2.14457	1.59439	3779.15	3201.19	2844.04	689.775	785.011	747.097	1279.86	921.283	1052.31
AT2G17760	TCV > Mock = NES	0	1.55691	1.59052	3597.46	3324.42	3018.65	1174.21	880.773	1323.57	1125.57	1053.76	1121.41
AT4G35860	TCV > NES > Mock	0	1.16295	1.5905	2025.11	1888.57	1933.98	950.71	811.02	849.802	633.792	542.02	765.925
AT5G59950	TCV > Mock > NES	0	2.6468	1.58786	5636.32	4856.7	5701.36	825.915	923.334	836.55	1833	1716.9	1837.39
AT5G50350	TCV > Mock > NES	0	2.06109	1.58777	1030.23	902.763	796.179	230.303	186.795	236.884	280.517	320.216	307.203
AT3G43230	TCV > Mock > NES	0	2.10297	1.58588	3810.58	3338.7	3403.92	935.962	718.805	801.763	1245.67	1140.06	1129.74
AT2G36780	TCV > Mock > NES	0	4.4854	1.58455	344.139	381.906	316.959	23.8245	9.45796	13.2523	127.73	114.716	105.301
AT2G15230	TCV > Mock = NES	0	1.71923	1.58351	1278.71	1226.01	1004.95	378.923	294.379	392.599	357.659	358.823	454.56
AT3G16857	TCV > Mock = NES	0	1.71603	1.58195	2473.93	2357.36	2260.43	639.858	640.777	877.963	744.246	731.273	893.302
AT5G36220	TCV > Mock = NES	0	1.86149	1.57978	2881.51	2798.47	2147.5	1021.05	384.23	748.754	998.464	859.965	760.098
AT5G61500	TCV > NES > Mock	0	1.19526	1.57696	2970.88	2745.79	2529.93	1271.77	1113.68	1215.9	866.095	835.741	1062.31
AT3G12070	TCV > Mock > NES	0	2.50435	1.57611	308.382	267.882	273.301	45.38	41.3786	62.9483	108.7	77.9722	98.2383
AT2G39705	TCV > Mock > NES	0	4.18236	1.57519	908.45	632.202	834.137	51.0525	36.6496	43.0699	165.68	323.244	308.035
AT2G01540	TCV > Mock > NES	0	2.52475	1.57171	1902.34	1561.75	1561.99	322.198	269.552	281.611	527.722	517.039	646.041
AT3G50830	TCV > NES > Mock	0	1.08705	1.56927	4366.45	3790.53	4016	1831.08	1979.08	1919.92	1307.03	1224.84	1570.15
AT4G17340	TCV > Mock = NES	0	1.30314	1.56821	5030.36	4754.91	3572.84	1617.8	1832.48	1962.99	1477.97	1188.51	1838.22
AT3G01175	TCV > Mock > NES	0	6.42237	1.5675	736.581	644.703	706.027	6.80699	14.1869	3.31307	340.127	255.87	108.229
AT4G29160	TCV > Mock = NES	0	1.21316	1.56715	6596.82	5917.52	5082.64	2684.22	2492.17	2413.57	1838.26	1723.71	2376.53
AT3G10500	TCV > Mock > NES	0	2.35173	1.56655	3158.46	2876.16	2622.93	606.957	481.174	607.948	1173.79	884.946	864.164
AT1G76900	TCV > NES > Mock	0	1.00662	1.56308	2115.46	1940.36	2131.37	1011.97	1015.55	1051.9	713.564	692.665	687.668
AT5G09250	TCV > NES > Mock	0	1.16726	1.56176	551.945	725.068	670.916	307.449	318.024	241.854	221.784	224.075	213.96
AT1G23120	TCV > Mock > NES	0	3.38696	1.55934	65.8013	73.2211	60.7335	2.269	3.54674	13.2523	28.9283	19.6823	19.1481
AT1G06760	TCV > Mock = NES	0	1.61726	1.55843	4843.76	4528.1	3682.92	1843.56	1119.59	1292.1	1811.96	1130.97	1489.39
AT1G23390	TCV > Mock > NES	0	4.88042	1.55726	3726.12	3567.3	3469.4	102.105	140.687	122.584	1914.53	966.703	775.916
AT4G08920	TCV > NES > Mock	0	1.33611	1.55625	8779.07	8644.56	8329.03	3632.67	3445.06	3122.57	2544.81	2807.76	3404.21
AT2G19130	TCV > Mock > NES	0	2.76318	1.55593	3839.06	2704.72	2739.65	538.887	255.365	573.161	1214.11	933.395	1009.86
AT1G21240	TCV > Mock > NES	0	6.22339	1.55523	4409.3	3900.85	3414.71	90.4332	18.9786	47.4796	1674.92	1309.62	1005.1
AT3G04520	TCV > Mock = NES	0	1.3	1.5539	1253.17	1025.99	1213.72	457.203	485.903	475.425	355.029	396.674	437.909
AT5G11520	TCV > Mock = NES	0	1.2362	1.55165	4123.87	3152.08	3371.66	1483.92	1525.1	1510.76	1226.38	1071.17	1334.54
AT5G05320	TCV > Mock > NES	0	4.61455	1.54969	434.092	318.78	293.229	9.07599	7.09347	26.5046	141.135	94.6264	121.549
AT1G15790	TCV > Mock > NES	0	4.14445	1.54929	1518.34	2040.37	1552.5	113.45	66.2057	109.331	561.033	510.983	674.347
AT5G40780	TCV > Mock > NES	0	3.2059	1.54763	3419.7	3565.51	3697.15	620.571	106.402	430.699	1063.33	1202.13	1388.66
AT1G34180	TCV > Mock > NES	0	7.45736	1.54733	1182.46	1197.43	1166.27	4.538	10.6402	4.9696	515.449	398.945	298.877
AT4G17070	TCV > Mock > NES	0	2.61069	1.54591	1932.79	2443.98	1905.51	284.759	318.024	425.729	774.927	613.179	763.428
AT5G66930	TCV > Mock = NES	0	1.34735	1.54235	1243.35	1043.85	1036.27	502.583	396.052	407.508	365.548	355.038	420.426
AT1G19660	TCV > Mock > NES	0	2.14497	1.54174	14778.8	15149.6	12739.8	4599.26	2211.98	2835.99	4077.14	3830.48	6747.64
AT1G07020	TCV > Mock = NES	0	1.38837	1.53815	494.983	485.76	470.685	190.596	166.697	197.128	164.804	172.599	162.343
AT5G10860	TCV > Mock > NES	0	2.28539	1.53553	8924.42	7456.94	7804.26	1618.93	1624.41	1717.83	3130.39	2536.74	2675.74
AT4G08470	TCV > Mock > NES	0	3.20231	1.53528	5594.09	6083.6	5423.31	669.354	439.795	748.754	2089.85	1738.86	2071.33
ATMG00510	TCV > Mock = NES	0	1.84787	1.53525	101.157	75.007	89.2024	19.2865	21.2804	33.1307	30.6815	24.2244	36.6312
AT3G03990	TCV > Mock > NES	0	2.55325	1.53292	3734.96	4165.57	4025.49	735.155	764.913	531.748	1443.78	1342.18	1335.37
AT3G07730	TCV > Mock > NES	0	2.87602	1.53237	734.617	720.603	617.774	107.777	85.1217	89.4529	255.972	214.234	246.428
AT2G41070	TCV > Mock > NES	0	2.86253	1.52968	464.537	727.746	570.326	86.2219	98.1264	57.9787	200.745	190.767	218.955
AT2G31865	TCV > Mock > NES	0	3.95496	1.52485	5036.25	4508.46	4925.11	444.724	178.519	309.772	2157.35	1538.25	1332.88
AT2G46390	TCV > Mock = NES	0	1.54008	1.52404	2949.27	3197.62	2522.34	848.605	1138.5	993.921	809.115	860.722	1344.53
AT3G52105	TCV > Mock = NES	0	1.36886	1.52149	473.376	495.582	484.919	218.958	150.145	193.815	181.459	139.29	185.654
AT4G26470	TCV > Mock = NES	0	2.07482	1.52124	170.887	225.021	193.588	58.994	29.5561	51.3526	96.4276	68.131	40.7938
AT4G13810	TCV > Mock > NES	0	3.21481	1.52029	8982.29	9846.54	8074.85	1171.94	641.8	1083.96	2880.67	2980.16	3518.23
AT1G25560	TCV > Mock = NES	0	1.91216	1.51909	1665.66	2408.26	1992.82	419.765	703.436	488.678	784.57	733.544	598.587
AT4G09830	TCV > Mock = NES	0	1.9725	1.51696	4698.41	3216.37	3871.76	941.634	1112.49	949.194	1395.57	1280.11	1442.77
AT2G19710	TCV > Mock = NES	0	1.10319	1.51242	2691.96	1951.97	2192.1	1168.53	976.535	1036.99	901.16	736.572	758.433
AT4G26060	TCV > Mock > NES	0	2.71474	1.51232	1920.02	2038.58	1561.99	301.777	212.804	326.337	506.683	626.805	801.724
AT4G26160	TCV > Mock = NES	0	1.43841	1.5074	789.615	908.12	749.679	315.391	253.001	334.62	269.997	252.842	338.006
AT2G14080	TCV > Mock > NES	0	2.01596	1.5071	4556.98	4808.48	4086.23	1329.63	965.894	1030.36	1486.74	1579.88	1665.89
AT3G63210	TCV > Mock > NES	0	4.90798	1.50696	1351.38	1446.56	1166.27	38.573	43.7431	49.696	412.009	446.637	536.148
AT1G08770	TCV > Mock = NES	0	1.63227	1.50581	733.635	687.564	716.466	222.362	226.991	240.198	258.601	246.029	248.093
AT2G28350	TCV > Mock = NES	0	1.6039	1.50556	1744.22	1848.39	1452.86	507.121	516.641	636.109	533.858	607.88	635.219
AT1G30640	TCV > Mock = NES	0	1.54968	1.50375	1442.72	1198.33	1151.09	511.659	420.879	362.781	448.827	399.702	488.694
AT2G20410	TCV > Mock = NES	0	1.69228	1.50341	928.663	1106.25	934.859	290.431	360.644	267.862	348.695	351.612	347.165
AT4G13530	TCV > Mock = NES	0	1.40184	1.50061	6027.2	5292.46	4987.74	2264.46	1773.37	2133.62	1985.53	1707.06	2070.5
AT1G53790	TCV > Mock > NES	0	2.42419	1.49898	905.504	881.332	931.88	192.865	176.155	137.492	298.049	314.16	349.662
AT1G07620	TCV > Mock = NES	0	1.8285	1.49884	2071.27	2207.35	1712.88	732.886	148.963	805.076	717.948	658.6	743.447
AT3G10910	TCV > Mock > NES	0	2.66674	1.49796	248.473	339.317	275.199	53.3215	37.8319	44.7264	149.901	75.7011	79.9226
AT5G48380	TCV > Mock = NES	0	1.98472	1.4971	14515.6	10329.5	11028.8	3695.06	2188.34	3180.55	4803.85	4029.57	3875.42
AT4G29190	TCV > Mock > NES	0	2.15206	1.49672	1352.36	980.448	1038.16	310.853	205.711	241.854	405.873	398.188	390.455
AT4G16130	TCV > Mock = NES	0	1.48387	1.49595	2963.02	2953.85	2937.98	1118.62	867.768	1179.45	987.068	931.881	1220.49
AT5G61730	TCV > Mock > NES	0	3.78147	1.49325	46.1591	44.647	57.8866	2.269	3.54674	4.9696	21.9154	15.8972	14.9855
AT2G23450	TCV > Mock = NES	0	1.88833	1.4923	3803.71	3483.36	3000.62	1120.89	801.562	856.429	1413.98	1144.6	1098.1
AT1G16180	TCV > Mock = NES	0	1.71413	1.48883	12501.3	11080.5	10674.9	3688.26	2942.61	3810.03	4207.75	3673.78	4324.15
AT4G19040	TCV > Mock = NES	0	1.20316	1.48855	1983.86	2391.29	1909.31	966.593	742.45	1020.43	722.331	730.516	786.739
AT3G56470	TCV > Mock = NES	0	1.95509	1.48852	257.312	222.342	196.435	55.5905	50.8366	67.9179	96.4276	70.4021	74.095
AT3G51890	TCV > Mock > NES	0	2.10069	1.4871	2421.88	2810.08	2307.87	728.348	448.071	581.444	918.692	841.04	929.933
AT4G23160	TCV > Mock > NES	0	5.26352	1.48669	1012.16	1147.94	859.392	33.7037	13.467	31.4062	402.939	342.843	331.642
AT4G25180	TCV > Mock = NES	0	1.2467	1.48654	836.756	637.559	626.314	288.163	295.561	301.489	260.355	219.533	269.739
AT1G23440	TCV > Mock = NES	0	1.50242	1.48546	3384.35	2816.33	2823.16	1087.98	970.623	1126.44	1122.94	900.086	1199.67
AT5G20620	TCV > Mock > NES	0	2.19897	1.48532	6173.78	7409.86	6194.94	1455.56	1165.69	1686.35	2316.89	2217.29	2530.08
AT1G26660	TCV > Mock = NES	0	1.76308	1.48525	166.958	225.914	180.303	56.725	59.1123	53.0091	70.1292	69.645	64.9371
AT3G21690	TCV > Mock = NES	0	1.59265	1.48276	12100.6	10311.7	10216.5	3640.61	2791.28	4386.5	4259.47	3614.73	3800.49
AT2G18950	TCV > Mock = NES	0	1.87099	1.48263	4379.22	4225.39	3406.77	1296.73	1009.64	977.356	1226.38	1196.83	1874.85
AT3G10400	TCV > Mock = NES	0	1.13563	1.48161	357.488	359.855	345.06	166.771	169.32	147.432	134.122	119.608	126.686
AT5G25280	TCV > Mock > NES	0	2.60911	1.47996	3906.83	4154.85	3541.52	588.805	542.651	770.289	1754.11	1255.88	1149.72
AT2G45630	TCV > Mock = NES	0	1.54058	1.47654	887.826	1149.21	840.78	346.022	292.015	351.185	357.659	320.973	355.489
AT5G07770	TCV > Mock = NES	0	1.39815	1.4761	1378.88	1666.23	1572.44	659.144	319.206	773.602	430.418	528.394	700.988
AT4G24690	TCV > Mock > NES	0	2.13657	1.4718	19688.3	21995.8	20262.2	5245.92	4155.59	4686.34	7597.62	6615.52	8120.47
AT3G08690	TCV > Mock > NES	0	2.46943	1.47134	3330.33	3133.33	2991.13	525.273	489.45	692.432	1088.76	976.545	1344.53
AT4G12300	TCV > Mock > NES	0	2.11442	1.47067	3592.55	3733.38	3080.33	852.009	630.137	921.033	1394.69	1145.36	1214.66
AT2G02040	TCV > Mock = NES	0	1.86371	1.46917	4148.43	3264.59	3327.06	967.728	919.787	1063.5	1456.06	1163.53	1259.61
AT2G29990	TCV > Mock > NES	0	3.04058	1.4684	2071.27	2377.01	1933.98	335.812	130.047	309.772	826.648	655.572	824.202
AT4G39260	TCV > Mock = NES	0	1.65611	1.46806	4685.64	3311.02	3821.47	1191.22	1203.53	1355.05	1563.88	1387.6	1320.39
AT1G59590	TCV > Mock > NES	0	3.42731	1.46765	5075.54	3822.68	4527.49	457.203	411.421	379.346	2418.58	1312.66	1123.08
AT5G63970	TCV > Mock > NES	0	2.44945	1.46615	867.202	632.202	763.914	169.04	119.407	125.897	311.198	307.347	200.639
AT1G79870	TCV > Mock = NES	0	1.20063	1.46605	1705.92	1484.96	1529.73	620.571	676.244	757.036	578.566	446.637	683.505
AT4G16957	TCV > Mock > NES	0	3.46173	1.46505	1223.71	1365.61	1165.37	119.122	112.313	109.328	427.788	427.711	504.512
AT2G02710	TCV > Mock > NES	0	2.45194	1.46205	3150.6	2535.95	2583.07	576.326	506.001	429.043	1224.63	880.404	896.632
AT5G01800	TCV > Mock = NES	0	1.52848	1.45888	3958.88	4088.77	3813.88	1447.62	1262.64	1401.43	1242.16	1227.87	1844.88
AT3G08650	TCV > Mock = NES	0	1.74423	1.45469	3068.11	3732.49	3212.23	959.786	925.698	1103.25	1264.08	1139.3	1249.62
AT5G61820	TCV > Mock = NES	0	1.5674	1.45466	10937.7	9500.89	8582.41	3526.02	2313.65	3952.49	4583.82	2711.61	3292.65
AT1G22870	TCV > Mock = NES	0	1.379	1.45408	1725.56	1801.06	1619.88	669.354	547.38	762.006	611	589.712	677.677
AT1G04400	TCV > Mock > NES	0	1.97067	1.45337	5037.23	5087.97	4710.64	1420.39	1228.35	1136.38	1927.68	1703.28	1786.6
AT4G04620	TCV > Mock > NES	0	2.96902	1.44648	2794.1	2250.21	2320.21	333.543	312.113	294.863	1070.35	884.189	747.61
AT1G29800	TCV > Mock = NES	0	1.3589	1.44385	1628.34	1279.58	1276.35	626.244	496.543	508.556	569.8	450.422	517.832
AT1G29060	TCV > Mock = NES	0	1.52081	1.44301	745.42	758.106	601.641	265.473	224.627	243.511	227.92	231.645	314.695
AT1G56150	TCV > Mock > NES	0	2.73329	1.44058	933.003	990.271	916.697	158.83	157.239	110.988	325.224	391.375	329.681
AT3G61960	TCV > Mock > NES	0	1.98488	1.43703	3617.11	3737.85	3362.17	998.359	773.188	935.942	1247.42	1243.77	1466.91
AT3G12250	TCV > Mock > NES	0	2.29986	1.43652	365.344	406.288	362.503	69.2044	73.2992	87.7963	145.518	137.776	135.702
AT1G73030	TCV > Mock = NES	0	1.32829	1.43598	4890.9	3678.02	3749.35	1745.99	1551.11	1608.5	1712.91	1417.88	1421.96
AT2G21550	TCV > Mock = NES	0	1.6005	1.43592	142.406	109.832	135.701	35.1695	33.1029	59.6353	33.3114	48.4487	61.607
AT2G46150	TCV > Mock > NES	0	2.54812	1.43564	682.565	740.248	599.744	129.333	92.2151	124.24	284.9	234.674	228.113
AT3G25020	TCV > Mock > NES	0	4.09414	1.43503	1946.83	1816.13	1931.75	110.683	72.0933	150.632	602.418	686.447	817.243
AT3G21610	TCV > Mock > NES	0	2.24829	1.43217	1693.16	1678.73	1636.96	351.695	396.052	306.459	577.689	570.787	707.648
AT1G14570	TCV > Mock = NES	0	1.54558	1.43104	3174.17	3351.21	3164.79	1085.72	1125.5	1108.22	1099.27	1124.92	1369.51
AT4G23260	TCV > Mock > NES	0	3.95067	1.42295	7108.83	6713.72	6177.43	662.152	152.63	478.666	2540.96	2457.98	2460.04
AT5G47200	TCV > NES > Mock	0	1.01382	1.42204	5988.9	5130.84	5442.29	2779.52	2835.02	2587.51	1871.57	1828.18	2480.93
AT4G16110	TCV > Mock > NES	0	2.2495	1.42195	1952.43	1696.59	1623.67	376.654	326.3	405.851	591.715	576.843	799.226
AT2G28120	TCV > Mock > NES	0	3.45577	1.41994	220.974	204.483	244.832	15.883	23.6449	21.535	137.629	62.0749	50.7842
AT3G49120	TCV > Mock > NES	0	2.42612	1.41932	37426.2	34801.5	30766.3	7419.14	4863.76	6880.65	11632.7	12944	13931.5
AT3G03120	TCV > Mock = NES	0	1.42618	1.41926	886.844	827.756	799.025	344.888	262.458	327.994	308.568	281.608	349.662
AT1G11180	TCV > Mock = NES	0	1.1966	1.41915	366.326	424.147	335.932	164.502	134.776	192.158	149.901	126.421	144.86
AT5G06960	TCV > Mock = NES	0	1.64336	1.41876	1810.03	2099.3	1829.6	583.133	636.048	617.887	655.708	678.282	812.547
AT5G33290	TCV > Mock > NES	0	3.1864	1.41872	4121.91	3944.12	3100.26	473.086	264.823	488.678	1592.81	1271.78	1312.06
AT1G07000	TCV > Mock > NES	0	2.72421	1.41846	7269.57	6424.71	5714.64	1072.1	793.287	1071.78	2328.29	2010.62	2922.17
AT2G02370	TCV > Mock > NES	0	2.39629	1.41582	1288.53	945.624	1052.4	222.362	191.524	210.38	413.762	370.936	447.067
AT5G21090	TCV > Mock = NES	0	1.06991	1.41351	18568.7	15070.2	14683.3	7901.79	7794.54	7321.88	5538.45	5195.37	7406.17
AT1G20693	TCV > Mock > NES	0	2.77679	1.41309	12120.2	8196.3	8655.48	1500.94	1288.65	1437.87	4155.15	3299.81	3424.19
AT3G01470	TCV > Mock > NES	0	2.69868	1.413	12715.4	10019.7	9077.76	1306.94	1378.5	2214.79	4032.43	3352.8	4561.42
AT3G53990	TCV > Mock = NES	0	1.51253	1.41267	2953.2	2613.64	2422.7	710.196	1116.04	974.042	1115.93	882.675	1002.36
AT5G59960	TCV > Mock > NES	0	1.82803	1.41239	2518.13	2934.2	2514.75	829.319	693.978	720.593	987.068	871.32	1134.74
AT2G45910	TCV > Mock = NES	0	1.59679	1.41218	3448.18	2618.99	3030.03	1001.76	809.838	1196.02	1165.9	1065.11	1187.18
AT4G03320	TCV > Mock > NES	0	5.28702	1.41216	1360.22	1247.44	1265.91	31.766	34.2851	33.1307	635.546	501.899	318.026
AT5G57740	TCV > Mock = NES	0	1.48358	1.41101	658.995	652.739	508.643	217.824	212.804	220.319	206.004	218.776	259.749
AT5G25560	TCV > Mock = NES	0	1.17544	1.40929	5609.8	4480.77	5518.21	2248.58	2265.18	2397.01	1911.02	1716.14	2249.49
AT5G53330	TCV > Mock = NES	0	1.39444	1.40388	2105.64	1905.53	1713.82	754.442	742.45	680.836	677.623	619.235	866.661
AT1G79985	TCV > Mock = NES	0	1.22944	1.40381	1159.87	1192.08	1046.7	464.01	516.641	468.799	422.528	398.188	463.718
AT1G20880	TCV > Mock = NES	0	1.70229	1.40323	1842.44	1684.98	1474.69	568.384	405.51	563.222	612.754	562.459	715.974
AT1G18270	TCV > Mock = NES	0	1.4048	1.40287	4347.79	3795	3756.94	1464.64	1177.52	1852.01	1530.57	1310.39	1659.23
AT4G30790	TCV > NES > Mock	0	1.07822	1.40133	3497.3	3060.58	3114.98	1663.6	1281.16	1636.4	1155.94	1191.07	1314.93
AT5G27060	TCV > Mock > NES	0	2.81536	1.40089	828.456	975.796	695.375	128.27	70.9359	155.882	250.276	273.177	423.125
AT2G01080	TCV > Mock = NES	0	1.80574	1.40023	262.223	208.948	243.883	63.532	78.0282	62.9483	90.2913	84.0283	96.5732
AT5G54660	TCV > Mock = NES	0	1.14412	1.40018	378.112	330.388	318.851	189.461	114.678	160.684	137.629	106.739	144.86
AT1G12050	TCV > Mock = NES	0	1.21727	1.39679	2501.43	2077.87	2058.3	1026.72	885.502	942.568	737.233	781.993	1001.53
AT2G38465	TCV > Mock > NES	0	3.7478	1.39547	116.871	76.7929	95.8451	5.6725	5.91123	9.93921	44.7074	29.5234	35.7987
AT1G67000	TCV > Mock > NES	0	2.8495	1.39501	285.794	247.344	299.872	36.304	37.8319	41.4134	112.207	94.6264	109.894
AT5G26040	TCV > Mock > NES	0	2.14766	1.3928	442.931	361.641	394.768	94.1634	72.117	104.362	186.719	155.944	114.056
AT3G02340	TCV > Mock = NES	0	1.62631	1.39193	1153.98	968.84	972.685	374.385	308.566	319.711	403.243	355.038	421.259
AT2G33120	TCV > Mock = NES	0	1.10583	1.39064	6957.61	5039.58	5727.96	2801.75	2746.69	2687.25	2294.75	2060.16	2405.36
AT3G14430	TCV > Mock > NES	0	1.87535	1.3896	1139.25	1036.7	960.349	257.531	307.384	289.894	317.335	345.197	534.483
AT5G01610	TCV > Mock > NES	0	2.68468	1.38732	543.106	570.589	520.031	77.1459	95.7619	81.1702	132.369	190.767	301.375
AT3G62830	TCV > Mock > NES	0	1.6628	1.38712	2819.63	2652.03	2840.24	815.705	870.133	939.255	1004.6	947.778	1225.48
AT4G04800	TCV > Mock > NES	0	2.35121	1.38661	2103.68	2646.68	2199.69	521.87	457.529	382.66	876.615	827.413	954.077
AT1G13210	TCV > Mock > NES	0	2.01671	1.38349	5481.15	5151.37	4373.76	1608.72	741.268	1358.36	2539.55	1699.49	1512.7
AT2G35680	TCV > Mock = NES	0	1.04895	1.3832	7246	6676.51	6427.31	3906.08	2641.14	3288.22	2292.35	2283.9	3225.21
AT2G19350	TCV > Mock = NES	0	1.59695	1.38271	580.426	483.081	493.46	179.251	171.426	163.997	196.362	189.253	211.462
AT3G26510	TCV > Mock > NES	0	2.25098	1.38215	3436.38	3619.96	3292.9	621.706	1077.03	475.425	1321.05	1332.33	1317.05
AT1G22710	TCV > Mock = NES	0	1.18381	1.38083	5921.13	7778.4	7121.95	3372.87	2499.27	3293.19	2753.45	2191.55	3050.38
AT5G02780	TCV > Mock > NES	0	14.9969	1.38052	383.022	257.167	340.677	0	0	0	268.244	64.346	44.124
AT1G12640	TCV > Mock = NES	0	1.4215	1.37944	3810.58	3017.25	3161.94	1253.62	1162.15	1313.63	1230.77	1253.61	1355.35
AT2G44140	TCV > Mock = NES	0	1.46475	1.37921	1308.95	1807.01	1338.98	525.273	522.187	566.535	540.871	545.048	626.669
AT5G35560	TCV > Mock > NES	0	2.20655	1.3765	3434.43	2952.06	2953.17	659.144	542.651	821.641	1269.34	1092.37	1235.47
AT5G27610	TCV > Mock > NES	0	2.02963	1.37613	522.482	497.368	489.664	117.988	115.86	135.836	191.102	192.281	198.142
AT4G29660	TCV > Mock = NES	0	1.65439	1.37521	697.297	712.566	669.967	211.017	237.631	212.036	292.789	255.87	253.088
AT1G32350	TCV > Mock > NES	0	12.2872	1.3751	2371.79	1796.6	1652.14	1.1345	0	0	1683.98	286.907	273.069
AT3G10250	TCV > Mock > NES	0	2.39816	1.3748	2851.06	2701.14	2758.63	617.168	490.632	468.799	930.088	991.685	1282.92
AT1G45150	TCV > Mock > NES	0	2.03198	1.3696	1701.01	1632.29	1558.19	372.116	378.319	445.608	611	560.188	721.801
AT1G69720	TCV > Mock > NES	0	3.34152	1.36788	1340.58	1289.41	1154.89	182.654	44.9253	145.775	426.911	470.104	569.449
AT3G43520	TCV > Mock = NES	0	1.2232	1.36784	1996.63	2234.14	1956.76	907.599	821.661	921.033	761.778	694.936	940.756
AT4G16280	TCV > Mock = NES	0	1.5387	1.3675	1815.92	2443.08	1970.99	690.91	663.24	790.167	779.311	750.198	884.977
AT4G32850	TCV > Mock > NES	0	1.59321	1.36737	3621.03	3415.5	3731.32	1227.53	972.988	1368.3	1498.13	1330.07	1345.36
AT2G21060	TCV > Mock = NES	0	1.46249	1.36697	725.778	686.671	743.986	250.724	276.645	255.106	256.848	269.496	309.7
AT5G02100	TCV > Mock > NES	0	3.35882	1.3659	1547.8	1687.66	1373.15	145.216	130.047	173.936	594.345	551.861	641.879
AT1G10290	TCV > Mock = NES	0	1.44206	1.36562	5569.54	5635.35	5884.51	1957.01	1938.88	2393.69	2144.2	2041.66	2445.97
AT1G22640	TCV > Mock = NES	0	1.3627	1.36518	1416.2	1293.87	1473.74	585.402	579.3	462.173	535.612	563.973	524.492
AT4G29380	TCV > Mock > NES	0	1.90206	1.36316	3959.86	3548.54	3584.23	1101.68	777.917	1088.34	1358.75	1325.59	1627.69
AT1G50030	TCV > Mock = NES	0	1.43276	1.36279	6751.01	6404.17	6795.51	2313.24	2106.76	2970.17	2605.3	2524.63	2627.46
AT4G16760	TCV > Mock = NES	0	1.37567	1.35893	8987.28	10359.9	8117.41	4380.3	2733.35	3470.44	3603.76	3121.91	3981.98
AT1G35560	TCV > Mock = NES	0	1.64111	1.35807	1136.3	1234.04	1048.6	384.595	365.314	346.216	382.204	417.87	533.65
AT5G11680	TCV > Mock = NES	0	1.33614	1.3578	3282.21	2685.07	2725.42	1216.18	1188.16	1038.65	1124.7	1018.18	1248.79
AT1G03400	TCV > Mock = NES	0	1.47239	1.35663	3306.76	3211.91	2919	1098.2	936.338	1366.64	1282.49	1049.97	1352.86
AT1G67520	TCV > Mock > NES	0	3.60258	1.35601	916.307	1044.74	862.606	80.5494	67.388	84.4833	490.028	355.795	257.251
AT2G38710	TCV > Mock = NES	0	1.28907	1.3553	1688.24	1669.8	1515.49	718.138	654.964	621.201	597.851	576.843	730.127
AT3G16460	TCV > Mock > NES	0	3.41071	1.35345	1612.62	979.556	1508.85	149.754	109.949	125.897	577.689	618.478	408.771
AT1G71960	TCV > Mock = NES	0	1.21242	1.35203	630.514	724.175	762.016	276.818	242.36	394.255	249.835	259.655	319.691
AT2G14825	TCV > Mock = NES	0	1.64526	1.35129	334.899	294.67	234.393	86.2219	83.9394	106.018	112.207	117.337	109.061
AT4G18210	TCV > Mock > NES	0	2.1168	1.35044	3836.12	3503	3160.99	648.934	963.53	808.389	1440.28	1403.5	1274.06
AT3G58680	TCV > Mock = NES	0	1.47495	1.34982	4769.12	4036.98	3837.6	1434.01	1713.07	1401.43	1797.06	1469.36	1694.19
AT2G37530	TCV > Mock > NES	0	5.1274	1.34968	67.7655	51.7905	41.7543	3.4035	1.18225	0	21.0388	27.2524	14.9855
AT2G17200	TCV > Mock > NES	0	2.25236	1.34942	8646.63	9489.19	8269.68	1880.49	1768.53	1892.96	3395.77	3001.7	3965.36
AT5G58200	TCV > Mock = NES	0	1.52584	1.34877	3273.37	3410.14	3026.24	1085.72	1151.51	1134.73	1195.7	1110.54	1506.04
AT3G08720	TCV > Mock > NES	0	3.55888	1.34656	3596.48	4964.75	3451.37	407.285	245.907	366.094	2012.71	1532.95	1178.03
AT5G59420	TCV > Mock = NES	0	1.53793	1.34634	5910.33	4787.95	4860.58	1851.5	1722.53	1784.09	2098.62	1917.51	2102.96
AT1G29970	TCV > Mock > NES	0	2.05292	1.3448	2098.3	2053.7	1871.63	535.047	466.494	450.109	832.893	742.156	796.49
AT3G29330	TCV > Mock > NES	0	2.20282	1.34379	216.064	184.839	210.669	41.9765	37.8319	53.0091	81.5252	71.1591	88.2479
AT2G26740	TCV > Mock = NES	0	1.15423	1.33955	7910.81	8771.14	7753.5	4265.82	3280.66	3432.49	2946.78	2969.77	3738.95
AT3G57090	TCV > Mock > NES	0	2.02499	1.33859	2807.85	2425.23	2565.99	652.337	578.118	685.805	1185.18	938.694	959.904
AT5G27930	TCV > Mock = NES	0	1.49839	1.33758	1449.59	1068.85	1117.88	495.776	377.136	414.134	477.755	447.394	513.669
AT1G80315	TCV > Mock > NES	0	2.8203	1.33589	129.759	138.617	129.059	12.4795	18.9159	24.848	65.7461	42.3926	49.2865
AT4G08500	TCV > Mock = NES	0	1.39199	1.33446	3626.65	2953.8	3250.51	1229.8	1247.27	1268.91	1374.53	1285.41	1238.41
AT2G18050	TCV > Mock > NES	0	5.91397	1.33391	1928.86	1271.55	1975.74	23.8245	10.6402	51.3526	993.205	689.637	370.475
AT1G62580	TCV > Mock > NES	0	11.5782	1.3323	29.4633	38.6241	23.6121	0	0	0	14.9025	9.84115	11.6554
AT1G58180	TCV > Mock = NES	0	1.46409	1.33129	3519.88	3074.39	2855.42	1253.62	1338.3	833.237	1051.94	1132.49	1570.98
AT5G24655	TCV > Mock > NES	0	2.09981	1.32782	273.026	299.135	331.187	73.7424	50.8366	86.1398	125.356	102.954	131.539
AT5G67490	TCV > Mock > NES	0	2.16009	1.32352	1738.33	1842.14	1624.62	409.554	422.062	332.964	663.597	676.011	740.117
AT3G57410	TCV > Mock = NES	0	1.1248	1.32317	10227.7	8997.27	9384.28	4053.57	4650.95	4414.67	3689.67	3630.63	4113.52
AT1G54210	TCV > Mock = NES	0	1.10348	1.32272	754.259	820.612	710.772	384.595	359.403	319.711	268.244	272.524	372.972
AT5G42300	TCV > Mock = NES	0	1.43349	1.32061	9666.89	10294.7	8483.71	3614.51	3507.72	3409.15	3500.32	3288.46	4599.71
AT1G76970	TCV > Mock > NES	0	2.59154	1.32052	3190.87	2737.76	2710.23	592.209	302.655	538.374	1269.34	1068.14	1121.41
AT1G01650	TCV > Mock = NES	0	1.23599	1.31903	3232.12	3568.19	3143.91	1614.39	1098.31	1509.1	1423.62	1223.33	1338.7
AT5G28010	TCV > Mock > NES	0	3.092	1.31777	167.941	157.157	132.855	17.0175	20.0982	16.5653	46.4606	68.131	69.0998
AT2G36330	TCV > Mock = NES	0	1.56859	1.31382	665.87	773.286	598.795	242.783	189.159	255.106	271.751	239.973	308.035
AT4G25800	TCV > Mock = NES	0	1.5761	1.31284	831.846	729.532	678.507	230.303	229.356	291.55	294.543	290.692	316.36
AT3G43440	TCV > Mock > NES	0	2.00651	1.31281	1155.94	1201.9	1078.02	301.777	260.094	293.207	458.47	387.59	536.98
AT1G48490	TCV > Mock > NES	0	1.93594	1.31265	4601.18	4103.95	4181.12	1218.45	968.259	1181.11	1856.67	1642.71	1688.37
AT4G18253	TCV > Mock > NES	0	2.07498	1.31224	820.061	708.995	764.863	298.373	88.6684	157.371	257.725	275.552	390.455
AT3G49490	TCV > Mock > NES	0	2.11313	1.31041	7980.61	8355.24	7259.55	1921.84	1531.01	2001.09	3180.36	2891.78	3441.67
AT5G03460	TCV > Mock > NES	0	1.82889	1.31022	3195.78	3115.47	2856.37	916.675	915.058	748.754	1198.33	1091.61	1406.97
AT4G20480	TCV > Mock = NES	0	1.31992	1.30979	1621.46	1334.05	1661.63	604.688	621.861	622.857	677.623	616.207	568.616
AT1G35710	TCV > Mock > NES	0	2.22349	1.30626	39360	29102.7	35255.8	7138.27	3631.86	11438.4	12091.1	12855.6	16993.6
AT5G38240	TCV > Mock > NES	0	1.97805	1.30502	1905.29	1805.29	1877.05	559.308	332.211	526.778	880.121	766.852	614.405
AT3G06470	TCV > Mock > NES	0	1.69669	1.30281	894.701	821.505	816.107	264.338	276.645	240.198	336.62	387.59	302.207
AT2G18680	TCV > Mock > NES	0	4.15412	1.30248	2723.82	2300.77	2215.22	231.733	60.0273	114.853	1371.34	843.742	720.126
AT5G38470	TCV > Mock = NES	0	1.36197	1.2984	6180.41	6055.92	5725.08	2348.41	2288.83	2350.62	2426.47	2227.13	2649.1
AT1G23230	TCV > Mock = NES	0	1.64063	1.29791	2094.84	2818.12	2258.53	810.032	530.828	959.134	959.017	938.694	1019.01
AT4G11920	TCV > Mock = NES	0	1.08533	1.29331	498.911	397.358	463.093	204.21	229.356	207.067	170.94	176.384	207.299
AT1G69610	TCV > Mock = NES	0	1.28012	1.29087	2941.42	2853.84	2231.01	1412.45	890.231	1002.2	1054.57	972.003	1253.79
AT4G11850	TCV > Mock > NES	0	2.11147	1.29067	4539.2	4621.64	4268.83	1166.22	686.62	1254.92	1785.01	1657.86	2046.64
AT5G61530	TCV > Mock > NES	0	2.08596	1.28866	2192.07	2484.16	2144.65	543.425	422.062	641.079	866.095	790.32	1135.57
AT5G51700	TCV > Mock = NES	0	1.58752	1.28809	863.273	795.61	847.422	270.011	287.286	276.641	348.016	327.786	350.494
AT3G14270	TCV > Mock = NES	0	1.16393	1.28783	5906.4	4863.85	5305.64	2508.38	1990.9	2675.3	2105.63	2099.95	2378.53
AT3G53230	TCV > Mock > NES	0	3.95357	1.28759	3747.73	3868.22	4016	214.42	186.795	349.529	1572.65	1274.05	1918.14
AT3G17410	TCV > Mock > NES	0	2.03419	1.28626	6542.81	6477.39	6041.09	1614.39	1376.13	1663.16	2634.23	2317.21	2863.89
AT3G01430	TCV > Mock > NES	0	1.98633	1.28458	361.416	387.536	331.187	81.6839	89.8506	101.049	166.557	162.757	114.056
AT1G35350	TCV > Mock > NES	0	2.19999	1.28437	2857.94	2569.88	2652.26	656.875	551.671	549.97	1038.6	1193.05	1085.62
AT1G21770	TCV > Mock > NES	0	1.80042	1.28409	3362.56	3470.68	2569.2	945.098	871.307	882.933	1374.14	1224.84	1261.92
AT5G57900	TCV > Mock > NES	0	2.30246	1.28096	1954.4	1927.86	1823.9	445.858	321.571	389.286	808.239	719.918	820.04
AT5G54165	TCV > Mock > NES	0	3.7907	1.28085	318.203	297.349	331.187	32.9005	18.9159	16.5653	107.824	87.8133	193.979
AT3G46440	TCV > Mock = NES	0	1.56311	1.27878	1452.54	1561.75	1281.1	527.542	462.258	463.83	514.573	539.749	715.974
AT4G26120	TCV > Mock > NES	0	4.06346	1.27852	817.114	888.476	643.396	56.725	39.0141	44.7264	342.756	305.833	319.691
AT1G61460	TCV > Mock > NES	0	3.32653	1.27802	567.789	389.756	487.041	52.187	43.7454	48.0395	243.697	185.468	166.507
AT3G53120	TCV > Mock = NES	0	1.54259	1.27731	1127.46	900.084	911.952	352.829	321.571	334.62	411.132	360.337	441.24
AT1G78670	TCV > Mock > NES	0	2.93399	1.277	5078.48	4742.41	3639.27	606.957	355.856	798.45	2231.86	1428.48	1894
AT1G23850	TCV > Mock > NES	0	2.98364	1.27645	609.889	814.362	594.999	111.181	49.6543	94.4225	196.362	347.468	289.72
AT2G42680	TCV > Mock = NES	0	1.56183	1.27449	3933.34	3483.36	3334.65	1211.65	1247.27	1182.77	1406.09	1324.01	1714.17
AT3G26500	TCV > Mock > NES	0	5.2419	1.27403	1026.3	1159.04	993.562	49.918	22.4627	11.5957	649.572	403.487	261.414
AT5G02620	TCV > Mock = NES	0	1.17317	1.27311	2009.39	2104.66	1633.16	886.044	753.09	909.438	798.596	775.18	804.222
AT1G25520	TCV > Mock = NES	0	1.40226	1.27166	3056.32	3277.98	3045.22	1242.28	1196.43	1109.88	1184.31	1112.05	1588.46
AT1G77850	TCV > Mock > NES	0	1.76739	1.27132	1049.87	900.977	875.891	299.508	287.286	243.511	353.276	348.225	469.546
AT5G02880	TCV > Mock > NES	0	1.89575	1.27	8518.81	9248.18	8564.38	2659.27	1633.86	2782.98	3507.34	3429.26	3981.98
AT1G63530	TCV > Mock > NES	0	6.68754	1.26936	475.341	653.632	531.418	5.6725	7.09347	3.31307	184.089	156.701	347.997
AT5G57340	TCV > Mock > NES	0	1.99741	1.26923	348.649	485.76	438.42	113.45	124.136	81.1702	127.109	211.963	188.984
AT5G66630	TCV > Mock > NES	0	2.18374	1.26523	1645.05	1548.23	1341.47	374.377	285.534	338.185	651.897	580.093	654.606
AT5G61900	TCV > Mock > NES	0	2.42233	1.26337	4782.14	3801.16	3841.07	869.406	820.957	627.436	1972.05	1706.38	1497.18
AT5G10710	TCV > Mock > NES	0	1.74876	1.25805	908.45	1007.24	974.583	308.584	248.272	303.146	404.119	399.702	404.608
AT5G37930	TCV > Mock = NES	0	1.22249	1.25683	733.635	820.612	714.568	343.753	312.113	316.398	305.939	292.963	350.494
AT4G02050	TCV > Mock > NES	0	2.39838	1.25627	1608.69	2154.67	1599	374.385	309.748	332.964	638.176	644.217	962.402
AT3G59940	TCV > Mock > NES	0	3.40459	1.25572	2056.54	1794.81	1868.5	141.812	262.458	135.836	1236.03	746.413	412.934
AT5G03200	TCV > Mock > NES	0	2.2011	1.25539	1235.49	1035.81	997.358	251.859	160.785	298.176	537.365	457.992	373.805
AT1G06650	TCV > Mock = NES	0	1.07059	1.25398	5057.61	5413.91	4109.95	2619.56	2028.73	2294.3	2034.62	1757.32	2321.92
AT3G56740	TCV > Mock = NES	0	1.48514	1.25254	894.701	823.291	878.738	293.835	290.832	342.903	308.568	330.057	451.23
AT1G73920	TCV > Mock = NES	0	1.01863	1.25251	2578.03	2890.45	2295.54	1393.16	1266.18	1172.83	1139.6	1006.83	1112.26
AT5G14540	TCV > Mock > NES	0	2.07329	1.25123	2557.41	2654.71	2552.71	597.881	549.744	697.401	1010.74	1059.82	1191.35
AT3G14620	TCV > Mock > NES	0	2.54447	1.24436	5432.04	5353.18	4602.46	981.342	331.029	1325.23	2040.76	2200.63	2253.65
AT1G60420	TCV > Mock = NES	0	1.44884	1.24102	2883.47	2930.63	2847.83	1154.92	919.787	1098.28	1099.27	1115.08	1450.26
AT3G18770	TCV > Mock > NES	0	1.78871	1.24099	834.792	875.082	737.343	299.508	186.795	221.976	333.99	355.038	346.331
AT3G06435	TCV > Mock = NES	0	1.43143	1.2407	126.692	142.87	145.191	49.918	59.1123	44.7264	53.4735	70.4021	51.6167
AT3G46060	TCV > Mock = NES	0	1.20423	1.24066	5244.46	4576.32	5028.55	2211.14	2185.97	2047.48	1824.24	1946.28	2513.4
AT2G35795	TCV > Mock = NES	0	1.02394	1.24039	945.771	834.006	686.099	409.554	405.51	397.568	382.204	329.3	332.178
AT2G45510	TCV > Mock > NES	0	4.83373	1.23969	1910.17	1820.6	1467.09	64.6665	41.3786	76.2006	667.979	579.871	953.244
AT2G25110	TCV > Mock = NES	0	1.47784	1.23827	2528.93	2410.94	2518.54	862.219	896.142	919.377	823.141	903.872	1434.44
AT1G10210	TCV > Mock = NES	0	1.27297	1.23576	901.576	958.125	836.035	402.747	325.117	387.629	342.756	382.291	419.594
AT3G20660	TCV > Mock > NES	0	3.73715	1.2346	427.217	291.099	439.369	28.3625	31.9206	26.5046	175.323	197.58	119.051
AT3G18440	TCV > Mock > NES	0	2.3081	1.23247	1317.99	1170.64	1003.05	214.42	222.262	268.359	561.033	475.403	449.565
AT1G28260	TCV > Mock > NES	0	2.77462	1.23165	1819.85	1709.98	1572.43	222.362	273.099	250.137	808.239	701.75	662.692
AT4G23270	TCV > Mock > NES	0	2.02539	1.22802	3853.74	3144.04	3145.81	916.675	471.716	1103.25	1503.32	1529.92	1297.08
AT1G78130	TCV > Mock > NES	0	2.05042	1.22645	837.739	676.849	774.352	217.824	144.234	190.502	338.373	304.319	335.509
AT3G14595	TCV > Mock = NES	0	1.30728	1.22581	3625.94	3012.78	3297.64	1436.28	1343.03	1235.77	1463.95	1289.19	1495.22
AT5G02290	TCV > Mock = NES	0	1.38256	1.22541	4088.52	3231.55	3518.75	1399.97	1224.81	1532.29	1666.44	1416.37	1552.66
AT1G26420	TCV > Mock > NES	0	7.28136	1.22363	1693.16	1234.94	1115.03	18.152	1.18225	6.62614	960.77	446.637	323.853
AT4G03550	TCV > Mock = NES	0	1.26049	1.22267	4840.81	4251.29	4589.18	1854.91	1748.54	2107.11	2088.1	2016.68	1757.47
AT1G27530	TCV > Mock > NES	0	1.63775	1.22259	3526.75	2777.04	2733.96	964.324	883.137	1056.87	1342.97	1221.06	1308.73
AT3G15040	TCV > Mock > NES	0	1.93776	1.22203	642.299	660.776	612.08	154.292	191.524	154.058	244.576	264.197	312.198
AT3G11410	TCV > Mock > NES	0	2.0578	1.21821	8381.31	8509.72	7139.98	2263.33	1230.72	2277.74	4214.76	2669.98	3444.17
AT5G66130	TCV > Mock > NES	0	2.79906	1.217	316.239	335.746	250.526	38.573	41.3786	49.696	155.161	133.991	99.0708
AT1G13390	TCV > Mock = NES	0	1.51335	1.21634	2687.05	2224.31	2427.44	1013.11	828.754	728.875	1021.26	959.133	1178.03
AT2G02960	TCV > Mock = NES	0	1.18254	1.21438	1958.32	1739.45	1634.11	736.29	802.745	810.046	673.24	681.31	943.254
AT4G10330	TCV > Mock > NES	0	1.60206	1.21404	904.522	967.947	856.912	313.122	286.103	299.833	338.373	361.094	477.038
AT4G29950	TCV > Mock = NES	0	1.14056	1.21344	7948.2	8691.88	7171.3	4279.33	3325.66	3195.46	3621.3	3269.53	3377.56
AT5G11090	TCV > Mock > NES	0	2.41027	1.21181	5160	4458.45	3688.61	771.459	774.371	957.477	2336.18	1940.22	1468.58
AT2G26310	TCV > Mock > NES	0	2.50831	1.21093	317.221	276.812	252.424	62.3975	28.3739	57.9787	141.135	127.935	96.5732
AT4G36650	TCV > Mock = NES	0	1.17634	1.20957	942.824	893.833	782.893	411.823	396.052	351.185	414.639	396.674	321.356
AT1G09800	TCV > Mock = NES	0	1.23176	1.2095	275.402	350.142	279.812	123.662	137.081	124.737	129.936	136.66	124.878
AT4G09760	TCV > Mock > NES	0	3.16943	1.20862	6153.89	4894.21	4006.51	609.226	461.076	602.979	2032.87	1657.85	2823.1
AT3G22430	TCV > Mock > NES	0	1.7361	1.20759	703.19	761.678	607.335	208.748	187.977	225.289	346.263	277.066	273.902
AT3G19190	TCV > Mock > NES	0	2.2895	1.20355	5686.41	5493.37	5581.79	1312.62	820.478	1295.41	2369.49	2479.97	2428.48
AT1G01680	TCV > Mock > NES	0	6.68705	1.20341	2806.87	2327.9	2236.7	37.4385	5.91123	28.1611	1212.36	1279.35	709.313
AT4G18580	TCV > Mock > NES	0	2.50224	1.20178	658.013	656.311	555.142	117.988	99.3086	112.644	276.134	237.702	298.877
AT2G04240	TCV > Mock = NES	0	1.40871	1.19812	733.635	711.673	631.059	294.97	218.715	268.359	291.913	322.487	290.552
AT2G45010	TCV > Mock > NES	0	1.59381	1.19812	1548.79	1603.72	1295.33	488.969	444.524	540.03	583.825	548.833	805.887
AT5G25120	TCV > Mock > NES	0	1.7519	1.1958	4733.76	5296.92	3888.84	1490.73	1214.17	1427.93	1931.18	2026.52	2118.78
AT5G15400	TCV > Mock = NES	0	1.2753	1.19486	4940.01	5831.79	4708.75	2244.04	1898.69	2252.89	2181.89	2154.45	2425.99
AT4G36720	TCV > Mock > NES	0	2.24435	1.19421	1081.3	1357.27	998.307	248.455	261.521	215.35	493.819	453.706	554.463
AT5G39050	TCV > Mock > NES	0	3.15728	1.19399	2350.19	2025.19	2059.25	272.28	251.818	197.128	1267.58	953.834	591.095
AT5G11610	TCV > Mock > NES	0	3.3738	1.19171	721.85	675.063	640.549	46.5145	30.7384	119.271	295.419	271.01	325.518
AT5G58375	TCV > Mock = NES	0	1.44429	1.19161	1589.05	1402.81	1122.62	602.419	462.258	447.264	625.026	584.413	591.927
AT5G65240	TCV > Mock = NES	0	1.03434	1.19133	798.421	948.294	780.014	461.839	362.888	408.904	396.208	391.366	318.858
AT5G46780	TCV > Mock = NES	0	1.20161	1.191	2934.54	2266.28	2452.12	1312.62	1163.33	851.459	1192.2	1166.55	993.205
AT4G24210	TCV > Mock > NES	0	1.82609	1.19098	1182.46	1162.61	1172.92	365.309	328.664	298.176	485.645	521.581	533.65
AT2G06255	TCV > Mock > NES	0	1.84111	1.1854	314.275	298.242	305.566	115.719	79.2104	61.2918	102.564	136.262	164.84
AT2G38180	TCV > Mock > NES	0	1.50116	1.18423	670.78	612.557	666.171	242.783	213.986	231.915	251.588	289.935	316.36
AT3G12740	TCV > Mock = NES	0	1.33452	1.18414	6794.23	5556.77	5701.36	2542.41	2063.02	2552.72	3069.03	2358.85	2516.73
AT1G10390	TCV > Mock = NES	0	1.21333	1.18371	4979.29	4841.52	4492.38	1995.58	1979.08	2198.22	2226.6	1978.83	2095.47
AT4G06676	TCV > Mock > NES	0	1.73086	1.18357	780.776	798.289	701.282	243.917	204.528	238.541	380.451	309.618	313.863
AT5G12190	TCV > Mock > NES	0	1.7018	1.18292	1136.3	1160.82	1040.06	284.759	403.146	337.933	508.437	460.263	501.182
AT1G12140	TCV > Mock = NES	0	1.06147	1.18203	2712.58	2682.39	2290.79	1204.84	1082.94	1394.8	1100.15	1024.24	1262.94
AT5G04860	TCV > Mock > NES	0	1.61812	1.18192	1263.97	1042.06	1104.59	397.075	301.473	412.477	461.976	461.02	580.272
AT5G49570	TCV > Mock > NES	0	1.66878	1.18181	2683.12	3476.22	2700.74	913.272	768.46	1104.91	1197.46	1211.98	1496.05
AT5G66200	TCV > Mock > NES	0	1.50336	1.18074	2798.03	2899.38	2842.14	880.371	1069.93	1061.84	1331.58	1182.45	1252.95
AT1G08970	TCV > Mock > NES	0	1.70012	1.17943	1756.99	1764.45	1754.63	537.753	542.651	543.343	818.758	720.675	790.069
AT3G02520	TCV > Mock > NES	0	1.50356	1.17832	6471.11	6689.02	6301.1	2321.19	2291.19	2251.23	2682.44	2720.7	3196.07
AT4G31300	TCV > Mock = NES	0	1.21325	1.17775	3347.03	3288.7	3205.59	1404.51	1435.25	1404.74	1467.45	1287.68	1595.12
AT3G11440	TCV > Mock > NES	0	2.38903	1.17614	463.555	525.942	466.889	87.3564	94.5796	96.079	227.043	188.496	228.945
AT3G05210	TCV > Mock > NES	0	1.56887	1.17599	1518.34	1756.41	1335.19	484.431	534.375	535.061	702.168	615.45	722.634
AT3G60590	TCV > Mock > NES	0	1.71089	1.17472	802.383	736.676	659.528	255.262	209.257	207.067	323.471	298.262	352.159
AT1G08460	TCV > Mock > NES	0	2.22216	1.17269	1473.16	1549.25	1275.4	329.005	295.561	296.52	675.87	541.263	689.333
AT5G06450	TCV > Mock > NES	0	1.54934	1.1714	764.08	716.138	713.619	240.514	283.739	225.289	298.926	317.945	357.154
AT3G05380	TCV > Mock > NES	0	1.94857	1.17046	1700.03	1382.27	1639.81	398.209	346.398	478.739	703.045	705.535	689.333
AT1G17640	TCV > Mock > NES	0	1.98963	1.16954	503.822	504.511	463.093	115.719	120.589	134.179	230.55	202.122	221.452
AT1G35190	TCV > Mock > NES	0	1.98064	1.16859	2081.09	1569.79	1798.28	442.455	394.87	543.343	815.252	697.207	911.618
AT3G60640	TCV > Mock > NES	0	1.94087	1.16849	877.023	880.439	828.443	249.59	190.342	233.571	362.919	367.908	419.594
AT5G35460	TCV > Mock = NES	0	1.0695	1.16807	5298.48	4637.93	4224.78	2202.06	2035.83	2509.65	2039.01	1865.28	2397.68
AT5G24670	TCV > Mock = NES	0	1.07387	1.16738	3829.24	3132.43	3509.26	1561.07	1551.11	1861.95	1589.3	1404.26	1668.39
AT3G66654	TCV > Mock > NES	0	1.51637	1.16738	2757.76	2358.26	2412.26	957.517	802.745	871.337	1097.52	1128.7	1125.58
AT5G10740	TCV > Mock > NES	0	3.26022	1.16441	2105.64	2040.37	1888.43	271.145	138.323	220.319	822.265	825.142	1044.82
AT4G08900	TCV > Mock = NES	0	1.32366	1.16154	1582.18	1479.6	1398.77	599.016	515.459	667.584	637.299	612.422	744.28
AT4G37310	TCV > Mock = NES	0	1.02853	1.16146	5133.48	4837.06	4390.84	2644.52	1612.58	2782.98	2197.67	1930.38	2292.35
AT1G59710	TCV > Mock = NES	0	1.04867	1.16132	1058.71	998.307	974.583	398.209	552.109	515.182	380.451	391.375	583.602
AT1G13470	TCV > Mock > NES	0	4.91422	1.15968	4420.47	2598.46	2787.1	153.157	21.2804	150.745	1343.85	1543.55	1501.88
AT3G58750	TCV > Mock = NES	0	1.50678	1.15922	2561.34	1915.36	2004.21	823.646	691.614	765.319	903.79	893.273	1104.76
AT5G18680	TCV > Mock = NES	0	1.19346	1.15922	1040.05	963.483	861.657	394.806	392.505	465.486	427.788	399.702	455.393
AT4G10970	TCV > Mock = NES	0	1.29965	1.15879	934.967	820.612	854.065	342.619	338.122	379.346	427.788	324.758	416.264
AT2G40420	TCV > Mock = NES	0	1.09329	1.15567	1010.59	859.009	859.759	440.186	431.52	407.508	399.736	339.141	486.196
AT2G45500	TCV > Mock = NES	0	1.38239	1.15546	1394.59	1536.75	1254.53	558.174	519.006	528.435	605.741	613.179	660.194
AT5G67600	TCV > Mock > NES	0	1.74772	1.15536	1244.33	1059.03	1354.17	383.461	351.127	354.498	595.221	505.684	541.143
AT4G22940	TCV > Mock > NES	0	2.50861	1.15492	90.354	116.082	116.722	22.69	5.91123	28.1611	49.967	39.3646	55.7793
AT1G77710	TCV > Mock = NES	0	1.24929	1.15414	4163.16	4049.48	3713.29	1677.92	1798.2	1540.58	1621.74	1663.15	2073.83
AT1G76560	TCV > Mock > NES	0	2.62207	1.15411	384.987	325.03	326.443	57.8595	50.8366	59.6353	191.102	118.094	156.515
AT1G03290	TCV > Mock > NES	0	1.67953	1.15325	5215.98	6026.45	4758.09	1851.37	1313.47	1830.26	2265.17	2192.3	2736.52
AT5G47180	TCV > Mock = NES	0	1.48979	1.15308	1452.54	1805.53	1509.8	501.449	631.319	564.878	646.065	624.534	873.321
AT1G59820	TCV > Mock > NES	0	1.52934	1.15145	4641.44	4425.41	4483.84	1654.1	1274.46	1765.87	2024.1	1944.76	2131.27
AT1G75400	TCV > Mock > NES	0	1.97039	1.14966	2487.68	2395.76	2118.08	640.992	501.272	644.392	1196.58	923.554	1035.66
AT1G01770	TCV > Mock > NES	0	1.67951	1.14891	1325.85	1006.34	1110.28	400.478	293.197	381.003	513.696	495.085	543.64
AT1G21550	TCV > Mock > NES	0	2.82359	1.1471	1152.01	901.87	960.349	145.216	143.052	137.492	539.118	490.543	331.346
AT5G22850	TCV > Mock = NES	0	1.09994	1.1469	1423.08	1202.79	1316.21	663.682	567.478	607.948	559.28	579.871	641.046
AT1G11360	TCV > Mock = NES	0	1.301	1.14614	1236.47	1122.43	1165.32	442.455	502.454	485.365	518.956	481.459	591.927
AT5G45990	TCV > Mock > NES	0	6.38442	1.14548	739.528	383.964	712.67	6.80699	3.54674	11.5957	311.198	282.365	236.438
AT5G45900	TCV > Mock = NES	0	1.32332	1.14373	1670.57	1493.89	1481.33	672.758	526.099	657.644	688.143	676.011	738.452
AT1G62610	TCV > Mock > NES	0	1.4913	1.14073	760.873	696.835	685.477	236.877	229.399	296.019	286.152	278.448	407.381
AT1G29400	TCV > Mock > NES	0	1.59942	1.13976	7824.46	7467.66	6328.62	2886.17	1590.12	2658.74	3063.77	3004.58	3743.88
AT3G53960	TCV > Mock > NES	0	1.49446	1.13934	1808.06	1509.07	1813.46	643.261	466.987	710.653	752.135	732.787	844.183
AT5G16450	TCV > Mock > NES	0	1.4912	1.13933	1165.76	1210.83	1047.65	399.344	407.875	410.821	487.398	436.039	631.056
AT5G02040	TCV > Mock > NES	0	1.83019	1.13881	1274.78	1313.52	1291.54	392.537	310.931	387.629	622.396	535.964	603.582
AT4G34310	TCV > Mock > NES	0	1.82184	1.13641	2009.39	2027.87	1736.6	557.039	443.342	632.796	895.9	870.563	860.001
AT3G06480	TCV > Mock = NES	0	1.17393	1.13608	2050.64	2559.17	2229.11	1005.17	871.315	1154.6	1147.49	999.255	964.899
AT4G11600	TCV > Mock > NES	0	1.76175	1.1353	5371.15	4451.31	4484.79	1641.62	1028.55	1548.86	2179.26	1904.64	2429.32
AT5G02800	TCV > Mock = NES	0	1.06427	1.13341	1614.59	1820.71	1619.88	903.061	759.002	755.38	799.473	729.759	775.083
AT1G57540	TCV > Mock > NES	0	1.75077	1.1322	355.523	325.923	344.473	113.45	88.6684	102.705	143.765	146.103	178.161
AT5G42220	TCV > Mock = NES	0	1.17994	1.1321	3463.9	3536.94	3682.92	1493	1357.22	1865.26	1554.24	1492.83	1827.4
AT3G14075	TCV > Mock = NES	0	1.03087	1.1318	1038.09	938.48	926.186	508.256	438.613	473.769	468.112	401.973	454.56
AT1G30810	TCV > Mock = NES	0	1.37714	1.13102	2885.43	2476.12	2404.67	1177.61	871.315	940.912	1253.56	1096.91	1195.51
AT2G24260	TCV > Mock > NES	0	1.86343	1.13098	470.43	373.249	421.339	119.122	107.584	120.927	192.855	182.44	202.304
AT5G60580	TCV > Mock = NES	0	1.0321	1.12995	849.524	777.751	747.781	374.385	387.776	399.225	348.893	338.384	397.948
AT1G77890	TCV > Mock > NES	0	1.5491	1.12764	1199.15	985.806	1053.35	366.443	388.959	351.185	519.833	477.674	484.531
AT1G02740	TCV > Mock > NES	0	2.09803	1.1276	1068.53	957.232	866.402	234.841	235.267	205.41	504.053	421.655	397.948
AT3G19895	TCV > Mock = NES	0	1.06911	1.12676	1034.16	1110.82	1035.32	529.811	482.356	503.587	467.236	466.319	522.827
AT3G61980	TCV > Mock = NES	0	1.12399	1.12672	799.436	665.241	745.884	330.139	342.851	341.246	345.386	358.066	308.868
AT5G42560	TCV > Mock > NES	0	1.36674	1.1258	1677.44	1932.32	1759.37	726.079	699.889	655.988	824.895	755.497	879.982
AT5G52750	TCV > Mock > NES	0	2.90558	1.1247	10504.6	6634.55	8188.59	1414.72	848.852	1116.5	4404.11	3574.61	3636.48
AT1G07870	TCV > Mock = NES	0	1.33886	1.12455	1024.3	887.193	907.558	393.671	346.398	374.377	397.106	433.767	462.053
AT1G49050	TCV > Mock > NES	0	1.73335	1.12425	4503.95	4880.81	4279.82	1296.73	1275.64	1537.26	1869.82	1881.93	2516.73
AT1G04970	TCV > Mock > NES	0	1.79731	1.12228	3543.45	3291.38	3258.73	1033.53	841.759	1028.71	1575.28	1325.53	1735.82
AT3G05545	TCV > Mock = NES	0	1.08988	1.12035	3171.23	3537.83	2958.86	1580.36	1454.16	1507.45	1382.42	1426.21	1638.41
AT1G55310	TCV > Mock > NES	0	2.02177	1.1202	2763.65	2583.28	2652.35	580.864	724.716	664.27	1400.83	1230.9	1048.15
AT3G54620	TCV > Mock > NES	0	1.85704	1.11825	3957.9	3641.41	3462.76	1040.34	1030.92	982.325	1800.57	1610.16	1685.04
AT2G20900	TCV > Mock = NES	0	1.20466	1.11577	1787.44	1384.95	1524.98	720.407	597.034	720.593	685.513	657.843	824.202
AT4G34030	TCV > Mock = NES	0	1.06888	1.11409	2566.25	2184.13	2114.29	1070.97	1078.21	1123.13	1151.87	962.161	1057.31
AT5G43930	TCV > Mock > NES	0	1.92059	1.11227	1457.45	1557.29	1451.91	435.648	374.772	369.407	743.369	644.217	678.51
AT3G63080	TCV > Mock > NES	0	1.46156	1.11112	2388.49	2652.03	2268.97	896.254	866.586	891.216	1087	1028.02	1268.77
AT5G19930	TCV > Mock > NES	0	1.48378	1.11025	831.846	908.12	827.494	302.911	258.912	356.155	376.944	361.094	451.23
AT4G22360	TCV > Mock = NES	0	1.21153	1.1082	1249.24	1159.93	1294.38	545.694	602.945	450.577	476.002	569.273	672.682
AT5G51740	TCV > Mock = NES	0	1.35107	1.10781	853.452	991.164	816.107	343.753	354.674	344.559	389.217	430.739	414.599
AT3G57460	TCV > Mock > NES	0	2.39425	1.10605	1007.64	1176.9	978.379	343.753	83.9394	173.936	361.165	482.973	625.228
AT1G04690	TCV > Mock = NES	0	1.19076	1.10578	4771.08	4615.61	4431.65	1820.87	2163.51	2069.01	1829.5	1929.62	2661.59
AT4G32760	TCV > Mock > NES	0	1.32992	1.10551	4976.34	4639.72	4362.37	1822.01	1805.29	1933.18	2084.59	1993.21	2418.49
AT3G12100	TCV > Mock > NES	0	1.52887	1.1045	1030.23	977.77	978.379	361.905	308.566	364.438	474.249	429.225	485.364
AT4G03450	TCV > Mock > NES	0	3.40735	1.10272	2325.63	2537.74	1854.27	260.935	75.6637	296.52	1065.96	928.096	1133.9
AT4G27320	TCV > Mock = NES	0	1.11761	1.10198	4452.88	4031.63	3997.02	1945.67	1941.25	1865.26	1726.05	1816.83	2271.97
AT1G17530	TCV > Mock > NES	0	2.34513	1.1017	2407.15	2099.3	2248.09	475.355	381.865	472.112	1195.7	1032.56	919.11
AT4G14430	TCV > Mock > NES	0	1.84562	1.0984	2472.95	2237.71	2037.42	581.998	697.525	598.009	1087.88	1036.35	1027.34
AT1G14910	TCV > Mock = NES	0	1.05884	1.09758	1685.3	1593.01	1615.13	709.062	702.254	937.599	707.428	785.021	794.231
AT1G68050	TCV > Mock > NES	0	1.55318	1.09639	308.382	335.746	286.586	96.4324	114.678	106.018	149.901	160.486	124.879
AT5G25790	TCV > Mock > NES	0	1.81288	1.0943	160.084	125.012	134.752	44.2455	27.1916	48.0395	71.8824	68.131	56.6119
AT3G50470	TCV > Mock > NES	0	1.41975	1.09235	1030.23	1072.42	1148.24	431.11	316.842	467.143	484.768	558.674	481.201
AT5G39950	TCV > Mock = NES	0	1.35781	1.0923	4769.12	4684.36	4033.09	1749.4	1798.2	1714.51	1728.68	1916.75	2679.91
AT5G49645	TCV > Mock > NES	0	2.28202	1.09126	1251.21	1402.81	1424.39	245.052	316.842	276.641	710.056	672.983	531.153
AT2G41835	TCV > Mock > NES	0	1.84718	1.09078	1012.55	844.722	766.761	277.952	221.08	230.258	504.053	372.45	355.489
AT4G25900	TCV > Mock > NES	0	1.67654	1.09035	4191.64	4370.05	3677.22	1279.72	1066.39	1482.6	1868.07	1741.13	2138.76
AT4G11740	TCV > Mock > NES	0	1.65179	1.08683	2603.57	2877.05	2488.18	930.289	762.548	843.176	1216.74	1152.93	1382
AT5G47480	TCV > Mock > NES	0	1.3135	1.08446	6253.08	5446.94	5658.66	2225.89	1980.26	2778.01	2671.92	2611.69	2902.19
AT3G14230	TCV > Mock > NES	0	1.39112	1.08207	3761.48	3913.76	3320.42	1475.98	1351.31	1364.98	1624.37	1665.42	1903.99
AT5G48670	TCV > Mock = NES	0	1.66293	1.08154	175.797	151.8	166.068	61.263	53.201	41.4134	65.7461	81.7572	85.7503
AT2G37170	TCV > Mock > NES	0	2.1677	1.08033	11124.6	12988.8	10436.9	2398.81	2739.77	2551.08	5895.28	5681.24	4763.06
AT3G10820	TCV > Mock > NES	0	1.54164	1.08016	473.376	559.874	461.195	166.771	172.608	173.936	259.478	222.561	224.782
AT4G33090	TCV > Mock = NES	0	1.03487	1.07587	8965.67	7513.2	7116.26	4004.78	3616.49	3894.51	3604.64	3513.29	4075.22
AT1G10410	TCV > Mock = NES	0	1.34448	1.07506	3538.54	3055.64	2664.68	1486.19	1119.59	1040.3	1544.6	1381.55	1468.58
AT2G26240	TCV > Mock > NES	0	1.69978	1.07134	1500.66	1231.36	1336.14	411.823	403.146	437.325	730.22	607.123	598.587
AT5G55860	TCV > Mock = NES	0	1.25803	1.07068	1933.77	1957.33	1695.79	796.418	688.067	851.459	1001.97	839.526	818.375
AT4G02370	TCV > Mock > NES	0	2.52333	1.06929	1619.5	1890.35	1596.15	291.566	321.571	274.985	888.011	733.544	811.714
AT5G19080	TCV > Mock = NES	0	1.07232	1.06912	504.804	401.823	478.276	266.607	183.248	208.723	211.264	208.178	240.6
AT3G19290	TCV > Mock > NES	0	1.64657	1.06744	3380.42	3228.87	3412.46	1158.32	1032.1	1010.49	1645.41	1489.04	1647.57
AT3G29170	TCV > Mock > NES	0	1.49987	1.06729	1323.88	1111.71	1229.85	460.607	494.179	341.246	552.267	553.375	643.544
AT1G71240	TCV > Mock = NES	0	1.19983	1.06725	1734.4	1711.77	1465.2	744.231	621.861	771.945	763.531	699.478	880.814
AT1G25500	TCV > Mock > NES	0	2.45576	1.0627	516.589	521.477	480.174	106.643	83.9394	86.1398	208.634	221.804	296.38
AT4G38260	TCV > Mock > NES	0	2.89926	1.06112	1517.36	1351.91	1230.8	176.982	182.066	190.502	620.643	502.656	841.685
AT5G12390	TCV > Mock > NES	0	2.32291	1.0596	841.667	859.009	730.7	154.292	180.884	150.745	471.619	345.197	349.662
AT2G36680	TCV > Mock = NES	0	1.27506	1.0592	1442.72	1463.53	1169.12	579.729	526.099	578.131	644.312	590.469	720.969
AT1G01420	TCV > Mock = NES	0	1.0209	1.05825	994.876	996.521	879.687	467.414	367.678	579.787	504.93	404.244	469.546
AT4G05590	TCV > Mock > NES	0	1.9926	1.05757	1588.07	1432.28	1204.23	424.303	327.482	309.772	574.183	565.487	889.972
AT5G42080	TCV > Mock = NES	0	1.03499	1.0572	9094.32	8416.86	8775.04	4002.51	4319.92	4505.77	3760.68	3687.4	5184.15
AT1G28280	TCV > Mock = NES	0	1.3473	1.05518	2296.17	1758.2	1927.34	808.898	776.735	765.319	1096.65	897.815	884.144
AT1G75850	TCV > Mock = NES	0	1.13622	1.05388	2350.19	2418.98	2257.58	1073.24	970.623	1152.95	1076.48	1048.46	1259.61
AT2G45140	TCV > Mock > NES	0	1.45201	1.05052	3250.78	3124.4	3028.14	1114.08	1138.5	1184.42	1343.85	1436.05	1759.96
AT3G47060	TCV > Mock > NES	0	1.46868	1.0502	1809.04	1691.23	1666.38	637.589	578.118	651.055	866.972	797.89	830.11
AT2G26400	TCV > Mock > NES	0	16.2742	1.04492	751.313	1077.78	548.5	0	0	0	472.495	203.636	476.206
AT4G33300	TCV > Mock > NES	0	2.39159	1.04486	15505.5	13641.4	13423.1	2796.54	2175.33	3140.79	6471.17	6250.64	7911.51
AT1G21780	TCV > Mock = NES	0	1.26246	1.04411	2499.64	2754.9	2190.79	1075.51	1002.54	1025.4	1263.59	1111.29	1235.66
AT5G26340	TCV > Mock > NES	0	6.23519	1.04045	5463.47	4756.69	4296.9	80.5494	50.8366	61.2918	3979.83	1901.61	1176.36
AT4G16070	TCV > Mock = NES	0	1.0544	1.04006	848.542	700.065	736.394	389.133	341.669	369.407	371.685	356.552	382.963
AT2G17290	TCV > Mock > NES	0	1.92406	1.039	4580.55	3694.99	3811.03	1056.22	1040.38	1088.34	2027.61	1853.92	2000.56
AT3G48320	TCV > Mock > NES	0	1.47306	1.03812	3666.05	3651.61	2882	1352.32	1137.32	1184.42	1929.43	1570.47	1466.91
AT5G16630	TCV > Mock > NES	0	1.5774	1.03807	1371.02	1381.38	1184.3	465.145	390.141	463.83	745.123	578.357	593.592
AT3G22380	TCV > Mock > NES	0	1.93661	1.03751	17029.8	16694.4	15664.5	4346.27	3102.21	5453.31	8677.61	7707.89	7675.07
AT3G57380	TCV > Mock > NES	0	3.04298	1.0374	393.826	533.085	440.318	71.4734	41.3786	53.0091	269.997	227.103	169.003
AT1G04260	TCV > Mock > NES	0	1.8599	1.03739	816.132	866.152	810.413	228.034	223.444	235.228	430.418	394.403	389.623
AT1G09645	TCV > Mock > NES	0	1.57283	1.03715	1573.34	1485.85	1233.65	453.8	532.01	457.204	675.87	619.235	796.729
AT3G20830	TCV > Mock = NES	0	1.09103	1.03642	182.672	145.549	153.732	76.0114	67.388	82.8267	81.5252	72.6731	80.7552
AT1G02305	TCV > Mock > NES	0	1.7986	1.03421	8906.74	8231.12	7650.53	2389.26	2274.64	2461.61	4134.99	3590.5	4378.26
AT1G03950	TCV > Mock = NES	0	1.07276	1.03339	871.13	917.943	731.649	400.478	393.688	404.195	378.698	355.795	497.019
AT4G23460	TCV > Mock = NES	0	1.09256	1.03304	5025.45	4445.06	4472.45	2109.03	1871.49	2557.69	2046.02	2155.97	2611.64
AT1G34300	TCV > Mock > NES	0	1.91871	1.03286	1937.7	1858.21	1596.15	496.911	400.781	528.435	801.226	792.591	1041.49
AT4G13920	TCV > Mock > NES	0	3.76079	1.02961	3869.37	4275.64	3518.7	401.798	108.925	349.703	2235.17	1903.2	1575.01
AT3G47620	TCV > Mock > NES	0	1.40315	1.02929	1052.82	1008.13	1133.06	436.782	444.524	326.337	533.858	605.609	425.422
AT3G49590	TCV > Mock = NES	0	1.40864	1.02927	1442.72	1078.67	1236.5	552.501	400.781	462.173	536.488	599.553	705.151
AT5G09310	TCV > Mock = NES	0	1.19959	1.02835	527.392	664.348	533.316	249.59	253.001	248.48	277.887	258.141	309.7
AT3G03160	TCV > Mock > NES	0	1.33219	1.02424	1320.94	1187.61	1288.69	464.01	552.109	491.991	600.481	607.123	659.362
AT1G15750	TCV > Mock > NES	0	1.26283	1.02338	15967.1	14792.4	14303.7	6303.28	5528.18	6947.51	7086.55	7052.32	8030.56
AT3G23540	TCV > Mock = NES	0	1.15572	1.02074	2250.99	2133.23	2005.16	993.821	870.133	1003.86	984.438	1000.77	1163.87
AT5G64200	TCV > Mock = NES	0	1.04504	1.01934	1759.94	1451.03	1711.93	740.828	838.212	806.732	955.51	772.152	700.988
AT5G50430	TCV > Mock = NES	0	1.04133	1.01777	1834.58	1510.86	1563.89	874.699	718.805	791.824	859.959	739.6	825.035
AT3G62010	TCV > Mock = NES	0	1.10236	1.01764	5111.87	4094.13	4373.76	2549.22	1824.2	1951.4	2070.56	2249.08	2387.69
AT1G55325	TCV > Mock > NES	0	1.33594	1.01631	3438.36	3895.01	3557.66	1471.45	1126.68	1716.17	1893.49	1802.44	1688.37
AT3G24740	TCV > Mock > NES	0	1.35441	1.01582	1656.82	1631.4	1449.06	656.875	508.366	687.462	794.213	716.89	831.695
AT4G21903	TCV > Mock > NES	0	4.01767	1.01379	372.219	315.208	294.178	38.573	7.09347	14.9088	185.842	169.571	130.707
AT4G17830	TCV > Mock > NES	0	1.34014	1.01222	2924.72	2719.9	2456.86	1122.02	964.712	1113.19	1315.8	1251.34	1449.43
AT3G09840	TCV > Mock > NES	0	2.00184	1.01191	38256.1	38033	37976.5	9203.06	8894.03	10432.9	18308.1	17056.2	21298.6
AT3G05090	TCV > Mock = NES	0	1.1914	1.0115	3566.04	3866.43	3327.06	1574.68	1546.38	1590.27	1694.5	1708.57	1933.96
AT3G63460	TCV > Mock = NES	0	1.0071	1.01019	7446.35	7274.78	7288.97	3659.89	3119.95	4171.15	3373.21	3446.67	4107.69
AT5G16120	TCV > Mock > NES	0	1.56142	1.00914	1849.31	1967.15	1663.53	744.231	584.029	528.435	1010.74	848.61	863.331
AT1G71170	TCV > Mock > NES	0	2.62224	1.00704	1281.65	1006.34	1040.06	189.461	173.79	177.249	544.378	491.3	620.233
AT1G75170	TCV > Mock = NES	0	1.15297	1.00186	3007.22	2852.94	2370.51	1305.81	1250.82	1144.67	1371.03	1185.48	1553.5
AT3G27260	TCV > Mock > NES	0	1.26663	1.00148	6018.36	6105.93	5437.55	2498.17	2084.3	2716.72	3078.67	2733.57	2959.64
AT3G12480	TCV > Mock = NES	0	1.01937	1.00043	1715.74	1448.35	1453.81	735.155	790.922	752.067	831.031	756.254	720.969
AT4G31970	TCV > Mock = NES	1.11022e-16	14.0119	14.0119	153.209	230.379	111.977	0	0	0	0	0	0
AT1G17310	TCV > Mock = NES	1.11022e-16	12.4641	12.4641	35.3559	55.3623	78.7638	0	0	0	0	0	0
AT1G29090	TCV > Mock = NES	1.11022e-16	12.3502	12.3502	39.2843	50.8976	66.4273	0	0	0	0	0	0
AT4G37860	TCV > Mock = NES	1.11022e-16	5.1881	12.0267	26.5169	46.4329	52.1929	3.4035	0	0	0	0	0
AT1G73260	TCV > Mock > NES	1.11022e-16	18.8614	10.2442	7223.41	3896.79	3167.63	0	0	0	7.88953	3.02805	0.832528
AT2G45220	TCV > Mock > NES	1.11022e-16	19.4693	8.55173	8836.03	7414.08	5525.8	0	0	0	35.0646	12.1122	10.8229
AT2G25090	TCV > Mock = NES	1.11022e-16	15.321	8.51362	522.482	295.563	409.951	0	0	0	0	0	3.33011
AT1G80160	TCV > Mock > NES	1.11022e-16	11.413	7.78624	1518.66	790.252	866.402	1.1345	0	0	7.01292	1.51402	5.82769
AT5G58170	TCV > Mock = NES	1.11022e-16	11.2205	6.30306	18.663	25.3738	27.5199	0	0	0	0.876615	0	0
AT5G10625	TCV > Mock > NES	1.11022e-16	10.848	6.26084	1464.32	638.452	1005.9	0	0	1.65653	18.4089	3.78506	18.3156
AT1G61230	TCV > Mock = NES	1.11022e-16	5.31196	6.04135	118.835	113.403	105.335	1.1345	2.36449	4.9696	3.50646	0.757011	0.832528
AT2G47270	TCV > Mock = NES	1.11022e-16	5.83536	5.93332	230.796	144.656	258.117	1.1345	8.27572	1.65653	0.876615	5.29908	4.16264
AT4G08760	TCV > Mock = NES	1.11022e-16	5.49496	5.92803	13.7495	17.8588	20.8771	1.1345	0	0	0	0	0.832528
AT1G33055	TCV > NES > Mock	1.11022e-16	3.86841	5.88949	100.175	50.8976	91.1003	5.6725	5.91123	4.9696	0.876615	1.51402	1.66506
AT1G48930	TCV > Mock = NES	1.11022e-16	10.6309	5.78532	12.7674	20.5376	14.2344	0	0	0	0	0	0.832528
AT2G37750	TCV > Mock = NES	1.11022e-16	6.13595	5.76899	2583.93	1557.29	2458.76	35.1695	43.7431	14.9088	44.7074	28.0094	48.2866
AT1G15772	TCV > Mock = NES	1.11022e-16	8.38465	5.71741	93.3003	184.839	111.028	1.1345	0	0	3.50646	3.02805	0.832528
AT2G01021	TCV > Mock = NES	1.11022e-16	5.4398	5.68988	240.617	299.135	369.146	3.4035	5.91123	11.5957	7.88953	3.02805	6.66022
AT1G68526	TCV > Mock = NES	1.11022e-16	10.553	5.6355	14.7316	16.0729	14.2344	0	0	0	0.876615	0	0
AT4G23700	TCV > Mock > NES	1.11022e-16	13.1783	5.54011	4482.34	2717.22	3594.67	1.1345	0	0	149.901	37.0936	44.9565
AT5G20940	TCV > Mock = NES	1.11022e-16	6.09044	5.37515	228.831	252.702	232.496	4.538	5.91123	0	4.38307	5.29908	7.49275
AT5G39150	TCV > Mock = NES	1.11022e-16	14.4644	5.36357	238.473	233.574	206.082	0	0	0	0	0	16.4416
AT2G24195	TCV > Mock = NES	1.11022e-16	6.64355	5.25065	45.177	44.647	26.5709	1.1345	0	0	0	3.02805	0
AT2G42140	TCV > Mock = NES	1.11022e-16	3.30644	5.23203	27.499	16.9659	18.0303	2.269	2.36449	1.65653	0.876615	0.757011	0
AT4G21840	TCV > Mock > NES	1.11022e-16	12.6462	5.13923	3340.24	2188.97	1935.55	1.1345	0	0	37.6725	50.9295	123.182
AT1G68620	TCV > Mock > NES	1.11022e-16	8.33847	5.13206	11337.5	7009.58	6847.7	34.035	10.6402	33.1307	444.444	74.1871	199.807
AT5G04210	TCV > Mock = NES	1.11022e-16	4.7572	5.09519	44.1949	77.6858	50.2949	1.1345	3.54674	1.65653	1.75323	0.757011	2.49758
AT2G15880	TCV > Mock = NES	1.11022e-16	5.52012	5.0863	240.617	392.001	232.496	7.94149	5.91123	4.9696	16.6557	3.78506	4.99517
AT4G37520	TCV > Mock > NES	1.11022e-16	7.63935	5.05576	24998.7	20582.2	16579.3	89.6254	111.131	110.988	638.176	457.235	773.418
AT4G33150	TCV > Mock = NES	1.11022e-16	4.77593	4.82045	15802.1	9350.87	10046.7	510.525	345.216	429.043	404.119	392.889	448.732
AT4G12100	TCV > Mock = NES	1.11022e-16	12.7843	4.74889	82.4971	59.827	69.2742	0	0	0	0.876615	5.29908	1.66506
AT1G55775	TCV > Mock > NES	1.11022e-16	16.2404	4.61886	979.162	672.384	670.916	0	0	0	30.6815	44.6637	19.1481
AT1G49960	TCV > Mock = NES	1.11022e-16	11.318	4.53785	27.499	19.6447	29.4178	0	0	0	1.75323	1.51402	0
AT3G49210	TCV > Mock = NES	1.11022e-16	3.97037	4.46466	3660.32	2410.94	2463.5	196.268	180.884	167.31	149.901	98.4115	138.2
AT4G37150	TCV > Mock = NES	1.11022e-16	4.09276	4.37183	3076.95	2179.67	2075.38	208.748	109.949	110.988	99.9341	114.309	139.865
AT3G09940	TCV > Mock > NES	1.11022e-16	10.9618	4.31473	2841.24	1424.24	1360.81	1.1345	0	1.65653	63.1163	77.2152	142.362
AT5G07680	TCV > Mock = NES	1.11022e-16	4.92646	4.29751	571.587	884.904	507.694	17.0175	26.0094	21.535	14.0258	24.2244	61.607
AT1G71030	TCV > Mock = NES	1.11022e-16	5.13214	4.28753	2765.62	1738.55	2166.48	105.508	53.201	31.4742	143.765	112.038	85.7503
AT4G28085	TCV > Mock = NES	1.11022e-16	4.7035	4.21882	746.402	423.254	476.379	17.0175	21.2804	24.848	32.4347	23.4674	32.4686
AT2G02930	TCV > Mock > NES	1.11022e-16	7.9979	4.20907	432.2	256.162	322.752	2.269	0	1.65653	25.4218	15.8972	13.3221
AT2G29470	TCV > Mock > NES	1.11022e-16	14.6083	4.20256	361.416	185.732	202.129	0	0	0	24.5452	5.29908	10.8229
AT5G43520	TCV > Mock = NES	1.11022e-16	11.0111	4.12988	17.678	21.4306	22.7751	0	0	0	3.50646	0	0
AT4G21850	TCV > Mock > NES	1.11022e-16	7.76727	4.11249	5016.61	2514.52	2982.59	34.035	5.91123	8.28267	182.336	149.888	275.567
AT5G64570	TCV > Mock = NES	1.11022e-16	3.61145	4.02357	12053.4	13426.3	10403.5	1075.51	1073.48	786.854	662.721	800.161	743.447
AT2G29110	TCV > Mock > NES	1.11022e-16	6.23079	4.00918	1511.47	758.106	886.33	24.959	7.09347	9.93921	96.4276	53.7478	45.789
AT3G46700	TCV > Mock > NES	1.11022e-16	13.8803	3.91746	149.28	206.269	96.794	0	0	0	1.75323	1.51402	26.6409
AT4G12080	TCV > Mock = NES	1.11022e-16	3.67649	3.9148	328.024	232.164	272.352	21.5555	15.3692	28.1611	14.9025	21.9533	18.3156
AT1G34060	TCV > Mock > NES	1.11022e-16	5.16347	3.88423	3049.45	2929.74	3149.59	124.795	35.4674	94.4225	113.96	94.6264	409.604
AT1G06030	TCV > Mock = NES	1.11022e-16	4.16823	3.81627	47.154	60.6021	43.2926	3.4035	0	4.9696	3.36357	3.87211	3.45915
AT3G26470	TCV > Mock > NES	1.11022e-16	5.66245	3.74138	2160.64	1317.98	1876.1	39.7075	46.1076	19.8784	127.109	90.0843	183.156
AT4G30270	TCV > Mock > NES	1.11022e-16	5.52793	3.6477	45683.8	23220.9	36445.8	620.571	822.843	839.863	2246.76	2389.13	3769.68
AT3G50260	TCV > Mock > NES	1.11022e-16	7.45963	3.61482	1437.81	862.58	1008.75	14.7485	2.36449	1.65653	142.012	68.131	59.942
AT1G65970	TCV > Mock > NES	1.11022e-16	7.7204	3.60459	2733.48	2080.96	1803	13.614	17.7337	0	261.231	52.9908	229.751
AT1G18980	TCV > Mock > NES	1.11022e-16	12.2595	3.56628	34.3738	64.2917	48.397	0	0	0	7.01292	4.54207	0.832528
AT1G17615	TCV > Mock > NES	1.11022e-16	14.4486	3.55667	168.923	305.386	196.435	0	0	0	13.1492	19.6823	24.1433
AT3G48180	TCV > Mock = NES	1.11022e-16	4.4488	3.54075	109.996	112.51	115.773	9.07599	4.72898	1.65653	7.01292	12.8692	9.1578
AT3G15500	TCV > Mock > NES	1.11022e-16	7.24695	3.49625	673.726	329.495	524.776	3.4035	0	6.62614	86.7849	30.2805	18.3156
AT5G64190	TCV > Mock > NES	1.11022e-16	11.1881	3.48373	1210.94	620.594	885.381	1.1345	0	0	125.356	99.1685	18.3156
AT3G50940	TCV > Mock = NES	1.11022e-16	3.74517	3.47517	358.47	458.078	374.84	41.9765	15.3692	31.4742	37.6944	38.6076	30.8035
AT4G19170	TCV > Mock = NES	1.11022e-16	2.88293	3.46819	9299.59	10075.9	7052.68	1579.22	1059.29	944.225	561.033	747.17	1079.79
AT5G52730	TCV > Mock > NES	1.11022e-16	7.8112	3.42294	131.603	231.272	164.17	1.1345	1.18225	0	14.9025	7.57011	26.6409
AT2G43270	TCV > Mock = NES	1.11022e-16	6.53654	3.41694	28.4811	47.3258	32.2647	1.1345	0	0	3.50646	0.757011	5.82769
AT5G03435	TCV > Mock = NES	1.11022e-16	3.77295	3.40041	46.1591	75.007	53.1418	1.1345	8.27572	3.31307	2.62984	3.02805	10.8229
ATMG00520	TCV > Mock = NES	1.11022e-16	3.22352	3.39939	121.781	71.4352	92.0492	5.6725	8.27572	16.5653	8.76615	9.08414	9.1578
AT2G47200	TCV > Mock > NES	1.11022e-16	13.6025	3.38939	146.334	121.44	105.335	0	0	0	16.6557	10.5982	8.32528
AT2G28110	TCV > Mock > NES	1.11022e-16	4.38585	3.37454	2220.55	2068.94	1921.65	106.643	91.0329	99.3921	210.388	203.636	184.821
AT1G72200	TCV > NES > Mock	1.11022e-16	2.2448	3.37004	144.37	175.016	121.467	32.9005	23.6449	36.4438	10.5194	12.1122	19.9807
AT5G43170	TCV > Mock = NES	1.11022e-16	2.92214	3.33714	162.048	101.795	143.293	17.0175	11.8225	24.848	14.9025	12.8692	12.4879
AT2G07674	TCV > Mock = NES	1.11022e-16	4.65847	3.31492	36.338	43.7541	34.1626	0	1.18225	3.31307	3.50646	3.78506	4.16264
AT3G61060	TCV > Mock = NES	1.11022e-16	3.67713	3.31434	2870.7	1887.68	2750.09	214.42	223.444	149.088	277.01	234.674	243.098
AT4G33467	TCV > Mock > NES	1.11022e-16	12.638	3.28119	71.6939	76.7929	42.7033	0	0	0	15.7791	3.02805	0.832528
AT2G32530	TCV > Mock = NES	1.11022e-16	3.38972	3.27976	5551.55	4779.91	3160.28	474.445	418.515	394.255	507.56	389.862	491.746
AT3G62590	TCV > Mock = NES	1.11022e-16	3.28531	3.27937	1898.42	1836.78	1530.67	193.999	140.687	205.41	192.855	152.159	197.309
AT5G44990	TCV > Mock > NES	1.11022e-16	9.48989	3.18942	324.096	215.199	297.974	1.1345	0	0	56.1033	18.1683	17.4831
AT5G26700	TCV > Mock = NES	1.11022e-16	4.33709	3.17131	34.3738	28.5741	27.5199	1.1345	0	3.31307	3.50646	1.51402	4.99517
AT3G22600	TCV > Mock > NES	1.11022e-16	11.3767	3.07704	6604.68	4528.99	4042.57	0	2.36449	3.31307	1174.66	274.038	349.662
AT1G67810	TCV > Mock > NES	1.11022e-16	6.92982	3.0569	1213.89	588.448	744.935	4.538	4.72898	11.5957	120.096	71.9161	114.056
AT5G43780	TCV > Mock = NES	1.11022e-16	3.25624	3.04484	5121.7	6482.75	4271.27	594.478	305.019	762.006	540.871	400.459	982.383
AT1G08315	TCV > NES > Mock	1.11022e-16	2.37772	3.00807	513.643	419.682	371.044	83.9529	87.4862	79.5137	61.363	49.9627	50.7842
AT4G37430	TCV > Mock = NES	1.11022e-16	2.44572	3.00567	6033.09	3993.23	3879.35	880.371	688.067	983.982	442.69	651.787	636.884
AT4G29850	TCV > Mock > NES	1.11022e-16	4.16437	3.00269	426.894	497.538	377.668	26.6414	26.8003	19.1479	27.1321	41.9172	93.3838
AT5G46115	TCV > Mock = NES	1.11022e-16	2.34043	3.00039	101.157	150.907	115.773	22.69	20.0982	29.8176	21.0388	9.08414	15.818
AT5G57887	TCV > Mock = NES	1.11022e-16	2.49044	2.9967	459.371	369.401	302.055	75.2457	82.7465	43.2157	43.4398	55.7872	42.4239
AT1G52890	TCV > Mock > NES	1.11022e-16	4.18918	2.9817	3921.56	2402.9	2523.29	271.145	94.5796	119.271	575.059	320.216	224.782
AT1G68200	TCV > Mock > NES	1.11022e-16	4.20164	2.98136	169.905	182.16	135.701	11.345	11.8225	3.31307	17.5323	24.2244	19.9807
AT3G51660	TCV > Mock > NES	1.11022e-16	4.67854	2.97474	1903.33	1850.17	1015.39	77.1459	54.3833	54.6656	255.095	181.683	169.836
AT2G35910	TCV > Mock = NES	1.11022e-16	2.30259	2.93659	144.37	96.4376	105.335	24.959	23.6449	21.535	21.0388	16.6542	7.49275
AT1G22900	TCV > NES > Mock	1.11022e-16	1.78847	2.93431	104.104	150.014	96.794	31.766	20.0982	49.696	12.2726	21.9533	11.6554
AT2G27389	TCV > Mock > NES	1.11022e-16	8.35897	2.93396	1073.44	643.81	745.884	2.269	3.54674	1.65653	241.069	45.4207	35.7987
AT3G57540	TCV > Mock > NES	1.11022e-16	3.77166	2.91966	1481.02	1343.88	1118.83	103.239	57.93	127.553	183.212	125.664	212.295
AT1G75380	TCV > Mock = NES	1.11022e-16	2.96366	2.91946	12148.7	12153.8	9604.44	2199.79	801.562	1345.11	794.213	874.348	2813.11
AT3G26180	TCV > Mock = NES	1.11022e-16	3.16236	2.91161	8932.17	6564.13	7355.55	890.37	853.728	808.323	1286.53	849.556	900.861
AT5G10760	TCV > Mock > NES	1.11022e-16	6.80448	2.90449	34639	21377	26332.7	373.25	60.2945	303.146	2337.05	2726.75	5934.26
AT5G44460	TCV > Mock > NES	1.11022e-16	13.8431	2.88796	137.495	201.805	101.539	0	0	0	5.25969	15.1402	39.1288
AT4G25070	TCV > Mock > NES	1.11022e-16	5.13343	2.88439	539.178	642.917	331.187	21.5555	8.27572	13.2523	24.5452	69.645	110.726
AT4G05320	TCV > Mock = NES	1.11022e-16	2.12625	2.87729	186860	129559	154352	33391	31963.9	42476.4	23813.6	17969.8	22287.5
AT3G25010	TCV > Mock > NES	1.11022e-16	7.53433	2.86222	14262.4	8695.35	8990.39	76.0114	20.0982	76.2006	698.623	1084.09	2610.98
AT5G37600	TCV > Mock > NES	1.11022e-16	5.86608	2.85903	35891.2	22962.9	28197.4	663.682	242.36	586.413	3104.97	3669.23	5224.11
AT1G24140	TCV > Mock = NES	1.11022e-16	3.48418	2.82503	3981.47	2526.13	2931.34	370.981	122.954	349.529	674.117	373.964	283.892
AT2G23830	TCV > Mock > NES	1.11022e-16	13.8215	2.80273	192.493	108.939	132.855	0	0	0	31.5581	18.1683	12.4879
AT2G26440	TCV > Mock = NES	1.11022e-16	2.72607	2.79615	1712.8	1640.33	1615.13	262.069	144.234	344.559	184.966	225.589	304.705
AT2G32830	TCV > Mock > NES	1.11022e-16	5.17185	2.7901	127.674	140.192	75.9169	4.538	0	4.9696	14.0258	18.1683	17.4831
AT1G23050	TCV > Mock = NES	1.11022e-16	3.69457	2.78674	98.2109	110.725	102.488	7.94149	9.45796	6.62614	14.9025	14.3832	15.818
AT2G25440	TCV > Mock > NES	1.11022e-16	8.85589	2.77879	2297.15	1751.06	1202.33	6.80699	1.18225	3.31307	468.112	127.935	169.003
AT5G26690	TCV > Mock > NES	1.11022e-16	5.57475	2.76434	1367.1	1945.72	1635.06	40.842	8.27572	54.6656	191.102	207.421	329.681
AT2G15080	TCV > Mock > NES	1.11022e-16	4.05615	2.75773	4796.62	7124.77	4827.37	395.94	186.795	424.073	693.402	778.965	1004.03
AT2G30230	TCV > Mock = NES	1.11022e-16	3.03597	2.74578	766.045	490.224	493.46	56.725	96.9441	59.6353	75.3889	85.5423	99.9033
AT3G48840	TCV > Mock > NES	1.11022e-16	6.07601	2.73245	57.9444	113.403	98.692	1.1345	1.18225	1.65653	15.7791	18.1683	6.66022
AT2G15390	TCV > Mock > NES	1.11022e-16	4.69492	2.72613	3501.22	2557.38	2633.37	187.192	14.1869	134.179	629.409	360.337	323.853
AT4G38830	TCV > Mock = NES	1.11022e-16	5.85647	2.72436	23.5706	26.7882	17.0813	1.1345	0	0	5.25969	0.757011	4.16264
AT5G13800	TCV > Mock = NES	1.11022e-16	2.9717	2.71871	14250.4	12945	10801.1	1859.44	1360.76	1623.4	1793.55	1487.53	2490.92
AT5G10946	TCV > Mock = NES	1.11022e-16	2.46009	2.69364	1352.36	1664.44	956.553	246.186	292.015	183.875	201.621	212.72	199.807
AT5G25770	TCV > Mock = NES	1.11022e-16	2.59609	2.69118	3044.54	1935.89	2586.87	475.355	348.762	427.386	312.951	355.038	503.679
AT2G44290	TCV > Mock = NES	1.11022e-16	2.88445	2.64903	7683.03	5289.78	5148.11	788.477	605.31	1060.18	973.042	823.628	1092.28
AT3G17770	TCV > Mock = NES	1.11022e-16	2.74124	2.58853	3782.1	3208.33	3272.02	436.782	607.674	490.334	631.163	582.142	492.856
AT4G28240	TCV > Mock = NES	1.11022e-16	2.7602	2.57413	1075.41	1231.36	930.931	154.292	184.43	139.149	141.135	162.757	239.768
AT1G71400	TCV > Mock = NES	1.11022e-16	2.44954	2.57018	319.185	263.417	282.79	46.5145	55.5655	56.3222	67.4993	50.7198	27.4734
AT5G35580	TCV > Mock > NES	1.11022e-16	4.29605	2.56712	215.082	144.656	244.832	5.6725	11.8225	13.2523	26.2984	34.0655	41.6264
AT5G55560	TCV > Mock > NES	1.11022e-16	4.28425	2.54888	1082.28	900.977	910.054	52.187	44.9253	51.3526	197.238	150.645	146.525
AT1G63370	TCV > Mock = NES	1.11022e-16	1.5603	2.54849	59.0061	57.1553	39.2377	14.2992	20.8359	17.5377	7.24785	9.98422	9.30599
AT1G09070	TCV > NES > Mock	1.11022e-16	1.31085	2.53437	53029.9	33340.6	38063.8	18606.9	17016.1	14534.4	8213.88	6586	6679.37
AT1G09500	TCV > Mock > NES	1.11022e-16	4.35184	2.52053	182.672	248.237	144.242	17.0175	1.18225	9.93921	58.7332	18.1683	23.3108
AT5G04220	TCV > Mock = NES	1.11022e-16	2.42257	2.49497	1295.4	1097.42	971.736	250.724	187.977	188.845	247.205	167.3	182.324
AT1G63800	TCV > Mock = NES	1.11022e-16	2.99871	2.49283	6330.67	4623.65	4071.04	807.763	515.459	556.596	687.266	619.235	1362.85
AT1G70290	TCV > Mock = NES	1.11022e-16	2.83356	2.47221	2625.18	1877.85	3105	399.344	432.702	235.228	526.845	458.749	385.46
AT1G74940	TCV > Mock > NES	1.11022e-16	3.77727	2.4664	788.633	667.026	599.744	52.187	49.6543	48.0395	87.6615	130.206	154.018
AT4G32250	TCV > NES > Mock	1.11022e-16	1.6634	2.45174	3582.73	4787.05	2963.61	1208.24	1042.74	1326.88	716.194	616.964	738.452
AT1G49000	TCV > Mock = NES	1.11022e-16	2.82941	2.43709	672.744	533.085	487.766	88.4909	52.0188	97.7356	137.629	97.6545	77.4251
AT3G10740	TCV > Mock = NES	1.11022e-16	2.0621	2.40032	8953.88	6117.53	6077.15	1769.82	1747.36	1547.2	1326.32	1279.35	1400.31
AT2G29120	TCV > Mock > NES	1.11022e-16	3.60448	2.39081	11009.4	7787.33	8299.62	858.816	477.627	891.216	1674.33	1545.82	1946.45
AT5G24090	TCV > Mock > NES	1.11022e-16	7.66479	2.38851	118.835	115.189	108.182	0	0	1.65653	22.792	15.8972	26.6409
AT5G13820	TCV > Mock > NES	1.11022e-16	3.42569	2.38132	2917.84	2173.42	2382.84	276.818	203.346	215.35	525.969	473.132	435.412
AT4G15270	TCV > Mock > NES	1.11022e-16	7.3858	2.37841	219.992	146.442	192.639	0	0	3.31307	39.4477	43.9067	24.1433
AT2G14560	TCV > Mock > NES	1.11022e-16	3.12235	2.36473	33556.7	30818	26142	3014.36	684.52	6695.71	3036.59	4999.3	9538.27
AT1G72890	TCV > Mock > NES	1.11022e-16	3.70746	2.3635	1621.46	1326.91	1441.47	108.912	94.5796	132.523	246.329	302.805	303.873
AT1G71130	TCV > NES > Mock	1.11022e-16	1.87864	2.3553	693.369	582.197	567.479	163.368	148.963	188.845	135.875	121.879	102.401
AT5G61490	TCV > Mock > NES	1.11022e-16	5.41231	2.34453	187.583	233.95	185.996	4.538	4.72898	4.9696	37.6944	38.6076	43.2914
AT1G27980	TCV > Mock > NES	1.11022e-16	3.96685	2.34251	4236.82	4644.18	3500.72	288.163	202.164	301.489	759.148	713.862	968.23
AT2G29090	TCV > Mock > NES	1.11022e-16	4.10519	2.31517	2692.94	2043.05	2126.62	186.058	93.3974	119.271	328.731	405.001	645.209
AT4G01720	TCV > Mock = NES	1.11022e-16	2.74746	2.2776	1711.82	1247.44	1310.52	284.759	173.79	177.249	269.121	338.384	273.069
AT3G15353	TCV > NES > Mock	1.11022e-16	1.04885	2.26638	51717.8	56846.4	42912	23530.6	21596.1	28089.9	10444	6894.86	14145.5
AT4G09770	TCV > Mock > NES	1.11022e-16	7.21051	2.24307	603.997	482.188	494.409	5.6725	0	4.9696	63.1163	73.4301	197.309
AT1G70810	TCV > Mock > NES	1.11022e-16	4.37778	2.24299	3264.53	3227.09	2401.82	221.227	75.6637	130.866	654.831	575.329	648.539
AT1G55610	TCV > Mock > NES	1.11022e-16	3.00244	2.2386	757.206	921.514	1006.85	113.45	104.038	117.614	189.349	199.851	179.826
AT4G19970	TCV > Mock > NES	1.11022e-16	9.27651	2.22641	220.974	312.529	218.261	0	1.18225	0	96.4276	57.5329	6.66022
AT3G03520	TCV > NES > Mock	1.11022e-16	1.69066	2.22622	593.194	545.587	586.458	149.754	131.229	253.45	113.083	91.5984	164.008
AT4G04540	TCV > Mock > NES	1.11022e-16	7.3188	2.2161	723.244	383.775	531.777	4.86133	3.69215	1.68138	170.806	106.742	75.1339
AT1G69450	TCV > Mock = NES	1.11022e-16	2.64302	2.20294	2962.04	2345.75	2048.81	470.817	244.725	462.173	493.534	430.739	673.515
AT5G48657	TCV > Mock > NES	1.11022e-16	3.94002	2.19222	3176.14	2091.27	2148.45	271.145	49.6543	162.34	603.988	579.114	439.575
AT4G14746	TCV > Mock = NES	1.11022e-16	2.26794	2.1876	1682.35	1108.14	1509.8	258.666	347.58	286.581	286.653	287.664	369.642
AT4G24040	TCV > Mock = NES	1.11022e-16	2.16253	2.16892	761.134	859.902	825.596	193.999	161.968	190.502	191.102	158.972	193.979
AT1G11910	TCV > Mock = NES	1.11022e-16	2.49038	2.15245	57252	58098.3	49472.2	10410.2	8389.21	10532.2	12212.1	10376.4	14485.1
AT1G64610	TCV > Mock = NES	1.11022e-16	2.65037	2.14889	2938.47	1898.39	2044.06	444.724	296.744	354.498	553.144	498.87	499.517
AT1G22930	TCV > Mock = NES	1.11022e-16	2.24337	2.12852	40875.4	38969.7	34506.1	9301.76	6650.13	8198.19	8654.82	7402.06	10094.4
AT3G01080	TCV > Mock = NES	1.11022e-16	1.6452	2.12684	453.734	518.798	398.564	156.561	102.855	178.906	92.0446	121.122	100.736
AT4G25380	TCV > Mock = NES	1.11022e-16	4.06226	2.12152	35.3559	25.0023	34.1626	1.1345	1.18225	3.31307	7.01292	11.3552	3.33011
AT2G38640	TCV > Mock = NES	1.11022e-16	2.2948	2.11958	2498.48	1993.04	1989.97	411.823	446.889	462.173	472.495	451.179	567.784
AT1G80460	TCV > Mock = NES	1.11022e-16	2.12096	2.11604	5662.84	4954.93	4816.93	1177.61	1159.78	1210.93	1154.5	1102.21	1303.74
AT5G57660	TCV > NES > Mock	1.11022e-16	1.49133	2.11314	10759	8492.76	8492.25	3439.8	3383.59	3044.71	2176.63	2049.99	2186.22
AT3G11690	TCV > Mock = NES	1.11022e-16	1.91716	2.10369	439.985	680.421	533.316	116.853	170.243	150.745	134.122	99.9255	150.687
AT5G64230	TCV > Mock = NES	1.11022e-16	2.48239	2.10044	1009.61	1084.92	827.494	192.865	147.781	182.219	291.913	218.776	170.668
AT3G11580	TCV > Mock = NES	1.11022e-16	2.46276	2.09715	769.973	892.94	707.925	216.689	120.589	92.766	120.973	223.318	209.797
AT5G02380	TCV > NES > Mock	1.11022e-16	1.14873	2.07638	50358.6	39841.2	42639.7	21619	17593	20701.7	8978.29	7895.63	14623.3
AT3G03870	TCV > Mock > NES	1.11022e-16	2.90367	2.0583	8451.04	5413.9	6234.68	973.4	690.431	1022.08	2003.06	1463.3	1359.52
AT4G39140	TCV > Mock > NES	1.11022e-16	2.42042	2.04083	2844.19	2672.57	2335.39	496.911	464.622	505.243	622.396	529.908	755.935
AT3G57520	TCV > Mock > NES	1.11022e-16	3.51101	2.03955	5680.52	6453.28	5743.11	482.162	650.235	435.669	2109.14	1154.44	1084.78
AT3G46070	TCV > Mock > NES	1.11022e-16	13.4966	2.02631	107.05	142.87	96.794	0	0	0	49.967	23.4674	11.6554
AT5G47590	TCV > Mock > NES	1.11022e-16	4.21237	2.0115	1034.16	717.924	750.628	35.1695	65.0235	34.7872	213.017	152.916	254.753
AT4G23880	TCV > Mock = NES	1.11022e-16	2.39148	1.99899	1479.06	958.125	1087.51	218.958	200.982	251.793	273.504	278.58	329.681
AT1G51890	TCV > Mock > NES	1.11022e-16	9.74149	1.97848	4547.16	4721.87	3385.89	9.07599	2.36449	3.31307	1499.89	1021.21	690.165
AT3G13380	TCV > Mock > NES	1.11022e-16	3.68061	1.97711	3671.12	2902.06	2838.34	267.742	262.458	203.754	824.018	788.049	778.413
AT3G17000	TCV > Mock = NES	1.11022e-16	1.75164	1.97315	4529.48	3911.97	3621.24	1277.45	1105.4	1199.33	980.932	909.171	1182.19
AT5G19860	TCV > Mock = NES	1.11022e-16	2.12441	1.96817	5385.88	5017.43	4177.33	1193.49	1043.92	1106.57	1157.13	983.358	1585.96
AT5G54730	TCV > NES > Mock	1.11022e-16	1.30865	1.9662	3158.46	2128.77	2433.14	1199.17	902.053	1015.46	593.468	597.282	785.073
AT3G48120	TCV > Mock = NES	1.11022e-16	1.85111	1.96429	494.983	436.648	444.114	116.853	141.869	122.584	128.862	111.281	112.391
AT3G50740	TCV > Mock = NES	1.11022e-16	2.29415	1.94848	1115.68	1054.56	789.536	246.186	100.491	256.763	320.841	219.533	226.447
AT1G21410	TCV > NES > Mock	1.11022e-16	1.43182	1.94651	2027.07	2461.84	1817.26	765.787	756.637	815.015	645.188	465.562	525.325
AT5G24200	TCV > Mock > NES	1.11022e-16	7.47632	1.93601	4820.19	4477.2	3222.67	32.9005	14.1869	23.1915	600.481	560.188	2111.29
AT1G57650	TCV > Mock > NES	1.11022e-16	5.97616	1.93484	278.919	283.955	224.904	6.80699	2.36449	3.31307	105.194	74.1871	26.6409
AT4G00030	TCV > Mock = NES	1.11022e-16	1.70144	1.88329	912.379	1009.02	932.829	279.087	250.636	347.872	292.789	220.29	260.581
AT1G68820	TCV > Mock = NES	1.11022e-16	2.2719	1.85322	2993.47	2071.62	2520.44	575.191	466.987	528.435	809.115	668.441	621.898
AT4G04925	TCV > Mock > NES	1.11022e-16	3.33929	1.84529	384.004	379.5	341.626	36.304	33.1029	39.7568	113.083	87.0563	107.396
AT3G27190	TCV > Mock = NES	1.11022e-16	1.77359	1.83301	319.185	347.354	294.178	123.66	74.4815	82.8267	66.6227	101.44	101.568
AT3G52420	TCV > Mock = NES	1.11022e-16	1.91069	1.80626	368.291	362.534	340.677	96.4324	95.7619	92.766	95.551	98.4115	112.391
AT1G07130	TCV > Mock = NES	1.11022e-16	1.61992	1.79492	140.442	128.583	130.957	38.573	48.4721	43.0699	38.5711	40.8786	35.7987
AT5G49665	TCV > Mock = NES	1.11022e-16	2.28466	1.79148	629.532	408.967	521.929	117.988	111.131	91.1094	140.258	150.645	159.845
AT5G39030	TCV > Mock > NES	1.11022e-16	2.55616	1.79015	3332.29	3128.86	2535.62	637.589	373.59	518.495	902.037	766.852	932.431
AT1G32170	TCV > Mock > NES	1.11022e-16	3.76496	1.7869	801.401	698.279	577.917	61.263	56.7478	34.7872	171.816	210.449	219.787
AT3G51840	TCV > Mock = NES	1.11022e-16	1.9619	1.78596	15593.9	12716.4	13299.7	3469.3	3755.99	3455.53	4346.26	3623.06	4096.87
AT3G10930	TCV > Mock = NES	1.11022e-16	1.45158	1.7771	5535.16	4046.81	4394.64	2305.3	1597.21	1207.61	1568.26	1498.13	1011.52
AT1G66880	TCV > Mock = NES	1.11022e-16	2.38138	1.77008	12501.3	8593.66	9232.44	2244.04	1308.75	2267.8	3036.59	2996.25	2858.9
AT1G14900	TCV > Mock = NES	1.11022e-16	1.58301	1.75979	267.134	372.356	324.545	93.0289	127.683	101.049	92.9212	89.3273	102.401
AT3G06170	TCV > Mock = NES	1.11022e-16	1.89376	1.75408	3011.14	2345.75	2346.78	687.506	572.207	813.359	752.135	660.871	870.824
AT1G06645	TCV > Mock = NES	1.11022e-16	1.7222	1.75382	1125.5	1287.62	896.768	412.958	275.463	314.742	301.555	270.253	409.604
AT1G62790	TCV > NES > Mock	1.11022e-16	1.08912	1.75146	495.965	370.57	444.114	198.537	202.164	215.35	107.824	116.58	164.84
AT5G15190	TCV > Mock = NES	1.11022e-16	2.05335	1.73207	591.229	465.222	583.611	154.292	109.949	130.866	173.57	146.103	173.998
AT3G16720	TCV > Mock = NES	1.11022e-16	1.50077	1.72274	2862.85	2028.76	2349.63	852.009	770.824	935.942	957.263	739.6	497.019
AT2G27690	TCV > Mock > NES	1.11022e-16	2.55452	1.71892	274.008	373.249	248.628	57.8595	53.201	41.4134	83.2784	76.4581	112.391
AT5G41750	TCV > Mock > NES	1.11022e-16	3.5888	1.71503	17228	12531.1	12055.9	1548.76	819.024	1107.52	6053.46	4436.4	2246.83
AT5G18490	TCV > Mock = NES	1.11022e-16	1.88178	1.69755	1616.55	1197.43	1244.09	400.478	351.127	349.529	485.645	371.693	393.786
AT2G41410	TCV > Mock > NES	1.11022e-16	2.67853	1.69226	24243.3	15683.6	18336.8	2993.94	2913.05	3193.8	6372.99	5608.7	6047.48
AT2G37770	TCV > Mock > NES	1.11022e-16	6.39856	1.68039	802.383	1445.67	786.689	22.69	0	13.2523	316.458	257.384	372.972
AT3G11780	TCV > NES > Mock	1.11022e-16	1.22081	1.67753	2654.64	2405.58	2529.93	1040.34	1210.62	1005.52	767.915	669.955	934.928
AT2G31990	TCV > Mock = NES	1.11022e-16	1.54263	1.67052	571.587	617.022	523.827	245.052	198.617	144.119	195.485	189.253	153.185
AT1G62840	TCV > Mock > NES	1.11022e-16	3.90848	1.6627	478.924	351.818	391.921	32.9005	23.6449	24.848	147.271	109.01	129.874
AT1G55280	TCV > Mock = NES	1.11022e-16	1.43552	1.66263	591.229	572.375	549.449	248.455	192.706	192.158	181.459	150.645	208.964
AT2G38410	TCV > Mock > NES	1.11022e-16	2.10381	1.66045	2580	2401.12	2372.4	601.285	521.37	588.07	843.303	749.441	733.457
AT5G59400	TCV > NES > Mock	1.11022e-16	1.07918	1.64666	1074.43	869.724	761.067	441.32	423.244	415.79	303.309	288.421	272.237
AT5G10650	TCV > Mock > NES	1.11022e-16	2.55787	1.63808	3338.19	3604.8	2844.99	540.022	530.828	591.383	1019.5	912.199	1212.99
AT5G01550	TCV > Mock > NES	1.11022e-16	7.6659	1.62939	1438.79	1045.63	1325.7	4.538	5.91123	8.28267	848.563	250.571	132.372
AT1G01640	TCV > Mock > NES	1.11022e-16	4.01658	1.62913	654.084	950.089	640.549	54.456	46.1076	38.1003	232.303	211.963	281.394
AT4G11543	TCV > Mock = NES	1.11022e-16	2.54639	1.62242	51.0696	75.8347	68.3252	10.2105	8.27572	14.9088	26.2984	20.4393	16.6506
AT5G17330	TCV > Mock > NES	1.11022e-16	7.19487	1.61305	2883.47	2247.53	2531.83	17.0175	7.09347	28.1611	1340.34	818.329	346.331
AT5G01880	TCV > Mock = NES	1.11022e-16	1.49617	1.609	422.307	437.575	414.115	166.102	130.118	155.383	163.593	107.191	146.845
AT5G64370	TCV > Mock > NES	1.11022e-16	2.17691	1.60828	5382.94	5608.56	4444.93	1212.78	980.081	1220.87	1433.27	1436.81	2192.88
AT1G02170	TCV > Mock = NES	1.11022e-16	1.94724	1.60674	1984.84	2688.64	1859.96	561.577	554.473	578.131	741.616	651.787	751.772
AT5G47390	TCV > Mock = NES	1.11022e-16	1.53363	1.60587	1683.33	1374.24	1561.99	591.074	605.31	399.225	379.574	525.366	612.74
AT1G17080	TCV > NES > Mock	1.11022e-16	1.14658	1.60432	2547.59	2641.32	2393.28	1060.76	1176.33	1187.74	807.362	738.086	948.249
AT5G65495	TCV > Mock > NES	1.11022e-16	2.54908	1.59686	494.001	426.825	446.961	89.6254	74.4815	69.5745	163.927	140.047	148.19
AT2G01008	TCV > Mock > NES	1.11022e-16	4.22575	1.59543	488.481	406.15	651.743	25.128	22.705	34.7872	201.06	190.767	119.884
AT3G30390	TCV > NES > Mock	1.11022e-16	1.09538	1.57913	16683.1	16322.1	14395.7	7420.76	6787.27	7976.22	5162.38	4900.89	5801.05
AT2G36670	TCV > Mock > NES	1.11022e-16	2.27884	1.57533	1856.19	1584.97	1664.48	358.502	352.309	341.246	593.468	525.366	594.425
AT5G18640	TCV > Mock = NES	1.11022e-16	1.88425	1.57474	1765.14	1658.11	1467.46	494.051	423.244	407.508	525.625	479.944	636.24
AT4G14710	TCV > Mock = NES	1.11022e-16	1.75997	1.57216	5565.31	5808.61	4552.81	1651.83	1601.98	1448.59	1645.89	1563.63	2146.7
AT4G37830	TCV > NES > Mock	1.11022e-16	1.17961	1.57098	2224.48	2069.84	1875.15	802.091	896.142	1025.4	712.688	599.553	764.26
AT4G27990	TCV > Mock = NES	1.11022e-16	1.62969	1.55058	3006.23	2827.05	2175.02	909.868	854.763	823.298	808.239	660.114	1265.44
AT4G40040	TCV > Mock = NES	1.11022e-16	1.37325	1.54879	18531.4	13358.4	15920.7	6915.91	6184.33	5355.58	5450.79	5354.34	5536.31
AT3G06860	TCV > Mock > NES	1.11022e-16	2.35872	1.54194	9464.58	9229.43	8215.16	1927.51	1352.49	1966.31	2830.59	2752.49	3658.13
AT4G19640	TCV > Mock = NES	1.11022e-16	1.29533	1.53593	5135.45	4025.37	3958.12	1887.81	1737.9	1719.48	1534.08	1305.84	1684.2
AT5G67160	TCV > Mock = NES	1.11022e-16	1.69237	1.53101	1457.45	1383.16	1088.46	399.344	364.132	452.234	405.873	370.936	582.769
AT5G04170	TCV > Mock = NES	1.11022e-16	1.55817	1.50811	2868.74	2627.92	2435.98	880.371	905.6	907.781	961.646	928.096	899.13
AT2G14170	TCV > Mock = NES	1.11022e-16	1.65739	1.50481	2609.46	2620.78	2253.78	870.161	710.529	791.824	896.777	822.114	918.278
AT1G19310	TCV > Mock > NES	1.11022e-16	2.83931	1.49776	698.279	556.302	559.887	90.7599	81.5749	81.1702	217.4	195.309	229.778
AT1G65000	TCV > Mock = NES	1.11022e-16	1.53878	1.48984	513.643	441.113	453.603	155.426	161.968	167.31	157.791	143.832	199.807
AT1G60870	TCV > Mock = NES	1.11022e-16	1.19132	1.48412	3533.63	2879.73	2710.23	1352.32	1393.87	1249.03	987.068	919.769	1354.52
AT5G66070	TCV > Mock = NES	1.11022e-16	1.51401	1.47294	924.164	667.026	728.802	305.18	305.019	202.097	284.023	294.477	257.251
AT4G22820	TCV > Mock = NES	1.11022e-16	1.6561	1.46989	3445.24	3753.03	2897.18	1202.57	1091.21	909.438	1353.49	1002.28	1288.75
AT4G23280	TCV > Mock > NES	1.11022e-16	5.75355	1.46513	205.371	255.381	181.338	4.538	2.36449	4.9696	142.093	52.9908	37.4637
AT1G36980	TCV > Mock = NES	1.11022e-16	1.4677	1.46231	3349.97	2762.76	2850.68	935.962	1291.01	1013.8	1178.17	1000.77	1073.96
AT5G25940	TCV > Mock = NES	1.11022e-16	1.46156	1.45769	1060.68	959.018	928.084	329.005	406.692	334.62	327.854	356.552	388.79
AT1G52800	TCV > Mock > NES	1.11022e-16	3.0256	1.44874	401.682	316.101	293.229	35.1695	26.0094	62.9483	134.122	110.524	125.712
AT1G04440	TCV > Mock = NES	1.11022e-16	1.18387	1.43944	5742.39	4516.49	4402.23	2279.21	2090.21	2083.92	1867.19	1775.19	1763.29
AT1G09080	TCV > Mock > NES	1.11022e-16	7.29515	1.43643	1119.6	1594.79	1466.15	3.4035	8.27572	14.9088	255.972	526.88	761.763
AT3G63310	TCV > Mock = NES	1.11022e-16	1.61183	1.43259	4774.03	3898.58	4307.34	1137.9	1359.58	1749.3	1534.08	1542.03	1732.49
AT3G23280	TCV > Mock = NES	1.11022e-16	1.66545	1.43145	3594.52	3095.82	2899.08	1067.56	824.025	1131.41	1281.61	1075.71	1198.01
AT1G06400	TCV > Mock > NES	1.11022e-16	1.6904	1.42928	4358.6	4470.79	4116.59	1411.32	1345.87	1254	1709.4	1424.26	1673.38
AT5G27320	TCV > Mock > NES	1.11022e-16	2.30531	1.42557	889.79	1071.53	889.177	217.824	166.697	192.158	336.62	331.571	392.953
AT4G30390	TCV > Mock = NES	1.11022e-16	1.14581	1.42284	859.345	627.737	669.967	322.198	334.575	318.055	287.53	250.571	266.409
AT4G09560	TCV > Mock = NES	1.11022e-16	1.35355	1.42151	353.559	376.821	378.636	174.713	130.047	129.21	145.518	137.776	130.707
AT3G53500	TCV > Mock = NES	1.11022e-16	1.53113	1.42145	3946.11	3236.91	3686.71	1072.1	1320.57	1368.3	1517.42	1354.29	1186.35
AT3G52070	TCV > Mock > NES	1.11022e-16	2.54432	1.42048	274.008	227.7	213.516	48.7835	39.0141	34.7872	111.33	73.4301	82.4202
AT5G47120	TCV > Mock > NES	1.11022e-16	1.98357	1.41884	9935.01	10795.6	10061.8	2760.24	2398.78	2627.26	3000.65	3453.49	5062.6
AT3G01930	TCV > Mock = NES	1.11022e-16	1.36921	1.41564	399.718	372.356	377.687	158.83	137.14	149.088	113.96	160.486	156.515
AT5G06370	TCV > Mock > NES	1.11022e-16	1.68594	1.41481	1996.63	2010.9	1961.5	647.799	582.847	624.514	762.655	684.338	791.734
AT1G27970	TCV > Mock = NES	1.11022e-16	1.65	1.41252	1672.53	2068.05	1859.02	580.864	547.38	655.988	652.201	565.487	885.809
AT1G15110	TCV > Mock = NES	1.11022e-16	1.1378	1.4002	991.93	786.68	849.32	391.402	393.688	409.164	326.977	315.674	352.992
AT4G11830	TCV > NES > Mock	1.11022e-16	1.00913	1.38456	6914.84	8343.69	6729.71	3516.26	3644.51	3763.98	2585.01	2653.26	3183.38
AT4G31130	TCV > NES > Mock	1.11022e-16	1.00433	1.38289	2083.05	1722.48	1933.03	971.131	963.53	926.003	619.767	695.693	884.977
AT3G12490	TCV > Mock > NES	1.11022e-16	1.95035	1.38172	3950.04	3077.07	3378.3	907.599	832.301	952.508	1525.31	1190.78	1277.1
AT1G34750	TCV > Mock = NES	1.11022e-16	1.48336	1.37391	5606.86	4413.8	4492.38	1826.54	1520.37	1843.72	1743.59	1945.52	1910.65
AT4G22840	TCV > Mock > NES	1.11022e-16	1.8777	1.3738	544.088	519.691	483.97	165.637	81.5749	173.936	179.706	162.757	254.753
AT4G36750	TCV > Mock = NES	1.11022e-16	1.19252	1.36992	875.059	886.69	892.973	399.344	354.674	407.508	326.977	308.861	391.288
AT1G65820	TCV > Mock > NES	1.11022e-16	2.07136	1.36368	6994.58	7234.6	5798.15	1728.98	1404.51	1631.69	2487.83	2364.9	2929.66
AT2G29070	TCV > Mock > NES	1.11022e-16	2.32735	1.35661	844.613	1167.97	883.483	215.555	164.332	197.128	316.458	314.917	499.517
AT3G16990	TCV > Mock > NES	1.11022e-16	2.02064	1.35285	1241.39	1274.23	1140.65	279.087	204.528	417.447	494.411	395.917	541.143
AT5G43190	TCV > Mock = NES	1.11022e-16	1.27166	1.3487	2171.44	1781.42	2089.61	922.348	854.763	725.562	780.187	778.965	813.379
AT5G25270	TCV > Mock = NES	1.11022e-16	1.4332	1.34767	3110.34	2927.06	2939.88	1055.08	1069.93	1199.33	1311.42	1112.05	1103.93
AT1G29290	TCV > Mock > NES	1.11022e-16	3.27897	1.34737	424.271	309.85	355.86	63.532	18.9159	29.8176	184.089	138.533	105.731
AT1G14400	TCV > Mock = NES	1.11022e-16	1.64744	1.34525	7669.29	6072.89	6284.02	2120.38	2135.14	2136.93	2534.29	2433.03	2914.68
AT1G65720	TCV > Mock > NES	1.11022e-16	1.79543	1.33848	7814.64	6675.62	6362.79	1969.49	1950.7	2087.23	2851.63	2448.93	2945.48
AT3G27110	TCV > Mock = NES	1.11022e-16	1.257	1.33475	3121.14	3198.51	2728.26	1436.28	1088.85	1260.62	1140.48	986.386	1460.25
AT5G51640	TCV > Mock > NES	1.11022e-16	1.80362	1.32532	1638.16	1576.51	1514.31	451.028	372.157	531.433	568.046	630.59	688.5
AT2G42490	TCV > NES > Mock	1.11022e-16	1.09474	1.3201	4555.02	4657.58	4377.56	1947.94	2129.22	2286.02	1641.9	1713.87	2087.15
AT2G30440	TCV > Mock = NES	1.11022e-16	1.37513	1.31716	10560.6	11981.5	9707.87	4239.62	3897.86	4295.39	4258.59	3831.23	4852.8
AT5G16050	TCV > Mock = NES	1.11022e-16	1.32547	1.31703	8271.32	8642.77	8571.02	3234.46	3542.01	3392.58	3277.66	3068.92	3882.08
AT3G18830	TCV > Mock > NES	1.11022e-16	1.97533	1.30914	6969.04	6398.81	5411.93	1801.58	1001.36	1972.93	2839.36	2597.31	2142.09
AT5G06280	TCV > Mock = NES	1.11022e-16	1.27922	1.30849	1223.71	1176.9	1028.67	440.186	449.253	523.465	545.254	408.029	431.249
AT4G11350	TCV > Mock > NES	1.11022e-16	2.36408	1.30484	1049.87	887.583	844.576	187.192	172.608	180.562	354.152	324.001	447.9
AT2G01600	TCV > Mock > NES	1.11022e-16	1.59649	1.30466	5641.23	5491.58	5576.1	1777.76	1700.07	2047.48	2258.16	2050.74	2455.12
AT1G33102	TCV > Mock > NES	1.11022e-16	3.20934	1.30125	135.531	141.978	107.233	18.152	11.8225	11.5957	41.2009	49.9627	64.9371
AT1G80190	TCV > Mock = NES	1.11022e-16	1.11394	1.29456	222.939	171.445	195.486	82.8184	105.22	84.4833	71.8824	79.4862	89.0804
AT1G08930	TCV > Mock = NES	1.11022e-16	1.09479	1.2895	7297.07	5963.95	7106.77	3280.97	3154.23	3101.03	3671.26	2581.41	2079.65
AT4G37470	TCV > Mock > NES	1.11022e-16	1.76534	1.28372	5543.02	5167.45	5693.77	1547.46	1227.17	2050.79	2268.68	1810.01	2659.09
AT3G14830	TCV > Mock = NES	1.11022e-16	1.22692	1.27516	2580	2035.01	2009.9	1001.76	842.941	985.638	900.283	863.75	973.225
AT5G64450	TCV > Mock > NES	1.11022e-16	3.44259	1.26834	117.853	102.688	87.3044	7.94149	7.09347	13.2523	49.967	46.1777	31.636
AT5G04760	TCV > Mock = NES	1.11022e-16	1.42483	1.267	1704.94	1626.94	1486.07	637.589	646.688	510.213	721.454	666.927	613.573
AT5G41850	TCV > Mock = NES	1.11022e-16	1.44453	1.26506	407.575	422.361	348.269	145.216	133.594	154.058	139.382	155.187	195.644
AT5G63680	TCV > Mock = NES	1.11022e-16	1.4482	1.26157	3131.94	2689.54	2652.35	1067.56	977.717	1060.18	1045.8	1175.64	1312.9
AT3G45260	TCV > Mock > NES	1.11022e-16	2.75127	1.26001	2524.02	1981.43	1963.4	255.262	256.547	448.921	817.005	893.273	990.708
AT1G56700	TCV > Mock = NES	1.11022e-16	1.47009	1.25302	3359.79	2822.58	2475.84	974.535	1064.02	1086.69	1167.65	1060.57	1404.47
AT3G62880	TCV > Mock > NES	1.11022e-16	2.2709	1.2519	605.961	800.075	680.405	141.812	151.327	139.149	318.211	299.776	258.084
AT4G37580	TCV > Mock = NES	1.11022e-16	1.34468	1.2518	149.28	138.406	118.62	43.111	63.8413	53.0091	52.5969	52.2338	65.7697
AT3G07720	TCV > Mock = NES	1.11022e-16	1.55504	1.24907	3983.43	3246.73	3075.58	1263.83	886.684	1356.7	1357.88	1302.06	1675.88
AT4G25880	TCV > Mock > NES	1.11022e-16	1.63109	1.24846	4339.94	5212.09	4713.49	1533.84	1423.42	1648.25	2106.51	1912.21	1985.58
AT3G03440	TCV > Mock > NES	1.11022e-16	1.8047	1.22537	1189.33	845.614	993.562	331.274	217.533	318.055	496.164	360.337	438.742
AT2G30140	TCV > Mock > NES	1.11022e-16	2.97052	1.20447	4537.34	3648.55	3413.41	501.449	476.445	501.93	2020.6	1546.57	1466.08
AT5G55490	TCV > Mock > NES	1.11022e-16	6.91534	1.20321	113.925	185.732	120.518	2.269	1.18225	0	76.2655	78.7292	27.4734
AT5G11350	TCV > Mock = NES	1.11022e-16	1.03201	1.20266	797.472	1052.78	804.719	458.338	396.052	443.951	380.451	354.281	418.761
AT3G52120	TCV > NES > Mock	1.11022e-16	1.02022	1.19739	2864.81	2709.18	2634.32	1338.71	1263.82	1444.5	1252.68	1121.13	1205.5
AT1G16210	TCV > Mock = NES	1.11022e-16	1.14291	1.1949	3005.25	2452.01	2596.36	1135.63	1308.75	1202.64	1308.79	1096.91	1112.26
AT5G43900	TCV > Mock = NES	1.11022e-16	1.15989	1.19393	8690.21	9056.74	8025.05	3952.6	3304.38	4277.17	3418.57	3681.91	4164.69
AT1G72340	TCV > Mock = NES	1.11022e-16	1.139	1.18008	617.746	518.798	533.316	231.438	268.37	258.419	242.822	221.047	273.069
AT1G65580	TCV > Mock > NES	1.11022e-16	1.74208	1.16683	3363.72	2942.24	3030.03	1018.78	773.188	998.891	1472.71	1345.97	1339.54
AT5G27150	TCV > Mock = NES	1.11022e-16	1.26105	1.16509	5010.72	4805.8	4323.47	2028.48	1734.35	2136.93	2065.3	1976.56	2263.64
AT4G17720	TCV > Mock = NES	1.11022e-16	1.15216	1.15838	2598.66	2379.69	2322.11	1186.69	1087.67	1010.49	1133.46	983.358	1153.88
AT2G35810	TCV > Mock > NES	1.11022e-16	1.64914	1.15716	1198.62	1358.58	1163.31	362.291	368.35	455.55	540.47	491.773	635.996
AT1G76510	TCV > Mock = NES	1.11022e-16	1.00534	1.15359	544.088	436.648	461.195	214.42	230.538	273.328	234.933	197.58	215.625
AT3G27560	TCV > Mock = NES	1.11022e-16	1.32321	1.15249	1313.08	1326.02	1195.69	546.829	487.085	498.617	597.851	534.45	592.76
AT5G19490	TCV > Mock > NES	1.11022e-16	1.99521	1.14313	459.627	388.429	405.206	106.643	101.673	106.018	204.251	206.664	156.515
AT5G04850	TCV > Mock = NES	1.11022e-16	1.19628	1.13915	1545.84	1358.16	1279.2	620.571	630.137	574.818	598.728	582.899	717.639
AT1G13960	TCV > Mock = NES	1.11022e-16	1.09956	1.13762	1402.45	1259.05	1314.31	681.834	605.31	568.191	638.176	559.431	609.41
AT1G73680	TCV > Mock > NES	1.11022e-16	1.66524	1.13591	2945.34	2469.87	2277.51	899.658	714.076	811.702	1246.55	1156.71	1097.27
AT1G05400	TCV > Mock > NES	1.11022e-16	3.41894	1.12803	143.388	164.301	142.344	12.4795	13.0047	16.5653	81.5252	80.2432	44.124
AT1G56145	TCV > Mock > NES	1.11022e-16	2.99811	1.12742	1626.37	1052.78	1406.36	180.385	145.416	185.532	678.5	615.45	576.109
AT1G48400	TCV > Mock > NES	1.11022e-16	3.98461	1.11895	55.9802	65.1846	52.2014	4.538	4.72898	1.65653	41.2026	21.9533	16.6506
AT2G20010	TCV > Mock = NES	1.11022e-16	1.10142	1.11727	2192.07	2085.02	1896.97	1086.85	702.254	1088.34	952.88	884.946	1008.19
AT2G46270	TCV > Mock > NES	1.11022e-16	1.55287	1.07786	2148.85	2480.59	2059.25	915.541	431.52	932.629	1086.13	872.834	1209.66
AT1G07430	TCV > Mock > NES	1.11022e-16	4.90078	1.07744	719.886	865.259	630.11	26.0935	8.27572	39.7568	568.923	246.029	234.773
AT5G04930	TCV > Mock > NES	1.11022e-16	1.51272	1.0724	10697.1	8692.77	9014.18	3367.19	2364.49	4222.51	4504.05	3865.3	5137.53
AT5G59540	TCV > Mock > NES	1.11022e-16	1.74369	1.07111	3783.08	4453.09	3241.65	1411.32	846.488	1169.51	1805.83	1638.17	2018.88
AT4G12120	TCV > Mock > NES	1.11022e-16	1.53445	1.06525	898.629	781.323	836.984	311.987	238.814	318.055	490.904	391.375	320.523
AT5G45500	TCV > Mock > NES	1.11022e-16	2.21074	1.0629	5792.48	7526.59	5672.89	1220.72	1326.48	1555.49	3071.66	2795.64	3223.55
AT5G44980	TCV > Mock > NES	1.11022e-16	1.84442	1.05926	380.076	325.03	324.545	105.508	93.3974	87.7963	198.992	161.897	133.204
AT4G38580	TCV > Mock > NES	1.11022e-16	1.75252	1.05708	240.617	228.593	265.709	61.263	83.9394	72.8875	108.7	127.935	116.554
AT3G14700	TCV > Mock > NES	1.11022e-16	4.58973	1.05562	463.555	347.354	310.31	23.8245	9.45796	13.2523	242.822	181.683	114.889
AT2G36305	TCV > Mock = NES	1.11022e-16	1.0314	1.05052	205.261	197.34	203.078	102.105	106.402	87.7963	92.0446	94.6264	105.731
AT4G01710	TCV > Mock > NES	1.11022e-16	1.83795	1.04809	574.533	517.012	499.154	156.561	127.683	160.684	295.419	249.057	224.782
AT4G00525	TCV > Mock = NES	1.11022e-16	1.10024	1.0458	146.334	129.476	143.293	64.6665	74.4815	56.3222	67.4993	60.5609	74.9275
AT1G21680	TCV > Mock > NES	1.11022e-16	2.43835	1.04367	6730.39	6032.7	6024.01	1191.22	870.133	1404.74	3761.55	2574.6	2777.31
AT5G05850	TCV > Mock = NES	1.11022e-16	1.3161	1.04303	453.734	467.008	386.227	212.151	137.14	175.593	220.907	204.393	208.964
AT4G05530	TCV > Mock > NES	1.11022e-16	2.05613	1.03772	4254.49	4468.27	3944.83	1063.03	974.17	1008.83	1810.21	1759.29	2600.82
AT5G27920	TCV > Mock > NES	1.11022e-16	3.1989	1.03654	654.084	817.933	604.488	95.2979	66.2057	64.6049	344.51	349.739	318.026
AT1G65270	TCV > Mock = NES	1.11022e-16	1.16972	1.03156	2196.98	2516.31	2089.61	938.231	982.446	1103.25	1024.76	1006.83	1296.25
AT5G24520	TCV > Mock = NES	1.11022e-16	1.32362	1.02533	3043.55	2357.36	2671.33	1094.79	1114.86	1015.46	1126.45	1230.14	1609.28
AT3G46930	TCV > Mock > NES	1.11022e-16	2.5928	1.02172	1512.45	1150.11	1147.29	268.876	173.79	188.845	751.259	604.852	520.33
AT2G13790	TCV > Mock = NES	1.11022e-16	1.02985	1.02088	7923.76	6619.1	6327.29	3654.38	2837.92	3729.08	3728.21	3010.05	3546.86
AT1G29150	TCV > Mock > NES	1.11022e-16	1.28696	1.01515	5040.18	5185.3	5447.99	1899.15	2204.89	2319.15	2498.35	2412.6	2843.91
AT5G63030	TCV > Mock > NES	1.11022e-16	1.82114	1.01324	3845.94	4049.48	3100.26	957.517	1125.5	1028.71	1777.77	1551.87	2117.95
AT1G34220	TCV > Mock = NES	1.11022e-16	1.13882	1.0109	2134.12	1961.79	1947.27	948.441	833.483	962.447	994.958	918.255	1085.62
AT1G35580	TCV > Mock = NES	1.11022e-16	1.10325	1.00938	4168.07	3656.59	4101.41	2061.38	2053.56	1436.22	1810.21	1971.26	2142.93
AT3G63030	TCV > Mock > NES	1.11022e-16	1.36208	1.00916	643.281	678.635	632.957	268.876	195.07	296.52	285.776	289.178	396.283
AT3G54680	TCV > Mock = NES	1.11022e-16	1.07515	1.00175	1379.86	1325.12	1195.69	677.296	537.922	636.109	545.254	568.516	834.193
AT1G04070	TCV > Mock > NES	1.11022e-16	2.10091	1.00143	420.342	454.507	510.541	110.046	121.771	91.1094	227.92	246.786	217.29
AT3G52080	TCV > Mock = NES	2.22045e-16	10.5472	5.83389	12.7674	17.8588	14.2344	0	0	0	0	0.757011	0
AT4G39675	TCV > Mock = NES	2.22045e-16	7.82166	5.37776	107.05	73.2211	93.9472	0	1.18225	0	2.62984	2.27103	1.66506
AT5G51465	TCV > Mock > NES	2.22045e-16	9.71079	4.5739	6913.06	3119.93	3421.95	12.4795	3.54674	0	229.673	136.262	198.974
AT2G29060	TCV > Mock = NES	2.22045e-16	11.6082	4.45146	25.5348	33.9317	34.1626	0	0	0	1.75323	0	2.49758
AT4G37530	TCV > Mock > NES	2.22045e-16	5.12569	3.76009	2717.39	2167.25	1780.25	39.7075	65.0235	86.1398	157.791	130.963	203.137
AT4G39720	TCV > Mock = NES	2.22045e-16	2.60285	2.82702	48.1233	33.0388	40.8053	6.80699	8.27572	4.9696	2.62984	4.54207	9.99033
AT3G25600	TCV > Mock = NES	2.22045e-16	2.06281	2.52115	2497.5	1538.54	2033.62	442.455	516.641	493.647	427.788	348.982	280.562
AT2G39420	TCV > Mock = NES	2.22045e-16	2.14534	2.33312	4532.43	5379.07	3666.79	1463.5	762.548	843.176	738.986	900.843	1054.81
AT4G38560	TCV > Mock > NES	2.22045e-16	3.65883	2.14629	3665.23	4304.87	2424.6	324.467	148.963	349.529	892.394	838.769	616.903
AT1G47960	TCV > Mock = NES	2.22045e-16	2.22797	2.11423	1024.34	892.94	1188.1	216.689	192.706	253.45	206.004	199.851	311.365
AT1G24530	TCV > Mock > NES	2.22045e-16	2.94609	2.04755	822.025	917.05	602.59	114.584	89.8506	99.3921	205.128	200.608	160.678
AT1G79520	TCV > Mock = NES	2.22045e-16	2.35146	1.98586	5715.87	6897.96	5009.57	1151.52	1026.19	1275.53	1553.36	1165.04	1730.82
AT1G52200	TCV > Mock > NES	2.22045e-16	4.57739	1.96827	1548.79	874.189	1173.87	68.0699	37.8319	44.7264	457.593	313.403	148.19
AT1G73500	TCV > NES > Mock	2.22045e-16	1.5669	1.95891	3294.97	3155.65	3241.65	1250.22	1118.4	902.811	851.193	833.469	808.384
AT1G76980	TCV > Mock > NES	2.22045e-16	2.48028	1.74924	1717.71	1110.82	1267.81	249.59	196.253	288.237	352.399	398.188	467.88
AT1G15780	TCV > Mock > NES	2.22045e-16	1.7945	1.56167	4169.05	4172.71	3844.24	1203.7	912.693	1396.46	1457.81	1306.6	1363.68
AT4G17245	TCV > Mock > NES	2.22045e-16	2.15373	1.49469	321.149	424.147	321.698	68.0699	133.594	38.1003	144.641	133.234	100.736
AT2G41220	TCV > Mock > NES	2.22045e-16	1.71967	1.42279	5470.34	6011.27	5615	1810.66	1269.73	2110.43	1854.92	1922.81	2599.15
AT1G68740	TCV > Mock > NES	2.22045e-16	2.52002	1.30111	359.452	252.702	281.841	35.1695	29.5561	91.1094	88.5381	155.187	119.051
AT5G11970	TCV > Mock = NES	2.22045e-16	1.19197	1.27206	3231.93	2538.58	2565.99	1176.46	1145.6	1326.85	1114.18	1118.86	1218.81
AT1G69870	TCV > Mock = NES	2.22045e-16	1.83087	1.27095	6543.79	5881.8	4618.59	2182.78	943.432	1664.82	2309.88	2377.77	2375.2
AT1G60490	TCV > Mock = NES	2.22045e-16	1.38537	1.26578	3766.39	3594.98	3354.58	1456.7	1127.86	1517.39	1382.42	1281.62	1792.43
AT5G01990	TCV > Mock > NES	2.22045e-16	2.0211	1.19071	896.665	616.129	788.587	207.613	132.411	226.945	352.399	286.15	369.642
AT3G18535	TCV > Mock = NES	2.22045e-16	1.05475	1.12727	507.799	387.443	489.471	244.634	248.272	173.653	232.303	213.427	188.151
AT3G05780	TCV > Mock = NES	3.33067e-16	12.9944	7.19739	117.853	45.54	81.3867	0	0	0	0.880998	0.757011	0
AT4G16260	TCV > Mock > NES	3.33067e-16	16.8331	6.1525	1827.7	1075.1	599.744	0	0	0	22.792	10.5982	15.818
AT3G15510	TCV > Mock = NES	3.33067e-16	5.54786	4.39894	1661.73	2243.07	990.716	48.7835	17.7337	38.1003	85.0316	53.7478	93.2431
AT2G44400	TCV > Mock > NES	3.33067e-16	5.72228	2.86463	103.121	54.4694	78.7638	1.1345	0	3.31307	9.64276	5.29908	17.4831
AT5G06820	TCV > Mock = NES	3.33067e-16	3.37952	2.84164	271.062	481.295	338.779	27.228	37.8319	39.7568	44.7074	49.2057	58.2769
AT5G13080	TCV > Mock > NES	3.33067e-16	17.278	2.22346	2302.06	917.943	1547.76	0	0	0	721.454	111.281	188.151
AT2G48110	TCV > Mock = NES	3.33067e-16	1.51413	1.46223	1669.58	2351.11	1807.77	728.348	556.838	755.38	662.721	610.908	841.685
AT1G57630	TCV > Mock > NES	3.33067e-16	5.80231	1.2565	1845.38	994.736	1177.66	48.7835	8.27572	14.9088	821.388	506.441	353.824
AT4G17660	TCV > Mock > NES	3.33067e-16	5.32454	1.02392	362.398	181.267	234.393	11.345	4.72898	3.31307	127.986	134.748	119.884
AT5G08240	TCV > Mock > NES	4.44089e-16	6.23324	3.33145	2950.25	1406.38	1988.07	53.3215	17.7337	13.2523	325.224	171.842	133.204
AT5G51390	TCV > Mock = NES	4.44089e-16	1.98443	2.40129	373.201	230.379	262.862	69.2044	76.846	72.8875	59.6098	46.9347	57.4444
AT4G17085	TCV > Mock = NES	4.44089e-16	1.55387	1.9873	192.493	301.814	240.087	76.0114	86.3039	87.7963	78.0187	52.2338	54.9468
AT5G61210	TCV > Mock = NES	4.44089e-16	1.29109	1.61729	9446.9	6691.69	7028.01	3598.63	2785.37	3082.81	2869.16	2364.15	2317.76
AT1G19394	TCV > Mock = NES	4.44089e-16	2.70428	1.58644	35.3559	44.647	47.4481	7.94149	8.27572	3.31307	15.7791	10.5982	16.0428
AT2G27480	TCV > Mock = NES	4.44089e-16	1.16613	1.5681	207.225	144.656	194.537	87.3564	81.5749	74.5441	57.8566	51.4768	74.9275
AT5G52900	TCV > Mock = NES	4.44089e-16	1.60723	1.26843	606.943	600.056	435.573	161.099	172.608	205.41	274.38	188.496	218.955
AT1G49500	TCV > NES > Mock	5.55112e-16	2.44127	3.27018	627.567	429.504	456.45	26.0935	221.08	31.4742	49.967	88.5703	18.3156
AT1G71100	TCV > Mock = NES	5.55112e-16	2.14284	2.29107	1605.75	1048.31	1063.79	256.397	328.664	256.763	275.257	260.412	223.95
AT2G32340	TCV > Mock > NES	5.55112e-16	2.35016	1.55098	761.134	1166.18	855.963	203.075	157.239	185.532	316.458	302.048	331.346
AT5G07010	TCV > Mock > NES	6.66134e-16	10.7019	2.99226	1411.29	1767.13	650.987	2.269	0	0	298.049	83.2712	99.9033
AT4G35480	TCV > Mock = NES	6.66134e-16	1.96636	2.45566	357.488	235.736	257.169	112.315	39.0141	66.2614	61.363	54.5048	39.1288
AT3G19380	TCV > Mock = NES	6.66134e-16	1.68776	1.86075	2419.92	1619.79	1718.57	588.805	600.581	598.009	610.124	496.599	478.703
AT4G02520	TCV > Mock > NES	7.77156e-16	3.56237	1.93543	42656.8	29698.4	25497.5	3228.78	1713.07	3341.23	8895.89	7654.9	9032.09
AT2G18780	TCV > Mock > NES	7.77156e-16	2.74513	1.75466	381.058	235.736	351.116	54.456	48.4721	41.4134	87.6615	115.066	84.0853
AT3G21890	TCV > Mock = NES	7.77156e-16	1.45603	1.64348	2640.89	2928.84	2014.64	1050.55	736.539	977.356	943.237	567.758	916.613
AT2G38490	TCV > Mock = NES	8.88178e-16	2.46507	3.4293	55.9802	41.9682	32.2647	7.94149	2.36449	13.2523	3.50646	6.05609	2.49758
AT3G05630	TCV > Mock > NES	8.88178e-16	3.76113	2.66348	1138.26	667.919	741.139	88.4909	41.3786	57.9787	149.901	151.402	100.736
AT4G01600	TCV > Mock = NES	8.88178e-16	1.8841	2.35402	324.096	210.734	225.853	88.4909	57.93	59.6353	36.8178	46.1777	65.7697
AT2G22790	TCV > Mock = NES	8.88178e-16	1.89505	2.29681	142.406	106.26	86.3555	29.497	30.7384	29.8176	26.2984	22.7103	19.1481
AT2G39270	TCV > Mock = NES	8.88178e-16	1.35011	1.13746	1830.65	2322.54	1780.25	773.728	693.978	859.742	798.596	797.89	1100.6
AT1G30814	TCV > Mock = NES	9.99201e-16	13.9704	9.12489	84.4613	250.916	146.14	0	0	0	0	0	0.832528
AT1G80820	TCV > Mock = NES	9.99201e-16	3.20002	2.6286	256.33	277.704	154.681	29.497	18.9159	26.5046	48.2138	26.4954	36.6312
AT1G53887	TCV > NES > Mock	9.99201e-16	1.23599	2.50749	97.2562	60.7405	88.2534	40.842	35.4674	28.2191	8.76615	12.8692	21.6457
AT1G77000	TCV > Mock > NES	9.99201e-16	3.86777	1.94464	759.17	433.076	534.265	56.725	20.0982	41.4134	158.667	124.15	165.673
AT5G25450	TCV > Mock > NES	9.99201e-16	2.66197	1.74557	515.607	316.101	418.492	61.263	73.2992	62.9483	143.765	99.1685	129.874
AT1G03200	TCV > Mock > NES	9.99201e-16	2.9798	1.49081	811.388	509.78	569.677	102.112	44.9253	92.6251	211.24	208.941	252.586
AT3G17690	TCV > Mock > NES	9.99201e-16	2.94079	1.38689	746.402	1186.72	836.035	80.5494	144.234	135.836	363.795	317.945	377.135
AT3G13782	TCV > Mock = NES	9.99201e-16	1.30849	1.35795	106.068	154.479	141.395	61.263	57.93	43.0699	53.4735	49.2057	54.1143
AT1G01725	TCV > Mock = NES	1.11022e-15	2.18838	2.00985	1038.09	660.776	744.935	186.058	184.43	165.653	181.459	176.384	248.926
AT1G65800	TCV > Mock = NES	1.11022e-15	1.17974	1.60021	8088.29	7850.89	6275.43	2967.19	2021.33	4817.68	2456.57	2186.5	2683.94
AT5G54500	TCV > Mock = NES	1.11022e-15	1.04414	1.05915	2367.86	1807.31	1914.05	1072.1	981.264	899.498	869.602	929.61	1123.08
AT3G16900	TCV > Mock = NES	1.22125e-15	2.83086	2.23968	68.7476	109.832	78.7638	6.80699	9.45796	19.8784	11.396	18.9253	24.1433
AT3G25510	TCV > Mock > NES	1.22125e-15	5.31031	2.07818	2995.43	5424.61	3262.53	114.584	47.2898	132.523	821.388	1039.38	905.79
AT2G44980	TCV > Mock > NES	1.22125e-15	1.78339	1.20211	522.482	615.236	440.318	129.333	133.594	195.471	263.861	251.328	170.668
AT3G13290	TCV > Mock = NES	1.22125e-15	1.21489	1.19324	1914.13	2620.78	2101.95	921.213	768.46	1169.51	937.978	929.61	1034.83
AT5G18350	TCV > Mock > NES	1.33227e-15	11.425	7.29548	571.587	1726.95	903.411	1.1345	0	0	14.9025	3.78506	1.66506
AT4G14730	TCV > Mock = NES	1.33227e-15	5.55493	5.20592	25.5348	13.3941	18.0303	0	1.18225	0	0	1.51402	0
AT3G09830	TCV > Mock = NES	1.33227e-15	1.11724	1.2242	3465.86	2840.44	2715.93	1734.65	959.983	1464.38	1411.35	1215	1235.47
AT1G03210	TCV > Mock > NES	1.33227e-15	1.64092	1.14659	584.355	742.926	619.672	211.017	196.253	217.006	229.673	255.113	394.618
AT2G03310	TCV > Mock = NES	1.44329e-15	2.97498	2.4437	608.907	383.071	392.87	64.6665	23.6449	87.7963	99.0575	60.5609	94.9081
AT2G03530	TCV > Mock = NES	1.44329e-15	1.69777	1.52161	2144.93	1417.99	1734.7	577.46	416.15	639.422	610.124	588.955	646.041
AT1G17147	TCV > Mock > NES	1.44329e-15	2.97076	1.25634	155.173	132.136	104.386	27.228	9.45796	13.2523	69.2526	60.5609	34.1336
AT2G25470	TCV > Mock = NES	1.55431e-15	3.15552	2.5052	252.402	151.8	185.047	41.9765	14.1869	9.93921	25.4218	49.2057	29.1385
AT1G65481	TCV > Mock > NES	1.55431e-15	13.3692	1.74423	144.37	100.902	72.1211	0	0	0	41.2009	39.3646	14.153
AT3G05937	TCV > Mock > NES	1.55431e-15	3.20909	1.41746	524.446	424.147	339.728	45.38	50.8366	43.0699	199.868	198.337	84.0853
AT3G28890	TCV > Mock > NES	1.66533e-15	7.6088	3.35609	3091.68	1643.9	1502.21	17.0175	0	14.9088	165.68	186.225	257.251
AT1G09480	TCV > Mock > NES	1.77636e-15	5.05627	3.33996	355.523	189.303	219.21	11.345	8.27572	3.31307	32.4347	19.6823	23.3108
AT5G16980	TCV > Mock > NES	1.77636e-15	4.43361	1.05087	379.285	449.467	254.624	16.7441	11.826	21.535	248.112	165.786	109.006
AT1G80440	TCV > Mock > NES	1.88738e-15	7.42944	3.66782	2845.17	1162.61	2200.64	10.2105	22.4627	3.31307	271.751	130.963	85.7503
AT4G22680	TCV > NES > Mock	1.9984e-15	1.23678	2.9615	54.9981	74.114	42.7033	21.5555	24.8272	26.5046	6.1363	7.57011	8.32528
AT3G10190	TCV > Mock > NES	1.9984e-15	2.50913	1.48846	1231.56	780.43	911.003	164.502	150.145	198.784	333.99	333.085	374.637
AT4G28040	TCV > Mock > NES	2.10942e-15	7.44245	3.04093	125.71	66.0776	101.539	0	0	1.65653	32.4347	1.51402	1.66506
AT2G30360	TCV > NES > Mock	2.10942e-15	1.54451	2.50333	2044.75	1326.02	1358.91	665.951	479.992	475.425	292.789	264.954	276.399
AT5G49740	TCV > Mock = NES	2.10942e-15	1.36996	1.48478	7605.28	7446.54	5469.97	2993.19	2415.52	2531.2	2043.99	2117.6	3170.89
AT5G65500	TCV > Mock = NES	2.22045e-15	3.99562	2.51311	21.6064	23.2164	26.5709	1.1345	0	3.31307	4.38307	2.27103	5.82769
AT4G26130	TCV > Mock = NES	2.22045e-15	1.43612	2.0942	3497.29	2320.75	2446.42	923.482	928.063	1202.64	616.26	587.441	731.792
AT1G09420	TCV > Mock > NES	2.33147e-15	4.22244	1.62259	1880.74	1146.54	1130.21	97.5669	80.3927	44.7264	473.372	491.3	385.46
AT2G03440	TCV > Mock = NES	2.44249e-15	1.79479	2.38906	3452.11	2110.02	2544.17	749.904	922.151	664.27	488.274	531.422	527.822
AT4G21950	TCV > Mock = NES	2.55351e-15	11.16	2.48003	18.6601	20.5376	29.4178	0	0	0	1.75323	3.02805	7.49275
AT2G20142	TCV > Mock > NES	2.77556e-15	4.97881	1.57442	2483.75	1208.15	1870.4	74.8769	40.1963	61.2918	635.546	667.684	564.454
AT1G15380	TCV > Mock = NES	2.88658e-15	11.7025	9.0916	2215.64	697.386	967.94	1.1345	0	0	0.876615	4.54207	1.66506
AT1G62422	TCV > Mock = NES	2.88658e-15	2.1874	1.91241	1699.05	1257.26	1064.73	323.332	261.276	298.176	440.061	313.403	314.695
AT5G46520	TCV > Mock > NES	2.88658e-15	2.53706	1.18779	2609.35	3296.89	2173.98	578.743	248.324	565.08	1395.12	1239.22	912.65
AT1G18570	TCV > Mock > NES	2.88658e-15	3.03898	1.15685	2603.57	1589.43	2097.2	271.145	250.636	243.511	1130.83	982.601	707.648
AT1G13520	TCV > Mock > NES	2.9976e-15	17.9746	1.65194	3524.79	1966.25	2235.75	0	0	0	2134.56	138.533	185.654
AT3G18690	TCV > NES > Mock	3.10862e-15	1.0574	1.64601	528.374	401.823	389.074	207.613	192.706	233.571	197.238	113.552	110.726
AT2G15480	TCV > Mock > NES	3.21965e-15	3.70528	1.38049	990.083	742.145	737.698	91.6505	40.1963	57.4834	528.685	243.569	176.393
AT1G61440	TCV > Mock = NES	3.44169e-15	4.01227	3.25208	177.424	114.295	97.743	10.3875	7.09347	6.62614	23.6686	11.3552	5.82769
AT3G22160	TCV > Mock > NES	3.44169e-15	3.91859	2.39185	2597.68	1501.93	1731.85	199.672	98.1264	87.7963	462.853	353.524	294.715
AT4G29860	TCV > Mock = NES	3.44169e-15	2.00896	1.67261	772.26	1027.6	660.496	185.51	184.822	240.928	274.423	251.046	246.287
AT1G71770	TCV > Mock > NES	3.55271e-15	7.30631	3.24101	320.167	708.102	450.757	3.4035	5.91123	0	57.8566	46.9347	51.6167
AT4G23885	TCV > Mock = NES	3.55271e-15	1.27917	1.16079	713.993	589.341	640.549	267.742	264.823	268.359	214.771	255.87	398.781
AT3G27330	TCV > Mock = NES	3.66374e-15	1.52773	1.79697	396.772	262.524	303.668	129.333	88.6684	115.957	111.33	90.8414	74.9275
AT1G74410	TCV > Mock = NES	3.66374e-15	1.68594	1.33077	834.792	1058.13	738.292	333.543	234.085	250.137	314.705	321.73	409.604
AT1G60470	TCV > Mock > NES	3.77476e-15	8.90524	5.26668	100.175	274.133	206.874	0	1.18225	0	6.1363	2.27103	6.66022
AT4G15540	TCV > Mock = NES	3.88578e-15	1.35506	1.06655	3141.77	2655.6	2505.26	1144.71	894.96	1205.96	1083.5	1183.97	1696.69
AT1G03050	TCV > Mock > NES	3.9968e-15	6.39221	2.03356	24.5527	42.8611	30.3668	1.1345	0	0	7.88953	6.8131	9.1578
AT2G25200	TCV > Mock = NES	4.21885e-15	2.10922	2.02213	275.972	174.123	250.526	47.649	73.2992	41.4134	53.4735	75.7011	43.2914
AT4G39270	TCV > Mock > NES	4.21885e-15	3.702	1.99888	845.595	473.258	658.579	60.1285	35.4674	56.3222	213.894	164.271	116.554
AT3G58450	TCV > Mock = NES	4.44089e-15	10.3679	10.3679	17.678	13.3941	8.54065	0	0	0	0	0	0
AT5G38710	TCV > Mock > NES	4.44089e-15	5.1252	2.97193	501.857	316.994	266.658	14.7485	4.72898	11.5957	80.6486	39.3646	18.3156
AT4G05070	TCV > NES > Mock	4.44089e-15	1.8757	2.82329	2002.52	1206.36	1799.23	340.35	721.17	303.146	191.102	280.851	235.605
AT1G04580	TCV > Mock = NES	4.996e-15	7.45221	9.64944	374.183	141.978	176.507	2.269	0	1.65653	0	0	0.832528
AT5G01850	TCV > Mock = NES	5.21805e-15	1.47248	1.53889	1219.78	1559.07	1111.23	572.922	378.319	450.577	366.425	401.216	571.114
AT5G67080	TCV > Mock > NES	6.43929e-15	6.44945	1.92712	110.978	111.618	81.6107	2.269	1.18225	0	59.6098	4.54207	15.818
AT2G32800	TCV > Mock = NES	6.77236e-15	1.37441	1.6949	4027.63	2747.58	2876.3	1259.29	1292.19	1171.17	1023.01	959.89	998.201
AT3G19615	TCV > Mock > NES	7.54952e-15	6.0695	2.69567	68.7476	41.9682	43.6522	2.269	0	0	15.7791	3.02805	4.99517
AT5G41540	TCV > Mock = NES	7.88258e-15	14.0563	8.23606	75.6224	258.953	176.47	0	0	0	0	0	1.66506
AT2G43320	TCV > Mock = NES	7.88258e-15	1.20903	1.19825	1769.76	1270.65	1361.76	685.237	599.398	619.544	700.415	600.31	617.735
AT5G05530	TCV > Mock = NES	8.32667e-15	7.81734	6.85014	67.7655	190.196	122.416	0	0	1.65653	1.75323	1.51402	0
AT5G07730	TCV > Mock = NES	9.32587e-15	1.73692	1.38848	299.543	435.755	333.085	139.543	89.8506	91.1094	125.356	137.019	145.692
AT3G28050	TCV > Mock = NES	9.4369e-15	1.71173	1.42024	5846.49	4747.76	3940.09	1493	1299.29	1644.94	1787.42	1450.43	2192.88
AT5G53320	TCV > Mock = NES	1.04361e-14	2.32152	2.80251	25.5348	31.2529	22.7751	4.538	4.72898	6.62614	3.50646	4.54207	3.33011
AT1G67856	TCV > Mock > NES	1.06581e-14	1.91076	1.10844	1728.46	1882.26	1279.2	546.829	317.968	435.669	844.165	732.771	690.965
AT5G44260	TCV > Mock = NES	1.07692e-14	2.58719	2.07735	36.338	42.8611	55.9887	5.6725	3.54674	13.2523	14.9025	12.1122	4.99517
AT3G50480	TCV > Mock > NES	1.13243e-14	2.67339	1.70466	39097.7	26330.1	26421.9	5842.67	3696.88	4858.62	8947.61	8271.11	10960.2
AT5G10270	TCV > Mock = NES	1.19904e-14	1.00107	1.0138	985.055	731.318	777.199	429.975	390.141	425.729	440.061	377.749	417.096
AT1G10865	TCV > Mock = NES	1.32117e-14	1.65085	1.19069	1531.11	1076.89	1154.89	462.876	400.781	334.62	578.566	516.282	553.631
AT4G23140	TCV > Mock > NES	1.35447e-14	4.86403	2.01074	11295.7	6124.95	7248.96	426.903	91.8274	328.358	1671.13	1815.4	2635.1
AT1G26410	TCV = NES > Mock	1.35447e-14	16.0783	1.14345	940.86	532.192	602.59	0	0	0	659.214	110.524	169.836
AT2G47190	TCV > Mock > NES	1.36557e-14	8.8418	4.49154	1589.05	658.99	847.422	3.4035	0	3.31307	65.7461	31.0375	40.7938
AT2G21430	TCV > Mock = NES	1.39888e-14	2.5639	2.66138	198.039	333.067	221.108	40.842	36.6496	49.696	42.9541	48.4487	27.4734
AT2G24850	TCV > Mock > NES	1.54321e-14	7.75101	2.15873	9804.39	11495.7	4793.2	83.9529	10.6402	26.5046	776.681	1567.01	3499.95
AT3G24130	TCV > Mock = NES	1.55431e-14	5.28719	4.83054	15.7137	10.7153	20.8771	0	1.18225	0	0.876615	0.757011	0
AT3G09390	TCV > Mock > NES	1.59872e-14	3.04245	1.01308	34239.2	49666.2	31230.3	4700.23	3696.88	5577.55	18402.8	16930.6	21714.8
AT1G11100	TCV > Mock > NES	1.60982e-14	2.27009	1.19519	151.245	107.153	160.374	28.3625	23.6449	34.7872	75.3889	57.5329	49.9517
AT5G03230	TCV > Mock = NES	1.65423e-14	2.40627	2.5153	1386.74	1890.35	1097	356.233	177.337	291.55	231.426	242.244	291.385
AT1G08860	TCV > Mock > NES	1.67644e-14	7.24869	1.79915	159.102	79.4717	111.028	2.269	0	0	35.9412	46.1777	18.3156
AT2G05540	TCV > Mock = NES	1.70974e-14	4.47018	5.66637	2123.32	1085.82	1041.01	29.497	132.411	29.8176	45.584	18.9253	19.1481
AT5G54610	TCV > Mock > NES	1.75415e-14	2.28802	1.4354	5466.42	7768.58	6048.68	1390.9	450.435	2107.11	2138.94	1944.01	3047.05
AT1G14330	TCV > Mock = NES	1.80966e-14	1.21598	1.25297	1724.58	1213.51	1486.07	637.589	682.156	584.757	564.54	554.132	737.619
AT5G64260	TCV > Mock = NES	1.89848e-14	4.13391	4.56142	8536.49	3868.22	5888.3	406.151	380.683	255.106	257.725	317.188	199.807
AT1G73040	TCV > Mock > NES	1.95399e-14	4.14764	2.71905	785.687	419.682	532.367	37.4385	5.91123	54.6656	91.1679	54.5048	118.219
AT3G47110	TCV > Mock = NES	2.08722e-14	3.55721	2.80526	426.235	784.895	539.959	68.0699	42.5608	38.1003	95.551	74.1871	80.7552
AT2G04690	TCV > Mock = NES	2.12053e-14	1.23212	1.32499	2255.9	2549.34	1873.25	973.4	802.745	1066.81	731.973	761.553	1172.2
AT1G17460	TCV > Mock > NES	2.13163e-14	3.63569	1.02406	439.985	727.746	446.961	38.573	44.9253	46.383	227.043	275.552	291.385
AT1G36622	TCV > Mock > NES	2.60902e-14	5.96594	3.72519	3163.37	1728.73	1626.52	62.3975	31.9206	9.93921	275.257	121.879	95.7407
AT1G66480	TCV > Mock = NES	2.63123e-14	1.41262	1.76788	145.352	94.6517	110.08	39.7075	52.0188	39.7568	35.9412	31.0375	35.7987
AT3G18560	TCV > Mock = NES	2.70894e-14	1.90993	2.06662	877.023	535.764	818.005	203.075	211.622	178.906	227.92	159.729	144.86
AT3G25882	TCV > Mock = NES	2.9643e-14	1.47889	1.49844	1549.77	1178.68	1119.77	357.367	335.758	687.462	511.066	424.683	426.254
AT2G32050	TCV > Mock = NES	3.03091e-14	4.72272	4.19298	54.016	121.44	98.692	6.80699	3.54674	0	7.01292	3.78506	4.16264
AT5G38260	TCV > Mock > NES	3.15303e-14	6.20154	1.60277	24.5527	24.1094	37.0095	1.1345	0	0	9.64276	6.05609	12.4879
AT1G78420	TCV > Mock = NES	3.20854e-14	1.46028	1.0756	2527.95	3177.08	2247.14	1067.56	858.31	964.103	1351.74	1273.29	1148.06
AT5G40730	TCV > Mock = NES	3.26406e-14	2.70007	2.99612	100.175	83.0435	144.242	11.345	30.7384	8.28267	14.9025	13.6262	12.4879
AT4G25440	TCV > Mock = NES	3.39728e-14	1.23496	1.06388	698.279	940.266	708.874	367.578	288.468	341.246	371.685	356.552	394.618
AT5G57950	TCV > Mock > NES	3.41949e-14	1.92603	1.18962	566.677	854.544	648.141	166.771	193.888	183.875	314.705	294.477	298.045
AT4G32040	TCV > Mock = NES	3.59712e-14	1.74	1.41345	2213.67	3227.98	2326.85	777.132	698.707	849.802	1029.15	885.703	1001.53
AT2G42000	TCV > Mock = NES	3.80806e-14	11.2066	11.2066	12.7674	26.7882	31.3157	0	0	0	0	0	0
AT2G07675	TCV > Mock > NES	3.94129e-14	2.87715	2.13842	138.627	91.2201	121.068	0	5.96916	41.7679	37.5708	31.6802	10.4282
AT1G62420	TCV > Mock = NES	4.16334e-14	5.78487	4.13645	124.728	105.367	53.1418	2.269	1.18225	1.65653	9.64276	2.27103	4.16264
AT1G57943	TCV > Mock = NES	4.27436e-14	4.84666	4.3316	139.459	334.853	272.352	2.269	15.3692	8.28267	11.396	9.84115	15.818
AT5G39160	TCV > Mock = NES	4.4853e-14	1.00503	1.4893	183.217	202.725	219.796	91.2058	114.153	96.4401	42.4264	64.0606	109.248
AT2G20560	TCV > Mock = NES	5.07372e-14	1.39598	1.57305	3333.28	2464.52	3240.7	727.214	1088.85	1618.43	929.212	794.862	1313.73
AT4G19645	TCV > Mock = NES	5.16254e-14	1.5445	1.49726	714.975	494.689	522.878	229.169	189.159	175.593	197.238	173.356	243.098
AT2G22480	TCV > Mock > NES	5.26246e-14	1.67027	1.15071	2088.94	2384.15	2021.29	663.682	581.665	795.137	705.675	827.413	1391.99
AT2G42360	TCV > Mock = NES	5.27356e-14	5.03162	4.83409	2890.35	1406.38	1527.83	96.4324	40.1963	41.4134	57.8566	77.2152	69.0998
AT5G16570	TCV > Mock = NES	5.61773e-14	3.36686	3.18247	2553.48	1426.92	2696	241.648	145.416	260.076	105.194	150.645	479.536
AT4G31685	TCV > Mock = NES	5.67324e-14	11.182	11.182	18.6601	33.9317	17.0813	0	0	0	0	0	0
AT5G47740	TCV > Mock = NES	5.9841e-14	11.4154	3.00285	20.6243	36.6106	24.673	0	0	0	7.01292	1.51402	1.66506
AT5G54960	TCV > Mock > NES	6.18394e-14	2.38546	1.04377	2165.55	1486.75	1473.74	373.25	215.169	392.599	944.991	813.787	727.629
AT5G66870	TCV > Mock = NES	6.4837e-14	3.56729	3.06031	25.5348	20.5376	14.2344	3.4035	0	1.65653	1.75323	3.78506	1.66506
AT3G44720	TCV > Mock = NES	6.59472e-14	1.91825	2.63738	12070.1	7130.13	8367.94	2571.91	2157.6	2564.32	1420.99	1325.53	1684.2
AT2G41480	TCV > Mock = NES	7.4829e-14	4.71483	3.43174	164.994	77.6858	135.701	1.1345	8.27572	4.9696	14.9025	15.1402	4.99517
AT2G21780	TCV > Mock = NES	7.50511e-14	2.32145	2.3387	48.1233	31.2529	51.2439	9.07599	7.09347	9.93921	8.76615	12.8692	4.16264
AT2G35060	TCV > Mock = NES	7.58282e-14	1.16483	1.63782	3248.81	4323.62	2945.58	1614.39	1526.28	1550.52	1055.44	959.89	1364.51
AT3G14990	TCV > Mock = NES	8.52651e-14	1.84932	1.59677	9960.54	6340.77	7728.34	2202.06	2290.01	2176.69	2933.15	2349.01	2662.42
AT1G74140	TCV > Mock > NES	8.65974e-14	14.149	2.70245	131.603	263.417	149.936	0	0	0	8.76615	16.6542	58.2769
AT1G62370	TCV > Mock = NES	9.41469e-14	2.70369	3.54072	486.144	363.427	239.138	70.3389	43.7431	53.0091	38.5711	24.9814	29.971
AT3G04040	TCV > Mock = NES	9.448e-14	1.44965	1.8022	186.601	138.406	130.957	52.187	56.7478	57.9787	27.1751	38.6076	64.9371
AT1G12940	TCV > Mock > NES	1.05693e-13	5.94057	2.61377	593.194	729.532	1206.13	22.69	3.54674	14.9088	78.0187	204.393	130.707
AT5G59390	TCV > Mock > NES	1.17018e-13	4.68857	2.1087	136.513	162.528	83.5152	2.269	5.91123	6.62614	40.3243	33.332	15.0188
AT5G23950	TCV > NES > Mock	1.18905e-13	2.00997	3.04699	135.531	81.2576	86.3555	32.9005	22.4627	19.8784	7.88953	12.1122	16.6506
AT3G47420	TCV > Mock = NES	1.18905e-13	1.7795	1.58396	17055.3	18273.1	12113.5	5298.11	4757.36	3763.65	5864.55	6158.29	3802.15
AT5G19590	TCV > Mock = NES	1.23457e-13	1.45631	1.53244	7679.11	10720.6	7936.16	3288.91	3124.67	3183.86	2618.45	2451.2	4034.43
AT3G25950	TCV > Mock = NES	1.25344e-13	10.8212	10.8212	24.5527	10.7153	18.9792	0	0	0	0	0	0
AT4G02600	TCV > Mock = NES	1.25677e-13	1.02256	1.17128	2937.49	2120.73	2277.51	1177.61	1263.82	1169.51	1055.44	987.143	1214.66
AT3G05165	TCV > Mock = NES	1.26898e-13	1.45105	1.83585	3960.8	3504.54	2432.58	1122.06	1105.08	1393.05	935.962	840.222	996.461
AT1G13540	TCV > Mock > NES	1.35891e-13	5.93847	2.90815	145.352	264.31	146.14	4.538	1.18225	3.31307	35.9412	27.2524	10.8229
AT5G41740	TCV > Mock = NES	1.37668e-13	1.63715	1.32489	11279.6	10271	8508.09	4055.66	2482.99	3124.94	5102.34	4414.58	2481.92
AT3G25290	TCV > Mock = NES	1.4333e-13	4.28525	3.76931	4192.62	2143.95	2432.19	73.7424	91.0329	284.924	206.004	192.281	244.763
AT2G38050	TCV > Mock = NES	1.46994e-13	1.34427	1.73125	555.873	351.818	443.165	193.999	177.337	160.684	150.778	120.365	135.702
AT1G51270	TCV > Mock = NES	1.49991e-13	3.62857	3.18721	3139.8	1700.16	1932.09	231.438	112.313	203.754	282.27	200.608	260.581
AT2G32660	TCV > Mock = NES	1.66978e-13	15.3967	9.60345	756.224	275.026	262.862	0	0	0	0.876615	0.757011	0
AT1G72150	TCV > Mock = NES	1.7808e-13	1.35214	1.35292	13140.6	10086.7	13719.1	3561.19	6496.44	4414.67	5641.02	4762.36	4061.07
AT5G14530	TCV > Mock > NES	1.8141e-13	2.82499	1.00508	883.898	1413.52	929.982	154.292	137.14	163.997	561.033	504.17	542.808
AT1G22370	TCV > Mock = NES	2.01283e-13	1.40901	1.11085	229.813	318.78	297.025	127.064	113.496	77.8571	151.654	107.496	132.372
AT4G30430	TCV > Mock > NES	2.07279e-13	2.73446	1.26033	344.72	278.597	276.148	48.7835	36.6496	49.696	185.842	135.505	54.1143
AT2G39660	TCV > Mock = NES	2.30704e-13	1.56972	1.51914	1485.93	1134.93	1022.98	436.782	477.627	313.085	520.709	445.88	304.705
AT4G18990	TCV > Mock > NES	2.55129e-13	2.21987	1.08252	147.316	119.654	140.446	46.5145	26.0094	14.9088	85.0316	67.374	39.9613
AT1G80610	TCV > Mock = NES	2.56573e-13	1.77069	1.86861	2230.37	1416.2	1625.57	634.185	524.917	385.973	431.294	508.712	503.679
AT1G18890	TCV > Mock = NES	2.61346e-13	1.27061	1.35583	5125.62	3646.74	3914.45	2060.25	1768.64	1429.59	1944.33	1531.43	1481.07
AT4G11340	TCV > Mock = NES	2.63345e-13	10.6343	3.21752	12.7674	18.7517	16.1323	0	0	0	3.50646	0.757011	0.832528
AT1G05620	TCV > Mock = NES	2.7045e-13	1.27141	1.06834	806.311	617.022	584.56	271.145	287.286	273.328	270.874	336.113	350.494
AT1G28040	TCV > Mock = NES	2.74891e-13	5.67967	12.5182	37.3201	89.294	49.346	3.4035	0	0	0	0	0
AT5G58070	TCV > Mock = NES	2.78888e-13	2.09121	1.85535	10385.8	6277.37	8195.92	1970.11	1897.56	1966.31	2768.06	1909.94	2192.19
AT3G14710	TCV > Mock > NES	3.11307e-13	5.30575	3.03778	201.332	350.033	185.047	7.94149	2.36449	8.28267	41.2009	31.7945	16.6506
AT2G32470	TCV > Mock = NES	3.1275e-13	5.46003	3.12297	22.5885	12.5083	16.1323	1.1345	0	0	3.50734	1.51402	0.832528
AT3G01085	TCV > Mock = NES	3.13083e-13	12.6609	12.6609	28.4811	95.5446	70.2231	0	0	0	0	0	0
AT2G23170	TCV > Mock > NES	3.14748e-13	6.2356	1.97023	341.774	612.557	327.392	6.80699	3.54674	6.62614	170.94	53.7478	102.401
AT1G19115	TCV > Mock = NES	3.16192e-13	4.79752	6.70698	33.3917	84.8293	58.8356	1.1345	3.54674	1.65653	0	0	1.66506
AT4G00550	TCV > Mock = NES	3.64819e-13	1.86886	1.8415	1531.11	2224.31	1429.14	486.7	412.604	520.152	512.82	428.468	505.344
AT1G12211	TCV > Mock > NES	3.85469e-13	3.81754	2.21114	121.781	67.1027	82.682	6.80699	2.36449	10.0618	22.8349	17.4113	18.3789
AT1G69790	TCV > Mock > NES	4.37539e-13	2.39017	1.06954	692.387	558.981	620.621	153.157	86.3039	117.614	413.762	322.487	155.683
AT3G51180	TCV > Mock = NES	4.43867e-13	1.19476	1.29306	339.81	421.468	312.208	203.075	146.598	119.271	158.667	162	117.386
AT4G19000	TCV > Mock > NES	4.48641e-13	11.3424	1.22061	21.6064	25.8953	30.3668	0	0	0	18.4089	8.32712	6.66022
AT4G23310	TCV > Mock > NES	5.38902e-13	7.97844	3.80991	5015.57	2105.55	2691.17	20.421	3.54674	14.9088	146.395	171.085	382.13
AT2G37150	TCV > Mock = NES	5.82645e-13	2.03386	2.12318	915.325	1367.98	861.657	302.911	211.622	253.45	221.784	202.879	297.212
AT3G47160	TCV > Mock > NES	6.12288e-13	4.04146	2.1997	471.412	241.987	374.84	37.4385	15.3692	13.2523	89.4147	90.8414	56.6119
AT3G14680	TCV > Mock = NES	6.32938e-13	5.1164	4.21967	74.6402	45.54	35.1116	1.1345	0	3.31307	2.62984	1.51402	4.16264
AT5G14180	TCV > Mock = NES	6.6458e-13	5.40928	5.63052	421.325	168.766	233.444	1.1345	8.27572	9.93921	7.88953	4.54207	4.16264
AT4G17500	TCV > Mock = NES	6.7879e-13	2.5026	2.87333	2179.3	1295.66	1388.33	427.706	314.477	115.957	312.075	197.58	154.018
AT3G04181	TCV > Mock = NES	6.99663e-13	3.17009	2.27973	58.9265	48.2188	32.2647	9.07599	4.72898	1.65653	10.5194	9.84115	8.32528
AT5G64110	TCV > Mock = NES	7.71827e-13	14.527	7.74687	178.744	393.787	135.701	0	0	0	1.75323	1.51402	0
AT5G55460	TCV > Mock > NES	8.15348e-13	4.11296	2.87569	1610.66	872.403	986.92	74.8769	29.5561	96.079	100.811	127.178	244.763
AT1G15010	TCV > NES > Mock	8.87401e-13	2.39586	4.62709	1997.61	984.913	1148.24	282.49	325.117	177.249	48.2138	84.7853	34.1336
AT5G24160	TCV > Mock = NES	8.89622e-13	3.59272	3.79691	7950.17	4165.57	4550.27	494.642	283.739	602.979	419.022	451.179	328.848
AT2G18700	TCV > Mock > NES	9.05609e-13	4.09849	2.31269	3643.62	1979.65	3660.14	216.689	217.533	107.675	909.926	504.927	453.728
AT3G13435	TCV > Mock > NES	9.05609e-13	6.19439	1.54586	60.8907	125.012	107.233	1.1345	1.18225	1.65653	43.8307	42.3926	14.153
AT1G54280	TCV > Mock > NES	9.07607e-13	6.17286	3.87742	224.903	427.718	212.567	7.94149	2.36449	1.65653	20.1621	21.1963	17.4831
AT3G05200	TCV > Mock = NES	9.12936e-13	2.36306	1.96472	2033.95	1247.44	1510.75	307.449	310.931	313.085	604.864	349.739	273.069
AT2G31880	TCV > Mock = NES	9.27036e-13	1.08297	1.63159	37998.8	25454.2	28852.1	15679.5	12763.2	15130.6	11279.1	9132.43	9378.26
AT2G41640	TCV > Mock = NES	9.60565e-13	1.94355	1.28768	3701.57	2824.37	2653.3	964.324	824.025	598.009	1619.11	1239.98	900.795
AT2G42280	TCV > Mock = NES	1.02041e-12	1.00291	1.11398	323.114	307.171	283.739	139.543	119.407	197.128	186.719	133.991	101.568
AT2G30750	TCV > Mock > NES	1.13065e-12	9.1398	1.64149	1617.53	1235.83	711.721	2.269	2.36449	1.65653	861.712	104.468	176.496
AT4G29770	TCV > Mock > NES	1.14675e-12	3.81596	2.35962	59.9086	113.403	101.539	3.4035	9.45796	6.62614	28.9283	12.1122	12.4879
AT1G61930	TCV > NES > Mock	1.15019e-12	1.13184	2.92017	101.157	75.8999	56.9377	31.766	23.6449	51.3526	6.1363	10.5982	14.153
AT3G06850	TCV > Mock = NES	1.16618e-12	1.1361	1.23843	1533.07	1044.74	1247.88	603.554	588.758	548.313	497.041	512.497	611.908
AT4G31230	TCV > Mock > NES	1.26232e-12	6.5912	3.61237	327.042	754.535	440.318	2.269	3.54674	9.93921	37.7111	40.8786	45.8207
AT1G30650	TCV > Mock = NES	1.30385e-12	10.3255	4.53226	11.7853	13.3941	13.2855	0	0	0	0.876615	0.757011	0
AT5G67520	TCV > Mock = NES	1.34326e-12	1.40364	1.37672	277.937	250.916	311.259	142.947	85.1217	89.4529	75.3889	91.5984	156.515
AT5G44610	TCV > Mock = NES	1.34448e-12	15.5652	9.23091	837.739	198.233	418.492	0	0	0	0.876615	1.51402	0
AT5G25110	TCV > Mock = NES	1.44218e-12	3.39737	2.7571	166.958	149.121	84.4576	7.94149	11.8225	18.2219	9.64276	28.7664	20.8132
AT5G11110	TCV > Mock = NES	1.44895e-12	2.86161	2.15832	1298.35	2183.24	1439.57	211.017	192.706	273.328	327.854	314.16	460.388
AT1G36640	TCV > Mock = NES	1.54943e-12	11.5352	3.72877	42.2307	25.8953	20.8771	0	0	0	3.50646	1.51402	1.66506
AT1G27020	TCV > Mock = NES	1.65534e-12	6.51318	5.01308	2855.97	1301.91	1327.6	18.152	15.3692	26.5046	69.2526	34.8225	65.7697
AT4G36670	TCV > Mock > NES	1.69142e-12	2.99287	1.90513	419.36	245.559	329.29	45.38	33.1029	46.383	107.824	114.309	43.2914
AT3G26580	TCV > Mock = NES	1.80422e-12	1.34329	1.66461	4921.35	3440.5	3348.88	1674.52	1324.11	1616.78	1460.44	1012.12	1221.32
AT3G24500	TCV > NES > Mock	1.91647e-12	1.25273	2.16259	4476.45	2872.59	4041.63	1024.45	1622.04	2133.62	817.882	546.562	1179.69
AT1G76820	TCV > Mock > NES	1.98019e-12	2.50996	1.07217	1819.03	1145.43	1332.28	284.072	200.218	270.025	752.929	760.198	530.403
AT3G04230	TCV > Mock > NES	2.17082e-12	3.06489	2.10547	618.728	1076.89	731.649	65.801	126.5	97.7356	219.154	198.337	146.525
AT5G53520	TCV > Mock = NES	2.28395e-12	10.1044	10.1044	11.7853	9.82234	11.3875	0	0	0	0	0	0
AT3G45040	TCV > Mock = NES	2.35145e-12	1.54656	2.05252	2443.49	1486.75	1782.15	775.997	536.739	642.736	493.534	448.908	434.579
AT3G60470	TCV > Mock > NES	2.39198e-12	4.49534	1.1439	123.746	201.805	193.588	10.2105	1.18225	11.5957	38.5711	68.131	128.209
AT3G16650	TCV > Mock > NES	2.51854e-12	2.60804	1.40123	347.666	593.805	491.562	74.8769	75.6637	84.4833	216.524	186.982	139.032
AT5G41550	TCV > Mock > NES	2.5786e-12	2.82869	1.34295	650.156	415.217	696.538	98.7014	53.201	96.079	278.763	246.786	169.003
ATMG00560	TCV > Mock = NES	2.60791e-12	10.9383	3.59389	23.5313	11.8109	23.4972	0	0	0	3.13828	0.845582	0.861666
AT5G61260	TCV > NES > Mock	2.63756e-12	1.08729	1.75779	94.2824	71.4352	66.4273	45.38	39.0141	24.848	17.5323	21.9533	29.1385
AT1G76700	TCV > Mock = NES	2.64466e-12	1.5367	1.59053	2386.52	1558.18	1688.2	675.027	650.235	616.231	692.526	585.927	591.927
AT2G48030	TCV > Mock = NES	2.70939e-12	1.25767	1.75123	221.957	359.855	308.412	106.643	126.5	139.149	85.0316	71.1591	108.229
AT1G56140	TCV > Mock > NES	2.74847e-12	2.13152	1.41501	1243.35	1571.57	1183.35	370.981	256.547	284.924	736.356	496.599	266.409
AT1G43310	TCV > Mock > NES	2.76335e-12	5.67288	2.55162	27.8732	38.6277	20.2698	0	0	1.67144	2.45803	6.19462	6.12241
AT4G23230	TCV > Mock = NES	2.87059e-12	3.43062	2.68074	1374.95	2352	1390.23	206.479	54.3833	213.693	252.465	272.524	273.069
AT1G77240	TCV > Mock = NES	2.9482e-12	5.90619	4.92284	48.1233	33.0388	19.951	0	0	1.65653	0.876615	0.758525	1.66922
AT2G37060	TCV > Mock = NES	2.97495e-12	1.41764	1.52563	199.368	314.315	260.015	81.6839	121.771	86.1398	85.9082	95.3834	87.4154
AT1G11210	TCV > Mock > NES	3.07243e-12	2.74134	1.74883	495.965	341.103	313.157	72.6079	16.5514	82.8267	116.59	74.9441	150.687
AT3G14050	TCV > Mock = NES	3.12683e-12	2.64889	2.34779	9771	5907.69	6132.19	1427.2	789.74	1260.62	1695.37	1183.97	1405.31
AT2G27390	TCV > Mock = NES	3.34333e-12	10.5847	5.66725	19.6422	17.8588	8.54065	0	0	0	0.876615	0	0
AT5G39100	TCV > Mock = NES	3.41971e-12	11.0878	1.99961	23.5706	16.0729	25.622	0	0	0	3.50646	5.29908	7.49275
AT2G37940	TCV > Mock = NES	3.51597e-12	1.29005	1.35409	4607.07	3157.44	3348.88	1673.39	1365.49	1505.79	1546.35	1356.56	1444.44
AT2G16586	TCV > Mock = NES	3.55005e-12	1.83431	2.2721	915.934	1420.8	1656.13	428.672	275.221	415.79	240.753	277.823	308.035
AT1G02920	TCV > Mock > NES	3.56359e-12	5.24328	2.04509	14182.1	7823.49	7633.15	448.823	72.117	261.517	2884.67	2243.17	2053.82
AT3G48300	TCV > Mock = NES	3.57014e-12	3.649	2.0408	30.4454	27.6812	19.9282	4.538	0	1.65653	3.50646	3.78506	11.6554
AT2G20960	TCV > Mock = NES	3.7258e-12	1.91354	1.4549	7510.18	5381.75	5538.14	1620.06	1262.64	2009.38	3133.9	2036.36	1552.66
AT4G21230	TCV > Mock = NES	3.97671e-12	3.10541	2.03807	42.2307	25.8953	29.4178	1.1345	3.54674	6.62614	5.25969	6.8131	11.6554
AT2G34610	TCV > Mock > NES	4.03166e-12	13.9359	3.66488	75.6224	216.092	178.405	0	0	0	3.50646	14.3832	19.1481
AT1G51620	TCV > Mock > NES	4.25349e-12	3.30806	1.67388	267.134	402.716	242.934	41.9765	15.3692	34.7872	131.492	69.645	84.9178
AT2G24285	TCV > Mock > NES	4.32288e-12	8.59276	4.33955	229.813	97.3305	122.416	1.1345	0	0	10.5194	8.32712	3.33011
AT1G01140	TCV > Mock = NES	4.41847e-12	1.81475	2.10704	9596.18	8125.76	6352.35	4014.99	1415.15	1413.02	1773.39	1367.16	2447.63
AT4G33420	TCV > NES > Mock	4.65017e-12	2.53406	3.63322	1084.25	529.514	1022.98	107.777	236.449	110.988	81.5252	64.346	66.6022
AT2G04420	TCV > Mock = NES	4.94715e-12	3.88837	2.15702	21.6064	26.7882	19.9282	3.4035	1.18225	0	6.1363	8.32712	0.832528
AT4G13890	TCV > Mock > NES	5.00644e-12	15.2724	4.77668	642.299	266.989	278.046	0	0	0	4.38307	10.5982	28.3059
AT3G01360	TCV > Mock = NES	5.05895e-12	1.47126	1.06234	505.786	710.78	507.694	200.806	205.711	215.35	291.036	265.711	268.906
AT4G19720	TCV > Mock = NES	5.05995e-12	4.14154	4.63787	15.7137	14.287	11.3875	1.1345	1.18225	0	0.876615	0.757011	0
AT1G67990	TCV > Mock = NES	5.3777e-12	6.18341	11.52	14.7316	41.0753	32.2647	0	1.18225	0	0	0	0
AT1G69920	TCV > Mock > NES	5.8028e-12	13.3559	4.18126	161.066	80.3646	73.07	0	0	0	7.01292	5.29908	4.99517
AT4G04990	TCV > Mock = NES	6.26665e-12	10.0498	10.0498	6.87476	11.6082	13.2855	0	0	0	0	0	0
AT5G50270	TCV > Mock = NES	6.29474e-12	10.0619	10.0619	9.82109	8.9294	13.2855	0	0	0	0	0	0
AT2G41451	TCV > Mock = NES	6.41398e-12	5.28962	5.39871	24.5527	55.3623	32.2647	0	1.18225	1.65653	2.62984	0	0
AT1G44160	TCV > Mock = NES	6.50091e-12	12.2288	4.90734	71.6939	42.8611	29.4178	0	0	0	0	2.27103	2.49758
AT2G16700	TCV > Mock = NES	6.52223e-12	1.17832	1.23311	779.794	527.728	603.539	279.087	308.566	256.763	248.959	280.094	283.892
AT4G33840	TCV > Mock = NES	6.73728e-12	15.2876	15.2876	143.388	714.525	341.947	0	0	0	0	0	0
AT1G63450	TCV > Mock = NES	7.07823e-12	3.74887	4.7501	9.82109	16.0729	20.8771	2.269	1.18225	0	0.876615	0	0.832528
AT3G14460	TCV > Mock = NES	7.96441e-12	1.79438	1.66707	146.334	221.95	181.252	63.532	23.6449	71.231	79.7719	41.6356	51.6167
AT2G35000	TCV > Mock = NES	8.00127e-12	2.04475	1.80509	69.7297	52.6835	47.4481	22.69	3.54674	14.9088	14.9025	21.1963	12.4879
AT1G21695	TCV > Mock = NES	8.89067e-12	2.01107	3.53143	25.5348	36.6106	21.8261	11.345	1.18225	8.28267	0.876615	3.02805	3.33011
AT1G08630	TCV > Mock > NES	9.06375e-12	5.00501	2.23023	167.941	364.32	282.79	10.2105	3.54674	11.5957	34.188	45.4207	94.0756
AT5G15853	TCV > Mock > NES	9.14724e-12	4.91362	2.87852	36.338	76.7929	55.9887	2.269	0	3.31307	5.25969	6.05609	11.6554
AT5G64010	TCV > Mock = NES	9.40181e-12	1.69919	1.36293	361.416	525.942	379.585	154.292	101.673	134.179	166.557	128.692	197.309
AT1G51920	TCV > Mock > NES	9.60243e-12	14.0403	1.3794	213.118	166.087	126.212	0	0	0	143.765	28.0094	22.4782
AT4G18870	TCV > Mock = NES	9.75353e-12	3.83824	3.6694	25.5348	16.0729	33.2136	0	3.54674	1.65653	3.50646	1.51402	0.832528
AT1G62200	TCV > Mock = NES	9.82292e-12	1.19879	1.06526	1673.51	1213.51	1225.11	646.665	495.361	649.362	676.747	646.488	641.879
AT1G29280	TCV > Mock = NES	9.85234e-12	3.25076	2.88523	49.1054	33.9317	26.5709	7.94149	3.54674	0	7.01292	5.29908	2.49758
AT2G33130	TCV > Mock = NES	9.89164e-12	12.9962	6.20237	53.0339	130.369	61.6825	0	0	0	0.876615	0.757011	1.66506
AT1G01355	TCV > Mock = NES	1.04526e-11	6.31825	4.64961	59.9086	88.4011	35.1116	2.269	0	0	1.75323	3.02805	2.49758
AT4G09250	TCV > Mock = NES	1.07261e-11	12.5247	5.87983	90.683	33.554	52.5136	0	0	0	0	0	2.97212
AT1G02930	TCV > Mock > NES	1.15056e-11	4.63581	1.66929	15360.7	9974.59	7601.47	910.307	102.855	311.644	3642.61	3150.54	3562.41
AT3G57770	TCV > Mock > NES	1.16336e-11	3.25321	1.45916	414.45	558.981	325.494	51.0525	52.0188	33.1307	221.784	141.561	109.061
AT2G40113	TCV > Mock = NES	1.20345e-11	11.2431	3.44617	33.3917	24.1094	15.1834	0	0	0	2.62984	1.51402	2.49758
AT2G15220	TCV > Mock = NES	1.29061e-11	3.89896	3.51726	254.366	188.41	110.08	13.614	11.8225	11.5957	11.396	14.3832	22.4782
AT4G20860	TCV > Mock > NES	1.2959e-11	2.85539	1.77279	6942.53	4487.03	4834.01	1119.75	711.712	415.79	2315.14	1469.36	974.89
AT1G65790	TCV > Mock = NES	1.35866e-11	3.17729	2.63469	3243.28	1695.53	2248.14	312.646	66.5096	415.303	325.806	326.778	504.633
AT2G44500	TCV > Mock = NES	1.44714e-11	1.0181	1.32235	4071.82	3577.12	3079.38	2133.99	1950.7	1212.58	1763.75	1489.8	1036.5
AT4G14580	TCV > Mock = NES	1.44974e-11	1.12628	1.45609	152.227	125.012	123.365	46.5145	42.5608	94.4225	56.98	34.0655	54.9468
AT5G49340	TCV > Mock = NES	1.49225e-11	14.6086	14.6086	121.781	447.363	180.303	0	0	0	0	0	0
AT5G08760	TCV > NES > Mock	1.61317e-11	1.46553	2.54581	6499.59	4411.13	3729.42	1559.94	1579.48	2161.78	808.239	662.385	1036.5
AT5G49450	TCV > Mock = NES	1.61696e-11	2.40629	2.53434	473.376	250.916	418.492	76.0114	98.1264	41.4134	56.98	79.4862	60.7745
AT4G02075	TCV > Mock = NES	1.67938e-11	1.53558	1.28446	721.85	516.12	497.256	221.227	178.519	198.784	274.38	191.524	246.428
AT1G04445	TCV > Mock = NES	1.69452e-11	2.73529	4.81407	14.7316	18.7517	13.2855	2.269	4.72898	0	0.876615	0.757011	0
AT1G65484	TCV > Mock > NES	1.74001e-11	3.9793	1.77019	322.132	157.157	268.556	26.0935	4.72898	16.5653	72.759	75.7011	70.7648
AT5G59530	TCV > Mock > NES	1.77866e-11	15.865	3.90737	382.04	966.161	442.216	0	0	0	37.6944	49.9627	31.636
AT2G39000	TCV > Mock > NES	1.80921e-11	1.92524	1.16286	3631.84	2867.23	2354.37	931.424	718.805	680.836	1366.64	1093.12	1494.39
AT1G21760	TCV > Mock = NES	1.91187e-11	1.2088	1.14053	1906.27	2647.57	1892.23	948.381	912.702	927.66	1069.48	947.778	906.622
AT3G63052	TCV > Mock = NES	1.98994e-11	5.26316	3.04741	10.8032	20.5376	15.1834	0	1.18225	0	0	2.27103	3.33011
[truncated: 1,909 more rows]

## Sheet: TCV-specific_Down_DEGs
gene	Pattern	padj	Log2(TCV/Mock)	Log2(TCV/NES)	TCV_1	TCV_2	TCV_3	Mock_1	Mock_2	Mock_3	NES_1	NES_2	NES_3
AT4G20130	TCV < Mock < NES	-2.22045e-16	-1.50315	-1.002	564.712	1133.14	726.904	2330.26	2384.59	2158.46	1621.74	1709.33	1525.19
AT1G61770	TCV < Mock = NES	-2.22045e-16	-1.00626	-1.01082	659.977	574.161	651.936	1247.95	1442.34	1098.28	1150.12	1305.09	1345.36
AT1G19950	TCV < Mock < NES	-2.22045e-16	-3.03463	-1.02038	40.2664	53.5764	44.6012	385.73	338.122	410.821	76.2655	77.2152	127.377
AT1G04640	TCV < Mock < NES	-2.22045e-16	-1.35402	-1.02794	737.563	613.45	557.989	1549.73	1877.41	1452.78	1351.74	1367.92	1173.03
AT4G14150	TCV < Mock < NES	-2.22045e-16	-2.67714	-1.05386	26.5169	22.3235	41.7543	221.227	184.43	173.936	56.1033	78.7292	53.2818
AT1G78110	TCV < Mock < NES	-2.22045e-16	-1.93856	-1.05661	166.958	139.299	224.904	595.612	769.642	670.897	289.283	378.506	437.077
AT4G21430	TCV < Mock < NES	-2.22045e-16	-1.44262	-1.06305	260.259	191.089	287.535	642.127	673.88	692.432	513.696	564.73	465.383
AT1G31180	TCV < Mock = NES	-2.22045e-16	-1.42377	-1.08802	600.068	582.83	688.472	1483.13	1898.62	1638.94	1513.32	1395.18	1069.72
AT4G33810	TCV < Mock < NES	-2.22045e-16	-3.45702	-1.1003	10.8032	20.5376	25.622	190.596	219.898	215.35	31.5581	43.1496	47.4541
AT1G71720	TCV < Mock < NES	-2.22045e-16	-2.45821	-1.12123	434.092	300.028	396.666	1944.53	2483.9	1785.74	797.719	872.077	790.069
AT4G12320	TCV < Mock < NES	-2.22045e-16	-1.93007	-1.12221	814.741	338.098	297.83	1849.29	1765.01	1913.89	1155.52	1034.52	967.805
ATCG00420	TCV = NES < Mock	-2.22045e-16	-2.9191	-1.12822	5.89265	7.14352	3.79585	38.573	50.8366	38.1003	11.396	12.1122	13.3204
AT3G08680	TCV < Mock < NES	-2.22045e-16	-2.10165	-1.14676	342.756	266.989	521.929	1381.82	1659.87	1815.56	709.181	918.255	878.317
AT2G35260	TCV < Mock < NES	-2.22045e-16	-1.60199	-1.14709	2951.24	3286.91	2986.38	9596.73	9968.69	8436.73	6544.81	6564.05	7320.41
AT1G26180	TCV < Mock < NES	-2.22045e-16	-1.48624	-1.16067	437.038	407.181	377.687	1161.73	1188.16	1073.43	936.225	937.18	858.336
AT4G18460	TCV < Mock < NES	-2.22045e-16	-2.44888	-1.18868	58.9265	72.3282	72.1211	333.543	453.982	323.024	142.012	122.636	198.974
AT1G78060	TCV < Mock < NES	-2.22045e-16	-2.1	-1.20952	252.402	180.374	410.9	969.997	1272.1	1374.92	636.422	674.497	640.214
AT3G14210	TCV < Mock < NES	-2.22045e-16	-2.8616	-1.21257	7347.15	10000	6719.59	48581.5	55843.4	70497.2	21473.6	18767.8	15533.3
AT5G05830	TCV < Mock = NES	-2.22045e-16	-1.23741	-1.24788	239.634	197.34	210.669	496.911	582.847	447.264	483.891	539.749	514.502
AT1G17830	TCV < Mock < NES	-2.22045e-16	-2.31185	-1.25019	59.9086	41.0753	74.019	317.66	289.65	261.733	125.356	171.085	119.884
AT5G20820	TCV < Mock < NES	-2.22045e-16	-4.49218	-1.26911	0.982109	2.67882	6.64273	99.8359	78.0282	54.6656	7.01292	4.54207	13.3204
AT4G32570	TCV < Mock = NES	-2.22045e-16	-1.60997	-1.27529	515.607	400.037	478.276	1255.89	1670.51	1328.54	1179.05	1180.94	1014.02
AT4G03070	TCV < Mock < NES	-2.22045e-16	-2.1721	-1.28652	248.473	165.194	272.352	846.336	1162.15	1083.37	520.709	570.03	582.769
AT3G60530	TCV < Mock < NES	-2.22045e-16	-1.8822	-1.30274	110.978	48.2188	156.579	348.291	406.692	409.164	246.329	259.655	273.069
AT1G68080	TCV < Mock = NES	-2.22045e-16	-1.20375	-1.3089	166.958	132.155	130.008	363.04	323.935	301.489	374.315	396.674	292.217
AT2G34640	TCV < Mock < NES	-2.22045e-16	-2.0972	-1.32303	418.378	297.349	474.481	1820.87	1729.62	1542.23	1017.75	1090.1	869.991
AT1G20720	TCV < Mock < NES	-2.22045e-16	-2.57417	-1.34019	25.5348	49.1117	29.4178	203.075	199.799	217.006	79.7719	93.8369	89.913
AT3G56940	TCV < Mock < NES	-2.22045e-16	-2.32656	-1.34178	18117	15426.4	15712	77443.2	94021.6	75604.3	45464.7	40718.1	38661.7
AT3G03710	TCV < Mock = NES	-2.22045e-16	-1.41367	-1.34736	1245.84	1101.42	1431.87	3158.07	3475.7	3434.43	3151.73	3462.45	3001.72
AT2G30695	TCV < Mock < NES	-2.22045e-16	-2.27657	-1.37695	350.613	314.315	350.167	1580.36	1973.17	1364.98	755.642	875.105	1005.69
AT3G07420	TCV < Mock < NES	-2.22045e-16	-1.86364	-1.37861	116.871	109.832	101.539	439.051	329.846	425.729	294.543	271.767	287.222
AT1G11840	TCV < Mock = NES	-2.22045e-16	-1.32146	-1.38366	3373.54	4674.54	4146.01	11086.3	9209.69	10179.4	9363.12	10648.9	11806.1
AT4G03010	TCV < Mock < NES	-2.22045e-16	-2.44567	-1.39781	26.5169	18.7517	34.1626	162.233	118.225	152.401	63.1163	61.3179	84.9178
AT2G38810	TCV < Mock = NES	-2.22045e-16	-1.44951	-1.40825	32.4096	52.6835	27.5199	97.5669	112.313	97.7356	112.207	97.6545	89.0804
AT5G53860	TCV < Mock < NES	-2.22045e-16	-2.10756	-1.40998	822.025	718.817	885.381	3280.97	3842.3	3332.95	2247.64	2174.14	2025.54
AT5G07800	TCV < Mock < NES	-2.22045e-16	-2.41552	-1.41401	23.5706	50.8976	77.8148	249.59	281.374	281.611	121.849	140.804	143.195
AT1G79620	TCV < Mock = NES	-2.22045e-16	-1.41273	-1.43108	100.175	182.16	200.231	398.209	391.323	495.304	377.821	498.87	424.589
AT3G17350	TCV < Mock < NES	-2.22045e-16	-2.96677	-1.46148	13.7495	7.14352	18.0303	93.0289	108.767	102.705	35.9412	36.3365	34.9662
AT3G57600	TCV < Mock = NES	-2.22045e-16	-1.79705	-1.4704	203.296	144.656	266.658	715.869	676.244	743.784	564.54	687.366	451.23
AT4G12430	TCV < Mock < NES	-2.22045e-16	-3.2734	-1.47673	124.728	93.7587	105.335	1270.64	894.96	965.76	264.738	286.907	349.662
AT1G28400	TCV < Mock < NES	-2.22045e-16	-2.10102	-1.50153	494.001	328.602	466.889	1759.61	1753.27	2019.32	985.315	1392.9	1272.93
AT4G30950	TCV < Mock < NES	-2.22045e-16	-1.91515	-1.51735	5490.97	4503.1	4923.21	17779.9	20307.4	18173.8	14362.5	14718.6	13621.8
AT5G38010	TCV < Mock < NES	-2.22045e-16	-2.14931	-1.53056	24.5527	15.18	61.5288	164.502	132.411	152.401	79.7719	111.546	101.282
AT4G38660	TCV < Mock < NES	-2.22045e-16	-3.61138	-1.53277	33.3917	26.7882	103.437	533.215	774.371	692.432	120.973	146.86	205.634
AT3G11490	TCV < Mock < NES	-2.22045e-16	-2.88509	-1.54282	384.004	373.249	404.257	2835.11	3408.41	2337.37	1091.39	1192.29	1100.6
AT2G16380	TCV < Mock < NES	-2.22045e-16	-2.17645	-1.55458	330.971	226.807	243.883	1274.04	1170.42	1179.45	872.232	818.329	664.357
AT4G09510	TCV < Mock < NES	-2.22045e-16	-1.89362	-1.56374	117.853	91.0799	167.966	485.566	485.903	429.043	352.399	358.066	403.776
AT1G15410	TCV < Mock < NES	-2.22045e-16	-3.10839	-1.56816	412.486	238.672	331.187	2727.34	2320.75	3424.06	852.946	864.507	1195.51
AT5G19670	TCV < Mock = NES	-2.22045e-16	-1.46128	-1.57819	102.139	116.975	143.293	330.139	288.468	379.346	353.276	337.627	391.288
AT1G78630	TCV < Mock < NES	-2.22045e-16	-2.78534	-1.59424	1864.04	1386.74	1877.05	10780	13667.9	10903.3	5293.88	5137.08	5051.78
AT5G02160	TCV < Mock < NES	-2.22045e-16	-3.15772	-1.6133	897.647	584.876	845.524	6594.84	9047.72	5133.6	2479.94	2430.76	2212.03
AT2G40120	TCV < Mock = NES	-2.22045e-16	-1.63287	-1.65425	107.024	108.939	121.467	380.649	334.575	331.307	367.267	362.608	332.285
AT3G12170	TCV < Mock < NES	-2.22045e-16	-2.89533	-1.65616	5.89265	25.8953	11.3875	95.2979	130.047	96.079	44.7074	43.1496	48.2866
AT2G40690	TCV < Mock < NES	-2.22045e-16	-2.34391	-1.65626	100.175	68.7564	98.692	420.899	498.908	438.982	284.023	240.73	318.858
AT5G23530	TCV < Mock < NES	-2.22045e-16	-2.58133	-1.6723	5.89265	10.7153	33.2136	110.046	108.767	79.5137	40.3243	55.2618	63.2721
AT5G45290	TCV < Mock < NES	-2.22045e-16	-1.92755	-1.69043	267.134	309.85	334.034	1201.43	1127.86	1136.38	907.296	1009.1	1024.01
AT1G31800	TCV < Mock < NES	-2.22045e-16	-2.85206	-1.69795	799.436	969.733	969.838	6887.54	6673.78	6215.32	2557.96	2548.86	3779.68
AT5G62100	TCV < Mock < NES	-2.22045e-16	-2.97597	-1.69907	51.0696	41.0753	127.161	434.513	555.655	735.501	234.056	256.627	221.452
AT1G18840	TCV < Mock = NES	-2.22045e-16	-1.7982	-1.71272	215.082	736.676	563.683	1586.03	1782.83	1901.7	1378.04	1682.84	1906.49
AT3G53760	TCV < Mock = NES	-2.22045e-16	-1.63798	-1.73168	89.3719	91.9729	120.518	306.315	325.117	308.115	266.491	340.655	395.451
AT5G27360	TCV < Mock < NES	-2.22045e-16	-3.71924	-1.7721	89.3719	82.1505	188.843	1314.88	1925.88	1505.79	328.731	420.141	482.033
AT3G44740	TCV < Mock = NES	-2.22045e-16	-1.75089	-1.77366	70.7118	66.0776	95.8451	237.11	299.108	246.824	306.815	283.879	204.802
AT3G46610	TCV < NES < Mock	-2.22045e-16	-1.24671	-1.7828	602.033	536.657	585.509	1363.67	1334.76	1393.15	2044.27	2053.77	1834.89
AT4G35560	TCV < Mock < NES	-2.22045e-16	-2.28394	-1.789	162.048	233.95	270.454	984.745	1003.73	1257.31	713.564	697.964	891.637
AT3G15570	TCV < Mock < NES	-2.22045e-16	-3.11422	-1.79729	56.9623	52.6835	66.4273	496.911	608.849	419.103	184.966	206.664	220.415
AT4G18780	TCV < Mock = NES	-2.22045e-16	-2.08743	-1.80574	124.728	130.369	243.883	661.413	693.978	765.319	507.558	735.815	501.182
AT5G43870	TCV < Mock < NES	-2.22045e-16	-3.09935	-1.81622	141.424	101.909	187.894	1064.16	1457.71	1174.12	453.21	514.335	551.133
AT1G19940	TCV < Mock < NES	-2.22045e-16	-3.90527	-1.83585	2.94633	4.4647	92.0492	412.958	567.478	510.213	84.155	121.122	149.855
AT5G66080	TCV < Mock = NES	-2.22045e-16	-2.05238	-1.83677	42.2307	34.8247	84.4576	207.613	271.916	190.502	190.225	195.309	191.481
AT2G31790	TCV < Mock < NES	-2.22045e-16	-2.45744	-1.86381	592.211	625.058	657.63	3921.96	2931.97	3443.94	2013.58	2251.35	2559.19
AT5G57700	TCV < Mock < NES	-2.22045e-16	-2.78243	-1.86871	69.7297	58.9341	126.212	524.139	576.936	652.675	254.218	302.048	374.637
AT1G23170	TCV < Mock = NES	-2.22045e-16	-2.28084	-1.88807	117.853	82.1505	206.874	684.103	571.025	722.249	350.646	568.516	586.932
AT2G02740	TCV < NES < Mock	-2.22045e-16	-1.15795	-1.90605	175.797	115.189	201.18	340.35	373.59	384.316	660.091	694.179	490.359
AT2G13570	TCV < Mock < NES	-2.22045e-16	-3.44143	-1.93258	1.96422	8.03646	4.74481	47.649	53.201	59.6353	19.2855	12.1122	24.9758
AT3G45610	TCV < Mock < NES	-2.22045e-16	-2.88076	-1.94831	27.499	6.25058	24.673	145.216	139.505	145.775	73.6356	79.4862	72.4299
AT5G18060	TCV < Mock = NES	-2.22045e-16	-2.54184	-2.046	2.94633	18.7517	14.2344	71.4734	56.7478	81.1702	55.2267	49.9627	43.2914
AT1G15260	TCV < Mock < NES	-2.22045e-16	-3.15716	-2.05868	220.974	165.194	233.444	1549.73	1885.68	2092.2	975.672	869.806	735.954
ATCG00770	TCV < Mock = NES	-2.22045e-16	-2.39316	-2.06324	26.5169	30.36	18.0303	122.526	125.318	145.775	114.837	98.4115	99.9033
AT1G70020	TCV < Mock = NES	-2.22045e-16	-1.7969	-2.08784	32.4096	17.8588	28.4688	89.6254	86.3039	97.7356	106.07	135.505	93.2431
AT2G21080	TCV < Mock < NES	-2.22045e-16	-2.52277	-2.09031	95.2645	92.8658	63.5804	507.121	474.08	465.486	363.795	370.179	338.006
AT5G38110	TCV < Mock = NES	-2.22045e-16	-1.72067	-2.10678	74.6402	115.189	92.9982	370.981	364.132	197.128	394.477	445.88	377.968
AT1G52245	TCV < Mock < NES	-2.22045e-16	-5.06665	-2.11005	0.982109	5.35764	3.79585	121.391	134.776	84.4833	9.64276	15.8972	18.3156
AT3G53170	TCV < Mock < NES	-2.22045e-16	-2.94971	-2.15751	56.9623	49.1117	40.8053	383.461	368.861	382.66	184.966	249.814	220.62
AT3G14980	TCV < Mock < NES	-2.22045e-16	-2.59328	-2.1946	168.923	139.299	306.514	1201.43	1130.23	1378.24	867.849	978.059	968.23
AT2G41990	TCV < Mock < NES	-2.22045e-16	-6.52931	-2.23109	0	0	3.79585	122.526	167.879	62.9483	4.38307	6.05609	7.49275
AT1G57610	TCV < Mock = NES	-2.22045e-16	-2.02262	-2.23927	385.969	317.887	353.014	1449.89	1713.07	1131.41	1700.63	1858.46	1431.11
AT3G62050	TCV < Mock < NES	-2.22045e-16	-2.89456	-2.27154	7.85687	9.82234	15.1834	78.2804	93.3974	72.8875	56.98	56.0188	45.789
AT3G45710	TCV < Mock < NES	-2.22045e-16	-3.16874	-2.30361	4.91054	3.57176	11.3875	53.3215	70.9347	54.6656	32.4347	41.6356	24.1433
AT4G04630	TCV < Mock = NES	-2.22045e-16	-2.09976	-2.32339	35.3559	34.8247	45.5501	164.502	139.505	192.158	184.089	218.776	176.496
AT5G55730	TCV < Mock < NES	-2.22045e-16	-4.48163	-2.33299	11.7853	4.4647	303.668	1748.26	2429.51	2970.17	451.457	433.767	726.797
AT4G36540	TCV < Mock = NES	-2.22045e-16	-2.61729	-2.33501	427.217	200.019	506.745	2231.56	3008.81	1717.83	1858.42	2108.28	1754.97
AT1G07880	TCV < Mock = NES	-2.22045e-16	-2.46292	-2.33563	24.5527	32.1459	38.9074	183.789	192.706	150.745	148.148	184.711	149.855
AT5G67550	TCV < Mock = NES	-2.22045e-16	-2.10514	-2.3407	16.6958	2.67882	16.1323	54.456	43.7431	54.6656	56.98	68.888	54.1143
AT3G17170	TCV < Mock = NES	-2.22045e-16	-2.40737	-2.3491	272.044	171.445	344.473	1361.4	1735.54	1083.37	1447.29	1543.55	1024.01
AT2G01830	TCV < Mock < NES	-2.22045e-16	-3.44007	-2.34935	52.0518	66.9705	218.261	1281.98	1201.16	1177.8	497.917	520.824	700.156
AT2G33400	TCV < Mock < NES	-2.22045e-16	-3.22272	-2.3509	42.2307	21.4306	58.8356	409.554	349.945	384.316	171.909	224.178	228.945
AT4G24260	TCV < NES < Mock	-2.22045e-16	-1.71406	-2.35115	11.7853	18.7517	41.7543	72.6079	85.1217	79.5137	99.0575	131.72	138.2
AT5G45940	TCV < Mock < NES	-2.22045e-16	-2.82673	-2.37892	119.817	81.2576	174.609	853.143	965.894	846.489	615.384	666.17	672.682
AT5G22640	TCV < Mock < NES	-2.22045e-16	-3.18174	-2.37995	1075.41	722.389	1499.36	9617.15	11064.6	9236.84	5523.55	6199.17	5439.73
AT2G42200	TCV < NES < Mock	-2.22045e-16	-1.88327	-2.38329	52.0518	51.7905	112.926	240.514	224.627	334.62	319.088	442.332	369.642
AT1G04420	TCV < Mock = NES	-2.22045e-16	-2.47864	-2.38824	828.9	584.876	773.403	4038.82	4504.35	3647.69	3817.66	4012.92	3619.83
AT5G44040	TCV < Mock < NES	-2.22045e-16	-3.16696	-2.39979	66.7834	41.0753	56.9377	504.852	508.366	467.143	318.211	354.281	197.309
AT5G45540	TCV < Mock < NES	-2.22045e-16	-3.60371	-2.41175	10.8032	8.03646	14.2344	132.736	120.589	149.088	46.4606	68.888	60.7745
AT1G30520	TCV < Mock < NES	-2.22045e-16	-3.80241	-2.42575	77.5866	52.6835	102.488	1085.72	1254.36	907.781	341.003	486.001	423.757
AT5G35960	TCV < Mock < NES	-2.22045e-16	-3.46077	-2.52538	2.94633	2.67882	9.48961	62.3975	49.6543	54.6656	21.9154	30.2805	34.9662
AT2G27402	TCV < Mock = NES	-2.22045e-16	-3.23927	-2.53722	411.503	79.4717	1077.07	4145.46	5457.24	5204.83	3467.89	3649.55	1984.75
AT5G19650	TCV < Mock < NES	-2.22045e-16	-3.19575	-2.60591	5.89265	10.7153	18.0303	129.333	100.491	87.7963	52.5969	81.0002	77.4251
AT4G36180	TCV < Mock = NES	-2.22045e-16	-3.07338	-2.61628	26.5169	23.2164	69.2742	308.584	282.557	410.821	199.868	270.253	259.749
AT5G16000	TCV < Mock < NES	-2.22045e-16	-4.77715	-2.62741	78.5687	37.5035	117.671	1697.21	2849.21	1863.6	377.821	565.487	501.182
AT2G22620	TCV < Mock < NES	-2.22045e-16	-3.50033	-2.65533	8.83898	10.7153	13.2855	125.929	130.047	115.957	78.8953	75.7011	52.4492
AT4G37490	TCV < NES < Mock	-2.22045e-16	-2.0726	-2.75644	7.85687	16.9659	16.1323	73.7424	63.8413	34.7872	101.687	96.1404	79.0901
AT5G64080	TCV < Mock < NES	-2.22045e-16	-3.96668	-2.78748	13.7495	32.1459	16.1323	285.894	346.398	337.933	119.22	180.169	129.042
AT1G04760	TCV < Mock < NES	-2.22045e-16	-4.16416	-2.80414	0.982109	4.4647	0.948961	39.7075	30.7384	44.7264	21.9154	12.1122	10.8229
AT5G06270	TCV < NES < Mock	-2.22045e-16	-2.04638	-2.8203	32.4096	28.5741	179.354	271.145	368.861	352.842	523.339	570.787	603.582
AT4G16807	TCV < Mock = NES	-2.22045e-16	-3.2033	-2.82397	10.8032	5.35764	6.64273	61.263	82.7572	66.2614	50.8437	49.2057	61.607
AT4G04750	TCV < Mock < NES	-2.22045e-16	-3.91343	-2.9231	67.7655	53.5764	210.669	1722.17	1215.35	2065.7	776.681	758.525	983.215
AT1G34065	TCV < Mock < NES	-2.22045e-16	-3.58603	-2.92366	6.87476	10.7153	45.5501	212.151	281.374	265.046	161.297	175.627	142.362
AT1G19050	TCV < Mock < NES	-2.22045e-16	-4.0224	-2.93642	257.312	64.2917	297.025	3295.72	4251.35	2506.34	1523.56	1498.13	1714.17
AT1G70830	TCV < Mock = NES	-2.22045e-16	-3.39537	-2.99401	59.9086	4.4647	552.295	2367.7	1875.04	2246.26	1699.76	2246.81	966.564
AT1G15570	TCV < Mock < NES	-2.22045e-16	-4.4999	-3.04607	8.83898	8.9294	26.5709	350.56	378.319	274.985	83.2784	132.477	150.687
AT3G10940	TCV < Mock < NES	-2.22045e-16	-3.83113	-3.0652	91.3361	89.294	113.875	1339.84	1351.31	1500.82	773.174	747.927	944.086
AT1G29660	TCV < Mock < NES	-2.22045e-16	-4.22576	-3.12418	568.641	66.9705	3313.77	16766.8	29662.5	27465.3	10955.1	12838.2	10642.2
AT4G11450	TCV < NES < Mock	-2.22045e-16	-2.66524	-3.138	19.6422	33.0388	47.4481	196.268	210.44	228.602	253.342	336.113	292.217
AT2G25220	TCV < Mock < NES	-2.22045e-16	-4.82352	-3.16036	12.7674	6.25058	81.6107	1116.35	955.254	778.571	259.478	298.262	342.169
AT1G33170	TCV < Mock < NES	-2.22045e-16	-4.1666	-3.1694	81.515	76.7929	190.741	2158.95	2122.13	1987.84	1000.22	1244.53	895.8
AT3G01140	TCV < Mock < NES	-2.22045e-16	-4.65969	-3.24634	14.7316	5.35764	26.5709	429.975	331.029	419.103	129.739	189.253	124.047
AT1G64580	TCV < NES < Mock	-2.22045e-16	-2.09836	-3.37053	82.4971	75.007	93.9472	308.584	413.786	354.498	863.466	1018.18	719.304
AT1G75240	TCV < Mock < NES	-2.22045e-16	-4.69709	-3.43963	3.92843	1.78588	45.5501	595.612	410.239	324.681	146.395	286.907	123.214
AT1G68870	TCV < Mock < NES	-2.22045e-16	-5.65111	-3.54855	3.92843	11.6082	17.0813	434.513	689.249	516.839	124.479	105.982	151.52
AT1G63300	TCV < Mock = NES	-2.22045e-16	-3.142	-3.55333	45.177	47.3258	90.1513	566.115	521.37	525.122	526.845	857.694	760.098
AT3G52910	TCV < Mock = NES	-2.22045e-16	-3.9232	-3.7833	3.92843	7.14352	42.7033	285.894	280.192	250.137	197.238	276.309	267.241
AT4G34800	TCV = Mock < NES	-2.22045e-16	-1.58075	-3.85472	0.982109	0.89294	4.74481	11.345	3.54674	4.9696	28.0517	34.8225	33.3011
AT5G41470	TCV < Mock < NES	-2.22045e-16	-5.30308	-4.05315	4.91054	0	0.948961	89.6254	81.5749	61.2918	35.0646	31.0375	31.636
AT1G01200	TCV < Mock < NES	-2.22045e-16	-6.98527	-4.61933	0	0	1.89792	86.2219	76.846	81.1702	7.01292	12.8692	27.4734
AT5G57760	TCV < Mock < NES	-2.22045e-16	-6.69906	-5.81034	1.96422	0	0.948961	79.4149	141.869	84.4833	59.6098	68.888	36.6312
AT4G29030	TCV < Mock < NES	-2.22045e-16	-13.3736	-10.5991	0	0	0	145.216	88.6684	84.4833	9.64276	6.05609	30.8035
AT4G24750	TCV < Mock < NES	0	-2.43239	-1.0002	837.739	617.022	745.884	3420.51	4929.96	3528.42	1476.22	1567.01	1358.68
AT5G04360	TCV < Mock < NES	0	-2.46326	-1.00144	290.704	183.946	212.567	1345.52	1087.67	1356.7	411.132	469.347	495.354
AT5G53490	TCV < Mock < NES	0	-2.53438	-1.00186	1106.84	986.699	1237.45	6150.12	7785.09	5362.2	2019.72	2065.88	2585
AT5G12130	TCV < Mock < NES	0	-1.65433	-1.00244	562.748	550.944	532.367	1732.38	1754.45	1694.64	936.225	1038.62	1322.89
AT3G55030	TCV < Mock = NES	0	-1.11535	-1.0025	341.774	347.354	386.227	772.594	805.109	752.067	721.454	715.376	717.639
AT5G61480	TCV < Mock < NES	0	-1.96656	-1.00302	211.153	229.486	318.851	941.634	943.432	1083.37	362.042	604.852	555.296
AT3G45230	TCV < Mock < NES	0	-2.41685	-1.00394	42.2307	22.3235	70.2231	188.327	273.099	258.419	68.376	87.0563	114.889
AT4G13195	TCV < Mock < NES	0	-2.02316	-1.00543	74.4036	72.8711	81.4512	339.131	276.907	313.764	137.388	141.768	180.05
AT5G20590	TCV < Mock = NES	0	-1.12401	-1.00584	573.551	415.217	548.5	1021.05	1196.43	1133.07	963.4	1086.31	1037.33
AT5G64740	TCV < Mock < NES	0	-2.05813	-1.00641	4484.31	3029.75	5312.29	16957.4	17213.5	19244	7590.61	8457.33	9718.93
AT5G59290	TCV < Mock < NES	0	-1.64812	-1.0068	1096.03	1073.31	1393.08	3326.35	4189.88	3649.35	2216.96	2456.5	2485.09
AT2G20890	TCV < Mock < NES	0	-2.68674	-1.00691	3024.89	3204.76	3024.34	19648.4	21805.3	18129.1	5625.24	5900.15	7071.49
AT3G15480	TCV < Mock < NES	0	-2.27518	-1.00763	570.605	243.773	577.917	1810.66	2735.72	2193.25	898.53	891.002	1009.86
AT5G14060	TCV < Mock < NES	0	-2.30889	-1.00764	1816.9	1698.37	1833.39	8368.07	9573.82	8560.97	3754.54	3433.05	3566.55
AT2G32650	TCV < Mock = NES	0	-1.23823	-1.00827	350.19	309	431.714	860.561	912.354	800.67	761.063	790.63	642.692
AT4G33500	TCV < Mock < NES	0	-2.04393	-1.01083	944.788	818.826	679.456	3494.26	3017.09	3563.21	1600.7	1522.35	1799.92
AT2G31150	TCV < Mock < NES	0	-1.35022	-1.01135	310.346	246.452	300.821	697.717	740.086	748.754	533.858	581.385	613.573
AT2G26930	TCV < Mock < NES	0	-1.96015	-1.01248	524.446	428.611	505.796	1837.89	2001.54	1837.1	929.212	959.89	1053.98
AT4G39960	TCV < Mock < NES	0	-1.72187	-1.01257	1669.58	1665.33	1630.32	5328.74	6220.98	4828.8	3129.51	3367.94	3519.93
AT3G54390	TCV < Mock = NES	0	-1.2966	-1.01342	206.243	227.7	262.862	511.659	522.552	677.523	414.639	470.861	521.162
AT1G11390	TCV < Mock = NES	0	-1.17285	-1.01358	507.75	426.825	524.776	1078.91	1003.73	1207.61	963.4	1044.68	938.259
AT4G03340	TCV < Mock < NES	0	-2.61449	-1.01431	23.5706	20.5376	23.724	156.561	151.327	107.675	49.0904	52.9908	34.9662
AT5G63310	TCV < Mock < NES	0	-2.35008	-1.01476	794.526	734.89	975.532	3794.9	5103.75	3872.98	1710.28	1800.17	1551
AT4G25290	TCV < Mock < NES	0	-2.46805	-1.01836	677.655	849.186	933.778	4466.52	4746.72	4401.41	1563	1598.05	1823.24
AT3G25140	TCV < Mock < NES	0	-1.39134	-1.01861	1549.77	1293.87	1617.03	4123.9	3653.14	3924.33	2726.27	3125.7	3185.25
AT2G44210	TCV < Mock < NES	0	-2.40845	-1.01862	1692.17	2326.11	1624.62	9205.33	8827.83	11925.4	3678.28	3638.95	4115.18
AT5G09350	TCV < Mock < NES	0	-1.94916	-1.01936	175.797	158.943	160.374	629.647	639.595	642.736	322.594	350.534	330.513
AT2G46710	TCV < Mock < NES	0	-2.53153	-1.02041	366.326	184.839	373.891	1508.88	2304.2	1535.61	639.052	714.619	522.827
AT1G50890	TCV < Mock < NES	0	-2.03739	-1.02167	155.173	146.442	139.497	599.016	592.305	619.544	288.406	289.178	318.026
AT3G11620	TCV < Mock < NES	0	-2.1995	-1.02243	153.209	144.656	135.701	664.816	727.081	599.666	263.861	275.552	341.336
AT2G33250	TCV < Mock < NES	0	-1.45114	-1.02269	823.989	843.829	801.872	2351.82	2222.62	2178.34	1637.52	1584.42	1795.76
AT4G22200	TCV < Mock < NES	0	-1.79606	-1.02418	1484.95	2160.02	1186.2	5832.46	5801.28	5143.54	3122.5	3183.23	3519.93
AT5G50150	TCV < Mock < NES	0	-1.89567	-1.02514	216.064	233.95	280.893	914.406	892.595	912.751	392.723	542.02	552.798
AT1G42970	TCV < Mock < NES	0	-2.53134	-1.02527	13894.9	11896.6	12146.7	70485.3	73014.3	75824.6	25550.7	24312.9	27353.5
AT1G67700	TCV < Mock < NES	0	-2.64927	-1.02548	1393.61	1543.89	1434.83	8461.09	10492.4	8476.49	2907.73	2626.07	3366.74
AT4G31050	TCV < Mock = NES	0	-1.11589	-1.02659	89.3719	76.7929	93.9472	164.502	226.991	172.28	173.57	183.197	173.166
AT2G42130	TCV < Mock < NES	0	-2.35373	-1.02677	529.356	493.796	404.257	2402.87	2547.74	2345.65	910.803	915.227	1082.29
AT2G39450	TCV < Mock < NES	0	-2.27555	-1.02789	763.098	601.842	669.967	3448.88	3105.76	3298.16	1384.17	1299.03	1466.08
AT1G75350	TCV < Mock < NES	0	-2.4787	-1.02879	2005.47	1743.91	1789.74	9946.15	12102.6	8826.02	3436.33	3610.19	4255.05
AT4G01800	TCV < Mock = NES	0	-1.22438	-1.02929	3602.37	4877.24	3665.84	9557.02	9278.26	9543.3	8582.06	8367.25	7839.91
AT3G17390	TCV < Mock < NES	0	-2.41538	-1.03224	3755.58	2511.84	7004.28	18139.5	27247.2	25412.9	8004.37	9097.01	10041.9
AT4G22890	TCV < Mock < NES	0	-2.62987	-1.03358	4441.09	4623.65	4134.62	28850.3	26377.1	26473.1	9093.13	7773.75	10153.5
AT3G23300	TCV < Mock < NES	0	-1.91135	-1.03426	1432.9	1212.61	1632.21	5604.43	5402.86	5083.91	2556.21	2795.64	3409.2
AT4G05450	TCV < Mock < NES	0	-1.3654	-1.03517	292.668	304.493	298.923	741.962	887.642	679.179	634.339	643.46	558.626
AT1G67050	TCV < Mock < NES	0	-1.66531	-1.03547	143.388	176.802	250.526	612.63	594.669	602.979	319.088	426.197	424.589
AT2G15820	TCV < Mock < NES	0	-1.46116	-1.036	364.362	416.11	372.942	1055.08	1068.75	1051.9	809.115	834.226	721.801
AT3G09210	TCV < Mock < NES	0	-1.50839	-1.03688	832.828	800.967	706.976	2105.63	2613.94	1939.8	1618.23	1626.06	1558.49
AT1G27480	TCV < Mock < NES	0	-1.72342	-1.03702	703.19	650.953	605.437	2137.4	2188.34	2145.21	1349.11	1264.97	1406.97
AT1G53290	TCV < Mock < NES	0	-1.48471	-1.03789	183.654	125.012	177.456	424.303	523.735	412.477	343.633	332.328	322.188
AT1G62180	TCV < Mock < NES	0	-1.97783	-1.03903	7570.09	6903.32	4389.89	20418.7	24634.4	29249.4	12887.1	12836.6	13037.4
AT4G25870	TCV < Mock < NES	0	-1.6167	-1.03952	170.887	237.522	232.496	631.916	714.076	619.544	384.834	423.926	508.674
AT5G55260	TCV < Mock < NES	0	-1.35052	-1.04101	333.917	291.991	308.412	786.208	880.773	715.623	618.89	676.768	626.893
AT3G45050	TCV < Mock < NES	0	-1.26006	-1.04341	519.535	481.295	507.694	1205.97	1250.82	1156.26	962.523	1030.29	1116.42
AT5G50180	TCV < Mock < NES	0	-1.39691	-1.04396	577.48	567.017	595.948	1521.36	1493.18	1568.74	1043.17	1205.92	1339.54
AT3G02690	TCV < Mock < NES	0	-1.24612	-1.04444	1359.24	1363.52	1018.24	3016.63	2961.52	2895.62	2740.3	2439.09	2536.71
AT4G15110	TCV < Mock < NES	0	-1.82064	-1.04505	1104.87	1063.49	1147.29	3931.04	4004.27	3776.9	2227.48	2224.86	2389.35
AT1G67090	TCV < Mock < NES	0	-2.40057	-1.04535	98793.2	77517.1	86201.4	452557	495583	437953	178130	168885	194772
AT3G55360	TCV < Mock < NES	0	-2.95163	-1.04579	644.263	549.158	780.046	4559.55	5623.94	5083.91	1303.53	1317.96	1452.76
AT2G42210	TCV < Mock < NES	0	-1.42852	-1.04598	1723.6	1377.81	1785.95	4062.64	5103.75	3988.94	3195.26	3319.49	3576.54
AT3G44890	TCV < Mock < NES	0	-2.77101	-1.04677	1212.9	1343.88	1564.84	8929.64	10851.8	8352.25	2593.9	2853.93	3067.03
AT4G29720	TCV < Mock < NES	0	-2.49219	-1.04693	409.539	357.176	433.675	2348.41	2174.15	2231.35	810.869	858.451	810.882
AT1G28110	TCV < Mock < NES	0	-1.86854	-1.04716	161.066	147.335	162.272	617.168	520.188	581.444	255.095	351.253	366.312
AT1G25570	TCV < Mock < NES	0	-2.05862	-1.04734	354.541	375.035	414.696	1551.99	1545.19	1669.79	699.539	739.6	925.771
AT1G11410	TCV < Mock < NES	0	-1.94556	-1.04913	384.987	914.371	635.804	2363.16	2100.85	2990.05	1313.17	1296.76	1394.48
AT2G33310	TCV < Mock < NES	0	-2.14252	-1.05032	318.203	382.178	303.668	1424.93	1544.01	1464.38	661.844	678.282	739.284
AT5G17660	TCV < Mock < NES	0	-2.13632	-1.05079	171.869	200.019	160.374	778.266	859.492	702.371	347.139	354.281	401.278
AT3G02570	TCV < Mock < NES	0	-2.11318	-1.05093	569.623	550.051	692.742	2823.77	2564.29	2453.33	1113.3	1216.52	1425.29
AT1G48500	TCV < Mock < NES	0	-2.5605	-1.05167	15.7137	14.287	49.346	187.192	125.318	155.714	53.4735	46.9347	64.1046
AT5G58900	TCV < Mock < NES	0	-1.58997	-1.05209	164.994	126.798	110.08	374.385	427.973	407.508	279.64	249.814	303.873
AT2G19870	TCV < Mock = NES	0	-1.17423	-1.05256	580.426	548.265	646.243	1242.28	1461.26	1302.04	1311.42	1352.02	1018.18
AT2G45310	TCV < Mock < NES	0	-1.69716	-1.05262	153.209	94.6517	195.486	496.911	458.711	482.052	259.478	300.533	359.652
AT4G39900	TCV < Mock < NES	0	-2.76238	-1.05329	131.603	178.588	302.719	1231.5	1663.42	1263.94	346.264	426.197	499.517
AT1G03160	TCV < Mock = NES	0	-1.26232	-1.05343	1154.96	929.551	1078.02	2501.57	2359.76	2725	2365.11	2134.77	2063.84
AT1G60860	TCV < Mock < NES	0	-1.72826	-1.05378	157.137	91.0799	205.925	526.408	492.996	485.365	310.322	327.786	304.705
AT3G05020	TCV < Mock < NES	0	-1.95066	-1.05387	158.119	208.055	245.781	635.32	935.156	795.137	441.814	447.394	381.298
AT1G74520	TCV < Mock < NES	0	-1.84858	-1.05447	524.446	548.265	555.142	1803.85	2117.4	1941.46	1069.47	1030.29	1281.26
AT4G01950	TCV < Mock < NES	0	-3.16695	-1.05459	721.85	972.412	1334.24	8812.79	9323.19	9064.56	1973.26	2430.01	1887.34
AT3G24660	TCV < Mock < NES	0	-1.48392	-1.05652	131.603	100.009	140.446	297.239	347.58	395.912	236.686	273.281	263.911
AT3G01810	TCV < Mock < NES	0	-3.08258	-1.05971	428.199	264.31	451.706	3165.25	3085.66	3442.28	731.973	728.245	924.938
AT3G49260	TCV < Mock < NES	0	-3.82866	-1.06023	201.332	136.62	237.24	2540.14	2748.72	2884.03	367.302	387.59	444.57
AT5G13650	TCV < Mock < NES	0	-1.86099	-1.06262	8453.99	8321.31	8092.74	30555.5	28502.8	31277	17360.5	16178.8	18403
AT2G47260	TCV < Mock < NES	0	-1.5843	-1.06411	177.762	146.442	215.414	475.355	516.641	626.17	436.554	351.253	340.504
AT2G22420	TCV < Mock < NES	0	-1.93886	-1.06424	101.157	108.939	125.263	450.396	452.8	382.66	205.128	233.917	262.246
AT1G67690	TCV < Mock < NES	0	-1.67103	-1.06471	112.942	102.688	137.599	341.484	433.884	349.529	241.069	250.571	247.261
AT3G19480	TCV < Mock < NES	0	-2.1549	-1.06615	429.181	550.051	473.532	2158.95	2178.88	2131.96	938.854	967.46	1135.57
AT2G23520	TCV < Mock = NES	0	-1.2271	-1.06717	597.122	501.832	559.887	1322.83	1173.97	1386.52	1241.29	1243.01	991.54
AT2G22670	TCV < Mock < NES	0	-2.66108	-1.0675	1176.57	892.047	1348.47	6615.26	8035.72	6962.42	2081.96	2333.11	2746.51
AT2G32400	TCV < Mock < NES	0	-1.84698	-1.06773	338.827	373.249	299.872	1215.05	1035.65	1389.83	603.111	763.824	754.27
AT2G18940	TCV < Mock < NES	0	-2.24282	-1.06784	596.14	478.616	561.785	2641.11	2391.68	2713.4	1094.89	1154.44	1181.36
AT2G28100	TCV < Mock = NES	0	-1.09648	-1.06969	429.269	370.559	418.634	828.804	925.089	851.598	775.793	846.823	934.945
AT5G38520	TCV < Mock < NES	0	-2.91432	-1.07003	683.548	588.448	546.602	4430.22	4851.94	4427.92	1206.22	1182.45	1429.45
AT5G40950	TCV < Mock < NES	0	-2.5517	-1.0712	2406.17	3000.28	2564.09	15294.2	17847.2	13591.9	5278.1	5569.33	5900.12
AT5G22370	TCV < Mock = NES	0	-1.16441	-1.07331	291.686	253.595	315.055	597.881	725.899	604.635	618.013	623.777	568.616
AT4G20960	TCV < Mock < NES	0	-1.98644	-1.07466	286.776	346.461	298.923	1218.45	1332.39	1143.01	578.566	706.292	678.51
AT4G13070	TCV < Mock = NES	0	-1.08647	-1.07485	141.424	170.552	154.681	331.274	341.669	318.055	363.795	343.683	275.567
AT2G48070	TCV < Mock = NES	0	-1.01664	-1.07663	988.001	909.013	827.494	1734.65	1947.16	1830.47	1920.66	1834.24	1991.41
AT5G44520	TCV < Mock < NES	0	-2.05753	-1.07707	477.305	411.645	425.135	1900.29	1787.56	1782.43	905.543	889.488	977.387
AT1G68060	TCV < Mock < NES	0	-2.08069	-1.07816	384.004	282.169	478.276	1599.64	1705.98	1535.61	706.552	761.553	948.249
AT3G53130	TCV < Mock < NES	0	-2.51853	-1.07827	404.629	426.825	390.972	2345.01	2494.54	2165.09	761.778	839.526	979.885
AT3G15190	TCV < Mock < NES	0	-2.2564	-1.07944	1634.23	1395.67	1597.1	6855.78	8427.05	6824.92	3250.49	3284.67	3242.69
AT5G05240	TCV < Mock < NES	0	-2.19058	-1.08097	28.4811	17.8588	27.5199	100.97	133.594	102.705	44.7074	66.617	44.9565
AT3G47750	TCV < Mock < NES	0	-3.48005	-1.08475	121.781	125.905	99.6409	1370.47	1084.12	1421.31	248.959	218.019	269.739
AT5G54630	TCV < Mock < NES	0	-2.35652	-1.08483	191.511	102.688	167.966	766.921	962.348	637.766	285.776	398.188	296.38
AT5G42670	TCV < Mock < NES	0	-1.89908	-1.08545	222.939	217.877	202.129	760.114	950.525	687.462	518.956	504.927	340.504
AT2G36250	TCV < Mock = NES	0	-1.18607	-1.08597	1032.2	988.485	1098.9	2386.99	2102.03	2609.04	2159.98	2103.73	2358.55
AT3G53100	TCV < Mock < NES	0	-2.09408	-1.08618	202.314	195.554	226.802	821.377	936.338	909.438	414.639	417.113	494.521
ATCG00120	TCV < Mock < NES	0	-3.41427	-1.08778	82.4971	91.0799	93.9472	893.985	977.717	980.669	174.446	162.757	231.443
AT3G48425	TCV < Mock < NES	0	-1.40155	-1.09002	79.5508	128.583	84.4576	277.952	264.823	230.258	196.362	230.888	195.644
AT1G72640	TCV < Mock < NES	0	-2.11884	-1.09346	543.106	433.969	508.643	2181.64	2429.51	1842.07	1062.46	1018.94	1088.95
AT1G78040	TCV < Mock < NES	0	-2.40841	-1.09359	4652.25	3107.43	5804.8	21511.2	28978	21523.4	8625.89	9638.27	10683
AT4G18030	TCV < Mock < NES	0	-2.00089	-1.09474	2485.72	1825.17	3437.14	9389.11	11273.9	10348.4	4623.27	5488.33	6436.27
AT5G13360	TCV < Mock < NES	0	-2.10343	-1.09505	279.901	374.425	360.605	1449.89	1442.34	1469.35	778.434	695.369	694.328
AT3G09150	TCV < Mock = NES	0	-1.00628	-1.09661	363.38	392.001	320.749	676.161	756.637	728.875	737.233	836.498	727.629
AT4G26900	TCV < Mock < NES	0	-1.33699	-1.09693	752.295	581.304	728.802	1691.54	1787.56	1731.08	1567.39	1525.38	1318.72
AT5G45280	TCV < Mock < NES	0	-2.66875	-1.09706	135.531	95.5446	538.061	1662.04	1597.21	1631.69	518.079	525.366	601.917
AT1G11720	TCV < Mock < NES	0	-1.9029	-1.09719	900.594	1020.63	856.912	3712.08	2862.22	3815	1858.42	1820.61	2264.47
AT3G62910	TCV < Mock < NES	0	-2.1526	-1.09948	393.826	336.639	374.84	1632.54	1691.79	1590.27	763.531	803.189	801.724
AT5G49460	TCV < Mock < NES	0	-2.05249	-1.10091	556.856	442.898	763.914	2227.02	2770	2319.15	1154.5	1267.24	1361.18
AT3G62530	TCV < Mock < NES	0	-1.7976	-1.1021	1928.86	1846.6	1985.1	6064.98	6929.14	7032.01	4942.35	4479.99	2943.68
AT1G49890	TCV < Mock < NES	0	-1.76542	-1.10266	364.362	330.388	361.554	1185.55	1237.81	1167.86	730.22	762.31	775.916
AT1G72180	TCV < Mock = NES	0	-1.27211	-1.10306	1095.05	855.437	1661.63	3150.5	3037.19	2536.15	2422.96	2756.28	2580
AT3G56000	TCV < Mock < NES	0	-2.26715	-1.1039	20.6243	10.7153	25.622	90.7599	104.038	79.5137	42.0775	45.4207	34.9662
AT1G20650	TCV < Mock < NES	0	-2.69855	-1.10522	529.356	403.993	467.838	2962.18	2915.12	3218.65	999.341	997.741	1017.35
AT2G40490	TCV < Mock < NES	0	-2.32194	-1.10612	1656.82	1571.57	1720.47	8152.51	9550.18	7041.93	3051.5	3906.18	3695.59
AT2G40540	TCV < Mock < NES	0	-2.32018	-1.10821	606.943	615.236	729.751	3398.96	3102.21	3246.81	1457.81	1373.98	1376.17
AT2G21280	TCV < Mock < NES	0	-1.66601	-1.10866	818.096	718.817	758.22	2517.45	2498.08	2267.8	1529.69	1597.29	1822.4
AT1G21350	TCV < Mock < NES	0	-1.8968	-1.1123	495.965	384.857	432.726	1515.69	1866.77	1509.1	926.582	934.152	979.052
AT2G33450	TCV < Mock < NES	0	-3.10108	-1.1125	799.436	695.601	835.052	6034.4	8453.05	5506.32	1482.36	1685.11	1870.69
AT3G46320	TCV < Mock < NES	0	-2.02591	-1.11432	103.233	181.432	101.591	465.846	573.501	533.77	267.204	285.344	283.705
AT5G59000	TCV < Mock < NES	0	-2.69464	-1.1145	31.4275	38.3964	44.6012	220.093	295.561	225.289	71.8824	72.6731	103.233
AT1G79500	TCV < Mock < NES	0	-1.57935	-1.11491	137.495	119.654	195.486	448.127	445.707	458.86	274.38	308.861	397.116
AT3G25805	TCV < Mock < NES	0	-2.19764	-1.11525	218.028	256.274	233.444	1078.91	1231.9	935.942	461.976	486.001	585.267
AT1G29070	TCV < Mock < NES	0	-1.65455	-1.11537	1715.74	1384.06	1786.89	4682.08	5794.18	4908.31	3683.54	3628.36	3275.16
AT1G70070	TCV < Mock = NES	0	-1.1614	-1.1156	805.329	680.421	811.362	1658.64	1670.51	1808.94	1720.79	1620	1636.75
AT4G04870	TCV < Mock < NES	0	-1.59957	-1.11631	97.2287	164.301	118.62	358.502	404.328	389.286	298.926	309.618	215.625
AT1G26260	TCV < Mock = NES	0	-1.24325	-1.11695	121.781	103.581	101.539	274.549	229.356	270.015	198.115	269.496	241.433
AT2G35410	TCV < Mock < NES	0	-2.52009	-1.11782	1013.54	754.535	927.135	5082.56	5600.3	4777.45	1882.09	1869.06	2097.97
AT2G24010	TCV = NES < Mock	0	-2.66885	-1.1181	12.7674	3.57176	7.59169	55.5905	43.7431	53.0091	13.1492	19.6823	19.1481
AT5G46290	TCV < Mock < NES	0	-2.40821	-1.11816	1021.39	917.05	1186.2	5000.87	6203.24	5382.08	2020.6	2152.94	2609.14
AT2G34170	TCV < Mock < NES	0	-2.9903	-1.11819	191.511	309.85	311.259	1843.56	2389.32	2224.73	579.442	576.843	607.745
AT3G50780	TCV < Mock < NES	0	-1.66046	-1.11942	333.917	305.386	414.696	1066.21	1098.13	1167.61	704.798	775.937	809.217
AT5G03170	TCV < Mock < NES	0	-2.98784	-1.12007	27.499	46.4329	99.6409	395.94	502.454	478.739	126.233	137.019	114.056
AT3G55800	TCV < Mock < NES	0	-3.22995	-1.1219	5410.44	5765.72	5594.13	51094.4	52527.2	53723.1	11975.4	10804.8	13717.6
AT4G18390	TCV < Mock = NES	0	-1.16795	-1.12269	1094.07	962.59	1103.64	2434.64	2077.21	2589.16	2242.38	2432.28	2207.03
AT3G29290	TCV < Mock < NES	0	-2.02332	-1.12286	682.565	625.058	550.398	2595.73	2540.65	2416.88	1383.3	1353.54	1309.57
AT1G72500	TCV < Mock < NES	0	-1.90679	-1.12563	547.034	296.456	475.43	1519.09	1781.64	1644.94	895.024	987.143	995.703
AT1G47230	TCV < Mock = NES	0	-1.28064	-1.12587	203.296	205.376	260.015	545.694	535.557	543.343	476.002	541.263	442.072
AT2G46590	TCV < Mock < NES	0	-1.72494	-1.12632	160.084	113.403	176.507	529.811	482.356	475.425	281.393	333.842	367.145
AT5G54670	TCV < Mock < NES	0	-3.30152	-1.13027	54.9981	70.5423	70.2231	719.272	598.216	612.918	106.947	147.617	173.998
AT1G75690	TCV < Mock < NES	0	-3.67049	-1.13071	587.301	573.268	596.897	6961.29	8623.3	6793.45	1232.52	1235.44	1380.33
AT4G15780	TCV < Mock < NES	0	-1.81206	-1.13071	585.337	504.511	601.641	1873.06	2259.27	1807.28	1225.51	1219.55	1258.78
AT5G47840	TCV < Mock < NES	0	-1.90546	-1.13103	1532.09	1355.48	1382.64	5385.47	5813.1	4798.98	2996.27	2972.78	3383.39
AT3G57060	TCV < Mock = NES	0	-1.1326	-1.13181	124.728	99.1164	141.395	281.356	232.902	286.581	240.192	292.963	267.241
AT1G44920	TCV < Mock < NES	0	-1.93261	-1.13211	836.756	857.223	767.71	2939.49	3532.55	2925.44	1822.48	1720.69	1852.37
AT4G17190	TCV < Mock < NES	0	-1.62289	-1.1336	365.344	244.666	356.809	924.617	1125.5	927.66	642.559	716.133	762.595
AT2G40760	TCV < Mock < NES	0	-1.44057	-1.13406	282.847	240.201	269.505	697.717	782.646	670.897	618.013	625.291	496.186
AT1G64510	TCV < Mock < NES	0	-3.20126	-1.13422	1270.85	789.359	1216.57	9128.18	12356.8	8653.74	2177.51	2329.32	2685.73
AT4G02060	TCV < Mock < NES	0	-2.71652	-1.1343	60.8907	156.265	108.182	673.892	775.553	689.118	220.907	212.72	280.562
AT5G05160	TCV < Mock < NES	0	-1.61579	-1.13505	96.2466	107.153	128.11	332.408	302.655	381.003	225.29	258.898	243.931
AT3G56270	TCV < Mock < NES	0	-1.43051	-1.13577	213.118	258.06	247.679	620.571	664.422	652.675	554.897	476.917	547.803
AT5G09995	TCV < Mock < NES	0	-2.10599	-1.13648	133.567	146.442	166.068	574.057	740.086	606.292	340.127	296.748	343.834
AT3G27180	TCV < Mock = NES	0	-1.06635	-1.13856	204.279	257.167	255.271	481.287	527.655	491.991	575.936	545.805	456.225
AT5G36700	TCV < Mock < NES	0	-2.6549	-1.13951	2445.32	2696.84	2400.02	16625	14933.4	15942.8	5149.55	5254.77	6211.57
AT5G47770	TCV < Mock = NES	0	-1.45037	-1.13962	1146.12	1132.25	1256.42	2862.34	3631.86	3165.64	2230.11	2520.85	3037.06
AT3G12920	TCV < Mock < NES	0	-1.789	-1.13997	561.766	571.482	541.857	2124.92	1846.67	1817.22	1122.94	1215.76	1352.86
AT4G19120	TCV < Mock < NES	0	-2.90083	-1.14093	280.883	284.848	472.583	2258.79	2585.57	2910.53	613.63	757.011	919.11
AT5G06670	TCV < Mock < NES	0	-1.60777	-1.14123	168.923	112.51	168.915	446.993	430.337	495.304	314.705	348.982	329.681
AT5G06700	TCV < Mock < NES	0	-2.91734	-1.14127	740.51	476.83	1009.69	5884.65	5975.07	4964.63	1424.5	1640.44	1847.38
AT3G25030	TCV < Mock < NES	0	-3.10627	-1.1422	72.676	58.9341	97.743	647.799	654.964	672.553	149.901	166.542	189.816
AT3G01480	TCV < Mock < NES	0	-3.2359	-1.14379	937.914	1017.06	1004.95	8952.33	10175.6	8758.1	2040.76	2205.93	2293.61
AT5G38060	TCV < Mock < NES	0	-2.1663	-1.14459	79.5508	79.4717	89.2024	367.578	430.337	316.398	195.485	180.169	173.166
AT1G27880	TCV < Mock < NES	0	-1.61034	-1.14578	41.2486	40.1823	36.0605	123.66	115.86	119.271	64.8695	96.8975	98.2383
AT3G09820	TCV < Mock < NES	0	-2.25667	-1.14586	1262.99	1351.91	1986.18	6750.27	7801.64	7436.18	2818.32	3371.73	3991.14
AT1G60710	TCV < Mock < NES	0	-1.77858	-1.14613	1401.47	1580.5	1408.26	4602.66	5437.15	5022.61	3083.05	3348.26	3285.15
AT2G20835	TCV = NES < Mock	0	-3.47614	-1.14645	4.91054	13.3941	10.4386	103.239	99.3086	117.614	22.792	15.8972	24.9758
AT1G77460	TCV < Mock < NES	0	-1.71054	-1.14706	346.684	314.315	562.734	1263.83	1160.96	1580.33	794.213	965.189	950.746
AT1G17360	TCV < Mock < NES	0	-2.18719	-1.14761	1967.16	1605.51	1899.82	8631.27	8164.59	8126.96	3746.65	4417.16	3960.33
AT3G08920	TCV < Mock < NES	0	-2.89719	-1.14845	125.71	72.3282	169.864	876.968	928.063	935.942	284.9	288.421	242.266
AT2G21590	TCV < Mock < NES	0	-2.21625	-1.14888	56.9623	109.832	125.263	492.373	362.949	501.93	191.979	230.888	224.782
AT3G23070	TCV < Mock < NES	0	-2.1576	-1.15009	647.21	497.368	557.989	2518.59	2649.41	2428.48	1186.94	1294.49	1297.08
AT3G54080	TCV < Mock = NES	0	-1.14632	-1.15033	393.826	296.456	473.532	780.535	954.072	841.52	817.005	887.974	878.317
AT4G14190	TCV < Mock = NES	0	-1.22644	-1.15373	309.364	268.717	239.11	633.027	725.899	553.256	678.489	617.721	521.978
AT1G12010	TCV < Mock < NES	0	-2.91087	-1.15394	17.678	23.2164	10.4386	95.2979	141.869	149.088	49.0904	39.3646	25.8084
AT4G16750	TCV < Mock < NES	0	-3.0218	-1.15515	57.9444	107.153	86.3555	864.488	631.319	546.656	182.336	177.898	199.807
AT2G05210	TCV < Mock < NES	0	-2.22769	-1.15536	164.994	106.26	186.945	710.196	760.184	675.866	301.555	344.44	374.637
AT5G63700	TCV < Mock < NES	0	-2.17738	-1.15551	420.342	358.962	401.411	1612.12	1850.21	1878.51	981.809	784.264	864.164
AT4G39620	TCV < Mock = NES	0	-1.29187	-1.15582	262.223	350.926	303.668	717.003	812.203	715.623	570.676	648.759	823.37
AT2G24170	TCV < Mock < NES	0	-2.40862	-1.15585	71.6939	67.8635	128.11	475.355	429.155	516.839	149.025	205.15	242.266
AT3G22104	TCV < Mock < NES	0	-2.33858	-1.15594	498.911	417.003	471.634	2410.81	2190.7	2416.88	942.361	1118.86	1030.67
AT5G54280	TCV < Mock < NES	0	-1.90921	-1.15623	440.967	391.108	538.061	1774.36	1405.69	1966.31	959.893	1134.76	959.072
AT3G58620	TCV < Mock < NES	0	-2.52369	-1.15625	101.157	53.5764	149.936	500.314	604.127	647.705	231.426	236.188	211.462
AT2G33180	TCV < Mock < NES	0	-2.68411	-1.15841	230.796	250.023	263.811	1456.7	2045.28	1283.81	496.164	588.198	577.774
AT1G64770	TCV < Mock < NES	0	-2.56276	-1.15991	1331.74	1250.12	1126.42	7434.37	6844.02	7631.66	2664.91	2480.73	3140.29
AT3G50530	TCV < Mock < NES	0	-2.05752	-1.16001	502.84	392.001	506.745	1765.28	2198.98	1870.23	927.458	1109.78	1094.77
AT4G30520	TCV < Mock < NES	0	-2.33221	-1.16095	102.139	108.939	125.263	613.764	528.464	551.626	204.251	249.814	298.045
AT3G08880	TCV < Mock < NES	0	-1.89443	-1.16247	65.8013	65.1846	90.1513	283.625	305.019	233.571	140.258	182.44	172.333
AT2G23340	TCV < Mock < NES	0	-1.75083	-1.16452	153.209	156.265	233.444	707.927	562.749	556.596	364.672	385.319	467.048
AT4G33000	TCV < Mock < NES	0	-2.39664	-1.16515	189.547	138.406	194.537	886.044	974.17	891.216	356.782	351.253	463.718
AT4G35550	TCV < Mock = NES	0	-1.16728	-1.16621	414.45	372.356	461.195	966.593	951.708	884.59	779.311	950.049	1071.46
AT5G63410	TCV < Mock < NES	0	-1.87223	-1.16673	833.81	798.289	885.381	3054.07	2910.69	3251.78	1600.7	1885.72	2165.4
AT2G36470	TCV < Mock = NES	0	-1.2085	-1.16686	96.2466	84.8293	110.08	235.976	203.346	233.571	241.069	202.879	209.797
AT1G19440	TCV < Mock < NES	0	-1.63987	-1.16843	380.076	520.584	493.46	1167.4	1635.05	1542.23	1051.94	973.517	1108.09
AT5G10910	TCV < Mock = NES	0	-1.18279	-1.16953	308.382	324.137	287.535	627.378	816.932	644.392	699.539	729.002	641.046
AT5G24760	TCV < Mock < NES	0	-1.84225	-1.17031	226.867	208.948	223.006	787.342	925.698	649.362	394.477	523.852	564.454
AT1G58520	TCV < Mock < NES	0	-2.91002	-1.1724	1749.14	2355.58	1351.32	14359.4	10740.7	15909.4	3859.73	3365.67	5071.76
AT4G17880	TCV < Mock < NES	0	-1.53179	-1.17502	2167.51	2460.05	2059.25	6303.28	5848.57	7182.74	4908.17	4837.3	5353.15
AT1G56210	TCV < Mock < NES	0	-2.93139	-1.17542	40.2664	18.7517	37.0095	234.841	290.832	207.067	63.1163	77.2152	76.5925
AT3G48200	TCV < Mock < NES	0	-2.01111	-1.17602	1582.18	1580.5	1688.2	6585.77	5915.96	7051.87	3425.81	3800.2	3734.72
AT3G16010	TCV < Mock = NES	0	-1.36602	-1.17663	133.567	155.372	166.068	387.999	397.234	387.629	362.919	370.936	294.715
AT3G13740	TCV < Mock < NES	0	-1.47719	-1.17789	488.108	421.468	457.399	1322.83	1338.3	1144.67	1075.61	1043.92	973.225
AT5G15070	TCV < Mock < NES	0	-1.9316	-1.17846	42.2425	33.9317	84.4576	190.596	182.066	240.198	115.713	110.524	137.367
AT1G05210	TCV < Mock < NES	0	-2.6374	-1.18	9.82109	29.467	28.4688	128.198	156.056	137.492	40.3243	49.9627	63.2721
AT5G13290	TCV < Mock < NES	0	-2.39449	-1.18142	133.567	135.727	145.191	736.29	693.978	749.189	293.666	355.038	291.385
AT3G21110	TCV < Mock < NES	0	-1.96996	-1.1839	271.062	163.408	263.811	828.184	1017.91	889.559	653.078	566.244	367.145
AT3G26070	TCV < Mock < NES	0	-1.6778	-1.18406	2360.99	2408.26	1789.74	7053.18	6969.34	6962.42	5114.17	4689.69	5099.23
AT3G48730	TCV < Mock < NES	0	-2.35618	-1.18445	1130.41	1196.54	1264.97	5709.93	7063.92	5617.31	2375.63	2843.33	2944.65
AT1G72610	TCV < Mock < NES	0	-3.10381	-1.18489	7809.73	3741.42	9843.58	48726.7	76840	58361.4	14993.6	14855.6	18791
AT1G73210	TCV < Mock < NES	0	-2.8945	-1.1849	20.6243	22.3235	32.2647	221.227	205.711	132.523	38.5711	57.5329	74.9275
AT1G23980	TCV < Mock = NES	0	-1.26267	-1.18623	102.139	75.8999	99.6409	223.496	234.085	208.723	204.251	227.86	199.807
AT2G36490	TCV < Mock < NES	0	-1.57296	-1.18706	1262.01	1405.49	1480.38	4110.29	3495.9	4734.38	2941.04	3017.45	3485.79
AT1G29840	TCV < Mock < NES	0	-2.20253	-1.18738	97.2287	58.0411	87.3044	357.367	427.973	331.307	171.816	190.01	190.649
AT5G56850	TCV < Mock < NES	0	-3.11347	-1.18816	1022.37	867.938	994.511	8101.46	8868.02	7997.75	1876.83	2141.59	2555.03
AT2G05990	TCV < Mock < NES	0	-2.72538	-1.18883	553.909	392.001	713.619	3064.28	4506.72	3404.18	1199.21	1336.88	1247.13
AT3G61550	TCV < Mock < NES	0	-2.74827	-1.18913	117.853	60.7199	141.395	587.671	775.553	786.854	292.789	227.86	208.964
ATCG00480	TCV < Mock < NES	0	-3.67184	-1.19155	120.799	156.265	98.692	1551.99	1439.97	1797.34	268.244	252.842	337.174
AT5G57800	TCV < Mock < NES	0	-2.6608	-1.19216	984.073	667.026	1247.88	5587.41	6891.31	5854.19	2138.94	2292.23	2192.88
AT3G54400	TCV < Mock < NES	0	-3.59036	-1.19229	158.119	137.513	399.513	2106.76	3241.72	3024.83	341.88	697.207	549.468
AT5G36790	TCV < Mock < NES	0	-2.71561	-1.193	2589.95	2883.14	2684.52	18406.1	16685.7	18493.2	5622.29	6028.48	6999.81
AT2G22080	TCV < Mock = NES	0	-1.51643	-1.19556	470.43	492.01	282.79	1118.62	1163.33	1280.5	1144.86	862.993	844.183
AT3G61870	TCV < Mock < NES	0	-2.59341	-1.19594	1591.02	1901.07	1747.04	10778.9	10505.4	10335.1	3445.97	3673.02	4883.61
AT5G62580	TCV < Mock < NES	0	-2.54977	-1.19719	72.676	172.337	184.098	863.354	864.221	785.198	285.776	320.216	377.968
AT5G06710	TCV < Mock < NES	0	-2.84111	-1.19883	114.907	105.367	97.743	898.523	704.618	675.866	232.303	243.001	254.753
AT5G64480	TCV < Mock < NES	0	-2.16299	-1.19974	234.724	213.413	208.771	917.81	1222.44	801.763	476.878	511.74	520.33
AT2G01070	TCV < Mock = NES	0	-1.0065	-1.20314	460.609	418.789	529.52	926.886	985.993	917.72	980.055	1082.53	1181.36
AT2G17033	TCV < Mock = NES	0	-1.2614	-1.20323	690.422	842.936	756.322	1988.78	1928.24	1572.05	1721.67	1863.76	1686.7
AT4G35300	TCV < Mock = NES	0	-1.04681	-1.20359	957.556	761.678	1042.91	1791.37	1653.96	2261.17	2055.66	2052.26	2253.65
AT2G18710	TCV < Mock < NES	0	-1.77882	-1.20455	1494.77	1228.69	1334.24	4610.6	4781	4532.28	3193.51	3080.28	3077.85
AT3G17210	TCV < Mock < NES	0	-1.97043	-1.20531	810.24	620.594	774.352	2815.83	3084.48	2741.57	1634.01	1726.74	1724.16
AT2G33800	TCV < Mock < NES	0	-2.65804	-1.20554	1872.88	1745.7	2089.61	11440.3	13612.4	10976.2	4114.83	4389.15	4660.49
AT5G45520	TCV < Mock < NES	0	-2.85999	-1.2056	35.3559	38.3964	25.622	257.531	213.986	250.137	63.9929	79.4862	85.7503
AT4G21280	TCV < Mock < NES	0	-3.45015	-1.20835	3623	3874.47	4378.51	41478.4	49646	38673.5	8707.41	8441.43	10293.4
AT5G42710	TCV < Mock < NES	0	-2.3276	-1.21	20.6243	13.3941	40.8053	142.947	113.496	119.271	51.7203	76.4581	44.9565
AT1G14430	TCV < Mock < NES	0	-4.43326	-1.21151	11.7853	2.67882	29.4178	297.239	358.22	293.207	33.3114	32.5515	35.7987
AT2G25830	TCV < Mock < NES	0	-2.38077	-1.21155	598.104	661.669	574.122	3064.28	3579.84	2907.22	1257.94	1331.58	1657.56
AT2G46820	TCV < Mock < NES	0	-3.3385	-1.21171	5116.79	5294.24	4614.8	50892.5	51367.4	49734.1	11513.5	9983.47	13304.6
AT5G14460	TCV < Mock < NES	0	-1.69784	-1.21244	801.401	642.024	673.762	2203.2	2472.08	2193.25	1637.52	1684.35	1584.3
AT2G20635	TCV < Mock < NES	0	-2.04282	-1.21365	21.6064	20.5376	40.8053	137.274	105.22	99.3921	60.4864	62.8319	69.0998
AT4G13930	TCV < Mock < NES	0	-2.6317	-1.21367	2757.76	1702.84	3084.12	13891.9	16649.6	16217.5	5079.11	5529.21	6890
AT3G57220	TCV < Mock < NES	0	-1.65809	-1.21499	251.42	200.019	284.688	698.851	769.642	854.772	568.923	648.759	491.191
AT3G12685	TCV < Mock < NES	0	-3.24401	-1.2172	92.3182	96.4376	74.9679	800.956	920.969	776.915	184.089	188.496	240.6
AT1G75710	TCV < Mock < NES	0	-2.34762	-1.21805	81.515	37.5035	241.036	546.829	593.487	692.432	252.465	276.309	308.868
AT3G11945	TCV < Mock < NES	0	-2.19557	-1.22127	505.786	703.637	613.029	2948.56	2739.26	2660.39	1251.81	1299.79	1697.52
AT5G67280	TCV < Mock < NES	0	-2.53538	-1.22255	237.67	112.51	267.607	1209.38	990.722	1381.55	444.444	535.207	462.053
AT4G28220	TCV < Mock < NES	0	-1.86104	-1.22295	261.241	301.814	307.463	1057.35	1049.83	1055.21	657.461	650.273	724.299
AT5G63780	TCV < Mock < NES	0	-2.41072	-1.22436	262.223	283.955	241.036	1465.77	1378.5	1341.79	527.722	579.871	731.792
AT4G16390	TCV < NES < Mock	0	-1.02017	-1.22503	1034.16	1162.61	1246.94	2288.28	2436.61	2259.51	2631.6	2791.86	2626.62
AT4G33220	TCV < Mock < NES	0	-2.65942	-1.22519	445.877	50.0047	1183.35	2793.14	3863.58	3952.49	1396.45	1199.86	1329.55
AT1G45230	TCV < Mock = NES	0	-1.07614	-1.2263	998.804	1226.9	1031.52	2320.05	2501.63	2045.82	2553.58	2573.84	2493.42
AT1G35680	TCV < Mock < NES	0	-3.06479	-1.22701	1465.31	1316.19	1646.45	11713.7	14397.4	10939.8	3175.98	3553.41	3635.65
AT1G52260	TCV < Mock = NES	0	-1.02472	-1.22728	160.084	146.442	151.834	319.929	297.926	314.742	372.561	370.936	329.681
AT3G28007	TCV < Mock < NES	0	-2.35652	-1.22747	45.177	87.5082	25.622	267.742	256.547	286.581	100.811	115.066	154.85
AT4G30825	TCV < Mock < NES	0	-2.26771	-1.22845	499.893	458.078	462.144	2331.4	2262.82	2244.6	1030.02	1045.43	1252.12
AT1G80870	TCV < Mock < NES	0	-1.91922	-1.23064	123.746	143.763	168.915	493.507	550.926	606.292	334.867	350.496	338.839
AT3G15115	TCV < Mock < NES	0	-1.8141	-1.23064	180.708	278.597	172.711	777.132	650.235	795.137	529.475	479.188	474.541
AT4G17600	TCV < Mock < NES	0	-3.35521	-1.23091	1054.78	908.12	1053.35	10095.9	12054.2	8716.69	2131.93	2270.28	2677.41
AT3G49250	TCV < Mock < NES	0	-2.11241	-1.23235	104.104	66.0776	145.308	455.746	469.176	439.391	221.032	236.569	283.679
AT3G21560	TCV < Mock < NES	0	-2.16242	-1.23271	1619.5	813.469	1767.91	6558.54	5089.57	7157.89	3168.09	2870.59	3833.79
AT3G09050	TCV < Mock < NES	0	-1.98126	-1.23348	324.096	317.887	321.698	1333.04	1398.6	1073.43	666.227	729.759	869.991
AT5G18700	TCV < Mock < NES	0	-2.84123	-1.23398	79.5508	107.106	153.732	720.407	731.81	987.295	206.881	289.935	303.869
AT5G16620	TCV < Mock < NES	0	-1.52006	-1.23438	1631.28	1751.06	1643.6	4393.92	5292.91	4727.75	4178.82	4061.37	3584.86
AT5G13520	TCV < Mock < NES	0	-2.32368	-1.23584	62.8549	70.5423	116.722	378.923	465.805	407.508	177.953	209.692	201.472
AT1G27130	TCV < Mock < NES	0	-2.56694	-1.23599	353.559	258.953	457.399	2094.29	2052.38	2193.25	876.615	850.124	793.399
AT3G60900	TCV < Mock < NES	0	-4.02132	-1.23599	2.94633	0	12.3365	105.508	68.5702	74.5441	12.2726	3.78506	19.9807
AT3G26780	TCV < Mock = NES	0	-1.24315	-1.23767	928.093	853.651	1101.74	2079.54	2600.94	2145.21	2166.99	2397.45	2235.34
AT1G01970	TCV < Mock < NES	0	-2.55079	-1.2396	376.148	325.03	372.942	2028.48	2320.75	1944.77	816.128	806.974	913.283
AT1G10780	TCV < Mock < NES	0	-2.16275	-1.24093	19.6422	18.7517	19.9282	91.8944	98.1264	71.231	44.7074	50.7198	42.4589
AT2G19280	TCV < Mock = NES	0	-1.07439	-1.24199	286.776	301.814	317.902	629.647	576.936	702.371	753.012	793.348	597.755
AT1G34430	TCV < Mock < NES	0	-2.46474	-1.24538	686.494	450.042	639.6	2996.21	3575.11	3233.56	1417.49	1373.98	1419.46
AT2G21790	TCV < Mock < NES	0	-1.92365	-1.24618	327.042	513.441	465.94	1623.47	1684.7	1648.25	1063.33	1116.59	919.11
AT5G05180	TCV < Mock < NES	0	-2.24219	-1.24783	62.8549	44.647	84.4576	262.069	346.398	299.833	152.531	180.169	123.214
AT2G25870	TCV < Mock = NES	0	-1.12431	-1.24886	1043	975.091	1041.96	2183.91	2412.96	2073.98	2414.2	2650.3	2207.86
AT5G47610	TCV < Mock = NES	0	-1.62371	-1.2502	593.194	574.161	356.809	1465.77	1892.77	1338.48	1321.94	1075.71	1227.98
AT5G26910	TCV < Mock = NES	0	-1.22144	-1.25044	532.303	399.144	606.386	1158.32	1286.28	1141.35	1155.38	1243.77	1259.61
AT2G17660	TCV < Mock < NES	0	-2.09648	-1.25093	30.4454	35.7176	20.8771	144.081	128.865	99.3921	72.759	79.4862	54.9468
AT2G31320	TCV < Mock < NES	0	-2.03619	-1.25545	119.817	113.403	147.089	496.911	513.094	549.97	310.322	342.926	254.753
AT2G27810	TCV < Mock < NES	0	-2.28722	-1.25624	319.185	198.233	425.135	1362.53	1664.6	1573.71	702.168	842.554	706.816
AT3G62060	TCV < Mock < NES	0	-2.04478	-1.25717	20.6243	30.36	47.4481	131.602	137.14	137.492	69.2526	79.4862	86.5829
AT2G37560	TCV < Mock < NES	0	-3.04957	-1.25854	9.82109	14.287	16.1323	108.912	113.496	110.988	32.4347	27.2524	36.6312
AT4G11080	TCV < Mock < NES	0	-1.90974	-1.25942	74.6402	39.3608	58.9039	217.824	219.898	212.036	135.875	166.542	111.559
AT3G06035	TCV < Mock < NES	0	-3.05716	-1.2607	52.0518	230.379	157.528	1233.2	1155.05	1273.88	263.861	330.814	459.555
AT5G65920	TCV < Mock = NES	0	-1.47059	-1.2614	539.178	339.317	503.898	1252.49	1516.82	1061.84	1137.85	1193.81	982.383
AT1G54385	TCV < Mock < NES	0	-3.10952	-1.2619	18.6601	33.9317	38.9074	230.303	306.202	253.45	53.4735	80.2432	85.7503
AT5G65810	TCV < Mock < NES	0	-2.78878	-1.26223	152.227	175.909	237.24	1346.65	1417.51	1143.01	401.49	419.384	535.315
AT3G61970	TCV < Mock = NES	0	-1.26702	-1.26231	228.831	226.807	203.078	540.022	520.188	525.122	464.606	567.758	547.803
AT3G62110	TCV < Mock < NES	0	-1.74426	-1.26299	463.555	742.033	560.836	1714.23	2305.38	1898.39	1261.45	1352.78	1625.09
AT4G12730	TCV < Mock < NES	0	-3.58772	-1.26446	109.014	137.513	984.073	4079.66	5339.02	5377.11	855.576	931.124	1169.7
AT1G44000	TCV < Mock < NES	0	-2.64928	-1.2666	1678.42	1756.41	1730.91	10615.5	12494	9298.13	4050.84	4123.44	4254.22
AT2G33290	TCV < Mock = NES	0	-1.00501	-1.26686	161.066	223.235	204.976	341.484	380.683	460.517	499.67	499.627	418.761
AT5G15780	TCV < Mock < NES	0	-5.16422	-1.26795	100.175	101.795	183.15	3632.67	5090.75	5087.22	229.673	340.655	357.154
AT3G05625	TCV < Mock < NES	0	-2.28372	-1.26851	104.104	124.119	87.3044	502.583	540.286	493.647	238.439	244.515	277.232
AT4G30830	TCV < Mock < NES	0	-2.3571	-1.27095	19.6422	75.007	63.5804	324.467	257.729	228.602	114.837	143.832	123.214
AT4G01110	TCV < Mock < NES	0	-2.89471	-1.27212	18.6601	21.4306	31.3157	217.824	172.608	140.805	58.7332	61.3179	52.4492
AT5G30510	TCV < Mock < NES	0	-2.29085	-1.27264	3540.5	3550.33	3555.76	17133.2	18512.8	16452.7	8360.28	8413.42	8948.84
AT1G33470	TCV < Mock = NES	0	-1.46417	-1.27338	1005.68	1150.11	1669.22	3052.94	3692.15	3808.37	2560.59	3134.78	3550.73
AT5G28490	TCV < Mock < NES	0	-2.55496	-1.27583	51.0696	52.6835	125.263	474.221	366.496	505.243	174.446	195.309	184.821
AT5G39210	TCV < Mock < NES	0	-2.42674	-1.27595	179.726	108.939	164.17	790.746	910.329	733.845	370.808	327.029	398.781
AT1G18870	TCV < Mock < NES	0	-3.25765	-1.27788	17.678	32.1459	12.3365	204.21	170.243	220.319	42.0775	45.4207	63.2721
AT2G27680	TCV < Mock < NES	0	-2.16002	-1.2791	1464.32	1528.71	1256.42	6479.12	6232.8	6279.92	3234.71	3278.62	3799.66
AT4G24700	TCV < Mock < NES	0	-2.18618	-1.2794	253.384	250.916	223.955	997.225	1243.72	1073.43	523.339	610.908	633.553
AT3G22780	TCV < Mock < NES	0	-1.63795	-1.28027	362.398	359.855	523.827	1243.41	1228.35	1406.4	939.731	1071.17	1015.68
AT5G19760	TCV < Mock = NES	0	-1.26539	-1.28193	4250.57	4515.6	4755.24	10494.1	12346.2	9664.22	10142.4	10368	12368.9
AT5G16715	TCV < Mock < NES	0	-2.32711	-1.28294	748.367	964.376	800.923	4325.85	3967.62	4320.24	2058.29	2080.27	1978.09
AT1G78180	TCV < Mock < NES	0	-2.2452	-1.28298	155.173	162.515	175.558	787.342	799.198	752.067	417.269	395.917	387.125
AT2G24395	TCV < Mock < NES	0	-2.22878	-1.2835	120.799	130.369	116.722	508.256	651.417	564.878	301.555	304.319	289.72
AT5G23430	TCV < Mock = NES	0	-1.38286	-1.28359	178.744	111.618	216.363	392.537	413.786	515.182	391.847	457.992	383.795
AT4G18810	TCV < Mock < NES	0	-2.4383	-1.28455	876.041	1029.56	873.044	5404.75	4749.08	4906.66	2245.89	2003.05	2520.06
AT1G65230	TCV < Mock < NES	0	-2.85724	-1.28791	559.802	790.252	576.019	4801.2	5115.58	4040.29	1474.47	1401.98	1826.57
AT5G53760	TCV < Mock < NES	0	-1.93968	-1.28818	346.684	378.607	380.533	1587.16	1243.72	1411.37	812.622	910.685	977.387
AT2G33510	TCV < Mock = NES	0	-1.14847	-1.28911	402.664	275.026	323.596	729.483	819.296	670.897	739.863	863.75	843.35
AT1G19835	TCV < Mock < NES	0	-2.27464	-1.28942	891.755	796.503	1408.26	4536.86	5119.12	5327.42	2200.3	2491.32	2877.22
AT1G32440	TCV < Mock < NES	0	-2.59529	-1.28954	572.569	558.088	587.407	3481.78	3498.26	3402.52	1417.49	1334.61	1447.77
AT4G39800	TCV < Mock < NES	0	-3.02713	-1.29071	4309.49	5499.62	3747.45	36360.7	29715.7	44434.9	11851	8622.36	12692.7
AT3G59310	TCV < Mock < NES	0	-2.50667	-1.29418	264.187	181.267	465.94	1375.01	1896.32	1908.33	711.811	719.918	803.389
AT5G66600	TCV < Mock < NES	0	-3.19565	-1.29578	93.3003	58.9341	80.6617	822.512	554.473	757.036	174.446	172.599	224.782
AT5G48730	TCV < Mock < NES	0	-2.02725	-1.2964	279.901	279.49	299.872	1125.42	1242.54	1134.73	705.675	672.226	732.624
AT4G25835	TCV < Mock = NES	0	-1.72691	-1.29764	36.338	20.5376	43.6522	99.8359	117.042	115.957	74.5123	88.5703	84.0853
AT3G49140	TCV < Mock = NES	0	-1.55358	-1.29817	1430.93	1251.9	1320.95	3874.31	4545.73	3332.95	3268.9	3420.18	3156.94
AT5G04060	TCV < Mock < NES	0	-1.52293	-1.2993	360.434	313.422	353.014	949.576	1010.82	990.608	794.213	870.563	862.499
AT2G41290	TCV < Mock < NES	0	-3.48718	-1.30138	36.338	59.827	60.7335	544.56	608.856	606.292	143.765	143.075	99.9033
AT1G51500	TCV < Mock < NES	0	-2.77777	-1.3016	1874.85	1303.69	2405.62	12235.6	12054.2	14006	4911.67	4411.86	4441.53
AT1G72310	TCV < Mock < NES	0	-2.12685	-1.30161	180.708	159.836	157.528	724.945	678.609	771.945	404.119	422.412	401.278
AT4G11010	TCV < Mock < NES	0	-1.97761	-1.30175	1330.76	1243.87	1549.65	5146.09	5958.52	5138.57	3141.79	3613.22	3412.53
AT2G01150	TCV < Mock < NES	0	-1.83321	-1.30179	137.495	64.2917	120.518	470.817	321.571	356.155	240.192	267.225	287.222
ATCG00470	TCV < Mock < NES	0	-4.25192	-1.30334	20.6243	30.36	21.8261	467.414	517.823	402.538	55.2267	53.7478	70.7648
AT1G63420	TCV < Mock = NES	0	-1.49428	-1.30828	521.5	500.94	780.046	1743.73	1404.51	1929.86	1393.82	1422.42	1647.57
AT1G10910	TCV < Mock < NES	0	-2.30887	-1.30846	460.609	376.821	453.603	2069.33	2268.73	2059.07	1063.33	996.227	1138.07
AT5G64040	TCV < Mock < NES	0	-3.6498	-1.30968	6773.6	5995.2	6326.72	73709.5	91345	74625.2	16947.6	14166.7	16221
AT1G12260	TCV < Mock < NES	0	-2.1465	-1.31005	35.3559	32.1459	37.0095	163.368	161.968	137.492	81.5252	105.225	72.4299
AT1G09340	TCV < Mock < NES	0	-3.46373	-1.31119	3798.8	3201.19	3574.74	37654	41456.6	37558.6	8266.48	8060.66	9913.74
AT5G01090	TCV < Mock < NES	0	-1.89148	-1.31121	840.685	594.698	767.71	2523.13	2720.35	2930.41	1835.63	1970.5	1660.89
AT3G56870	TCV < Mock < NES	0	-2.29259	-1.31141	35.3559	88.4011	45.5501	282.49	292.015	255.106	127.986	158.215	134.037
AT1G11860	TCV < Mock < NES	0	-3.25357	-1.31146	4062	3480.68	4341.5	37078.8	39669.1	36594.5	9297.38	8825.24	11373.2
AT1G63170	TCV < Mock < NES	0	-1.63519	-1.3117	824.971	800.967	743.986	2368.83	2733.35	2259.51	2081.96	2072.7	1728.33
AT3G47830	TCV < Mock < NES	0	-2.71201	-1.31224	19.6422	22.3235	30.3668	176.982	118.225	178.906	55.2267	62.8319	61.607
AT2G38970	TCV < Mock < NES	0	-2.78727	-1.31229	112.942	121.44	145.191	804.36	762.548	1053.56	268.244	308.104	366.312
AT3G04340	TCV < Mock = NES	0	-1.20765	-1.31311	2212.69	3010.99	2772.86	6145.58	5697.24	6626.14	6706.1	7607.21	5556.29
AT3G02660	TCV < Mock < NES	0	-2.64392	-1.31395	219.992	266.096	279.944	1493	1696.52	1598.56	577.689	594.254	732.624
AT1G16750	TCV < Mock < NES	0	-2.39688	-1.31419	135.531	98.2234	182.201	665.951	675.062	849.802	323.471	334.599	376.302
AT1G03687	TCV < Mock = NES	0	-1.41365	-1.31877	130.62	114.296	129.059	349.426	357.038	289.894	326.101	342.926	263.911
AT4G15790	TCV < Mock < NES	0	-2.49465	-1.31881	141.424	158.943	181.252	785.073	1082.94	846.489	317.335	408.786	475.373
AT4G10030	TCV < Mock < NES	0	-2.94839	-1.31939	130.62	99.1164	150.885	899.658	1087.67	950.851	354.152	278.58	317.193
AT1G27660	TCV < Mock < NES	0	-1.79313	-1.32022	104.104	116.975	114.824	414.092	364.132	385.973	241.069	283.879	313.863
AT5G26742	TCV < Mock = NES	0	-1.49749	-1.3217	7680.09	7546.24	8595.69	21857.3	21490.9	23913.7	19423.2	21485.5	18637
AT1G71050	TCV < Mock < NES	0	-1.85488	-1.32185	164.994	161.622	260.964	699.986	650.235	775.258	491.781	561.702	415.431
AT1G17350	TCV < Mock = NES	0	-1.5576	-1.32211	80.5329	50.0047	83.5086	189.461	243.543	197.128	184.089	177.141	173.998
AT4G00020	TCV < Mock < NES	0	-2.13326	-1.32695	45.1092	131.636	99.1513	369.799	418.627	422.057	225.043	230.474	236.677
AT4G37920	TCV < Mock < NES	0	-2.24457	-1.32751	282.847	504.511	270.454	1761.88	1843.12	1408.05	806.486	933.395	914.948
AT2G19940	TCV < Mock < NES	0	-2.04144	-1.32982	597.122	385.75	632.008	2088.61	2286.46	2272.77	1275.47	1494.34	1289.59
AT2G23380	TCV < Mock < NES	0	-1.96441	-1.33172	142.406	125.905	130.008	512.794	541.468	500.274	305.939	376.992	319.691
AT3G51600	TCV < Mock < NES	0	-2.10813	-1.3356	1738.33	669.705	2432.19	6956.75	8222.52	5688.54	3745.77	4090.13	4379.93
AT1G23080	TCV < Mock = NES	0	-1.64434	-1.3364	443.913	301.814	500.103	1314.88	1121.95	1457.75	968.659	1015.15	1162.21
AT3G60370	TCV < Mock = NES	0	-1.4425	-1.33887	409.539	450.042	407.104	1097.06	1300.47	1045.27	974.796	1111.29	1118.08
AT3G19080	TCV < Mock < NES	0	-1.96168	-1.34174	148.298	95.5446	153.732	504.852	573.389	470.456	390.97	352.01	264.744
AT4G32410	TCV < Mock < NES	0	-1.76093	-1.34241	5738.46	4572.75	7076.4	18451.5	18182.9	22295.3	13584	15111.5	15395.1
AT4G14960	TCV < Mock = NES	0	-1.0551	-1.34354	7043.42	6416.55	7565.66	11785.7	17348.4	14554.1	17668.8	17872.4	17816.5
AT1G70410	TCV < Mock < NES	0	-3.2166	-1.34393	1098	594.698	1336.14	8833.21	10828.2	8494.71	2330.04	2701.02	2657.43
AT5G15050	TCV < Mock < NES	0	-2.36571	-1.34424	231.778	222.342	234.393	1082.31	1263.82	1202.64	492.658	567.001	688.5
AT3G27060	TCV < Mock < NES	0	-3.01888	-1.34578	154.191	252.702	185.996	1598.51	1679.97	1527.33	483.015	492.814	531.153
AT5G05740	TCV < Mock < NES	0	-2.54928	-1.34657	387.933	383.071	450.757	2427.83	2454.34	2269.45	1001.97	1063.6	1041.49
AT3G56480	TCV < Mock < NES	0	-1.94004	-1.34675	349.631	235.736	520.031	1136.77	1584.21	1520.7	745.999	1018.18	1047.32
AT3G54790	TCV < Mock < NES	0	-1.80634	-1.34678	276.955	192.875	218.261	723.81	735.357	947.538	523.339	612.422	614.405
AT5G08390	TCV < Mock < NES	0	-2.2532	-1.34759	263.205	227.7	397.615	1365.94	1364.31	1505.79	622.396	755.497	883.312
AT2G35620	TCV < Mock < NES	0	-2.27371	-1.34803	280.883	198.233	384.329	1355.73	1345.4	1474.32	668.857	710.834	818.375
AT5G54970	TCV < Mock < NES	0	-2.63644	-1.34924	31.4275	67.8635	55.9887	308.584	368.861	288.237	127.109	128.692	139.865
AT1G36390	TCV < Mock < NES	0	-2.20229	-1.34929	449.806	459.864	479.225	2085.21	2585.57	1721.14	1130.83	1140.82	1267.11
AT5G22140	TCV < Mock < NES	0	-2.40496	-1.35109	22.5885	23.2164	23.724	137.274	130.047	101.049	69.2526	59.0469	49.1191
AT3G05370	TCV < Mock = NES	0	-1.64344	-1.35112	283.829	323.244	248.628	1033.53	727.081	912.751	798.596	768.366	616.07
AT3G61380	TCV < Mock < NES	0	-2.68744	-1.35116	150.263	183.053	214.465	1112.94	1216.53	1199.33	445.32	436.039	516.167
AT4G02900	TCV < Mock = NES	0	-1.08159	-1.35117	121.781	158.05	152.783	314.256	251.818	349.529	346.263	401.973	355.489
AT1G27950	TCV < Mock < NES	0	-3.51601	-1.35169	497.929	202.697	1565.79	6877.33	10994.9	8055.73	2003.94	2130.99	1649.24
AT3G02830	TCV < Mock < NES	0	-2.09026	-1.35253	2748.92	3959.3	2778.56	13316.8	13384.2	13696.2	7050.61	7605.69	9569.07
AT4G36910	TCV < Mock < NES	0	-1.85196	-1.35253	184.636	326.816	223.006	901.927	924.516	824.954	511.066	592.74	771.753
AT1G03630	TCV < Mock < NES	0	-2.70877	-1.3543	1207.99	1451.92	1675.87	9138.39	10075.1	9132.48	3453.86	3314.95	4316.66
AT2G46535	TCV < Mock < NES	0	-2.80599	-1.35515	74.6402	78.5787	98.692	543.425	600.581	617.887	159.544	179.412	305.538
AT5G08720	TCV < Mock < NES	0	-2.59995	-1.35552	711.047	683.992	612.08	3961.67	4206.43	4000.53	1651.54	1665.42	1819.07
AT3G06750	TCV < Mock < NES	0	-3.31292	-1.35614	337.845	194.661	334.983	2853.27	2998.17	2769.73	636.422	766.852	817.542
AT5G14660	TCV < Mock < NES	0	-2.2816	-1.35648	391.861	308.064	331.187	1669.98	1720.17	1623.4	951.127	934.909	754.27
AT4G29060	TCV < Mock < NES	0	-2.59768	-1.35775	4451.9	4205.75	4570.2	25324.3	28514.6	26231.2	11235.6	11625.4	11040.1
AT1G13380	TCV < NES < Mock	0	-1.07439	-1.35872	338.827	254.488	359.656	639.858	734.174	632.796	842.427	853.152	748.442
AT5G36740	TCV < Mock < NES	0	-1.97056	-1.35884	52.0518	35.7176	49.346	200.806	158.421	178.245	120.096	123.393	108.229
AT2G21385	TCV < Mock < NES	0	-3.15271	-1.35941	541.142	505.404	519.082	4397.32	5182.96	4343.43	1319.31	1339.15	1358.68
AT2G16850	TCV < Mock < NES	0	-2.7182	-1.36083	24.5527	20.5376	66.4273	211.017	277.828	245.167	59.6098	112.795	114.056
AT5G58580	TCV < Mock < NES	0	-2.21016	-1.36092	40.2664	53.5764	43.6522	199.672	224.627	212.036	116.59	106.739	129.874
AT3G55400	TCV < Mock < NES	0	-2.10731	-1.36208	609.889	464.329	519.082	2312.11	2297.1	2256.2	1611.22	1383.06	1101.43
AT5G53500	TCV < Mock < NES	0	-2.27477	-1.36354	540.16	281.276	640.549	2097.69	2681.33	2295.96	1040.54	1595.02	1126.41
AT5G18860	TCV < Mock < NES	0	-2.19561	-1.36389	186.601	207.162	247.679	1229.8	782.646	926.003	560.157	598.796	492.024
AT5G46880	TCV < Mock < NES	0	-2.49309	-1.36401	98.2109	37.5035	174.609	654.606	567.478	525.122	273.504	283.879	241.433
AT3G25860	TCV < Mock < NES	0	-2.82567	-1.36434	448.824	326.816	550.398	2613.89	3802.1	2985.08	1042.29	1144.6	1227.15
AT3G25480	TCV < Mock < NES	0	-2.28471	-1.3662	488.108	507.19	396.666	2264.46	2619.86	1898.39	1070.35	1180.18	1337.87
AT3G29185	TCV < Mock < NES	0	-2.48714	-1.36879	452.752	444.684	528.571	2600.27	2961.52	2433.45	1175.54	1205.16	1302.07
AT1G17840	TCV < Mock < NES	0	-2.73429	-1.36998	1299.33	647.382	1876.1	7504.58	8375.62	9558.21	3329.38	3365.48	3185.87
AT5G66530	TCV < Mock < NES	0	-2.38415	-1.3701	366.326	362.534	320.749	1720.63	2013.36	1745.46	888.44	911.442	913.283
AT1G73177	TCV < Mock = NES	0	-1.43655	-1.37099	57.9444	70.5423	52.1929	135.005	195.07	159.027	178.829	145.346	143.195
AT1G05190	TCV < Mock < NES	0	-2.56118	-1.37146	2969.9	2238.6	2741.55	15484.8	17805.8	13630	6619.32	6823.7	7126.44
AT4G13720	TCV < Mock = NES	0	-1.57288	-1.37358	202.314	160.729	189.792	532.08	637.23	475.425	504.053	532.179	396.283
AT3G53900	TCV < Mock < NES	0	-3.28672	-1.37697	66.7834	113.403	95.8451	862.219	942.25	889.559	236.686	267.982	212.295
AT5G64630	TCV < Mock < NES	0	-2.4983	-1.37926	27.499	52.6835	46.4991	218.958	284.921	212.036	95.551	107.496	126.544
AT1G31150	TCV < Mock = NES	0	-1.44984	-1.38048	225.885	191.089	236.291	581.998	578.118	624.514	486.521	620.749	593.592
AT5G05620	TCV < Mock = NES	0	-1.61572	-1.38259	224.903	145.114	253.373	611.495	666.237	632.796	490.028	609.395	526.027
AT1G29520	TCV < Mock < NES	0	-2.66089	-1.38259	50.0875	25.8962	56.6312	276.818	292.012	270.015	117.461	114.309	114.054
AT4G37820	TCV < Mock = NES	0	-1.48798	-1.38293	893.719	579.518	772.454	2062.52	2074.84	2161.78	1903.13	2103.73	1849.88
AT1G75280	TCV < Mock < NES	0	-3.20513	-1.38309	423.289	455.4	438.42	4041.09	3570.38	4535.59	1087	986.386	1362.02
AT2G16750	TCV < Mock < NES	0	-3.02918	-1.38339	59.9086	33.0388	33.2136	307.449	333.393	389.286	75.3889	93.1124	160.678
AT5G44030	TCV < Mock < NES	0	-1.8985	-1.38346	195.44	187.517	274.25	753.307	832.301	864.711	480.385	713.105	521.162
AT1G24764	TCV < Mock = NES	0	-1.31927	-1.38367	287.758	180.374	391.921	689.775	709.347	747.097	731.097	763.824	749.275
AT5G66750	TCV < Mock < NES	0	-2.30423	-1.38383	42.2307	75.007	97.743	326.736	380.683	354.498	154.284	220.29	186.486
AT2G01990	TCV < Mock < NES	0	-2.19097	-1.3844	73.6581	50.8976	38.9074	234.841	248.272	263.389	122.726	181.683	122.382
AT4G18470	TCV < Mock = NES	0	-1.39969	-1.38476	28.4811	46.4329	27.5199	85.0874	79.2104	106.018	91.1679	93.1124	83.2528
AT5G64460	TCV < Mock < NES	0	-3.0032	-1.38512	496.947	423.254	495.358	3589.56	4341.21	3419.09	1263.2	1227.87	1206.33
AT5G19260	TCV < Mock < NES	0	-2.31155	-1.38643	120.799	78.5787	163.221	527.542	701.072	571.505	279.64	285.393	382.963
AT4G14510	TCV < Mock < NES	0	-2.20117	-1.38773	443.336	252.759	388.225	1542.28	1632.68	1811.4	898.101	1006.83	932.431
AT5G60210	TCV < Mock < NES	0	-2.36936	-1.38859	192.493	93.7587	195.486	890.582	899.689	699.058	378.698	440.581	442.072
AT5G02830	TCV < Mock < NES	0	-2.23112	-1.38887	1837.53	1759.09	1447.17	7830.31	7517.9	8332.37	4203.37	4160.53	4844.48
AT2G36000	TCV < Mock < NES	0	-2.29726	-1.39089	553.909	474.151	573.173	2460.73	3060.83	2348.97	1363.14	1456.49	1379.5
AT3G27850	TCV < Mock < NES	0	-2.65298	-1.39149	2082.89	1749.52	2192.33	11476.9	15639.1	10777.6	5034.01	5374.39	5397.48
AT4G02200	TCV < Mock < NES	0	-2.21406	-1.39156	633.46	473.258	568.428	2903.18	2627.98	2241.29	1562.87	1524.37	1307.76
AT5G14210	TCV < Mock < NES	0	-3.27649	-1.39201	323.114	297.349	389.074	3263.51	2933.36	3585.75	789.291	883.591	976.638
AT1G53040	TCV < Mock = NES	0	-1.48282	-1.39589	297.579	281.276	311.259	787.342	868.95	831.58	724.084	810.759	807.552
AT3G63140	TCV < Mock < NES	0	-3.83794	-1.39746	1303.26	1286.73	1362.71	18726	19385.3	18412.4	3222.44	2746.44	4444.03
AT1G72130	TCV < Mock < NES	0	-2.60908	-1.39806	347.666	381.286	311.259	2031.89	2037.01	2277.74	1145.74	828.17	767.59
AT2G30320	TCV < Mock < NES	0	-2.4305	-1.4069	142.406	172.337	130.008	825.915	884.32	687.462	422.528	399.702	357.154
AT1G12750	TCV < Mock < NES	0	-2.56216	-1.40696	154.191	123.226	172.711	881.506	764.913	1012.14	390.97	398.945	403.776
AT5G16240	TCV < Mock < NES	0	-3.43435	-1.40702	109.014	104.474	120.518	1271.77	1126.68	1212.58	270.874	286.907	328.016
AT1G77490	TCV < Mock < NES	0	-3.76851	-1.40704	483.197	436.648	542.806	6567.62	6963.43	6402.51	1186.06	1272.54	1420.29
AT4G03210	TCV < Mock < NES	0	-3.16117	-1.40846	215.082	260.739	873.993	3345.64	4576.47	4152.93	804.732	1390.63	1387.82
AT5G45590	TCV < Mock < NES	0	-2.05934	-1.41137	93.3003	82.1505	117.671	398.209	482.356	341.246	244.576	268.739	266.409
AT1G08260	TCV < Mock = NES	0	-1.23799	-1.41147	238.652	284.054	369.284	678.858	625.408	799.709	823.141	831.198	718.471
AT4G11175	TCV < Mock < NES	0	-2.53575	-1.41171	793.544	700.958	716.466	4077.39	5288.18	3455.53	1789.17	2014.41	2078.82
AT3G24430	TCV < Mock < NES	0	-2.70373	-1.4124	797.472	820.612	773.403	5030.37	5331.93	5218.08	2061.8	1972.01	2331.91
AT2G35190	TCV < Mock < NES	0	-3.17526	-1.41603	45.177	94.6517	111.977	714.734	909.147	651.018	173.57	202.879	295.547
AT5G07590	TCV < Mock < NES	0	-2.3107	-1.41612	59.9086	28.5741	64.5294	257.531	256.547	245.167	106.07	157.458	144.86
AT2G23755	TCV < Mock = NES	0	-1.13156	-1.41723	151.245	122.333	167.017	348.291	355.338	261.733	377.821	378.506	420.426
AT3G61830	TCV < Mock < NES	0	-2.17814	-1.41807	199.368	136.62	204.027	867.892	749.544	826.611	486.521	467.076	489.526
AT4G21750	TCV < Mock < NES	0	-2.64949	-1.41832	665.87	325.03	1346.58	4197.65	4704.15	5764.74	2145.95	2314.94	1786.6
AT3G44160	TCV < NES < Mock	0	-1.00891	-1.41922	219.992	199.126	228.7	459.472	451.618	392.599	557.527	597.282	577.774
AT1G15980	TCV < Mock < NES	0	-3.50532	-1.41935	792.562	1124.21	866.402	10723.3	10816.4	10065.1	2300.24	2115.09	3028.74
AT1G01080	TCV < Mock < NES	0	-2.84588	-1.42103	467.484	425.04	495.358	3337.7	3411.96	3228.59	1121.19	1299.03	1296.25
AT5G10390	TCV < Mock < NES	0	-2.03071	-1.42254	68.7476	129.476	94.8961	385.73	407.875	404.195	256.848	222.561	306.37
AT2G47940	TCV < Mock < NES	0	-2.04053	-1.4227	1978.95	1787.64	2343.93	8151.38	9077.28	7909.95	5630.5	5710.14	5040.95
AT5G24314	TCV < Mock < NES	0	-2.86584	-1.42405	438.02	372.356	435.573	3037.05	3433.24	2612.36	1061.58	1061.33	1220.49
AT3G10720	TCV < Mock < NES	0	-3.69937	-1.4252	308.382	92.8658	1324.75	7114.44	8185.87	7121.44	1898.75	1569.28	1167.2
AT5G26200	TCV < Mock < NES	0	-3.25158	-1.42615	26.5169	18.7517	16.1323	225.765	223.444	135.836	49.0904	64.346	51.6167
AT1G17850	TCV < Mock = NES	0	-1.41876	-1.42638	190.529	321.459	232.496	652.479	721.757	616.231	670.61	696.643	633.759
ATCG00040	TCV < Mock < NES	0	-2.73373	-1.42703	15.7137	20.5376	20.8771	115.719	141.869	122.584	49.967	45.4207	58.2769
AT1G60600	TCV < Mock < NES	0	-2.37245	-1.42894	345.702	374.142	365.35	1853.77	2076.02	1689.67	884.504	1049.22	988.21
AT1G24610	TCV < NES < Mock	0	-1.2648	-1.43065	460.609	439.327	519.082	1133.36	1212.98	1063.5	1256.19	1286.16	1282.92
AT5G42765	TCV < Mock < NES	0	-2.6829	-1.43127	463.555	408.967	464.991	2723.93	3433.24	2431.79	1097.52	1264.97	1244.63
AT1G33040	TCV < Mock < NES	0	-2.50152	-1.43164	378.112	269.668	394.768	1783.43	2306.56	1813.91	874.862	907.657	1029.84
AT5G60920	TCV < Mock = NES	0	-1.82101	-1.43245	1462.36	1492.1	2186.41	5762.12	6012.9	6389.25	3994.73	4353.57	5527.15
AT5G27450	TCV < Mock = NES	0	-1.30713	-1.43588	259.277	170.552	226.802	515.063	644.324	465.486	564.54	677.525	534.483
AT1G27680	TCV < Mock = NES	0	-1.25592	-1.43603	256.33	257.167	317.902	669.354	575.754	740.471	738.986	872.077	638.549
AT2G28315	TCV < Mock < NES	0	-2.43098	-1.43616	24.5527	40.1823	39.8564	189.461	189.159	185.532	84.155	100.683	98.2383
AT4G01310	TCV < Mock < NES	0	-2.88554	-1.43684	1337.63	1208.15	1541.11	9713.58	11632.1	8855.84	3714.22	3882.71	3467.48
AT4G23440	TCV < Mock < NES	0	-2.28906	-1.43811	104.104	47.3258	163.221	515.063	472.898	549.97	254.218	310.375	288.055
AT3G27160	TCV < Mock < NES	0	-3.33954	-1.43864	844.613	702.744	948.012	8642.61	9387.03	7230.77	2178.39	2243.02	2342.73
AT1G68590	TCV < Mock < NES	0	-3.41247	-1.43951	1103.89	813.469	1039.11	9934.81	12391.1	9154.01	2345.82	2651.81	3021.24
AT5G10160	TCV < Mock < NES	0	-2.68038	-1.44116	134.549	103.581	158.477	723.81	1061.66	757.036	312.951	386.076	377.968
AT4G23670	TCV < Mock < NES	0	-3.24568	-1.44359	2107.6	2494.88	2906.67	19170.8	25827.3	26227.9	7256.62	6209.01	6959.1
AT2G46140	TCV < Mock < NES	0	-2.7646	-1.44369	52.0518	19.6447	64.5294	393.671	258.912	273.328	99.9341	115.823	154.85
AT3G51950	TCV < Mock < NES	0	-2.53822	-1.44437	3530.68	2302	4372.81	18567.2	20688.1	20025.8	8640.79	9148.48	9984.5
AT2G18060	TCV < Mock < NES	0	-2.73855	-1.44678	31.4275	12.5012	27.5199	169.04	165.514	142.462	73.6356	62.0749	59.1095
AT5G04310	TCV < Mock < NES	0	-2.82827	-1.44751	11.7853	8.9294	12.3365	71.4734	92.2151	71.231	28.0517	28.0094	34.1336
AT2G26860	TCV < Mock = NES	0	-1.35895	-1.44759	312.311	257.167	310.31	684.103	770.824	801.763	892.394	897.058	610.243
AT5G42880	TCV < Mock < NES	0	-2.57818	-1.4478	24.5527	17.8588	28.4688	144.081	150.145	129.21	45.584	53.7478	94.0756
AT3G14000	TCV < Mock < NES	0	-2.06506	-1.44834	42.2307	29.467	39.8564	179.251	141.869	145.775	107.824	115.066	81.5877
AT3G48610	TCV < Mock < NES	0	-2.70928	-1.44925	373.201	277.704	589.305	2683.09	2499.27	2928.75	1006.35	1134	1246.29
AT4G28706	TCV < Mock < NES	0	-2.85168	-1.44952	185.005	207.033	217.164	1546.81	1405.7	1445.12	434.801	505.264	723.826
AT1G52510	TCV < Mock < NES	0	-3.29713	-1.44959	517.571	410.753	584.56	5008.81	4911.05	4951.38	1232.52	1327.04	1572.64
AT5G02520	TCV < Mock = NES	0	-1.81051	-1.45068	29.4633	21.4306	22.7751	90.7599	73.2992	94.4225	58.7332	80.2432	62.4396
AT5G08050	TCV < Mock < NES	0	-3.19059	-1.45091	812.204	687.564	902.462	7049.78	8047.54	6834.86	2212.58	2013.65	2341.07
AT5G62840	TCV < Mock < NES	0	-2.67257	-1.45201	154.191	100.902	153.732	847.471	871.315	887.903	361.165	402.73	354.657
AT4G18740	TCV < Mock < NES	0	-2.69456	-1.45341	310.346	234.843	286.586	1736.92	2138.68	1509.1	765.285	685.095	827.532
AT2G36990	TCV < Mock < NES	0	-2.24193	-1.45482	1246.3	959.911	1239.34	5316.26	5918.32	5064.03	3139.16	3226.38	3079.52
AT3G23050	TCV < Mock < NES	0	-2.20557	-1.45484	1417.18	784.895	1828.65	5189.2	7507.26	5895.61	3926.36	3272.56	3850.44
AT4G36940	TCV < Mock = NES	0	-1.44633	-1.45642	255.348	250.023	257.169	735.155	628.955	713.967	661.844	687.366	743.447
AT4G34570	TCV < Mock = NES	0	-1.49422	-1.45788	158.119	209.841	180.303	474.221	565.113	505.243	470.742	595.011	440.407
AT3G20640	TCV < Mock < NES	0	-2.12548	-1.45802	66.7834	54.4694	59.7846	289.297	267.187	233.571	172.693	174.87	149.855
AT1G71920	TCV < Mock = NES	0	-1.44336	-1.45947	132.339	102.425	145.045	339.59	381.996	311.372	334.363	394.289	315.902
AT2G32720	TCV < Mock < NES	0	-2.83281	-1.4598	345.702	277.704	333.085	2101.09	2619.86	2093.86	702.168	801.675	1127.24
AT3G15380	TCV < NES < Mock	0	-1.04274	-1.46102	699.261	537.55	731.649	1327.36	1252	1475.97	1771.64	1932.65	1715.01
AT2G32560	TCV < Mock < NES	0	-2.38921	-1.46138	600.068	775.965	699.384	3956	3487.62	3429.03	1803.2	1669.97	2242
AT2G24060	TCV < Mock < NES	0	-2.38513	-1.46193	628.549	521.477	616.825	2999.62	3455.7	2774.7	1489.37	1748.7	1629.26
AT3G25660	TCV < Mock < NES	0	-2.7078	-1.46283	550.963	542.015	649.09	3757.46	4007.81	3616.22	1502.52	1633.63	1665.89
AT1G76450	TCV < Mock < NES	0	-2.73129	-1.46374	760.152	638.452	744.935	4570.9	5427.69	4235.76	1918.03	1937.19	2057.18
AT2G43030	TCV < Mock < NES	0	-2.77166	-1.46647	1849.31	1654.62	2123.78	11938.3	14695.3	11797.8	4952	5380.84	5219.12
AT1G12860	TCV < Mock < NES	0	-2.96979	-1.46668	238.652	155.372	222.057	1681.33	1838.39	1307.01	562.787	631.347	508.674
AT5G62940	TCV < Mock < NES	0	-2.70472	-1.4669	62.8549	39.2894	64.5294	448.127	373.59	265.046	134.999	180.926	144.86
AT1G64760	TCV < Mock < NES	0	-2.86831	-1.46753	95.2645	24.1094	85.4065	470.817	542.651	482.052	198.115	230.888	137.367
AT3G22210	TCV < Mock < NES	0	-2.44918	-1.4684	519.535	508.976	469.736	2811.29	3232.26	2138.59	1243.92	1512.51	1389.49
AT1G49510	TCV < Mock = NES	0	-1.44255	-1.46926	503.822	500.94	513.388	1339.84	1663.42	1123.13	1318.43	1607.14	1277.93
AT1G74880	TCV < Mock < NES	0	-2.49764	-1.46941	1286.56	845.614	961.298	5317.4	6537.82	5615.65	3049.74	2753.25	2763.16
AT1G56050	TCV < Mock < NES	0	-2.7445	-1.47029	275.972	269.668	381.482	1777.76	2388.14	2047.48	824.018	943.993	800.891
AT4G07455	TCV < Mock < NES	0	-2.04631	-1.47095	64.8192	48.2188	75.9169	266.607	325.117	188.845	163.927	172.599	187.319
AT2G16365	TCV < Mock = NES	0	-1.3356	-1.47247	1050.86	1324.23	1161.53	3060.88	2777.09	3087.78	3220.68	3232.44	3360.91
AT2G25880	TCV < Mock < NES	0	-2.59697	-1.4754	19.6422	10.7153	19.9282	100.97	120.589	82.8267	48.2138	49.2057	42.4589
AT4G22570	TCV < Mock < NES	0	-2.56327	-1.47608	459.627	837.578	621.57	3683.72	3582.2	4075.08	1499.89	1401.23	2436.81
AT1G47670	TCV < Mock < NES	0	-2.37415	-1.47656	47.1412	41.0753	55.0398	232.572	251.818	258.419	128.862	165.785	104.066
AT5G03640	TCV < Mock < NES	0	-3.19821	-1.4772	18.6601	26.7882	34.1626	289.297	224.627	217.006	79.7719	71.1591	70.7648
AT3G47295	TCV < Mock < NES	0	-3.51872	-1.47825	194.457	311.636	146.14	2721.66	2580.84	2173.37	568.046	463.291	785.906
AT1G60800	TCV < Mock < NES	0	-2.77223	-1.47864	835.774	592.912	725.955	4744.48	4757.36	5218.08	1949.59	1945.52	2109.62
AT1G65470	TCV < Mock < NES	0	-2.60325	-1.47893	52.0518	123.226	69.2742	501.449	514.277	470.456	193.732	232.402	255.586
AT5G64640	TCV < Mock < NES	0	-2.69862	-1.48121	41.2486	35.7176	41.7543	279.087	239.996	251.793	103.441	109.01	119.051
AT4G05520	TCV < Mock < NES	0	-2.67247	-1.4832	27.499	33.0388	25.622	206.479	202.164	140.805	75.3889	84.7853	80.7552
AT5G12440	TCV < Mock = NES	0	-1.55159	-1.48339	438.02	348.247	490.613	1144.71	1405.69	1192.71	953.757	1202.89	1413.63
AT1G14280	TCV < Mock < NES	0	-3.02237	-1.48372	989.965	780.43	831.29	6304.41	7497.8	7336.79	2725.4	2360.36	2190.38
AT1G31230	TCV < Mock = NES	0	-1.90182	-1.48409	798.454	777.751	730.7	3180	2112.67	3327.98	1904.88	2165.81	2382.69
AT3G23700	TCV < Mock < NES	0	-3.33062	-1.48487	646.227	750.07	709.823	7139.4	7807.55	6241.82	1858.42	1856.95	2179.56
AT3G53750	TCV < Mock < NES	0	-3.30547	-1.49	136.513	101.795	207.823	1438.54	1551.11	1421.31	350.646	383.048	519.497
AT2G33855	TCV < Mock < NES	0	-2.44115	-1.4913	528.374	488.438	470.685	2372.24	2991.08	2715.06	1419.24	1455.73	1307.07
AT5G55220	TCV < Mock < NES	0	-2.91533	-1.49301	1242.37	1351.91	1515.49	9817.96	11489.1	9697.35	3679.15	4182.49	3706.41
AT4G10340	TCV < Mock < NES	0	-2.40666	-1.49541	43555.5	24188.9	38273.5	181279	196858	184016	111386	99651.5	87873.3
AT3G59780	TCV < Mock < NES	0	-2.98537	-1.49701	1934.75	1758.2	2043.11	14739.4	14434	16252.3	5259.69	4826.7	6104.09
AT1G10360	TCV < Mock < NES	0	-2.58762	-1.49734	392.843	307.171	387.176	2062.52	2365.67	2107.11	1051.06	1098.42	919.943
AT4G04330	TCV < Mock < NES	0	-3.93741	-1.49806	6.87476	1.78588	7.59169	86.2219	96.9441	66.2614	18.4089	15.8972	11.6554
AT4G36390	TCV < Mock < NES	0	-2.19495	-1.49999	975.234	942.052	943.267	4243.03	4561.1	4293.74	2735.91	2702.53	2652.43
AT1G79060	TCV < Mock < NES	0	-2.39407	-1.50068	26.5169	33.0388	26.5709	170.175	150.145	132.523	76.2655	81.7572	85.7503
AT5G44635	TCV < Mock < NES	0	-3.1448	-1.50132	19.6422	70.5423	55.9887	425.437	446.889	420.76	100.811	141.561	171.501
AT5G24000	TCV < Mock = NES	0	-1.58054	-1.50299	96.2466	110.725	81.6107	239.379	315.66	308.115	281.393	279.337	257.251
AT4G39710	TCV < Mock < NES	0	-2.86141	-1.5034	559.802	350.033	394.768	3362.66	3255.9	2862.49	1095.77	1155.2	1447.77
AT1G14460	TCV < Mock = NES	0	-1.87319	-1.50539	472.394	413.431	570.326	1708.56	1581.84	2044.16	1207.98	1345.97	1580.14
AT1G29530	TCV < Mock < NES	0	-2.85527	-1.50625	311.328	290.206	302.719	2154.41	2288.83	2100.49	767.915	808.488	992.373
AT3G16750	TCV < Mock = NES	0	-1.26482	-1.50758	106.068	90.187	100.59	234.841	273.099	205.41	284.023	319.459	240.6
AT3G04550	TCV < Mock < NES	0	-3.31543	-1.50903	316.239	169.659	275.199	2475.48	2673.06	2428.48	708.305	640.432	817.542
AT4G36160	TCV < Mock < NES	0	-2.10615	-1.51021	48.1233	35.7176	41.7543	214.42	185.613	140.805	131.492	126.421	99.9033
AT1G48330	TCV < Mock < NES	0	-2.00994	-1.51069	43.2128	50.0047	43.6522	189.461	212.804	149.088	110.453	134.748	144.86
AT1G48520	TCV < Mock < NES	0	-2.52795	-1.51074	766.045	594.698	663.324	4128.44	4149.68	3395.9	1783.91	1925.84	2058.01
AT2G40260	TCV < Mock < NES	0	-2.95093	-1.51118	74.6402	87.5082	60.7335	609.226	529.646	584.757	221.784	193.795	219.787
AT3G18390	TCV < Mock < NES	0	-2.19452	-1.51149	1483.97	1292.08	1504.1	6526.77	6858.21	6207.04	4132.36	4180.22	3890.4
AT3G25710	TCV < Mock < NES	0	-2.63159	-1.51281	189.547	231.272	158.477	1327.36	1230.72	1032.02	525.092	684.338	443.737
AT4G19230	TCV < Mock < NES	0	-2.66443	-1.51419	139.459	67.8635	87.3044	637.589	715.258	515.182	286.653	253.599	301.375
AT1G74690	TCV < Mock < NES	0	-2.68743	-1.51437	584.355	429.504	764.863	3648.55	4024.36	3785.18	1527.94	1675.27	1878.18
AT1G62780	TCV < Mock < NES	0	-3.13426	-1.51447	763.098	729.532	684.201	6509.76	7360.66	5242.93	1805.83	2068.91	2344.4
AT2G43340	TCV < Mock < NES	0	-2.27432	-1.51477	508.732	450.935	628.212	2308.71	2846.85	2526.22	1524.43	1542.79	1470.24
AT1G55140	TCV < Mock < NES	0	-2.48175	-1.51656	248.473	158.943	223.006	1132.23	1291.01	1098.28	532.105	630.59	641.046
AT5G45340	TCV < Mock < NES	0	-4.12602	-1.51704	351.595	228.593	343.524	5207.35	7258.99	3662.6	888.011	1085.55	670.185
AT1G68890	TCV < Mock < NES	0	-2.3627	-1.5185	745.42	634.881	774.352	3735.91	3329.2	4017.1	1883.85	2286.93	2002.23
AT3G18890	TCV < Mock < NES	0	-2.96284	-1.52011	1388.7	1680.51	1514.54	11112.4	11724.3	12901.1	4490.9	4370.98	4285.02
AT5G44410	TCV < Mock = NES	0	-1.65383	-1.52179	199.368	229.486	200.231	619.437	680.973	679.179	542.625	591.983	671.85
AT1G19720	TCV < Mock = NES	0	-1.49147	-1.52188	1756.99	1642.12	1867.56	4756.95	4212.34	5839.29	5575.27	5368.72	4180.12
ATCG00540	TCV < Mock < NES	0	-2.85216	-1.52287	19.6422	24.1094	19.9282	169.04	133.594	157.371	41.2009	63.589	78.2576
AT4G28080	TCV < Mock < NES	0	-2.08604	-1.52294	9606	6430.96	9875.84	34387.8	35963.9	39669	27411.7	25753.5	21301.9
AT1G14840	TCV < Mock < NES	0	-3.13788	-1.52491	302.489	207.162	347.32	2363.16	2587.94	2592.48	763.531	800.161	902.46
AT3G28860	TCV < Mock < NES	0	-2.67847	-1.52606	374.183	470.58	802.821	3208.36	3239.35	4099.92	1527.06	1666.18	1551.83
AT3G16340	TCV < Mock < NES	0	-2.13393	-1.5268	232.76	258.953	364.401	1187.82	1014.37	1555.49	751.259	869.806	845.848
AT2G21340	TCV < Mock = NES	0	-1.67035	-1.52887	820.061	780.43	804.719	2695.57	2303.01	2657.07	2249.39	2094.48	2596.65
AT3G25680	TCV < Mock = NES	0	-1.40213	-1.529	383.022	417.896	449.808	1070.97	1147.96	1086.69	1300.9	1268.75	1039.83
AT2G28080	TCV < Mock < NES	0	-2.2879	-1.5291	187.583	99.1164	252.424	888.313	825.207	919.377	492.658	565.487	497.851
AT1G03055	TCV < Mock < NES	0	-3.6338	-1.52932	57.9444	51.7905	52.1929	644.396	786.193	579.787	149.025	146.103	172.333
AT1G77410	TCV < Mock = NES	0	-1.239	-1.53036	66.7834	59.827	91.1003	186.058	165.514	162.34	188.472	241.487	198.974
AT3G16000	TCV < Mock < NES	0	-3.14291	-1.53233	895.683	694.708	825.596	7091.75	8012.08	6236.85	2294.98	2199.12	2494.25
AT5G56790	TCV < Mock < NES	0	-2.62815	-1.5326	169.905	133.048	166.068	1058.49	902.053	939.255	428.665	500.384	427.919
AT1G47410	TCV < Mock < NES	0	-3.05473	-1.53384	41.2486	41.0753	45.5501	323.332	394.87	344.559	101.687	144.589	124.047
AT3G59550	TCV < Mock < NES	0	-2.86429	-1.53526	14.7316	20.5376	11.3875	111.181	102.855	125.897	30.6815	44.6637	59.942
AT3G19370	TCV < Mock < NES	0	-3.0378	-1.53572	369.273	399.144	502.001	3121.01	3467.53	3844.82	1094.89	1199.86	1388.66
AT2G31270	TCV < Mock < NES	0	-3.06939	-1.53606	62.8549	84.8293	72.1211	583.133	693.978	568.191	163.05	243.001	231.443
AT2G29290	TCV < Mock < NES	0	-2.77735	-1.53608	96.2466	73.2211	64.5294	534.349	594.669	475.425	263.861	231.645	183.156
AT4G39350	TCV < Mock < NES	0	-2.69455	-1.53673	1066.57	733.997	1235.55	6339.58	5963.25	7351.7	2404.55	2865.29	3539.07
AT5G06290	TCV < Mock < NES	0	-3.03371	-1.53705	1147.1	1120.64	1307.67	9153.14	10328.1	9798.4	3084.81	3198.37	4092.71
AT2G04790	TCV < Mock < NES	0	-3.1272	-1.53738	110.978	118.761	118.62	966.593	1292.19	785.198	283.147	354.281	373.805
AT1G70760	TCV < Mock < NES	0	-3.11722	-1.5387	859.345	955.446	733.547	7583.01	7316.92	7212.55	2497.48	2242.27	2664.09
AT3G01680	TCV < Mock < NES	0	-3.17214	-1.53986	155.173	98.2234	249.577	1346.65	1535.74	1651.57	517.203	479.945	465.383
AT1G18360	TCV < Mock < NES	0	-3.60258	-1.54058	161.066	117.868	195.486	1669.98	1651.6	2441.73	447.074	410.3	522.827
AT1G02810	TCV = NES < Mock	0	-3.48951	-1.5419	1.96422	2.67882	5.69377	32.9005	35.4674	48.0395	9.64276	11.3552	9.1578
AT2G03420	TCV < Mock < NES	0	-2.6107	-1.54194	448.824	465.2	466.889	2685.36	3337.48	2411.91	1254.4	1233.17	1533.52
AT5G13920	TCV < Mock = NES	0	-1.9773	-1.54422	25.5348	23.2164	31.3157	121.391	102.855	91.1094	67.4993	87.8133	78.2576
AT1G78210	TCV < Mock < NES	0	-3.37473	-1.54452	136.513	66.9705	237.24	1533.84	1557.02	1480.94	442.69	429.225	413.766
AT1G59980	TCV < NES < Mock	0	-1.06133	-1.54598	146.334	142.87	139.497	265.473	339.304	289.894	425.158	408.786	417.929
AT3G52960	TCV < Mock < NES	0	-3.26212	-1.54712	625.603	557.195	650.038	5494.38	6873.57	5216.43	1490.25	1730.53	2135.43
AT1G63850	TCV < Mock < NES	0	-1.8174	-1.54754	367.309	236.629	274.25	1018.78	1042.74	1033.68	852.946	900.843	813.379
AT5G22070	TCV < NES < Mock	0	-1.04778	-1.54772	527.392	525.942	533.316	1196.9	1029.74	1053.56	1527.06	1547.33	1564.32
AT5G49960	TCV < Mock < NES	0	-2.36426	-1.55033	112.942	106.26	107.233	478.759	604.127	598.009	284.9	298.262	372.972
AT3G27690	TCV < Mock < NES	0	-4.85923	-1.55121	961.484	414.324	2094.36	35016.3	32835.7	32870.6	3608.15	2928.12	3633.52
AT5G54270	TCV < Mock < NES	0	-3.0884	-1.55348	23291.7	16321.2	21027.1	160722	182942	172109	68642.4	57476.8	51873.1
AT2G28140	TCV < Mock < NES	0	-2.90218	-1.55375	14.7316	8.03646	23.724	115.719	144.234	87.7963	37.6944	52.2338	46.6215
AT3G15270	TCV < Mock < NES	0	-3.35823	-1.55407	40.2664	85.7223	50.2949	542.291	624.665	641.079	147.271	150.645	219.787
AT5G61130	TCV < Mock < NES	0	-2.80857	-1.55676	355.523	316.994	409.951	2126.05	2833.84	2623.95	990.575	1065.11	1128.91
AT5G38420	TCV < Mock < NES	0	-4.29336	-1.55707	6736.81	5088.33	6167.55	118750	124078	109970	16464.1	16215.1	20265.2
AT4G37930	TCV < Mock < NES	0	-3.35651	-1.5609	7172.34	9383.02	7092.54	86130	77064.7	79021.7	21905.7	20405.2	27459.3
AT3G56010	TCV < Mock < NES	0	-1.93202	-1.5619	999.786	957.232	871.146	3573.67	4036.19	3182.2	2719.26	2859.23	2771.48
AT1G12550	TCV < Mock < NES	0	-2.51334	-1.5629	44.1949	50.0047	54.0908	290.432	281.374	274.985	123.603	143.075	171.501
AT4G19985	TCV < Mock < NES	0	-2.57388	-1.56292	322.132	318.78	288.484	1851.5	2110.31	1572.05	877.491	956.862	911.618
AT5G13730	TCV < Mock < NES	0	-2.80189	-1.56322	266.151	147.335	223.006	1419.26	1528.64	1490.88	662.721	523.095	695.16
AT5G54690	TCV < Mock < NES	0	-2.14013	-1.56326	31.4275	40.1823	53.1418	182.654	186.795	180.562	99.9341	159.729	109.061
AT4G12980	TCV < Mock < NES	0	-3.65023	-1.56412	224.903	177.695	291.331	2883.9	2726.26	3102.69	652.201	689.637	710.146
AT2G47240	TCV < Mock < NES	0	-3.84602	-1.56607	300.525	100.009	592.152	5076.88	4959.52	4239.07	922.199	876.619	1140.56
AT2G18630	TCV < Mock = NES	0	-1.67848	-1.56843	529.356	266.989	521.929	1419.26	1430.52	1369.95	1195.7	1401.23	1312.9
AT5G13630	TCV < Mock < NES	0	-2.1711	-1.5731	31675	36548	34960.7	160334	136539	167832	112008	96113.2	98895.9
AT4G38620	TCV < Mock < NES	0	-3.24595	-1.57312	277.937	127.69	375.789	2333.66	2830.3	2249.57	669.734	839.526	815.877
AT1G22250	TCV < Mock < NES	0	-2.11936	-1.57392	69.7297	60.7199	103.437	348.291	292.015	376.033	226.167	235.431	234.773
AT3G52150	TCV < Mock < NES	0	-2.96074	-1.57625	1193.26	1460.85	1617.98	10308.1	13192.7	9758.65	4028.92	4344.49	4365.77
AT3G49840	TCV < Mock < NES	0	-2.22002	-1.5766	60.8907	74.114	64.5294	325.601	310.931	293.207	198.115	208.935	188.151
AT5G57590	TCV < Mock < NES	0	-1.94437	-1.5768	50.0875	30.36	61.6825	173.578	171.426	202.097	152.531	149.131	122.382
AT1G08160	TCV < Mock < NES	0	-2.67682	-1.57708	47.1412	19.6447	43.6522	232.572	268.37	205.41	102.564	127.935	99.0708
AT3G27360	TCV < Mock < NES	0	-2.66905	-1.57737	96.8496	112.26	78.2855	585.272	737.149	505.603	301.184	291.988	264.547
AT1G29980	TCV < Mock < NES	0	-3.10825	-1.5782	25.5348	23.2164	51.2439	309.718	286.103	266.702	91.1679	106.739	100.736
AT4G26650	TCV < Mock = NES	0	-1.48382	-1.57865	741.492	778.644	942.319	2161.22	2622.22	2103.8	2049.53	2570.81	2734.85
AT5G56590	TCV < Mock < NES	0	-1.94512	-1.57881	136.513	102.688	188.843	492.373	607.674	548.313	379.574	467.076	432.082
AT5G50420	TCV < Mock < NES	0	-2.19839	-1.57997	148.298	134.834	206.874	695.448	801.562	752.067	423.405	457.992	583.602
AT2G44830	TCV < Mock = NES	0	-1.53876	-1.58162	67.7655	65.1846	163.221	289.297	281.374	289.894	259.478	315.674	311.365
AT3G01510	TCV < Mock = NES	0	-1.65471	-1.58205	402.664	456.293	372.942	1139.04	1280.37	1459.41	1222	1231.66	1234.64
AT4G14740	TCV < Mock < NES	0	-2.89876	-1.58269	208.207	183.053	292.28	1447.62	1950.7	1699.6	650.448	750.955	646.041
AT3G05180	TCV < Mock < NES	0	-3.2853	-1.58293	148.298	178.588	195.486	1549.73	1692.98	1850.35	468.112	504.927	591.927
AT4G09970	TCV < Mock < NES	0	-2.37073	-1.58457	174.815	200.019	205.925	940.5	1137.32	926.003	561.91	506.441	673.515
AT5G35750	TCV < Mock = NES	0	-1.78045	-1.58558	461.591	312.529	566.53	1539.52	1548.74	1517.39	1292.13	1434.54	1297.08
AT3G46940	TCV < Mock < NES	0	-3.54352	-1.58674	21.6064	57.1482	29.4178	391.402	469.351	400.881	112.207	103.711	109.061
AT2G28950	TCV < Mock < NES	0	-3.89534	-1.58854	403.647	198.233	867.351	6542.66	8008.53	7311.94	1261.45	1382.3	1774.95
AT1G53300	TCV < Mock < NES	0	-2.35837	-1.58857	722.832	483.081	827.494	3403.5	3352.85	3670.88	1862.81	1984.13	2268.64
AT1G58170	TCV < Mock < NES	0	-2.58046	-1.59048	46.1591	34.8247	66.4273	239.379	306.202	336.277	115.713	139.29	188.984
AT3G27400	TCV < Mock < NES	0	-4.22452	-1.59124	11.7853	15.18	9.48961	276.818	199.799	205.41	21.0388	43.9067	44.9565
AT5G48830	TCV < Mock < NES	0	-2.2497	-1.59304	305.436	289.313	360.605	1362.53	1625.59	1555.49	913.433	1036.35	932.431
AT5G16290	TCV < Mock < NES	0	-2.42373	-1.59344	343.738	316.101	404.257	1777.76	2041.74	1890.11	1184.31	1155.2	871.656
AT1G19710	TCV < Mock = NES	0	-1.49409	-1.59477	414.45	344.675	441.267	1169.67	1093.58	1118.16	1023.89	1190.78	1411.13
ATCG00430	TCV < Mock < NES	0	-2.85983	-1.595	7.85687	12.5012	10.4386	89.6254	66.2057	67.9179	31.5581	25.7384	35.7987
AT4G39460	TCV < Mock = NES	0	-1.31991	-1.59571	626.585	554.516	776.25	1436.28	1714.26	1736.05	1889.1	2245.3	1781.61
AT2G17972	TCV < Mock < NES	0	-2.99789	-1.59627	207.225	174.123	215.414	1471.45	1867.95	1427.93	598.728	615.45	590.262
AT1G58290	TCV < Mock < NES	0	-2.12013	-1.59665	11209.8	10672.4	11288.8	47713.6	50523.3	45968.8	38200.2	33896.7	28226
AT4G34650	TCV < Mock < NES	0	-3.31352	-1.59769	40.2664	184.839	111.977	1013.11	1322.93	1015.46	351.523	331.571	337.174
AT3G48187	TCV < Mock < NES	0	-3.05153	-1.59778	29.4633	21.4306	40.8053	267.742	229.356	263.389	82.4018	96.1404	99.0708
AT2G17650	TCV < Mock = NES	0	-1.38993	-1.59782	110.978	124.119	97.743	274.549	297.926	299.833	373.438	336.87	297.212
AT4G19975	TCV < Mock = NES	0	-1.42782	-1.60005	18.6601	35.7176	24.673	81.6839	69.7525	61.2918	73.6356	87.8133	78.2576
AT1G60810	TCV < Mock < NES	0	-3.0484	-1.6006	60.8907	53.5764	82.5596	532.08	558.103	540.03	155.161	221.804	220.62
AT2G13820	TCV < Mock < NES	0	-2.94021	-1.60076	25.5348	28.5741	40.8053	186.058	282.557	260.076	81.5252	100.683	105.731
AT2G30070	TCV < Mock < NES	0	-2.10084	-1.60134	280.883	191.089	291.331	988.149	1176.33	1109.88	690.772	790.32	835.025
AT5G10310	TCV < Mock < NES	0	-2.73032	-1.60267	30.4454	22.3235	37.9585	228.034	206.893	167.31	60.4864	105.225	109.894
AT4G25080	TCV < Mock = NES	0	-1.28947	-1.60394	2615.35	1951.97	2551.76	5490.98	6927.96	4982.86	8240.18	7515.61	5884.3
AT4G37590	TCV < Mock < NES	0	-1.86541	-1.60424	673.726	718.817	945.165	2962.18	2721.53	2834.33	2154.72	2569.3	2383.53
AT4G01900	TCV < Mock < NES	0	-3.0857	-1.60498	183.654	250.023	223.955	1878.73	1918.78	1785.74	556.65	564.73	879.149
AT4G34610	TCV < Mock < NES	0	-2.88173	-1.60682	372.219	395.573	658.579	3185.67	3661.41	3665.91	1371.9	1405.77	1566.82
AT4G37970	TCV < Mock = NES	0	-1.17308	-1.60742	23.5706	25.0023	37.9585	61.263	54.3833	79.5137	83.2784	85.5423	94.9081
AT1G73110	TCV < Mock < NES	0	-3.34334	-1.6086	360.434	294.67	356.809	3545.31	3828.11	2897.28	938.854	1026.51	1120.58
AT2G34680	TCV < Mock < NES	0	-2.62885	-1.61486	595.158	624.165	979.328	4314.5	4302.19	4982.86	2097.74	2336.14	2300.27
AT3G52900	TCV < Mock < NES	0	-3.34453	-1.61557	53.0339	65.1846	86.3555	638.723	763.731	675.866	174.446	246.029	206.467
AT3G26300	TCV < Mock = NES	0	-1.22047	-1.61701	854.434	761.678	666.171	1704.02	1755.63	1858.63	2664.91	2420.17	1915.65
AT5G13100	TCV < Mock < NES	0	-2.62511	-1.61703	926.128	464.329	1097.95	4825.02	6070.83	4456.08	2526.4	2846.36	2260.31
AT1G06190	TCV < Mock = NES	0	-1.33961	-1.61974	1062.64	1131.36	1127.37	2790.87	3065.56	2549.41	3776.46	3626.84	2803.95
AT3G24630	TCV < Mock < NES	0	-2.4212	-1.62029	60.8907	37.5035	92.0492	401.613	320.388	298.176	182.336	214.234	188.984
AT2G15280	TCV < Mock < NES	0	-2.15643	-1.62267	281.865	365.213	330.239	1412.45	1665.78	1278.84	904.666	947.778	1157.21
AT1G62680	TCV < Mock = NES	0	-1.46638	-1.62348	89.3719	84.8293	90.1513	265.473	228.173	236.884	270.874	299.776	243.931
AT4G34830	TCV < Mock < NES	0	-2.4775	-1.62381	1754.05	1479.6	1613.23	8776.49	8533.45	9684.1	4751.25	5145.41	5040.95
AT5G48600	TCV < Mock < NES	0	-2.83323	-1.62451	70.7118	91.9729	77.8148	580.864	589.94	543.343	218.277	253.599	269.739
AT5G48740	TCV < Mock < NES	0	-2.50942	-1.62662	7.85687	28.5741	32.2647	144.081	106.402	140.805	62.2396	74.1871	75.76
AT3G03900	TCV < Mock < NES	0	-2.06878	-1.62781	152.227	160.729	187.894	738.559	670.333	692.432	532.105	516.282	499.517
AT2G35155	TCV < Mock < NES	0	-1.86172	-1.62784	336.863	229.486	324.545	1033.53	1074.66	1129.76	838.044	954.591	960.737
AT1G54217	TCV < Mock < NES	0	-2.38594	-1.62837	8.83898	15.18	18.0303	85.0874	76.846	57.9787	41.2009	43.9067	44.9565
AT2G28460	TCV < Mock = NES	0	-1.75419	-1.62879	40.2664	26.7882	88.2534	171.309	198.617	154.058	163.05	174.113	143.195
AT5G05350	TCV < Mock = NES	0	-1.37542	-1.62903	27.499	16.0729	29.4178	68.0699	65.0235	56.3222	74.5123	85.5423	65.7697
AT2G21830	TCV < Mock = NES	0	-1.85386	-1.62936	98.2109	116.082	133.804	314.256	458.711	485.365	333.99	371.693	371.307
AT5G41180	TCV < Mock = NES	0	-1.85361	-1.63012	212.135	166.087	244.832	659.144	807.474	785.198	636.422	707.806	584.434
AT5G64580	TCV < Mock < NES	0	-2.35723	-1.6317	572.569	608.092	633.906	3150.5	3080.93	3066.25	1858.42	1962.17	1802.42
AT4G37925	TCV < Mock < NES	0	-3.72014	-1.63277	681.583	767.929	608.284	9445.84	8951.96	8721.66	1940.83	1786.55	2654.1
AT3G51080	TCV < Mock < NES	0	-4.74301	-1.63384	39.2843	8.9294	47.4481	830.453	868.95	863.055	75.3889	99.1685	122.382
AT1G29170	TCV < Mock < NES	0	-3.11784	-1.63419	209.189	152.693	271.403	1662.04	1620.86	2214.79	591.715	788.049	586.099
AT5G15790	TCV < Mock < NES	0	-2.33148	-1.63447	92.3182	72.3282	82.5596	409.554	384.23	450.577	228.796	257.384	281.394
AT4G31840	TCV < Mock < NES	0	-3.19079	-1.63547	35.3559	24.1094	36.0605	298.373	257.729	316.398	84.155	104.468	108.229
AT5G17670	TCV < Mock < NES	0	-2.48876	-1.6374	346.684	348.247	405.206	2020.54	2229.71	1924.89	1091.39	1158.23	1173.03
AT3G58800	TCV < Mock < NES	0	-2.12868	-1.6376	70.7118	83.0435	107.233	392.537	379.501	369.407	238.439	308.104	265.576
AT4G02530	TCV < Mock < NES	0	-3.2979	-1.63808	962.466	806.325	1004	8579.08	10239.4	8451.64	2739.42	2653.32	3237.7
AT2G38720	TCV < Mock < NES	0	-2.34626	-1.6386	11.7853	24.1094	14.2344	71.4734	95.7619	87.7963	42.0775	58.2899	55.7793
AT1G26560	TCV < Mock < NES	0	-3.49409	-1.63985	516.589	500.047	911.003	6774.09	8079.46	6866.34	1832.12	2036.36	2138.76
AT4G34090	TCV < Mock < NES	0	-2.74815	-1.63991	509.714	328.602	462.144	2830.58	3254.72	2652.11	1270.21	1339.91	1442.77
AT4G01150	TCV < Mock < NES	0	-2.83463	-1.6404	6481.92	4851.34	4528.44	35593.8	40717.7	36839.7	17305.3	16070.6	16073.6
AT1G44900	TCV < Mock < NES	0	-2.66972	-1.64077	76.6045	199.126	99.6409	800.956	790.922	796.793	341.003	413.328	416.264
AT1G32470	TCV < Mock < NES	0	-3.76617	-1.64413	1456.47	815.255	1625.57	16583	19951.6	16492.5	3788.73	3822.15	4570.58
AT5G01890	TCV < Mock < NES	0	-2.4516	-1.64534	119.817	129.476	262.862	824.781	840.576	1136.38	460.223	561.702	580.272
AT1G51100	TCV < Mock < NES	0	-2.97568	-1.64541	212.135	233.057	209.72	1652.97	2084.3	1414.68	727.59	650.273	671.017
AT2G32960	TCV < Mock = NES	0	-1.84115	-1.64754	212.135	198.233	182.201	549.098	911.511	662.614	536.488	670.712	649.371
AT5G39790	TCV < Mock < NES	0	-2.46208	-1.64834	51.0696	62.5058	94.8961	464.01	320.388	364.438	214.771	241.487	197.309
AT2G26270	TCV < Mock < NES	0	-2.28526	-1.64923	25.5348	42.8611	57.8866	212.151	224.627	178.906	117.466	152.159	126.544
AT5G42760	TCV < Mock < NES	0	-2.73534	-1.65188	495.965	496.475	673.762	4083.06	3335.11	3677.51	1829.5	1437.56	1968.93
AT2G24120	TCV < NES < Mock	0	-1.18855	-1.65409	676.673	623.272	911.003	1684.73	1585.39	1769.18	2500.11	2535.23	1923.14
AT2G41720	TCV < Mock = NES	0	-1.3888	-1.65419	737.563	701.851	654.783	1817.47	1885.68	1780.77	2275.69	2495.87	1819.91
AT5G40380	TCV < Mock < NES	0	-3.20826	-1.65487	178.744	99.1164	594.05	2038.69	3414.32	2605.73	812.622	1002.28	930.766
AT5G39980	TCV < Mock < NES	0	-2.42901	-1.65495	46.1591	81.2576	65.4783	366.443	375.954	296.52	221.784	205.907	179.826
AT4G14200	TCV < Mock < NES	0	-2.45189	-1.65625	75.6224	47.3258	204.976	593.343	586.394	614.574	263.861	436.796	333.011
AT3G49330	TCV < Mock < NES	0	-2.85878	-1.6568	9.82109	11.6082	16.1323	85.0874	106.402	81.1702	38.5711	41.6356	38.2963
AT5G26660	TCV < Mock < NES	0	-4.07716	-1.65719	22.5885	38.3964	35.1116	710.196	546.197	366.094	87.6615	93.1124	122.382
AT4G27720	TCV < Mock < NES	0	-2.89329	-1.65782	542.124	363.427	784.791	4211.26	5016.27	3331.29	1365.77	1792.6	2175.39
AT4G05090	TCV < Mock < NES	0	-3.26909	-1.65784	165.976	168.766	153.732	1625.74	1620.86	1462.72	508.437	486.001	546.971
AT4G21445	TCV < Mock < NES	0	-3.54777	-1.65823	188.565	118.761	212.567	2112.44	2327.84	1639.97	452.333	544.291	644.376
AT5G59480	TCV < Mock < NES	0	-2.9892	-1.65897	684.53	792.931	859.759	6215.92	6768.35	5574.24	2294.1	2404.27	2682.4
AT2G27740	TCV < Mock < NES	0	-3.13308	-1.65926	14.7316	20.5376	31.3157	203.075	197.435	183.875	57.8566	73.4301	79.0901
AT2G38120	TCV < Mock < NES	0	-2.38158	-1.66109	422.307	300.028	565.581	2169.16	2340.85	2201.53	1302.65	1386.84	1383.66
AT5G14740	TCV < Mock < NES	0	-3.53325	-1.66211	8492.29	4180.75	6595.28	64706.2	88933.2	69440.3	22135.4	21642.2	17202.5
AT1G12800	TCV < Mock < NES	0	-2.85402	-1.66293	1800.2	1862.67	1996.61	12950.3	14489.6	13479.2	6075.82	6172.67	5672.84
AT5G04840	TCV < Mock < NES	0	-3.24608	-1.66392	37.3201	24.1094	45.5501	283.625	377.136	354.498	91.1679	110.524	137.367
AT4G27430	TCV < Mock < NES	0	-3.30395	-1.66403	933.985	623.272	1152.99	8601.77	8428.23	9737.11	2732.41	2674.52	3181.92
AT1G04020	TCV < Mock < NES	0	-2.89872	-1.6644	37.3201	113.403	32.2647	458.338	374.772	531.748	167.433	177.898	234.773
AT1G75060	TCV < Mock < NES	0	-2.89023	-1.66475	10.8032	10.7153	16.1323	95.2979	94.5796	89.4529	37.6944	31.7945	49.9517
AT5G60490	TCV < Mock < NES	0	-4.07035	-1.66539	6.87476	5.35764	24.673	166.771	231.72	221.976	36.8178	46.1777	34.1336
AT3G09035	TCV < Mock = NES	0	-1.83668	-1.66605	144.37	135.727	155.63	457.203	559.202	540.03	389.217	446.637	546.971
AT4G34740	TCV < Mock = NES	0	-1.74945	-1.66618	627.567	512.548	574.122	1748.26	2072.48	1943.12	2079.33	1907.67	1453.59
AT1G06900	TCV < Mock = NES	0	-1.35735	-1.66653	938.896	809.004	1041.01	2275.81	2424.79	2445.05	3161.07	3392.92	2299.44
AT1G26500	TCV < Mock = NES	0	-1.88625	-1.66879	42.2307	52.6835	34.1626	191.73	143.052	142.462	153.408	143.832	113.224
AT4G30845	TCV < Mock = NES	0	-1.81982	-1.6691	74.6402	45.54	90.1513	230.303	308.566	203.754	186.719	223.318	258.916
AT3G09450	TCV < Mock < NES	0	-3.53295	-1.67011	95.2645	118.761	142.344	1414.72	1357.22	1353.39	443.567	271.01	419.594
AT2G19090	TCV < Mock = NES	0	-1.82285	-1.67085	67.7655	52.6835	86.3555	232.572	225.809	273.328	190.225	237.702	230.61
AT1G63470	TCV < Mock < NES	0	-3.52239	-1.67093	48.1233	30.36	55.9887	513.928	554.473	477.082	121.849	141.561	164.84
AT3G46780	TCV < Mock < NES	0	-2.32387	-1.67426	6015.41	3862.86	4809.34	22863.6	25696.1	24977.2	18942.8	15384	12549.5
AT5G18920	TCV < Mock = NES	0	-1.37888	-1.67587	53.0339	50.0047	47.4481	123.66	158.421	109.331	152.531	180.169	148.19
AT4G27370	TCV < Mock < NES	0	-4.28945	-1.67741	18.6601	25.8953	13.2855	323.332	400.781	407.508	54.3501	66.617	64.1046
AT4G00880	TCV < Mock = NES	0	-1.89988	-1.67771	562.716	673.266	369.146	2401.73	1580.66	2007.72	1705.89	1501.15	1928.13
AT5G10620	TCV < Mock < NES	0	-3.03865	-1.67787	25.5348	18.7517	24.673	186.058	223.444	157.371	63.1163	64.346	93.2431
AT3G20570	TCV < Mock < NES	0	-2.86486	-1.67801	63.8371	19.6447	58.8356	358.502	340.487	337.933	148.148	157.458	149.855
AT3G58820	TCV < Mock = NES	0	-2.08586	-1.67809	39.2843	23.2164	31.3157	138.409	132.411	127.553	98.1809	110.524	91.578
AT4G24972	TCV < Mock < NES	0	-2.76044	-1.67827	192.493	205.376	145.191	1217.32	1306.38	1156.26	653.955	548.833	535.315
AT2G35370	TCV < Mock < NES	0	-3.20446	-1.67928	2656.6	2130.56	2176.92	21050.6	22771.2	20373.7	7004.15	6523.17	8776.51
AT1G62030	TCV < Mock < NES	0	-2.42973	-1.68031	132.585	126.798	122.416	724.945	618.314	713.967	423.405	439.824	360.484
AT3G52770	TCV < Mock = NES	0	-1.93306	-1.68214	49.1054	59.827	34.1626	164.502	208.075	173.936	145.518	151.402	162.343
AT1G63240	TCV < Mock < NES	0	-2.91141	-1.68224	55.9802	53.5764	81.6107	401.613	466.987	569.848	194.608	223.318	195.644
AT5G59900	TCV < Mock = NES	0	-1.76695	-1.68244	68.7476	50.8976	70.2231	233.707	193.888	218.663	200.745	217.262	191.481
AT3G13677	TCV < Mock = NES	0	-1.57905	-1.6842	23.5706	33.0388	18.9792	61.263	85.1217	79.5137	81.5252	92.3554	69.0998
AT1G05850	TCV < Mock < NES	0	-3.40546	-1.68573	1679.41	1521.57	3714.23	23063.2	25745.8	24465.4	6415.94	6408.86	9421.71
AT5G51820	TCV < Mock < NES	0	-2.97066	-1.68576	768.991	755.428	834.137	5876.71	6241.07	6371.03	2426.47	2498.89	2662.42
AT5G25500	TCV < NES < Mock	0	-1.03635	-1.6878	26.5169	44.647	46.4991	76.0114	79.2104	86.1398	127.986	127.935	123.214
ATCG00630	TCV < Mock < NES	0	-2.78412	-1.68822	8.83898	18.7517	4.74481	64.6665	88.6684	69.5745	38.5711	25.7384	39.9613
AT2G01505	TCV < Mock < NES	0	-2.26689	-1.68852	84.2492	94.4508	84.7755	399.082	412.878	456.223	259.22	270.726	319.373
AT3G29230	TCV < Mock < NES	0	-3.02369	-1.68857	177.762	147.335	166.068	1268.37	1376.13	1350.08	496.164	569.273	517.832
AT4G28760	TCV < NES < Mock	0	-1.15497	-1.69355	1184.42	857.223	1140.65	2346.14	2326.66	2413.57	3506.46	3621.54	3165.27
AT2G37090	TCV < Mock < NES	0	-2.78783	-1.69503	50.0875	40.1823	59.7846	353.964	301.473	381.003	157.791	165.785	162.343
AT3G13510	TCV < Mock < NES	0	-3.24834	-1.69898	286.776	177.695	378.636	2279.21	3036.01	2696.84	842.427	975.031	919.943
AT5G60020	TCV < Mock < NES	0	-3.45561	-1.70021	56.9623	47.3258	101.539	684.103	696.343	877.963	211.264	219.533	238.103
AT3G29375	TCV < NES < Mock	0	-1.26955	-1.70078	207.225	204.483	187.894	453.8	554.473	437.325	645.188	714.619	589.43
AT5G24750	TCV < Mock < NES	0	-2.73636	-1.70094	17.678	41.0753	29.4178	230.303	178.519	178.906	75.3889	101.44	109.894
AT2G24190	TCV < Mock = NES	0	-1.67332	-1.70231	139.459	94.6517	148.038	441.32	312.113	465.486	403.243	446.637	393.786
AT3G26932	TCV < Mock < NES	0	-2.61833	-1.70314	74.6402	80.3646	101.539	493.507	598.216	483.708	239.316	308.861	287.222
AT4G16340	TCV < Mock = NES	0	-1.84638	-1.70445	680.601	680.421	1120.72	2619.56	2766.45	3538.36	2478.19	2975.05	2634.95
AT4G24930	TCV < Mock < NES	0	-3.3927	-1.70531	336.863	249.13	333.085	3071.09	3681.51	2900.59	961.646	1009.85	1025.67
AT2G47780	TCV < Mock < NES	0	-2.25742	-1.70735	8.83898	40.1823	43.6522	163.368	124.136	155.714	108.7	108.253	85.7503
AT4G37080	TCV < Mock < NES	0	-3.26899	-1.70808	311.328	241.094	344.473	2309.84	3646.04	2690.21	730.22	1094.64	1105.6
AT3G51720	TCV < Mock < NES	0	-2.95563	-1.70869	69.7297	55.3623	59.7846	477.624	526.099	430.699	160.421	239.973	203.969
AT5G43880	TCV < Mock < NES	0	-3.3318	-1.70895	268.116	204.483	367.248	2768.18	2895.32	2792.92	895.024	943.236	907.455
AT4G34260	TCV < Mock < NES	0	-2.2416	-1.70905	700.243	287.527	1060.94	3094.91	3627.13	2966.85	2039.88	2558.7	2099.63
AT2G38540	TCV < Mock < NES	0	-3.19571	-1.71113	1312.1	223.235	4185.87	15021.9	20766.1	16631.6	5835.62	6476.23	6420.45
AT4G01883	TCV < Mock < NES	0	-3.34138	-1.71185	220.974	209.841	186.945	2156.68	2316.02	1789.06	572.429	615.45	835.858
AT3G59970	TCV < Mock < NES	0	-2.60569	-1.71304	2440.54	2162.7	2969.12	15636.7	16210.7	14244.4	7355.67	8538.33	8932.1
AT2G03480	TCV < Mock < NES	0	-2.52251	-1.71336	114.907	82.1505	176.507	704.524	658.511	783.541	354.152	433.01	437.909
AT1G14150	TCV < Mock < NES	0	-4.48879	-1.71521	110.978	108.046	131.906	2626.37	2682.51	2570.94	328.731	339.898	483.699
AT5G52060	TCV < Mock < NES	0	-3.30343	-1.71525	1201.12	984.02	1446.22	12402.3	11659.3	11789.6	3770.32	3809.28	4344.13
AT1G47740	TCV < Mock = NES	0	-1.84569	-1.71603	367.309	408.074	515.286	1419.26	1710.71	1509.1	1283.36	1495.85	1461.09
AT4G21880	TCV < Mock = NES	0	-1.55342	-1.7172	79.5508	56.2552	64.5294	199.672	212.804	175.593	238.439	243.001	177.328
AT2G26730	TCV < Mock < NES	0	-2.87079	-1.71968	592.211	440.22	697.487	4152.27	4128.4	4373.25	1683.1	2050.74	1963.93
AT3G49750	TCV < Mock < NES	0	-2.32779	-1.72051	10.8032	17.8588	18.0303	86.2219	80.3927	67.9179	46.4606	57.5329	49.9517
AT1G24030	TCV < Mock < NES	0	-3.08936	-1.72053	8.83898	9.82234	19.9282	114.584	98.1264	115.957	43.8307	40.1216	43.2914
AT2G37860	TCV < NES < Mock	0	-1.14544	-1.72229	656.048	1011.7	968.889	1879.87	1923.51	2029.26	3069.9	3208.21	2421.82
AT1G10030	TCV < Mock < NES	0	-2.61326	-1.72602	60.8907	44.647	76.8659	356.233	388.959	371.064	186.719	211.963	204.802
AT1G67630	TCV < Mock < NES	0	-2.36214	-1.72922	44.1949	77.6858	53.1418	302.911	287.286	309.772	223.537	195.309	161.51
AT5G59250	TCV < Mock < NES	0	-2.8095	-1.73138	618.728	659.883	580.764	4312.23	4621.4	4101.58	2096.86	1916.75	2160.41
AT2G02170	TCV < Mock < NES	0	-2.12477	-1.7323	114.907	73.2211	167.017	464.01	602.945	482.052	378.698	420.898	380.465
AT1G60660	TCV < Mock = NES	0	-1.76166	-1.73254	227.849	225.021	241.036	612.63	1029.74	710.653	811.745	794.105	700.156
AT1G32990	TCV < Mock < NES	0	-3.69105	-1.73397	686.494	564.338	777.199	8594.97	9642.39	7956.34	2036.38	2159.75	2550.03
AT1G14030	TCV < Mock < NES	0	-2.1465	-1.73445	307.4	250.916	350.167	1278.58	1501.45	1242.4	1014.24	1093.88	914.948
AT2G35350	TCV < Mock = NES	0	-2.14003	-1.73467	26.5169	29.467	31.3157	138.409	120.589	125.897	89.4147	102.954	98.2383
AT5G23310	TCV < Mock = NES	0	-1.73402	-1.73472	361.416	350.926	371.044	1084.58	1346.58	1172.83	1089.63	1324.77	1191.35
AT3G24770	TCV < Mock < NES	0	-2.70353	-1.73536	187.583	141.978	238.189	1162.86	1248.45	1287.13	486.521	697.964	705.983
AT1G03457	TCV < Mock < NES	0	-4.28676	-1.73561	13.7495	4.4647	37.9585	280.221	487.085	329.65	51.7203	77.9722	57.4444
AT5G65880	TCV < Mock = NES	0	-1.76818	-1.73613	74.6402	80.3646	84.4576	257.531	334.575	223.632	265.614	298.262	233.94
AT1G16000	TCV < NES < Mock	0	-1.18204	-1.73688	102.139	95.5446	160.374	262.069	341.669	208.723	397.983	445.88	349.662
AT5G49030	TCV < Mock < NES	0	-2.8726	-1.73809	806.311	788.466	956.553	6551.73	6107.48	6026.47	2690.33	3031.83	2788.97
AT5G53580	TCV < Mock < NES	0	-2.03724	-1.73887	1069.52	859.009	806.617	3802.84	3936.88	3487.01	2920.88	2919.04	3289.32
AT3G15850	TCV < Mock < NES	0	-3.6709	-1.74126	1199.15	890.262	1292.49	12625.8	17509.1	12939.2	3673.02	3669.99	3963.66
AT5G63650	TCV < Mock < NES	0	-2.56199	-1.74197	16.6958	18.7517	30.3668	130.467	107.584	150.745	51.7203	88.5703	79.9226
AT4G24540	TCV < Mock < NES	0	-2.79611	-1.74283	225.885	159.836	445.063	1760.74	2235.63	1774.15	803.856	897.815	1078.96
AT5G52970	TCV < Mock < NES	0	-3.29984	-1.7447	298.561	217.877	274.25	2557.16	2894.14	2335.71	845.057	844.068	960.737
AT3G56810	TCV < Mock < NES	0	-2.36069	-1.74583	44.1949	52.6835	58.8356	258.666	261.276	279.954	139.382	208.935	173.998
AT4G22010	TCV < Mock < NES	0	-3.90862	-1.74583	122.764	55.3623	416.594	2427.83	3871.85	2632.23	561.91	692.665	740.117
AT1G10120	TCV < Mock = NES	0	-1.46173	-1.74689	370.255	310.743	546.602	992.687	1222.44	1166.2	1207.98	1375.49	1536.85
AT4G37110	TCV < Mock < NES	0	-2.97337	-1.74759	41.2486	23.2164	92.0492	352.829	507.183	369.407	149.901	189.253	186.486
AT3G14890	TCV < Mock < NES	0	-2.29934	-1.74821	66.7834	123.226	100.59	469.683	487.085	473.769	347.139	377.749	251.423
AT2G36200	TCV < Mock < NES	0	-2.60568	-1.74828	43.2128	41.9682	65.4783	319.929	332.211	265.046	138.505	194.552	173.166
AT4G36250	TCV < Mock < NES	0	-3.14118	-1.74838	732.653	291.991	1354.17	6456.43	6966.97	7563.74	2389.65	2830.47	2772.32
AT5G47500	TCV < Mock < NES	0	-5.0556	-1.74904	5.89265	4.4647	11.3875	259.8	234.085	230.258	28.0517	15.1402	29.971
AT3G51710	TCV < Mock = NES	0	-2.00953	-1.74998	11.7853	23.2164	25.622	76.0114	88.6684	79.5137	63.1163	73.4301	67.4347
AT1G26960	TCV < Mock = NES	0	-1.86756	-1.75183	136.513	106.26	138.548	418.63	452.8	520.152	369.931	489.786	424.589
AT4G05010	TCV < Mock < NES	0	-2.32209	-1.75263	239.634	222.342	213.516	1351.19	968.259	1058.53	753.889	745.656	776.748
AT5G41620	TCV < Mock < NES	0	-3.06964	-1.75348	29.4633	32.1459	23.724	264.338	193.888	258.419	98.1809	85.5423	104.066
AT5G60890	TCV < Mock = NES	0	-2.24204	-1.75358	366.326	277.704	318.851	1968.36	1389.14	1197.67	1030.02	1170.34	1046.49
AT1G20020	TCV < Mock < NES	0	-3.36281	-1.75371	2579.02	1792.13	2314.52	24370.2	24304.6	20103.7	6699.97	6899.4	8946.34
AT5G10240	TCV < Mock = NES	0	-2.18781	-1.7539	174.815	138.406	215.414	831.588	813.385	763.663	683.76	672.983	426.254
AT4G18480	TCV < Mock < NES	0	-2.91902	-1.75485	3157.48	3668.2	3364.07	24077.5	30311.6	22679.6	10820.9	11636.8	11931.8
AT4G15510	TCV < Mock < NES	0	-3.05644	-1.75766	208.207	191.089	262.862	1723.3	2133.95	1651.57	648.695	789.563	800.891
AT3G50070	TCV < Mock = NES	0	-2.09628	-1.75805	62.8549	60.7199	93.9472	319.929	295.561	314.742	200.745	286.15	248.926
AT4G19100	TCV < Mock < NES	0	-3.01317	-1.75975	161.066	128.583	150.885	1195.76	1406.87	954.164	504.93	504.927	482.033
AT1G48650	TCV < NES < Mock	0	-1.22761	-1.75997	1984.84	2386.83	2260.43	5184.66	4344.75	6001.63	7864.99	7721.52	6875.84
AT4G20270	TCV < Mock < NES	0	-2.6104	-1.76056	266.151	230.379	362.503	1691.54	1611.4	1943.12	771.421	1112.81	1026.51
AT4G10150	TCV < Mock < NES	0	-3.03364	-1.76149	3.92843	6.25058	9.48961	51.0525	63.8413	46.383	21.0388	25.7384	19.9807
AT1G61350	TCV < Mock < NES	0	-2.9677	-1.76225	242.581	200.019	286.586	1803.85	1962.53	1938.15	742.493	856.18	874.986
AT2G22122	TCV < Mock < NES	0	-3.06999	-1.763	13.7495	2.67882	6.64273	66.9354	59.1123	67.9179	26.2984	28.7664	23.3108
AT1G65710	TCV < Mock < NES	0	-2.90187	-1.76465	1.96422	8.9294	14.2344	68.0699	60.2945	59.6353	21.0388	38.6076	25.8084
AT3G26490	TCV < Mock < NES	0	-3.26143	-1.76485	44.1949	52.6835	43.6522	454.934	503.637	389.286	149.901	152.916	174.831
AT3G29280	TCV < Mock < NES	0	-3.40701	-1.76529	25.5348	8.9294	19.9282	175.847	217.533	183.875	50.8437	82.5142	51.6167
AT3G17380	TCV < Mock = NES	0	-1.60259	-1.76681	74.6402	69.6493	117.671	287.028	260.094	248.48	240.192	322.487	328.848
AT1G28390	TCV < Mock = NES	0	-1.85066	-1.76715	3.92843	25.8953	32.2647	66.9354	70.9347	86.1398	75.3889	71.9161	64.1046
AT3G12930	TCV < Mock < NES	0	-2.30525	-1.76726	376.892	358.962	452.655	1837.89	2316.99	1719.48	1240.41	1478.44	1326.97
AT3G42660	TCV < Mock < NES	0	-2.47207	-1.76918	69.7297	91.9729	98.692	509.39	504.819	430.699	307.692	303.562	276.399
AT4G22120	TCV < Mock = NES	0	-2.05944	-1.76935	175.797	117.868	239.138	812.301	704.618	704.027	512.82	652.544	651.037
AT5G13980	TCV < NES < Mock	0	-1.1162	-1.76997	1915.11	1682.3	2204.44	4295.21	3891.95	4389.82	6727.14	7193.12	5866.82
AT5G44050	TCV < Mock < NES	0	-5.17754	-1.7701	4.91054	11.6082	50.2949	1032.39	656.146	730.532	78.0187	40.8786	109.061
AT1G02720	TCV < Mock < NES	0	-2.3555	-1.77045	89.3719	80.3646	107.233	417.496	562.749	437.325	254.218	319.459	371.307
AT1G78320	TCV < Mock < NES	0	-3.3916	-1.77073	15.7137	22.3235	20.8771	216.689	208.075	193.815	52.5969	63.589	84.9178
AT5G39530	TCV < Mock < NES	0	-3.16218	-1.77302	712.029	625.058	688.946	5914.14	6910.22	5312.51	2280.95	2324.02	2319.42
AT3G06150	TCV < Mock < NES	0	-3.08875	-1.77324	139.459	83.9364	330.239	1402.24	1726.08	1581.99	521.586	595.011	775.916
AT4G14480	TCV < Mock < NES	0	-3.13204	-1.7743	40.2664	66.0776	18.9792	374.385	386.594	337.933	120.096	135.505	173.166
AT5G12250	TCV < Mock < NES	0	-2.56556	-1.7782	977.198	765.25	1590.46	5740.57	7105.29	6884.56	3626.56	3792.52	4012.78
AT5G52570	TCV < Mock < NES	0	-4.25226	-1.78305	344.72	510.762	536.163	7676.02	9731.06	9114.25	1837.38	1336.12	1615.94
AT1G18370	TCV < Mock < NES	0	-3.21795	-1.78391	19.6422	18.7517	50.2949	307.449	286.103	231.915	84.155	109.767	111.559
AT1G23480	TCV < Mock < NES	0	-2.80446	-1.78865	138.477	338.424	355.86	1646.16	2203.71	1967.96	796.843	1136.27	944.086
AT3G21270	TCV < Mock < NES	0	-2.14596	-1.78985	120.799	160.729	137.599	614.899	637.23	602.979	432.171	519.31	497.851
AT1G80080	TCV < Mock < NES	0	-3.87743	-1.79009	32.4096	25.8953	28.4688	578.595	347.58	349.529	78.0187	76.4581	145.692
AT1G47380	TCV < Mock = NES	0	-2.01041	-1.79113	244.545	166.98	292.28	859.95	1157.42	818.328	779.311	844.825	811.714
AT1G31850	TCV < Mock < NES	0	-2.45873	-1.79165	221.957	183.053	352.065	1393.16	1335.94	1432.9	675.87	838.012	1107.26
AT5G67200	TCV < Mock < NES	0	-2.87307	-1.79188	158.119	71.4352	225.853	1109.54	1150.32	1076.75	439.184	578.357	559.459
AT1G16515	TCV < Mock < NES	0	-3.18274	-1.79201	45.177	67.8635	38.9074	434.513	504.819	440.638	266.491	116.58	143.195
AT4G37550	TCV < Mock = NES	0	-1.87129	-1.79463	829.16	571.482	893.922	2773.85	2530.01	3091.09	3154.06	2859.99	1946.45
AT5G52960	TCV < Mock < NES	0	-2.36318	-1.79603	523.464	429.504	479.225	2346.14	3051.38	1971.28	1605.08	1726.74	1641.74
AT2G05160	TCV < Mock < NES	0	-4.89125	-1.7981	9.82109	10.7153	23.724	508.256	468.169	337.933	42.9541	55.2618	55.7793
AT4G36240	TCV < Mock < NES	0	-3.28071	-1.79855	54.9981	33.9317	157.528	694.313	751.908	949.194	277.01	307.347	273.069
AT3G10405	TCV < Mock = NES	0	-1.32343	-1.79875	543.106	476.83	504.26	1431.74	1421.98	960.79	1996.05	1857.71	1449.29
AT1G07370	TCV < Mock < NES	0	-3.30293	-1.80075	18.6601	41.9682	34.1626	277.952	354.674	303.146	87.6615	96.1404	146.525
AT5G51350	TCV < Mock < NES	0	-2.25347	-1.80119	96.2466	92.8658	91.1003	423.168	449.253	463.83	277.01	339.141	360.484
AT2G35700	TCV < Mock < NES	0	-3.4507	-1.80148	23.5706	11.6082	37.9585	240.514	277.828	281.611	87.6615	66.617	100.736
AT1G12330	TCV < Mock < NES	0	-3.1716	-1.80267	103.121	58.9341	209.72	1030.13	1269.73	1050.24	383.081	468.59	445.402
AT3G19180	TCV < Mock = NES	0	-1.97898	-1.80502	200.35	185.732	310.31	790.746	945.796	1008.83	696.909	801.675	934.928
AT5G37010	TCV < Mock < NES	0	-2.46267	-1.80563	17.678	18.7517	47.4481	148.619	179.701	134.179	73.6356	109.767	109.894
AT2G01910	TCV < Mock < NES	0	-3.09178	-1.80613	416.414	263.417	795.23	4612.87	4290.37	3672.54	1342.97	1853.16	1962.27
AT3G20790	TCV < Mock < NES	0	-2.48396	-1.80679	398.736	220.556	510.541	2187.31	2042.92	2090.55	1176.42	1259.67	1516.87
AT3G53190	TCV < Mock < NES	0	-2.50669	-1.80852	148.298	95.5446	352.065	1102.73	1235.45	1048.59	590.838	778.965	717.639
AT1G63680	TCV < Mock = NES	0	-1.66753	-1.80884	638.371	592.019	704.129	1930.92	2183.61	2030.91	2238	2444.39	2095.47
AT5G64700	TCV < Mock < NES	0	-2.89583	-1.81121	31.4275	17.8588	19.9282	130.467	184.43	200.441	75.3889	89.3273	78.2576
AT1G76160	TCV < Mock < NES	0	-3.00795	-1.81141	378.112	230.379	1231.75	4658.25	5952.61	4192.69	1739.2	2417.89	2301.94
AT3G52750	TCV < Mock < NES	0	-3.14317	-1.81255	235.706	435.755	354.912	2967.85	2892.95	3207.05	940.608	1178.67	1486.06
AT3G06980	TCV < Mock < NES	0	-2.47896	-1.81335	765.063	617.915	805.668	3698.47	4421.6	4081.7	2738.54	2760.82	2192.88
AT3G19300	TCV < Mock < NES	0	-3.13426	-1.81418	7.85687	18.7517	18.9792	116.853	106.402	177.249	48.2138	52.2338	59.942
AT2G34920	TCV < Mock < NES	0	-2.89034	-1.81578	19.6422	19.6447	46.4991	274.549	159.603	202.097	96.4276	108.253	97.4057
AT4G31040	TCV < Mock = NES	0	-1.44352	-1.81726	631.496	602.735	708.852	1792.51	2018.09	1474.32	2334.53	2620.02	1893.17
AT5G42040	TCV < Mock = NES	0	-1.84874	-1.81829	18.6601	17.8588	24.673	82.8184	78.0282	59.6353	64.8695	80.2432	70.7648
AT5G46700	TCV < Mock < NES	0	-3.50391	-1.81942	57.9444	31.2529	101.539	679.565	792.104	692.432	163.927	235.431	273.902
AT4G22290	TCV < Mock < NES	0	-3.22216	-1.81999	127.674	71.4352	176.507	1107.27	1165.69	1232.46	401.49	426.954	497.851
AT1G07320	TCV < Mock < NES	0	-2.72879	-1.82027	1990.73	1406.38	1980.48	10496.4	14760.3	10391.4	6331.79	6762.38	5896.79
AT1G41830	TCV < Mock < NES	0	-3.75896	-1.82147	366.326	312.529	1188.1	7562.57	7714.15	9998.84	1963.62	1957.63	2677.41
AT1G68238	TCV < Mock < NES	0	-4.31351	-1.82208	19.6422	4.4647	2.84688	138.409	217.533	180.562	22.792	40.1216	32.4686
AT1G48100	TCV < Mock < NES	0	-4.53321	-1.8233	69.7297	115.189	124.314	2350.68	2028.73	2781.32	318.211	280.851	495.354
AT3G13120	TCV < Mock < NES	0	-3.16129	-1.82413	1142.19	1091.17	1409.21	10628	12550.7	9409.12	4120.97	4466.37	4310.83
AT1G76870	TCV < NES < Mock	0	-1.43323	-1.82426	62.8549	76.7929	80.6617	225.765	206.893	162.34	227.92	271.767	280.562
AT3G01960	TCV < Mock = NES	0	-2.08298	-1.82577	28.4811	41.0753	61.6825	216.689	173.79	165.653	162.174	126.96	176.181
AT4G23870	TCV < Mock = NES	0	-2.04889	-1.82613	61.8728	39.2894	63.5804	159.964	276.645	245.167	166.557	211.206	206.467
AT4G13770	TCV < Mock = NES	0	-1.52068	-1.82671	1772.71	2858.3	1531.62	7080.41	3839.93	6761.98	7106.72	7103.04	7650.93
AT5G56040	TCV < Mock < NES	0	-2.64832	-1.82681	417.396	405.395	623.468	2784.06	3092.75	3190.49	1592.81	1831.21	1706.68
AT3G50240	TCV < Mock < NES	0	-4.13777	-1.82749	73.6581	46.4329	276.148	2342.74	2524.09	2108.77	493.534	513.254	399.613
AT1G11790	TCV < Mock < NES	0	-3.2385	-1.82858	195.44	141.085	234.393	1727.84	1858.49	1802.31	553.144	588.955	885.809
AT5G50280	TCV < NES < Mock	0	-1.03223	-1.82987	423.289	405.395	561.785	951.845	907.964	983.982	1719.92	1804.72	1418.63
AT3G61080	TCV < Mock < NES	0	-3.31873	-1.83007	254.366	159.836	175.558	2026.22	1893.96	1964.65	770.544	682.067	644.376
AT1G44780	TCV < Mock = NES	0	-1.83527	-1.832	72.676	56.2552	72.1211	226.9	238.814	251.793	260.355	274.038	181.491
AT4G38430	TCV < Mock < NES	0	-2.23656	-1.83244	867.202	496.475	1158.68	3755.19	4042.1	4089.98	2912.11	2843.33	3227.71
AT1G77720	TCV < Mock = NES	0	-1.67657	-1.83262	74.6402	58.0411	100.59	224.631	249.454	271.672	278.763	314.917	237.27
AT3G05140	TCV < Mock < NES	0	-4.38992	-1.83482	1.96422	1.78588	7.59169	62.3975	98.1264	77.8571	11.396	8.32712	20.8132
AT3G61750	TCV < Mock < NES	0	-2.98859	-1.83705	91.3361	75.8999	162.272	918.944	800.38	896.185	389.217	428.468	359.652
AT2G46930	TCV < Mock < NES	0	-3.19184	-1.84097	81.515	97.3305	170.813	1039.2	1071.11	1085.03	344.51	392.889	515.335
AT3G06145	TCV < Mock < NES	0	-3.66967	-1.84165	14.7316	6.25058	10.4386	139.543	151.327	109.331	25.4218	43.1496	44.124
AT3G54260	TCV < NES < Mock	0	-1.03362	-1.84255	140.442	175.016	142.344	300.642	283.739	352.842	581.196	541.263	519.497
AT5G25610	TCV < Mock < NES	0	-3.89353	-1.84492	738.546	206.269	2134.21	13766	13792.1	18202	4474.24	3249.09	3337.6
AT4G00905	TCV < Mock = NES	0	-1.47151	-1.84608	29.4633	25.8953	43.6522	98.7014	98.1264	77.7942	111.33	117.337	127.377
ATCG00670	TCV < Mock < NES	0	-2.43908	-1.84862	54.016	70.5423	37.9585	270.011	346.398	265.046	197.238	190.01	198.142
AT3G49730	TCV < Mock = NES	0	-1.82081	-1.84872	87.4077	91.9729	91.1003	321.063	345.216	289.349	337.975	360.754	275.567
AT3G16180	TCV < Mock < NES	0	-3.56994	-1.84976	20.6243	35.7176	61.6825	352.829	494.179	554.939	99.9341	149.888	175.663
AT1G77670	TCV < Mock = NES	0	-2.04499	-1.85024	211.153	271.454	214.465	872.43	1003.73	1000.55	902.913	905.386	705.151
AT1G18060	TCV < Mock < NES	0	-3.28252	-1.85239	518.553	736.676	543.755	5656.61	6178.41	5670.32	2217.84	2028.03	2250.32
AT4G17000	TCV < Mock < NES	0	-2.73392	-1.85695	19.6422	11.6082	18.9792	120.257	114.678	99.3921	52.5969	62.8319	66.6022
AT1G18650	TCV < Mock < NES	0	-3.80947	-1.85724	46.1591	45.54	94.8961	702.255	1062.84	851.459	213.894	190.01	272.237
AT5G27440	TCV < Mock = NES	0	-1.64522	-1.85725	32.4096	26.7882	34.23	79.4149	113.496	99.3921	121.849	123.393	93.3405
AT4G39040	TCV < Mock = NES	0	-1.95585	-1.85844	769.973	694.708	789.536	2836.25	3270.09	2638.86	2752.57	3002.31	2419.33
AT2G37790	TCV < Mock = NES	0	-2.14578	-1.85867	132.585	78.5787	238.189	679.565	643.141	665.927	493.534	585.927	550.301
AT1G74470	TCV < Mock < NES	0	-2.3836	-1.85945	16690.9	14818.3	15509.8	76973.5	93369	75021.1	63548.4	59327	47743
AT1G54450	TCV < Mock < NES	0	-2.46399	-1.85955	50.0875	80.3646	108.182	491.238	436.249	389.286	198.992	323.244	343.834
AT5G23120	TCV < Mock < NES	0	-2.89881	-1.86082	1578.25	1794.81	1615.13	12779	12384	12039.7	6526.4	5764.64	5826.86
AT1G78940	TCV < Mock = NES	0	-1.87254	-1.86158	25.5348	25.0023	50.2949	132.736	95.7619	140.805	108.7	127.935	129.874
AT2G02500	TCV < Mock < NES	0	-3.04686	-1.86193	175.797	187.517	190.741	1507.75	1643.32	1427.93	602.234	652.544	759.265
AT5G02190	TCV < Mock = NES	0	-2.43999	-1.86292	8.83898	1.78588	20.8771	60.1285	49.6543	61.2918	42.0775	31.7945	40.7938
AT1G01120	TCV < Mock < NES	0	-4.24623	-1.86356	403.647	108.046	1515.49	10979.7	14369	13123.1	2490.46	2790.34	2096.3
AT1G23380	TCV < Mock = NES	0	-1.7293	-1.86394	15.7137	19.6447	35.1116	94.1634	73.2992	66.2614	79.7719	88.5703	88.2479
AT1G22590	TCV < Mock < NES	0	-3.28268	-1.86396	76.6045	27.6812	87.3044	542.291	770.824	551.626	227.043	249.814	220.62
AT3G50960	TCV < Mock < NES	0	-3.22779	-1.86645	12.7674	16.9659	25.622	170.175	187.977	160.684	61.363	68.131	72.4299
AT5G13060	TCV < Mock < NES	0	-2.79794	-1.86773	11.7853	50.8976	19.9282	203.075	184.43	187.188	83.2784	106.739	111.559
AT4G36105	TCV < Mock < NES	0	-5.75332	-1.86915	1.96422	2.67882	4.74481	163.368	218.715	125.897	12.2726	12.1122	9.99033
AT1G64880	TCV < Mock = NES	0	-1.70808	-1.87193	595.158	525.049	696.538	1858.31	2157.6	1919.92	2371.24	2669.22	1609.28
AT5G16350	TCV < Mock < NES	0	-5.48549	-1.87207	4.91054	2.67882	12.3365	374.385	319.206	200.441	23.6686	22.7103	26.6409
AT1G75500	TCV < Mock = NES	0	-1.97041	-1.8722	982.109	728.639	1589.51	3886.79	4785.73	4260.61	3559.06	4135.55	4387.42
AT1G06830	TCV < Mock < NES	0	-4.46988	-1.87442	22.5885	32.1459	9.48961	537.753	475.263	410.821	49.967	67.374	118.219
AT4G00310	TCV < Mock < NES	0	-3.65607	-1.87464	20.6243	10.7153	35.1116	289.297	325.117	223.632	85.0316	94.6264	64.1046
AT3G23430	TCV < Mock = NES	0	-2.10844	-1.87674	78.5687	151.8	121.467	523.004	399.599	594.696	356.782	395.917	539.478
AT4G34220	TCV < Mock < NES	0	-2.55931	-1.88083	218.028	82.1505	300.821	1103.87	1337.12	1101.6	649.572	855.423	708.481
AT1G55360	TCV < Mock < NES	0	-2.8409	-1.88101	851.488	676.849	1081.82	5316.26	6503.53	6881.25	3066.4	3063.62	3484.13
AT2G31170	TCV < Mock < NES	0	-2.56093	-1.88222	205.261	150.907	274.25	1207.11	1283.92	1229.15	802.103	825.142	696.826
AT4G30860	TCV < Mock = NES	0	-2.19007	-1.88317	16.6958	42.8611	15.1834	104.374	107.584	129.21	86.7849	83.2712	105.731
AT4G21190	TCV < Mock = NES	0	-1.90058	-1.88432	310.346	298.242	348.269	1149.25	1272.1	1151.29	1196.58	1160.5	1175.53
AT3G24420	TCV < Mock < NES	0	-5.10037	-1.8873	109.996	123.226	123.365	3977.55	4277.36	3979	458.47	409.543	451.23
AT4G19820	TCV < Mock < NES	0	-3.57077	-1.8885	16.6958	0.89294	4.74481	93.0289	89.8506	82.8267	32.4347	29.5234	20.8132
AT3G52720	TCV < Mock < NES	0	-3.50577	-1.88942	344.72	484.867	303.668	3419.38	4798.73	4654.86	1065.09	1327.8	1805.75
AT2G20290	TCV < Mock < NES	0	-3.2848	-1.8905	77.5866	59.827	121.467	846.336	762.548	914.407	299.802	334.599	325.518
AT1G72970	TCV < Mock < NES	0	-4.63187	-1.89061	149.28	220.556	507.694	6391.77	8300.54	7065.12	917.816	1068.14	1267.94
AT2G29180	TCV < Mock = NES	0	-2.17144	-1.89191	515.607	285.741	473.532	1735.78	2373.95	1633.34	1625.24	1793.36	1312.9
AT4G26760	TCV < Mock = NES	0	-2.2703	-1.89224	139.459	93.7587	254.322	677.296	772.006	902.811	544.378	633.618	631.888
AT2G28930	TCV < Mock < NES	0	-3.03946	-1.89323	52.0518	27.6812	44.6012	341.484	387.776	293.207	159.544	165.028	137.367
AT1G75780	TCV < Mock < NES	0	-3.96575	-1.89418	7.85687	8.9294	59.7846	429.975	425.608	341.246	74.5123	71.1591	139.032
AT5G09820	TCV < Mock < NES	0	-2.52318	-1.89806	231.778	258.953	256.22	1461.23	1610.22	1222.52	850.316	1062.09	871.656
AT3G61680	TCV < Mock < NES	0	-4.90199	-1.8992	0	0.89294	4.74481	43.111	65.0235	61.2918	4.38307	7.57011	9.1578
AT2G33793	TCV < Mock < NES	0	-3.3503	-1.89956	8.83898	3.57176	2.84688	55.5905	55.5655	44.7264	12.2726	27.2524	17.4831
AT2G46940	TCV < Mock < NES	0	-2.55573	-1.90023	88.3898	164.301	114.824	855.412	556.838	748.754	533.858	378.506	459.555
AT2G24645	TCV < Mock < NES	0	-2.4259	-1.90105	52.0518	55.3623	80.6617	300.642	327.482	382.66	181.459	218.019	303.04
AT1G70200	TCV < Mock < NES	0	-2.24053	-1.90177	878.005	706.316	769.608	3674.64	4199.34	3250.12	2713.12	3083.31	2999.6
AT3G62570	TCV < Mock < NES	0	-2.51668	-1.90267	11.7853	6.25058	21.8261	66.9354	85.1217	76.2006	39.4477	60.5609	49.1191
AT5G28910	TCV < Mock < NES	0	-3.38652	-1.90295	20.6243	18.7517	17.0813	243.917	159.603	187.188	59.6098	65.86	85.7503
AT3G04810	TCV < Mock < NES	0	-3.02243	-1.90472	119.817	133.941	142.344	1152.65	1010.82	1055.21	444.444	452.693	586.099
AT5G47190	TCV < Mock < NES	0	-2.76441	-1.90579	1384.77	1151	1419.65	8411.18	10637.8	7827.13	4800.34	5115.13	4906.08
AT2G16280	TCV < Mock < NES	0	-3.00435	-1.90732	1401.47	1024.2	2411.31	10176.5	14357.2	14279.3	5237.77	6720.75	6185.68
AT4G04610	TCV < NES < Mock	0	-1.00308	-1.90928	2077.16	1401.02	1181.46	3177.73	1831.3	4330.18	5596.31	6255.18	5651.2
AT1G46264	TCV < Mock = NES	0	-2.14735	-1.91088	62.8549	76.7929	150.885	458.338	419.697	409.164	323.471	435.282	333.844
AT4G09890	TCV < Mock < NES	0	-2.42366	-1.91112	439.003	592.019	486.817	2796.54	2832.66	2514.62	1909.27	1729.77	2069.66
AT4G23800	TCV < Mock < NES	0	-3.04329	-1.91269	59.9086	87.5082	85.4065	711.331	696.343	511.869	238.439	345.197	293.05
AT5G48660	TCV < Mock = NES	0	-2.13731	-1.91545	122.764	100.902	118.62	536.618	532.01	437.325	390.094	454.964	446.235
AT4G11140	TCV < Mock < NES	0	-3.68695	-1.91618	4.91054	2.67882	8.54065	79.4149	67.388	61.2918	20.1621	24.9814	15.818
AT1G74810	TCV < Mock < NES	0	-3.78135	-1.92211	57.9444	79.4717	130.008	1504.35	1169.24	1003.86	298.049	280.094	435.412
AT2G45400	TCV < Mock < NES	0	-4.57159	-1.92725	4.91054	0.89294	73.07	519.601	702.254	654.331	104.317	115.823	79.9226
AT5G55580	TCV < Mock = NES	0	-2.11262	-1.92749	301.507	260.739	316.953	1124.29	1409.24	1268.91	1248.3	1211.22	884.977
AT2G23610	TCV < Mock < NES	0	-2.8834	-1.92754	326.06	253.595	483.021	2685.36	2706.16	2450.02	1242.16	1354.29	1446.1
AT1G50590	TCV < Mock < NES	0	-4.64173	-1.92841	14.7316	16.9659	17.0813	356.233	497.725	364.438	54.3501	68.131	63.2721
AT3G07010	TCV < Mock = NES	0	-2.04006	-1.92897	161.066	203.59	327.392	823.646	904.418	1118.16	866.972	784.264	984.048
AT2G39880	TCV < Mock < NES	0	-3.78692	-1.92924	7.85687	4.4647	8.54065	94.1634	122.954	71.231	19.2855	38.6076	21.6457
AT1G12500	TCV < Mock < NES	0	-3.61215	-1.93337	175.797	88.4011	468.787	2769.31	3735.9	2458.3	810.869	993.956	994.87
AT1G70985	TCV < Mock < NES	0	-3.76269	-1.93347	23.5706	23.2164	61.6825	408.42	530.828	533.404	134.122	119.608	160.678
AT4G23740	TCV < Mock < NES	0	-2.95749	-1.93363	318.203	254.488	340.677	2187.31	2722.71	2184.97	1078.24	1317.96	1093.11
AT3G17840	TCV < Mock < NES	0	-3.49665	-1.93387	113.925	53.5764	235.342	1270.64	1535.74	1741.02	433.924	553.375	551.966
AT3G06778	TCV < Mock < NES	0	-3.3078	-1.93708	13.7495	17.8588	24.673	215.555	179.701	162.34	63.9929	65.86	85.7503
AT2G43990	TCV < Mock = NES	0	-1.9369	-1.93716	27.499	17.8588	24.673	89.6254	87.4862	91.1094	87.6615	109.01	71.5974
AT3G56060	TCV < Mock < NES	0	-3.40824	-1.93752	136.513	99.1164	158.477	957.517	1548.74	1678.07	514.573	456.478	538.645
AT2G34620	TCV < Mock < NES	0	-4.45283	-1.93824	83.4792	192.875	174.609	3334.29	3797.37	2744.88	458.47	564.73	705.151
AT3G54910	TCV < Mock < NES	0	-2.25966	-1.93941	123.746	80.3646	126.212	508.256	532.01	541.687	368.178	470.104	428.752
AT1G02180	TCV < Mock < NES	0	-3.35596	-1.94317	24.5527	13.3941	22.7751	158.83	232.902	230.258	71.0058	72.6731	89.913
AT3G18900	TCV < Mock < NES	0	-3.72969	-1.94377	0	7.14352	17.0813	77.1459	117.042	127.553	20.1621	34.8225	38.2963
AT1G09950	TCV < Mock < NES	0	-2.7708	-1.94483	18.6601	8.03646	33.2136	154.292	128.865	125.897	78.8953	80.2432	71.5974
AT1G11820	TCV < Mock < NES	0	-3.34012	-1.94564	330.971	234.843	497.256	3327.49	3871.85	3566.52	1468.33	1433.78	1193.01
AT5G44110	TCV < Mock < NES	0	-3.70395	-1.9474	305.436	216.092	563.683	4628.76	4520.91	4992.8	1458.69	1023.48	1703.35
AT3G14450	TCV < Mock < NES	0	-2.90668	-1.95081	28.4811	27.6812	14.2344	181.52	139.505	207.067	92.9212	71.9161	107.396
AT3G20860	TCV < Mock < NES	0	-3.53924	-1.95145	22.5885	25.0023	30.3668	279.087	339.304	288.237	97.3042	96.8975	107.396
ATCG00180	TCV < Mock = NES	0	-2.00041	-1.95324	65.8013	122.333	92.0492	409.554	299.108	412.477	311.198	370.936	402.943
AT1G55490	TCV < Mock < NES	0	-3.4514	-1.95463	2007.43	1334.05	2682.71	20425.5	24723.1	20749.8	7704.57	8823.72	6822.56
AT1G12900	TCV < Mock < NES	0	-4.15779	-1.95797	4452.88	4420.05	5476.46	80770.7	92884.3	82470.6	17929.4	18357.5	19462.8
AT5G36950	TCV < Mock = NES	0	-1.5197	-1.9587	172.851	205.376	202.129	550.232	580.482	533.404	790.707	892.516	572.779
AT2G22980	TCV < Mock < NES	0	-3.24398	-1.95886	251.42	96.4376	202.129	1711.96	1931.79	1567.08	845.933	774.423	517.832
AT1G74070	TCV < Mock < NES	0	-4.76032	-1.95937	76.6045	33.9317	102.488	1727.84	2152.87	1893.42	268.244	283.879	276.399
AT5G09870	TCV < Mock < NES	0	-3.7027	-1.95992	1713.78	1538.54	2757.68	24024.2	25724.5	28504	6829.71	7683.66	8868.08
AT5G61270	TCV < Mock < NES	0	-3.57533	-1.96117	159.102	49.1117	253.373	1616.66	2164.69	1721.14	651.325	620.749	525.325
AT5G49800	TCV < Mock = NES	0	-2.27108	-1.96383	16.6958	16.0729	40.8053	106.643	135.958	112.644	79.7719	116.58	90.7455
AT5G22020	TCV < NES < Mock	0	-1.55713	-1.96847	763.098	848.293	816.107	2338.2	2449.61	2355.59	2993.64	2950.83	3555.73
AT5G65700	TCV < Mock < NES	0	-3.51986	-1.96929	603.997	316.994	739.241	6078.65	5484.44	7480.91	2110.89	2216.53	2173.73
AT3G19570	TCV < Mock < NES	0	-3.1937	-1.97227	87.4077	38.3964	110.08	701.12	756.637	700.714	298.926	310.375	316.36
AT1G62290	TCV < Mock < NES	0	-3.54841	-1.97245	3.92843	28.5741	12.3365	155.426	169.061	200.441	63.1163	61.3179	51.6167
AT3G23805	TCV < Mock < NES	0	-3.81595	-1.97302	41.2486	37.5035	124.314	856.547	1046.29	957.477	264.738	219.533	313.03
AT3G07210	TCV < Mock < NES	0	-3.00489	-1.97369	72.676	42.8611	89.2024	536.618	527.281	579.787	238.439	295.234	270.571
AT2G21140	TCV < Mock < NES	0	-4.57236	-1.97382	56.9623	25.0023	137.599	2352.95	1476.62	1394.8	255.972	211.963	394.618
AT5G61000	TCV < Mock < NES	0	-3.25506	-1.97607	32.4096	117.868	53.1418	633.051	688.067	621.201	223.537	251.328	325.518
AT3G53380	TCV < Mock < NES	0	-3.68622	-1.97655	29.4633	18.7517	47.4481	476.49	392.505	362.781	113.083	137.776	125.712
AT3G49810	TCV < Mock < NES	0	-2.98067	-1.97711	136.513	149.121	154.681	1238.87	1199.98	1036.99	543.501	596.525	593.592
AT2G28740	TCV < Mock < NES	0	-2.60813	-1.97717	191.511	265.203	177.456	1202.57	1382.04	1282.16	873.108	838.769	785.073
AT3G54720	TCV < Mock < NES	0	-3.31138	-1.98107	81.515	75.8999	66.4273	729.483	701.072	791.824	345.386	261.169	277.232
AT5G66920	TCV < Mock < NES	0	-3.10485	-1.98316	114.907	129.476	292.28	1338.71	1754.45	1524.01	591.715	735.058	795.064
AT1G50790	TCV < NES < Mock	0	-1.42908	-1.9834	45.177	48.2188	51.2439	140.678	122.954	125.897	206.881	203.636	161.51
AT2G32180	TCV < Mock < NES	0	-2.95243	-1.98406	81.9373	40.1395	88.2392	523.528	628.112	476.519	271.586	319.905	240.619
AT1G70430	TCV < Mock < NES	0	-3.77107	-1.98509	26.5169	12.5012	16.1323	264.338	213.986	274.985	71.8824	66.617	79.9226
AT5G05940	TCV < Mock < NES	0	-2.70903	-1.98608	27.499	20.5376	26.5709	199.672	160.785	127.553	79.7719	130.963	84.9178
AT5G56530	TCV < Mock < NES	0	-2.72149	-1.98803	62.8549	58.0411	124.314	507.121	585.211	525.122	273.504	342.169	357.154
AT3G03770	TCV < Mock < NES	0	-3.19471	-1.98813	505.786	669.705	430.828	5016.76	4368.4	5322.45	1747.09	2068.91	2556.69
AT3G59010	TCV < Mock < NES	0	-3.99867	-1.9885	78.5687	115.189	284.688	3375.13	1945.98	2327.43	534.735	481.459	882.479
AT5G46580	TCV < Mock = NES	0	-2.17829	-1.99437	824.971	778.644	955.604	3960.54	3832.84	3790.15	3701.94	3607.92	2887.21
AT1G62950	TCV < Mock < NES	0	-3.04582	-1.99659	79.5508	73.2211	107.233	668.22	718.805	760.349	310.322	361.851	365.48
ATCG01300	TCV < Mock < NES	0	-4.01577	-1.99801	8.83898	5.35764	5.69377	111.181	85.1217	125.897	25.4218	24.9814	29.1385
AT1G30530	TCV < Mock < NES	0	-3.57208	-1.9986	1135.32	894.726	1243.14	14543.1	12419.5	11966.8	3849.22	4283.17	4947.71
AT4G17560	TCV < Mock < NES	0	-3.35454	-1.99881	819.079	696.493	919.543	8025.45	9560.82	7321.88	3094.45	3326.31	3311.79
AT2G46630	TCV < Mock < NES	0	-3.83669	-1.99929	92.3182	83.0435	116.722	1255.89	1332.39	1585.3	357.659	307.347	502.847
AT2G27060	TCV < Mock < NES	0	-2.38812	-2.00006	132.585	189.303	267.607	924.617	1041.56	1119.82	731.973	865.264	760.93
AT3G11120	TCV < Mock < NES	0	-2.68569	-2.00059	441.949	314.315	511.49	2333.66	3542.01	2281.05	1742.71	1965.96	1364.51
AT2G18990	TCV < Mock < NES	0	-2.97369	-2.00211	61.8728	48.2188	130.008	570.653	709.347	606.292	310.322	361.851	289.72
AT1G72250	TCV < Mock < NES	0	-2.9115	-2.00352	36.338	31.2529	55.9887	314.256	286.103	329.65	142.888	177.898	174.831
AT1G23935	TCV < Mock < NES	0	-3.08699	-2.0057	24.5527	35.6819	38.9074	293.835	242.36	306.459	100.873	182.44	114.915
AT1G06550	TCV < Mock = NES	0	-2.0791	-2.01623	745.42	498.261	819.903	2871.42	3136.5	2711.75	2757.83	2875.13	2714.87
AT5G06390	TCV < Mock < NES	0	-3.48348	-2.01697	128.656	108.939	386.227	2213.41	2440.15	2324.12	672.364	782.75	1069.8
AT3G63200	TCV < Mock < NES	0	-4.77899	-2.01749	2.94633	0.89294	92.9982	797.553	896.142	965.76	108.7	129.449	154.018
AT4G13500	TCV < Mock < NES	0	-4.39298	-2.01772	284.811	264.31	260.016	5388.32	6294.51	5317.48	1030.02	1065.43	1181.19
AT3G45850	TCV < Mock < NES	0	-3.24676	-2.01825	305.436	327.709	492.511	3296.85	3223.98	4164.53	1372.78	1548.85	1638.41
AT3G23530	TCV < Mock < NES	0	-3.77798	-2.02071	591.605	732.423	675.372	8497.42	8627.86	10302.6	2325.93	2809.74	2977.68
AT3G50620	TCV < Mock < NES	0	-2.94572	-2.0216	75.6224	60.7199	64.5294	630.782	509.548	407.508	248.082	277.066	290.552
AT5G19220	TCV < Mock < NES	0	-3.91965	-2.02246	1084.25	1059.03	999.256	15708.3	17019.6	14829.3	4010.51	4293.77	4463.18
AT1G16640	TCV < Mock < NES	0	-3.54927	-2.02565	16.6958	4.4647	11.3875	115.719	143.052	122.584	43.8307	52.9908	35.7987
AT3G49680	TCV < Mock < NES	0	-2.38761	-2.028	791.579	687.564	799.974	4003.65	3816.29	4106.55	2902.47	3131.76	3261.01
AT3G21510	TCV < Mock < NES	0	-2.92446	-2.02842	10.8032	17.8588	22.7751	135.005	143.052	112.644	76.2655	45.4207	88.2479
AT4G17180	TCV < NES < Mock	0	-1.23908	-2.02952	75.6224	70.5423	85.4065	166.771	200.982	178.906	260.355	358.823	326.351
AT1G08560	TCV < Mock < NES	0	-2.76128	-2.02964	54.016	76.7929	71.1721	488.969	492.996	387.629	241.946	324.758	258.084
AT1G72645	TCV < Mock < NES	0	-4.07231	-2.03057	124.728	138.406	104.386	1972.89	2628.13	1581.99	351.523	479.945	670.185
AT5G66740	TCV < Mock < NES	0	-5.09351	-2.03066	11.7853	35.7176	26.5709	829.319	872.497	828.267	94.6744	92.3554	115.721
AT4G17540	TCV < Mock < NES	0	-2.44348	-2.03076	105.086	81.2576	108.182	499.18	633.684	469.349	444.444	435.282	323.853
AT3G44730	TCV < Mock < NES	0	-2.70205	-2.03264	59.9086	60.7199	72.1211	378.923	381.865	493.647	255.095	283.879	249.758
AT5G20270	TCV < Mock < NES	0	-4.07358	-2.03282	165.976	108.939	437.471	3261.69	4116.58	4616.76	971.289	884.946	1058.98
AT5G23280	TCV < NES < Mock	0	-1.67692	-2.03399	836.756	786.68	1249.78	2660.4	3266.54	3260.06	3663.37	4325.56	3778.01
AT4G17240	TCV < Mock < NES	0	-3.70796	-2.03403	19.6422	6.25058	49.346	326.736	390.141	266.702	77.1421	112.038	119.051
AT2G45350	TCV < Mock = NES	0	-1.63555	-2.0379	48.1233	33.9317	37.9585	130.467	93.3974	149.088	163.05	190.01	139.865
AT4G31850	TCV < Mock < NES	0	-3.05284	-2.03939	359.452	281.276	390.972	2752.29	2564.29	3245.15	1465.7	1412.58	1362.85
AT2G04280	TCV < NES < Mock	0	-1.76856	-2.04001	871.13	777.751	1171.02	3055.21	3259.45	3293.19	3508.21	4182.49	3906.22
AT1G21060	TCV < Mock < NES	0	-3.07357	-2.04259	157.137	118.761	199.282	1276.31	1480.17	1244.06	614.507	755.497	587.764
AT3G21700	TCV < NES < Mock	0	-1.29321	-2.04294	476.323	485.76	534.265	1516.83	1184.61	965.76	2092.48	2275.58	1798.26
AT5G57830	TCV < NES < Mock	0	-1.44946	-2.04353	48.1233	47.3258	80.6617	136.14	180.884	163.997	220.03	276.309	229.778
AT4G17760	TCV < Mock < NES	0	-2.85248	-2.04499	2.94633	10.7153	9.48961	52.187	47.2898	67.9179	26.2984	31.0375	38.2963
AT2G03350	TCV < Mock < NES	0	-3.1806	-2.04566	230.796	205.376	313.157	2030.75	2772.37	1991.15	874.862	1115.83	1103.1
AT4G10600	TCV < Mock < NES	0	-2.6781	-2.04675	29.4633	49.1117	40.8053	307.449	244.725	212.036	147.271	186.225	159.845
AT3G14870	TCV < Mock < NES	0	-3.93169	-2.04752	44.1949	32.1459	99.6409	1055.08	1001.36	629.483	208.634	297.505	221.452
AT1G17650	TCV < Mock < NES	0	-3.523	-2.0488	144.37	149.121	198.333	1911.63	2109.13	1633.34	680.253	689.637	665.19
AT1G26330	TCV < Mock < NES	0	-3.06943	-2.04943	5.89265	16.9659	11.3875	98.7014	102.855	86.1398	43.8307	52.2338	45.789
AT5G16250	TCV < Mock < NES	0	-3.48966	-2.05084	45.177	39.2894	49.346	558.174	484.721	460.517	142.012	221.047	191.481
AT5G44370	TCV < Mock < NES	0	-2.53129	-2.05175	105.086	73.2211	119.569	538.887	560.384	622.857	390.97	484.487	359.652
AT1G29380	TCV < Mock = NES	0	-2.33387	-2.0545	21.6064	26.7882	26.5709	104.374	131.229	142.462	78.8953	130.206	102.401
AT4G30020	TCV < Mock < NES	0	-3.1556	-2.0548	238.652	131.262	499.154	2301.9	2260.45	3182.2	1018.63	1286.92	1305.4
AT4G18370	TCV < Mock < NES	0	-2.34513	-2.05557	613.818	484.867	512.439	2650.19	2807.83	2728.31	2232.74	2160.51	2304.44
AT2G15050	TCV < Mock < NES	0	-3.77855	-2.05619	245.527	83.9364	450.757	3538.5	3337.48	3831.57	921.322	1059.82	1263.78
AT1G59840	TCV < Mock < NES	0	-2.55384	-2.05643	197.404	137.513	187.894	975.669	1047.47	1046.93	656.584	746.413	771.753
AT1G51110	TCV < Mock < NES	0	-3.71766	-2.05782	418.378	497.368	485.868	6682.2	6115.76	5642.16	1753.23	1837.27	2245.33
AT2G30150	TCV < Mock < NES	0	-3.97489	-2.05836	125.71	156.265	166.068	2246.31	2625.77	2173.37	590.838	601.067	674.347
AT3G10870	TCV < Mock < NES	0	-3.08029	-2.05868	36.338	20.5376	104.386	511.659	459.893	392.599	194.608	197.58	279.729
AT1G56670	TCV < Mock < NES	0	-3.76963	-2.0592	29.4633	79.4717	84.4576	874.699	815.749	947.538	240.192	269.496	296.38
AT5G55820	TCV < Mock < NES	0	-2.74066	-2.05925	30.4454	27.6812	36.0605	233.707	193.888	202.097	120.973	147.617	124.047
AT5G04890	TCV < Mock < NES	0	-2.80088	-2.0597	40.2664	23.2164	42.7033	239.379	250.636	250.137	142.888	156.701	143.195
AT3G14330	TCV < Mock = NES	0	-1.92631	-2.06057	160.084	242.88	232.496	874.699	763.731	776.915	951.127	1003.8	695.993
AT3G20350	TCV < Mock < NES	0	-2.89888	-2.06672	74.6402	44.647	99.6409	496.911	558.02	578.131	288.406	305.833	323.021
AT5G54200	TCV < Mock < NES	0	-2.64572	-2.06831	97.2287	108.939	147.089	687.506	777.917	745.441	447.074	503.413	531.153
AT2G24350	TCV < Mock < NES	0	-3.31162	-2.06856	13.7495	19.6447	10.4386	155.426	169.061	110.988	57.8566	62.8319	63.2721
AT1G13250	TCV < Mock < NES	0	-3.93844	-2.07008	26.5169	4.4647	82.5596	523.004	638.413	579.787	125.356	148.374	203.137
AT3G28760	TCV < Mock < NES	0	-3.62207	-2.07018	49.1054	34.8247	73.07	670.489	621.861	641.079	195.485	214.991	248.926
AT3G02110	TCV < Mock < NES	0	-3.42846	-2.07231	60.8907	24.1094	326.443	1378.42	1638.59	1413.02	561.91	595.768	572.779
AT2G39470	TCV < Mock < NES	0	-3.5037	-2.0724	688.458	901.87	799.974	8868.38	9721.6	8522.87	3286.43	3336.91	3430.01
AT1G51630	TCV < Mock = NES	0	-1.95416	-2.07269	584.355	467.901	745.884	2198.66	2386.95	2382.1	2285.33	2512.52	2766.49
AT5G18500	TCV < Mock < NES	0	-3.21642	-2.07274	433.11	384.857	702.231	4334.92	4896.86	4898.37	1929.43	2142.34	2323.58
AT1G07180	TCV < Mock < NES	0	-3.29122	-2.07372	964.431	1135.82	951.808	9373.23	10103.5	10401.4	5119.43	3991.72	3737.22
AT3G23930	TCV < Mock = NES	0	-2.44741	-2.07658	40.2664	20.5376	52.1929	189.461	178.519	248.48	120.973	164.271	191.481
AT4G23790	TCV < Mock < NES	0	-3.07029	-2.07714	104.104	82.1505	187.894	1166.27	994.268	982.325	409.379	486.001	683.505
AT5G12900	TCV < Mock < NES	0	-3.493	-2.07802	176.78	69.6493	199.282	1539.52	1873.86	1605.18	521.586	675.254	685.17
AT4G39970	TCV < Mock < NES	0	-2.93982	-2.07813	659.977	471.472	527.622	4482.41	4479.53	3768.62	2376.5	2166.57	2462.62
AT2G14660	TCV < Mock < NES	0	-3.36495	-2.07816	54.9981	59.827	70.2231	578.595	715.258	612.918	243.699	267.225	270.571
AT3G13674	TCV < Mock = NES	0	-2.19967	-2.07953	13.7495	23.2164	22.7751	85.0874	118.225	71.231	83.2784	88.5703	80.7552
AT4G38840	TCV < NES < Mock	0	-1.4149	-2.08141	307.4	290.206	211.618	578.595	803.927	775.258	1176.42	1253.61	994.87
AT1G48600	TCV < Mock < NES	0	-2.64643	-2.08166	1832.61	2025.19	1431.98	11376.8	9150.58	12593	7490.67	7801	7099.79
AT2G42960	TCV < Mock < NES	0	-3.396	-2.08319	12.7674	16.0729	39.8564	242.783	247.089	233.571	92.0446	115.066	84.0853
AT2G13610	TCV < Mock < NES	0	-4.0494	-2.08432	52.0518	45.54	135.701	1220.72	1328.84	1313.63	283.147	355.795	350.494
AT4G11100	TCV < Mock < NES	0	-2.98579	-2.09005	283.829	266.096	278.995	2061.38	2396.41	2108.77	1101.03	1211.98	1216.32
AT4G35970	TCV < Mock = NES	0	-2.47481	-2.09029	20.6243	8.03646	27.5199	117.988	85.1217	109.331	69.2526	81.0002	89.0804
AT1G21440	TCV < NES < Mock	0	-1.18381	-2.09035	311.328	524.156	302.719	1041.47	651.417	892.872	1427.13	1727.5	1692.53
AT2G23690	TCV < Mock < NES	0	-4.33118	-2.0923	11.7853	0	31.3157	199.672	357.038	311.429	42.9541	64.346	76.5925
AT1G52827	TCV < Mock < NES	0	-4.47106	-2.09272	18.6601	7.14352	83.5086	611.495	1074.66	738.815	177.076	129.449	159.845
AT1G72410	TCV < NES < Mock	0	-1.6772	-2.09349	548.999	440.22	704.129	1665.44	1821.84	1928.21	2261.67	2569.3	2396.01
AT1G68400	TCV < Mock < NES	0	-4.2099	-2.09426	29.4633	25.0023	70.2231	721.541	905.6	680.836	143.765	217.262	171.501
AT5G23800	TCV < Mock < NES	0	-3.54975	-2.09517	14.7316	13.3941	17.0813	203.075	189.159	137.492	66.6227	65.86	60.7745
AT1G14630	TCV < Mock < NES	0	-3.26219	-2.09584	5.89265	16.0729	12.3365	120.257	106.402	102.705	42.9541	61.3179	42.4589
AT1G79560	TCV < Mock < NES	0	-2.45422	-2.09638	458.645	357.176	562.734	2622.96	2336.12	2595.79	2039.01	2069.67	1786.6
AT3G52940	TCV < Mock < NES	0	-3.34289	-2.09642	97.2287	64.2917	137.599	881.506	1101.85	1051.9	366.425	446.637	466.215
AT1G70550	TCV < Mock < NES	0	-3.22929	-2.09646	130.62	136.62	247.679	1806.12	1523.91	1499.16	705.675	779.722	716.806
AT3G62030	TCV < Mock < NES	0	-4.31598	-2.09748	1376.92	1460.85	1637.91	29955.3	33361.8	25828.7	5131.7	5931.18	8091.34
AT1G78820	TCV < Mock < NES	0	-2.79663	-2.09765	125.71	26.7998	455.501	1166.27	1658.69	1399.77	933.866	934.447	734.134
AT5G22800	TCV < Mock = NES	0	-1.83251	-2.1053	1565.48	1774.27	1465.2	6072.97	4902.77	6137.46	8319.07	6979.64	5376.46
AT5G07030	TCV < Mock < NES	0	-3.76172	-2.10699	5.89265	27.6812	83.5086	500.314	483.538	604.635	117.466	176.384	210.629
AT2G43445	TCV < Mock < NES	0	-3.09352	-2.1078	11.7853	7.14352	32.2647	159.964	134.776	142.462	59.6098	87.0563	74.095
AT3G23740	TCV < Mock < NES	0	-4.09835	-2.10993	4.91054	33.0388	10.4386	289.297	301.473	238.541	52.5969	68.131	88.2479
AT5G22740	TCV < Mock = NES	0	-2.76517	-2.11083	179.726	145.549	509.592	2196.39	1402.14	2077.29	876.615	1312.66	1416.96
AT2G22610	TCV < Mock < NES	0	-2.8308	-2.11117	18.6601	43.7541	43.6522	277.952	264.823	212.036	160.421	159.729	138.2
AT5G38300	TCV < Mock < NES	0	-3.02087	-2.11399	6.87476	14.287	8.54065	82.8184	92.2151	66.2614	37.6944	47.6917	43.2914
AT4G30620	TCV < Mock = NES	0	-2.60572	-2.11777	256.33	218.77	258.117	1404.51	1947.16	1111.53	1044.92	1130.97	1006.53
AT2G25840	TCV < Mock < NES	0	-2.77987	-2.11949	295.615	274.133	415.645	1986.51	2814.93	1966.31	1419.24	1538.25	1324.55
AT5G47110	TCV < Mock = NES	0	-2.08328	-2.12173	4011.91	3413.71	3569.99	14990.1	17315.2	14290.9	16214.7	16441.5	15198.6
AT4G09010	TCV < Mock < NES	0	-4.04783	-2.12436	846.578	517.012	997.358	11924.7	14769.8	12354.4	3219.81	3385.35	3688.93
AT3G15680	TCV < Mock < NES	0	-3.06061	-2.12521	51.0696	41.0753	89.2024	470.817	568.66	473.769	184.966	281.608	324.686
AT3G49650	TCV < Mock < NES	0	-4.03414	-2.12642	34.4101	25.0023	45.5501	568.384	604.127	547.568	135.875	155.187	167.338
AT2G38750	TCV < Mock < NES	0	-4.37191	-2.12674	74.6402	91.9729	126.212	2812.42	1607.85	1643.28	408.502	387.59	482.866
AT5G49390	TCV < Mock < NES	0	-3.80992	-2.13057	14.7316	6.25058	24.673	186.058	229.356	225.289	38.5711	67.374	94.0756
AT3G19790	TCV < Mock = NES	0	-2.10695	-2.13257	120.799	141.978	163.221	570.653	671.515	593.039	624.15	682.824	561.124
AT1G11990	TCV < Mock = NES	0	-2.63099	-2.13433	19.6422	12.5012	96.794	315.391	281.374	202.097	171.816	219.533	174.831
AT1G50280	TCV < Mock = NES	0	-2.33142	-2.13464	76.6045	75.8999	84.4576	349.426	387.776	455.547	382.204	367.908	290.552
AT4G21960	TCV < NES < Mock	0	-1.39684	-2.135	14937.9	11894.9	23973.6	45294.9	32978.7	55512.1	78901.5	77165.2	67094.2
AT2G26250	TCV < Mock < NES	0	-3.4835	-2.13625	1668.6	1079.56	2458.76	17022	20922.2	20295.9	8410.24	8333.94	6146.55
AT5G43745	TCV < Mock < NES	0	-3.6159	-2.13629	219.01	316.101	251.475	3435.64	2986.35	3221.96	974.796	1077.23	1406.14
AT5G54530	TCV < Mock < NES	0	-3.66234	-2.13696	21.6064	12.5012	25.622	341.484	241.178	173.936	98.1809	85.5423	79.0901
AT3G26690	TCV < Mock < NES	0	-3.42381	-2.1384	25.5348	26.7882	38.9074	299.508	336.94	342.903	123.603	107.496	170.668
AT3G44940	TCV < Mock < NES	0	-3.67106	-2.13898	42.2307	10.7153	40.8053	389.133	440.978	364.438	99.0575	149.131	164.84
AT3G25400	TCV < Mock < NES	0	-2.79299	-2.1393	39.2843	51.7905	54.0908	363.04	258.912	384.316	202.498	224.832	212.295
AT5G35480	TCV < NES < Mock	0	-1.51565	-2.1411	2273.58	2342.18	1359.86	6117.22	6893.67	4075.08	9271.08	9449.77	7637.61
AT2G01760	TCV < Mock < NES	0	-3.09661	-2.14381	78.5687	118.761	116.722	829.319	977.717	879.62	460.223	464.048	463.718
AT5G65010	TCV < Mock < NES	0	-3.63776	-2.14455	384.004	308.957	296.076	3367.19	4875.58	4068.45	1321.94	1794.12	1257.12
AT2G32690	TCV < Mock < NES	0	-5.04769	-2.14643	1413.25	363.427	1395.92	28549.7	40143.1	36243.3	4556.64	4268.79	5220.78
AT4G16155	TCV < Mock < NES	0	-3.92398	-2.14863	226.867	136.62	240.087	2816.96	3409.6	2935.38	902.913	891.002	882.479
AT1G05470	TCV < Mock < NES	0	-3.61621	-2.14877	54.016	50.0047	70.2231	693.179	753.09	690.775	231.426	289.935	251.423
AT1G16340	TCV < NES < Mock	0	-1.08342	-2.15018	282.847	206.269	310.31	574.057	623.043	496.96	1143.11	1273.29	1132.24
AT3G54250	TCV < Mock = NES	0	-2.3362	-2.15044	45.177	50.8976	86.3555	306.315	308.566	306.459	233.18	259.655	317.193
AT4G02790	TCV < Mock < NES	0	-2.75961	-2.15088	299.543	263.417	397.615	2256.52	2234.44	2014.35	1435.02	1456.49	1374.5
AT3G14240	TCV < Mock = NES	0	-2.46618	-2.15158	218.028	121.44	540.908	1432.87	1772.19	1659.85	1250.05	1459.52	1202.17
AT1G14290	TCV < Mock < NES	0	-2.67858	-2.15185	255.348	239.308	289.433	1563.34	1904.6	1552.17	1105.41	1178.67	1200.5
AT1G64670	TCV < Mock < NES	0	-4.04503	-2.15197	45.177	17.8588	240.087	1224.12	1573.57	2206.5	434.801	508.712	403.776
AT4G39840	TCV < Mock < NES	0	-3.59159	-2.15504	460.609	148.228	1110.28	6740.06	6985.89	6998.86	2453.64	2638.94	2564.18
AT5G40830	TCV < Mock = NES	0	-2.22265	-2.15708	228.831	206.273	365.366	1135.61	1333.49	1267.21	998.377	1299.03	1272.88
AT3G06130	TCV < Mock < NES	0	-2.89673	-2.15818	141.424	58.9341	442.216	1447.62	1527.46	1810.59	813.499	975.788	1078.96
AT2G34190	TCV < Mock = NES	0	-2.18909	-2.1604	34.3738	14.287	22.7751	107.777	117.042	101.049	78.8953	133.991	106.564
AT3G11630	TCV < Mock < NES	0	-4.18434	-2.16089	1437.81	1556.39	1810.62	29527.6	32034.1	25793.9	6407.18	7151.49	7928.16
AT5G04050	TCV < Mock = NES	0	-1.97166	-2.16146	61.8728	38.3964	47.4481	180.385	173.79	225.289	251.588	236.188	173.166
AT3G17680	TCV < Mock = NES	0	-2.55728	-2.16272	9.82109	8.03646	12.3365	66.9354	66.2057	44.7264	42.9541	50.7198	41.6264
AT2G46380	TCV < Mock < NES	0	-2.62515	-2.16537	96.2466	72.3282	149.936	620.571	562.749	781.884	478.632	522.338	427.919
AT3G02120	TCV < Mock < NES	0	-3.30173	-2.16579	6.87476	9.82234	9.48961	79.4149	78.0282	101.049	40.3243	43.1496	34.1336
AT5G12940	TCV < Mock < NES	0	-4.34818	-2.16596	32.4096	14.287	160.374	1245.68	1030.92	1941.46	369.931	225.589	333.844
AT5G12050	TCV < Mock = NES	0	-2.23124	-2.16957	44.1949	38.3964	55.9887	215.555	228.173	207.067	248.959	192.281	182.324
AT2G40130	TCV < Mock < NES	0	-4.51203	-2.17646	61.8728	95.5446	71.1721	2067.06	1143.23	2006.06	231.426	239.216	562.789
AT2G36590	TCV < Mock < NES	0	-4.75918	-2.17852	106.068	81.2576	65.4783	2661.53	2025.19	2160.12	421.652	373.207	349.662
AT2G18328	TCV < Mock < NES	0	-3.41113	-2.17983	113.925	275.919	196.435	2521.99	1533.37	2181.66	872.232	540.506	1243.8
AT3G48420	TCV < Mock < NES	0	-4.46023	-2.18135	256.33	240.201	301.77	6348.66	5484.44	5739.89	1122.07	1062.84	1436.11
AT3G47860	TCV < Mock < NES	0	-3.36889	-2.18151	111.96	69.6493	99.6409	817.974	1216.53	871.337	387.464	407.272	481.201
AT3G49900	TCV < Mock < NES	0	-4.19719	-2.1828	12.7674	10.7153	28.4688	329.005	318.024	306.459	71.8824	82.5142	81.5877
AT4G13260	TCV < Mock < NES	0	-3.87553	-2.18473	20.6243	6.25058	9.48961	211.017	152.51	170.623	49.0904	77.2152	39.1288
AT3G10520	TCV < Mock < NES	0	-3.36056	-2.18485	362.398	94.6517	185.996	2106.76	2487.44	2011.03	1024.76	975.031	924.106
AT2G41330	TCV < Mock < NES	0	-3.76818	-2.18583	29.4633	55.3623	89.2024	731.752	826.39	813.359	240.192	261.169	290.552
AT5G27390	TCV < Mock < NES	0	-2.77926	-2.18783	181.69	209.841	261.913	1404.51	1782.83	1298.72	913.433	992.442	1071.46
AT4G14750	TCV < Mock < NES	0	-3.16954	-2.18813	21.6064	1.78588	148.038	484.431	591.123	467.143	195.485	261.169	324.686
AT4G17360	TCV < Mock < NES	0	-3.57124	-2.18838	54.016	56.2552	45.5501	599.016	637.23	616.231	231.426	231.645	247.261
AT1G12380	TCV < Mock < NES	0	-3.639	-2.19215	28.4811	50.8976	193.588	1179.88	942.25	1278.84	314.705	413.328	519.497
AT1G32080	TCV < Mock < NES	0	-3.84755	-2.19266	1241.39	1047.42	1242.19	18754.4	14853.7	17223	4838.04	5167.36	6136.56
AT1G22330	TCV < Mock < NES	0	-3.97562	-2.19769	7.85687	0.89294	55.9887	264.338	406.692	347.872	85.9082	111.281	99.9033
AT5G11450	TCV < NES < Mock	0	-1.77049	-2.19823	1246.3	953.66	1218.47	3739.31	4293.92	3629.47	5021.25	5832.02	4834.49
AT3G15520	TCV < Mock < NES	0	-4.54299	-2.19838	164.994	205.376	224.904	4492.62	5039.91	4345.09	816.128	897.058	1019.01
AT4G12700	TCV < NES < Mock	0	-1.76591	-2.20038	229.813	350.033	356.809	1019.91	1064.02	1101.6	1385.93	1583.67	1335.37
AT4G15920	TCV < Mock < NES	0	-4.38207	-2.20201	34.3738	52.6835	110.08	1693.81	1121.95	1295.41	232.303	311.889	362.982
AT2G02020	TCV < Mock < NES	0	-3.32974	-2.20202	47.1412	57.1482	71.1721	579.729	540.286	644.392	254.218	237.702	315.528
AT2G26640	TCV < Mock = NES	0	-2.6074	-2.20438	143.388	120.547	226.802	859.95	1121.95	1008.83	766.161	863.75	631.888
AT3G09800	TCV < Mock < NES	0	-3.54166	-2.20639	20.6243	26.7882	67.3762	437.918	430.337	468.799	156.037	166.542	207.299
AT1G21810	TCV < Mock < NES	0	-3.26475	-2.20695	13.7495	17.8588	28.4688	188.327	193.888	195.471	69.2526	107.496	100.736
AT2G46250	TCV < Mock = NES	0	-2.44215	-2.20772	185.619	155.372	228.7	934.827	1140.87	1020.43	1011.61	925.825	694.328
AT1G30600	TCV < Mock < NES	0	-3.17474	-2.20824	27.499	33.0388	49.346	318.794	319.206	354.498	155.161	194.552	158.18
AT2G32860	TCV < Mock < NES	0	-3.63275	-2.21046	400.7	102.688	359.656	3649.68	3239.35	3816.66	1238.66	1325.53	1430.28
AT4G23490	TCV < Mock < NES	0	-3.39525	-2.21063	71.6939	66.0776	132.855	900.792	903.235	1043.62	397.983	419.384	435.412
AT2G37640	TCV < Mock < NES	0	-3.05986	-2.21073	50.0875	0.89294	148.038	517.332	620.679	521.808	260.355	358.823	302.207
AT2G20980	TCV < Mock = NES	0	-2.34827	-2.21284	10.8032	26.7882	11.3875	83.9529	91.0329	74.5441	83.2784	68.131	75.76
AT5G10080	TCV < Mock < NES	0	-3.33863	-2.21462	12.7674	11.6082	18.9792	127.064	114.678	197.128	54.3501	70.4021	76.5925
AT5G17160	TCV < Mock < NES	0	-3.1098	-2.21495	22.5885	21.4306	37.0095	272.28	218.715	208.723	106.07	145.346	124.879
AT1G77940	TCV < Mock = NES	0	-1.81591	-2.21601	1519.32	1432.28	1831.5	4867	6998.89	4974.57	7388.99	8932.73	5900.96
AT2G27130	TCV < Mock < NES	0	-3.50619	-2.21731	28.4811	13.3941	45.5501	311.987	398.417	283.267	107.824	150.645	148.19
AT4G16141	TCV < Mock < NES	0	-3.27475	-2.21843	129.638	116.082	190.741	1274.04	1837.21	1113.19	761.778	843.311	426.254
AT5G28290	TCV < Mock < NES	0	-2.78607	-2.21899	48.1233	25.0023	93.9472	381.192	410.239	361.125	212.141	303.562	262.246
AT5G52340	TCV < Mock < NES	0	-4.72137	-2.21904	0	3.57176	1.89792	60.1285	40.1963	44.7264	4.38307	4.54207	16.6506
AT2G43800	TCV < Mock < NES	0	-3.18869	-2.22069	39.2843	26.7882	131.906	735.155	453.982	616.231	221.784	307.347	393.786
AT5G42860	TCV < Mock < NES	0	-3.26562	-2.22656	34.3738	46.4329	48.397	494.642	377.136	371.064	128.862	186.225	289.72
AT4G22730	TCV < Mock < NES	0	-3.51137	-2.2291	69.7297	33.9317	159.425	847.471	1013.18	1139.7	416.392	420.898	396.283
AT4G33130	TCV < Mock < NES	0	-2.89532	-2.23075	10.8032	9.82234	36.0605	140.678	128.865	152.401	71.8824	80.2432	114.056
AT1G17140	TCV < Mock < NES	0	-3.69231	-2.23185	145.352	83.9364	277.097	2006.93	2154.05	2385.41	833.661	801.675	743.447
AT5G58260	TCV < Mock < NES	0	-4.30335	-2.23288	197.404	137.513	167.966	3367.19	3255.9	3306.44	746.876	672.226	944.919
AT2G17780	TCV < Mock < NES	0	-3.34228	-2.23389	107.05	73.2211	146.14	1127.69	1144.41	1038.65	400.613	557.16	577.774
AT1G77870	TCV < Mock < NES	0	-3.30462	-2.23419	8.83898	2.67882	25.622	91.8944	139.505	135.836	43.8307	55.2618	75.76
AT1G08280	TCV < Mock < NES	0	-2.56624	-2.23512	88.3898	86.6152	140.446	562.712	667.969	637.766	491.781	556.403	437.077
AT4G29920	TCV < Mock = NES	0	-2.64882	-2.23778	54.9981	37.5035	67.3762	309.718	303.837	389.286	236.686	303.562	213.96
ATCG01130	TCV < Mock = NES	0	-2.68427	-2.2402	8.83898	10.7153	21.8261	88.4909	89.8506	87.7963	46.4606	73.3975	75.76
AT5G47250	TCV < Mock = NES	0	-2.20738	-2.24329	139.459	196.447	141.395	689.775	688.067	826.611	703.045	691.151	865.829
AT2G02540	TCV < Mock = NES	0	-2.26682	-2.2433	33.3917	10.7153	23.724	136.14	99.3086	91.1094	91.1679	130.206	99.9033
AT2G22795	TCV < Mock < NES	0	-3.70751	-2.24398	489.09	374.142	665.222	6293.07	7192.78	6482.02	2186.28	2471.64	2582.5
AT5G19090	TCV < Mock < NES	0	-3.64858	-2.24512	233.742	141.085	461.195	3310.47	3687.42	3487.01	1038.79	1576.85	1347.86
AT3G55420	TCV < Mock < NES	0	-3.65991	-2.24568	44.1949	40.1823	132.855	754.442	1064.02	927.66	275.257	333.842	421.259
AT2G41310	TCV < Mock = NES	0	-2.04862	-2.24684	438.02	492.01	543.738	1881	2385.77	1830.47	1917.16	2507.22	2570.85
AT5G09650	TCV < Mock < NES	0	-2.89813	-2.24859	1837.53	1707.3	1644.55	12034.8	15881.1	10769.1	7207.53	8483.83	8969.65
AT1G28010	TCV < Mock < NES	0	-4.94586	-2.25072	78.5687	79.4717	120.516	3577.77	2822.02	2186.63	462.864	502.484	360.473
AT3G49970	TCV < Mock < NES	0	-5.17316	-2.25126	0.982109	0.89294	6.64273	102.105	96.9441	109.331	7.88953	21.9533	10.8229
AT5G05590	TCV < Mock < NES	0	-2.81587	-2.25269	49.0711	38.15	47.1539	362.153	279.42	304.799	215.904	249.478	175.124
AT2G38010	TCV < Mock < NES	0	-3.41827	-2.25404	94.2824	86.6152	165.119	1323.96	854.763	1520.7	511.943	577.6	561.124
AT5G11460	TCV < NES < Mock	0	-1.57228	-2.25585	113.925	150.014	149.936	411.823	336.94	482.052	618.013	632.861	725.964
AT5G15510	TCV < Mock < NES	0	-3.11033	-2.25613	9.82109	9.82234	15.1834	108.912	99.3086	92.766	53.4735	60.5609	52.4492
AT4G23290	TCV < Mock < NES	0	-4.77564	-2.25699	137.495	106.26	64.5294	2465.27	2887.04	3092.75	457.593	529.908	486.196
AT3G60390	TCV < Mock = NES	0	-2.56622	-2.2627	39.2843	12.5012	69.2742	251.859	256.547	208.723	199.868	226.346	154.85
AT5G41040	TCV < Mock < NES	0	-4.42536	-2.26397	5.89265	11.6082	0.948961	153.157	122.954	120.927	24.5452	24.2244	39.9613
AT3G05800	TCV < Mock < NES	0	-3.71078	-2.2642	16.6958	16.0729	40.8053	299.508	367.678	296.52	134.122	112.038	107.396
AT5G41060	TCV < Mock < NES	0	-3.39711	-2.26906	45.177	33.9317	94.8961	484.431	729.445	619.544	227.92	293.72	317.193
AT1G53800	TCV < Mock < NES	0	-2.79372	-2.27028	401.682	310.743	425.135	2490.23	3032.46	2365.53	1972.38	1997	1518.53
AT2G41950	TCV < Mock < NES	0	-3.11579	-2.27112	133.567	92.8658	122.416	928.02	1125.5	970.729	517.203	563.216	603.582
AT2G36050	TCV < Mock < NES	0	-2.92487	-2.27142	13.7495	9.82234	16.1323	80.5494	121.771	99.3921	64.8695	62.8319	64.1046
AT3G52840	TCV < Mock < NES	0	-3.4697	-2.27277	296.597	351.818	407.104	3917.43	4160.32	3616.22	1903.13	1635.14	1562.65
AT1G69700	TCV < Mock < NES	0	-3.35667	-2.27329	206.243	149.121	334.034	2270.13	2511.09	2281.05	754.765	1187.75	1390.32
AT5G51720	TCV < Mock < NES	0	-4.70939	-2.27587	140.442	40.1823	525.725	6207.98	6427.87	5844.25	1188.69	899.329	1332.88
AT1G10370	TCV < Mock < NES	0	-4.77873	-2.28277	323.114	175.909	215.414	6370.21	6595.75	6646.02	1006.35	841.04	1629.26
ATCG01020	TCV < Mock < NES	0	-3.4763	-2.28419	10.8032	25.0023	10.4386	165.637	231.72	117.614	85.0316	70.4021	69.9323
AT4G24510	TCV < Mock < NES	0	-4.97144	-2.28539	49.1054	156.265	251.475	3917.43	5418.23	4997.77	643.435	756.254	827.532
AT3G50660	TCV < Mock < NES	0	-2.54042	-2.28851	172.851	137.513	151.834	886.044	890.231	912.751	710.935	847.096	700.156
AT5G55570	TCV < Mock < NES	0	-5.23491	-2.28908	3.92843	1.78588	3.79585	152.023	102.855	104.362	17.5323	9.08414	19.9807
AT4G02800	TCV < Mock < NES	0	-3.81033	-2.29171	16.6958	28.5741	20.8771	357.367	327.482	243.511	74.5123	127.935	121.549
AT2G35210	TCV < Mock < NES	0	-4.06684	-2.29403	0	0.89294	6.64273	39.7075	39.0141	48.0395	8.76615	8.32712	19.9807
AT3G60840	TCV < Mock < NES	0	-3.04884	-2.29465	20.6243	27.6812	37.0095	258.666	197.435	250.137	113.96	166.542	138.2
AT5G10530	TCV < Mock < NES	0	-3.20009	-2.29658	8.83898	24.1094	11.3875	153.157	108.767	145.775	56.1033	88.5703	73.2624
AT1G26761	TCV < Mock < NES	0	-4.05383	-2.29668	96.2466	94.6517	92.9982	1574.68	1659.87	1480.94	442.69	468.59	483.699
AT3G62470	TCV < Mock = NES	0	-2.26975	-2.29707	70.5124	45.0488	59.6346	230.977	329.091	284.912	329.127	309.055	222.949
ATCG00810	TCV < Mock < NES	0	-3.05765	-2.29986	35.3559	33.0388	18.0303	238.245	302.655	178.906	127.986	137.019	160.678
AT4G35920	TCV < Mock < NES	0	-3.5847	-2.30096	219.992	178.588	369.146	3075.63	2923.69	3212.02	1100.15	1285.41	1397.81
AT5G06940	TCV < Mock < NES	0	-3.7366	-2.30122	0.982109	2.67882	7.59169	46.5145	42.5608	61.2918	24.5452	14.3832	16.6506
AT3G04700	TCV < Mock = NES	0	-2.80961	-2.30161	6.148	10.4537	6.0316	46.6313	63.9701	48.2598	36.2717	35.3532	40.077
AT2G17630	TCV < Mock < NES	0	-3.35644	-2.30426	21.6064	23.2164	49.346	285.894	364.132	314.742	137.629	179.412	148.19
AT5G35740	TCV < Mock < NES	0	-4.78377	-2.30931	4.91054	20.5376	16.1323	380.057	464.622	301.489	51.7203	87.0563	67.4347
AT2G44580	TCV < Mock < NES	0	-3.78156	-2.30999	7.85687	32.1459	15.1834	283.625	271.916	203.754	85.9082	86.2993	101.568
AT1G77855	TCV < Mock < NES	0	-3.50325	-2.31061	22.5885	4.4647	27.5199	170.175	243.543	205.41	89.4147	100.683	80.7552
AT4G12830	TCV < Mock < NES	0	-4.50107	-2.31312	165.976	80.3646	98.692	2642.25	2585.57	2585.85	557.527	517.039	640.214
AT4G12420	TCV < Mock < NES	0	-3.47574	-2.31373	610.871	566.124	1429.14	7864.35	13060.3	8068.98	3569.58	4633.67	4753.73
AT2G25270	TCV < Mock < NES	0	-4.25457	-2.31438	13.7495	10.7153	36.0605	366.443	365.314	424.073	73.6356	105.982	121.549
AT3G59680	TCV < Mock < NES	0	-3.09714	-2.31514	12.7674	15.18	26.5709	159.964	172.608	134.179	75.3889	87.8133	108.229
AT3G49670	TCV < Mock < NES	0	-4.50791	-2.31612	287.758	43.7541	420.39	5140.42	5775.27	6192.13	1141.35	1420.15	1183.02
AT1G17200	TCV < Mock < NES	0	-2.76605	-2.31646	127.674	79.4717	111.028	770.325	711.712	682.492	612.754	577.6	394.618
AT4G34580	TCV < Mock < NES	0	-4.64725	-2.31813	2.94633	5.35764	21.8261	172.444	321.571	261.733	34.188	45.4207	70.7648
AT3G26850	TCV < Mock = NES	0	-1.7833	-2.31855	230.796	159.836	217.312	749.904	777.917	564.878	1088.76	1151.41	792.566
AT1G09470	TCV < Mock < NES	0	-4.44268	-2.31956	1.96422	8.03646	6.64273	123.66	147.781	91.1094	18.4089	26.4954	38.2963
AT1G02950	TCV < Mock < NES	0	-3.3406	-2.32076	38.3022	8.03646	37.9585	276.818	299.108	278.298	118.343	143.075	159.845
[truncated: 2,133 more rows]

## Sheet: TCV-specific_UP_gProfiler
source	term_name	term_id	adjusted_p_value	negative_log10_of_adjusted_p_value	term_size	query_size	intersection_size	effective_domain_size	intersections
[truncated: 70 more rows]

[truncated: 1 more sheets: TCV-specific_DOWN_gProfiler]
