# Supplementary material for: Nuclear coat protein drives a multifaceted tolerance program during Turnip crinkle virus infection
Source: Research Square preprint supplement (doi:10.21203/rs.3.rs-8695072/v1), 2026-02-12
Supplement: Supplementary file 4 [file 6cc21c2f82080c196a0b4583.docx]

| **Cloning** | |
| --- | --- |
| Primer name | Sequence |
| pTWIST_CP_NES_SDM_F | CTGGACTTGACATCAACAAAACGTAGACCCAGCTTTCTTG |
| pTWIST_CP_NES_SDM_R | CCAACTTCAGTGCCAGTTCATTAATTCTGAGTGCTTGC |
| TCV_CP_NES_SDM_F | CTGGACTTGACATCAACAAAACGTAGTACGGTAATAGTGTAGTC |
| TCV_CP_NES_SDM_R | CCAACTTCAGTGCCAGTTCATTAATTCTGAGTGCTTGC |
|  |  |
| **RT-qPCR** | |
| Primer name | Sequence |
| At_EF1a_F | CCTTCGTCTTCCACTTCAGG |
| At_EF1a_R | GAGACTCGTGGTGCATCTCA |
| TCV_RdRp_qPCR_F | GTTGGCCGGAAATCATACCC |
| TCV_RdRp_qPCR_R | TGGAGCCGGGTCTTTCTTAG |
| Nb_Ubiq_qPCR_F | ATCCACCCGACCAGCAGAG |
| Nb_Ubiq_qPCR_R | TAGAAACCACCACGGAGACG |
| GFP_qPCR_F | GGCACGACTTCTTCAAGAGC |
| GFP_qPCR_R | AGGATGTTTCCGTCCTCCTT |

**Supplementary Table 9: Primers used in this study**
