# Supplementary material for: Nuclear coat protein drives a multifaceted tolerance program during Turnip crinkle virus infection
Source: Research Square preprint supplement (doi:10.21203/rs.3.rs-8695072/v1), 2026-02-12
Supplement: Supplementary file 5 [file 88d04d3553debaf222e5a53e.xlsx]

## Sheet: sid2-2NES_vs_Col0NES
User_ID	symbol	ensembl_ID	sid2TCV-Col0TCV_log2FC	sid2TCV-Col0TCV_adjPval	sid2NES-Col0NES_log2FC	sid2NES-Col0NES_adjPval	Direction
AT5G62360	AT5G62360	AT5G62360	5.08019	0.0128547	5.93058	0.00510123	Up
AT4G17470	AT4G17470	AT4G17470	3.15896	0.0181074	4.91174	3.1e-06	Up
AT1G24020	MLP423	AT1G24020	4.38757	0.0450499	4.14621	0.0474678	Up
AT1G72416	AT1G72416	AT1G72416	3.53576	0.0121075	3.53518	0.0100041	Up
AT4G30660	AT4G30660	AT4G30660	1.95056	0.00231266	1.65844	0.0177057	Up
AT5G39790	AT5G39790	AT5G39790	1.20472	0.0462917	1.18665	0.0326197	Up
AT4G10500	AT4G10500	AT4G10500	-6.6463	0.000221124	-6.52841	0.00068634	Down
AT3G11340	UGT76B1	AT3G11340	-8.25844	0.0193389	-6.3303	0.0494867	Down
AT1G14880	PCR1	AT1G14880	-8.60202	9.92e-08	-5.91055	0.00262566	Down
AT4G13890	EDA36	AT4G13890	-5.80807	0.0289746	-5.75046	0.0496298	Down
AT5G22570	WRKY38	AT5G22570	-6.81701	0.000231258	-5.56083	0.00267677	Down
AT3G57260	BGL2	AT3G57260	-3.74563	0.038365	-5.07555	0.0009991	Down
AT3G28510	AT3G28510	AT3G28510	-5.34161	0.0175719	-4.7666	0.0350276	Down
AT2G44380	AT2G44380	AT2G44380	-4.25101	0.0250315	-4.5309	0.0286171	Down
AT1G02450	NIMIN1	AT1G02450	-5.68701	0.00703761	-4.4152	0.0326197	Down
AT2G14560	LURP1	AT2G14560	-5.87345	0.000231258	-4.39094	0.0146039	Down
AT4G35180	LHT7	AT4G35180	-6.57426	0.00973695	-4.28148	0.0457581	Down
AT5G64810	WRKY51	AT5G64810	-4.5444	0.0226583	-4.217	0.0326197	Down
AT2G14610	PR1	AT2G14610	-8.33479	7.03e-08	-4.14706	0.0474678	Down
AT2G40750	WRKY54	AT2G40750	-4.63968	0.000221124	-3.38781	0.0122207	Down
AT3G25882	NIMIN-2	AT3G25882	-3.68761	0.0175719	-3.34008	0.0284138	Down
AT5G39050	PMAT1	AT5G39050	-2.36232	0.0250315	-2.62185	0.00708616	Down
AT1G16510	AT1G16510	AT1G16510	-3.05629	0.00692125	-2.60976	0.0341918	Down
AT1G59930	AT1G59930	AT1G59930	-3.2219	0.00172319	-2.47709	0.0364397	Down
AT2G20670	AT2G20670	AT2G20670	-2.88355	0.00448196	-2.27989	0.0396343	Down
AT4G28390	AAC3	AT4G28390	-2.22018	0.0379627	-2.13705	0.0364397	Down
AT4G32870	AT4G32870	AT4G32870	-1.76719	0.0379627	-1.76879	0.0271928	Down
AT2G35940	BLH1	AT2G35940	-1.32382	0.025563	-1.32331	0.0182893	Down
AT5G27600	LACS7	AT5G27600	-1.03806	0.0478818	-1.16333	0.0123088	Down
AT1G01060	LHY	AT1G01060	-1.13987	0.000720356	-1.16015	0.000384796	Down

## Sheet: rbohDNES_vs_Col0NES
User_ID	symbol	ensembl_ID	rbohDTCV-Col0TCV_log2FC	rbohDTCV-Col0TCV_adjPval	rbohDNES-Col0NES_log2FC	rbohDNES-Col0NES_adjPval	Direction
AT5G08150	SOB5	AT5G08150	2.73185	0.0241079	3.28923	0.0013907	Up
AT3G57645	U2.2	AT3G57645	2.39459	0.0140876	2.8282	0.00927576	Up
AT3G41761	AT3G41761	AT3G41761	2.40951	0.0305019	2.80837	0.0105269	Up
AT1G05057	U2.14	AT1G05057	2.53624	0.00289638	2.78026	0.00319545	Up
AT4G03995	U2.9	AT4G03995	2.27599	0.000365639	2.714	0.000222762	Up
AT5G09065	AT5G09065	AT5G09065	2.08342	0.0218086	2.65192	0.00155371	Up
AT2G47440	AT2G47440	AT2G47440	1.50719	0.0255221	1.80862	0.00211028	Up
AT5G09595	AT5G09595	AT5G09595	1.35211	0.0199431	1.79496	0.000181429	Up
AT1G76090	SMT3	AT1G76090	1.85745	0.0150618	1.71009	0.0189845	Up
AT2G17230	EXL5	AT2G17230	2.10905	0.00433926	1.51628	0.0498715	Up
AT1G72790	AT1G72790	AT1G72790	1.74349	0.0172795	1.4841	0.0367938	Up
AT1G22530	PATL2	AT1G22530	1.77052	0.00538551	1.39148	0.0306625	Up
AT2G35880	AT2G35880	AT2G35880	1.30386	0.00805512	1.37456	0.00185874	Up
AT3G54810	BME3	AT3G54810	2.37554	2.79e-08	1.34011	0.00505194	Up
AT3G19680	AT3G19680	AT3G19680	2.05585	0.000101738	1.1844	0.0476819	Up
AT5G58530	AT5G58530	AT5G58530	1.04893	0.0492057	1.10503	0.0128663	Up
AT4G08425	AT4G08425	AT4G08425	1.15459	0.036329	1.09676	0.0236266	Up
AT4G26810	AT4G26810	AT4G26810	1.31956	0.000721461	1.06918	0.00488485	Up
AT4G24805	AT4G24805	AT4G24805	1.00429	0.0338298	1.05213	0.0135966	Up
AT1G09487	AT1G09487	AT1G09487	1.14069	0.0336571	1.04797	0.0143933	Up
AT5G28300	AT5G28300	AT5G28300	1.15699	0.0356398	1.04515	0.0487664	Up
AT3G52420	OEP7	AT3G52420	1.24122	9.18e-09	1.02842	9.89e-07	Up
AT3G59840	AT3G59840	AT3G59840	1.05899	0.0110111	1.00602	0.00966421	Up
AT4G22490	AT4G22490	AT4G22490	-18.0028	2.67e-06	-17.7796	3.27e-06	Down
AT3G44990	XTH31	AT3G44990	-3.31681	0.0477278	-5.84093	7.39e-05	Down
AT4G06598	AT4G06598	AT4G06598	-5.15348	0.00502484	-2.66815	0.0024521	Down
AT3G62950	AT3G62950	AT3G62950	-3.42947	0.00264027	-2.27841	0.039105	Down
AT1G66540	AT1G66540	AT1G66540	-1.01148	0.0478952	-1.69746	3.47e-05	Down
ATCG00710	psbH	ATCG00710	-1.82952	0.0254169	-1.60017	0.0344212	Down
AT2G42750	AT2G42750	AT2G42750	-1.75531	0.000417917	-1.58828	0.00104663	Down
AT5G56180	ARP8	AT5G56180	-1.17865	0.0493796	-1.56396	0.00281416	Down
ATCG00480	atpB	ATCG00480	-1.86366	6.14e-05	-1.55806	0.000880294	Down
AT5G49230	HRB1	AT5G49230	-1.07608	0.00142977	-1.39494	8.69e-07	Down
AT5G56600	PRF3	AT5G56600	-1.45906	0.00491482	-1.37609	0.00435574	Down
AT3G04240	SEC	AT3G04240	-1.07865	0.0188464	-1.37607	0.000432351	Down
AT4G20070	AAH	AT4G20070	-1.35653	0.0264558	-1.34626	0.00789352	Down
AT5G49950	AT5G49950	AT5G49950	-1.01695	0.0191099	-1.32992	0.000221323	Down
AT1G65230	AT1G65230	AT1G65230	-1.10341	0.0380707	-1.23747	0.00809981	Down
ATCG00560	psbL	ATCG00560	-1.77328	0.00129761	-1.18529	0.0447972	Down
AT3G52526	AT3G52526	AT3G52526	-1.03866	0.00694608	-1.17284	0.000127756	Down
AT4G17840	AT4G17840	AT4G17840	-1.25502	0.0286081	-1.13963	0.0365986	Down
AT5G58870	ftsh9	AT5G58870	-1.11798	0.000383605	-1.04716	0.000404235	Down
AT5G07020	AT5G07020	AT5G07020	-1.0249	0.00288465	-1.04399	0.00110306	Down
AT5G16650	AT5G16650	AT5G16650	-1.2018	3.05e-05	-1.03602	0.000272805	Down
AT4G13550	AT4G13550	AT4G13550	-1.11019	0.0229493	-1.01205	0.0160053	Down
AT5G48930	HCT	AT5G48930	-1.11121	0.0158039	-1.00513	0.0223928	Down

## Sheet: rbohFNES_vs_Col0NES
User_ID	symbol	ensembl_ID	rbohFTCV-Col0TCV_log2FC	rbohFTCV-Col0TCV_adjPval	rbohFNES-Col0NES_log2FC	rbohFNES-Col0NES_adjPval	Direction
AT3G59620	AT3G59620	AT3G59620	6.77682	0.0161771	8.2021	0.000935143	Up
AT4G29030	AT4G29030	AT4G29030	18.2225	2.58e-08	7.40655	0.0184371	Up
AT1G66390	MYB90	AT1G66390	3.45911	0.0440769	4.33085	0.00516196	Up
AT1G70270	AT1G70270	AT1G70270	6.43221	0.00614747	4.21728	0.0111762	Up
AT1G19373	AT1G19373	AT1G19373	5.03002	0.00846451	3.75168	0.0170961	Up
AT4G19430	AT4G19430	AT4G19430	5.50391	0.00745009	3.7195	0.0473345	Up
AT5G56980	AT5G56980	AT5G56980	2.20456	0.0162719	2.72867	0.000679714	Up
AT1G66380	MYB114	AT1G66380	2.83394	0.0415524	2.57966	0.0391063	Up
AT5G62865	AT5G62865	AT5G62865	1.68815	0.0359025	2.28868	0.000691491	Up
AT5G43620	AT5G43620	AT5G43620	1.98938	0.0131248	2.15107	0.00256176	Up
AT1G68600	AT1G68600	AT1G68600	2.28975	0.0223708	2.08798	0.024027	Up
AT3G56705	U2.6 AT3G56705	AT3G56705	2.78798	2.91e-05	2.07561	0.00344036	Up
AT5G09065	AT5G09065	AT5G09065	2.3056	0.00581283	2.04782	0.0175511	Up
AT1G05057	U2.14	AT1G05057	2.60045	0.00154145	2.04238	0.0379756	Up
AT4G03995	U2.9	AT4G03995	2.24637	0.000382449	2.03601	0.00848484	Up
AT1G04733	U2.11	AT1G04733	2.25637	0.00111384	1.89555	0.00669975	Up
AT4G37730	bZIP7	AT4G37730	4.92681	0.00799645	1.88127	0.0283597	Up
AT1G28230	PUP1	AT1G28230	1.80511	0.0153743	1.82501	0.00714722	Up
AT5G18150	AT5G18150	AT5G18150	1.00789	0.0229358	1.58755	1.24e-05	Up
AT5G09595	AT5G09595	AT5G09595	1.2699	0.0274066	1.50422	0.0019093	Up
AT5G54075	U3D	AT5G54075	1.53809	0.0270168	1.5037	0.0221747	Up
AT1G09800	AT1G09800	AT1G09800	2.05271	0.000606897	1.4929	0.0163852	Up
AT2G28550	RAP2.7	AT2G28550	1.42866	0.0360855	1.38679	0.0253428	Up
ATMG01190	atp1	ATMG01190	1.24032	0.0286763	1.36894	0.00580715	Up
AT5G50160	FRO8	AT5G50160	1.23376	0.0216062	1.26057	0.00938905	Up
AT2G20410	AT2G20410	AT2G20410	1.7656	1.45e-06	1.17821	0.00257077	Up
AT1G08973	AT1G08973	AT1G08973	1.09988	0.0234571	1.15421	0.00776872	Up
AT4G39364	AT4G39364	AT4G39364	1.47004	0.0289485	1.10551	0.0356715	Up
AT5G17280	AT5G17280	AT5G17280	1.0217	7.55e-05	1.07278	6.8e-06	Up
AT3G19508	AT3G19508	AT3G19508	1.10006	0.0145143	1.0649	0.00934917	Up
AT1G09250	AT1G09250	AT1G09250	1.42525	0.000430716	1.03597	0.0103711	Up
AT3G13780	AT3G13780	AT3G13780	1.1613	0.0462905	1.01806	0.037296	Up
AT3G12920	BRG3	AT3G12920	1.04909	0.0111939	1.01755	0.00552299	Up
AT5G47430	AT5G47430	AT5G47430	1.04038	0.00948894	1.01296	0.0063059	Up
AT2G15128	AT2G15128	AT2G15128	-3.43102	0.0179973	-3.11452	0.00734507	Down
AT3G15356	AT3G15356	AT3G15356	-4.13461	1.21e-05	-2.7562	0.00456933	Down
AT3G62930	AT3G62930	AT3G62930	-3.71768	0.000621558	-2.18425	0.0325058	Down
AT3G45160	AT3G45160	AT3G45160	-2.55861	0.00493268	-1.81264	0.0278489	Down
AT3G29631	AT3G29631	AT3G29631	-2.67379	8.71e-05	-1.60444	0.0314753	Down
AT1G12900	GAPA-2	AT1G12900	-1.48358	0.00953508	-1.5726	0.00275775	Down
AT5G05580	FAD8	AT5G05580	-1.42826	0.0431578	-1.45801	0.018906	Down
AT1G19150	Lhca6	AT1G19150	-1.6127	0.0353819	-1.4358	0.0424813	Down
AT5G02160	AT5G02160	AT5G02160	-1.23671	0.0431928	-1.43147	0.00734195	Down
AT5G11420	AT5G11420	AT5G11420	-1.5557	0.029926	-1.43136	0.0304778	Down
AT4G16008	AT4G16008	AT4G16008	-2.08943	0.000650851	-1.41535	0.0225314	Down
AT1G15980	PnsB1	AT1G15980	-1.15016	0.0450557	-1.41534	0.00382683	Down
AT1G65230	AT1G65230	AT1G65230	-1.30585	0.00710733	-1.36552	0.00173704	Down
AT5G39530	AT5G39530	AT5G39530	-1.45379	0.00465595	-1.31655	0.00666154	Down
AT2G35260	AT2G35260	AT2G35260	-1.45289	1.75e-05	-1.29881	7.27e-05	Down
AT5G35790	G6PD1	AT5G35790	-1.64891	0.00510883	-1.23746	0.0325321	Down
AT1G07720	KCS3	AT1G07720	-1.21135	0.0379548	-1.22667	0.0178064	Down
AT1G49380	AT1G49380	AT1G49380	-1.16317	0.00816321	-1.22394	0.00139251	Down
ATCG00560	psbL	ATCG00560	-2.06835	6.76e-05	-1.20958	0.027556	Down
AT3G52840	BGAL2	AT3G52840	-2.0014	4.73e-07	-1.18909	0.00178131	Down
AT5G39080	AT5G39080	AT5G39080	-1.40312	0.013207	-1.17222	0.0276241	Down
AT3G15850	FAD5	AT3G15850	-1.2023	0.0335805	-1.15874	0.0243258	Down
AT4G22756	SMO1-2	AT4G22756	-1.18714	0.0374229	-1.14816	0.0254417	Down
AT5G48730	AT5G48730	AT5G48730	-1.24797	0.00558042	-1.12286	0.00155567	Down
AT1G26130	AT1G26130	AT1G26130	-1.43315	0.0161771	-1.06592	0.0345991	Down
AT1G18460	AT1G18460	AT1G18460	-1.39678	0.000466875	-1.04901	0.00531213	Down

## Sheet: rbohD rbohFNES_vs_Col0NES
User_ID	symbol	ensembl_ID	rbohDFTCV-Col0TCV_log2FC	rbohDFTCV-Col0TCV_adjPval	rbohDFNES-Col0NES_log2FC	rbohDFNES-Col0NES_adjPval	Direction
AT5G44310	AT5G44310	AT5G44310	9.97319	4.64e-05	7.77156	0.00222601	Up
AT3G15670	AT3G15670	AT3G15670	6.31872	0.00369227	7.63329	0.000398548	Up
AT5G66780	AT5G66780	AT5G66780	7.83251	0.000888472	6.94476	0.00976258	Up
AT2G35300	LEA18	AT2G35300	9.42103	9.26e-08	6.64143	0.00148321	Up
AT4G31830	AT4G31830	AT4G31830	10.449	5.57e-09	5.62527	0.00375405	Up
AT1G45616	RLP6	AT1G45616	4.19187	0.0239335	5.19418	0.00459002	Up
AT3G27025	AT3G27025	AT3G27025	4.22542	0.00314271	4.9344	0.000711878	Up
AT4G37220	AT4G37220	AT4G37220	3.22158	0.00147684	4.8202	2.17e-05	Up
AT4G33020	ZIP9	AT4G33020	2.64932	0.0491691	4.70863	0.00728122	Up
AT1G77200	AT1G77200	AT1G77200	2.95744	0.0134345	4.65039	4.83e-07	Up
AT3G57010	AT3G57010	AT3G57010	7.3297	8.08e-12	4.5844	2.19e-05	Up
AT1G06667	AT1G06667	AT1G06667	5.1438	0.00532169	4.57074	0.0155725	Up
AT4G12580	AT4G12580	AT4G12580	6.0852	4.89e-09	4.53545	8.1e-06	Up
AT3G28007	SWEET4	AT3G28007	5.21871	5.87e-10	4.40692	2e-07	Up
AT2G29370	AT2G29370	AT2G29370	3.33289	0.00033498	4.37965	0.00432853	Up
AT2G43590	AT2G43590	AT2G43590	2.61387	0.0362613	4.37745	0.000350352	Up
AT2G47275	ath-MIR403	AT2G47275	3.23908	0.00614067	4.13222	0.00989745	Up
AT3G48510	AT3G48510	AT3G48510	6.72281	9.89e-05	4.09939	0.000612976	Up
AT4G39360	AT4G39360	AT4G39360	3.16607	0.0386884	4.07649	0.0463161	Up
AT4G40010	SNRK2.7	AT4G40010	4.46922	1.34e-06	4.07411	1.12e-05	Up
AT1G19190	AT1G19190	AT1G19190	3.07052	0.00189628	3.96867	0.0283165	Up
AT1G16850	AT1G16850	AT1G16850	5.97215	1.19e-13	3.90502	1.75e-06	Up
AT3G24612	AT3G24612	AT3G24612	3.16059	0.0482152	3.86076	0.0262866	Up
AT3G55910	AT3G55910	AT3G55910	2.36503	0.00596991	3.747	0.0299548	Up
AT3G16120	AT3G16120	AT3G16120	3.92601	0.00322408	3.7118	0.00218954	Up
AT2G33380	RD20	AT2G33380	2.32969	5.5e-05	3.70612	4.52e-11	Up
AT2G47780	AT2G47780	AT2G47780	3.0137	1.18e-06	3.68063	4.1e-10	Up
AT4G06320	AT4G06320	AT4G06320	7.14708	4.51e-06	3.66028	0.0186616	Up
AT5G22460	AT5G22460	AT5G22460	4.05014	2.97e-09	3.62412	1.24e-07	Up
AT5G23980	FRO4	AT5G23980	2.92018	0.0116474	3.57492	0.00243097	Up
AT5G07990	TT7	AT5G07990	6.58719	3.18e-14	3.45599	0.000207853	Up
AT3G15280	AT3G15280	AT3G15280	3.11525	0.00650174	3.44253	0.00176277	Up
AT4G40070	AT4G40070	AT4G40070	2.95066	0.000420274	3.29672	7.86e-07	Up
AT1G17744	AT1G17744	AT1G17744	3.29832	0.0161762	3.29457	0.0270186	Up
AT1G04220	KCS2	AT1G04220	2.46538	0.00106821	3.25463	8.71e-06	Up
AT1G08107	AT1G08107	AT1G08107	4.30693	0.0108783	3.23485	0.0161217	Up
AT5G66460	MAN7	AT5G66460	1.93836	0.000623832	3.16999	5.99e-09	Up
AT4G19230	CYP707A1	AT4G19230	4.24646	1.35e-08	3.16745	3.38e-05	Up
AT4G00670	AT4G00670	AT4G00670	3.04607	0.00146418	3.1341	0.00104442	Up
AT3G23930	AT3G23930	AT3G23930	2.31007	0.00197455	3.12982	2.43e-05	Up
AT3G04775	AT3G04775	AT3G04775	3.73344	0.000277991	3.12658	0.0188211	Up
AT2G34850	MEE25	AT2G34850	4.61549	5.4e-05	3.10424	0.0010895	Up
AT5G47670	NF-YB6	AT5G47670	2.08954	0.000425184	3.0924	0.0300301	Up
ATMG00640	ATMG00640	ATMG00640	2.96506	0.000448274	3.0472	0.000665953	Up
AT2G02120	PDF2.1	AT2G02120	8.8023	8.03e-10	2.94613	0.0165193	Up
AT4G05100	MYB74	AT4G05100	3.35365	0.00170272	2.93695	0.00798411	Up
AT1G23050	AT1G23050	AT1G23050	1.93501	0.00906762	2.93161	0.00017458	Up
AT3G02445	AT3G02445	AT3G02445	2.91994	0.00227889	2.92399	0.00144405	Up
AT5G02640	AT5G02640	AT5G02640	1.34866	0.0496193	2.90032	1.05e-06	Up
AT2G46940	AT2G46940	AT2G46940	3.06395	0.00047304	2.88798	0.00131569	Up
AT1G17190	GSTU26	AT1G17190	1.80669	0.00877114	2.88743	4.56e-06	Up
AT2G39240	AT2G39240	AT2G39240	3.43385	5.42e-05	2.87361	0.00378057	Up
AT4G01110	AT4G01110	AT4G01110	1.79957	0.0220383	2.85859	1.25e-05	Up
AT3G51238	AT3G51238	AT3G51238	3.13469	0.00102551	2.84579	0.00317119	Up
AT4G05285	AT4G05285	AT4G05285	4.9431	0.00281603	2.84247	0.0267044	Up
AT1G20490	AT1G20490	AT1G20490	3.21447	0.00240956	2.82874	0.00245961	Up
AT3G24520	HSFC1	AT3G24520	2.11649	0.00859694	2.81738	0.000299355	Up
AT5G25240	AT5G25240	AT5G25240	2.71678	0.000273084	2.81614	0.000192517	Up
AT1G25422	AT1G25422	AT1G25422	3.13324	0.0272001	2.80819	0.0296435	Up
AT4G31398	AT4G31398	AT4G31398	2.99641	4.65e-05	2.7976	0.00139309	Up
AT4G17030	EXLB1	AT4G17030	3.35317	0.000601717	2.7916	0.005247	Up
AT3G02435	AT3G02435	AT3G02435	3.27116	0.00401992	2.78725	0.00604097	Up
AT1G44800	SIAR1	AT1G44800	2.12482	0.0479949	2.76627	0.00945473	Up
AT2G45600	AT2G45600	AT2G45600	1.38531	0.00900889	2.75314	2.53e-08	Up
AT1G66500	AT1G66500	AT1G66500	2.17976	0.00305811	2.67407	0.000276247	Up
AT1G52890	NAC019	AT1G52890	3.07013	0.00255749	2.67284	0.0128822	Up
AT3G03480	CHAT	AT3G03480	3.65765	1.5e-06	2.66453	0.00225594	Up
AT2G37260	TTG2	AT2G37260	4.09933	2.25e-05	2.66081	0.00921668	Up
AT1G52565	AT1G52565	AT1G52565	2.88486	0.00129208	2.64645	0.00478902	Up
AT5G02020	SIS	AT5G02020	4.59175	7.51e-08	2.6194	0.00422674	Up
AT4G27410	RD26	AT4G27410	2.59654	0.00863758	2.61228	0.0094536	Up
AT2G30362	AT2G30362	AT2G30362	1.85828	0.0139486	2.59321	0.00385122	Up
AT4G22270	MRB1	AT4G22270	2.64734	2.31e-09	2.55313	5.07e-09	Up
AT2G39250	SNZ	AT2G39250	2.08573	0.000479555	2.53409	1.4e-05	Up
AT2G38400	AGT3	AT2G38400	3.50207	2.01e-07	2.53304	0.000340733	Up
AT5G17450	HIPP21	AT5G17450	2.32101	1.26e-06	2.52434	1.49e-07	Up
AT1G75300	AT1G75300	AT1G75300	1.70848	0.0173818	2.52037	0.000305434	Up
AT5G59340	WOX2	AT5G59340	3.10627	0.0068656	2.51145	0.0216929	Up
AT4G31354	AT4G31354	AT4G31354	3.90675	1.44e-05	2.50831	0.0218641	Up
AT4G06315	AT4G06315	AT4G06315	2.46541	0.0101784	2.49366	0.0323294	Up
AT2G40435	AT2G40435	AT2G40435	2.3648	0.00025838	2.48966	0.000143213	Up
AT4G30490	AT4G30490	AT4G30490	1.24286	0.0193845	2.48845	8e-07	Up
AT2G37880	AT2G37880	AT2G37880	4.2991	0.00133746	2.48839	0.0367427	Up
AT1G01240	AT1G01240	AT1G01240	1.73322	0.00129182	2.48123	3.45e-06	Up
AT5G65207	AT5G65207	AT5G65207	2.23824	0.00221281	2.45345	0.000881871	Up
AT3G51895	SULTR3;1	AT3G51895	1.68335	0.000131923	2.44838	1.2e-08	Up
AT1G62370	AT1G62370	AT1G62370	4.0466	1.91e-06	2.44438	0.00907203	Up
ATMG00560	rpl2 ATMG00560	ATMG00560	2.73838	0.000109887	2.42375	0.00358006	Up
AT4G12430	TPPF	AT4G12430	3.02416	1.04e-06	2.42338	0.000115743	Up
AT1G12060	BAG5	AT1G12060	1.25552	0.00691341	2.41781	2.66e-09	Up
AT4G15620	AT4G15620	AT4G15620	1.89992	0.00390349	2.39218	0.000218459	Up
AT2G23000	scpl10	AT2G23000	3.35552	8.23e-07	2.38253	0.000757056	Up
AT1G62570	FMO GS-OX4	AT1G62570	2.19906	0.000127746	2.38115	1.31e-05	Up
AT3G21240	4CL2	AT3G21240	1.57131	0.00905556	2.36952	7.02e-05	Up
AT5G06475	AT5G06475	AT5G06475	3.00189	0.0201222	2.36151	0.00444837	Up
AT5G05270	CHIL	AT5G05270	3.01378	0.00375537	2.35948	0.0298286	Up
AT3G48790	AT3G48790	AT3G48790	1.62895	0.0444976	2.35929	0.0177699	Up
AT1G75960	AT1G75960	AT1G75960	2.23246	0.00281917	2.35927	0.0267406	Up
AT5G10830	AT5G10830	AT5G10830	2.36904	4.13e-05	2.34595	4.76e-05	Up
AT3G09775	AT3G09775	AT3G09775	2.03966	0.000906412	2.34335	1.24e-05	Up
AT5G43620	AT5G43620	AT5G43620	1.79788	0.0063047	2.33749	0.000221484	Up
AT5G23950	AT5G23950	AT5G23950	2.10429	0.000232046	2.32562	0.00692186	Up
AT3G61420	AT3G61420	AT3G61420	1.2881	0.00206241	2.31248	7.3e-09	Up
AT2G28250	NCRK	AT2G28250	2.52286	0.00157049	2.2954	0.00394579	Up
AT5G65230	MYB53	AT5G65230	2.06175	0.0205596	2.29501	0.0198878	Up
AT5G65280	GCL1	AT5G65280	2.32421	0.000178531	2.29457	0.000222074	Up
AT1G07590	AT1G07590	AT1G07590	1.74203	0.0278807	2.29124	0.00339686	Up
AT4G04465	AT4G04465	AT4G04465	4.43159	0.000197289	2.28886	0.0335454	Up
AT3G62590	AT3G62590	AT3G62590	2.20629	0.00289582	2.28063	0.00280551	Up
AT3G55310	AT3G55310	AT3G55310	1.60605	0.0497857	2.24235	0.0118687	Up
AT4G39361	AT4G39361	AT4G39361	3.29781	0.000958101	2.23754	0.0269528	Up
AT2G41050	AT2G41050	AT2G41050	2.5373	0.00157923	2.23082	0.000451869	Up
AT3G51240	F3H	AT3G51240	4.14901	3.23e-10	2.22527	0.00146573	Up
AT3G28370	AT3G28370	AT3G28370	2.35062	0.000666178	2.22365	0.00153963	Up
AT1G76690	OPR2	AT1G76690	2.8224	4.93e-06	2.21508	0.00070438	Up
ATMG00070	ATMG00070	ATMG00070	2.24007	0.000580692	2.21315	0.000906636	Up
AT4G03925	AT4G03925	AT4G03925	2.71125	0.00374572	2.20715	0.0228818	Up
AT5G43380	TOPP6	AT5G43380	3.51597	8.73e-09	2.18406	0.000730011	Up
AT1G24600	AT1G24600	AT1G24600	3.97263	5.07e-09	2.16316	0.00308883	Up
AT2G36950	AT2G36950	AT2G36950	3.45562	1.65e-10	2.15318	0.000150539	Up
AT1G29195	AT1G29195	AT1G29195	1.14728	0.0259942	2.15076	1.31e-05	Up
AT4G37730	bZIP7	AT4G37730	6.44046	5.7e-06	2.14352	0.00360139	Up
AT5G03700	AT5G03700	AT5G03700	1.51429	0.0110529	2.13405	0.000456649	Up
AT1G17920	HDG12	AT1G17920	2.1112	0.00720508	2.11523	0.00724303	Up
AT4G24010	CSLG1	AT4G24010	2.93514	0.000857035	2.1142	0.0160732	Up
AT2G48090	AT2G48090	AT2G48090	1.99492	0.00264696	2.1141	0.00589697	Up
AT1G01570	AT1G01570	AT1G01570	2.29289	0.000319766	2.10961	0.000865779	Up
AT3G51300	ROP1	AT3G51300	3.78746	5.75e-06	2.09846	0.02332	Up
AT2G20770	GCL2	AT2G20770	2.57312	0.000927215	2.08987	0.00593161	Up
AT5G63580	FLS2 AT5G63580	AT5G63580	1.33704	0.0136845	2.07382	9.5e-06	Up
AT5G49700	AT5G49700	AT5G49700	2.75761	0.000452678	2.05739	0.0185356	Up
AT1G74010	AT1G74010	AT1G74010	2.47452	0.00105669	2.01194	0.016644	Up
AT3G51750	AT3G51750	AT3G51750	2.80516	3.95e-07	2.00075	0.00040649	Up
AT1G62800	ASP4	AT1G62800	2.81808	0.000305305	1.99738	0.0143372	Up
AT3G55120	TT5	AT3G55120	3.38926	4.84e-07	1.97454	0.00578042	Up
AT3G16800	AT3G16800	AT3G16800	4.23229	3.2e-13	1.96385	0.00145574	Up
AT3G22840	ELIP1	AT3G22840	4.8012	5.55e-14	1.94579	0.00498425	Up
AT5G63800	MUM2	AT5G63800	1.43951	0.0403628	1.94	0.00502989	Up
AT2G35060	KUP11	AT2G35060	1.24176	0.00171601	1.93456	3.61e-07	Up
AT5G25620	YUC6	AT5G25620	1.59485	0.00504166	1.90928	0.000115743	Up
AT1G22710	SUC2	AT1G22710	1.60718	4.75e-05	1.90739	1.11e-06	Up
AT5G28910	AT5G28910	AT5G28910	1.74775	0.0188361	1.89753	0.00115965	Up
AT5G14960	DEL2	AT5G14960	2.24424	0.00775575	1.89629	0.0241845	Up
AT4G24130	AT4G24130	AT4G24130	2.32159	0.00236224	1.88004	0.0122652	Up
AT5G10946	AT5G10946	AT5G10946	1.74361	0.00790063	1.86722	0.00558952	Up
AT5G65870	PSK5	AT5G65870	1.69871	0.0103839	1.86517	0.00512443	Up
AT3G19660	AT3G19660	AT3G19660	1.95224	0.00020342	1.85468	0.000765032	Up
AT3G58710	WRKY69	AT3G58710	2.55374	4.97e-08	1.83346	0.000545427	Up
AT5G16200	AT5G16200	AT5G16200	2.20416	3.71e-07	1.83169	2.65e-05	Up
AT3G25290	AT3G25290	AT3G25290	2.6474	2.74e-05	1.8094	0.00690991	Up
ATMG00160	cox2	ATMG00160	1.6741	0.0159464	1.80076	0.0094407	Up
AT3G02410	ICME-LIKE2	AT3G02410	2.83006	0.000600378	1.79844	0.0372404	Up
AT5G38690	AT5G38690	AT5G38690	1.15334	0.0277887	1.78782	0.000522012	Up
AT3G53650	AT3G53650	AT3G53650	3.06872	1.6e-05	1.78699	0.0221905	Up
AT1G44170	ALDH3H1	AT1G44170	1.11713	0.000226994	1.78462	7.29e-10	Up
AT3G15790	MBD11	AT3G15790	1.13756	0.000424778	1.77794	1.06e-08	Up
AT1G07720	KCS3	AT1G07720	1.03563	0.0229301	1.7766	4.28e-05	Up
AT4G20300	AT4G20300	AT4G20300	1.37816	1.64e-10	1.76966	1.39e-17	Up
AT4G05631	AT4G05631	AT4G05631	1.82381	0.0135093	1.764	0.0107685	Up
AT5G48880	KAT5	AT5G48880	2.66438	7.69e-05	1.76357	0.0130579	Up
AT5G13880	AT5G13880	AT5G13880	2.98976	3.34e-08	1.76344	0.000886357	Up
AT1G09877	AT1G09877	AT1G09877	4.0769	1.82e-06	1.75252	0.0418244	Up
AT1G48500	JAZ4	AT1G48500	2.74857	0.00030827	1.73915	0.0166245	Up
AT2G46550	AT2G46550	AT2G46550	1.38538	1.76e-06	1.73465	3.99e-09	Up
AT1G54120	AT1G54120	AT1G54120	3.14369	6.15e-05	1.71916	0.026708	Up
AT1G63010	AT1G63010	AT1G63010	1.39577	1.99e-07	1.70687	1.2e-10	Up
AT3G53730	AT3G53730	AT3G53730	2.52532	6.78e-09	1.70433	0.000164677	Up
AT5G22270	AT5G22270	AT5G22270	1.35496	0.0339064	1.70266	0.00737761	Up
AT2G07715	AT2G07715	AT2G07715	2.82434	7.48e-06	1.69679	0.010996	Up
AT3G19500	AT3G19500	AT3G19500	2.68301	0.000609846	1.6946	0.0387578	Up
AT4G22240	AT4G22240	AT4G22240	1.25117	0.000245628	1.67872	5.56e-07	Up
AT2G27990	BLH8	AT2G27990	1.36203	0.0140841	1.66273	0.00360143	Up
AT3G57020	AT3G57020	AT3G57020	1.95271	2.08e-05	1.66251	0.00040649	Up
AT1G61275	U12	AT1G61275	1.39008	0.0232156	1.65118	0.0389538	Up
AT1G06573	AT1G06573	AT1G06573	1.29685	0.00088564	1.64781	1.38e-06	Up
AT1G73390	AT1G73390	AT1G73390	1.01177	0.0258025	1.63802	0.000164071	Up
AT1G17745	PGDH	AT1G17745	1.60561	0.0201258	1.63314	0.0201771	Up
AT4G19860	AT4G19860	AT4G19860	1.1533	0.0219832	1.61963	0.00107701	Up
AT5G28300	AT5G28300	AT5G28300	1.98419	5.12e-07	1.61817	7.01e-05	Up
AT3G47360	HSD3	AT3G47360	1.92056	5.73e-06	1.61489	0.000199198	Up
AT3G03870	AT3G03870	AT3G03870	1.69274	0.0335677	1.61462	0.0486622	Up
AT2G35600	BRXL1	AT2G35600	2.21173	0.00891255	1.5971	0.015009	Up
AT5G47560	TDT	AT5G47560	1.53845	0.0242589	1.59571	0.0212081	Up
AT5G54760	AT5G54760	AT5G54760	1.07264	9.14e-06	1.58872	1.89e-11	Up
AT5G43400	AT5G43400	AT5G43400	2.71233	9.31e-07	1.57643	0.00400985	Up
AT2G24540	AFR	AT2G24540	1.22924	0.00136974	1.56934	2.06e-05	Up
AT1G79630	AT1G79630	AT1G79630	1.20217	0.00186819	1.56636	8.1e-06	Up
AT1G14730	AT1G14730	AT1G14730	2.46489	2.7e-05	1.5635	0.0121379	Up
AT1G74740	CPK30	AT1G74740	2.23949	1.74e-08	1.54729	0.000180576	Up
AT3G03550	AT3G03550	AT3G03550	1.51379	0.000105104	1.53725	2.6e-05	Up
AT3G44880	ACD1	AT3G44880	1.7761	2.61e-06	1.53447	6.97e-05	Up
AT5G39090	AT5G39090	AT5G39090	2.15285	0.00117938	1.53048	0.037674	Up
AT5G01600	FER1	AT5G01600	3.21009	4.12e-06	1.525	0.0450066	Up
AT1G44760	AT1G44760	AT1G44760	2.11676	0.00153627	1.51796	0.0308237	Up
AT3G48660	AT3G48660	AT3G48660	2.10859	0.00381885	1.51332	0.0328964	Up
AT1G06570	PDS1	AT1G06570	1.20748	0.0011367	1.49854	4.11e-05	Up
AT4G15550	IAGLU	AT4G15550	1.36022	0.0361436	1.48979	0.0210534	Up
AT5G25130	CYP71B12	AT5G25130	1.49	0.0204733	1.47615	0.0248315	Up
AT3G05880	RCI2A	AT3G05880	3.60583	4.24e-11	1.46202	0.0142716	Up
AT5G63320	NPX1	AT5G63320	2.53872	1.68e-07	1.45475	0.00462453	Up
AT4G31550	WRKY11	AT4G31550	1.91422	0.000623832	1.45184	0.0123583	Up
ATMG01390	ATMG01390	ATMG01390	2.97748	3.6e-07	1.44863	0.0225023	Up
AT3G59580	AT3G59580	AT3G59580	2.13514	0.00354421	1.44176	0.0266194	Up
AT5G20830	SUS1	AT5G20830	2.63119	9.27e-07	1.43455	0.0122418	Up
AT1G62045	AT1G62045	AT1G62045	2.49161	2.8e-06	1.42546	0.00878511	Up
AT3G04520	THA2	AT3G04520	1.38338	0.000418854	1.42488	0.000272613	Up
AT3G19170	PREP1	AT3G19170	1.56638	1.63e-13	1.41988	1.23e-11	Up
AT1G55280	AT1G55280	AT1G55280	1.43153	0.00426269	1.41761	0.00641211	Up
AT4G18020	APRR2	AT4G18020	1.72009	2.56e-09	1.41447	1.54e-06	Up
AT5G50100	AT5G50100	AT5G50100	1.00577	0.00690007	1.41354	9.41e-05	Up
AT5G01820	SR1 AT5G01820	AT5G01820	1.07167	0.0365785	1.40876	0.0053116	Up
AT5G17050	UGT78D2	AT5G17050	3.79448	4.32e-19	1.40071	0.00217129	Up
AT2G24545	AT2G24545	AT2G24545	2.26548	0.000210883	1.39708	0.0421333	Up
AT3G53280	CYP71B5	AT3G53280	1.30226	0.000124568	1.39168	2.24e-05	Up
AT3G14270	FAB1B	AT3G14270	1.51375	1.61e-05	1.38205	0.00010374	Up
AT4G20930	AT4G20930	AT4G20930	1.37495	0.0058302	1.38039	0.00644959	Up
AT1G47128	RD21A	AT1G47128	1.33384	0.00294924	1.37642	0.00241699	Up
AT1G21790	AT1G21790	AT1G21790	1.08633	0.00559007	1.36491	0.000479782	Up
AT5G40640	AT5G40640	AT5G40640	1.60784	0.000685869	1.34843	0.00427917	Up
AT1G24735	AT1G24735	AT1G24735	2.39138	1.73e-05	1.34646	0.00909559	Up
AT3G06740	GATA15	AT3G06740	1.19742	0.0270336	1.34575	0.0114877	Up
AT5G40340	AT5G40340	AT5G40340	2.00684	1.27e-08	1.34445	0.000243717	Up
AT3G30380	AT3G30380	AT3G30380	1.77976	4.24e-05	1.34035	0.00262268	Up
AT4G12000	AT4G12000	AT4G12000	1.17029	0.00699292	1.33292	0.00177238	Up
AT3G47347	AT3G47347	AT3G47347	1.7033	0.000823649	1.32939	0.00905894	Up
AT5G57910	AT5G57910	AT5G57910	2.05721	5.82e-05	1.31925	0.0153787	Up
AT2G03500	AT2G03500	AT2G03500	1.06048	0.0143124	1.31818	0.000535534	Up
AT1G58180	BCA6	AT1G58180	1.2468	0.0210389	1.31565	0.0172388	Up
AT2G07725	rpl5 AT2G07725	AT2G07725	2.49631	9.22e-06	1.3135	0.0384382	Up
AT2G32430	AT2G32430	AT2G32430	2.68627	1.01e-08	1.31218	0.00935245	Up
AT3G59410	GCN2	AT3G59410	1.22789	0.00130185	1.31061	0.00103144	Up
AT5G04130	GYRB2	AT5G04130	1.24086	0.00161048	1.31056	0.000506542	Up
AT3G15350	AT3G15350	AT3G15350	1.22875	0.00348867	1.30859	0.00177238	Up
AT3G16170	AAE13	AT3G16170	1.83363	1.26e-07	1.29538	0.000146331	Up
AT5G27150	NHX1	AT5G27150	1.04009	0.0019452	1.29518	9.57e-05	Up
AT2G18260	SYP112	AT2G18260	1.18463	0.00895596	1.29471	0.0127651	Up
AT4G31400	CTF7	AT4G31400	1.86137	0.000609172	1.28879	0.0301314	Up
AT1G28560	SRD2	AT1G28560	1.306	0.0186545	1.28694	0.0203287	Up
AT5G16630	RAD4	AT5G16630	1.24333	0.00139931	1.28687	0.000770211	Up
AT1G48310	CHR18	AT1G48310	1.42409	0.000362727	1.2835	0.00368515	Up
AT5G08170	EMB1873	AT5G08170	1.49022	1.91e-08	1.27855	6.86e-07	Up
AT2G31560	AT2G31560	AT2G31560	1.37404	9.27e-05	1.27456	0.000322516	Up
AT3G01490	AT3G01490	AT3G01490	1.13853	0.0215736	1.26642	0.00589389	Up
AT1G55190	PRA7	AT1G55190	1.3853	5.17e-12	1.26585	6.04e-11	Up
AT1G67880	AT1G67880	AT1G67880	1.13061	0.00571565	1.26464	0.00158457	Up
AT5G05380	PRA1.B3	AT5G05380	1.55714	4.65e-05	1.25718	0.000417612	Up
AT5G54840	SGP1	AT5G54840	2.86115	1.59e-07	1.25392	0.0377339	Up
AT1G71810	AT1G71810	AT1G71810	1.24635	3.72e-05	1.25212	2.87e-05	Up
AT1G54410	AT1G54410	AT1G54410	1.10429	0.00433609	1.25036	0.00125822	Up
AT2G41220	GLU2	AT2G41220	1.60913	3.45e-09	1.25022	1.67e-05	Up
AT1G21410	SKP2A	AT1G21410	1.32235	0.00335506	1.24685	0.0071107	Up
AT3G12090	TET6	AT3G12090	1.23676	0.000244606	1.24619	0.000199404	Up
AT5G53440	AT5G53440	AT5G53440	1.77144	4.59e-08	1.24113	0.000202369	Up
AT1G78070	AT1G78070	AT1G78070	1.61084	0.00106531	1.23764	0.0154521	Up
AT1G06210	AT1G06210	AT1G06210	1.08552	4.04e-07	1.23396	3.87e-09	Up
AT1G16960	AT1G16960	AT1G16960	1.02815	0.0193476	1.23364	0.00107592	Up
AT5G10730	AT5G10730	AT5G10730	1.31829	6.05e-06	1.22731	2.68e-05	Up
AT4G13010	AT4G13010	AT4G13010	1.08068	4.39e-05	1.22094	3.64e-06	Up
AT2G24040	AT2G24040	AT2G24040	1.05689	0.00249127	1.21907	0.00040649	Up
AT1G11410	AT1G11410	AT1G11410	1.02333	0.00745434	1.21406	0.000732666	Up
AT5G67180	TOE3	AT5G67180	1.35438	0.00622197	1.21009	0.00747275	Up
AT1G01780	PLIM2b	AT1G01780	1.41454	0.000525752	1.19636	0.00568544	Up
AT5G50240	PIMT2	AT5G50240	1.42785	0.0078095	1.19406	0.0300723	Up
AT4G12040	SAP7	AT4G12040	1.14887	6.36e-05	1.19092	3.48e-05	Up
AT1G22360	UGT85A2	AT1G22360	1.16173	0.0212401	1.18997	0.0266194	Up
AT1G76878	AT1G76878	AT1G76878	1.83605	0.0014538	1.18942	0.0303341	Up
AT1G69295	PDCB4	AT1G69295	1.68633	8.74e-07	1.18576	0.000843551	Up
AT1G58360	AAP1	AT1G58360	1.8139	2.66e-07	1.18462	0.00129929	Up
AT4G23330	AT4G23330	AT4G23330	1.0247	5.26e-06	1.18138	3.04e-08	Up
AT5G05560	EMB2771	AT5G05560	1.09246	0.036868	1.18132	0.0359922	Up
AT3G51990	AT3G51990	AT3G51990	1.73117	2.31e-07	1.17981	0.000455955	Up
AT3G12730	AT3G12730	AT3G12730	1.39593	0.000684739	1.17856	0.00379701	Up
AT5G41370	XPB1	AT5G41370	1.1848	0.000233236	1.17306	0.000242709	Up
AT1G55920	SERAT2;1	AT1G55920	1.5315	0.0021747	1.17042	0.0244879	Up
AT1G08570	ACHT4	AT1G08570	1.05502	0.0146343	1.16944	0.00692892	Up
AT4G30470	AT4G30470	AT4G30470	1.86549	0.000159822	1.16751	0.0250474	Up
AT3G26890	AT3G26890	AT3G26890	1.5716	3.59e-05	1.15919	0.00387162	Up
ATMG00580	nad4	ATMG00580	1.11235	0.00309184	1.15856	0.00220514	Up
AT2G01150	RHA2B	AT2G01150	1.36511	0.0169138	1.15813	0.0369065	Up
AT5G15240	AT5G15240	AT5G15240	1.33489	0.0190102	1.15692	0.0499083	Up
AT4G33090	APM1	AT4G33090	1.60226	2.43e-11	1.14636	3.8e-06	Up
AT3G03450	RGL2	AT3G03450	1.56073	0.00118825	1.14426	0.017043	Up
AT5G16450	AT5G16450	AT5G16450	1.31242	9.03e-05	1.14309	0.000888236	Up
AT1G54290	AT1G54290	AT1G54290	1.59909	4.58e-05	1.14186	0.00547306	Up
AT1G21920	AT1G21920	AT1G21920	1.09683	0.0371735	1.14054	0.0343361	Up
AT4G33950	OST1	AT4G33950	1.14975	0.000365445	1.13857	0.000270923	Up
AT5G57350	HA3	AT5G57350	1.16081	5.56e-05	1.13427	9.35e-05	Up
AT2G14110	AT2G14110	AT2G14110	1.08327	0.00180032	1.13426	0.00128958	Up
AT1G62430	CDS1	AT1G62430	1.15478	4.89e-07	1.13223	1.07e-06	Up
AT3G10370	SDP6	AT3G10370	1.40639	5.2e-09	1.13153	3.86e-06	Up
AT2G02080	IDD4	AT2G02080	1.15306	0.000398473	1.13122	0.00056655	Up
AT4G23920	UGE2	AT4G23920	1.14146	0.00562355	1.12834	0.00522229	Up
AT4G25280	AT4G25280	AT4G25280	1.00285	0.00114615	1.12304	0.000236818	Up
AT1G16300	GAPCP-2	AT1G16300	1.20344	0.0277658	1.12006	0.0360146	Up
AT4G24740	FC2 AT4G24740	AT4G24740	1.2864	3.18e-06	1.1195	6.39e-05	Up
AT5G41800	AT5G41800	AT5G41800	1.92588	1.71e-07	1.11307	0.00626901	Up
AT4G26630	AT4G26630	AT4G26630	1.48155	3.88e-08	1.10296	6.91e-05	Up
AT5G52510	SCL8	AT5G52510	1.55788	2.31e-09	1.09851	3.24e-05	Up
AT1G26580	AT1G26580	AT1G26580	1.35058	4.33e-05	1.09527	0.00150397	Up
AT1G51700	DOF1	AT1G51700	1.17901	0.0130702	1.09456	0.0238558	Up
AT1G02816	AT1G02816	AT1G02816	1.25461	0.00158968	1.09156	0.00718597	Up
AT3G10550	MTM1 AT3G10550	AT3G10550	1.74289	0.00023583	1.08449	0.0322001	Up
AT4G37320	CYP81D5	AT4G37320	3.45382	1.56e-14	1.08369	0.0262866	Up
AT1G55510	BCDH BETA1	AT1G55510	1.27821	0.0012357	1.08361	0.0115142	Up
AT3G54140	PTR1	AT3G54140	1.16209	0.000112112	1.08133	0.000387038	Up
AT5G62540	UBC3	AT5G62540	1.07362	2.15e-05	1.07243	2.16e-05	Up
AT5G57900	SKIP1	AT5G57900	1.7377	3.95e-05	1.06957	0.0171427	Up
AT5G14700	AT5G14700	AT5G14700	2.03968	2.2e-05	1.06647	0.0369448	Up
AT3G24740	AT3G24740	AT3G24740	1.35223	7.23e-06	1.0637	0.00071372	Up
AT5G43950	AT5G43950	AT5G43950	1.17453	0.0142731	1.05841	0.0370325	Up
AT1G65660	SMP1 AT1G65660	AT1G65660	1.40312	1.26e-05	1.05722	0.00142605	Up
AT3G54320	WRI1	AT3G54320	1.89216	0.000125392	1.05428	0.0470177	Up
AT1G68490	AT1G68490	AT1G68490	1.54936	2.16e-09	1.05184	8.38e-05	Up
AT5G54640	RAT5	AT5G54640	1.81468	8.39e-05	1.04549	0.0353432	Up
AT3G21430	ALY3	AT3G21430	1.78812	1.22e-05	1.044	0.0196166	Up
AT1G78710	TBL42	AT1G78710	1.60301	6.26e-06	1.04357	0.00337367	Up
AT3G51090	AT3G51090	AT3G51090	1.2776	0.00416735	1.0399	0.0305684	Up
AT3G03320	AT3G03320	AT3G03320	1.14157	0.0161948	1.03457	0.0330062	Up
AT5G65470	AT5G65470	AT5G65470	1.56471	4.66e-06	1.02512	0.00394826	Up
AT5G23680	AT5G23680	AT5G23680	1.28386	3.22e-05	1.0124	0.00106234	Up
AT5G17210	AT5G17210	AT5G17210	1.86008	4.86e-05	1.00984	0.0322838	Up
AT5G03030	AT5G03030	AT5G03030	1.18184	0.000546007	1.00663	0.00392449	Up
AT1G33730	CYP76C5	AT1G33730	-19.2342	2.04e-13	-17.6106	1.36e-10	Down
AT5G22570	WRKY38	AT5G22570	-4.62056	0.00063568	-9.89136	6.82e-08	Down
AT2G26400	ARD3	AT2G26400	-5.75271	0.00342347	-8.41291	0.000155938	Down
AT1G09080	BIP3	AT1G09080	-3.51635	0.00906529	-7.94726	3.45e-06	Down
AT2G15128	AT2G15128	AT2G15128	-3.60604	0.0025953	-7.25618	5.14e-06	Down
AT4G13890	EDA36	AT4G13890	-6.27205	0.00073361	-7.11059	0.000375544	Down
AT5G01900	WRKY62	AT5G01900	-4.28388	0.0113751	-6.98591	0.000888236	Down
AT1G51890	AT1G51890	AT1G51890	-2.81261	0.0384265	-6.85911	7.23e-05	Down
AT1G71390	RLP11	AT1G71390	-5.76801	0.0103607	-6.55503	0.00369822	Down
AT3G46280	AT3G46280	AT3G46280	-6.65555	0.00083206	-6.3357	0.00187042	Down
AT4G23310	CRK23	AT4G23310	-3.36087	0.00464037	-6.26942	0.000384609	Down
AT4G21830	MSRB7	AT4G21830	-3.24182	0.0448612	-6.17693	0.00316603	Down
AT2G14610	PR1	AT2G14610	-5.33686	9.45e-05	-6.17289	1.18e-05	Down
AT4G35180	LHT7	AT4G35180	-2.97764	0.0390264	-6.1083	0.00010173	Down
AT1G65484	AT1G65484	AT1G65484	-2.90484	0.0103411	-6.06242	8.81e-05	Down
AT5G27060	RLP53	AT5G27060	-2.49339	0.0316705	-6.03766	0.000127029	Down
AT1G75040	PR5	AT1G75040	-2.53381	0.0308773	-6.00445	1.01e-07	Down
AT4G09770	AT4G09770	AT4G09770	-2.66875	0.0162893	-5.92277	0.000246978	Down
AT5G64000	SAL2	AT5G64000	-2.44519	0.0407817	-5.85443	3.05e-06	Down
AT5G10760	AT5G10760	AT5G10760	-2.2982	0.0334563	-5.76228	1.25e-08	Down
AT3G60540	AT3G60540	AT3G60540	-2.16195	0.026576	-5.50888	1.56e-08	Down
AT1G03850	GRXS13	AT1G03850	-3.65488	0.00314437	-5.2108	0.000255182	Down
AT3G09940	MDHAR	AT3G09940	-3.37281	0.0223505	-5.16387	0.00109169	Down
AT1G21310	EXT3	AT1G21310	-5.39864	5.68e-08	-5.14039	4.16e-07	Down
AT5G44574	AT5G44574	AT5G44574	-2.63457	0.00604737	-5.03168	4.02e-05	Down
AT4G18250	AT4G18250	AT4G18250	-2.96894	0.0233872	-4.92209	0.00144443	Down
AT3G28890	RLP43	AT3G28890	-3.10819	0.018642	-4.92133	0.00111536	Down
AT4G29610	AT4G29610	AT4G29610	-6.54926	3.72e-05	-4.74915	0.000271607	Down
AT4G25110	MC2	AT4G25110	-3.66758	0.0068086	-4.72896	0.00529342	Down
AT1G44130	AT1G44130	AT1G44130	-3.59279	0.0185872	-4.69656	0.0241497	Down
AT5G63225	AT5G63225	AT5G63225	-3.72103	0.00639484	-4.66592	0.0194092	Down
AT5G39180	AT5G39180	AT5G39180	-4.45121	0.0228056	-4.60451	0.021392	Down
AT3G24000	AT3G24000	AT3G24000	-2.47521	0.00564466	-4.58986	2.55e-06	Down
AT3G61198	AT3G61198	AT3G61198	-2.30492	0.00206487	-4.43568	2.89e-07	Down
AT2G21840	AT2G21840	AT2G21840	-4.03066	0.0110172	-4.29707	0.00755089	Down
AT2G07140	AT2G07140	AT2G07140	-4.4848	0.0324184	-4.2957	0.0455625	Down
AT1G76930	EXT4	AT1G76930	-5.02601	8.06e-06	-4.28808	0.000391341	Down
AT1G30720	AT1G30720	AT1G30720	-5.09426	0.00185043	-4.28606	0.0257119	Down
AT1G33840	AT1G33840	AT1G33840	-7.17056	0.000187309	-4.18521	0.0491872	Down
AT3G52430	PAD4	AT3G52430	-1.54953	0.0400269	-4.10252	8.86e-09	Down
AT5G44575	AT5G44575	AT5G44575	-4.34894	9.6e-07	-3.92562	5.75e-06	Down
AT5G51530	AT5G51530	AT5G51530	-4.40212	0.0052407	-3.9179	0.00146241	Down
AT5G59580	UGT76E1	AT5G59580	-3.69692	0.0366203	-3.87956	0.032091	Down
AT5G53110	AT5G53110	AT5G53110	-2.28023	0.0374083	-3.80564	0.000804331	Down
AT1G47210	CYCA3;2	AT1G47210	-3.22009	1.41e-06	-3.37338	1.55e-07	Down
AT3G07520	GLR1.4	AT3G07520	-1.19303	0.013794	-3.27744	7.89e-12	Down
AT5G43910	AT5G43910	AT5G43910	-1.70529	0.0294505	-3.2507	2.34e-05	Down
AT1G01448	AT1G01448	AT1G01448	-1.20594	0.0338896	-3.23325	7.97e-11	Down
AT5G10380	RING1	AT5G10380	-2.25571	0.0031039	-3.18737	1.98e-05	Down
AT1G18773	AT1G18773	AT1G18773	-2.33838	4.6e-08	-3.17328	9.71e-16	Down
AT1G54010	AT1G54010	AT1G54010	-3.70523	0.000229813	-3.15322	0.0022552	Down
AT1G02050	LAP6	AT1G02050	-1.75533	0.00759906	-3.09709	1.88e-07	Down
AT2G42360	ATL41	AT2G42360	-3.04166	0.000577227	-3.08577	0.00169191	Down
AT5G05205	AT5G05205	AT5G05205	-5.07798	0.00112028	-3.0616	0.00843322	Down
AT3G45860	CRK4	AT3G45860	-3.72685	8.74e-05	-3.04198	0.00177004	Down
AT5G45840	AT5G45840	AT5G45840	-3.82642	0.00145043	-3.02025	0.00101621	Down
AT4G38210	EXPA20	AT4G38210	-1.56075	0.0255116	-2.99469	3.01e-06	Down
AT1G74440	AT1G74440	AT1G74440	-1.38479	0.023627	-2.97289	2.5e-07	Down
AT3G47340	ASN1	AT3G47340	-3.74865	0.000512563	-2.9044	0.0112736	Down
AT1G05570	CALS1	AT1G05570	-1.43845	0.0133312	-2.89335	2.16e-07	Down
AT2G22330	CYP79B3	AT2G22330	-1.9725	0.00336185	-2.89039	9.15e-06	Down
AT1G67328	AT1G67328	AT1G67328	-1.75493	0.0336609	-2.86203	0.00103984	Down
AT2G26390	AT2G26390	AT2G26390	-3.35359	0.00459875	-2.84457	0.0314072	Down
AT1G68110	AT1G68110	AT1G68110	-2.31051	0.00669114	-2.7056	4.84e-05	Down
AT2G39570	ACR9	AT2G39570	-1.30099	0.00817196	-2.67258	6.51e-09	Down
AT4G29520	AT4G29520	AT4G29520	-2.18753	0.00128416	-2.64182	8.99e-05	Down
AT1G14170	AT1G14170	AT1G14170	-1.83191	0.000106332	-2.5868	1.64e-08	Down
AT1G20350	TIM17-1	AT1G20350	-1.9706	0.0191092	-2.58174	0.00279594	Down
AT5G26270	AT5G26270	AT5G26270	-3.19555	0.0167524	-2.56629	0.0352909	Down
AT2G18390	TTN5	AT2G18390	-1.35499	0.0050231	-2.52772	6.99e-08	Down
AT3G45890	RUS1	AT3G45890	-2.16933	7.67e-05	-2.52768	2.49e-07	Down
AT3G12820	MYB10	AT3G12820	-2.50075	0.00427541	-2.51528	0.00314027	Down
AT2G02810	UTR1	AT2G02810	-1.74056	0.0426829	-2.50204	0.00307754	Down
AT2G32550	AT2G32550	AT2G32550	-1.737	0.046785	-2.4911	0.0126743	Down
AT2G31810	AT2G31810	AT2G31810	-1.46601	6.83e-10	-2.459	1.35e-28	Down
AT3G07580	AT3G07580	AT3G07580	-1.63791	0.0150114	-2.44703	0.000189715	Down
AT1G14140	UCP3	AT1G14140	-1.25759	4.12e-05	-2.41426	1.59e-17	Down
AT4G28510	PHB1	AT4G28510	-1.03857	0.0112592	-2.39851	2.73e-10	Down
AT5G44566	AT5G44566	AT5G44566	-1.48083	0.0130704	-2.37144	7.8e-06	Down
AT3G54880	AT3G54880	AT3G54880	-2.33169	1.04e-05	-2.36787	1.92e-06	Down
AT4G29560	AT4G29560	AT4G29560	-2.02275	0.0217743	-2.32713	0.00368515	Down
AT2G18280	TLP2	AT2G18280	-1.17827	0.00154481	-2.32645	6.04e-11	Down
AT5G54710	AT5G54710	AT5G54710	-2.12409	0.0206111	-2.29532	0.0121944	Down
AT3G08943	AT3G08943	AT3G08943	-2.34797	3.15e-07	-2.26913	8.13e-07	Down
AT2G20500	AT2G20500	AT2G20500	-2.07017	0.0451804	-2.2686	0.0110488	Down
AT1G65845	AT1G65845	AT1G65845	-2.38418	0.00207883	-2.267	0.00412105	Down
AT1G36675	AT1G36675	AT1G36675	-4.01259	0.000704218	-2.25452	0.0424608	Down
AT3G53240	RLP45	AT3G53240	-2.68634	5.5e-06	-2.23252	1.54e-05	Down
AT1G66100	AT1G66100	AT1G66100	-4.45701	1.57e-05	-2.2253	0.0451366	Down
AT4G16370	OPT3	AT4G16370	-3.65717	1.89e-14	-2.22101	5.23e-06	Down
AT1G59920	AT1G59920	AT1G59920	-4.66036	2.63e-07	-2.19207	0.0104164	Down
AT1G14360	UTR3	AT1G14360	-1.72424	0.0166185	-2.14048	0.00269333	Down
AT4G05330	AGD13	AT4G05330	-2.37788	1.09e-05	-2.13833	0.000172334	Down
AT1G12910	ATAN11	AT1G12910	-1.02187	0.000310974	-2.13812	1.43e-15	Down
AT1G09210	CRT1b	AT1G09210	-1.64727	0.00501581	-2.13035	0.000231985	Down
AT1G10120	AT1G10120	AT1G10120	-2.01817	2.15e-07	-2.12711	2.33e-09	Down
AT1G55880	AT1G55880	AT1G55880	-1.09993	0.00239494	-2.1266	5.14e-11	Down
AT1G17120	CAT8	AT1G17120	-1.73655	1.31e-07	-2.12398	1.15e-12	Down
AT3G57157	AT3G57157	AT3G57157	-4.5894	0.00047304	-2.12107	0.0379301	Down
AT3G53760	GCP4	AT3G53760	-2.21616	0.00909549	-2.1197	0.00597084	Down
AT5G26880	AGL26	AT5G26880	-1.49795	0.000547026	-2.11396	5.87e-07	Down
AT1G06993	AT1G06993	AT1G06993	-3.36328	0.000193472	-2.10915	0.0166551	Down
AT1G62590	AT1G62590	AT1G62590	-1.98731	0.00354956	-2.06484	0.000280847	Down
AT1G75130	CYP721A1	AT1G75130	-1.04757	0.000310974	-2.06059	1.74e-14	Down
AT1G48315	AT1G48315	AT1G48315	-2.79553	0.00306147	-2.03403	0.0177646	Down
AT1G61170	AT1G61170	AT1G61170	-2.55364	7.42e-06	-2.03213	5.43e-05	Down
AT5G58600	PMR5	AT5G58600	-1.70232	0.027666	-2.02397	0.000399519	Down
AT1G05710	AT1G05710	AT1G05710	-1.19433	0.0233329	-2.01332	0.000154946	Down
AT5G48540	AT5G48540	AT5G48540	-1.78962	0.0215912	-2.00747	0.0100905	Down
AT5G58480	AT5G58480	AT5G58480	-3.34935	3.16e-07	-2.00433	0.00019139	Down
AT1G77138	AT1G77138	AT1G77138	-1.99216	0.0249597	-2.00265	0.00704646	Down
AT1G18415	AT1G18415	AT1G18415	-1.711	0.00854901	-2.00025	0.000982215	Down
AT5G10570	AT5G10570	AT5G10570	-3.45737	0.00707422	-1.98696	0.048523	Down
AT2G07180	AT2G07180	AT2G07180	-1.55295	1.8e-05	-1.98495	1.28e-08	Down
AT3G62600	ATERDJ3B	AT3G62600	-1.35831	0.0450185	-1.97665	0.00277324	Down
AT4G13577	AT4G13577	AT4G13577	-3.52126	2.17e-05	-1.93656	0.011445	Down
AT2G28940	AT2G28940	AT2G28940	-1.22017	0.038779	-1.93312	0.000546594	Down
AT5G39000	AT5G39000	AT5G39000	-2.13948	0.0381634	-1.92893	0.0336228	Down
AT5G02150	Fes1C	AT5G02150	-1.54643	1.12e-07	-1.9152	7.89e-12	Down
AT1G13640	AT1G13640	AT1G13640	-1.093	0.0275994	-1.90747	6.13e-05	Down
AT1G59930	AT1G59930	AT1G59930	-4.74718	2.63e-09	-1.90591	0.0193691	Down
AT5G02650	AT5G02650	AT5G02650	-1.18971	0.000448387	-1.90524	3.6e-09	Down
AT1G14260	AT1G14260	AT1G14260	-2.53863	0.00856801	-1.88587	0.0462319	Down
AT2G20810	GAUT10	AT2G20810	-1.3906	0.000273993	-1.85628	4.77e-09	Down
AT3G45443	AT3G45443	AT3G45443	-1.40815	0.00466212	-1.82572	6.52e-05	Down
AT3G20015	AT3G20015	AT3G20015	-3.61536	0.00649633	-1.81835	0.00529653	Down
AT3G25210	AT3G25210	AT3G25210	-1.11322	0.00780399	-1.81552	1.41e-06	Down
AT1G10600	AMSH2	AT1G10600	-1.14534	0.00688087	-1.8117	8.23e-06	Down
AT1G54360	TAF6B	AT1G54360	-1.0512	8.72e-07	-1.80218	2.86e-20	Down
AT3G60580	AT3G60580	AT3G60580	-1.78885	0.0167065	-1.80057	0.00386339	Down
AT2G44640	AT2G44640	AT2G44640	-3.07877	4.13e-06	-1.78246	0.00991238	Down
AT1G74170	RLP13	AT1G74170	-1.43522	0.00357557	-1.77498	0.000202658	Down
AT5G06240	emb2735	AT5G06240	-1.0452	0.00407287	-1.75716	2.41e-07	Down
AT3G14600	AT3G14600	AT3G14600	-1.40197	0.00181681	-1.74437	8.38e-05	Down
AT1G63150	AT1G63150	AT1G63150	-1.42381	0.0140057	-1.73605	0.000908079	Down
AT1G13980	GN	AT1G13980	-1.2091	1.58e-05	-1.73518	4.51e-11	Down
AT1G17500	AT1G17500	AT1G17500	-1.44487	0.00481473	-1.72772	0.000290139	Down
AT5G17880	CSA1	AT5G17880	-1.47694	6.05e-05	-1.70581	1.12e-06	Down
AT5G09315	AT5G09315	AT5G09315	-1.24016	0.00496065	-1.70091	4.16e-05	Down
AT1G23170	AT1G23170	AT1G23170	-2.84746	0.000215784	-1.65432	0.013365	Down
AT2G37170	PIP2B	AT2G37170	-1.85746	0.000694384	-1.64161	0.00339198	Down
AT2G37710	RLK AT2G37710	AT2G37710	-1.31213	0.0397666	-1.64019	0.00940045	Down
AT4G02130	GATL6	AT4G02130	-2.26521	4.83e-08	-1.63972	8e-05	Down
AT1G14180	AT1G14180	AT1G14180	-3.40822	0.00392129	-1.62353	0.031622	Down
AT4G17486	AT4G17486	AT4G17486	-1.47347	1.39e-06	-1.60959	6.97e-08	Down
AT1G02280	TOC33	AT1G02280	-1.36574	0.0186167	-1.60684	0.00520594	Down
AT5G67260	CYCD3;2	AT5G67260	-1.96726	0.000884583	-1.59814	0.00745047	Down
AT2G29050	RBL1	AT2G29050	-2.98446	8.44e-05	-1.59534	0.0176539	Down
AT3G02700	AT3G02700	AT3G02700	-1.86957	3.18e-08	-1.57383	1.07e-06	Down
AT2G27590	AT2G27590	AT2G27590	-1.47256	0.000211943	-1.56891	5.24e-06	Down
AT3G48870	HSP93-III	AT3G48870	-2.1208	0.000580692	-1.55895	0.0150795	Down
AT5G27830	AT5G27830	AT5G27830	-1.1692	0.0104826	-1.55651	0.000412962	Down
AT1G74390	AT1G74390	AT1G74390	-2.51899	0.00619863	-1.54416	0.0121231	Down
AT5G20950	AT5G20950	AT5G20950	-1.6802	2.89e-06	-1.53704	1.42e-05	Down
AT4G34670	AT4G34670	AT4G34670	-1.06787	0.0114254	-1.53663	0.000187787	Down
AT4G30500	AT4G30500	AT4G30500	-1.66054	0.00372715	-1.53623	0.00640543	Down
AT1G30230	eEF-1Bb1	AT1G30230	-1.44318	8e-05	-1.53553	2.85e-05	Down
AT2G44660	AT2G44660	AT2G44660	-1.41845	3.46e-05	-1.53397	5.51e-08	Down
AT5G59020	AT5G59020	AT5G59020	-2.94089	0.00342626	-1.52647	0.0325245	Down
AT1G06560	AT1G06560	AT1G06560	-1.17248	0.00860018	-1.52461	5.93e-05	Down
AT5G58930	AT5G58930	AT5G58930	-2.20523	3.95e-08	-1.52005	4.35e-05	Down
AT5G02710	AT5G02710	AT5G02710	-1.16044	0.000572503	-1.49013	3.44e-06	Down
AT3G54260	TBL36	AT3G54260	-2.6909	0.000452272	-1.47844	0.00528616	Down
AT5G06770	AT5G06770	AT5G06770	-1.4754	1.57e-05	-1.47472	5.47e-06	Down
AT5G60450	ARF4	AT5G60450	-1.04159	0.0362152	-1.47076	0.00244274	Down
AT5G27450	MK	AT5G27450	-1.4515	0.0210514	-1.46139	0.0170572	Down
AT2G32380	AT2G32380	AT2G32380	-1.91175	0.00015988	-1.45948	0.00284951	Down
AT3G29810	COBL2	AT3G29810	-1.39707	0.0271862	-1.44678	0.0231246	Down
AT5G13100	AT5G13100	AT5G13100	-3.3467	5.98e-11	-1.44373	0.00540571	Down
AT5G17710	EMB1241	AT5G17710	-1.19468	0.00333624	-1.43924	0.000357231	Down
AT3G45310	AT3G45310	AT3G45310	-1.18405	0.0161858	-1.43824	0.00296814	Down
AT1G57720	AT1G57720	AT1G57720	-1.18272	1.15e-05	-1.43767	6.34e-08	Down
AT3G62980	TIR1	AT3G62980	-1.57985	4.91e-06	-1.42182	4.09e-05	Down
AT5G36930	AT5G36930	AT5G36930	-1.76665	0.00023589	-1.40367	0.00278905	Down
AT3G05650	RLP32	AT3G05650	-1.7107	0.00472456	-1.39794	0.023918	Down
AT1G49600	RBP47A	AT1G49600	-1.27603	0.00459796	-1.39242	0.00179431	Down
AT3G49500	RDR6	AT3G49500	-1.68933	0.000317512	-1.39018	0.00168256	Down
AT1G15180	AT1G15180	AT1G15180	-2.63112	2.42e-06	-1.38959	0.0131282	Down
AT1G10950	TMN1	AT1G10950	-1.04279	3.53e-06	-1.38535	2.01e-10	Down
AT1G58602	AT1G58602	AT1G58602	-1.14243	0.0092045	-1.37482	0.00160269	Down
AT1G08350	AT1G08350	AT1G08350	-1.33548	0.000148855	-1.37335	7.63e-06	Down
AT1G25230	AT1G25230	AT1G25230	-2.29855	2.83e-05	-1.3697	0.0145595	Down
AT1G63110	AT1G63110	AT1G63110	-1.47676	3.52e-05	-1.36402	7.48e-05	Down
AT4G25900	AT4G25900	AT4G25900	-1.91255	7.62e-05	-1.35938	0.00669932	Down
AT1G15930	AT1G15930	AT1G15930	-1.02207	0.0219918	-1.34757	0.00216038	Down
AT1G05720	AT1G05720	AT1G05720	-1.01118	0.000441606	-1.34461	1.38e-06	Down
AT4G38280	AT4G38280	AT4G38280	-1.15091	0.000832053	-1.33384	1.04e-05	Down
AT3G12080	emb2738	AT3G12080	-1.94658	1.2e-06	-1.33006	0.0009792	Down
AT5G48440	AT5G48440	AT5G48440	-1.15725	0.000289098	-1.32811	1.58e-05	Down
AT3G23780	NRPD2A	AT3G23780	-1.4634	1.06e-05	-1.3268	2.19e-05	Down
AT2G25300	AT2G25300	AT2G25300	-1.26941	0.00223604	-1.31705	9.98e-05	Down
AT1G08360	AT1G08360	AT1G08360	-1.38366	0.000152896	-1.3082	0.000404039	Down
AT4G21926	AT4G21926	AT4G21926	-2.04262	0.00120701	-1.30302	0.0386076	Down
AT4G38160	pde191	AT4G38160	-2.57715	6.22e-06	-1.30139	0.0257398	Down
AT5G55940	emb2731	AT5G55940	-1.08974	3.73e-05	-1.30138	2.96e-07	Down
AT1G53350	AT1G53350	AT1G53350	-1.70563	0.000147235	-1.30028	0.0018487	Down
AT5G27430	AT5G27430	AT5G27430	-1.44435	6.09e-09	-1.29598	6.79e-08	Down
AT1G74210	GDPD5	AT1G74210	-1.23121	0.0078005	-1.29328	0.0052681	Down
AT1G54310	AT1G54310	AT1G54310	-1.6646	0.00226929	-1.28845	0.00984045	Down
AT4G01570	AT4G01570	AT4G01570	-1.21071	0.00222126	-1.27381	5.84e-05	Down
AT1G11290	CRR22	AT1G11290	-3.3548	0.000167535	-1.27024	0.0356731	Down
AT2G23350	PAB4	AT2G23350	-1.07452	0.0148856	-1.25115	0.0041312	Down
AT2G18960	HA1	AT2G18960	-1.05394	7.93e-05	-1.25028	2.53e-06	Down
AT1G10470	ARR4	AT1G10470	-4.01466	8.87e-17	-1.24543	0.01567	Down
AT5G47435	AT5G47435	AT5G47435	-1.64501	7.98e-06	-1.24204	0.000987228	Down
AT5G40850	UPM1	AT5G40850	-1.63492	0.000420373	-1.23167	0.00758511	Down
AT1G05350	AT1G05350	AT1G05350	-1.70127	1.09e-06	-1.22487	0.00025711	Down
AT5G06050	AT5G06050	AT5G06050	-1.66894	0.00309184	-1.22314	0.0150418	Down
AT1G49760	PAB8	AT1G49760	-1.02598	0.0253905	-1.21445	0.00709709	Down
AT1G73230	AT1G73230	AT1G73230	-1.29069	0.000194225	-1.21337	0.000534011	Down
AT2G43900	5PTase12	AT2G43900	-1.77609	0.000506008	-1.21162	0.0257857	Down
AT5G56660	ILL2	AT5G56660	-1.00707	0.00326427	-1.20649	0.000162044	Down
AT5G27400	AT5G27400	AT5G27400	-1.19548	0.0228625	-1.20262	0.00350185	Down
AT1G55130	TMN6	AT1G55130	-1.85303	5.83e-05	-1.19554	0.00565317	Down
AT1G49240	ACT8	AT1G49240	-1.00309	2e-06	-1.19544	9.82e-09	Down
AT5G01240	LAX1	AT5G01240	-3.32539	1.21e-08	-1.19495	0.038225	Down
AT4G31360	AT4G31360	AT4G31360	-1.42264	0.00705011	-1.19244	0.0188731	Down
AT5G42240	scpl42	AT5G42240	-2.04137	4.47e-08	-1.18995	0.00118726	Down
AT5G27380	GSH2	AT5G27380	-1.06175	0.000107668	-1.18524	1.25e-05	Down
AT4G31270	AT4G31270	AT4G31270	-1.70365	0.000308071	-1.17868	0.0103172	Down
AT1G49480	RTV1	AT1G49480	-1.1289	3.71e-06	-1.17743	7.19e-07	Down
AT5G01020	AT5G01020	AT5G01020	-1.55492	1.19e-05	-1.17647	0.00102871	Down
AT3G06868	AT3G06868	AT3G06868	-2.18093	0.000223963	-1.16334	0.0336228	Down
AT1G07650	AT1G07650	AT1G07650	-1.08354	0.0117584	-1.15852	0.00552019	Down
AT1G55000	AT1G55000	AT1G55000	-1.12697	0.000262025	-1.15225	0.000154411	Down
AT2G04530	CPZ	AT2G04530	-1.23068	0.0114247	-1.14765	0.013739	Down
AT1G53390	ABCG24	AT1G53390	-1.04703	0.00307683	-1.13844	0.000194455	Down
AT4G05040	AT4G05040	AT4G05040	-1.07723	0.0168909	-1.13354	0.00939087	Down
AT5G55530	AT5G55530	AT5G55530	-1.07628	0.000309434	-1.12764	0.000234857	Down
AT2G11225	AT2G11225	AT2G11225	-1.69653	0.00354879	-1.12679	0.038479	Down
AT5G44580	AT5G44580	AT5G44580	-2.24747	8.27e-06	-1.12544	0.0395401	Down
AT2G33860	ETT	AT2G33860	-1.86036	0.000310974	-1.11895	0.0321374	Down
AT1G06390	GSK1	AT1G06390	-1.37673	4.36e-09	-1.11329	4.96e-07	Down
AT1G67330	AT1G67330	AT1G67330	-1.27158	0.0153263	-1.11207	0.0359796	Down
AT4G09040	AT4G09040	AT4G09040	-1.08047	0.000989121	-1.10785	0.00053398	Down
AT2G25430	AT2G25430	AT2G25430	-1.17731	4.85e-05	-1.107	0.00013213	Down
AT5G22340	AT5G22340	AT5G22340	-2.16585	2.5e-05	-1.09902	0.042876	Down
AT3G01690	AT3G01690	AT3G01690	-2.79809	2.73e-10	-1.0935	0.019846	Down
AT4G02820	AT4G02820	AT4G02820	-1.23142	0.0237893	-1.0917	0.0355413	Down
AT5G11810	AT5G11810	AT5G11810	-1.07087	0.00150857	-1.08729	0.000886802	Down
AT1G05590	HEXO2	AT1G05590	-2.48921	6.21e-12	-1.07926	0.000424324	Down
AT2G33530	scpl46	AT2G33530	-1.51982	0.00113574	-1.07378	0.0259809	Down
AT3G27090	AT3G27090	AT3G27090	-1.09331	6.34e-05	-1.07248	9.18e-05	Down
AT4G04435	AT4G04435	AT4G04435	-1.7064	4.38e-05	-1.07213	0.00472737	Down
AT1G19710	AT1G19710	AT1G19710	-1.23718	0.000227111	-1.07207	0.000303892	Down
AT5G24520	TTG1	AT5G24520	-1.30541	0.000270294	-1.06412	0.00303978	Down
AT3G04860	AT3G04860	AT3G04860	-1.56553	0.00240752	-1.06379	0.0275741	Down
AT1G29900	CARB	AT1G29900	-1.09467	0.0134855	-1.0581	0.0174977	Down
AT5G11450	PPD5	AT5G11450	-1.90154	6.53e-06	-1.05556	0.0178262	Down
AT3G17650	YSL5	AT3G17650	-1.63809	6.31e-10	-1.05172	4.74e-05	Down
AT4G37250	AT4G37250	AT4G37250	-2.17892	0.000101296	-1.04945	0.0220608	Down
AT5G66450	LPPepsilon2	AT5G66450	-1.06283	0.000137601	-1.04938	3.24e-05	Down
AT1G52600	AT1G52600	AT1G52600	-1.03721	0.00111987	-1.04551	0.00108814	Down
AT3G52640	AT3G52640	AT3G52640	-1.12166	8.58e-08	-1.04109	4.71e-09	Down
AT5G44565	AT5G44565	AT5G44565	-4.7835	1.38e-12	-1.04006	0.0447682	Down
AT2G18910	AT2G18910	AT2G18910	-1.23618	0.000685671	-1.03691	0.00392925	Down
AT4G17080	AT4G17080	AT4G17080	-1.30251	0.00164951	-1.03616	0.0128247	Down
AT4G01040	AT4G01040	AT4G01040	-1.08118	0.00197531	-1.03546	0.00105839	Down
AT3G48820	AT3G48820	AT3G48820	-1.29047	5.18e-06	-1.03363	2.74e-05	Down
AT1G09060	AT1G09060	AT1G09060	-1.73609	1.86e-08	-1.03336	0.000376331	Down
AT1G26940	AT1G26940	AT1G26940	-1.04741	0.00778339	-1.02791	0.00482312	Down
AT2G20120	COV1	AT2G20120	-1.11428	1.65e-06	-1.0215	2.93e-06	Down
AT1G76050	AT1G76050	AT1G76050	-1.23577	1.05e-05	-1.01913	1.41e-05	Down
AT1G09010	AT1G09010	AT1G09010	-1.13867	0.00541814	-1.01887	0.0149288	Down
AT2G48070	RPH1	AT2G48070	-2.03846	7.6e-11	-1.0112	0.00140938	Down
AT5G62890	AT5G62890	AT5G62890	-2.01094	3.74e-07	-1.00992	0.0129211	Down
AT1G17455	ELF4-L4	AT1G17455	-1.15379	0.00540937	-1.00709	0.0190915	Down
AT4G31250	AT4G31250	AT4G31250	-3.02286	0.000167733	-1.0061	0.039222	Down
AT2G24290	AT2G24290	AT2G24290	-1.50888	9.29e-05	-1.00369	0.00982805	Down
AT1G51160	AT1G51160	AT1G51160	-1.11736	2.62e-07	-1.00053	2.69e-06	Down

## Sheet: atg5-1NES_vs_Col0NES
User_ID	symbol	ensembl_ID	atg5TCV-Col0TCV_log2FC	atg5TCV-Col0TCV_adjPval	atg5NES-Col0NES_log2FC	atg5NES-Col0NES_adjPval	Direction
AT1G73260	KTI1	AT1G73260	3.76843	0.0157143	9.42027	2.56e-08	Up
AT2G35300	LEA18	AT2G35300	7.55493	3.51e-05	8.59533	0.000130708	Up
AT1G80160	GLYI7	AT1G80160	4.17148	0.00111475	8.52642	3.33e-08	Up
AT5G44610	MAP18	AT5G44610	4.93192	0.011178	8.04943	0.00190022	Up
AT1G62760	AT1G62760	AT1G62760	5.12151	5.44e-05	8.03504	9.61e-06	Up
AT3G61930	AT3G61930	AT3G61930	4.30904	0.0180756	7.42829	0.000671884	Up
AT4G32810	CCD8	AT4G32810	5.50712	0.0017643	7.30712	0.0030718	Up
AT1G52690	LEA7	AT1G52690	6.42419	0.000589128	7.02352	0.00105099	Up
AT3G48580	XTH11	AT3G48580	4.16972	0.0305684	6.65326	0.0112773	Up
AT3G19615	AT3G19615	AT3G19615	3.92499	0.0133277	6.60111	0.00243062	Up
AT3G50980	XERO1	AT3G50980	7.64038	0.00394311	6.52194	0.0366008	Up
AT4G33467	AT4G33467	AT4G33467	5.09527	0.00243562	6.48797	0.00510618	Up
AT5G39520	AT5G39520	AT5G39520	4.39886	0.000188448	6.42227	2.38e-07	Up
AT1G22990	HIPP22	AT1G22990	5.1364	0.00325213	6.30666	0.0129872	Up
AT1G61820	BGLU46	AT1G61820	3.72962	0.00642225	6.20215	0.000114196	Up
AT2G47200	AT2G47200	AT2G47200	3.77777	0.00418898	6.04692	0.00165514	Up
AT2G47270	UPB1	AT2G47270	3.54922	0.00401489	5.84513	1.72e-05	Up
AT2G37750	AT2G37750	AT2G37750	5.06967	1.19e-07	5.75049	1.46e-08	Up
AT4G39675	AT4G39675	AT4G39675	2.5467	0.0420536	5.67753	0.000163062	Up
AT4G15610	AT4G15610	AT4G15610	2.48727	0.0324594	5.66857	1.02e-06	Up
AT2G25625	AT2G25625	AT2G25625	4.85825	0.000711717	5.60966	0.000472063	Up
AT3G15500	NAC3 AT3G15500	AT3G15500	3.25894	0.0336722	5.45905	0.00131735	Up
AT3G22565	AT3G22565	AT3G22565	6.21179	0.00332376	5.30586	0.036232	Up
AT5G10625	AT5G10625	AT5G10625	2.19725	0.0313375	5.28525	6.5e-05	Up
AT1G48000	MYB112	AT1G48000	4.1341	0.00063096	5.26556	0.000139299	Up
AT4G18980	AtS40-3	AT4G18980	2.91802	0.0108208	5.26416	0.000462484	Up
AT3G10320	AT3G10320	AT3G10320	3.01229	0.020386	5.16625	0.000228475	Up
AT2G27389	AT2G27389	AT2G27389	3.61389	0.0175525	5.09949	0.00472261	Up
AT5G50360	AT5G50360	AT5G50360	4.65608	0.00853216	5.03849	0.0232438	Up
AT3G55910	AT3G55910	AT3G55910	2.99003	0.000471753	5.01904	0.00724755	Up
AT4G35770	SEN1 AT4G35770	AT4G35770	2.33774	0.0238694	5.00118	1.57e-06	Up
AT4G37990	ELI3-2	AT4G37990	3.95453	0.0128994	4.92454	0.0109905	Up
AT1G05340	AT1G05340	AT1G05340	4.85355	7.8e-06	4.92162	3.05e-05	Up
AT2G45210	SAUR36	AT2G45210	3.24851	0.000478642	4.84286	1.37e-06	Up
AT1G66390	MYB90	AT1G66390	2.97976	0.032477	4.82599	0.00162374	Up
AT3G55890	AT3G55890	AT3G55890	3.525	0.000761025	4.80517	0.000198326	Up
AT2G45570	CYP76C2	AT2G45570	3.37217	0.0498977	4.80353	0.0113736	Up
AT4G33150	AT4G33150	AT4G33150	4.09718	5.37e-05	4.80332	1.34e-05	Up
AT5G00765	AT5G00765	AT5G00765	3.15441	0.000802643	4.79158	0.00899644	Up
AT3G22560	AT3G22560	AT3G22560	4.46547	0.000194155	4.78537	0.001269	Up
AT5G39610	NAC6	AT5G39610	2.93586	0.0152775	4.71315	0.000303731	Up
AT3G02480	AT3G02480	AT3G02480	4.41144	0.000163073	4.63401	0.00162374	Up
AT2G41230	ORS1	AT2G41230	3.76756	0.0188173	4.59056	0.00917835	Up
AT3G48020	AT3G48020	AT3G48020	5.0904	5.16e-08	4.554	1e-05	Up
AT2G31945	AT2G31945	AT2G31945	3.87235	0.000727249	4.53252	0.000663347	Up
AT4G11910	AT4G11910	AT4G11910	4.28249	8.87e-06	4.51427	2.58e-05	Up
AT4G23680	AT4G23680	AT4G23680	2.3686	0.031048	4.49743	0.000173078	Up
AT5G52300	LTI65	AT5G52300	4.9412	0.000253659	4.45256	0.00317654	Up
AT3G13672	AT3G13672	AT3G13672	4.7912	4.82e-05	4.41664	0.00108253	Up
AT1G53625	AT1G53625	AT1G53625	4.40395	0.00110496	4.40396	0.0045319	Up
AT1G17020	SRG1	AT1G17020	2.96349	0.00614424	4.30764	0.000395391	Up
AT5G02020	SIS	AT5G02020	2.46886	0.00721025	4.28982	5.64e-06	Up
AT4G28085	AT4G28085	AT4G28085	3.95651	0.000758395	4.22611	0.00128902	Up
AT1G52890	NAC019	AT1G52890	3.01751	0.003783	4.17913	0.00022147	Up
AT5G54165	AT5G54165	AT5G54165	4.90178	8.38e-07	4.17432	0.000186942	Up
AT2G47190	MYB2	AT2G47190	2.84738	0.0137711	4.02899	0.00155311	Up
AT4G04972	AT4G04972	AT4G04972	3.36065	0.0096847	3.99974	0.00854665	Up
AT5G15500	AT5G15500	AT5G15500	3.89663	0.000644289	3.9332	0.00240295	Up
AT5G62150	AT5G62150	AT5G62150	3.4042	0.000937529	3.91834	0.000624264	Up
AT2G32510	MAPKKK17	AT2G32510	3.99831	0.000907273	3.88977	0.0120719	Up
AT1G55775	AT1G55775	AT1G55775	3.07033	0.0378788	3.87458	0.0242198	Up
AT2G34610	AT2G34610	AT2G34610	5.17297	7.04e-06	3.77936	0.02079	Up
AT1G23120	AT1G23120	AT1G23120	5.10144	5.05e-09	3.77446	0.000114687	Up
AT1G52565	AT1G52565	AT1G52565	3.41436	0.000148668	3.75916	0.000170749	Up
AT5G06230	TBL9	AT5G06230	3.05787	0.0140029	3.74063	0.027451	Up
AT3G01970	WRKY45	AT3G01970	3.15065	0.0035678	3.67296	0.00224403	Up
AT2G15960	AT2G15960	AT2G15960	1.75951	0.0167265	3.63331	7.41e-07	Up
AT4G18990	XTH29	AT4G18990	2.91805	0.0069139	3.59765	0.00661899	Up
AT2G17710	AT2G17710	AT2G17710	2.06451	0.000379053	3.58987	7.23e-09	Up
AT3G49210	AT3G49210	AT3G49210	3.97377	6.89e-06	3.55236	0.000462484	Up
AT5G50260	CEP1	AT5G50260	5.13413	9.99e-05	3.5482	0.0346573	Up
AT4G37010	CEN2 AT4G37010	AT4G37010	3.23022	0.0057617	3.54505	0.00808172	Up
AT5G66170	STR18	AT5G66170	1.30381	0.0346568	3.54434	4.48e-09	Up
AT5G09930	ABCF2	AT5G09930	4.10692	9.85e-05	3.51546	0.0106091	Up
AT2G47770	TSPO	AT2G47770	4.85166	0.000209819	3.50271	0.027009	Up
AT2G43510	TI1	AT2G43510	2.93253	0.00141228	3.44828	0.000692819	Up
AT5G23950	AT5G23950	AT5G23950	4.42834	5.58e-18	3.44087	0.000117774	Up
AT3G44300	NIT2	AT3G44300	3.56671	0.00261949	3.40944	0.0117249	Up
AT1G79900	BAC2	AT1G79900	4.11522	3.8e-06	3.39819	0.00126193	Up
AT4G24000	CSLG2	AT4G24000	3.60566	0.00340952	3.38598	0.021643	Up
AT3G14280	AT3G14280	AT3G14280	3.89067	0.00027502	3.36673	0.00603798	Up
AT1G69490	NAP	AT1G69490	2.77228	0.0136503	3.36634	0.00681277	Up
AT1G29640	AT1G29640	AT1G29640	4.08516	4.98e-08	3.35822	4.97e-05	Up
AT2G14620	XTH10	AT2G14620	2.6513	0.0316983	3.32464	0.0181063	Up
AT2G35382	AT2G35382	AT2G35382	3.89975	0.00158478	3.32428	0.0230697	Up
AT5G20940	AT5G20940	AT5G20940	3.00186	0.00263836	3.3192	0.0117249	Up
AT3G14060	AT3G14060	AT3G14060	4.20286	5.79e-06	3.31801	0.00168569	Up
AT4G13030	AT4G13030	AT4G13030	2.16542	0.00106821	3.31338	9.83e-06	Up
AT3G09910	RABC2b	AT3G09910	2.31774	0.00346863	3.29711	0.00128204	Up
AT5G13330	Rap2.6L	AT5G13330	2.2494	0.0372814	3.28064	0.00602666	Up
AT4G21920	AT4G21920	AT4G21920	3.16164	0.013993	3.21943	0.0439559	Up
AT2G21187	AT2G21187	AT2G21187	3.78071	2.03e-07	3.16643	0.00016895	Up
AT2G45170	ATG8E	AT2G45170	2.00738	0.00853319	3.12577	0.000101764	Up
AT1G07128	AT1G07128	AT1G07128	2.21424	0.00646835	3.07652	0.000654373	Up
AT1G54575	AT1G54575	AT1G54575	2.71596	0.0177059	3.04552	0.0210625	Up
AT2G04100	AT2G04100	AT2G04100	2.54596	0.00363825	3.04389	0.00287323	Up
AT3G18250	AT3G18250	AT3G18250	3.16347	0.00604514	3.02915	0.0232225	Up
AT5G16360	AT5G16360	AT5G16360	2.89185	2.67e-05	3.02247	0.000296718	Up
AT1G48260	CIPK17	AT1G48260	3.1873	0.00606142	2.99192	0.0299297	Up
AT1G02470	AT1G02470	AT1G02470	3.73286	1.11e-08	2.98316	4.67e-05	Up
AT4G37150	MES9	AT4G37150	2.14163	0.00435132	2.96498	0.000321187	Up
AT5G06760	LEA4-5	AT5G06760	5.66108	4.61e-07	2.93334	0.0323882	Up
AT3G04060	NAC046	AT3G04060	2.56067	0.0196053	2.92347	0.0201517	Up
AT5G57785	AT5G57785	AT5G57785	2.43384	0.0181057	2.90063	0.0119579	Up
AT5G01300	AT5G01300	AT5G01300	4.66835	2.23e-05	2.88517	0.0267113	Up
AT1G53870	AT1G53870 AT1G53870	AT1G53870	2.91942	0.00260961	2.87892	0.00941455	Up
AT1G53890	AT1G53870 AT1G53890	AT1G53890	2.92806	0.00253478	2.87892	0.00944522	Up
AT1G02340	HFR1	AT1G02340	2.24845	0.0335425	2.87552	0.0136651	Up
AT5G01520	AIRP2	AT5G01520	2.98435	4.47e-05	2.86563	0.000456186	Up
AT1G70300	KUP6	AT1G70300	1.7371	0.00978449	2.83611	7.6e-05	Up
AT2G07719	AT2G07719	AT2G07719	2.71922	4.86e-06	2.8325	1.66e-05	Up
AT1G06520	GPAT1	AT1G06520	3.93424	0.000118587	2.81924	0.0431479	Up
AT3G02140	TMAC2	AT3G02140	2.71932	0.00276812	2.81564	0.00682521	Up
AT5G02420	AT5G02420	AT5G02420	3.70586	4.01e-07	2.79407	0.0010626	Up
AT1G62370	AT1G62370	AT1G62370	4.76925	2.43e-08	2.76881	0.00912424	Up
AT5G59220	HAI1	AT5G59220	3.6359	0.000832286	2.7611	0.0325264	Up
AT1G53490	HEI10	AT1G53490	2.85335	3.77e-05	2.72856	0.000557334	Up
AT3G45730	AT3G45730	AT3G45730	2.585	0.00846994	2.72507	0.0140333	Up
AT2G21820	AT2G21820	AT2G21820	3.69545	0.000123835	2.71955	0.0145235	Up
AT5G40730	AGP24	AT5G40730	4.20416	3.57e-11	2.71799	0.000186942	Up
AT3G14590	NTMC2T6.2	AT3G14590	2.36226	0.00690434	2.68491	0.00978058	Up
AT1G24600	AT1G24600	AT1G24600	4.37204	2.18e-10	2.68317	0.00080515	Up
AT2G30230	AT2G30230	AT2G30230	2.24983	0.00162096	2.67212	0.00253273	Up
AT1G73010	PS2 AT1G73010	AT1G73010	3.29197	0.00166879	2.6667	0.0344115	Up
AT4G04465	AT4G04465	AT4G04465	2.98815	0.0293333	2.65112	0.0332721	Up
AT3G61900	AT3G61900	AT3G61900	4.11363	8.3e-06	2.63497	0.0165675	Up
AT1G12013	SNOR111	AT1G12013	3.16099	0.00229206	2.63105	0.0147886	Up
AT3G06420	ATG8H	AT3G06420	3.29447	2.12e-07	2.62959	0.000251054	Up
AT3G11600	AT3G11600	AT3G11600	2.21527	0.0006797	2.62787	0.000118774	Up
AT2G44080	ARL	AT2G44080	1.47394	0.0299608	2.60354	0.00022147	Up
AT4G12080	AHL1	AT4G12080	2.77307	1.02e-05	2.59642	0.00140899	Up
ATMG00513	ATMG00513	ATMG00513	2.91439	4.71e-05	2.59099	0.00264304	Up
AT3G03470	CYP89A9	AT3G03470	3.07286	1.63e-05	2.58274	0.00132126	Up
AT3G04010	AT3G04010	AT3G04010	3.11148	0.000646855	2.58231	0.0228985	Up
AT4G02280	SUS3	AT4G02280	3.22692	3.21e-08	2.56339	7.07e-05	Up
AT5G63130	AT5G63130	AT5G63130	3.68135	6.52e-05	2.56332	0.0196739	Up
AT1G28190	AT1G28190	AT1G28190	2.4486	0.0164272	2.55936	0.0295842	Up
AT4G16146	AT4G16146	AT4G16146	4.60719	2.99e-07	2.55792	0.0149869	Up
AT2G15830	AT2G15830	AT2G15830	3.4736	5.66e-08	2.53779	0.00049169	Up
AT1G23040	AT1G23040	AT1G23040	2.78811	8.35e-06	2.51577	0.000314365	Up
AT2G46680	HB-7 AT2G46680	AT2G46680	2.60362	0.000784205	2.50691	0.00429962	Up
AT3G63280	NEK4	AT3G63280	2.97666	0.00137367	2.49703	0.0338128	Up
AT1G69480	AT1G69480	AT1G69480	2.41006	0.0185649	2.46052	0.0449747	Up
ATMG00610	ATMG00610	ATMG00610	2.09494	0.000863065	2.45565	0.000670632	Up
AT4G38060	AT4G38060	AT4G38060	2.84085	1.87e-06	2.41431	0.000296718	Up
AT5G23160	AT5G23160	AT5G23160	2.715	0.00558779	2.40268	0.0321173	Up
AT5G02090	AT5G02090	AT5G02090	2.54859	0.000354742	2.4016	0.0037515	Up
AT4G15248	BBX30	AT4G15248	3.38543	1.47e-08	2.39033	0.000348737	Up
AT5G15190	AT5G15190	AT5G15190	3.72433	4.98e-06	2.3899	0.0147707	Up
AT4G20320	AT4G20320	AT4G20320	3.11948	0.000158518	2.38473	0.0201639	Up
AT3G05937	AT3G05937	AT3G05937	2.87342	8.63e-06	2.38406	0.00108532	Up
AT4G39270	AT4G39270	AT4G39270	2.45683	0.0102621	2.372	0.0378843	Up
AT3G15760	AT3G15760	AT3G15760	2.28872	0.00554179	2.3688	0.0112042	Up
AT1G72200	AT1G72200	AT1G72200	1.75031	0.0226957	2.36809	0.00973444	Up
AT1G45145	TRX5	AT1G45145	2.93756	0.000165306	2.3579	0.00912424	Up
ATMG01200	ATMG01200	ATMG01200	2.03719	0.0163343	2.35735	0.0372958	Up
AT1G63720	AT1G63720	AT1G63720	2.52443	0.0123819	2.35396	0.0474368	Up
AT1G77660	AT1G77660	AT1G77660	1.61663	0.00552589	2.35104	0.000166069	Up
AT4G31875	AT4G31875	AT4G31875	3.81681	1.61e-06	2.34871	0.0144732	Up
AT2G28110	FRA8	AT2G28110	2.28601	0.00518286	2.34079	0.0135302	Up
AT2G07773	AT2G07773	AT2G07773	1.71093	0.0269725	2.34077	0.042271	Up
AT1G19200	AT1G19200	AT1G19200	3.45142	1.02e-05	2.34052	0.0244862	Up
AT4G37520	AT4G37520	AT4G37520	2.13844	0.0123095	2.33574	0.0158587	Up
AT3G48240	AT3G48240	AT3G48240	4.04804	7.61e-07	2.3337	0.0149428	Up
AT5G49450	bZIP1	AT5G49450	1.41228	0.0300895	2.33018	0.00084926	Up
AT3G57680	AT3G57680	AT3G57680	3.13462	7.3e-06	2.31721	0.0050111	Up
AT2G29950	ELF4-L1	AT2G29950	2.95553	0.00133643	2.277	0.0419137	Up
AT5G04545	AT5G04545	AT5G04545	1.81621	0.000492897	2.27524	0.00112818	Up
AT1G32690	AT1G32690	AT1G32690	1.72405	0.00176634	2.26849	0.000114687	Up
AT5G65207	AT5G65207	AT5G65207	2.41754	0.00110469	2.26827	0.00747514	Up
AT1G20440	COR47	AT1G20440	2.78698	6.14e-06	2.25944	0.00119722	Up
AT5G10930	CIPK5	AT5G10930	2.76812	2.42e-05	2.25187	0.00249921	Up
AT2G23320	WRKY15	AT2G23320	2.60153	0.000598841	2.24055	0.0101944	Up
AT4G22920	NYE1	AT4G22920	3.25306	6.51e-09	2.23578	0.000455754	Up
AT1G46768	RAP2.1	AT1G46768	2.75663	4.09e-06	2.23406	0.000909982	Up
AT5G46115	AT5G46115	AT5G46115	2.94487	3.37e-05	2.23329	0.00879076	Up
AT1G06180	MYB13	AT1G06180	1.97521	0.00609148	2.22873	0.00543609	Up
AT2G38400	AGT3	AT2G38400	2.86991	3.99e-05	2.22783	0.00678042	Up
AT1G15405	AT1G15405	AT1G15405	2.20089	0.000676302	2.22561	0.00341055	Up
AT3G13910	AT3G13910	AT3G13910	2.68078	2.58e-10	2.21973	1.17e-06	Up
AT4G31240	AT4G31240	AT4G31240	2.48283	8.31e-05	2.21709	0.00416468	Up
AT1G77145	AT1G77145	AT1G77145	3.01434	2.87e-06	2.21283	0.00390515	Up
AT4G24026	AT4G24026	AT4G24026	2.61995	7.56e-05	2.19461	0.00416468	Up
AT1G05163	AT1G05163	AT1G05163	2.12126	0.0009363	2.16349	0.00411418	Up
AT3G61890	HB-12	AT3G61890	2.41172	0.00103108	2.15504	0.010795	Up
AT1G07040	AT1G07040	AT1G07040	2.36895	2.71e-06	2.15346	0.000135087	Up
ATMG00560	rpl2 ATMG00560	ATMG00560	1.86973	0.0255513	2.15203	0.0387657	Up
AT2G01610	AT2G01610	AT2G01610	3.24922	3.89e-05	2.13847	0.0295842	Up
AT1G29195	AT1G29195	AT1G29195	1.90856	0.000106972	2.13441	0.000134103	Up
AT3G10985	SAG20	AT3G10985	1.77183	0.00659577	2.10666	0.00333954	Up
AT3G27210	AT3G27210	AT3G27210	2.41412	0.00229206	2.10376	0.0288822	Up
AT2G21180	AT2G21180	AT2G21180	2.96627	1.98e-07	2.09703	0.001269	Up
AT3G19960	ATM1	AT3G19960	2.02082	0.00010836	2.07342	0.000314365	Up
AT5G57910	AT5G57910	AT5G57910	2.84589	2.1e-08	2.07122	0.000320154	Up
AT5G64570	XYL4	AT5G64570	2.71349	0.000664775	2.0684	0.0291723	Up
AT4G21980	APG8A	AT4G21980	2.52793	3.88e-07	2.06777	0.000186942	Up
AT4G33040	AT4G33040	AT4G33040	3.07628	0.000149595	2.0587	0.0347306	Up
AT1G25275	AT1G25275	AT1G25275	1.77431	4.43e-05	2.04928	9.83e-06	Up
AT5G67245	AT5G67245	AT5G67245	3.58987	1.67e-14	2.04413	0.000113582	Up
AT2G40110	AT2G40110	AT2G40110	2.46384	4.39e-05	2.03331	0.00411438	Up
ATMG00650	nad4L	ATMG00650	2.35137	0.00151164	2.032	0.0297722	Up
AT4G20260	PCAP1	AT4G20260	2.52474	4.62e-08	2.03018	7.38e-05	Up
AT1G15740	AT1G15740	AT1G15740	1.38483	0.0191253	2.01664	0.00146222	Up
AT4G09695	AT4G09695	AT4G09695	2.08018	5.49e-05	2.00585	0.000109391	Up
AT3G61060	PP2-A13	AT3G61060	1.62426	0.028288	1.98229	0.0178657	Up
AT1G14200	AT1G14200	AT1G14200	1.63099	0.0265823	1.97904	0.0160485	Up
AT3G30180	BR6OX2	AT3G30180	2.65373	4.55e-06	1.97721	0.00333954	Up
AT5G49015	AT5G49015	AT5G49015	2.21944	8.82e-05	1.97606	0.00411438	Up
AT1G63800	UBC5	AT1G63800	2.10422	0.000129524	1.97547	0.00136331	Up
AT2G28400	AT2G28400	AT2G28400	2.7324	0.000889205	1.97269	0.0458794	Up
AT2G33380	RD20	AT2G33380	3.65261	1.59e-10	1.95932	0.00346109	Up
AT2G41380	AT2G41380	AT2G41380	3.21286	2.38e-05	1.95549	0.0357877	Up
AT2G28720	AT2G28720	AT2G28720	1.29351	0.0354309	1.95105	0.00296896	Up
AT3G53650	AT3G53650	AT3G53650	3.15357	1.35e-05	1.94617	0.0315075	Up
AT4G27745	AT4G27745	AT4G27745	2.10852	1.91e-05	1.94412	0.000489822	Up
AT3G10740	ASD1	AT3G10740	1.68665	0.000197296	1.94114	0.000101315	Up
AT4G32940	GAMMA-VPE	AT4G32940	2.0498	0.00247246	1.9287	0.0127839	Up
AT2G06255	ELF4-L3	AT2G06255	3.04979	2.29e-05	1.9282	0.0291746	Up
AT1G33102	AT1G33102	AT1G33102	2.18202	0.000464279	1.91998	0.00780202	Up
AT5G66490	AT5G66490	AT5G66490	2.24053	0.000121159	1.91744	0.00411438	Up
AT3G62650	AT3G62650	AT3G62650	1.22963	0.0295115	1.91528	0.00129821	Up
AT5G45310	AT5G45310	AT5G45310	2.83752	4.22e-05	1.90119	0.0232225	Up
AT3G19380	PUB25	AT3G19380	3.15494	2.81e-11	1.90021	0.000395391	Up
AT1G21920	AT1G21920	AT1G21920	1.80693	0.000405798	1.89336	0.000861453	Up
AT4G37730	bZIP7	AT4G37730	4.26206	0.0132619	1.88834	0.0424396	Up
AT3G09595	AT3G09595	AT3G09595	3.2555	7.66e-05	1.88481	0.0208391	Up
AT2G30360	SIP4	AT2G30360	3.12752	2.78e-06	1.88446	0.023452	Up
AT4G35060	HIPP25	AT4G35060	4.07922	1.42e-12	1.88405	0.00681124	Up
AT3G19660	AT3G19660	AT3G19660	2.48086	2.28e-06	1.881	0.00267328	Up
AT1G22985	CRF7	AT1G22985	2.79047	0.000301269	1.88086	0.0461665	Up
AT3G25290	AT3G25290	AT3G25290	3.16628	6.17e-07	1.87937	0.0145475	Up
AT3G62590	AT3G62590	AT3G62590	2.72437	0.000235314	1.87851	0.0410174	Up
ATMG01380	ATMG01380	ATMG01380	2.78637	6.39e-06	1.87437	0.00774499	Up
AT3G58710	WRKY69	AT3G58710	1.56459	0.00317948	1.8526	0.00268685	Up
AT1G16515	AT1G16515	AT1G16515	3.80524	7.94e-08	1.84631	0.0279482	Up
AT5G06165	AT5G06165	AT5G06165	2.19311	0.000170342	1.84385	0.00688426	Up
AT2G07671	AT2G07671	AT2G07671	2.14611	8.47e-05	1.8401	0.0038232	Up
AT1G08180	AT1G08180	AT1G08180	1.5948	0.000458743	1.82601	0.000200899	Up
AT4G19645	AT4G19645	AT4G19645	1.52947	0.0282421	1.82406	0.0240234	Up
AT3G47420	G3Pp1	AT3G47420	1.96304	0.000113259	1.81797	0.00141252	Up
AT3G11690	AT3G11690	AT3G11690	2.71497	0.000101196	1.81237	0.0310869	Up
AT5G22630	ADT5	AT5G22630	2.18118	0.00301169	1.80636	0.0368997	Up
AT1G54100	ALDH7B4	AT1G54100	2.73859	9.46e-08	1.80432	0.00234686	Up
AT5G13820	TBP1 AT5G13820	AT5G13820	2.12606	0.000130202	1.80149	0.00690081	Up
AT1G44770	AT1G44770	AT1G44770	1.73895	1.31e-05	1.79536	3.6e-05	Up
AT3G08760	ATSIK	AT3G08760	1.77833	0.000554819	1.79046	0.0018087	Up
AT1G25277	AT1G25277	AT1G25277	2.13536	5.4e-05	1.78722	0.00461272	Up
AT4G32870	AT4G32870	AT4G32870	2.26142	2.16e-05	1.77173	0.00366107	Up
AT3G26840	PES2	AT3G26840	2.54788	0.000359862	1.75791	0.0429867	Up
AT3G15770	AT3G15770	AT3G15770	1.4135	0.00288938	1.7524	0.000670648	Up
AT1G13360	AT1G13360	AT1G13360	2.65767	4.31e-07	1.75091	0.00411438	Up
AT5G54080	HGO	AT5G54080	1.8598	0.000286498	1.74594	0.00282634	Up
AT4G34860	A/N-InvB	AT4G34860	2.70601	8.09e-07	1.74007	0.00709539	Up
AT5G03230	AT5G03230	AT5G03230	1.84433	0.00861186	1.73169	0.0358286	Up
AT5G15970	KIN2	AT5G15970	1.6603	0.018756	1.73037	0.0322218	Up
AT5G26731	AT5G26731	AT5G26731	1.61246	0.00209849	1.70132	0.00341055	Up
AT3G13450	DIN4	AT3G13450	1.32361	0.0231551	1.69462	0.00945637	Up
AT3G25870	AT3G25870	AT3G25870	2.67121	3.41e-07	1.69341	0.00716739	Up
AT1G54570	PES1	AT1G54570	3.52083	1.37e-08	1.69255	0.0323123	Up
AT5G10946	AT5G10946	AT5G10946	2.13278	0.00116213	1.69178	0.0335504	Up
ATMG00180	ccmFC	ATMG00180	1.54243	0.00819034	1.67912	0.00755261	Up
AT3G04040	AT3G04040	AT3G04040	2.68204	3.34e-09	1.66629	0.00411438	Up
AT5G17280	AT5G17280	AT5G17280	2.06814	1.49e-21	1.6612	1.08e-13	Up
AT4G09460	MYB6	AT4G09460	1.28908	1.8e-05	1.65906	6.28e-08	Up
AT5G01610	AT5G01610	AT5G01610	1.57652	0.014229	1.6564	0.0237686	Up
AT4G38932	AT4G38932	AT4G38932	1.05623	0.0174726	1.65628	0.000395391	Up
AT1G72060	AT1G72060	AT1G72060	2.04315	0.00288393	1.64583	0.0428948	Up
ATMG01080	atp9	ATMG01080	1.79856	0.00130397	1.64557	0.0125116	Up
AT1G22640	MYB3	AT1G22640	1.17126	0.000257516	1.63677	9.95e-07	Up
AT4G30490	AT4G30490	AT4G30490	1.54208	0.00373751	1.63462	0.00651132	Up
AT2G22800	HAT9	AT2G22800	2.4512	3.7e-06	1.63392	0.00965278	Up
AT5G09595	AT5G09595	AT5G09595	1.03249	0.0434086	1.63197	0.00122169	Up
AT2G46670	AT2G46670	AT2G46670	2.38837	1.8e-13	1.62383	4.67e-06	Up
AT3G14430	AT3G14430	AT3G14430	1.9561	7.36e-09	1.62355	1.34e-05	Up
AT4G01060	CPL3 AT4G01060	AT4G01060	3.05126	1.83e-05	1.62345	0.0364609	Up
AT4G31510	AT4G31510	AT4G31510	1.29435	0.0141561	1.62338	0.00520094	Up
AT2G36950	AT2G36950	AT2G36950	2.6497	2.49e-06	1.6215	0.0167795	Up
AT3G02910	AT3G02910	AT3G02910	2.75851	1.36e-07	1.61615	0.00944522	Up
AT4G29850	AT4G29850	AT4G29850	1.5938	0.0146518	1.6161	0.0496962	Up
AT1G04280	AT1G04280	AT1G04280	1.37951	0.0130948	1.61116	0.00892156	Up
AT4G14305	AT4G14305	AT4G14305	1.82258	0.000138738	1.60719	0.00430811	Up
AT5G27350	SFP1	AT5G27350	1.92656	0.00120577	1.60705	0.021935	Up
AT3G55560	AGF2	AT3G55560	1.66439	0.00616833	1.60145	0.0238733	Up
AT5G24655	LSU4	AT5G24655	2.18417	0.000309242	1.59572	0.0278074	Up
AT5G54840	SGP1	AT5G54840	2.18031	0.000127247	1.58619	0.019387	Up
AT2G07725	rpl5 AT2G07725	AT2G07725	2.08471	0.000634773	1.58561	0.0320584	Up
AT1G01780	PLIM2b	AT1G01780	1.51428	0.000298791	1.56271	0.00105099	Up
AT5G48412	AT5G48412	AT5G48412	2.08995	1.77e-05	1.56196	0.00502967	Up
AT1G52720	AT1G52720	AT1G52720	1.78907	0.00130419	1.55336	0.0166634	Up
AT4G39925	AT4G39925	AT4G39925	1.96822	3.43e-05	1.54892	0.00310255	Up
AT2G01540	AT2G01540	AT2G01540	1.7524	9.9e-06	1.54729	0.000494597	Up
AT3G13700	AT3G13700	AT3G13700	1.63976	0.00120929	1.54215	0.0123822	Up
AT3G13710	PRA1.F4	AT3G13710	1.63976	0.00121074	1.54214	0.0123875	Up
AT3G14560	AT3G14560	AT3G14560	2.18979	2.88e-06	1.53891	0.00616527	Up
AT2G24040	AT2G24040	AT2G24040	2.39785	4.47e-13	1.53793	3.57e-05	Up
AT1G26558	AT1G26558	AT1G26558	1.2596	0.0241323	1.53099	0.0364072	Up
AT3G60690	AT3G60690	AT3G60690	2.27961	0.000259471	1.5222	0.0437916	Up
AT5G23230	NIC2	AT5G23230	1.36558	0.0208671	1.52135	0.03248	Up
AT2G16720	MYB7	AT2G16720	2.57576	1.05e-05	1.51628	0.0357071	Up
AT1G53580	GLY3	AT1G53580	1.65516	2.28e-05	1.51598	0.000519485	Up
AT1G56145	AT1G56145	AT1G56145	1.6912	0.00488646	1.51577	0.0278015	Up
AT4G39090	RD19	AT4G39090	1.43555	0.0037512	1.50847	0.00668387	Up
AT3G60640	ATG8G	AT3G60640	2.12576	7.36e-09	1.50107	0.000390644	Up
AT5G55860	AT5G55860	AT5G55860	1.46406	0.0009628	1.4979	0.00267328	Up
AT2G41200	AT2G41200	AT2G41200	2.11121	3.6e-09	1.49688	0.00018204	Up
AT3G55470	AT3G55470	AT3G55470	2.09531	0.000447049	1.49365	0.0368347	Up
AT4G39955	AT4G39955	AT4G39955	2.74979	4.66e-06	1.49173	0.0490589	Up
AT4G04620	ATG8B	AT4G04620	1.71892	4.32e-05	1.48896	0.0017851	Up
AT1G47128	RD21A	AT1G47128	1.81167	4.62e-05	1.48894	0.00337048	Up
AT5G55170	SUMO3	AT5G55170	1.53851	0.00641532	1.48853	0.020828	Up
AT1G22930	AT1G22930	AT1G22930	1.78406	0.00105199	1.48851	0.0193545	Up
AT1G32460	AT1G32460	AT1G32460	1.62613	4.7e-05	1.48567	0.000939335	Up
AT1G58030	CAT2 AT1G58030	AT1G58030	1.23369	0.00670716	1.48353	0.00335007	Up
AT3G11591	AT3G11591	AT3G11591	1.87295	0.0128152	1.48036	0.0470562	Up
ATMG09740	ATMG09740	ATMG09740	1.83289	0.00741195	1.47807	0.0361531	Up
AT1G46554	AT1G46554	AT1G46554	2.54159	8.53e-06	1.46779	0.0366639	Up
AT1G66730	LIG6	AT1G66730	2.22155	5.5e-05	1.4669	0.0330121	Up
AT1G01490	AT1G01490	AT1G01490	1.45375	1.61e-05	1.45324	8.4e-05	Up
AT1G08230	AT1G08230	AT1G08230	2.22674	6.98e-06	1.45065	0.0130828	Up
AT5G10860	CBSX3	AT5G10860	1.02489	0.00417032	1.44883	0.000133811	Up
AT3G23920	BAM1 AT3G23920	AT3G23920	2.22929	1.23e-07	1.44493	0.0031333	Up
AT3G06780	AT3G06780	AT3G06780	1.38471	0.00226591	1.44372	0.00497978	Up
AT1G76180	ERD14	AT1G76180	2.128	1.89e-08	1.43811	0.000851468	Up
AT4G25690	AT4G25690	AT4G25690	1.37122	0.000262122	1.43255	0.000489822	Up
AT1G76560	CP12-3	AT1G76560	1.01315	0.0375806	1.42904	0.00497646	Up
AT1G05060	AT1G05060	AT1G05060	1.23252	0.00765513	1.42231	0.00578105	Up
AT3G09085	AT3G09085	AT3G09085	1.93869	5.32e-13	1.4193	7.41e-07	Up
AT1G56700	AT1G56700	AT1G56700	1.44518	0.0075291	1.41685	0.0236656	Up
AT3G51730	AT3G51730	AT3G51730	1.8185	0.000727249	1.40823	0.0270034	Up
AT1G15100	RHA2A	AT1G15100	3.25423	4.01e-13	1.39814	0.00945637	Up
AT2G26355	AT2G26355	AT2G26355	1.87451	0.000452487	1.39612	0.0281927	Up
AT3G51960	BZIP24	AT3G51960	1.42396	0.00174559	1.39448	0.016161	Up
AT5G04760	AT5G04760	AT5G04760	1.55636	0.00299149	1.39181	0.0235411	Up
AT2G25964	AT2G25964	AT2G25964	1.97977	3.45e-05	1.39071	0.0103363	Up
AT4G20930	AT4G20930	AT4G20930	2.04976	2.56e-05	1.38956	0.0198137	Up
AT3G05880	RCI2A	AT3G05880	1.91754	0.00105199	1.3856	0.0485274	Up
AT1G36380	AT1G36380	AT1G36380	1.77803	1.89e-05	1.38167	0.00398436	Up
AT4G12850	AT4G12850	AT4G12850	1.19985	0.0126915	1.38139	0.0132184	Up
AT1G15400	AT1G15400	AT1G15400	1.36001	3.51e-05	1.37732	0.000129179	Up
AT2G41780	AT2G41780	AT2G41780	1.30541	0.0237786	1.36908	0.0323494	Up
AT2G31130	AT2G31130	AT2G31130	1.92439	7.55e-05	1.36645	0.0182608	Up
AT3G12630	SAP5	AT3G12630	1.63459	7.72e-08	1.36148	4.67e-05	Up
AT4G22820	AT4G22820	AT4G22820	2.27267	2.44e-05	1.36095	0.0378787	Up
AT1G52347	AT1G52347	AT1G52347	1.72109	1.31e-06	1.35425	0.000850881	Up
AT1G09740	AT1G09740	AT1G09740	1.72783	0.00162955	1.35301	0.042271	Up
AT3G54363	AT3G54363	AT3G54363	1.44798	0.000283148	1.35032	0.00197206	Up
AT5G37740	AT5G37740	AT5G37740	1.49007	0.00309342	1.34623	0.0227061	Up
AT5G43260	AT5G43260	AT5G43260	2.24322	6.63e-09	1.34332	0.00296896	Up
AT1G74740	CPK30	AT1G74740	1.61714	0.000176336	1.34243	0.00656884	Up
AT1G11530	CXXS1	AT1G11530	1.16369	0.000727249	1.34235	0.000379125	Up
AT5G54640	RAT5	AT5G54640	1.29149	0.00813347	1.33578	0.016112	Up
AT5G49280	AT5G49280	AT5G49280	1.79842	0.000330704	1.33343	0.0227683	Up
AT3G53730	AT3G53730	AT3G53730	1.5789	0.000627231	1.33205	0.0123822	Up
AT3G60110	AT3G60110	AT3G60110	1.46405	0.00571589	1.33204	0.0386235	Up
AT5G49710	AT5G49710	AT5G49710	1.12547	0.00293003	1.32829	0.00162988	Up
AT4G24590	AT4G24590	AT4G24590	1.74306	3.01e-10	1.32022	1.59e-05	Up
AT5G63905	AT5G63905	AT5G63905	2.07403	2.92e-06	1.32012	0.0134947	Up
AT1G54210	ATG12A	AT1G54210	1.83007	0.000122041	1.31919	0.0210625	Up
AT1G53170	ERF8	AT1G53170	1.69027	0.00112151	1.31877	0.0308392	Up
AT2G40880	CYSA	AT2G40880	1.47861	5.66e-08	1.31668	8.18e-06	Up
AT5G10740	AT5G10740	AT5G10740	1.34877	0.0106328	1.31335	0.030935	Up
AT3G10250	AT3G10250	AT3G10250	1.42351	0.00064602	1.31228	0.00587418	Up
AT5G54730	G18F	AT5G54730	1.74142	0.000366506	1.3092	0.0263818	Up
AT2G24260	LRL1	AT2G24260	1.16061	0.00336885	1.30353	0.000472063	Up
AT3G21790	AT3G21790	AT3G21790	1.94623	3.61e-06	1.30152	0.00923807	Up
AT2G21185	AT2G21185	AT2G21185	1.09476	0.0363097	1.29922	0.0277674	Up
AT1G15110	PSS1	AT1G15110	2.04418	5.42e-05	1.29615	0.0420309	Up
AT3G17820	GLN1.3	AT3G17820	1.88267	1.47e-05	1.29258	0.011481	Up
AT2G43540	AT2G43540	AT2G43540	1.62037	2.01e-05	1.28885	0.00278206	Up
AT2G21620	RD2	AT2G21620	2.33873	1.86e-08	1.28436	0.00945637	Up
AT2G24100	ASG1 AT2G24100	AT2G24100	1.11499	0.00204268	1.28383	0.00098349	Up
AT3G52105	AT3G52105	AT3G52105	1.51749	1.06e-06	1.2809	0.000221389	Up
AT2G18170	MPK7	AT2G18170	1.30444	0.00128422	1.27706	0.00610946	Up
AT5G44790	RAN1	AT5G44790	1.24483	4.71e-05	1.27704	0.000117774	Up
AT4G16110	AT4G16110	AT4G16110	1.87996	2.13e-06	1.26917	0.00511972	Up
AT2G31090	AT2G31090	AT2G31090	1.46573	1.47e-06	1.26844	0.000202648	Up
AT3G01430	AT3G01430	AT3G01430	1.2663	0.0102717	1.26214	0.0233416	Up
AT5G43403	AT5G43403	AT5G43403	1.07591	0.00175639	1.26193	0.000204245	Up
AT5G54470	BBX29	AT5G54470	2.48344	2.51e-07	1.25742	0.0284709	Up
AT3G03310	LCAT3	AT3G03310	1.52875	0.00263461	1.25653	0.0364072	Up
AT1G23440	AT1G23440	AT1G23440	1.93672	6.85e-05	1.25631	0.0325374	Up
AT3G49800	AT3G49800	AT3G49800	1.29519	7.17e-05	1.25482	0.000477235	Up
AT1G60140	TPS10 AT1G60140	AT1G60140	1.35337	0.000697577	1.24426	0.0115176	Up
AT5G66360	DIM1B	AT5G66360	1.31235	2.37e-06	1.23811	1.55e-05	Up
AT1G48490	AT1G48490	AT1G48490	1.24756	0.00011024	1.23401	0.000555448	Up
AT1G71130	CRF8	AT1G71130	1.10911	0.0175815	1.23378	0.02077	Up
AT4G27020	AT4G27020	AT4G27020	1.36654	8.95e-05	1.23332	0.00169007	Up
AT3G51880	HMGB1	AT3G51880	1.05017	0.000280543	1.23214	7.98e-05	Up
AT1G53560	AT1G53560	AT1G53560	1.71903	0.000622812	1.23039	0.0431713	Up
AT4G21740	AT4G21740	AT4G21740	1.18804	0.00178546	1.22626	0.00335928	Up
AT4G36790	AT4G36790	AT4G36790	1.05613	0.00123412	1.22474	0.000284651	Up
AT1G21770	AT1G21770	AT1G21770	1.7874	8.14e-07	1.20552	0.00411438	Up
AT3G17810	PYD1	AT3G17810	1.67455	0.000300506	1.2041	0.0299579	Up
AT2G27490	ATCOAE	AT2G27490	1.41407	7.76e-06	1.20025	0.000718881	Up
AT3G07260	AT3G07260	AT3G07260	1.24515	0.000283817	1.19369	0.000296718	Up
AT4G32850	nPAP	AT4G32850	1.2154	2.66e-05	1.19338	0.000170766	Up
AT1G45163	AT1G45163	AT1G45163	1.53766	0.000153422	1.18411	0.00533866	Up
AT5G43740	AT5G43740	AT5G43740	1.03279	0.00626717	1.18337	0.00317654	Up
AT4G16520	ATG8F	AT4G16520	1.21582	0.00452782	1.18225	0.0166555	Up
AT2G16595	AT2G16595	AT2G16595	1.44684	0.000205632	1.17714	0.00744878	Up
AT1G15350	AT1G15350	AT1G15350	1.58482	3.41e-05	1.1724	0.0092398	Up
AT5G67600	WIH1	AT5G67600	1.50873	0.000878899	1.172	0.0288773	Up
AT2G21940	SK1	AT2G21940	1.22465	6.74e-05	1.16795	0.000628677	Up
AT5G65495	AT5G65495	AT5G65495	1.83066	2.53e-10	1.16365	0.000503473	Up
AT4G34680	GATA3	AT4G34680	1.17712	0.00995387	1.1619	0.0231777	Up
AT4G30390	AT4G30390	AT4G30390	1.6593	0.000170584	1.15815	0.0308392	Up
AT5G07730	AT5G07730	AT5G07730	1.74391	1.86e-05	1.1545	0.0243701	Up
AT5G12190	AT5G12190	AT5G12190	1.63798	1.48e-10	1.14859	6.46e-05	Up
AT2G07718	AT2G07718	AT2G07718	1.57438	3.73e-05	1.14521	0.0105957	Up
AT1G19396	AT1G19396	AT1G19396	1.52743	0.00107674	1.14466	0.0362194	Up
AT5G55850	NOI	AT5G55850	1.86244	8.61e-08	1.14369	0.00495321	Up
AT1G06570	PDS1	AT1G06570	1.76627	1.43e-06	1.14363	0.00788143	Up
AT5G43060	RD21B	AT5G43060	1.53908	0.00114288	1.13613	0.048406	Up
AT3G42150	AT3G42150	AT3G42150	1.29988	8.93e-15	1.13394	9.61e-12	Up
AT2G46030	UBC6	AT2G46030	1.72354	2.7e-05	1.13307	0.0227061	Up
AT1G65000	AT1G65000	AT1G65000	1.44303	0.00023921	1.12803	0.018646	Up
AT2G44360	AT2G44360	AT2G44360	1.18118	2.5e-07	1.12682	5.91e-06	Up
AT1G17080	AT1G17080	AT1G17080	1.5766	1.67e-06	1.12635	0.0030739	Up
AT3G17100	AT3G17100	AT3G17100	1.17476	8.7e-05	1.12588	0.000800017	Up
AT3G13720	PRA8	AT3G13720	1.64692	2.39e-08	1.11394	0.000938697	Up
AT4G31860	AT4G31860	AT4G31860	1.26593	0.00659361	1.11165	0.0413097	Up
AT4G33100	AT4G33100	AT4G33100	1.41131	0.000195321	1.11008	0.00776543	Up
AT1G02816	AT1G02816	AT1G02816	2.44537	1.87e-10	1.10811	0.0182024	Up
AT2G05630	ATG8D	AT2G05630	1.51884	0.00027502	1.10396	0.0273763	Up
AT4G34990	MYB32	AT4G34990	1.31697	0.00234013	1.10025	0.0253038	Up
AT5G18640	AT5G18640	AT5G18640	1.24529	0.00337054	1.09409	0.0347306	Up
AT5G48180	NSP5	AT5G48180	2.22654	6.72e-08	1.09277	0.0314234	Up
AT5G22850	AT5G22850	AT5G22850	1.71437	6.27e-07	1.09011	0.00677585	Up
AT5G41800	AT5G41800	AT5G41800	1.52494	0.00010456	1.08527	0.0271391	Up
AT1G64750	DSS1(I)	AT1G64750	1.22467	1.69e-09	1.07968	6.19e-07	Up
AT5G06280	AT5G06280	AT5G06280	1.57482	3.63e-05	1.07436	0.0164844	Up
AT2G45315	AT2G45315	AT2G45315	1.3331	0.000974072	1.07188	0.0101944	Up
AT5G13800	PPH	AT5G13800	1.88622	2.69e-06	1.06898	0.0297722	Up
AT2G23090	AT2G23090	AT2G23090	1.42	1.12e-10	1.06651	9.38e-06	Up
AT3G62920	AT3G62920	AT3G62920	1.30996	2.01e-06	1.06357	0.000777587	Up
AT2G19180	AT2G19180	AT2G19180	1.17129	0.000368995	1.06022	0.00423099	Up
AT1G12390	AT1G12390	AT1G12390	1.06673	1.75e-08	1.05683	5.62e-08	Up
AT5G03490	AT5G03490	AT5G03490	1.21974	0.00500069	1.05509	0.0289899	Up
AT4G26810	AT4G26810	AT4G26810	1.16444	0.000974794	1.05491	0.00574571	Up
AT5G67490	AT5G67490	AT5G67490	1.7982	4.74e-09	1.05471	0.00318136	Up
AT3G27100	AT3G27100	AT3G27100	1.23413	1.44e-08	1.05206	9.31e-06	Up
AT1G52540	AT1G52540	AT1G52540	1.65387	2.63e-10	1.05199	0.000395988	Up
AT5G08565	AT5G08565	AT5G08565	1.81057	3.23e-07	1.05148	0.0139911	Up
AT5G64180	AT5G64180	AT5G64180	1.20943	0.00127524	1.04541	0.0154441	Up
AT1G62040	ATG8C	AT1G62040	1.42549	2.11e-07	1.04447	0.000916134	Up
AT4G01710	CRK AT4G01710	AT4G01710	1.2972	1.02e-05	1.04111	0.00209543	Up
AT5G63880	VPS20.1	AT5G63880	1.66405	4.76e-05	1.03717	0.0423238	Up
AT2G31570	GPX2	AT2G31570	2.11456	7.64e-14	1.03561	0.00169007	Up
AT4G02370	AT4G02370	AT4G02370	1.50165	3.79e-05	1.03508	0.0164249	Up
AT4G20300	AT4G20300	AT4G20300	1.28449	1.12e-08	1.03238	2.47e-05	Up
AT3G26395	AT3G26395	AT3G26395	1.26753	3.54e-05	1.02609	0.00276589	Up
AT1G31460	AT1G31460	AT1G31460	1.43729	0.000693622	1.02593	0.0274103	Up
AT3G15580	APG8H	AT3G15580	1.53224	3.92e-05	1.01984	0.023343	Up
AT1G22403	AT1G22403	AT1G22403	1.69668	2.17e-06	1.01693	0.0121875	Up
AT2G17350	AT2G17350	AT2G17350	1.24174	4.61e-07	1.01611	0.000270657	Up
AT5G20650	COPT5	AT5G20650	1.36022	3.45e-10	1.01103	2.36e-05	Up
AT1G47750	PEX11A	AT1G47750	1.08672	0.00018326	1.00669	0.00262082	Up
AT2G33150	PKT3	AT2G33150	1.90491	4.37e-08	1.00609	0.0164249	Up
AT4G06598	AT4G06598	AT4G06598	-3.7342	0.00657419	-5.60037	0.000466323	Down
AT2G22810	ACS4	AT2G22810	-5.33487	0.00244032	-4.25136	0.0235557	Down
AT4G21880	AT4G21880	AT4G21880	-3.60112	0.0186479	-4.05749	0.00533866	Down
AT1G43605	AT1G43605	AT1G43605	-6.37116	0.000165479	-3.78617	0.0054871	Down
AT5G46220	AT5G46220	AT5G46220	-3.62226	0.00739262	-3.37988	0.00939226	Down
AT3G25493	AT3G25493	AT3G25493	-3.20561	0.00234442	-3.21916	0.00728263	Down
AT5G23810	AAP7	AT5G23810	-3.10376	0.0222831	-3.1741	0.0386235	Down
ATCG00290	ATCG00290	ATCG00290	-2.75116	1.43e-07	-3.07591	1.36e-09	Down
AT4G29610	AT4G29610	AT4G29610	-3.6543	0.00689732	-2.89257	0.0265665	Down
AT3G62930	AT3G62930	AT3G62930	-4.10492	0.00013463	-2.77124	0.0156163	Down
AT5G46710	AT5G46710	AT5G46710	-2.85498	0.012534	-2.57763	0.0217172	Down
AT3G21460	AT3G21460	AT3G21460	-2.57617	0.0193204	-2.56513	0.0386445	Down
AT1G15580	IAA5	AT1G15580	-5.32695	0.00112111	-2.48192	0.0357749	Down
AT2G14520	AT2G14520	AT2G14520	-2.41335	0.0172767	-2.38547	0.00411438	Down
AT3G26960	AT3G26960	AT3G26960	-2.44943	0.000155324	-2.37598	0.000624264	Down
AT3G62950	AT3G62950	AT3G62950	-2.8075	0.0036033	-2.30893	0.031574	Down
AT5G05580	FAD8	AT5G05580	-3.6544	1.18e-09	-2.25769	0.000139299	Down
AT3G17640	AT3G17640	AT3G17640	-3.49089	0.00071454	-2.24203	0.0474368	Down
AT4G01080	TBL26	AT4G01080	-2.23028	0.00363597	-2.23538	0.00847416	Down
AT4G12830	AT4G12830	AT4G12830	-3.2643	9.87e-08	-2.22564	3.23e-05	Down
AT4G13577	AT4G13577	AT4G13577	-2.09115	0.0111971	-2.15682	0.015021	Down
AT4G25630	FIB2	AT4G25630	-2.76241	0.00191252	-2.07117	0.0355076	Down
AT1G29660	AT1G29660	AT1G29660	-5.62147	1.59e-12	-2.05819	0.0326645	Down
AT1G79770	AT1G79770	AT1G79770	-2.5778	0.00374437	-1.99522	0.0225445	Down
AT2G42865	AT2G42865	AT2G42865	-3.70806	0.0183099	-1.98273	0.0245216	Down
AT5G07690	MYB29	AT5G07690	-3.41955	1.09e-05	-1.9464	0.024322	Down
AT5G63780	SHA1	AT5G63780	-2.71591	1.29e-09	-1.94584	2.73e-06	Down
AT5G11790	NDL2	AT5G11790	-2.59223	1.57e-05	-1.94168	0.00186096	Down
AT1G29670	AT1G29670	AT1G29670	-4.7223	1.02e-11	-1.93855	0.0136651	Down
AT2G43550	AT2G43550	AT2G43550	-2.76846	0.000129886	-1.93112	0.0154794	Down
ATCG00560	psbL	ATCG00560	-1.90886	4.5e-05	-1.92219	0.000164259	Down
AT2G23590	MES8	AT2G23590	-3.96278	0.00402732	-1.91517	0.0311504	Down
AT3G20350	AT3G20350	AT3G20350	-4.2676	0.000949472	-1.90809	0.00957254	Down
AT4G29400	AT4G29400	AT4G29400	-1.31009	0.0160577	-1.90623	0.00111004	Down
AT5G03552	ath-MIR822	AT5G03552	-2.9561	0.000275995	-1.86406	0.0118698	Down
AT1G09310	AT1G09310	AT1G09310	-3.29445	9.08e-08	-1.86326	0.0107102	Down
AT4G04940	AT4G04940	AT4G04940	-1.64276	0.0327542	-1.85478	0.00635056	Down
AT4G16570	PRMT7	AT4G16570	-1.3502	0.0408585	-1.84735	0.00939226	Down
AT3G03780	MS2 AT3G03780	AT3G03780	-2.19765	9.16e-06	-1.80826	0.00105099	Down
AT4G37800	XTH7	AT4G37800	-4.73934	1.04e-10	-1.80627	0.0414943	Down
AT2G35860	FLA16	AT2G35860	-3.75795	2.51e-06	-1.76699	0.0482878	Down
AT3G49660	WDR5a	AT3G49660	-1.40484	0.0188339	-1.75691	0.000134103	Down
AT2G33210	HSP60-2	AT2G33210	-1.95694	0.000652102	-1.74831	0.00135103	Down
AT3G23450	AT3G23450	AT3G23450	-2.74775	0.000127955	-1.74743	0.0395097	Down
AT3G15570	AT3G15570	AT3G15570	-4.08776	3.16e-07	-1.74474	0.0219642	Down
AT1G55205	AT1G55205	AT1G55205	-2.56787	0.010606	-1.74464	0.00605002	Down
AT1G56050	AT1G56050	AT1G56050	-1.59247	0.000213302	-1.73767	8.75e-05	Down
AT3G18130	RACK1C_AT	AT3G18130	-2.6265	9.68e-07	-1.73317	0.00317654	Down
AT1G27470	AT1G27470	AT1G27470	-1.82478	0.00843554	-1.7208	0.00935963	Down
AT2G27130	AT2G27130	AT2G27130	-2.13648	0.000470575	-1.7201	0.00871465	Down
AT4G20760	AT4G20760	AT4G20760	-2.55394	4.01e-07	-1.71067	0.000389659	Down
AT1G69200	FLN2	AT1G69200	-2.63509	9.21e-05	-1.67523	0.0170012	Down
AT2G26750	AT2G26750	AT2G26750	-2.29822	7.79e-05	-1.67308	0.00342443	Down
AT1G31660	AT1G31660	AT1G31660	-1.46039	0.00520942	-1.66733	0.0018087	Down
AT2G08555	ath-MIR8170	AT2G08555	-1.97561	0.0110993	-1.65598	0.0072968	Down
AT3G51600	LTP5	AT3G51600	-3.34552	7.49e-11	-1.65298	0.00661545	Down
AT3G23940	AT3G23940	AT3G23940	-2.33269	0.000953136	-1.65055	0.0277898	Down
ATCG00710	psbH	ATCG00710	-1.72489	0.00894956	-1.64676	0.0229006	Down
AT3G24480	AT3G24480	AT3G24480	-3.33931	5.87e-09	-1.64159	0.00945637	Down
AT5G13650	SVR3	AT5G13650	-1.80101	7.55e-10	-1.63792	7.44e-08	Down
AT5G14100	ABCI11	AT5G14100	-1.3567	0.013743	-1.62579	0.00205816	Down
AT3G15030	TCP4	AT3G15030	-1.96279	4.26e-05	-1.62322	0.000964305	Down
AT1G18090	AT1G18090	AT1G18090	-1.28554	0.0263871	-1.6192	0.0092398	Down
AT3G14940	PPC3	AT3G14940	-1.78337	0.0270534	-1.61181	0.0373858	Down
AT3G12670	emb2742	AT3G12670	-1.5093	0.0016369	-1.61092	0.000851468	Down
AT5G40480	EMB3012	AT5G40480	-1.84844	0.00273249	-1.59486	0.00361127	Down
AT4G12840	AT4G12840	AT4G12840	-2.03244	0.00107126	-1.58912	0.00498771	Down
AT3G47930	GLDH	AT3G47930	-1.07844	0.00657121	-1.58308	8.61e-05	Down
AT3G18240	AT3G18240	AT3G18240	-1.12912	0.0251897	-1.58143	0.000471252	Down
AT5G61420	MYB28	AT5G61420	-1.91862	0.000751278	-1.58009	0.0129897	Down
AT1G15980	PnsB1	AT1G15980	-2.38701	8.93e-08	-1.57682	0.001269	Down
AT3G11170	FAD7	AT3G11170	-2.52438	1.67e-14	-1.57617	5.57e-06	Down
AT2G31170	SYCO ARATH	AT2G31170	-3.36488	8.12e-08	-1.5675	0.00168569	Down
AT3G28460	AT3G28460	AT3G28460	-2.05543	9.84e-06	-1.56552	0.0010316	Down
AT2G40280	AT2G40280	AT2G40280	-1.0427	0.00141154	-1.56468	4.54e-07	Down
AT3G18600	AT3G18600	AT3G18600	-1.86549	0.00767021	-1.56396	0.0308045	Down
AT2G28450	AT2G28450	AT2G28450	-2.23136	0.000113566	-1.56129	0.00338077	Down
AT4G39770	TPPH	AT4G39770	-2.13555	0.00130397	-1.54615	0.0350438	Down
AT3G53940	AT3G53940	AT3G53940	-1.67454	0.0180636	-1.54594	0.0189196	Down
AT2G35260	AT2G35260	AT2G35260	-2.82584	1.78e-20	-1.54431	1.7e-06	Down
AT5G13400	AT5G13400	AT5G13400	-1.76933	0.00165342	-1.5383	0.0105637	Down
AT4G27720	AT4G27720	AT4G27720	-3.21936	2.77e-09	-1.53624	0.0104614	Down
AT1G18360	AT1G18360	AT1G18360	-1.75972	0.00698044	-1.53482	0.0273763	Down
AT5G02180	AT5G02180	AT5G02180	-1.20988	0.0197498	-1.53397	0.003909	Down
AT1G60600	ABC4	AT1G60600	-2.21754	1e-05	-1.51163	0.00497646	Down
AT1G68890	PHYLLO	AT1G68890	-2.32697	6.19e-05	-1.5102	0.0165535	Down
AT2G30200	EMB3147	AT2G30200	-2.26406	0.00018234	-1.49891	0.0290493	Down
AT3G29230	AT3G29230	AT3G29230	-1.74463	0.00132105	-1.49419	0.00593643	Down
AT5G11250	AT5G11250	AT5G11250	-1.87995	0.00134081	-1.49194	0.0248964	Down
AT3G15480	AT3G15480	AT3G15480	-2.82491	7.39e-13	-1.47809	0.000642867	Down
AT5G61130	PDCB1	AT5G61130	-2.54733	1.52e-07	-1.4773	0.00749483	Down
AT2G35650	CSLA07	AT2G35650	-1.4794	0.00154659	-1.47679	0.00135103	Down
AT3G52750	FTSZ2-2	AT3G52750	-2.44123	2.39e-07	-1.47042	0.00139303	Down
AT3G27230	AT3G27230	AT3G27230	-1.79783	8.29e-06	-1.46991	0.000422383	Down
AT4G21210	RP1 AT4G21210	AT4G21210	-1.23072	0.00333032	-1.4676	0.00127056	Down
AT1G80270	PPR596	AT1G80270	-1.9571	0.00146072	-1.46488	0.01304	Down
AT5G25610	RD22	AT5G25610	-1.55743	0.0138667	-1.45745	0.0482117	Down
AT1G12900	GAPA-2	AT1G12900	-3.0255	2.68e-11	-1.4567	0.00689854	Down
AT3G18890	Tic62	AT3G18890	-2.50411	6.11e-09	-1.45387	0.00193613	Down
AT1G04420	AT1G04420	AT1G04420	-2.70107	9.52e-10	-1.45004	0.00278206	Down
AT5G27560	AT5G27560	AT5G27560	-1.3287	3.27e-06	-1.44748	1.44e-07	Down
AT1G52510	AT1G52510	AT1G52510	-2.24658	5.46e-08	-1.44687	0.000518013	Down
AT3G06550	RWA2	AT3G06550	-1.49089	0.00174953	-1.44464	0.00635056	Down
AT1G11790	ADT1	AT1G11790	-1.74107	1.41e-05	-1.44444	0.000455754	Down
AT1G75280	AT1G75280	AT1G75280	-2.00701	0.00021293	-1.44245	0.0222096	Down
AT1G09900	AT1G09900	AT1G09900	-1.94963	2.01e-06	-1.4371	4.92e-05	Down
AT1G49380	AT1G49380	AT1G49380	-2.8058	7.41e-11	-1.43112	0.000295003	Down
AT5G23310	FSD3	AT5G23310	-2.31077	4.02e-05	-1.43031	0.0205445	Down
AT5G55920	OLI2	AT5G55920	-1.90843	0.000101891	-1.42908	0.00431382	Down
AT1G26130	AT1G26130	AT1G26130	-1.50227	0.00479515	-1.42903	0.00916403	Down
AT1G70280	AT1G70280	AT1G70280	-2.94923	6.07e-07	-1.42057	0.0259572	Down
AT1G79150	AT1G79150	AT1G79150	-1.54863	0.0147596	-1.41877	0.02077	Down
AT2G29540	RPC14	AT2G29540	-1.20838	0.0279929	-1.41674	0.00741028	Down
AT4G13575	AT4G13575	AT4G13575	-2.59376	1.31e-06	-1.41164	0.0200676	Down
AT1G43670	FBP	AT1G43670	-2.03041	3.27e-10	-1.39955	8.32e-05	Down
AT1G61240	AT1G61240	AT1G61240	-1.23858	0.0242401	-1.39652	0.0154011	Down
AT4G14740	AT4G14740	AT4G14740	-3.44772	1.13e-08	-1.39287	0.0236883	Down
AT5G07020	AT5G07020	AT5G07020	-1.76648	3.8e-10	-1.39081	3.47e-06	Down
AT5G09870	CESA5	AT5G09870	-2.05731	4.55e-05	-1.38756	0.0169269	Down
AT1G42970	GAPB	AT1G42970	-2.25565	1.96e-08	-1.38413	0.00296735	Down
AT1G17850	AT1G17850	AT1G17850	-2.94382	3.87e-05	-1.38321	0.0292617	Down
AT5G04360	LDA	AT5G04360	-1.6136	0.00660552	-1.38091	0.021397	Down
AT5G46580	AT5G46580	AT5G46580	-2.362	1.76e-08	-1.38024	0.0019076	Down
AT3G26060	PRXQ	AT3G26060	-3.23495	6.38e-10	-1.37715	0.0277454	Down
AT5G65440	AT5G65440	AT5G65440	-2.5375	9.46e-06	-1.37466	0.00905849	Down
AT3G49680	BCAT3	AT3G49680	-1.68916	0.000155356	-1.37049	0.00493236	Down
AT3G54260	TBL36	AT3G54260	-1.88532	0.0130647	-1.36777	0.0332956	Down
AT3G54970	AT3G54970	AT3G54970	-1.82044	0.01236	-1.36683	0.0441142	Down
AT4G24830	AT4G24830	AT4G24830	-1.48155	0.000310026	-1.36583	0.00141716	Down
AT1G32220	AT1G32220	AT1G32220	-1.25984	0.00250549	-1.36221	0.00252149	Down
AT4G12750	AT4G12750	AT4G12750	-3.19808	0.00428149	-1.35686	0.037234	Down
AT5G06700	AT5G06700	AT5G06700	-2.48725	1.42e-06	-1.35615	0.0186678	Down
AT2G01910	ATMAP65-6	AT2G01910	-2.86042	6.09e-07	-1.34793	0.0368347	Down
AT1G55490	CPN60B	AT1G55490	-3.30296	4.89e-09	-1.34452	0.0493107	Down
AT2G42710	AT2G42710	AT2G42710	-1.30973	0.000798408	-1.33828	0.000778347	Down
AT5G52100	CRR1	AT5G52100	-4.00241	6.28e-11	-1.33797	0.0116136	Down
AT5G55740	CRR21	AT5G55740	-3.43771	3.43e-05	-1.33796	0.0470242	Down
AT1G08910	AT1G08910	AT1G08910	-1.04559	0.0475592	-1.33722	0.00846777	Down
AT4G00340	RLK4	AT4G00340	-1.91891	6.21e-06	-1.32953	0.00169867	Down
AT2G18990	TXND9	AT2G18990	-1.61669	0.00263836	-1.32837	0.0223883	Down
AT5G61300	AT5G61300	AT5G61300	-1.71891	0.00601474	-1.32586	0.0299579	Down
AT2G32560	AT2G32560	AT2G32560	-2.42088	1.34e-06	-1.32087	0.0241037	Down
AT5G02050	AT5G02050	AT5G02050	-1.85992	0.000733308	-1.31601	0.0278052	Down
AT2G17360	AT2G17360	AT2G17360	-1.36059	0.0005736	-1.31052	0.00292955	Down
AT2G01130	AT2G01130	AT2G01130	-1.15084	0.027668	-1.30668	0.0427291	Down
AT3G28760	AT3G28760	AT3G28760	-2.42259	0.000190116	-1.29972	0.014927	Down
AT3G05910	AT3G05910	AT3G05910	-2.37794	2.47e-06	-1.29884	0.0301019	Down
AT5G61570	AT5G61570	AT5G61570	-2.38206	0.000408328	-1.28686	0.0331155	Down
AT3G54470	AT3G54470	AT3G54470	-1.55448	0.000181147	-1.28602	0.00446087	Down
AT4G22730	AT4G22730	AT4G22730	-2.60555	0.000300545	-1.28338	0.0277454	Down
AT3G01510	LSF1	AT3G01510	-1.83479	2.41e-05	-1.28314	0.000117869	Down
AT1G74040	IMS1	AT1G74040	-1.10322	0.0189515	-1.28145	0.00523457	Down
AT2G32640	AT2G32640	AT2G32640	-1.87597	0.00146641	-1.27995	0.0303447	Down
AT3G25500	AFH1	AT3G25500	-2.09838	9.59e-06	-1.27661	0.0190004	Down
AT4G02260	RSH1	AT4G02260	-1.06854	0.000419811	-1.27602	1.66e-05	Down
AT1G04430	AT1G04430	AT1G04430	-2.49848	1.77e-06	-1.27178	0.041385	Down
AT1G55370	NDF5	AT1G55370	-2.64922	3.07e-06	-1.27018	0.0203661	Down
AT2G41770	AT2G41770	AT2G41770	-1.18638	0.00294308	-1.26818	0.00234686	Down
AT3G04550	AT3G04550	AT3G04550	-2.64162	8.48e-08	-1.26496	0.00822477	Down
AT4G31780	MGD1	AT4G31780	-1.31127	0.00354118	-1.26424	0.0106209	Down
AT2G23610	MES3	AT2G23610	-2.12183	5.13e-06	-1.26241	0.0161563	Down
AT3G57180	AT3G57180	AT3G57180	-2.18832	5.01e-05	-1.26018	0.0131139	Down
AT3G01810	AT3G01810	AT3G01810	-2.94968	1.19e-06	-1.25814	0.0346391	Down
AT3G54090	FLN1	AT3G54090	-2.23655	5.4e-05	-1.25801	0.030935	Down
AT5G27290	AT5G27290	AT5G27290	-3.18652	8.74e-07	-1.25605	0.0337094	Down
AT5G45820	CIPK20	AT5G45820	-2.642	1.98e-06	-1.25254	0.0399118	Down
AT5G62840	AT5G62840	AT5G62840	-2.80362	2.59e-08	-1.25005	0.015228	Down
AT5G26742	emb1138	AT5G26742	-1.93877	1.04e-10	-1.24969	0.000172683	Down
AT3G29320	PHS1 AT3G29320	AT3G29320	-2.3277	6.64e-06	-1.24717	0.0291723	Down
AT1G65230	AT1G65230	AT1G65230	-1.89034	4.53e-06	-1.24612	0.00635056	Down
AT4G10030	AT4G10030	AT4G10030	-1.82939	0.00146485	-1.24602	0.0177649	Down
AT3G02630	AT3G02630	AT3G02630	-1.38554	6.05e-06	-1.24208	0.000173139	Down
AT2G21330	FBA1	AT2G21330	-1.96697	1.7e-05	-1.24115	0.0236771	Down
AT5G11880	AT5G11880	AT5G11880	-1.44292	0.000517337	-1.23863	0.00431382	Down
AT3G52960	AT3G52960	AT3G52960	-2.02974	2.58e-05	-1.23823	0.031014	Down
AT4G24750	AT4G24750	AT4G24750	-2.48357	2e-09	-1.2364	0.00796644	Down
AT1G63810	AT1G63810	AT1G63810	-2.95227	0.000412845	-1.23497	0.0444187	Down
AT2G41950	AT2G41950	AT2G41950	-1.68145	0.000593928	-1.22936	0.0165729	Down
AT1G80480	PTAC17	AT1G80480	-1.70705	2.87e-06	-1.22817	0.00030684	Down
AT1G16350	AT1G16350	AT1G16350	-2.54914	7.41e-06	-1.22687	0.0496962	Down
AT3G13180	AT3G13180	AT3G13180	-2.03138	0.000150779	-1.22305	0.0272646	Down
AT3G48420	AT3G48420	AT3G48420	-2.43935	3.88e-07	-1.22017	0.0263287	Down
AT1G60690	AT1G60690	AT1G60690	-1.12129	0.0229424	-1.22009	0.0197638	Down
AT5G01590	AT5G01590	AT5G01590	-1.90117	3.17e-06	-1.21759	0.00637766	Down
AT1G48650	AT1G48650	AT1G48650	-1.71324	3.24e-10	-1.21554	9.46e-07	Down
AT1G55673	AT1G55673	AT1G55673	-1.34276	0.00694778	-1.21522	0.0157055	Down
AT1G24310	AT1G24310	AT1G24310	-1.62167	0.0044711	-1.2137	0.0182608	Down
AT4G38970	FBA2	AT4G38970	-1.92046	1.89e-07	-1.20994	0.00487603	Down
AT3G14390	AT3G14390	AT3G14390	-1.39676	0.00648976	-1.20229	0.0322218	Down
AT3G16060	AT3G16060	AT3G16060	-1.58602	4.73e-06	-1.20208	0.00115992	Down
AT3G25210	AT3G25210	AT3G25210	-1.1873	0.00971798	-1.20111	0.00749383	Down
AT3G24430	HCF101	AT3G24430	-2.21387	1.77e-10	-1.19562	0.000395391	Down
AT5G24300	SS1	AT5G24300	-2.32992	1.86e-12	-1.1928	0.000489822	Down
AT1G09700	HYL1	AT1G09700	-1.05931	0.0170109	-1.18796	0.00384891	Down
AT1G75800	AT1G75800	AT1G75800	-2.27573	1.17e-09	-1.18744	0.001269	Down
AT5G14790	AT5G14790	AT5G14790	-1.46328	0.00341198	-1.18629	0.0279192	Down
ATCG00550	psbJ	ATCG00550	-1.26247	0.000134216	-1.18583	0.001269	Down
AT3G01440	PnsL3	AT3G01440	-3.87016	5.73e-10	-1.18532	0.0483709	Down
AT1G78180	AT1G78180	AT1G78180	-2.5085	9.99e-07	-1.17141	0.00941455	Down
AT4G33010	GLDP1	AT4G33010	-1.62941	0.000309242	-1.1688	0.0292617	Down
AT3G25410	AT3G25410	AT3G25410	-1.65009	3.12e-07	-1.16853	0.00012701	Down
AT5G39960	AT5G39960	AT5G39960	-1.64883	0.0160472	-1.16833	0.0418799	Down
AT5G44370	PHT4;6	AT5G44370	-1.69897	0.0089689	-1.16607	0.0378843	Down
AT3G49240	emb1796	AT3G49240	-2.10361	0.000185399	-1.16479	0.0327698	Down
AT1G50450	AT1G50450	AT1G50450	-1.87445	1.34e-06	-1.16379	0.00114719	Down
AT2G31660	SAD2	AT2G31660	-1.08373	0.00409469	-1.16347	0.00287323	Down
AT3G61870	AT3G61870	AT3G61870	-1.86867	7.92e-06	-1.16264	0.0182024	Down
AT4G26690	SHV3	AT4G26690	-1.16854	0.0183099	-1.16041	0.0399209	Down
AT2G47590	PHR2	AT2G47590	-1.476	7.78e-06	-1.15975	0.00130919	Down
AT3G56430	AT3G56430	AT3G56430	-1.94255	8.1e-05	-1.1591	0.0028745	Down
AT4G39350	CESA2	AT4G39350	-2.6276	3.23e-08	-1.1585	0.0327698	Down
AT1G13030	AT1G13030	AT1G13030	-1.39719	0.0304901	-1.15783	0.042271	Down
AT1G31230	AK-HSDH I	AT1G31230	-1.27621	0.0110326	-1.15639	0.0278675	Down
AT4G00165	AT4G00165	AT4G00165	-2.73982	1.84e-14	-1.14907	0.00361846	Down
AT1G01080	AT1G01080	AT1G01080	-2.17317	6.01e-07	-1.14595	0.0146651	Down
AT4G04435	AT4G04435	AT4G04435	-1.4866	0.00101708	-1.14318	0.0166364	Down
AT5G16810	AT5G16810	AT5G16810	-1.52608	2.38e-05	-1.14051	0.000216167	Down
AT5G58370	AT5G58370	AT5G58370	-1.53692	0.00657121	-1.13894	0.0208429	Down
AT5G63570	GSA1	AT5G63570	-1.29788	0.00019579	-1.1295	0.00360653	Down
AT1G26230	Cpn60beta4	AT1G26230	-3.40565	0.000210309	-1.12783	0.036232	Down
AT5G43750	PnsB5	AT5G43750	-2.0977	6.57e-06	-1.12674	0.0384143	Down
ATCG00570	psbF	ATCG00570	-1.40682	0.00341047	-1.12536	0.045607	Down
AT5G26880	AGL26	AT5G26880	-1.48422	0.00086144	-1.12174	0.0314234	Down
AT3G60360	EDA14	AT3G60360	-1.26634	0.0137676	-1.12102	0.037765	Down
AT3G46740	TOC75-III	AT3G46740	-1.75505	1.23e-05	-1.11981	0.0154011	Down
AT3G63410	APG1	AT3G63410	-1.89567	6.03e-08	-1.11825	0.00585428	Down
AT2G25080	GPX1	AT2G25080	-1.17566	0.00891888	-1.11509	0.0314353	Down
AT3G54790	AT3G54790	AT3G54790	-2.27976	7.81e-05	-1.1135	0.0188076	Down
AT4G39470	AT4G39470	AT4G39470	-1.66725	0.00178025	-1.11327	0.0371618	Down
AT1G07010	SLP1	AT1G07010	-1.02336	0.000135736	-1.11249	7.48e-05	Down
AT4G14300	AT4G14300	AT4G14300	-1.28516	2.1e-05	-1.11138	0.00047451	Down
AT1G30570	HERK2	AT1G30570	-1.2057	0.0295461	-1.11133	0.0469008	Down
AT1G24170	LGT9	AT1G24170	-1.51948	0.00128658	-1.11041	0.0368347	Down
AT5G05170	CEV1	AT5G05170	-1.60162	1.33e-05	-1.10718	0.00939226	Down
AT2G05920	AT2G05920	AT2G05920	-1.96651	2.02e-06	-1.10683	0.0218219	Down
AT4G30950	FAD6	AT4G30950	-2.05613	3.83e-12	-1.10658	0.000929795	Down
AT1G18340	AT1G18340	AT1G18340	-1.09143	0.0156101	-1.10455	0.024322	Down
AT4G21770	AT4G21770	AT4G21770	-1.84684	0.00156574	-1.1012	0.0299975	Down
AT5G44785	OSB3	AT5G44785	-2.02675	4.08e-08	-1.1004	0.000480647	Down
AT5G15440	EDL1	AT5G15440	-1.01425	0.00175972	-1.10024	0.001269	Down
AT2G26910	ABCG32	AT2G26910	-3.05068	5.09e-11	-1.09934	0.0225414	Down
AT1G64680	AT1G64680	AT1G64680	-1.75244	3.95e-07	-1.09455	0.00565089	Down
AT2G36620	RPL24A	AT2G36620	-1.08029	0.021971	-1.09152	0.0435597	Down
AT2G36990	SIGF	AT2G36990	-2.34677	2.33e-10	-1.0899	0.00833281	Down
AT1G58440	XF1	AT1G58440	-1.39735	3.63e-05	-1.08988	0.00242459	Down
AT1G64880	AT1G64880	AT1G64880	-1.58776	0.000203529	-1.08856	0.0130018	Down
AT2G35450	AT2G35450	AT2G35450	-1.44527	0.000226497	-1.08797	0.00504439	Down
AT5G10550	GTE2	AT5G10550	-1.58799	0.000586128	-1.08683	0.0125196	Down
AT1G79990	AT1G79990	AT1G79990	-1.19333	0.00338082	-1.08584	0.0165935	Down
AT3G24040	AT3G24040	AT3G24040	-1.36853	0.000308346	-1.08502	0.00497646	Down
AT4G27490	RRP41L	AT4G27490	-1.83036	0.00233611	-1.08455	0.0402433	Down
AT2G37020	AT2G37020	AT2G37020	-1.07502	0.000900645	-1.08426	0.000515541	Down
AT1G28395	AT1G28395	AT1G28395	-1.37056	0.00354118	-1.08229	0.0293727	Down
AT2G31610	AT2G31610	AT2G31610	-1.25476	0.000826373	-1.08126	0.0117992	Down
AT5G50420	AT5G50420	AT5G50420	-2.37904	4.82e-06	-1.07933	0.0308734	Down
AT2G27680	AT2G27680	AT2G27680	-1.633	3.71e-09	-1.07775	0.000214992	Down
AT4G38890	AT4G38890	AT4G38890	-1.31838	2.91e-05	-1.07658	0.000403276	Down
AT3G12930	AT3G12930	AT3G12930	-1.8391	4.56e-06	-1.07573	0.0169269	Down
AT5G57800	CER3	AT5G57800	-1.6149	7.87e-06	-1.06993	0.00945637	Down
AT1G03440	AT1G03440	AT1G03440	-1.11396	0.00918757	-1.06823	0.0132052	Down
AT1G70760	NdhL	AT1G70760	-2.25977	4.13e-08	-1.06765	0.0293642	Down
AT5G38290	AT5G38290	AT5G38290	-1.01366	0.0117166	-1.0671	0.01555	Down
AT3G15850	FAD5	AT3G15850	-1.87736	2.01e-05	-1.06646	0.0444187	Down
AT4G34830	MRL1	AT4G34830	-2.44653	7.58e-10	-1.06342	0.0138084	Down
AT1G51580	AT1G51580	AT1G51580	-1.8211	0.000632297	-1.05771	0.0103475	Down
AT1G26460	AT1G26460	AT1G26460	-1.12834	0.000594173	-1.05741	0.001269	Down
AT4G18480	CHLI1	AT4G18480	-1.95642	1.34e-06	-1.05144	0.0308734	Down
AT5G43880	TRM21	AT5G43880	-2.40495	1.72e-05	-1.0514	0.0253526	Down
ATCG01090	ndhI	ATCG01090	-2.03069	2.57e-06	-1.05095	0.0471276	Down
AT3G10060	AT3G10060	AT3G10060	-1.69572	3.64e-05	-1.04691	0.0279883	Down
AT1G55900	TIM50	AT1G55900	-1.18907	0.00290715	-1.04508	0.0103475	Down
AT5G42765	AT5G42765	AT5G42765	-1.74572	1.04e-07	-1.04463	0.00197468	Down
AT2G18510	emb2444	AT2G18510	-1.01213	0.000383879	-1.04352	0.000170766	Down
AT1G72600	AT1G72600	AT1G72600	-1.95101	3.18e-05	-1.04094	0.0399209	Down
AT2G29690	ASA2	AT2G29690	-1.6029	0.000544747	-1.04048	0.0271561	Down
AT3G12780	PGK1	AT3G12780	-1.51618	3.1e-07	-1.0398	0.0020563	Down
AT5G36700	PGLP1	AT5G36700	-1.81418	4.94e-06	-1.03164	0.030911	Down
AT1G28350	AT1G28350	AT1G28350	-1.69699	0.000306685	-1.02863	0.0342532	Down
AT5G17710	EMB1241	AT5G17710	-1.42178	0.000554321	-1.02784	0.0346967	Down
AT4G18905	AT4G18905	AT4G18905	-1.12654	0.00641532	-1.02772	0.02077	Down
AT5G51110	AT5G51110	AT5G51110	-1.58129	5.72e-06	-1.02257	0.0122824	Down
AT5G36790	AT5G36790	AT5G36790	-1.81287	5.04e-06	-1.02221	0.0326499	Down
AT4G02630	AT4G02630	AT4G02630	-1.1631	0.00387036	-1.02094	0.0181824	Down
AT4G04640	ATPC1	AT4G04640	-1.67028	6.89e-06	-1.0196	0.0221523	Down
AT1G04200	AT1G04200	AT1G04200	-1.20568	0.0057869	-1.0193	0.0364778	Down
AT1G64980	CDI	AT1G64980	-1.02723	0.00717471	-1.01882	0.0180469	Down
AT4G39620	EMB2453	AT4G39620	-1.36363	0.00450716	-1.01728	0.0482117	Down
AT2G02450	LOV1 AT2G02450	AT2G02450	-1.24968	0.00197948	-1.01671	0.0158587	Down
AT3G20540	POLGAMMA1	AT3G20540	-2.25841	4.39e-08	-1.01289	0.0185022	Down
AT3G63530	BB	AT3G63530	-1.38914	0.0161843	-1.01229	0.0187384	Down
AT4G32880	HB-8	AT4G32880	-1.02439	0.0387913	-1.01031	0.0418849	Down
AT2G25830	AT2G25830	AT2G25830	-1.32395	8.26e-05	-1.01018	0.0045534	Down
AT2G40960	AT2G40960	AT2G40960	-1.49157	0.0012289	-1.00922	0.0477442	Down
AT4G34090	AT4G34090	AT4G34090	-2.62009	1.21e-13	-1.00793	0.00317654	Down
AT3G47470	LHCA4	AT3G47470	-2.59515	7.22e-13	-1.00379	0.0249841	Down
