# Supplementary material for: Nuclear coat protein drives a multifaceted tolerance program during Turnip crinkle virus infection
Source: Research Square preprint supplement (doi:10.21203/rs.3.rs-8695072/v1), 2026-02-12
Supplement: Supplementary file 6 [file 8e590745ab95e39d08f719f3.xlsx]

## Sheet: Description
	Item	Description
Tabs	Shared_TCV_specific_sameDir	All TCV-specific DEGs (minus genotype-associated DEGs) shared between ATG5 and rbohDF, keeping only same-direction genes (Up/Up or Down/Down).
	Welch_vsBaseline_p05_ranked	Subset of shared genes passing Welch’s t-test p<0.05 for BOTH ATG5 vs pooled baseline and rbohDF vs pooled baseline (baseline = Col0+sid2+rbohD+rbohF TCV samples). Ranked: Up by highest RankScore, Down by lowest RankScore.
	gProfiler-KEGG	g:Profiler results from KEGG functional enrichment analyses. rbohD rbohF / atg5-1 shared Up- or Down-regualted genes passing Welch's t test (p<0.05) were used as inputs
Column Descriptions (Tabs 2-3)	User_ID	Gene identifier (Arabidopsis gene ID).
	Direction	Shared direction between ATG5 and rbohDF in DESeq2 (up or down).
	*_log2FC / *_adjPval	DESeq2 TCV vs Col0TCV log2 fold-change and adjusted p-value for ATG5 or rbohDF.
	p_atg5_vs_baseline / p_rbohDF_vs_baseline	Welch’s t-test p-value comparing log2(CPM+1) in ATG5 (or rbohDF) TCV replicates (n=3) vs pooled baseline TCV replicates (n=12).
	mean_*	Mean log2(CPM+1) for each genotype’s TCV replicates (n=3). mean_baseline is the mean across pooled baseline replicates (n=12).
	Z0_*	Baseline-centered Z-score computed across genotype mean log2(CPM+1) values; baseline pool is average of Col0, sid2, rbohD, rbohF. Z0_baseline_pool is set to 0.
	RankScore	Average of Z0_atg5 and Z0_rbohDF; used for sorting within Up or Down groups.

## Sheet: Shared_TCV_specific_sameDir
User_ID	Direction	atg5TCV-Col0TCV_log2FC	atg5TCV-Col0TCV_adjPval	rbohDFTCV-Col0TCV_log2FC	rbohDFTCV-Col0TCV_adjPval
AT5G24080	up	9.8824	9.67e-07	7.92237	8.8e-05
AT5G54050	up	5.73538	0.0109868	11.9053	3.58e-09
AT2G29380	up	6.9422	0.000962412	10.091	3.37e-07
AT2G35300	up	7.55493	3.51e-05	9.42103	9.26e-08
AT4G28088	up	6.9841	0.0271206	7.1268	0.0202404
AT4G06320	up	6.34753	9.97e-05	7.14708	4.51e-06
AT1G04527	up	5.95525	0.000542199	6.35512	0.000116241
AT2G04190	up	6.23888	0.0304901	5.96949	0.0342827
AT2G34610	up	5.17297	7.04e-06	6.54755	3.4e-09
AT4G03295	up	5.07416	0.00313251	6.53553	2.49e-05
AT3G57010	up	4.12973	0.000325195	7.3297	8.08e-12
AT3G57690	up	5.74622	0.0144545	5.5955	0.0145464
AT3G48510	up	4.33769	0.0252529	6.72281	9.89e-05
AT3G02795	up	4.58682	0.012314	6.23798	0.000100264
AT1G05340	up	4.85355	7.8e-06	5.90245	2.1e-08
AT4G37730	up	4.26206	0.0132619	6.44046	5.7e-06
AT2G08585	up	5.45311	0.00157189	5.03094	0.00309184
AT4G16146	up	4.60719	2.99e-07	5.31972	9.37e-10
AT5G02665	up	4.60894	0.017735	5.25707	0.00318351
AT1G29230	up	5.67322	0.000109677	4.17469	0.00569872
AT4G05285	up	4.76814	0.00580358	4.9431	0.00281603
AT3G00985	up	3.42962	0.0495991	6.23161	3.27e-05
AT5G62160	up	4.46437	0.00458344	5.11489	0.000739632
AT1G06667	up	4.25351	0.0391625	5.1438	0.00532169
AT4G32810	up	5.50712	0.0017643	3.86994	0.0305898
AT1G19373	up	4.27475	0.0155919	5.06929	0.00115637
AT4G12580	up	3.13751	0.00679972	6.0852	4.89e-09
AT3G11150	up	4.25514	0.0374058	4.78668	0.013724
AT3G52820	up	4.77869	5.59e-05	4.24797	0.000314934
AT2G23321	up	3.17619	0.0121747	5.69622	9.23e-07
AT1G62370	up	4.76925	2.43e-08	4.0466	1.91e-06
AT3G02725	up	3.21392	0.0481046	5.53927	5.83e-05
AT3G10455	up	4.36471	0.0109522	4.36054	0.00908219
AT5G26010	up	4.8699	0.00457272	3.78871	0.0318173
AT4G25433	up	3.5327	0.00174559	5.05689	1.98e-06
AT4G08775	up	4.60264	0.00368937	3.91437	0.0136513
AT3G55860	up	3.72286	0.0326588	4.79254	0.00265606
AT5G02570	up	3.55919	0.0154393	4.90314	0.000281215
AT4G26365	up	4.47907	0.0126802	3.93482	0.0272596
AT5G00760	up	3.87342	0.0277143	4.51308	0.00606247
AT1G24600	up	4.37204	2.18e-10	3.97263	5.07e-09
AT1G16850	up	2.34757	0.0099363	5.97215	1.19e-13
AT5G42930	up	3.61111	0.0266064	4.62393	0.00177339
AT3G13227	up	3.24828	0.0418044	4.97781	0.000442778
AT3G28007	up	2.97389	0.000983674	5.21871	5.87e-10
AT5G01505	up	3.39395	0.0305409	4.78784	0.000544479
AT3G02895	up	4.63577	0.00683481	3.50889	0.0487315
AT5G06305	up	3.88907	0.0288489	4.24737	0.0100878
AT5G56795	up	5.20293	5.06e-10	2.87701	0.000912574
AT5G40730	up	4.20416	3.57e-11	3.73705	2.58e-09
AT1G54570	up	3.52083	1.37e-08	4.29817	5.71e-13
AT4G07625	up	3.63522	0.0444541	4.13665	0.0119703
AT4G21680	up	4.01666	0.0332085	3.75249	0.0427347
AT3G49210	up	3.97377	6.89e-06	3.76152	1.57e-05
AT1G77120	up	2.41181	0.00130887	5.27372	1.8e-14
AT4G08125	up	4.2207	0.00693503	3.3406	0.0356715
AT4G05100	up	4.18387	8.6e-05	3.35365	0.00170272
AT5G37500	up	3.09128	0.00121679	4.43398	3.23e-07
AT1G03220	up	3.74647	7.68e-07	3.76922	3.98e-07
AT4G12410	up	3.05322	0.0114312	4.44747	5.07e-05
AT5G06775	up	4.16692	0.0127719	3.30094	0.0497857
AT5G07095	up	2.98481	0.00134812	4.47837	8.27e-08
AT4G01930	up	3.00858	0.02297	4.45394	0.000139164
AT4G16680	up	3.06505	0.0072036	4.37172	4.22e-05
AT4G04465	up	2.98815	0.0293333	4.43159	0.000197289
AT2G45570	up	3.37217	0.0498977	4.03995	0.0138953
AT3G03240	up	2.32677	0.0483707	5.08311	5.58e-07
AT3G23240	up	3.50215	0.00696187	3.88023	0.0019452
AT4G16105	up	3.59025	0.0334274	3.78356	0.018931
AT4G02380	up	2.7952	0.00808489	4.54351	4.47e-06
AT3G03480	up	3.62916	2.99e-06	3.65765	1.5e-06
AT2G21780	up	3.01524	0.031503	4.24616	0.000981604
AT2G25940	up	3.61195	0.00616833	3.64673	0.00446848
AT4G25635	up	2.95353	0.0378374	4.3012	0.00112305
AT5G15533	up	2.90228	0.0107481	4.25257	2.82e-05
AT5G50660	up	3.45616	0.00420976	3.63285	0.00187849
AT5G50560	up	3.45616	0.00420976	3.63285	0.00187849
AT3G04155	up	3.40328	0.0326554	3.67833	0.0134645
AT5G02020	up	2.46886	0.00721025	4.59175	7.51e-08
AT1G12013	up	3.16099	0.00229206	3.83441	6.34e-05
AT4G11911	up	2.89132	0.00479928	4.09657	2.15e-05
AT4G19230	up	2.73324	0.00069728	4.24646	1.35e-08
AT1G09867	up	2.55143	0.0017526	4.37702	1.04e-09
AT4G32780	up	2.99149	0.0199775	3.91389	0.000830834
AT5G14180	up	3.38422	0.0201354	3.48339	0.0138187
AT1G19200	up	3.45142	1.02e-05	3.34323	1.39e-05
AT1G70910	up	2.98413	0.00962625	3.71459	0.000502726
AT3G02435	up	3.39921	0.00383113	3.27116	0.00401992
AT4G18990	up	2.91805	0.0069139	3.7212	0.000286747
AT5G46295	up	3.09047	0.0110219	3.54081	0.00233843
AT5G23950	up	4.42834	5.58e-18	2.10429	0.000232046
AT3G04775	up	2.71046	0.0182173	3.73344	0.000277991
AT3G14060	up	4.20286	5.79e-06	2.20596	0.0223264
AT2G38400	up	2.86991	3.99e-05	3.50207	2.01e-07
AT5G07680	up	3.40202	0.000566212	2.95154	0.00260168
AT5G67310	up	3.03729	0.0189051	3.29304	0.00843502
AT5G24600	up	2.53888	0.0057617	3.78198	4.63e-06
AT4G31875	up	3.81681	1.61e-06	2.48923	0.00261841
AT1G52565	up	3.41436	0.000148668	2.88486	0.00129208
AT1G02470	up	3.73286	1.11e-08	2.55352	0.000111986
AT3G48180	up	3.53307	1.07e-05	2.72771	0.000739632
AT3G09480	up	1.94617	0.0455242	4.30061	7.17e-07
AT3G57980	up	2.64428	0.0254278	3.59421	0.000597521
AT3G53650	up	3.15357	1.35e-05	3.06872	1.6e-05
AT4G39110	up	2.69852	0.0449713	3.48014	0.00553517
AT4G19810	up	2.64426	0.0483659	3.53206	0.00511378
AT1G30800	up	3.01111	0.0428795	3.16021	0.0237311
AT1G68795	up	3.04678	4.92e-06	3.12126	1.63e-06
AT5G04250	up	2.48409	0.00222002	3.64114	1.46e-06
AT2G36950	up	2.6497	2.49e-06	3.45562	1.65e-10
AT3G44300	up	3.56671	0.00261949	2.53753	0.0345383
AT5G06230	up	3.05787	0.0140029	3.04331	0.0121624
AT1G52890	up	3.01751	0.003783	3.07013	0.00255749
AT3G06900	up	3.71964	0.000279085	2.33081	0.0348069
AT2G01610	up	3.24922	3.89e-05	2.78504	0.000397496
AT4G04972	up	3.36065	0.0096847	2.66121	0.0412797
AT1G77145	up	3.01434	2.87e-06	2.9937	2.03e-06
AT2G33380	up	3.65261	1.59e-10	2.32969	5.5e-05
AT2G27180	up	3.24038	2.44e-05	2.72819	0.000372397
AT5G04340	up	3.18876	0.000565112	2.76322	0.00262784
AT4G11543	up	2.46756	0.0302166	3.43235	0.00087579
AT5G61800	up	1.79876	0.048597	4.04671	4.45e-07
AT3G55890	up	3.525	0.000761025	2.31659	0.0306801
AT5G64570	up	2.71349	0.000664775	3.12373	5.2e-05
AT3G03430	up	2.77834	0.0100942	3.03573	0.00276152
AT3G25290	up	3.16628	6.17e-07	2.6474	2.74e-05
AT5G39610	up	2.93586	0.0152775	2.84877	0.0162005
AT1G09883	up	2.25026	0.0115941	3.51497	6.71e-06
AT2G16890	up	2.42627	0.000609336	3.30452	3.42e-07
AT2G29370	up	2.37748	0.0183099	3.33289	0.00033498
AT4G39361	up	2.4038	0.0324904	3.29781	0.000958101
AT2G01021	up	2.73899	0.000459149	2.93369	0.000112522
AT1G61800	up	1.99762	0.0330692	3.63338	2.57e-05
AT1G32450	up	3.59788	3.51e-06	2.01041	0.0123439
AT4G40070	up	2.62922	0.00360605	2.95066	0.000420274
AT5G20940	up	3.00186	0.00263836	2.57109	0.00958029
AT5G02645	up	2.59204	0.0185596	2.97986	0.00342347
AT4G39270	up	2.45683	0.0102621	3.08618	0.000663668
AT3G05880	up	1.91754	0.00105199	3.60583	4.24e-11
AT3G57380	up	2.58174	0.0138558	2.93652	0.00344412
AT5G02055	up	2.46957	0.0184239	3.04336	0.00143852
AT3G02095	up	2.34436	0.0409174	3.16327	0.00291528
AT3G27330	up	2.48013	0.00276428	3.00372	0.000138193
AT5G56980	up	3.8875	6.16e-08	1.58472	0.0382508
AT4G16600	up	2.92852	0.0116951	2.54089	0.026733
AT5G08445	up	2.41003	0.0175631	3.055	0.00105094
AT1G07590	up	3.70658	9.39e-07	1.74203	0.0278807
AT5G20830	up	2.77718	3.52e-07	2.63119	9.27e-07
AT4G24130	up	3.07256	4.68e-05	2.32159	0.00236224
AT4G00305	up	3.06598	0.000106123	2.32394	0.00385973
AT5G60470	up	3.08171	0.002659	2.29307	0.0296413
AT3G11600	up	2.21527	0.0006797	3.14841	2.86e-07
AT3G55910	up	2.99003	0.000471753	2.36503	0.00596991
AT4G31240	up	2.48283	8.31e-05	2.83556	3.27e-06
AT2G40435	up	2.9512	4.98e-06	2.3648	0.00025838
AT5G64310	up	1.95351	0.0416196	3.35593	0.000152601
AT4G39670	up	2.64463	0.0335398	2.66148	0.0279394
AT4G26470	up	2.82184	0.00142982	2.46202	0.00505989
AT3G03460	up	1.86427	0.0124327	3.40834	6.16e-07
AT2G01890	up	3.18074	2.31e-06	2.08696	0.00230872
AT5G47590	up	3.14343	3.6e-05	2.09499	0.00707538
ATMG00640	up	2.26129	0.0113113	2.96506	0.000448274
AT5G43380	up	1.70161	0.013709	3.51597	8.73e-09
AT4G37320	up	1.75101	0.00048814	3.45382	1.56e-14
AT3G02445	up	2.1707	0.046691	2.91994	0.00227889
AT1G10530	up	2.2606	0.0138337	2.82917	0.000885674
AT1G74020	up	2.50105	1.92e-05	2.56644	7.5e-06
AT5G54840	up	2.18031	0.000127247	2.86115	1.59e-07
AT1G62570	up	2.83901	6.84e-07	2.19906	0.000127746
AT4G37430	up	2.9612	1.48e-05	2.05524	0.00305173
AT3G61450	up	2.13581	0.0162136	2.84464	0.000615653
AT2G33385	up	2.71814	0.00242536	2.2439	0.0123351
AT1G09773	up	2.78795	0.00772375	2.14562	0.0428864
AT3G62590	up	2.72437	0.000235314	2.20629	0.00289582
AT3G02410	up	2.09589	0.0195619	2.83006	0.000600378
AT3G51750	up	2.11278	0.000266782	2.80516	3.95e-07
AT5G57910	up	2.84589	2.1e-08	2.05721	5.82e-05
AT2G07715	up	2.07587	0.00392343	2.82434	7.48e-06
AT3G60961	up	2.67648	0.000228502	2.22275	0.00215991
AT4G17215	up	2.33092	0.0115778	2.55987	0.00385924
AT5G16360	up	2.89185	2.67e-05	1.97253	0.00496065
AT3G50390	up	2.384	0.0394461	2.47719	0.0239819
AT1G55365	up	2.08811	0.0470222	2.75418	0.00487287
AT3G12510	up	2.05386	0.0019517	2.78823	9.05e-06
AT4G27410	up	2.22944	0.0305004	2.59654	0.00863758
AT2G07727	up	1.99913	0.000937538	2.79285	8.42e-07
AT2G30480	up	1.40093	0.0443941	3.38734	1.72e-08
AT5G10625	up	2.19725	0.0313375	2.58579	0.00810763
AT5G59845	up	2.76867	0.000908321	2.01387	0.0182038
AT3G16900	up	2.47037	0.000739348	2.31099	0.0012193
AT2G41450	up	1.88431	0.0174298	2.8837	5.15e-05
AT2G24545	up	2.48164	5.99e-05	2.26548	0.000210883
AT5G15853	up	2.77203	0.00169863	1.95104	0.0307802
AT3G29000	up	2.36781	0.0466432	2.34703	0.0428841
AT2G45040	up	2.35791	0.0420951	2.35383	0.0334869
AT3G47950	up	2.58934	0.000478415	2.08186	0.0051436
AT1G74010	up	2.19455	0.00519648	2.47452	0.00105669
AT5G65207	up	2.41754	0.00110469	2.23824	0.00221281
AT4G06410	up	2.22252	0.00115291	2.4265	0.000228131
AT5G11090	up	2.24064	0.000404289	2.39886	0.000102678
AT3G07960	up	2.04303	0.0411773	2.59214	0.00361179
AT3G26840	up	2.54788	0.000359862	2.08023	0.00354499
AT5G25770	up	2.28558	5e-05	2.33755	2.23e-05
AT5G13880	up	1.63313	0.00888481	2.98976	3.34e-08
ATMG00560	up	1.86973	0.0255513	2.73838	0.000109887
AT1G13740	up	2.38698	0.000207548	2.21505	0.00047304
AT2G19450	up	1.46768	0.0306704	3.13032	1.5e-07
AT2G07725	up	2.08471	0.000634773	2.49631	9.22e-06
AT1G28190	up	2.4486	0.0164272	2.11043	0.036803
AT5G13750	up	1.77646	6e-05	2.77225	2.86e-11
AT5G13330	up	2.2494	0.0372814	2.27458	0.0302989
AT4G36620	up	2.28849	0.00201163	2.23364	0.00190064
AT2G26310	up	2.18656	0.00738642	2.32685	0.00282378
AT4G16690	up	2.45498	1.59e-06	2.02434	7.09e-05
AT3G12830	up	3.01827	5.04e-06	1.45091	0.0374167
AT5G65110	up	2.34085	0.00442858	2.10572	0.00960923
AT3G19660	up	2.48086	2.28e-06	1.95224	0.00020342
AT4G22270	up	1.76147	0.000358044	2.64734	2.31e-09
AT2G18780	up	2.06282	3.52e-05	2.33018	7.7e-07
AT4G13030	up	2.16542	0.00106821	2.21927	0.000586027
AT2G28110	up	2.28601	0.00518286	2.09824	0.00921927
AT4G15563	up	2.13003	0.0240951	2.20384	0.0139442
AT2G08905	up	1.5946	0.0477617	2.72027	4.07e-05
AT3G51740	up	2.08244	0.0092973	2.21951	0.0037109
AT3G11773	up	1.99492	0.0367715	2.30556	0.00986802
AT5G39090	up	2.11507	0.00196907	2.15285	0.00117938
AT1G15110	up	2.04418	5.42e-05	2.21934	5.98e-06
AT1G32385	up	2.24749	0.00442858	2.00982	0.0091211
AT1G15900	up	2.21382	0.00465795	2.04131	0.00747749
AT2G34340	up	2.18955	0.000810676	2.03471	0.0013325
AT1G20120	up	1.93197	0.00689609	2.25886	0.000961096
AT3G15760	up	2.28872	0.00554179	1.8963	0.0211419
AT1G19180	up	2.15096	0.0255223	2.02968	0.0314565
AT2G48090	up	2.17891	0.00141228	1.99492	0.00264696
AT5G48180	up	2.22654	6.72e-08	1.90202	3.31e-06
AT3G58710	up	1.56459	0.00317948	2.55374	4.97e-08
AT1G72800	up	1.73588	0.00786153	2.3728	0.000116132
AT3G53730	up	1.5789	0.000627231	2.52532	6.78e-09
AT5G13870	up	1.48281	0.00782557	2.60985	1.29e-07
AT2G07687	up	1.75045	0.0124327	2.33251	0.000312369
AT1G03620	up	2.46195	0.00146854	1.5866	0.0480041
AT3G45638	up	2.28231	0.00161637	1.74867	0.0167667
AT3G21700	up	1.98343	0.000116243	2.04529	4.56e-05
AT4G39364	up	1.51155	0.00763684	2.50111	1.4e-07
AT2G31990	up	2.10388	0.000774665	1.90157	0.00198553
AT3G01650	up	1.47246	0.0350979	2.52666	8.19e-05
AT2G23790	up	1.96979	2.88e-07	2.01741	6.36e-08
AT4G15120	up	2.00013	0.00328552	1.98341	0.00232541
AT4G00200	up	2.37094	3.16e-06	1.6024	0.00212791
AT5G67160	up	1.977	0.000203999	1.98581	0.000126085
AT3G23170	up	2.53589	2e-05	1.39414	0.0241623
AT1G62045	up	1.4261	0.0198557	2.49161	2.8e-06
AT1G22890	up	2.07695	0.0070065	1.83638	0.016054
AT1G01570	up	1.61871	0.0253552	2.29289	0.000319766
AT5G10946	up	2.13278	0.00116213	1.74361	0.00790063
AT5G54470	up	2.48344	2.51e-07	1.38722	0.00559211
AT1G04247	up	1.64273	0.0456716	2.22466	0.00359543
AT1G74740	up	1.61714	0.000176336	2.23949	1.74e-08
AT1G07150	up	2.0411	0.0110574	1.80838	0.0223335
AT1G61275	up	2.44923	1.73e-05	1.39008	0.0232156
ATMG00210	up	1.92086	0.0163438	1.89952	0.0111997
AT5G14700	up	1.76652	0.000405973	2.03968	2.2e-05
AT5G57060	up	1.44873	5.72e-05	2.34938	2.57e-12
AT4G20260	up	2.52474	4.62e-08	1.26528	0.0083339
AT2G22790	up	1.93972	0.00694184	1.84188	0.00851019
AT1G27300	up	1.63907	0.00421969	2.13091	9.64e-05
AT1G04277	up	1.89801	0.0246499	1.86441	0.0179208
AT5G60430	up	1.24828	0.0442509	2.50776	5.1e-06
AT1G15405	up	2.20089	0.000676302	1.54595	0.0192728
AT5G17450	up	1.42554	0.00689609	2.32101	1.26e-06
AT3G55560	up	1.66439	0.00616833	2.07346	0.00034779
ATMG00160	up	2.04921	0.00328864	1.6741	0.0159464
AT3G04165	up	1.77894	0.0293495	1.92792	0.0109665
AT1G02816	up	2.44537	1.87e-10	1.25461	0.00158968
AT3G57020	up	1.7308	0.000251735	1.95271	2.08e-05
AT1G78310	up	1.80116	0.000122962	1.86818	4e-05
AT4G22780	up	1.63914	0.0190862	2.02802	0.00227069
AT5G43620	up	1.86814	0.00556175	1.79788	0.0063047
AT4G35500	up	1.46889	0.00265736	2.1971	8.49e-07
AT3G51090	up	2.38607	1.75e-08	1.2776	0.00416735
AT2G18950	up	2.06173	1.75e-08	1.57354	1.7e-05
AT1G54290	up	2.02612	2.57e-07	1.59909	4.58e-05
AT5G46180	up	1.93256	1.7e-05	1.68322	0.000158726
AT5G43780	up	1.88097	0.0152086	1.72798	0.0234643
AT4G22760	up	2.05985	0.00154354	1.54518	0.0189864
AT2G46620	up	1.59679	0.0431746	1.99295	0.00781927
AT1G05163	up	2.12126	0.0009363	1.46625	0.0251106
AT5G09800	up	2.10649	0.0036318	1.46824	0.0472907
AT2G30362	up	1.71504	0.0382752	1.85828	0.0139486
AT3G54950	up	1.83744	2.6e-05	1.71054	6.65e-05
AT3G22750	up	2.13834	1.9e-05	1.4047	0.00612879
AT5G01910	up	1.35781	0.0423971	2.18318	0.000233326
AT2G41505	up	1.87173	0.0106328	1.66511	0.019686
AT1G15230	up	1.43938	0.0138733	2.0929	0.000139163
AT3G03870	up	1.83367	0.0237453	1.69274	0.0335677
AT4G18800	up	2.2141	2.94e-13	1.31208	2.4e-05
AT3G05200	up	1.64284	0.0361676	1.87249	0.0129035
AT3G12070	up	1.5206	0.0175181	1.99199	0.000560643
AT2G01010	up	1.61807	0.00106178	1.89067	7.69e-05
AT2G45023	up	1.83303	7.29e-06	1.67363	2.73e-05
AT2G25680	up	2.15885	1.09e-05	1.34595	0.00807993
AT3G44880	up	1.72459	7.95e-06	1.7761	2.61e-06
AT1G76760	up	1.68163	0.00136301	1.79361	0.000338407
AT1G50630	up	1.31468	0.000319932	2.15381	2.73e-11
AT4G36630	up	1.12385	0.0172423	2.34021	5.04e-08
AT2G24040	up	2.39785	4.47e-13	1.05689	0.00249127
AT5G41800	up	1.52494	0.00010456	1.92588	1.71e-07
AT2G39250	up	1.34786	0.0369776	2.08573	0.000479555
AT5G44210	up	1.76548	0.0299752	1.66681	0.0342183
AT1G22403	up	1.69668	2.17e-06	1.73241	5.58e-07
AT4G20930	up	2.04976	2.56e-05	1.37495	0.0058302
AT4G17483	up	2.02084	0.0018306	1.40206	0.0355472
AT1G22190	up	1.93917	0.000321183	1.47494	0.00654927
AT5G53920	up	2.01874	0.000463998	1.38663	0.0195497
AT1G20630	up	1.41462	0.00712782	1.9835	6.54e-05
AT2G46790	up	1.6178	1.24e-07	1.77942	1.8e-09
AT4G32250	up	1.94224	7.32e-06	1.45297	0.000856459
AT2G28200	up	1.93595	1.31e-06	1.45922	0.000283085
AT3G51970	up	1.6544	0.0019545	1.72677	0.000697388
AT3G47360	up	1.45844	0.00182679	1.92056	5.73e-06
AT5G47430	up	1.36559	2.82e-05	2.01323	7.84e-11
AT4G30470	up	1.50061	0.00369173	1.86549	0.000159822
AT1G34630	up	1.11469	0.00979254	2.18922	5.68e-09
AT3G41768	up	1.51172	0.00225955	1.77095	0.000213886
AT5G06190	up	1.66288	0.000128122	1.61941	0.000135603
AT5G47560	up	1.74286	0.0115778	1.53845	0.0242589
AT3G61060	up	1.62426	0.028288	1.65061	0.0219576
AT4G15260	up	1.28875	0.0360155	1.9671	0.00060044
AT2G23150	up	1.53954	0.000605599	1.69888	8e-05
AT3G50650	up	1.61553	0.00512029	1.62073	0.00372624
AT1G03080	up	1.24534	0.000380791	1.99003	1.14e-09
AT5G16450	up	1.91966	6.86e-09	1.31242	9.03e-05
AT4G16110	up	1.87996	2.13e-06	1.34177	0.000823162
AT5G64560	up	1.10276	0.000492155	2.11103	2.69e-15
AT4G36640	up	1.39115	0.000193574	1.81677	3.78e-07
AT5G27520	up	1.71473	0.00747093	1.48565	0.0194935
AT3G03550	up	1.68647	2.4e-05	1.51379	0.000105104
AT2G41082	up	1.41376	0.0203569	1.78135	0.000952572
AT4G39090	up	1.43555	0.0037512	1.74669	0.000245177
AT1G56145	up	1.6912	0.00488646	1.48097	0.0125888
AT2G33150	up	1.90491	4.37e-08	1.25562	0.000362169
AT3G51895	up	1.47348	0.00121393	1.68335	0.000131923
AT4G27780	up	1.27235	0.00174795	1.88344	7.53e-07
AT5G17280	up	2.06814	1.49e-21	1.08764	1.32e-06
AT5G54730	up	1.74142	0.000366506	1.41058	0.00385973
AT3G60180	up	1.48258	0.00605595	1.66932	0.00130492
AT3G22942	up	1.65391	7.24e-05	1.49657	0.00025964
AT1G47128	up	1.81167	4.62e-05	1.33384	0.00294924
AT5G65870	up	1.42901	0.0394201	1.69871	0.0103839
AT5G58380	up	1.05933	0.00838559	2.06731	1.11e-08
AT2G37510	up	1.19757	0.0461275	1.92872	0.000322693
AT3G03450	up	1.56249	0.00168895	1.56073	0.00118825
AT3G59690	up	1.04647	0.0366504	2.07667	7.67e-07
AT5G29000	up	1.35065	0.0013503	1.76776	7.65e-06
AT2G37150	up	1.23603	0.0342293	1.87885	0.00046386
AT3G57450	up	1.67553	0.0149928	1.43377	0.0357121
AT2G22560	up	1.35696	0.00521391	1.75215	7.26e-05
AT5G54640	up	1.29149	0.00813347	1.81468	8.39e-05
AT1G25275	up	1.77431	4.43e-05	1.31679	0.00264268
AT4G32070	up	1.75878	2.57e-06	1.33007	0.000396283
AT5G46720	up	1.71024	9.43e-08	1.35797	1.59e-05
AT1G53030	up	1.73259	4.67e-07	1.32547	0.000116643
AT1G29195	up	1.90856	0.000106972	1.14728	0.0259942
AT3G17770	up	1.37485	0.00364873	1.6777	0.0002096
AT5G13800	up	1.88622	2.69e-06	1.16594	0.00459671
AT5G22850	up	1.71437	6.27e-07	1.33126	0.000106931
AT2G16700	up	1.68779	7.47e-05	1.33895	0.00171601
AT5G28300	up	1.0418	0.0173955	1.98419	5.12e-07
AT4G21215	up	1.58096	7.92e-05	1.43208	0.000298285
AT1G04780	up	1.25855	0.000347634	1.75291	1.22e-07
AT4G19645	up	1.52947	0.0282421	1.46446	0.0310426
AT1G70780	up	1.73943	4.02e-06	1.24522	0.00106675
AT5G52510	up	1.42236	1.64e-07	1.55788	2.31e-09
AT1G22930	up	1.78406	0.00105199	1.1956	0.0311223
AT1G06570	up	1.76627	1.43e-06	1.20748	0.0011367
AT5G15260	up	1.5001	9.43e-05	1.4725	8.92e-05
AT1G13960	up	1.20569	0.00165424	1.74873	9.36e-07
AT1G01780	up	1.51428	0.000298791	1.41454	0.000525752
AT4G35070	up	1.49637	0.0205489	1.41999	0.0235148
AT5G45100	up	1.47636	0.000392447	1.43281	0.000456612
AT3G47347	up	1.20342	0.0407164	1.7033	0.000823649
AT1G21920	up	1.80693	0.000405798	1.09683	0.0371735
AT3G17630	up	1.30141	0.0102717	1.60063	0.000574378
AT1G55280	up	1.46914	0.00448812	1.43153	0.00426269
AT5G54240	up	1.61173	0.00600723	1.26738	0.0299271
AT5G26731	up	1.61246	0.00209849	1.26577	0.0159175
AT3G51960	up	1.42396	0.00174559	1.42871	0.00125296
AT1G80300	up	1.37197	4.23e-06	1.47628	3.78e-07
AT4G01610	up	1.58147	0.00625979	1.25448	0.0301231
AT5G57080	up	1.19941	0.0477617	1.6307	0.00244324
AT5G05380	up	1.26268	0.0031138	1.55714	4.65e-05
AT1G55080	up	1.55079	2.92e-06	1.26829	0.000106168
AT5G25130	up	1.3231	0.0486013	1.49	0.0204733
AT5G16680	up	1.01944	0.0154401	1.79179	2.52e-06
AT4G30490	up	1.54208	0.00373751	1.24286	0.0193845
AT5G16910	up	1.31364	0.00734758	1.46202	0.00195599
AT1G03340	up	1.52399	0.0045346	1.23478	0.0209288
AT1G30475	up	1.67153	0.000656471	1.08668	0.0308518
AT1G14330	up	1.60585	0.00183519	1.15072	0.0273928
AT1G03290	up	1.57364	0.00377588	1.18221	0.0305544
AT1G78420	up	1.18084	0.0141991	1.5726	0.000524858
AT4G33090	up	1.15105	5.17e-06	1.60226	2.43e-11
AT1G73390	up	1.73628	7.57e-05	1.01177	0.0258025
AT3G14270	up	1.23316	0.000847168	1.51375	1.61e-05
AT5G47860	up	1.50197	0.002389	1.24361	0.0116173
AT5G01720	up	1.20962	0.0422364	1.53074	0.0066855
AT5G66760	up	1.00268	2.54e-05	1.72749	9.9e-15
AT1G21410	up	1.40218	0.00223885	1.32235	0.00335506
AT4G26055	up	1.39214	0.0182125	1.32874	0.0196462
AT1G48040	up	1.08272	0.00503492	1.63202	3.66e-06
AT2G21060	up	1.43657	0.0114986	1.2686	0.0235328
AT1G68550	up	1.16582	0.031144	1.53744	0.00246088
AT5G42050	up	1.29918	0.0362492	1.40071	0.019536
AT1G32630	up	1.24135	0.001078	1.45652	3.24e-05
AT5G03905	up	1.61015	4.02e-07	1.08584	0.000748541
AT1G27760	up	1.29957	0.0012289	1.39108	0.000373283
AT2G27990	up	1.32626	0.0267169	1.36203	0.0140841
AT5G65240	up	1.09109	0.00902742	1.58001	2.56e-05
AT1G44170	up	1.55016	2.64e-07	1.11713	0.000226994
AT4G20300	up	1.28449	1.12e-08	1.37816	1.64e-10
AT3G53720	up	1.40713	0.0226949	1.25448	0.0386083
AT4G14790	up	1.24001	0.00479798	1.4106	0.000534352
AT3G14610	up	1.19415	0.0462472	1.45059	0.00965627
AT3G49725	up	1.00538	0.0194507	1.63871	5.41e-06
AT4G36720	up	1.587	1.2e-07	1.05368	0.000527958
AT5G08170	up	1.14012	5.42e-05	1.49022	1.91e-08
AT4G25670	up	1.37736	0.00166645	1.25244	0.00380777
AT5G06750	up	1.09289	0.0406973	1.53505	0.00202731
AT1G11910	up	1.28604	4.08e-05	1.34038	1.26e-05
AT1G75170	up	1.47684	0.00439375	1.14846	0.0271513
AT1G76390	up	1.47209	0.0019501	1.15054	0.015621
AT1G51340	up	1.42525	0.00113201	1.19704	0.00583954
AT1G09687	up	1.19017	0.00655195	1.43195	0.000426689
AT2G31390	up	1.484	3.95e-07	1.13507	0.000104619
AT4G01710	up	1.2972	1.02e-05	1.28979	6.31e-06
AT1G01770	up	1.11043	0.0343859	1.47263	0.00193501
AT1G03960	up	1.0247	0.0447316	1.55379	0.000320434
AT5G43740	up	1.03279	0.00626717	1.54556	8.94e-06
AT5G49665	up	1.42575	0.0143519	1.15121	0.0474457
AT1G12060	up	1.32037	0.00701653	1.25552	0.00691341
AT1G13390	up	1.24061	0.0208671	1.33483	0.00998192
AT3G26920	up	1.04433	0.00450911	1.52778	4.21e-06
AT4G12000	up	1.39835	0.00136031	1.17029	0.00699292
AT2G31560	up	1.1937	0.00107167	1.37404	9.27e-05
AT4G12040	up	1.41503	9.4e-07	1.14887	6.36e-05
AT1G04280	up	1.37951	0.0130948	1.17491	0.0328261
AT3G12030	up	1.35631	2.66e-08	1.18644	7.34e-07
AT4G10040	up	1.15684	8.85e-05	1.37959	1.32e-06
AT2G24260	up	1.16061	0.00336885	1.3719	0.000142276
AT5G52545	up	1.20175	0.00872609	1.3121	0.00243029
AT3G47833	up	1.22259	2.68e-06	1.2834	4.13e-07
AT4G19860	up	1.35066	0.0077317	1.1533	0.0219832
AT5G39590	up	1.34397	0.000136537	1.15721	0.000934438
AT2G14115	up	1.31766	0.000268027	1.17885	0.000715754
AT5G50100	up	1.48784	4.71e-05	1.00577	0.00690007
AT5G18610	up	1.31265	0.0206084	1.17972	0.0311367
AT5G09595	up	1.03249	0.0434086	1.45033	0.00110446
AT5G17380	up	1.23812	0.000842707	1.23344	0.000680028
AT3G06810	up	1.42607	0.000200866	1.03673	0.0074345
AT3G05932	up	1.06637	0.00180259	1.38538	1.49e-05
AT2G37520	up	1.00619	0.00276404	1.43643	4.06e-06
AT1G12400	up	1.43854	7.41e-06	1.00128	0.00206306
AT4G15953	up	1.31117	0.0150882	1.12818	0.0283044
AT1G24800	up	1.2658	0.000374607	1.16681	0.000634028
AT2G24540	up	1.19957	0.00249753	1.22924	0.00136974
AT4G39140	up	1.02862	0.0158652	1.39139	0.000518618
AT1G04960	up	1.31513	0.000158497	1.10278	0.00140102
AT2G08860	up	1.17272	0.0364835	1.2238	0.0188309
AT2G01460	up	1.1982	0.00195093	1.19307	0.00116024
AT5G52200	up	1.2832	2.5e-06	1.10426	4.05e-05
AT2G41000	up	1.33609	1.5e-05	1.03011	0.000822013
AT2G14110	up	1.27776	0.000310176	1.08327	0.00180032
AT1G25150	up	1.16953	0.0015052	1.19109	0.000620112
AT1G78380	up	1.11278	0.0208891	1.22736	0.00834319
AT1G51700	up	1.15593	0.0179648	1.17901	0.0130702
AT1G67880	up	1.19928	0.00420474	1.13061	0.00571565
AT3G46440	up	1.01719	0.00616914	1.31032	0.000195703
AT5G27150	up	1.28688	0.000127955	1.04009	0.0019452
AT5G61530	up	1.12741	0.0257345	1.19803	0.0141271
AT2G30945	up	1.0311	0.0145051	1.29316	0.000811576
AT1G24881	up	1.24328	0.000348771	1.06984	0.0014762
AT3G57390	up	1.28242	0.00117082	1.02688	0.00902063
AT1G25055	up	1.24328	0.000342537	1.05569	0.00173045
AT5G47050	up	1.235	0.0211336	1.06146	0.0453298
AT4G16670	up	1.05997	0.00974873	1.23613	0.00155824
AT3G53120	up	1.20517	0.00210078	1.08121	0.00502467
AT1G45976	up	1.15046	9.55e-05	1.13209	8.18e-05
AT5G43730	up	1.06039	0.0196327	1.22005	0.0032267
AT3G07020	up	1.15342	1.1e-05	1.12522	8.64e-06
AT5G21990	up	1.23452	4e-07	1.04311	1.41e-05
AT4G11220	up	1.01421	0.000559945	1.24929	9.46e-06
AT2G45500	up	1.23501	0.00606142	1.01886	0.022617
AT5G44790	up	1.24483	4.71e-05	1.00802	0.000952593
AT3G03320	up	1.10606	0.0265758	1.14157	0.0161948
AT3G10860	up	1.1348	8.52e-08	1.1121	8.53e-08
AT1G29330	up	1.21429	0.014286	1.01421	0.039296
AT1G25520	up	1.18412	0.00165549	1.04313	0.00512342
AT2G39725	up	1.15826	0.00162846	1.0601	0.00309184
AT5G56190	up	1.10339	0.00140657	1.10678	0.000974981
AT4G12610	up	1.01557	0.0218301	1.17873	0.00523599
AT4G33690	up	1.09984	0.00283862	1.09382	0.00197531
AT1G08570	up	1.13437	0.00977402	1.05502	0.0146343
AT3G27380	up	1.14362	6.16e-08	1.03694	5.92e-07
AT1G09794	up	1.00667	0.0115296	1.16088	0.00168798
AT1G08770	up	1.14665	1.91e-05	1.01958	0.000113353
AT4G19950	up	1.01618	0.0175605	1.1498	0.00397961
AT3G05830	up	1.14045	0.0231551	1.0112	0.0398502
AT4G24220	up	1.05868	0.00314661	1.08931	0.00183382
AT5G01820	up	1.07488	0.0413675	1.07167	0.0365785
AT1G55475	up	1.12509	0.00165011	1.01338	0.00329863
AT3G61560	up	1.06834	5.54e-05	1.06615	2.42e-05
AT4G37310	up	1.11767	0.01969	1.00669	0.0327915
ATMG00580	up	1.00716	0.00975955	1.11235	0.00309184
AT5G17580	up	1.04787	0.0186338	1.06576	0.0104059
AT5G25900	up	1.04951	0.00972846	1.03318	0.00858396
AT1G48790	up	1.02422	1.09e-05	1.05826	1.91e-06
AT1G44820	up	1.0104	0.00490571	1.05195	0.00241585
AT5G64930	up	1.00853	0.00154259	1.01436	0.000985304
AT4G30240	up	1.00703	0.00205236	1.00136	0.00145955
AT2G26020	down	-8.39227	5.89e-05	-8.85412	1.5e-05
AT5G44420	down	-6.9929	0.00055005	-7.45076	0.000156535
AT4G11320	down	-7.21291	1.79e-05	-7.06935	2.56e-06
AT1G78450	down	-5.95739	2.41e-05	-8.26812	4.47e-08
AT2G40610	down	-6.13023	7.06e-06	-7.97408	1.19e-07
AT5G44430	down	-7.19321	0.00563892	-6.69327	0.00891255
AT5G15580	down	-6.56923	0.000197844	-7.03109	4.48e-05
AT5G13140	down	-4.77056	4.83e-07	-8.40997	2.54e-09
AT3G03850	down	-6.23582	0.000102038	-6.69768	1.94e-05
AT3G12710	down	-5.52005	0.00344485	-6.9437	0.000125699
AT4G31890	down	-5.73322	0.000454202	-6.19508	0.000101285
AT1G29440	down	-6.14966	1.12e-05	-5.68162	3.48e-07
AT1G52190	down	-4.24421	3.66e-07	-7.57966	2.02e-12
AT1G31710	down	-5.65899	0.00064017	-6.12085	0.000151096
AT4G01460	down	-5.10253	0.00046648	-6.47689	3.65e-05
AT5G18020	down	-4.03039	9.18e-05	-7.40526	1.95e-06
AT5G18010	down	-5.47744	0.00120513	-5.93929	0.000313362
AT3G46490	down	-4.97558	0.00896474	-6.39923	0.000436392
AT3G53190	down	-4.03829	0.00168467	-7.23394	2.32e-05
AT4G19380	down	-5.81506	0.00102559	-5.31512	0.00239494
AT4G24275	down	-5.74757	0.000924133	-5.24764	0.0022036
AT1G29450	down	-5.72929	3.76e-05	-5.23481	1.69e-06
AT5G58390	down	-5.10113	0.0163771	-5.56299	0.00683154
AT4G18670	down	-6.04083	5.66e-05	-4.59971	2.56e-05
AT4G34580	down	-4.99769	0.0203383	-5.45954	0.00877114
AT5G63180	down	-4.79848	1.83e-05	-5.65587	6.23e-07
AT1G29510	down	-4.4508	2.76e-05	-5.94741	1.28e-06
AT2G37640	down	-5.50042	1.3e-05	-4.89325	7.4e-06
AT3G03830	down	-4.89631	0.00417693	-5.35817	0.00123598
AT5G20740	down	-4.61066	0.00112932	-5.62373	0.000206081
AT4G29610	down	-3.6543	0.00689732	-6.54926	3.72e-05
AT3G18217	down	-4.86736	0.0061799	-5.32922	0.00198984
AT5G02760	down	-4.91605	0.00416174	-5.27838	0.00123587
AT1G29500	down	-4.9487	8.83e-07	-5.24041	4.48e-08
AT5G18050	down	-4.4078	0.00695947	-5.77643	0.000751867
AT1G67750	down	-4.88644	0.00409469	-5.29701	0.00117613
AT5G22580	down	-4.26443	2.54e-05	-5.90167	1.1e-08
AT3G03820	down	-4.98288	2.1e-05	-5.12445	2.35e-06
AT5G18030	down	-3.86924	2.74e-05	-6.22134	3.43e-08
AT4G25420	down	-4.80719	0.00638401	-5.26905	0.00204916
AT5G41460	down	-4.79009	0.00915971	-5.25195	0.00318574
AT5G59360	down	-5.2666	0.0010996	-4.76667	0.0028216
AT2G32100	down	-4.65233	8.64e-06	-5.37624	3.81e-07
AT5G48490	down	-4.33208	0.00555436	-5.65719	0.000260095
AT5G25490	down	-4.75901	0.00608324	-5.22087	0.00190966
AT4G01580	down	-5.42844	0.00133945	-4.52298	0.00101079
AT2G42380	down	-4.61325	0.0024462	-5.22261	0.000520013
AT3G22790	down	-5.64482	0.00168126	-4.16286	0.00283004
AT1G77870	down	-4.19169	0.0175709	-5.61535	0.00080311
AT1G78970	down	-6.04501	0.000464958	-3.74611	0.00599905
AT3G29370	down	-4.60958	0.0304126	-5.07144	0.0136416
AT2G26710	down	-5.25984	0.000120708	-4.41611	7.69e-06
AT5G27780	down	-4.56735	0.00272541	-5.02921	0.000680028
AT3G27690	down	-4.38584	4.35e-06	-5.18447	2.48e-08
AT5G39150	down	-4.54857	0.018261	-5.01043	0.00713627
AT1G17700	down	-4.06353	0.0263681	-5.48718	0.00153695
AT1G29670	down	-4.7223	1.02e-11	-4.78046	8.54e-13
AT3G45680	down	-4.51841	0.00378196	-4.98027	0.000999988
AT4G34220	down	-4.18364	7.07e-07	-5.29549	2.5e-09
AT3G06770	down	-4.09569	1.86e-05	-5.36916	1.45e-06
AT4G33790	down	-5.47029	0.0071824	-3.98138	0.0348244
AT5G49800	down	-5.65494	0.000191708	-3.75683	0.00141059
AT3G23880	down	-3.59183	9.06e-06	-5.76659	1.71e-08
AT2G30424	down	-3.60436	0.00109973	-5.68779	6.29e-05
AT2G32990	down	-5.49555	3.55e-05	-3.79104	0.000629638
AT3G16370	down	-3.79675	4.42e-06	-5.48523	9.03e-12
AT1G13670	down	-4.40507	0.0304627	-4.86693	0.0132745
AT5G66520	down	-5.10751	0.00100692	-4.15452	0.00048072
AT5G15230	down	-3.55737	0.000558557	-5.69532	1.63e-08
AT1G56720	down	-3.94142	0.00770237	-5.29725	0.000763749
AT4G30180	down	-4.37283	0.0470855	-4.83469	0.0226801
AT4G10910	down	-4.36142	0.01032	-4.82328	0.00336578
AT1G69080	down	-4.83656	0.00778666	-4.33663	0.0158107
AT1G29460	down	-4.20238	4.49e-07	-4.93014	6.9e-09
AT1G29430	down	-3.79884	3.87e-06	-5.3201	8.93e-09
AT1G78820	down	-5.26572	2.68e-09	-3.82182	1.5e-06
AT1G59720	down	-4.79028	0.00139166	-4.29034	0.00383539
AT4G20940	down	-4.30087	0.0159719	-4.76273	0.00575102
AT3G12610	down	-4.48624	2.18e-08	-4.57495	1.67e-09
AT5G10150	down	-3.02933	7.12e-06	-6.02729	1.29e-08
AT3G01500	down	-3.87549	9.58e-09	-5.17931	2.38e-15
AT1G07450	down	-3.82096	0.00918596	-5.18472	0.000924009
AT4G29360	down	-4.2242	0.00630116	-4.7633	0.00156204
AT3G16380	down	-3.31868	0.0307805	-5.65443	0.000386124
AT5G18080	down	-4.02827	4.57e-05	-4.9251	1.26e-06
AT3G62950	down	-2.8075	0.0036033	-6.13807	1.04e-05
AT1G52245	down	-4.21642	0.0244936	-4.67828	0.00965627
AT4G38770	down	-4.04943	5.86e-07	-4.83361	8.72e-10
AT3G06130	down	-3.47125	0.000148292	-5.40727	7.22e-07
AT5G02890	down	-3.59818	0.0269184	-5.24356	0.00344133
AT1G64390	down	-3.73895	2.09e-05	-5.09536	1.09e-08
AT3G06140	down	-5.05179	0.00186778	-3.76917	0.0110944
AT3G43960	down	-4.83904	0.000624964	-3.98111	0.000134934
AT5G10605	down	-4.51904	5.83e-05	-4.28001	1.17e-05
AT5G02865	down	-4.16444	0.0128481	-4.6263	0.00420977
AT2G44830	down	-6.5013	1.62e-05	-2.28109	0.00504649
AT1G07490	down	-4.5381	0.00835595	-4.17323	0.00675664
AT5G58310	down	-3.8131	0.00017674	-4.87351	3.04e-06
AT2G05790	down	-4.05206	6.33e-07	-4.59872	8.01e-09
AT5G55730	down	-3.93004	0.000248924	-4.64622	1.09e-05
AT3G13405	down	-4.80621	0.00842639	-3.74898	0.0120073
AT1G50280	down	-2.31579	0.00494008	-6.22462	7.33e-06
AT4G39330	down	-4.05372	1.87e-06	-4.46228	7.54e-08
AT5G60490	down	-4.4958	0.0152775	-3.99587	0.0289359
AT5G39180	down	-3.98935	0.0496987	-4.45121	0.0228056
AT1G77690	down	-3.45493	0.00316959	-4.94508	0.000396684
AT1G54820	down	-4.52732	2.03e-07	-3.86024	4.17e-07
AT5G64120	down	-1.74256	0.0386049	-6.62299	8.27e-10
AT3G62930	down	-4.10492	0.00013463	-4.23845	2.06e-05
AT4G30410	down	-4.36196	0.0064174	-3.9473	0.0047281
AT3G60390	down	-3.3726	0.00112298	-4.92781	0.000166525
AT2G30420	down	-2.86971	0.0274485	-5.2435	0.00135256
AT2G45470	down	-4.00993	3.73e-07	-4.10038	8.88e-08
AT3G17360	down	-3.83183	0.0115191	-4.26354	0.00316412
AT4G19820	down	-3.79955	0.0239479	-4.26141	0.0086031
AT4G37750	down	-4.73691	0.00458319	-3.31831	0.0273521
AT3G17640	down	-3.49089	0.00071454	-4.56049	2.01e-05
AT3G05845	down	-2.85036	0.0176842	-5.19469	0.000896693
AT1G07485	down	-4.69446	0.00343515	-3.31713	0.0212674
AT1G35183	down	-3.7709	0.0428178	-4.23276	0.0181821
AT3G17840	down	-3.9089	1.63e-05	-4.08267	2.03e-06
AT4G32280	down	-3.75394	0.0429475	-4.2158	0.0181835
AT2G25810	down	-3.7458	0.0423555	-4.20765	0.017875
AT5G46700	down	-5.66012	0.000416865	-2.29115	0.0156972
AT1G19150	down	-3.83511	3.27e-10	-4.05158	6.84e-12
AT5G38420	down	-3.55996	3.45e-10	-4.29617	6.07e-15
AT5G24105	down	-2.3686	0.00872075	-5.48311	5.4e-05
AT2G05440	down	-3.00375	0.0417002	-4.8096	0.000827739
AT4G33220	down	-3.79919	7.37e-10	-4.00822	2.4e-11
AT5G44680	down	-4.01585	6.9e-08	-3.77049	9.1e-08
AT1G60390	down	-3.66136	0.0334106	-4.12322	0.012918
AT1G78460	down	-3.97236	3.45e-10	-3.80619	1.25e-10
AT1G20010	down	-3.5861	5.86e-10	-4.19024	2.08e-13
AT3G13175	down	-4.08631	0.021721	-3.68698	0.0205605
AT5G48900	down	-3.82539	4.15e-05	-3.94408	7.19e-06
AT5G39860	down	-3.37667	0.00695444	-4.36699	0.000494731
AT1G13650	down	-4.69777	2.9e-09	-3.03409	2.85e-05
AT3G48550	down	-4.84173	0.00149776	-2.88531	0.00197529
AT4G00480	down	-4.10316	0.0241142	-3.60322	0.0452906
AT2G35860	down	-3.75795	2.51e-06	-3.93717	2.91e-07
AT3G63200	down	-3.85429	0.00288256	-3.81381	0.00118098
AT3G62630	down	-3.57262	3.44e-10	-4.07303	2.19e-13
AT3G29631	down	-1.7706	0.00474763	-5.86649	1.72e-19
AT5G14090	down	-3.58713	0.0406282	-4.04899	0.0163001
AT2G39330	down	-5.18732	2.37e-06	-2.44307	0.0107478
AT5G62350	down	-4.13318	4.84e-13	-3.48217	1.57e-10
AT4G00950	down	-4.01882	4.96e-05	-3.57339	1.88e-05
AT3G02110	down	-4.04766	0.000340027	-3.49438	0.000372
AT1G22170	down	-4.19562	0.00408462	-3.3383	0.0021747
AT5G66960	down	-3.51894	0.0412127	-3.98079	0.0163738
AT1G67040	down	-3.94422	0.0247817	-3.54606	0.0235023
AT5G26220	down	-2.58105	0.017735	-4.90122	1.41e-05
AT1G18400	down	-3.16478	0.0287218	-4.31082	0.0057253
AT4G27595	down	-5.60071	0.000265934	-1.85451	0.0389606
AT5G51530	down	-3.05227	0.0414988	-4.40212	0.0052407
AT4G22560	down	-4.96429	0.00407242	-2.48114	0.0365732
AT3G51080	down	-3.39009	0.0050554	-4.03613	0.000795078
AT4G23290	down	-1.81921	0.0106328	-5.60642	5.1e-09
AT2G29290	down	-3.31125	4.06e-09	-4.11006	2.56e-13
AT4G26530	down	-3.31526	7.68e-07	-4.09551	3.5e-10
AT1G70895	down	-4.67675	0.00156227	-2.73326	0.00138614
AT1G45010	down	-2.87548	0.000349859	-4.51939	4.08e-08
AT2G21050	down	-4.66333	0.00203694	-2.73041	0.00966141
AT4G36360	down	-3.95393	1.15e-07	-3.40701	1.92e-06
AT5G16000	down	-4.0727	0.00110762	-3.28576	0.000835608
AT5G03995	down	-4.34567	0.00639187	-2.9913	0.0369017
AT1G21500	down	-2.8992	2.83e-09	-4.42503	2.08e-20
AT1G78320	down	-4.3685	0.00550503	-2.95498	0.00692433
AT4G13710	down	-4.2047	0.0138351	-3.11544	0.0196601
AT5G19170	down	-3.71468	0.0247542	-3.60471	0.0125156
AT2G45180	down	-2.77495	2.21e-06	-4.53778	5.64e-16
AT1G28290	down	-3.46074	0.0271949	-3.84836	0.0098952
AT5G57780	down	-3.02939	0.00550911	-4.23913	0.000437821
AT1G13250	down	-3.53355	0.000324065	-3.72075	5.42e-05
AT3G01440	down	-3.87016	5.73e-10	-3.35823	4.11e-10
AT4G12730	down	-3.08486	0.000200138	-4.13596	3.32e-07
AT4G21745	down	-3.85801	0.0216993	-3.35808	0.0436375
AT3G21190	down	-3.95165	2.26e-07	-3.25433	2.99e-06
AT3G29030	down	-4.04528	1.89e-05	-3.15774	0.000452982
AT2G26330	down	-4.32681	3.11e-07	-2.86576	2.47e-05
AT5G26230	down	-3.2717	0.00208494	-3.91734	0.000218222
AT2G28410	down	-3.7966	0.00114643	-3.34859	0.000766161
AT1G07880	down	-4.53193	0.00234426	-2.59961	0.0211751
AT4G14200	down	-3.23764	0.00227366	-3.86968	0.000215724
AT3G16660	down	-2.39528	0.0353162	-4.70781	5.25e-05
AT3G16250	down	-3.42002	4.26e-09	-3.63837	9.98e-11
AT4G10340	down	-2.94288	8.43e-14	-4.11303	2.72e-27
AT5G03760	down	-3.68533	9.46e-06	-3.34669	2.5e-05
AT3G46780	down	-3.1142	1.01e-11	-3.89307	2.18e-18
AT3G13510	down	-3.53754	2.17e-06	-3.46956	4.68e-07
AT1G55260	down	-3.64889	6.26e-07	-3.35139	2e-06
AT3G49670	down	-3.05213	6.53e-05	-3.92961	3.2e-07
AT2G41820	down	-4.09097	0.000931824	-2.88347	0.00175282
AT5G01240	down	-3.63478	1e-08	-3.32539	1.21e-08
AT5G54270	down	-3.12314	2.2e-12	-3.81792	1.02e-18
AT1G29920	down	-3.40362	1.18e-12	-3.53437	4.84e-14
AT5G58480	down	-3.58341	1.83e-06	-3.34935	3.16e-07
AT2G16850	down	-4.69687	0.00214792	-2.20193	0.0390264
AT4G21445	down	-2.90878	1.91e-05	-3.9831	6.92e-09
AT2G24350	down	-4.39237	0.00380795	-2.48225	0.0340706
AT2G42170	down	-4.12649	0.015735	-2.71765	0.0326618
AT5G12940	down	-3.25093	0.015706	-3.58261	0.00515138
AT5G67070	down	-3.41454	1.09e-05	-3.40947	5.75e-06
AT5G45950	down	-3.89643	1.26e-06	-2.91625	0.000200765
AT2G05070	down	-3.00731	2.12e-08	-3.80529	2.2e-13
AT4G12830	down	-3.2643	9.87e-08	-3.54791	9.06e-10
AT1G29420	down	-3.8667	0.0188339	-2.9409	0.0229536
AT1G36060	down	-1.91832	0.0242533	-4.8789	0.000216064
AT5G46220	down	-3.62226	0.00739262	-3.16212	0.0019258
AT4G31590	down	-3.89421	7.08e-07	-2.88319	4.41e-05
AT4G12620	down	-4.0846	0.0174531	-2.68968	0.0365785
AT1G78170	down	-3.47779	0.00276952	-3.29506	0.00118897
AT3G06145	down	-2.17557	0.00378058	-4.597	4.62e-08
AT5G64330	down	-4.21927	9.54e-09	-2.53342	6.12e-06
AT2G01590	down	-3.34672	5.86e-12	-3.40316	1.38e-13
AT5G19190	down	-1.77463	0.00414059	-4.95191	7.51e-17
AT5G46690	down	-2.92345	0.0141694	-3.79046	0.0017922
AT1G26945	down	-3.38375	0.00208494	-3.30326	0.000993864
AT4G04630	down	-3.56126	5.09e-05	-3.10753	3.65e-05
AT2G36570	down	-3.97338	0.002517	-2.67596	0.0086344
AT3G08920	down	-2.52855	3.95e-07	-4.09913	2.28e-15
AT5G56220	down	-3.63985	0.0256279	-2.97867	0.0242475
AT5G18300	down	-3.46517	0.0298552	-3.11758	0.0254455
AT4G12980	down	-3.31446	8.42e-08	-3.26047	4.62e-08
AT3G58100	down	-4.54121	0.00203092	-2.03088	0.00678607
AT4G22290	down	-3.01853	4.97e-07	-3.54648	1.69e-09
AT2G15128	down	-2.94861	0.0151527	-3.60604	0.0025953
AT5G41070	down	-2.81401	0.00914516	-3.69333	0.00094324
AT3G56370	down	-2.89178	0.000707339	-3.60708	1.63e-05
AT1G67830	down	-3.62825	4.56e-05	-2.8671	6.42e-05
AT2G34060	down	-2.98066	0.0120518	-3.51189	0.00231015
AT3G45160	down	-3.42999	8.51e-05	-3.05806	8.72e-05
AT3G23450	down	-2.74775	0.000127955	-3.7243	1.2e-07
AT5G47440	down	-2.98254	0.0410062	-3.47437	0.0126866
AT1G59920	down	-1.76986	0.0371289	-4.66036	2.63e-07
AT5G07690	down	-3.41955	1.09e-05	-2.98597	4.62e-05
AT5G59020	down	-3.45472	0.0108763	-2.94089	0.00342626
AT2G01420	down	-3.25962	3.76e-09	-3.12628	4.17e-09
AT2G22170	down	-3.26305	0.0014895	-3.10799	0.00143137
AT5G45820	down	-2.642	1.98e-06	-3.72772	1.01e-10
AT1G43650	down	-4.35198	0.00420976	-2.01313	0.0190299
AT3G60530	down	-3.25128	8.33e-07	-3.10822	4.49e-07
AT4G37110	down	-2.92695	0.000825956	-3.42599	5.6e-05
AT1G33170	down	-2.8491	2.58e-05	-3.49736	1.81e-07
AT5G18660	down	-3.3981	1.92e-07	-2.94041	7.46e-07
AT2G05810	down	-3.25042	0.011098	-3.07095	0.00488908
AT3G20350	down	-4.2676	0.000949472	-2.04057	0.00227069
AT2G40530	down	-2.60229	0.00112496	-3.69285	1.87e-05
AT2G19780	down	-2.37226	0.00603512	-3.90086	6.86e-05
AT2G15050	down	-2.9384	1.01e-06	-3.33309	1.23e-08
AT1G14700	down	-3.36332	5.36e-07	-2.89983	4.82e-07
AT1G15830	down	-2.67555	0.00359507	-3.58568	0.000153432
AT5G28290	down	-3.17312	0.00454525	-3.08479	0.00157885
AT2G23590	down	-3.96278	0.00402732	-2.28278	0.00835613
AT2G45400	down	-3.61517	0.0299843	-2.6219	0.0431304
AT3G08030	down	-3.16667	1.3e-07	-3.07016	1.36e-07
AT3G01680	down	-3.21231	1.41e-05	-3.01403	1e-05
AT3G59250	down	-2.97724	0.00388818	-3.24614	0.000804664
AT1G57820	down	-2.20241	0.0326808	-3.94813	0.00073776
AT3G06750	down	-2.33395	0.000559855	-3.81178	8.15e-09
AT5G41050	down	-2.64856	2.62e-07	-3.49702	8.08e-12
AT3G10840	down	-3.55654	7.09e-07	-2.58187	1.85e-06
AT4G39710	down	-2.40367	1.65e-10	-3.73175	2.36e-21
AT4G26760	down	-2.91572	0.00139034	-3.20385	0.000188514
AT1G29980	down	-3.81318	0.0139528	-2.30503	0.0396035
AT2G29310	down	-3.45118	1.51e-12	-2.6559	1.35e-09
AT4G12900	down	-3.30306	0.0170928	-2.79707	0.00708773
AT2G44230	down	-2.75075	3.16e-08	-3.33636	8.61e-12
AT5G04160	down	-3.03138	0.000616165	-3.04984	0.000253498
AT4G38660	down	-3.3497	0.0130721	-2.72507	0.0293441
AT1G04250	down	-3.5068	2.82e-08	-2.56648	2.56e-05
AT5G62840	down	-2.80362	2.59e-08	-3.25197	2.9e-11
AT5G66560	down	-2.50187	5.74e-05	-3.53348	3.37e-08
AT1G12460	down	-2.34042	0.0072036	-3.6798	7.64e-05
AT4G26542	down	-3.49895	0.0283783	-2.49972	0.0379097
AT4G38430	down	-3.16703	1.52e-10	-2.82508	1.29e-09
AT1G68520	down	-2.67929	3e-05	-3.30978	1.13e-07
AT5G19090	down	-3.41869	0.000572241	-2.57006	0.0048621
AT1G15820	down	-2.5169	1.38e-06	-3.46593	5.02e-12
AT3G52910	down	-3.14764	0.0262462	-2.83117	0.0252939
AT1G75680	down	-3.23485	6.51e-07	-2.74265	1.15e-05
AT5G58550	down	-3.68399	0.0167324	-2.28094	0.0269168
AT1G32470	down	-2.46155	1.89e-10	-3.48727	1.75e-20
AT5G01790	down	-2.99331	8.51e-05	-2.94723	4.56e-05
AT1G12500	down	-2.463	0.00027818	-3.46647	3.3e-07
AT1G14180	down	-2.51717	0.0264972	-3.40822	0.00392129
AT5G18060	down	-3.0028	0.00641532	-2.91669	0.00358972
AT1G45130	down	-3.58946	0.00539751	-2.32817	0.0179336
AT2G35960	down	-1.82004	0.000489536	-4.08283	2.02e-14
AT5G64770	down	-3.2664	3.53e-06	-2.63047	0.000153918
AT3G53240	down	-3.20303	4.04e-06	-2.68634	5.5e-06
AT1G70710	down	-2.966	0.0349842	-2.9087	0.0230419
AT5G36002	down	-3.02834	0.0081943	-2.83319	0.00247288
AT1G70370	down	-2.96146	3.84e-07	-2.89679	2.9e-07
AT1G14150	down	-3.25584	3.27e-10	-2.57964	8.78e-08
AT4G21280	down	-2.29334	4.47e-06	-3.53435	1.42e-13
AT4G25150	down	-2.23111	0.0190478	-3.59198	0.00076267
AT5G07152	down	-3.76259	0.0121046	-2.05977	0.0232132
AT5G43870	down	-3.04912	5.1e-07	-2.75793	6.83e-07
AT3G28420	down	-3.10989	0.00820459	-2.69386	0.0039512
AT4G28080	down	-3.24819	4.47e-13	-2.55477	6.56e-09
AT1G80640	down	-3.28859	4.53e-07	-2.49775	1.06e-05
AT3G25500	down	-2.09838	9.59e-06	-3.68403	1.19e-13
AT1G15180	down	-3.14372	1.39e-07	-2.63112	2.42e-06
AT3G15540	down	-2.08274	0.0192424	-3.68268	0.000170159
AT1G77060	down	-2.54229	3.11e-09	-3.21931	3.31e-14
AT4G36180	down	-3.50186	0.0194433	-2.25438	0.0359636
AT5G07580	down	-2.59348	1.51e-06	-3.15908	1.89e-09
AT5G07590	down	-3.31602	0.000119906	-2.43648	0.000779025
AT2G44040	down	-3.32537	0.00309048	-2.42015	0.0161976
AT2G29050	down	-2.75486	0.000605599	-2.98446	8.44e-05
AT2G37790	down	-3.75056	4.52e-08	-1.98688	0.000534352
AT4G14740	down	-3.44772	1.13e-08	-2.27997	1.52e-05
AT4G26790	down	-3.30342	0.00176166	-2.3773	0.00851711
AT1G29910	down	-2.66964	4.38e-08	-3.00265	2.56e-10
AT4G12880	down	-3.10806	1.12e-06	-2.56264	3.52e-05
AT1G09310	down	-3.29445	9.08e-08	-2.3753	0.000119917
AT1G75710	down	-2.6553	0.000207382	-3.01258	1.15e-05
AT3G21460	down	-2.57617	0.0193204	-3.0887	0.00352447
AT1G45201	down	-3.09187	1.62e-06	-2.56889	5.34e-05
AT1G34065	down	-3.45391	0.0154475	-2.20101	0.0228698
AT1G66430	down	-3.66347	2.65e-05	-1.97543	0.00888752
AT3G54720	down	-3.56806	0.00305208	-2.0566	0.0157017
AT5G16250	down	-2.70325	0.015406	-2.91696	0.00590678
AT3G56330	down	-3.64907	0.0012289	-1.96409	0.00675747
AT4G13577	down	-2.09115	0.0111971	-3.52126	2.17e-05
AT5G66310	down	-2.85422	0.00914516	-2.75593	0.00357519
AT2G43360	down	-3.27611	2.03e-07	-2.31641	5.6e-05
AT1G21560	down	-3.17772	1.05e-06	-2.39817	1.03e-06
AT2G02780	down	-2.63721	0.0237895	-2.93247	0.00679883
AT4G17810	down	-2.46504	0.000178083	-3.09904	1.68e-06
AT3G01810	down	-2.94968	1.19e-06	-2.59962	1.4e-06
AT5G56530	down	-3.33491	0.00332671	-2.20965	0.0133383
AT3G01690	down	-2.74042	2.05e-09	-2.79809	2.73e-10
AT1G26210	down	-3.47827	1.58e-05	-2.05418	0.00667585
AT5G45930	down	-3.0175	3.55e-07	-2.51175	5.03e-06
AT5G55540	down	-2.99899	5.82e-05	-2.52457	3.92e-05
AT5G58960	down	-3.02079	4.6e-05	-2.49579	3.57e-05
AT1G70890	down	-4.10032	6.09e-09	-1.41268	0.0326406
AT1G05850	down	-2.49688	2.84e-06	-3.01588	5.67e-09
AT2G17880	down	-3.10425	0.00844863	-2.40234	0.0139627
AT2G19460	down	-2.42773	2.9e-05	-3.06311	8.34e-08
AT3G47470	down	-2.59515	7.22e-13	-2.89392	2.28e-16
AT3G24000	down	-2.98717	0.00381454	-2.47521	0.00564466
AT5G12900	down	-2.19305	0.000558021	-3.26464	9.28e-07
AT3G02250	down	-2.92113	3.59e-06	-2.53515	4.85e-06
AT3G55420	down	-3.02283	2.07e-05	-2.41898	0.000121494
AT1G06640	down	-2.72106	8.76e-08	-2.70863	4.08e-08
AT1G52230	down	-2.09001	5e-06	-3.33867	2.21e-14
AT2G38970	down	-2.82676	0.00279049	-2.59863	0.00157764
AT3G59890	down	-2.53989	0.0497875	-2.88464	0.0183101
AT3G07540	down	-3.51772	0.000881219	-1.90127	0.0237798
AT1G30380	down	-2.37158	3.36e-06	-3.03854	7.34e-10
AT4G14550	down	-2.83361	0.000426455	-2.5636	0.000687979
AT1G23080	down	-2.82786	9.13e-05	-2.56868	0.000193786
AT4G13840	down	-2.84597	0.000111799	-2.54916	0.000335238
AT2G27385	down	-3.7576	1.57e-06	-1.63721	0.0392674
AT1G53840	down	-2.42734	6.78e-07	-2.96514	4.74e-10
AT4G36410	down	-3.03466	0.0295739	-2.34933	0.0422786
AT5G63780	down	-2.71591	1.29e-09	-2.66246	5.27e-11
AT3G43720	down	-2.61271	3.77e-05	-2.75826	7.98e-06
AT1G11290	down	-2.00398	0.0105295	-3.3548	0.000167535
AT3G50240	down	-2.5517	0.0206354	-2.80556	0.00609215
AT2G37450	down	-2.79937	7.1e-06	-2.54897	7.22e-06
AT4G24350	down	-2.58694	6.37e-05	-2.75223	9.87e-06
AT1G01300	down	-2.86623	3.29e-07	-2.46678	2.15e-06
AT1G60270	down	-3.22205	0.000306414	-2.09239	0.00557412
AT1G55490	down	-3.30296	4.89e-09	-1.99567	0.000345629
AT4G30110	down	-2.89067	0.00195988	-2.40496	0.0044961
AT4G37450	down	-2.82165	0.00584893	-2.4603	0.0134801
AT5G65310	down	-2.90697	2.51e-06	-2.36897	3.31e-05
AT2G14890	down	-2.69657	0.00129335	-2.57681	0.00162897
AT1G70760	down	-2.25977	4.13e-08	-3.01205	5.47e-14
ATCG01090	down	-2.03069	2.57e-06	-3.23853	6.07e-15
AT4G22130	down	-2.28542	0.00169863	-2.98253	4.15e-05
AT1G07320	down	-2.37081	8.7e-08	-2.8812	2.02e-11
AT2G32010	down	-2.24452	0.00301169	-2.99491	5.54e-05
AT5G56780	down	-3.3522	0.010128	-1.88418	0.0120695
AT5G13100	down	-1.88284	0.000331082	-3.3467	5.98e-11
AT5G44578	down	-1.86419	0.0409268	-3.36291	0.00122042
AT5G23860	down	-2.70229	8.4e-06	-2.523	1.56e-05
AT3G48870	down	-3.10015	7.65e-07	-2.1208	0.000580692
AT2G39560	down	-2.35187	0.0468503	-2.86247	0.0117682
AT3G50270	down	-2.19519	0.000982505	-3.01722	5.31e-06
AT5G63810	down	-2.52287	0.0100288	-2.68372	0.00304128
AT2G29180	down	-2.22399	4.82e-06	-2.98121	2.89e-10
AT2G35260	down	-2.82584	1.78e-20	-2.34729	1.82e-15
AT3G53170	down	-2.32931	0.0292627	-2.83909	0.0056544
AT3G17170	down	-3.34753	1.06e-08	-1.81345	0.000690836
AT4G31840	down	-2.70193	0.0117128	-2.4414	0.0144558
AT5G08185	down	-3.20176	0.0189981	-1.93774	0.0261719
AT5G06870	down	-1.77577	0.00834937	-3.35905	1.47e-07
AT5G15310	down	-2.39288	0.00115529	-2.73936	0.000113061
AT3G13980	down	-3.30357	0.00491826	-1.82627	0.0239605
AT3G58000	down	-3.36181	0.000151474	-1.76293	0.00334838
AT3G59420	down	-3.33681	0.00234013	-1.78787	0.00878202
AT2G43550	down	-2.76846	0.000129886	-2.35127	0.000550152
AT1G31330	down	-2.29515	4.92e-06	-2.79429	9.93e-09
AT5G05790	down	-1.94013	0.0126915	-3.14028	0.000311709
AT1G55670	down	-2.09414	1.57e-05	-2.97724	1.6e-10
AT5G66750	down	-2.46365	0.0142392	-2.59969	0.00511245
AT1G20190	down	-3.34077	8.06e-05	-1.71864	0.0450139
AT3G08660	down	-2.41976	0.0212794	-2.62671	0.00541366
AT5G55740	down	-3.43771	3.43e-05	-1.60803	0.00541839
AT1G28100	down	-1.64299	0.00714789	-3.39522	5.31e-07
AT4G10120	down	-2.29717	0.000623781	-2.73966	2.45e-05
AT3G22150	down	-2.7992	6.64e-07	-2.22483	7.32e-06
AT1G50460	down	-2.56592	1.68e-06	-2.45553	1.37e-06
AT3G14980	down	-3.68352	0.000876107	-1.33162	0.0410594
AT2G35620	down	-2.45007	4.31e-06	-2.55872	2.68e-07
AT1G70210	down	-2.21355	0.0178376	-2.79351	0.00203013
AT3G08940	down	-2.09033	1.46e-06	-2.91493	2.84e-12
AT3G17350	down	-2.61154	0.0143265	-2.37829	0.010139
AT5G04230	down	-3.23794	0.00181314	-1.74998	0.0183758
AT4G34090	down	-2.62009	1.21e-13	-2.35542	1.14e-13
AT2G33570	down	-2.49863	0.00303259	-2.47122	0.00183837
AT5G35490	down	-1.59928	0.00261996	-3.36888	4.28e-11
AT3G12820	down	-2.46362	0.00982263	-2.50075	0.00427541
AT4G39350	down	-2.6276	3.23e-08	-2.33037	2.63e-07
AT4G32800	down	-2.15498	0.00653146	-2.80137	0.00030044
AT5G19220	down	-1.98756	1.17e-06	-2.96801	1.89e-13
AT4G38160	down	-2.36934	5.87e-05	-2.57715	6.22e-06
AT1G26761	down	-2.54904	3.46e-06	-2.39337	1.14e-06
AT1G49580	down	-2.60964	0.00732683	-2.32365	0.0059155
AT3G10080	down	-1.5292	0.0294402	-3.40353	1.6e-06
AT2G38120	down	-2.31996	0.00166371	-2.60439	0.000260835
AT4G13500	down	-1.52628	0.000282967	-3.39565	8.42e-16
AT3G54890	down	-2.6233	8.23e-12	-2.2965	1.45e-09
AT5G41900	down	-2.4011	0.0185103	-2.51541	0.00939275
AT4G36250	down	-3.13953	3.87e-09	-1.76971	0.000527354
AT2G25480	down	-2.43239	0.00146324	-2.47556	0.000326051
AT1G45207	down	-2.52857	0.0319458	-2.37143	0.0245673
AT1G48315	down	-2.09634	0.030472	-2.79553	0.00306147
AT3G50100	down	-2.29854	0.0152983	-2.58911	0.0029038
AT1G34010	down	-2.798	1.09e-05	-2.08661	4.33e-05
AT4G00165	down	-2.73982	1.84e-14	-2.14436	2.81e-10
AT1G80050	down	-2.36752	0.00271644	-2.51381	0.000956585
AT2G30150	down	-2.43053	1.91e-05	-2.44631	1.61e-06
AT2G01755	down	-2.30387	7.13e-05	-2.57001	2.94e-06
AT2G02980	down	-2.57336	0.00741752	-2.29492	0.00251373
AT5G12250	down	-2.50194	1.31e-06	-2.36264	2.81e-06
AT3G23810	down	-2.78363	0.00107126	-2.07815	0.0151061
AT3G01960	down	-2.20446	0.0260811	-2.65731	0.00497315
AT5G23810	down	-3.10376	0.0222831	-1.75764	0.0375295
AT4G23440	down	-2.49428	0.0027532	-2.36163	0.00107332
AT1G18650	down	-2.22192	0.00309048	-2.63278	0.0002731
AT1G13170	down	-2.53791	0.00214626	-2.31355	0.00186701
AT5G58260	down	-1.97985	1.98e-05	-2.87067	3.19e-10
AT2G18560	down	-2.26299	9.37e-06	-2.58265	7.76e-08
AT1G65010	down	-2.60073	1.69e-05	-2.24122	7.76e-05
AT1G04240	down	-2.58755	0.000365439	-2.2374	0.00140145
AT3G08943	down	-2.4662	1.98e-07	-2.34797	3.15e-07
AT4G01080	down	-2.23028	0.00363597	-2.58122	0.000485315
AT4G31250	down	-1.77885	0.0132457	-3.02286	0.000167733
AT5G57830	down	-1.98336	0.0240016	-2.81479	0.00214507
AT2G40030	down	-2.22973	0.000384232	-2.56602	1.81e-05
AT1G47655	down	-2.26312	0.0216145	-2.52428	0.00513061
AT1G42970	down	-2.25565	1.96e-08	-2.53038	1.03e-10
AT5G22340	down	-2.60534	9.34e-07	-2.16585	2.5e-05
AT5G13730	down	-2.60515	2.12e-08	-2.16184	3.91e-08
AT1G67590	down	-3.07037	2.92e-06	-1.67761	0.000940914
AT5G48460	down	-2.30853	0.000401751	-2.42024	6.05e-05
AT5G46570	down	-2.53878	0.00112319	-2.1887	0.00114741
AT5G16720	down	-2.32094	0.00379433	-2.40558	0.000730822
AT1G46264	down	-2.73378	0.00582992	-1.98945	0.0171526
AT1G34640	down	-2.752	9.42e-09	-1.965	1.56e-05
AT1G61170	down	-2.16293	0.000268434	-2.55364	7.42e-06
AT4G25830	down	-3.25673	0.000199499	-1.45815	0.0454
AT2G34680	down	-2.07139	0.00531969	-2.63879	0.000256817
AT4G35640	down	-1.75	0.0364441	-2.95509	0.000793463
ATCG00560	down	-1.90886	4.5e-05	-2.79148	6.4e-10
AT4G02790	down	-2.7556	1.22e-09	-1.94463	5.58e-07
AT4G14440	down	-2.25763	0.000683529	-2.43882	0.000148363
AT5G50450	down	-2.79931	0.000230772	-1.89583	0.00154123
AT5G39210	down	-2.0324	2.96e-05	-2.65467	2.15e-08
AT1G12860	down	-2.86924	1.95e-06	-1.80786	0.000847955
AT1G23170	down	-1.82807	0.0161864	-2.84746	0.000215784
AT4G21960	down	-2.56452	9.29e-07	-2.09865	5.41e-05
AT5G44530	down	-2.53027	9.71e-06	-2.12816	5.74e-05
AT1G12330	down	-3.29864	2.83e-05	-1.35377	0.0262182
AT1G11860	down	-2.46177	2.34e-07	-2.18369	3.18e-06
AT5G61570	down	-2.38206	0.000408328	-2.2612	0.000134149
AT3G28080	down	-1.8367	0.00092167	-2.80629	2.06e-07
AT4G07400	down	-2.13733	0.00456564	-2.50541	0.000389086
AT1G22590	down	-2.64485	9.11e-06	-1.99563	0.000530915
AT2G34560	down	-2.74882	2.39e-08	-1.88536	3.91e-05
AT1G72500	down	-2.10117	3e-05	-2.53231	1.91e-07
AT1G15260	down	-2.026	0.000303257	-2.60716	1.58e-06
AT1G09340	down	-2.17794	2.1e-08	-2.45282	9e-11
AT3G11630	down	-2.17447	5.33e-05	-2.45447	2.82e-06
AT4G24930	down	-1.99661	1.36e-07	-2.63033	9.9e-13
AT1G47210	down	-1.40523	0.0461006	-3.22009	1.41e-06
AT5G60200	down	-2.83353	0.0013124	-1.7836	0.0246943
AT4G37925	down	-2.03795	2.98e-05	-2.57867	4.89e-08
AT1G26230	down	-3.40565	0.000210309	-1.18998	0.0205164
AT1G15980	down	-2.38701	8.93e-08	-2.19944	3.42e-07
AT5G43750	down	-2.0977	6.57e-06	-2.48829	3.56e-08
AT5G19730	down	-1.99997	0.0458809	-2.58488	0.00689845
AT3G54260	down	-1.88532	0.0130647	-2.6909	0.000452272
AT4G17560	down	-2.19822	2.28e-06	-2.37657	1.55e-07
AT5G18690	down	-2.3384	0.0144319	-2.23545	0.0134432
AT1G51400	down	-1.76231	0.00122261	-2.81135	5.43e-08
AT3G48200	down	-2.39105	1.02e-11	-2.18062	1.43e-11
AT5G23100	down	-2.60361	0.000669884	-1.96763	0.00097731
AT1G10360	down	-1.75402	0.000233849	-2.81671	9.37e-10
AT4G29560	down	-2.53822	0.0285061	-2.02275	0.0217743
AT1G75500	down	-1.9821	7.37e-05	-2.57483	1.08e-07
AT5G49100	down	-1.42828	0.011735	-3.12772	5.04e-08
AT1G08380	down	-2.00367	4.94e-06	-2.55178	1.82e-09
AT5G50375	down	-1.70166	0.00237731	-2.83483	9.65e-07
AT1G17200	down	-2.69838	2.2e-07	-1.83729	0.000255683
AT1G27210	down	-1.99259	0.00610328	-2.53843	0.00030382
AT5G24420	down	-2.62328	0.00174997	-1.90664	0.0117662
AT2G47880	down	-2.03701	0.0216993	-2.49209	0.00331641
AT2G14860	down	-2.83978	0.00715556	-1.68322	0.0316835
AT5G22640	down	-2.97968	3.45e-09	-1.53633	0.00178879
AT5G06270	down	-2.78161	8.7e-05	-1.73109	0.00777845
AT4G37740	down	-2.34028	0.0265592	-2.17131	0.0177827
AT3G29670	down	-2.14335	0.00497801	-2.36195	0.000931
AT4G01310	down	-2.232	2.56e-06	-2.27015	9.47e-07
AT4G00360	down	-1.80001	0.00441322	-2.70031	7.19e-06
AT5G25590	down	-2.861	0.00513635	-1.63809	0.0430263
AT1G25425	down	-2.24672	0.00266188	-2.25174	0.00118902
AT2G32560	down	-2.42088	1.34e-06	-2.07205	1.88e-05
AT2G32500	down	-2.14918	2.64e-07	-2.34346	3.15e-09
AT5G42040	down	-2.58439	0.0307649	-1.90585	0.0354348
AT5G61270	down	-1.87805	0.00069728	-2.60613	2.19e-06
AT5G57930	down	-2.09776	7.91e-08	-2.38642	2.87e-10
AT1G06680	down	-1.7747	9.11e-06	-2.70333	1.55e-12
AT2G33050	down	-2.53366	6.62e-05	-1.94376	0.000613889
AT1G20340	down	-1.72446	0.000440999	-2.74486	3.73e-09
AT3G52500	down	-1.80071	0.000392447	-2.66724	7.2e-08
AT1G62590	down	-2.4729	0.00503998	-1.98731	0.00354956
AT1G64720	down	-2.05654	1.18e-07	-2.40365	1.81e-10
AT1G71720	down	-2.63484	2.52e-06	-1.8149	2.59e-05
AT5G36700	down	-1.81418	4.94e-06	-2.62384	7.29e-12
AT5G13690	down	-2.51039	3e-05	-1.92463	0.000306572
AT1G74690	down	-2.19744	9.39e-06	-2.22896	2.47e-06
AT1G66180	down	-1.69503	0.000364688	-2.73047	6.56e-09
AT4G15560	down	-2.21164	5.86e-10	-2.21332	2.15e-10
AT1G78270	down	-2.31686	0.00738109	-2.10656	0.00568218
AT1G77490	down	-2.30033	8.13e-06	-2.12202	1.62e-05
AT3G28860	down	-2.93996	2.03e-05	-1.47932	0.0218717
AT5G62890	down	-2.40639	5.84e-09	-2.01094	3.74e-07
AT5G10690	down	-2.50184	3.62e-06	-1.91092	0.000124102
AT5G36790	down	-1.81287	5.04e-06	-2.5997	1.15e-11
AT5G55230	down	-2.39736	2.1e-09	-2.01339	6.74e-08
AT2G43445	down	-2.23845	0.0284165	-2.17154	0.014793
AT2G39470	down	-2.02965	1.05e-09	-2.36478	2.03e-13
AT3G12080	down	-2.44509	6.68e-09	-1.94658	1.2e-06
AT2G28150	down	-2.38884	0.000828774	-1.98989	0.00169852
AT5G58930	down	-2.17219	3.25e-07	-2.20523	3.95e-08
AT4G22120	down	-2.69741	0.000726623	-1.67838	0.0138237
AT1G03630	down	-2.4833	9.06e-11	-1.88998	3.93e-07
AT5G09870	down	-2.05731	4.55e-05	-2.31594	2.25e-06
AT2G02100	down	-2.58845	0.000991302	-1.76088	0.0255116
AT2G43900	down	-2.57288	2.35e-06	-1.77609	0.000506008
AT1G80690	down	-2.34615	0.0216993	-1.99872	0.0247466
AT3G61550	down	-2.27056	2.89e-05	-2.07184	4.29e-05
AT1G61520	down	-2.17188	1.05e-10	-2.16957	4.62e-11
AT1G03130	down	-2.08108	1.56e-05	-2.26016	1.5e-06
AT5G06050	down	-2.66896	0.000146127	-1.66894	0.00309184
AT3G04980	down	-1.81263	0.0208671	-2.51436	0.00135447
AT4G34900	down	-2.41872	0.027308	-1.9057	0.047441
AT1G11790	down	-1.74107	1.41e-05	-2.57801	1.28e-10
AT5G65700	down	-2.26731	0.00106144	-2.04997	0.00214277
AT1G48350	down	-2.06798	7.06e-05	-2.24837	9.35e-06
AT3G28760	down	-2.42259	0.000190116	-1.88584	0.000300522
AT5G40610	down	-2.54247	0.000540582	-1.76539	0.00687121
AT5G13460	down	-2.65806	0.00236196	-1.64739	0.0294338
AT3G28040	down	-1.72609	0.00238799	-2.57294	2.09e-06
AT5G64040	down	-1.54194	0.00152359	-2.75085	1.82e-09
AT2G35700	down	-2.15344	0.0178206	-2.13893	0.00717747
AT1G54310	down	-2.62776	3.84e-05	-1.6646	0.00226929
AT2G34860	down	-2.01132	1e-10	-2.2781	4.09e-14
AT2G04032	down	-2.16625	0.0499718	-2.12143	0.0304998
AT1G52510	down	-2.24658	5.46e-08	-2.0408	1.32e-07
AT5G58600	down	-2.57664	0.0128481	-1.70232	0.027666
AT3G06150	down	-2.35612	8.15e-06	-1.9185	6.74e-05
AT3G19570	down	-2.36356	0.00775914	-1.90915	0.00883179
AT4G08685	down	-2.71577	6.3e-05	-1.55582	0.0203482
AT1G05590	down	-1.7823	9.12e-07	-2.48921	6.21e-12
AT3G21055	down	-1.46283	0.0029834	-2.79694	1.2e-09
AT1G32990	down	-2.12318	5.99e-06	-2.13228	3.16e-06
AT1G14030	down	-2.74562	2.53e-07	-1.50222	0.00145759
AT2G26580	down	-1.91311	3.66e-07	-2.33249	1.37e-10
AT5G67200	down	-1.96108	0.0463203	-2.28385	0.0135673
AT2G28000	down	-2.6378	3.79e-06	-1.60549	0.00570604
AT3G56060	down	-1.68695	0.0191617	-2.55371	0.000293736
AT4G05330	down	-1.85921	0.00087628	-2.37788	1.09e-05
AT2G45190	down	-2.02515	0.000786171	-2.21118	0.000115989
AT4G22730	down	-2.60555	0.000300545	-1.62431	0.00276833
AT5G11790	down	-2.59223	1.57e-05	-1.63664	0.00388907
AT2G23610	down	-2.12183	5.13e-06	-2.10489	2.53e-06
AT2G12462	down	-2.27977	0.037025	-1.93519	0.0401759
AT4G30400	down	-1.81357	0.00376343	-2.40034	7.6e-05
AT3G54050	down	-2.0014	3.39e-09	-2.20606	2.19e-11
AT2G35370	down	-1.6528	1.87e-07	-2.55459	4.6e-17
AT3G53100	down	-2.28878	0.00208548	-1.91041	0.0044961
AT3G61470	down	-1.80711	6.04e-07	-2.3782	9.63e-12
AT1G43670	down	-2.03041	3.27e-10	-2.1348	9.94e-12
AT4G05180	down	-1.58948	0.00039127	-2.57379	1.46e-09
AT2G05210	down	-2.11379	0.00400809	-2.04704	0.00167579
AT1G63150	down	-2.73104	0.00022038	-1.42381	0.0140057
AT3G19850	down	-2.17323	0.000277128	-1.97907	0.000288343
AT1G14840	down	-2.68622	3.29e-06	-1.46062	0.00352041
AT1G11130	down	-2.25523	0.0143407	-1.88843	0.0148154
AT4G30720	down	-2.45294	4.09e-06	-1.68989	0.000672909
AT3G18485	down	-2.50718	0.0147622	-1.63271	0.0488224
AT5G19530	down	-2.41661	8.33e-07	-1.72194	0.000263081
AT4G17460	down	-1.86142	0.00587086	-2.26903	0.000437821
AT2G36000	down	-2.39176	1.34e-07	-1.73029	5.3e-05
AT2G45340	down	-1.52249	0.00250058	-2.59287	2.54e-07
AT2G35130	down	-2.32069	2.92e-05	-1.79248	0.000154291
AT1G76100	down	-1.90029	1.96e-06	-2.21063	1.23e-08
AT2G46710	down	-2.40513	2.49e-05	-1.70304	0.000930916
AT5G06690	down	-2.40208	0.000572241	-1.70427	0.00273009
AT3G26960	down	-2.44943	0.000155324	-1.65454	0.00921329
AT2G06520	down	-1.71666	3.69e-05	-2.37696	2.74e-09
AT5G14060	down	-2.0038	5.52e-08	-2.08923	4.65e-09
AT1G49380	down	-2.8058	7.41e-11	-1.28427	0.000372397
AT3G23805	down	-1.98818	0.0014335	-2.10034	0.000485225
AT1G29470	down	-2.06912	4.49e-07	-2.01446	3.98e-07
AT3G23820	down	-1.48086	0.00679514	-2.60114	4.18e-07
AT5G11410	down	-2.17447	0.0107557	-1.90624	0.00668654
AT5G46110	down	-1.42191	0.000875376	-2.65389	3.53e-11
AT5G18500	down	-1.77114	6.43e-07	-2.30279	2.73e-11
AT2G22980	down	-1.94598	0.000184363	-2.12399	1.78e-05
AT4G28760	down	-2.20884	1.55e-06	-1.85636	1.49e-05
AT5G49630	down	-1.52656	0.00754644	-2.53702	3.26e-06
AT2G40690	down	-2.01298	0.00168467	-2.04769	0.000346422
AT5G50420	down	-2.37904	4.82e-06	-1.67703	0.000140681
AT1G26560	down	-2.13215	0.00018291	-1.91736	0.000583267
ATCG00710	down	-1.72489	0.00894956	-2.32381	0.000244442
AT1G16350	down	-2.54914	7.41e-06	-1.49793	0.00486048
AT5G43810	down	-1.88887	0.00157377	-2.15174	0.000106636
AT2G05100	down	-1.45418	0.00319733	-2.58189	2.35e-08
AT1G29530	down	-2.02459	4.85e-05	-2.00487	2.9e-05
AT5G53580	down	-2.02508	2.02e-12	-2.00376	1.39e-13
AT5G08835	down	-2.21657	0.000352926	-1.81038	0.00110001
AT5G03530	down	-2.50488	0.00166597	-1.51891	0.0259918
AT4G19020	down	-2.40222	0.00576589	-1.62114	0.0174659
AT5G50280	down	-2.3767	4.77e-06	-1.64045	0.000647511
AT1G79500	down	-2.36218	0.00025933	-1.65359	0.00349589
AT1G50732	down	-1.54222	0.00224902	-2.47167	4.45e-07
AT5G54530	down	-1.92599	0.043612	-2.08367	0.0155758
AT5G47190	down	-1.79841	0.000132001	-2.21021	1.17e-06
AT4G01150	down	-1.75688	1.91e-06	-2.24887	2.87e-10
AT2G21330	down	-1.96697	1.7e-05	-2.03602	5.47e-06
AT5G05620	down	-2.86376	3.83e-05	-1.13674	0.0265957
AT3G12690	down	-1.69372	0.0154077	-2.30436	0.000667092
AT1G10370	down	-1.67137	0.0245798	-2.32509	0.000940914
AT3G45890	down	-1.82619	0.00151263	-2.16933	7.67e-05
AT2G27810	down	-2.06654	0.000144304	-1.92588	6.35e-05
AT2G27040	down	-2.50546	4.52e-05	-1.48276	0.0047354
AT1G72410	down	-2.18197	8.62e-05	-1.80615	0.000355777
AT3G56160	down	-1.52468	0.0128912	-2.46066	9.03e-05
AT3G09800	down	-2.44619	0.000258118	-1.53052	0.00780189
AT1G64770	down	-1.62794	0.000153672	-2.34608	1.54e-08
AT4G38970	down	-1.92046	1.89e-07	-2.05114	1.23e-08
AT3G63140	down	-1.96712	2.68e-05	-2.00201	1.14e-05
AT4G24510	down	-2.3167	0.00324498	-1.65231	0.0294505
AT5G23060	down	-1.69615	0.00120596	-2.2705	6.14e-06
AT4G18370	down	-1.71868	4.6e-06	-2.23795	7.92e-10
AT2G22230	down	-2.33956	0.00165181	-1.61104	0.0236384
AT1G74970	down	-1.65884	0.000334693	-2.28619	2.57e-07
AT4G20760	down	-2.55394	4.01e-07	-1.38895	0.00182041
AT2G36990	down	-2.34677	2.33e-10	-1.59222	6.44e-06
AT4G34620	down	-1.32327	7.76e-05	-2.61326	1.16e-16
AT4G37250	down	-1.75713	0.00290191	-2.17892	0.000101296
AT3G24430	down	-2.21387	1.77e-10	-1.71921	5.36e-08
AT2G46820	down	-1.73777	0.000452207	-2.19365	4.32e-06
AT4G12800	down	-1.92188	1.92e-06	-2.0093	3.66e-07
AT5G07860	down	-1.25129	0.0176489	-2.67979	1.14e-06
AT5G65810	down	-2.2435	0.00020652	-1.68614	0.00348436
AT4G30950	down	-2.05613	3.83e-12	-1.86329	1.24e-10
AT1G70410	down	-1.89064	5.53e-07	-2.02705	3.4e-08
AT3G48040	down	-1.42735	0.000965707	-2.46984	2.64e-08
AT2G20300	down	-2.20542	0.000211883	-1.69031	0.00171116
AT1G56670	down	-1.76829	0.0393097	-2.12475	0.00874591
AT3G54880	down	-1.56035	0.0042091	-2.33169	1.04e-05
AT4G02130	down	-1.62653	0.000158497	-2.26521	4.83e-08
AT1G01080	down	-2.17317	6.01e-07	-1.71726	2.45e-05
AT4G23790	down	-1.97442	0.00433553	-1.9066	0.00344059
AT1G67910	down	-1.27359	0.00305187	-2.60199	1.61e-08
AT3G27160	down	-1.56185	0.000182391	-2.31221	8e-09
AT4G26520	down	-2.20405	2.59e-06	-1.66906	0.00013813
AT5G62700	down	-2.29265	8.85e-05	-1.57131	0.00756399
AT1G68060	down	-2.21018	4.92e-05	-1.64947	0.000940914
AT4G16008	down	-1.65075	0.0025842	-2.20656	2.73e-05
AT5G52970	down	-1.99873	1.4e-06	-1.85833	1.77e-06
AT3G18080	down	-2.17012	0.000267582	-1.68371	0.00437028
AT3G10060	down	-1.69572	3.64e-05	-2.15745	5.55e-08
AT4G24670	down	-2.0707	0.0366504	-1.7781	0.0457886
AT3G49290	down	-2.39624	2.44e-05	-1.45064	0.00121938
AT1G50575	down	-1.86731	0.000202369	-1.97247	2.34e-05
AT5G06340	down	-1.65413	2.44e-06	-2.18424	1.25e-10
AT4G39970	down	-1.47548	0.000161726	-2.36122	3.93e-10
AT1G75800	down	-2.27573	1.17e-09	-1.55151	3.35e-06
AT1G71695	down	-1.9447	0.00126684	-1.88214	0.001359
AT4G24540	down	-2.20893	0.000799888	-1.61642	0.0113692
AT1G29070	down	-1.74297	0.000376613	-2.0768	1.19e-05
AT4G12390	down	-1.522	0.00927337	-2.29729	3.76e-05
AT1G20020	down	-1.67917	9.37e-06	-2.13586	5.64e-09
AT1G60810	down	-1.91737	0.0311529	-1.89549	0.0205576
AT3G14110	down	-1.77765	4.68e-05	-2.0333	1.58e-06
AT1G18415	down	-2.09041	0.00348701	-1.711	0.00854901
AT5G38520	down	-1.87593	6.03e-07	-1.9249	1.07e-07
AT1G32080	down	-2.08808	3.7e-09	-1.71134	8.05e-07
AT3G61870	down	-1.86867	7.92e-06	-1.92154	2.52e-06
AT3G14150	down	-2.21304	0.000298938	-1.57639	0.0021884
AT2G26870	down	-1.98389	0.00107279	-1.80501	0.000571898
AT1G32060	down	-1.66285	0.000200496	-2.12216	8.45e-07
AT2G42690	down	-1.48243	0.00110469	-2.29993	1.12e-07
AT1G25230	down	-1.48129	0.0100208	-2.29855	2.83e-05
AT3G19480	down	-1.53841	0.000188246	-2.22897	3.45e-08
AT4G24770	down	-1.74742	2.47e-07	-2.01667	8.72e-10
AT1G75690	down	-1.55781	0.0012945	-2.20318	1.99e-06
AT2G05812	down	-2.09231	0.000323881	-1.66505	0.000651752
AT4G02770	down	-1.83002	0.000165083	-1.92682	4.92e-05
AT3G56940	down	-1.83886	2.43e-07	-1.90824	4.37e-08
AT3G53130	down	-1.94452	1.08e-06	-1.80024	3.05e-07
AT1G18730	down	-1.62414	8.4e-06	-2.11908	1.9e-09
AT4G31850	down	-2.2299	1.22e-07	-1.50992	3.94e-06
ATCG01100	down	-1.33505	0.00473003	-2.40246	1.16e-07
AT1G75280	down	-2.00701	0.00021293	-1.71792	0.0012132
AT5G43880	down	-2.40495	1.72e-05	-1.31157	0.00239889
AT3G26310	down	-1.82444	0.000461924	-1.88969	5.4e-05
AT3G06868	down	-1.53202	0.0119293	-2.18093	0.000223963
AT3G05900	down	-1.86867	0.000278192	-1.84348	0.000164951
AT2G28450	down	-2.23136	0.000113566	-1.4773	0.00331339
AT1G78630	down	-1.82841	4.17e-05	-1.87703	1.7e-05
AT3G54930	down	-1.88469	0.0289848	-1.81953	0.0133958
AT5G46580	down	-2.362	1.76e-08	-1.34145	0.000744469
AT3G14940	down	-1.78337	0.0270534	-1.91817	0.00873568
AT5G60920	down	-1.47053	0.00137367	-2.2307	3.51e-07
AT5G18590	down	-1.59398	0.000880689	-2.10464	5.32e-06
AT5G53500	down	-2.07641	0.000241412	-1.61738	0.00157872
AT5G04140	down	-1.53113	1.9e-05	-2.15725	3.88e-10
AT5G61660	down	-1.31723	0.00938325	-2.37011	6.32e-07
AT3G12780	down	-1.51618	3.1e-07	-2.16563	2.67e-14
AT2G36490	down	-2.10067	7.96e-06	-1.57848	0.000219015
AT1G38131	down	-1.6981	0.004355	-1.98068	0.000378619
AT1G21060	down	-2.39613	0.00271312	-1.28166	0.0355148
AT1G55360	down	-2.08745	0.000168391	-1.58755	0.00385683
AT2G43030	down	-1.91859	4.83e-06	-1.75251	2.23e-05
AT5G19940	down	-1.60206	2.74e-07	-2.06435	6.86e-12
AT1G53800	down	-2.32583	4.55e-05	-1.3403	0.0070082
AT2G33060	down	-1.44316	0.0405523	-2.21941	0.00110148
AT4G28706	down	-1.27925	0.0228887	-2.38166	1.42e-05
AT1G38065	down	-1.68861	0.00436585	-1.97027	0.000374793
AT5G49730	down	-1.53009	0.0144262	-2.12458	0.000341199
AT5G13000	down	-2.13263	3.72e-06	-1.51834	0.000350522
AT3G56650	down	-1.36513	5.05e-07	-2.2823	8.09e-17
AT5G13980	down	-1.88522	4.82e-05	-1.75972	7.12e-05
AT3G63410	down	-1.89567	6.03e-08	-1.74495	3.62e-07
AT3G27230	down	-1.79783	8.29e-06	-1.84193	1.59e-06
AT5G05170	down	-1.60162	1.33e-05	-2.03698	1.02e-08
AT2G39730	down	-1.59743	0.000396619	-2.03461	2.81e-06
AT1G72640	down	-1.73698	8.99e-08	-1.8933	9.37e-10
AT4G28750	down	-1.44552	0.000350725	-2.18122	1.53e-08
AT1G31920	down	-1.74177	7.25e-05	-1.88188	4.63e-06
AT2G29510	down	-1.90031	4.54e-06	-1.71806	1.24e-05
AT3G06035	down	-1.98733	0.0156867	-1.62645	0.0431901
AT3G63490	down	-1.80477	2.12e-07	-1.808	1.05e-07
AT5G01530	down	-1.69311	1.2e-06	-1.9174	1.65e-08
AT5G15740	down	-2.02876	0.00604441	-1.57756	0.0242167
AT5G09660	down	-1.72875	5.55e-06	-1.87346	4.45e-07
AT1G65230	down	-1.89034	4.53e-06	-1.70808	1.63e-05
AT2G04280	down	-2.10255	2.37e-07	-1.49511	0.000118273
AT1G49975	down	-1.7692	0.000155324	-1.827	5.02e-05
AT3G28130	down	-1.94016	0.00288256	-1.65214	0.00487186
AT2G22830	down	-1.85994	0.0499361	-1.72788	0.0295323
AT1G74880	down	-1.55024	0.0012289	-2.03688	9.7e-06
AT5G67130	down	-1.5578	0.000127396	-2.02678	2.22e-07
AT1G10120	down	-1.56256	0.000106972	-2.01817	2.15e-07
AT1G69780	down	-1.17135	0.0317029	-2.40905	4.36e-06
AT1G50900	down	-1.52927	0.000384128	-2.04899	7.37e-07
AT2G11225	down	-1.87267	0.00452311	-1.69653	0.00354879
AT4G38210	down	-2.00321	0.0113113	-1.56075	0.0255116
AT4G04640	down	-1.67028	6.89e-06	-1.88896	1.78e-07
AT2G33860	down	-1.69822	0.00160078	-1.86036	0.000310974
AT2G35780	down	-2.04187	4.66e-06	-1.51351	0.000471669
AT5G45280	down	-2.0882	0.000534306	-1.46455	0.01112
AT5G14320	down	-1.56301	2.03e-05	-1.9897	2.01e-08
AT3G29185	down	-2.03673	1.35e-07	-1.51396	2.26e-05
AT5G66570	down	-1.21456	0.000510124	-2.33178	1.07e-12
AT5G11450	down	-1.64041	0.000165306	-1.90154	6.53e-06
AT2G02790	down	-2.24495	1.16e-05	-1.29438	0.00359973
AT1G22430	down	-1.57041	0.000363892	-1.96845	3.3e-06
AT5G51110	down	-1.58129	5.72e-06	-1.95714	6.7e-09
AT5G14210	down	-1.53571	0.046816	-2.00202	0.00630845
AT5G42765	down	-1.74572	1.04e-07	-1.78571	6.92e-09
AT4G25960	down	-2.0001	8.27e-06	-1.53072	0.000331231
AT3G03780	down	-2.19765	9.16e-06	-1.33083	0.0081961
AT2G47160	down	-1.65562	0.0012032	-1.86674	0.000124568
AT3G60630	down	-1.91436	3.59e-06	-1.60455	2.17e-05
AT3G47070	down	-1.37462	0.00339701	-2.13756	1.46e-06
AT1G74160	down	-1.94804	0.000540689	-1.55279	0.00289762
AT5G24300	down	-2.32992	1.86e-12	-1.1679	0.000160575
AT4G31210	down	-2.42631	1.59e-06	-1.07123	0.0170771
AT2G48070	down	-1.45865	6.81e-06	-2.03846	7.6e-11
AT5G19260	down	-1.82431	0.0217075	-1.65103	0.024347
AT3G16140	down	-1.34147	0.00262521	-2.13365	4.03e-07
AT3G27850	down	-1.67591	1.96e-05	-1.79801	2.69e-06
AT2G22330	down	-1.49777	0.034777	-1.9725	0.00336185
AT1G60000	down	-1.78579	1.44e-05	-1.68	3.06e-05
AT2G23600	down	-1.01728	0.045947	-2.44722	1.4e-07
AT3G61820	down	-1.92075	0.00945598	-1.54049	0.0293261
AT1G54200	down	-1.95266	0.021298	-1.50582	0.047889
AT1G14380	down	-1.96446	3.97e-05	-1.49316	0.000650475
AT3G57030	down	-1.35366	0.000745337	-2.09956	6.06e-08
AT5G61340	down	-1.2312	0.0403608	-2.21036	0.000127072
AT2G33855	down	-1.55752	1.77e-06	-1.8836	2.27e-09
AT1G47580	down	-1.91215	0.000955624	-1.52775	0.00363371
AT2G44160	down	-1.91361	1.07e-05	-1.52182	0.000382004
AT2G24090	down	-1.58303	0.000690292	-1.85235	3.99e-05
AT3G22104	down	-1.65376	0.000256333	-1.77964	3.26e-05
AT3G01510	down	-1.83479	2.41e-05	-1.59627	1.35e-05
AT3G49500	down	-1.7392	0.000513971	-1.68933	0.000317512
AT4G37095	down	-1.91102	0.0150722	-1.51691	0.0243547
AT3G03630	down	-1.88116	0.01763	-1.54296	0.0281926
AT5G14450	down	-2.28153	0.000384843	-1.14212	0.0270885
AT2G32400	down	-2.05476	0.00186953	-1.36724	0.0112981
AT2G35155	down	-2.04047	3.03e-05	-1.38146	0.000656599
AT1G30530	down	-2.01526	0.00424173	-1.40619	0.0452552
AT1G14280	down	-1.14862	0.0175709	-2.26598	9.65e-07
AT3G54910	down	-2.05347	0.00449284	-1.34619	0.0246642
AT1G02050	down	-1.64381	0.0198557	-1.75533	0.00759906
AT4G35920	down	-1.9361	0.000989534	-1.46297	0.00620589
AT5G13650	down	-1.80101	7.55e-10	-1.59787	2.71e-08
AT3G52720	down	-1.87655	0.000950435	-1.51951	0.00680972
AT5G07020	down	-1.76648	3.8e-10	-1.62115	3.68e-09
AT2G24060	down	-1.8604	1.29e-06	-1.52683	3.68e-05
AT1G59840	down	-1.91752	5.99e-05	-1.46352	0.000680833
AT4G03150	down	-1.69596	3.28e-05	-1.67971	1.51e-05
AT1G27480	down	-1.56825	0.000205632	-1.80519	9.18e-06
AT3G52840	down	-2.10076	1.04e-07	-1.26591	0.000299935
AT1G78040	down	-1.06663	0.0131577	-2.29701	6.41e-09
AT4G38690	down	-2.14354	2.54e-05	-1.21282	0.0123911
AT3G15190	down	-1.56631	0.000362219	-1.78505	2.74e-05
AT5G13510	down	-1.59893	2.08e-05	-1.7499	1.7e-06
AT1G60800	down	-1.47663	0.000596825	-1.86992	5.93e-06
AT5G46800	down	-1.33793	2.53e-05	-2.00638	4.92e-11
ATCG00550	down	-1.26247	0.000134216	-2.08048	3.69e-11
AT2G40480	down	-1.68953	0.0354155	-1.65315	0.0238716
AT3G48730	down	-1.9694	7.4e-05	-1.37103	0.00535965
AT1G69420	down	-1.99043	9.05e-05	-1.34517	0.00606677
AT2G03750	down	-1.83713	9.79e-07	-1.49679	4.5e-05
AT5G04360	down	-1.6136	0.00660552	-1.72003	0.00155839
AT5G62960	down	-1.63266	0.0422031	-1.69846	0.0183902
AT1G55130	down	-1.463	0.00247555	-1.85303	5.83e-05
AT5G01620	down	-1.61465	0.00985734	-1.69846	0.00287188
AT3G03710	down	-1.81028	7.65e-05	-1.49923	0.000709248
AT4G37930	down	-1.72855	5.84e-07	-1.58011	3.47e-06
AT3G09035	down	-1.29059	0.00960421	-2.01768	3.01e-05
ATCG00570	down	-1.40682	0.00341047	-1.89922	3.5e-05
AT4G09640	down	-2.26785	1.5e-05	-1.03671	0.00439654
AT1G01610	down	-2.00107	0.00012674	-1.30317	0.0125499
AT3G02870	down	-1.67364	3.43e-05	-1.62894	2.92e-05
AT2G22250	down	-1.62601	0.00530517	-1.67638	0.00230734
AT2G32640	down	-1.87597	0.00146641	-1.42626	0.00607849
AT1G09160	down	-1.73625	4.44e-05	-1.56273	4.31e-05
AT3G53750	down	-1.90304	0.00148226	-1.38746	0.0167933
AT1G09060	down	-1.55364	2.8e-06	-1.73609	1.86e-08
AT1G29840	down	-1.40212	0.00348701	-1.88411	3.88e-05
AT1G76405	down	-1.39032	0.0025842	-1.89372	1.87e-05
AT4G00180	down	-1.99676	0.000297151	-1.28604	0.015156
AT2G47450	down	-1.56926	4.17e-05	-1.69903	5.26e-06
AT2G38695	down	-1.86239	0.0228712	-1.40417	0.0272596
AT3G04860	down	-1.69875	0.00257082	-1.56553	0.00240752
AT3G60740	down	-1.73019	0.000227449	-1.5309	0.000152727
AT1G15290	down	-1.99256	1.75e-08	-1.26736	0.000282991
AT3G61080	down	-2.16256	1.61e-06	-1.09676	0.00686916
AT2G28605	down	-1.56498	0.00101098	-1.69106	0.000233326
AT2G22125	down	-1.51029	4.34e-05	-1.74253	9.53e-07
AT1G65295	down	-1.45754	0.00190716	-1.79313	6.93e-05
AT1G74370	down	-1.6896	0.000327966	-1.56044	0.000466823
AT5G66005	down	-1.96364	0.00290099	-1.28424	0.0341135
AT3G07210	down	-1.85695	0.0220706	-1.38493	0.0470219
AT4G22756	down	-1.4959	0.0014727	-1.74558	9.8e-05
AT1G65960	down	-1.39291	0.000996798	-1.84068	5.76e-06
AT1G11580	down	-1.40961	0.0227298	-1.82232	0.00195009
AT4G01050	down	-1.5631	7.5e-06	-1.6648	1.01e-06
AT2G37630	down	-1.39872	0.0024078	-1.82805	3.43e-05
AT1G68010	down	-1.78753	1.91e-05	-1.42892	0.00061379
AT1G13380	down	-1.35955	0.000958241	-1.85453	2.68e-06
AT2G32180	down	-1.92646	0.00305312	-1.28681	0.0431624
AT1G60260	down	-1.36439	0.00125258	-1.84719	5.23e-06
AT2G43910	down	-1.0776	0.00792686	-2.13311	1.75e-08
AT5G48790	down	-1.13186	0.000958479	-2.07428	2.85e-10
AT4G10470	down	-1.54445	0.000309242	-1.66075	2.78e-05
AT3G53850	down	-1.43526	0.00792686	-1.76781	0.000574714
AT4G10030	down	-1.82939	0.00146485	-1.36821	0.00604844
AT5G09820	down	-1.07323	0.0374302	-2.12073	1.3e-05
AT4G04435	down	-1.4866	0.00101708	-1.7064	4.38e-05
AT1G78210	down	-1.35074	0.00316647	-1.82879	2.9e-05
AT5G65710	down	-1.57975	0.0242423	-1.59819	0.00926903
AT1G44920	down	-1.54	2.57e-06	-1.63424	1.9e-07
AT4G32570	down	-1.48662	0.00857533	-1.68091	0.0019248
ATCG00620	down	-1.65316	0.0183547	-1.51326	0.0156178
AT2G37080	down	-1.6914	0.0232612	-1.47359	0.0376756
AT2G35410	down	-1.53026	8e-06	-1.63193	6.25e-07
AT1G02150	down	-1.96216	2.84e-05	-1.19377	0.00886297
AT2G43530	down	-1.58976	0.00543913	-1.56329	0.00498435
AT4G37480	down	-1.76594	0.0115191	-1.3773	0.0157426
AT1G03600	down	-1.47166	0.000257457	-1.6697	1.89e-05
AT4G30500	down	-1.47883	0.0165701	-1.66054	0.00372715
AT5G37790	down	-1.61859	0.00762078	-1.51822	0.00534271
AT5G07090	down	-1.78021	0.000166917	-1.35539	0.00422393
AT5G35630	down	-1.1298	0.0199561	-2.00509	8.58e-06
AT1G54780	down	-1.53396	0.00088536	-1.59847	0.000382004
AT4G14540	down	-1.63335	0.000390942	-1.49789	0.000821791
AT3G54210	down	-1.46177	0.000129246	-1.66885	6.78e-06
AT4G02530	down	-1.61083	1.42e-05	-1.51601	3.05e-05
AT3G12930	down	-1.8391	4.56e-06	-1.28762	0.000843604
AT3G02690	down	-1.35879	0.000219726	-1.76731	5.7e-07
AT3G56130	down	-1.45786	0.028321	-1.66462	0.0086344
AT1G05190	down	-1.14724	0.00240181	-1.9696	3.36e-08
AT1G62750	down	-1.48601	2.68e-06	-1.62766	1.29e-07
AT3G16060	down	-1.58602	4.73e-06	-1.52682	2.77e-06
AT1G32900	down	-1.67969	0.0195209	-1.43098	0.0446652
AT3G47650	down	-1.43591	6.18e-05	-1.67353	1.51e-06
AT1G33040	down	-1.85945	1.11e-05	-1.24922	0.00257862
AT1G67700	down	-1.32386	2.07e-05	-1.78176	2.68e-09
AT4G03415	down	-1.80299	1.75e-06	-1.29725	0.000157862
AT3G15530	down	-1.4589	0.002659	-1.64054	0.000397202
AT2G05920	down	-1.96651	2.02e-06	-1.13229	0.00621266
AT5G18170	down	-1.43067	8.6e-05	-1.66767	1.69e-06
AT1G78060	down	-1.89707	0.000166015	-1.19765	0.0100293
AT2G34420	down	-1.36721	7.24e-06	-1.72265	5.12e-09
AT3G06550	down	-1.49089	0.00174953	-1.5936	0.000537692
AT5G54569	down	-1.63228	0.0241964	-1.44058	0.027039
AT1G07180	down	-1.47466	1.28e-05	-1.59759	8.79e-07
AT2G40960	down	-1.49157	0.0012289	-1.57761	0.000256541
AT4G23740	down	-1.53422	0.0029334	-1.53281	0.00184888
AT3G52940	down	-1.89193	0.000584598	-1.16625	0.0245563
AT2G33450	down	-1.42813	0.00174176	-1.62977	0.000219656
AT5G11070	down	-1.36688	0.0421777	-1.68983	0.00831296
AT1G76110	down	-1.45416	0.00228958	-1.60169	0.000485579
AT4G39460	down	-1.56382	0.000158497	-1.48327	0.000228175
AT1G71790	down	-1.65535	0.00284912	-1.38827	0.00582294
AT1G53300	down	-1.33925	0.00516217	-1.70334	0.000192603
AT5G63410	down	-1.33977	0.00476741	-1.70275	0.000162876
AT1G12750	down	-1.25707	0.0188339	-1.78527	0.000454921
AT1G72480	down	-1.15069	0.00803613	-1.8891	4.76e-06
AT5G60450	down	-1.99795	7.83e-05	-1.04159	0.0362152
AT5G05740	down	-1.89143	0.000106032	-1.13617	0.0140874
AT2G19940	down	-1.55529	4.67e-05	-1.46993	6.15e-05
AT5G16540	down	-1.29232	5.93e-07	-1.73051	2.99e-12
AT4G04340	down	-1.50047	2.47e-05	-1.51126	1.05e-05
AT3G23700	down	-1.67654	1.31e-05	-1.33455	0.000283099
AT5G63470	down	-1.43324	0.00701653	-1.57582	0.0017422
AT5G08390	down	-1.43396	0.0051107	-1.57248	0.000822013
AT3G55130	down	-1.35532	0.009749	-1.65076	0.00100792
AT2G36910	down	-1.94432	1.16e-06	-1.06141	0.00648543
AT5G20270	down	-1.76578	0.00187031	-1.23723	0.0264799
AT3G51820	down	-1.48743	5.26e-05	-1.50663	2.68e-05
AT5G44600	down	-1.9429	0.000458743	-1.0475	0.0312435
AT3G25140	down	-1.29083	0.00196536	-1.69839	2.09e-05
AT1G76450	down	-1.30175	4.09e-05	-1.68701	3.54e-08
AT5G54180	down	-1.63478	0.000404289	-1.35369	0.000686685
AT1G67050	down	-1.34674	0.00920011	-1.64143	0.00084734
AT1G68130	down	-1.299	0.00187031	-1.68744	2.07e-05
AT5G58090	down	-1.51295	0.000250831	-1.46938	0.000218196
AT4G30825	down	-1.30045	0.000155356	-1.68175	2.41e-07
AT5G26880	down	-1.48422	0.00086144	-1.49795	0.000547026
AT4G27060	down	-1.3655	0.000917247	-1.60554	4.34e-05
AT1G55140	down	-1.46115	0.0012547	-1.50947	0.000516616
AT1G17350	down	-1.35424	0.00920923	-1.61421	0.000857035
AT5G20720	down	-1.60652	0.000705229	-1.36178	0.00383683
AT1G70100	down	-1.59414	0.00112115	-1.3709	0.0026766
AT4G15630	down	-1.94689	0.000111532	-1.01393	0.0462926
AT1G49010	down	-1.3347	0.009749	-1.61898	0.000987813
AT4G31270	down	-1.24962	0.0120254	-1.70365	0.000308071
AT3G24040	down	-1.36853	0.000308346	-1.58323	7.14e-06
AT1G44446	down	-1.44336	4.68e-09	-1.49968	3.5e-10
AT4G03280	down	-1.37539	1.46e-06	-1.56696	1.71e-08
AT5G51820	down	-1.86154	3.23e-07	-1.07964	0.00155646
AT2G28470	down	-1.56995	0.0162115	-1.3686	0.0302256
AT5G19290	down	-1.67664	0.00164286	-1.26081	0.014837
AT2G46225	down	-1.59894	0.000526247	-1.33503	0.00171982
AT4G17360	down	-1.62296	0.0116145	-1.30257	0.0148941
AT1G17220	down	-1.67681	7.04e-11	-1.24739	3.61e-07
AT5G26910	down	-1.55922	0.00203675	-1.36493	0.00296927
AT3G27830	down	-1.34716	0.000150817	-1.57578	4.84e-06
AT1G50710	down	-1.26596	0.00559946	-1.6549	0.00012632
AT1G22060	down	-1.63203	8.32e-05	-1.27789	0.000504184
AT1G23310	down	-1.10687	0.0032206	-1.80126	3.6e-07
AT3G58800	down	-1.51713	0.0384215	-1.37909	0.0323043
AT4G16340	down	-1.63084	0.00271312	-1.26225	0.0145467
AT4G16570	down	-1.3502	0.0408585	-1.53703	0.00913473
AT2G02740	down	-1.68499	0.0031407	-1.20124	0.0295356
AT3G59040	down	-1.83492	0.000166535	-1.04833	0.0284381
AT4G32330	down	-1.49347	5.22e-05	-1.38602	0.000105024
AT1G68590	down	-1.4845	0.00241485	-1.39113	0.00379637
AT2G27680	down	-1.633	3.71e-09	-1.24084	2.85e-06
AT1G73530	down	-1.03714	0.00072318	-1.83552	4.44e-10
AT5G52780	down	-1.52816	0.00461569	-1.34354	0.0115164
AT4G28660	down	-1.34682	0.00352844	-1.51969	0.000651752
AT2G35450	down	-1.44527	0.000226497	-1.41781	6.7e-05
AT4G17600	down	-1.30613	0.00604493	-1.55186	0.000684739
AT2G33810	down	-1.36283	0.005115	-1.49273	0.0012582
AT2G40815	down	-1.79949	0.00232478	-1.05596	0.0386663
AT5G62690	down	-1.76476	2.86e-05	-1.09023	0.0108079
AT3G16950	down	-1.5808	0.0157695	-1.27273	0.0426791
AT5G01090	down	-1.30292	0.000168391	-1.5473	3.08e-06
AT1G74730	down	-1.30514	0.000245155	-1.5432	7.27e-06
AT3G14415	down	-1.44595	8.23e-05	-1.39824	0.000107825
AT3G09050	down	-1.5651	2.44e-05	-1.27906	0.000166717
AT3G23780	down	-1.37891	9.18e-05	-1.4634	1.06e-05
AT5G15050	down	-1.08181	0.0370112	-1.75949	0.000345338
AT1G15410	down	-1.22111	0.0229673	-1.61872	0.00132146
AT5G49020	down	-1.49539	0.000460657	-1.33771	0.000656282
AT1G66980	down	-1.17025	0.000405798	-1.65953	1.74e-07
ATCG00150	down	-1.01657	0.027328	-1.81237	2.56e-05
AT1G25440	down	-1.13691	0.0367715	-1.69068	0.000934068
ATCG00040	down	-1.40738	0.00746554	-1.41976	0.00556702
AT5G66190	down	-1.45004	2.81e-06	-1.3763	6.14e-06
AT5G14410	down	-1.74202	0.00189038	-1.08281	0.042707
AT3G05625	down	-1.59617	0.00121259	-1.22715	0.00522746
AT1G68540	down	-1.27408	0.0197498	-1.54469	0.00273009
AT5G36930	down	-1.05098	0.0389814	-1.76665	0.00023589
AT3G59780	down	-1.58507	0.00107532	-1.22219	0.0106695
AT3G55800	down	-1.39901	0.00158367	-1.40541	0.00117775
AT4G21210	down	-1.23072	0.00333032	-1.57259	8.88e-05
AT1G05385	down	-1.58154	1.14e-06	-1.22133	5.52e-05
AT4G10770	down	-1.37175	0.0207553	-1.42953	0.0122954
AT3G13690	down	-1.18411	0.016856	-1.60993	0.000581984
AT3G59970	down	-1.36305	0.0055894	-1.42501	0.0028361
AT5G27560	down	-1.3287	3.27e-06	-1.45339	6.66e-08
AT4G02500	down	-1.30654	0.000326826	-1.46807	2.86e-05
AT1G56500	down	-1.26968	0.000656991	-1.49755	2.7e-05
AT4G17190	down	-1.62917	0.00301465	-1.13461	0.0287211
AT3G60380	down	-1.53357	0.00107674	-1.228	0.00295532
AT3G20680	down	-1.13436	0.00968008	-1.619	9.93e-05
AT1G21350	down	-1.47037	1.73e-05	-1.28166	6.41e-05
AT5G16390	down	-1.50573	0.000877639	-1.24576	0.00535113
AT5G17670	down	-1.25222	0.000345382	-1.48828	9.16e-06
AT1G02280	down	-1.37388	0.0213283	-1.36574	0.0186167
AT1G26650	down	-1.2228	0.00175085	-1.50431	4.88e-05
AT1G10030	down	-1.01342	0.0438042	-1.71343	0.000326051
AT2G03420	down	-1.41424	0.00344485	-1.3099	0.00540303
AT4G22890	down	-1.21146	0.000935825	-1.51216	1.74e-05
AT1G01430	down	-1.53015	0.00424962	-1.19014	0.0245563
AT5G61410	down	-1.09701	3.87e-09	-1.62288	1.36e-19
AT3G46550	down	-1.13745	0.0277961	-1.58122	0.00120035
AT1G44575	down	-1.50852	0.000330367	-1.20442	0.00414434
AT5G16810	down	-1.52608	2.38e-05	-1.18117	0.000109739
AT3G60370	down	-1.15379	0.00305312	-1.54969	2.93e-05
AT3G24770	down	-1.36267	0.00843635	-1.34029	0.00731634
AT5G40830	down	-1.29059	0.0231451	-1.40891	0.00887165
AT5G57800	down	-1.6149	7.87e-06	-1.08038	0.00244073
AT1G56190	down	-1.05018	0.00414614	-1.64224	2.13e-06
AT1G72090	down	-1.68961	8.32e-05	-1.00172	0.0103077
AT3G52380	down	-1.6278	0.000447472	-1.055	0.0240696
ATCG00340	down	-1.51109	0.00418886	-1.1702	0.0270623
AT2G20890	down	-1.27384	2.17e-05	-1.40599	1.43e-06
AT1G28440	down	-1.53515	0.000704296	-1.13964	0.0099215
AT1G24610	down	-1.31993	0.000558021	-1.35481	7.93e-05
AT4G34610	down	-1.5727	0.00166645	-1.09761	0.0165918
AT5G47435	down	-1.0243	0.0088267	-1.64501	7.98e-06
AT1G08390	down	-1.05524	0.00578012	-1.61031	1.04e-05
AT5G57170	down	-1.49408	0.00302588	-1.16575	0.0153568
AT5G17870	down	-1.2303	0.000535702	-1.42952	3.19e-05
AT1G11280	down	-1.30614	0.0071484	-1.353	0.00219646
AT2G39930	down	-1.43552	0.000112129	-1.22183	0.00038014
AT5G60400	down	-1.02552	0.0404625	-1.62707	0.000502315
AT3G45443	down	-1.24223	0.0190297	-1.40815	0.00466212
AT2G22670	down	-1.42572	0.00154108	-1.22188	0.00585364
AT3G25560	down	-1.59428	0.0029834	-1.05323	0.0224622
AT2G32720	down	-1.40807	0.018015	-1.23894	0.0332904
AT5G08720	down	-1.40283	0.000318197	-1.24392	0.000389983
AT2G47590	down	-1.476	7.78e-06	-1.16287	0.000315477
AT2G23670	down	-1.42289	0.000196713	-1.21528	0.0012932
AT5G17880	down	-1.16089	0.00297436	-1.47694	6.05e-05
AT5G53900	down	-1.47315	0.00587505	-1.15423	0.0251106
AT2G42190	down	-1.23916	0.00194253	-1.38748	0.000315469
AT5G36950	down	-1.2212	0.0320682	-1.40469	0.00724275
AT2G02500	down	-1.01218	0.0437121	-1.61055	0.000673598
AT3G14600	down	-1.21566	0.00915593	-1.40197	0.00181681
AT5G17710	down	-1.42178	0.000554321	-1.19468	0.00333624
AT5G27400	down	-1.42033	0.0178376	-1.19548	0.0228625
AT4G22755	down	-1.37964	0.0024099	-1.23311	0.00529653
AT2G25080	down	-1.17566	0.00891888	-1.43068	0.000905617
AT2G01070	down	-1.21792	0.000634802	-1.38624	3.01e-05
AT1G31550	down	-1.07439	0.0304901	-1.52558	0.00111254
AT5G57710	down	-1.4476	0.000762542	-1.1494	0.00644058
AT2G18710	down	-1.22683	9.1e-05	-1.36943	5.41e-06
AT5G10540	down	-1.36336	0.00462991	-1.23211	0.00810084
AT3G44150	down	-1.30119	0.00233663	-1.29238	0.00135585
AT1G32550	down	-1.11736	0.00927913	-1.47431	0.000299932
AT1G32220	down	-1.25984	0.00250549	-1.3302	0.000927492
AT3G23750	down	-1.30635	0.000181734	-1.27675	0.000128275
AT1G62780	down	-1.33339	0.0015702	-1.2489	0.00247895
AT1G79850	down	-1.27674	0.00534734	-1.30497	0.00348903
AT5G01920	down	-1.30555	0.000266078	-1.27338	0.000202284
AT5G19390	down	-1.46105	2.12e-05	-1.11754	0.000355651
AT2G26730	down	-1.03165	0.0252875	-1.5417	0.000388352
AT1G49760	down	-1.54673	0.000736862	-1.02598	0.0253905
AT5G24314	down	-1.25242	0.00139263	-1.31967	0.000482011
AT1G21590	down	-1.19149	0.000708023	-1.37905	4.5e-05
AT1G13640	down	-1.47666	0.00305329	-1.093	0.0275994
AT5G24000	down	-1.36233	0.0130804	-1.20425	0.0122175
AT2G20810	down	-1.17043	0.00435267	-1.3906	0.000273993
AT3G05000	down	-1.19005	4.39e-05	-1.36747	8.48e-07
AT4G16800	down	-1.24638	0.0363097	-1.30959	0.0171603
AT4G19100	down	-1.10741	0.0226499	-1.44811	0.00159334
AT1G29900	down	-1.45782	0.00107126	-1.09467	0.0134855
AT1G64980	down	-1.02723	0.00717471	-1.52517	2.47e-05
AT1G71500	down	-1.23126	3.89e-05	-1.31873	5.9e-06
AT3G05100	down	-1.17582	0.000202909	-1.37377	4.69e-06
AT3G03770	down	-1.31789	0.012375	-1.22949	0.0155323
AT1G04183	down	-1.18258	0.00482486	-1.36216	0.000643636
AT1G07070	down	-1.32685	0.0254212	-1.21686	0.0324354
AT2G04530	down	-1.30651	0.0129448	-1.23068	0.0114247
AT2G32650	down	-1.50424	0.00392613	-1.03146	0.0479015
AT5G13770	down	-1.22965	0.000460861	-1.29737	0.000133904
AT2G21280	down	-1.18196	0.000396012	-1.33917	2.76e-05
AT4G20360	down	-1.09007	0.00379206	-1.42664	7.4e-05
AT5G40950	down	-1.04919	0.00853216	-1.46624	0.000106636
AT4G02820	down	-1.27528	0.027031	-1.23142	0.0237893
AT2G35110	down	-1.23892	0.000128702	-1.25996	2.29e-05
AT4G01570	down	-1.28237	0.00436859	-1.21071	0.00222126
AT5G13290	down	-1.17759	0.0486474	-1.31518	0.0146394
AT1G49600	down	-1.21395	0.00912743	-1.27603	0.00459796
AT4G02630	down	-1.1631	0.00387036	-1.32424	0.000485579
AT5G12150	down	-1.25331	0.00170698	-1.23141	0.00147422
AT1G51630	down	-1.2574	0.00107126	-1.22628	0.000882687
AT5G14220	down	-1.22042	0.00324556	-1.26123	0.000577207
AT4G18030	down	-1.09477	0.00987019	-1.38532	0.000624964
AT1G18000	down	-1.2028	0.0105429	-1.27687	0.00408509
AT3G19720	down	-1.05335	0.00877905	-1.42631	0.000188914
AT1G10180	down	-1.4295	0.00234367	-1.04968	0.00863662
AT1G72180	down	-1.19181	0.0137544	-1.28624	0.00547434
AT1G10600	down	-1.33217	0.00233529	-1.14534	0.00688087
AT3G07510	down	-1.40552	0.00447268	-1.068	0.0198144
AT4G18460	down	-1.43595	0.0201288	-1.03119	0.0472381
AT3G26710	down	-1.18127	0.000215213	-1.2844	3.03e-05
AT3G56010	down	-1.00573	0.000623252	-1.45514	2.15e-07
AT2G21960	down	-1.24815	1.57e-05	-1.20864	1.41e-05
AT2G40760	down	-1.41463	0.00127871	-1.04008	0.00722112
AT1G08350	down	-1.11764	0.00351145	-1.33548	0.000148855
AT3G05750	down	-1.33533	0.0329403	-1.11117	0.0465979
AT3G04790	down	-1.03846	0.0122248	-1.40305	0.000362359
AT4G09670	down	-1.43754	1.75e-08	-1.00081	3.54e-05
AT3G45030	down	-1.12214	0.0330985	-1.31446	0.0091472
AT1G76050	down	-1.20072	0.000116622	-1.23577	1.05e-05
AT5G36120	down	-1.28092	0.00585309	-1.15421	0.00962597
AT5G02180	down	-1.20988	0.0197498	-1.21668	0.0125428
AT1G12000	down	-1.16945	0.0465657	-1.25546	0.0255663
AT2G44440	down	-1.09267	0.0285205	-1.33161	0.00320174
AT2G39570	down	-1.12285	0.0288222	-1.30099	0.00817196
AT5G21430	down	-1.38523	0.00165181	-1.03786	0.0174805
AT1G69850	down	-1.16579	0.0101554	-1.24998	0.00394762
AT5G04560	down	-1.32283	3.9e-05	-1.09078	0.000315469
AT1G08660	down	-1.27174	0.000836364	-1.14175	0.00127804
AT2G35500	down	-1.3484	0.00502204	-1.06114	0.0206039
AT1G18010	down	-1.16763	0.0126063	-1.24156	0.00502089
AT1G08200	down	-1.10725	0.00325167	-1.29961	0.000336814
AT1G51110	down	-1.35422	0.000371626	-1.04534	0.00386721
AT5G14660	down	-1.17013	0.00181028	-1.22826	0.000572935
AT1G10760	down	-1.14857	0.0135202	-1.24975	0.00519411
AT1G27190	down	-1.29791	0.00072318	-1.09634	0.00281713
AT4G22160	down	-1.1011	0.00714814	-1.28858	0.000730261
AT4G36810	down	-1.00172	0.00140219	-1.38373	3.81e-06
AT2G36430	down	-1.32905	0.00129411	-1.05489	0.00576899
AT5G53860	down	-1.35992	0.000300545	-1.02226	0.00518604
AT2G25300	down	-1.10621	0.0164508	-1.26941	0.00223604
AT5G12470	down	-1.06249	1.31e-05	-1.3127	2.38e-08
AT3G49470	down	-1.0938	0.000679897	-1.26951	4.17e-05
AT4G05040	down	-1.28489	0.00806428	-1.07723	0.0168909
AT3G16520	down	-1.25096	0.00266188	-1.11084	0.00636606
AT3G48425	down	-1.11834	0.045102	-1.2434	0.0136601
AT3G48820	down	-1.07071	0.000526247	-1.29047	5.18e-06
AT1G17455	down	-1.19857	0.00609148	-1.15379	0.00540937
AT5G21222	down	-1.17002	0.00643552	-1.17769	0.00408509
AT4G14830	down	-1.10519	0.0135989	-1.23816	0.00306847
AT5G64740	down	-1.00978	0.0132158	-1.33237	0.00057356
AT4G18570	down	-1.21771	0.00903026	-1.1216	0.0118079
AT2G26640	down	-1.1008	0.0389555	-1.21772	0.0151903
AT2G18290	down	-1.19201	0.0029834	-1.12323	0.00281234
AT3G25210	down	-1.1873	0.00971798	-1.11322	0.00780399
AT4G14100	down	-1.11696	0.00135669	-1.17888	0.000383426
AT4G39040	down	-1.28295	0.00466327	-1.00983	0.0243176
AT3G27030	down	-1.28219	0.00974263	-1.00727	0.0308294
AT5G11800	down	-1.10438	0.0198754	-1.18288	0.00678607
AT3G10270	down	-1.22151	0.000417125	-1.06449	0.000926502
AT1G30610	down	-1.1831	0.0217559	-1.0962	0.016623
AT2G30695	down	-1.04625	0.0251168	-1.23237	0.00527138
AT4G10890	down	-1.13458	0.00925468	-1.13783	0.00367103
AT1G16080	down	-1.24886	0.000465558	-1.00674	0.00402996
AT4G14890	down	-1.12252	0.0173283	-1.13049	0.0135517
AT1G14920	down	-1.01574	0.0217207	-1.23593	0.00313584
AT1G32440	down	-1.03399	0.0172767	-1.21756	0.0030697
AT5G60970	down	-1.11409	0.0179088	-1.13242	0.00808553
AT1G73060	down	-1.2108	5.78e-06	-1.03469	6.11e-05
AT4G01040	down	-1.15309	0.00198373	-1.08118	0.00197531
AT5G17170	down	-1.03726	0.0116493	-1.18108	0.00282926
AT1G04200	down	-1.20568	0.0057869	-1.01199	0.0135339
AT1G09010	down	-1.07372	0.0114312	-1.13867	0.00541814
AT1G03687	down	-1.09978	0.0199003	-1.08357	0.00977302
AT2G18960	down	-1.11606	3.77e-05	-1.05394	7.93e-05
AT4G32410	down	-1.1045	0.00323691	-1.05136	0.00412094
AT4G25740	down	-1.01244	0.0190218	-1.14312	0.00590015
AT3G51950	down	-1.07432	0.0104456	-1.07151	0.00827744
AT2G40540	down	-1.02444	0.0207543	-1.11117	0.00775306
AT3G16260	down	-1.08858	0.000752965	-1.03162	0.000524006
AT3G17040	down	-1.00532	0.00112319	-1.11046	0.00015314
AT5G15440	down	-1.01425	0.00175972	-1.09937	0.000260854
AT4G33030	down	-1.01182	0.00307287	-1.09498	0.000894237
AT1G64355	down	-1.04683	0.00175639	-1.04779	0.00110446
AT4G30000	down	-1.02641	0.0388921	-1.06058	0.0177408
AT4G00560	down	-1.06611	0.0114986	-1.01665	0.0118338
AT1G30210	down	-1.02883	0.000385765	-1.0211	0.000146501
AT3G06430	down	-1.01078	0.0378374	-1.03303	0.0248733
AT3G62120	down	-1.01763	0.000325845	-1.02512	0.000173125
AT1G62020	down	-1.0067	0.0013529	-1.01317	0.00082895
AT5G20140	down	-1.0047	0.0129137	-1.01138	0.00801326

## Sheet: Welch_vsBaseline_p05_ranked
User_ID	Direction	atg5TCV-Col0TCV_log2FC	atg5TCV-Col0TCV_adjPval	rbohDFTCV-Col0TCV_log2FC	rbohDFTCV-Col0TCV_adjPval	p_atg5_vs_baseline	p_rbohDF_vs_baseline	mean_baseline	mean_Col0	mean_sid2	mean_rbohD	mean_rbohF	mean_atg5	mean_rbohDF	Z0_baseline_pool	Z0_Col0	Z0_sid2	Z0_rbohD	Z0_rbohF	Z0_atg5	Z0_rbohDF	RankScore
AT1G24600	up	4.37204	2.18e-10	3.97263	5.07e-09	3.83013e-10	0.00423086	1.40089	1.51575	1.64166	1.33599	1.11017	5.27402	4.88131	0	0.0658336	0.138005	-0.0372006	-0.166638	2.22006	1.99496	2.10751
AT4G05100	up	4.18387	8.6e-05	3.35365	0.00170272	3.46622e-05	0.0025606	1.12121	1.26937	0.864786	1.39055	0.960122	5.07818	4.36663	0	0.086189	-0.149164	0.156682	-0.0937061	2.30183	1.88791	2.09487
AT2G41000	up	1.33609	1.5e-05	1.03011	0.000822013	8.52044e-06	0.008621	3.37015	3.53138	3.35847	3.2377	3.35304	4.68651	4.53209	0	0.272319	-0.0197202	-0.223703	-0.0288958	2.22336	1.96254	2.09295
AT3G27380	up	1.14362	6.16e-08	1.03694	5.92e-07	0.000103313	0.00469594	6.04611	6.19759	6.04219	5.86903	6.07563	7.20595	7.24948	0	0.26794	-0.0069396	-0.313222	0.0522212	2.05154	2.12854	2.09004
AT3G44880	up	1.72459	7.95e-06	1.7761	2.61e-06	1.04507e-07	0.0149224	5.34789	5.54451	5.13225	5.18969	5.52513	7.14569	7.31753	0	0.217844	-0.23893	-0.175282	0.196369	1.99191	2.18231	2.08711
AT4G12000	up	1.39835	0.00136031	1.17029	0.00699292	0.00219962	0.0198589	3.71678	3.93136	3.64587	3.58125	3.70863	5.13926	4.98293	0	0.33301	-0.11004	-0.210322	-0.0126485	2.20754	1.96493	2.08624
AT2G31990	up	2.10388	0.000774665	1.90157	0.00198553	0.000225061	0.0433921	1.72476	1.60252	1.70799	1.97554	1.613	3.2492	3.12334	0	-0.174443	-0.0239375	0.357864	-0.159484	2.17535	1.99576	2.08555
AT1G11910	up	1.28604	4.08e-05	1.34038	1.26e-05	5.6598e-07	0.0102721	9.03839	9.25431	8.84345	8.97675	9.07904	10.4304	10.6316	0	0.301323	-0.272041	-0.0860175	0.056736	1.9426	2.22339	2.08299
AT4G32250	up	1.94224	7.32e-06	1.45297	0.000856459	2.75032e-06	0.00249234	4.93282	4.8027	5.11632	4.91623	4.89602	6.59927	6.25131	0	-0.181525	0.256007	-0.0231468	-0.0513349	2.32488	1.83944	2.08216
AT1G53030	up	1.73259	4.67e-07	1.32547	0.000116643	0.00920544	0.00191868	5.05864	4.94418	4.98544	5.22396	5.08097	6.48958	6.2107	0	-0.184503	-0.117984	0.266492	0.0359951	2.3066	1.85706	2.08183
AT2G27180	up	3.24038	2.44e-05	2.72819	0.000372397	0.000774894	0.000183315	0.942507	0.823511	0.712324	1.05773	1.17647	2.90463	2.61687	0	-0.136131	-0.26333	0.131811	0.26765	2.24467	1.91547	2.08007
AT2G28200	up	1.93595	1.31e-06	1.45922	0.000283085	0.00874249	0.0048751	3.03689	3.36497	3.00409	2.88132	2.89717	5.05912	4.77958	0	0.362442	-0.0362322	-0.171855	-0.154355	2.234	1.92518	2.07959
AT5G57910	up	2.84589	2.1e-08	2.05721	5.82e-05	0.000417795	0.00150544	3.14599	3.03404	3.06794	3.3542	3.12777	5.62219	4.96768	0	-0.108103	-0.0753698	0.201068	-0.017595	2.39126	1.75921	2.07524
AT5G42050	up	1.29918	0.0362492	1.40071	0.019536	0.00137837	1.13432e-05	8.09293	8.33279	7.81013	8.13121	8.09761	9.62455	9.86293	0	0.30136	-0.355323	0.0480912	0.00587164	1.92432	2.22383	2.07408
AT1G44170	up	1.55016	2.64e-07	1.11713	0.000226994	0.000310789	0.00470397	4.17683	4.30806	3.99201	4.31338	4.09385	5.68586	5.39325	0	0.199526	-0.280993	0.207615	-0.126149	2.29426	1.84939	2.07182
AT1G54570	up	3.52083	1.37e-08	4.29817	5.71e-13	1.38209e-08	0.0234145	2.2482	1.96527	2.37099	1.9431	2.71343	4.99633	5.69172	0	-0.18914	0.0820863	-0.203962	0.311016	1.83718	2.30206	2.06962
AT5G52510	up	1.42236	1.64e-07	1.55788	2.31e-09	0.00919227	0.049138	4.23948	4.13812	4.0849	4.27674	4.45817	5.36888	5.5689	0	-0.170577	-0.260146	0.0627032	0.36802	1.90061	2.23722	2.06891
AT2G18780	up	2.06282	3.52e-05	2.33018	7.7e-07	9.6254e-07	0.0116544	1.86375	1.66173	1.80634	1.89253	2.09438	3.22029	3.57519	0	-0.272451	-0.077421	0.0388176	0.311054	1.82955	2.30819	2.06887
AT5G10946	up	2.13278	0.00116213	1.74361	0.00790063	0.0195242	0.0246481	4.19226	4.11971	3.89221	4.21476	4.54236	6.14621	5.95435	0	-0.0807802	-0.334083	0.025055	0.389808	2.17559	1.96197	2.06878
AT5G39590	up	1.34397	0.000136537	1.15721	0.000934438	0.0219237	0.000171096	4.92185	5.17705	4.81888	5.0341	4.65738	6.33444	6.32257	0	0.373797	-0.150827	0.164416	-0.387387	2.06908	2.0517	2.06039
AT5G53920	up	2.01874	0.000463998	1.38663	0.0195497	0.0443153	1.88542e-06	1.26094	1.21152	1.17834	1.44198	1.21193	2.50545	2.18828	0	-0.0937615	-0.156713	0.34346	-0.0929853	2.36102	1.75929	2.06016
AT1G44820	up	1.0104	0.00490571	1.05195	0.00241585	0.00357077	0.00278459	4.204	4.37813	4.30742	4.05419	4.07625	5.21568	5.42516	0	0.321184	0.190756	-0.276314	-0.235625	1.86604	2.25243	2.05924
AT2G35300	up	7.55493	3.51e-05	9.42103	9.26e-08	0.00571458	0.0113381	0.476911	0.152042	0.138857	0.826723	0.790024	4.31297	5.95524	0	-0.143601	-0.149429	0.154626	0.138405	1.69565	2.42157	2.05861
AT5G65110	up	2.34085	0.00442858	2.10572	0.00960923	0.000288265	0.01174	4.53577	4.69822	3.99901	4.64125	4.80458	6.85767	6.67809	0	0.149796	-0.494927	0.0972658	0.247865	2.14094	1.97537	2.05816
AT3G57380	up	2.58174	0.0138558	2.93652	0.00344412	0.000808216	0.00451692	1.53555	1.47059	1.45002	1.25235	1.96923	3.40889	3.83804	0	-0.0639789	-0.0842448	-0.278943	0.427167	1.8452	2.2679	2.05655
AT4G14790	up	1.24001	0.00479798	1.4106	0.000534352	0.00984779	0.0447409	2.01731	2.11106	2.19638	1.92778	1.83403	3.0152	3.23305	0	0.174098	0.33256	-0.166273	-0.340384	1.85326	2.25785	2.05555
AT1G74020	up	2.50105	1.92e-05	2.56644	7.5e-06	4.93119e-07	0.041421	4.25227	4.49265	3.58237	4.4027	4.53136	6.96182	6.75412	0	0.189234	-0.527364	0.118423	0.219708	2.13305	1.96954	2.05129
AT5G14700	up	1.76652	0.000405973	2.03968	2.2e-05	0.014944	0.0068415	3.60092	3.39014	3.63571	3.47995	3.89787	4.9353	5.31216	0	-0.283718	0.0468392	-0.162838	0.399717	1.79618	2.30346	2.04982
AT5G39090	up	2.11507	0.00196907	2.15285	0.00117938	0.0027912	4.12389e-05	1.59433	1.90293	1.14722	1.36223	1.96494	3.79257	4.0005	0	0.274653	-0.397929	-0.206566	0.329842	1.95643	2.14148	2.04896
AT3G03870	up	1.83367	0.0237453	1.69274	0.0335677	4.93137e-05	0.00805613	5.82267	5.91962	5.36079	6.02385	5.98644	7.60206	7.51548	0	0.11435	-0.544811	0.237296	0.193166	2.09886	1.99673	2.04779
AT1G30475	up	1.67153	0.000656471	1.08668	0.0308518	1.02239e-06	0.0105362	2.6216	2.73358	2.48935	2.44766	2.81581	4.16122	3.74789	0	0.171686	-0.202766	-0.266688	0.297768	2.36053	1.72682	2.04368
AT4G19860	up	1.35066	0.0077317	1.1533	0.0219832	0.0349259	0.000301046	5.08956	5.42077	4.82767	4.9097	5.20012	6.52765	6.55658	0	0.46557	-0.368138	-0.252835	0.155403	2.02151	2.06217	2.04184
AT5G46180	up	1.93256	1.7e-05	1.68322	0.000158726	1.64903e-06	0.0224908	4.90168	5.23106	4.35205	4.90464	5.11895	7.04315	6.87282	0	0.326405	-0.544646	0.0029391	0.215302	2.12208	1.95329	2.03768
AT4G30490	up	1.54208	0.00373751	1.24286	0.0193845	0.024271	0.00257066	4.13177	4.59573	3.80722	4.02331	4.1008	5.87853	5.80959	0	0.551594	-0.385843	-0.128941	-0.0368105	2.0767	1.99474	2.03572
AT4G27780	up	1.27235	0.00174795	1.88344	7.53e-07	0.00223601	0.0269257	4.10396	4.09486	4.03621	4.05141	4.23336	5.18942	5.82831	0	-0.0131795	-0.0981253	-0.0761203	0.187425	1.57221	2.4976	2.0349
AT3G03450	up	1.56249	0.00168895	1.56073	0.00118825	0.0317795	0.0253421	2.78703	2.57097	2.65118	2.92609	2.99989	3.81327	3.93743	0	-0.403925	-0.253977	0.259967	0.397935	1.91854	2.15066	2.0346
AT3G06810	up	1.42607	0.000200866	1.03673	0.0074345	0.0334116	0.0144177	4.72547	4.94195	4.41682	4.65132	4.89181	6.14591	5.92187	0	0.336515	-0.479806	-0.115274	0.258566	2.20805	1.85978	2.03392
AT3G26840	up	2.54788	0.000359862	2.08023	0.00354499	1.07824e-06	0.0123315	4.09255	4.0883	3.55596	4.10563	4.62032	6.56693	6.21152	0	-0.00375917	-0.474823	0.0115702	0.467012	2.18952	1.87503	2.03227
AT5G15260	up	1.5001	9.43e-05	1.4725	8.92e-05	7.23579e-06	0.0486861	4.01097	4.06787	3.61372	4.22895	4.13334	5.39545	5.36075	0	0.0845653	-0.590412	0.323976	0.181871	2.0577	2.00613	2.03191
AT3G54950	up	1.83744	2.6e-05	1.71054	6.65e-05	0.000433129	0.0309612	3.25923	3.04677	3.0645	3.29194	3.63373	4.67009	4.58755	0	-0.315046	-0.288759	0.0484912	0.555313	2.09205	1.96966	2.03085
AT5G07680	up	3.40202	0.000566212	2.95154	0.00260168	0.000365896	0.000507957	1.57456	1.86766	0.671127	1.66162	2.09782	4.83993	4.59218	0	0.189375	-0.583714	0.0562532	0.338086	2.10978	1.94971	2.02974
AT5G13750	up	1.77646	6e-05	2.77225	2.86e-11	0.00181025	0.024436	3.39651	3.61395	3.06537	3.29493	3.61178	5.22215	6.15233	0	0.192661	-0.2934	-0.0900008	0.19074	1.61758	2.44174	2.02966
AT2G18950	up	2.06173	1.75e-08	1.57354	1.7e-05	4.30902e-06	0.00562767	5.20877	5.22137	5.17665	4.81355	5.62351	7.1383	6.80369	0	0.0145091	-0.0369861	-0.45505	0.477527	2.22163	1.83637	2.029
AT2G01890	up	3.18074	2.31e-06	2.08696	0.00230872	2.98912e-08	0.000147204	3.64319	4.35353	3.34114	3.21627	3.66181	7.3594	6.33859	0	0.449224	-0.191019	-0.269984	0.0117781	2.35015	1.70459	2.02737
AT5G50100	up	1.48784	4.71e-05	1.00577	0.00690007	0.00175397	0.0232858	5.20693	5.57508	5.23456	4.863	5.15507	6.92171	6.59086	0	0.481148	0.0361146	-0.449489	-0.0677734	2.24112	1.80872	2.02492
AT4G00200	up	2.37094	3.16e-06	1.6024	0.00212791	4.41606e-05	0.035728	1.69484	1.94779	1.26714	1.67366	1.89075	3.85015	3.25694	0	0.27523	-0.465359	-0.0230397	0.213168	2.34512	1.69966	2.02239
AT4G22270	up	1.76147	0.000358044	2.64734	2.31e-09	4.20889e-08	0.0466964	1.73872	1.66315	1.77598	1.60094	1.9148	2.97429	3.757	0	-0.0938223	0.0462681	-0.171057	0.218611	1.53399	2.50575	2.01987
AT4G36720	up	1.587	1.2e-07	1.05368	0.000527958	0.000848863	1.43031e-05	4.65654	4.54243	4.48527	4.69686	4.90161	5.97187	5.59049	0	-0.204777	-0.30736	0.0723566	0.43978	2.36038	1.67598	2.01818
AT2G36950	up	2.6497	2.49e-06	3.45562	1.65e-10	1.50615e-05	0.00519295	3.62776	3.63931	3.14027	3.39671	4.33477	6.04681	6.89846	0	0.00818131	-0.34551	-0.163757	0.501085	1.71448	2.31807	2.01628
AT5G64930	up	1.00853	0.00154259	1.01436	0.000985304	0.000175356	0.0309599	4.18582	4.17361	3.92697	4.27	4.37268	5.03133	5.1072	0	-0.0278421	-0.59056	0.192074	0.426328	1.92904	2.10215	2.0156
AT1G05340	up	4.85355	7.8e-06	5.90245	2.1e-08	0.000114374	0.0386998	4.626	4.48732	3.23684	5.46197	5.31788	9.09599	9.38866	0	-0.0604447	-0.605479	0.364364	0.30156	1.94829	2.07585	2.01207
AT1G06570	up	1.76627	1.43e-06	1.20748	0.0011367	7.91618e-06	0.000768099	4.89306	5.40838	4.49309	4.64819	5.02259	7.03738	6.64511	0	0.531524	-0.412547	-0.252573	0.133596	2.21174	1.80713	2.00944
AT5G03905	up	1.61015	4.02e-07	1.08584	0.000748541	0.00215438	4.65275e-05	4.47681	4.27547	4.40282	4.69255	4.53642	5.69043	5.32012	0	-0.392988	-0.144418	0.421073	0.116333	2.36875	1.64597	2.00736
AT4G39140	up	1.02862	0.0158652	1.39139	0.000518618	0.000147383	0.000417932	4.35081	4.56748	4.10694	4.16742	4.56139	5.47527	5.93553	0	0.320811	-0.361073	-0.271537	0.311799	1.66492	2.3464	2.00566
AT4G16670	up	1.05997	0.00974873	1.23613	0.00155824	0.00178843	0.0339842	3.9432	4.11481	3.62235	4.1855	3.85015	5.02569	5.31476	0	0.280303	-0.524065	0.395757	-0.151995	1.76809	2.24025	2.00417
AT1G75170	up	1.47684	0.00439375	1.14846	0.0271513	5.96703e-07	0.000194022	4.18841	4.83338	3.82251	4.05002	4.04772	6.2658	6.0279	0	0.659934	-0.374381	-0.141599	-0.143954	2.12557	1.88215	2.00386
AT1G62370	up	4.76925	2.43e-08	4.0466	1.91e-06	3.24471e-05	0.0126655	1.4943	1.36022	0.697892	1.40964	2.50944	5.28353	4.60673	0	-0.0778495	-0.462425	-0.049157	0.589431	2.20018	1.80721	2.00369
AT1G08770	up	1.14665	1.91e-05	1.01958	0.000113353	0.00775933	0.0278297	5.08712	4.97997	4.86498	5.19246	5.31108	5.966	5.93821	0	-0.248003	-0.51414	0.243801	0.518341	2.03416	1.96983	2.00199
AT5G17380	up	1.23812	0.000842707	1.23344	0.000680028	0.000196365	3.12863e-07	5.43989	5.89746	4.97315	5.30267	5.58626	7.04782	7.19614	0	0.543611	-0.554491	-0.16302	0.1739	1.91028	2.08648	1.99838
AT2G45023	up	1.83303	7.29e-06	1.67363	2.73e-05	0.0104912	0.0100003	2.53378	2.24599	2.88523	2.63496	2.36893	3.74332	3.71376	0	-0.481045	0.587454	0.169133	-0.275541	2.02178	1.97237	1.99707
AT4G16690	up	2.45498	1.59e-06	2.02434	7.09e-05	7.78577e-06	0.000352099	5.08082	5.82432	4.21311	5.38346	4.9024	8.1751	7.8604	0	0.505511	-0.589961	0.205763	-0.121313	2.10382	1.88985	1.99683
AT1G13740	up	2.38698	0.000207548	2.21505	0.00047304	2.74469e-08	0.00837188	2.69826	2.18433	2.90701	2.8517	2.84998	4.16142	4.10717	0	-0.714363	0.290171	0.213287	0.210905	2.03382	1.95842	1.99612
AT5G61530	up	1.12741	0.0257345	1.19803	0.0141271	0.0177133	0.0107043	4.74568	4.76693	4.37249	4.92711	4.91622	5.77481	5.955	0	0.0378697	-0.665268	0.323405	0.303994	1.83453	2.15573	1.99513
AT3G57390	up	1.28242	0.00117082	1.02688	0.00902063	0.000364473	0.00126924	3.41064	3.27787	3.29039	3.34038	3.73391	4.36904	4.2754	0	-0.290429	-0.263036	-0.153684	0.707149	2.0965	1.89165	1.99408
AT5G47590	up	3.14343	3.6e-05	2.09499	0.00707538	0.000889104	0.0281073	2.52464	2.37942	2.05203	2.81924	2.84785	5.12027	4.24495	0	-0.134171	-0.43668	0.272207	0.298645	2.39831	1.58953	1.99392
AT1G51340	up	1.42525	0.00113201	1.19704	0.00583954	0.00138142	0.0155717	2.92435	3.24312	2.58461	2.6611	3.20858	4.42397	4.32645	0	0.437957	-0.466778	-0.361689	0.39051	2.06036	1.92638	1.99337
AT3G05830	up	1.14045	0.0231551	1.0112	0.0398502	0.001201	0.0146702	3.16736	3.13418	2.91421	3.1515	3.46954	4.11537	4.08756	0	-0.070711	-0.53961	-0.033795	0.644116	2.02074	1.96148	1.99111
AT4G16600	up	2.92852	0.0116951	2.54089	0.026733	0.00270696	9.26576e-05	0.43639	0.311648	0.191701	0.533176	0.709034	1.45376	1.32395	0	-0.260374	-0.510739	0.202022	0.569091	2.12357	1.8526	1.98808
AT3G55910	up	2.99003	0.000471753	2.36503	0.00596991	2.5083e-05	0.00354635	1.33094	1.21995	0.82558	1.35645	1.92178	3.48841	3.05779	0	-0.113481	-0.516703	0.0260806	0.604103	2.20589	1.7656	1.98575
AT1G80300	up	1.37197	4.23e-06	1.47628	3.78e-07	0.00719948	9.46401e-09	6.1394	6.21525	6.09613	5.70952	6.53668	7.43589	7.72016	0	0.10468	-0.0597103	-0.593262	0.548292	1.78927	2.1816	1.98543
AT5G11090	up	2.24064	0.000404289	2.39886	0.000102678	2.33829e-06	0.0115358	5.76111	5.3898	5.36157	6.02649	6.26656	7.50972	7.69753	0	-0.400095	-0.430514	0.285959	0.54465	1.8842	2.08657	1.98539
AT5G48180	up	2.22654	6.72e-08	1.90202	3.31e-06	0.00439826	0.0140997	7.12421	7.44494	6.37177	7.06259	7.61754	9.48543	9.2134	0	0.285822	-0.67054	-0.0549144	0.439632	2.1042	1.86178	1.98299
AT1G48790	up	1.02422	1.09e-05	1.05826	1.91e-06	0.0121926	1.65783e-05	4.23224	4.04216	4.20049	4.20214	4.48418	4.92255	5.11327	0	-0.479539	-0.0801015	-0.0759412	0.635582	1.7415	2.22264	1.98207
AT2G33150	up	1.90491	4.37e-08	1.25562	0.000362169	0.00175069	0.002448	7.99575	8.23713	7.39393	8.09922	8.25272	9.99509	9.51528	0	0.271578	-0.677114	0.116418	0.289119	2.24948	1.70965	1.97957
AT3G57010	up	4.12973	0.000325195	7.3297	8.08e-12	0.0139006	0.0485838	0.971587	0.735366	1.12659	1.18325	0.84115	3.46978	5.72903	0	-0.128609	0.0843886	0.115235	-0.0710153	1.36012	2.59015	1.97513
AT1G09687	up	1.19017	0.00655195	1.43195	0.000426689	0.00188712	0.000152902	2.67349	2.47203	2.56563	2.90365	2.75267	3.41051	3.75086	0	-0.438468	-0.234758	0.500911	0.172315	1.60403	2.34477	1.9744
AT3G53120	up	1.20517	0.00210078	1.08121	0.00502467	0.00821526	0.0399742	3.93749	3.91176	3.59602	4.03594	4.20623	4.94292	4.89807	0	-0.0516535	-0.685556	0.197661	0.539549	2.01856	1.9285	1.97353
AT2G34610	up	5.17297	7.04e-06	6.54755	3.4e-09	0.0172078	0.00119048	0.829376	0.551631	0	0.930788	1.83508	3.83008	5.35374	0	-0.145635	-0.43488	0.0531751	0.527339	1.57341	2.37233	1.97287
AT3G55560	up	1.66439	0.00616833	2.07346	0.00034779	0.000922216	0.010734	3.97586	3.77395	3.58711	4.31917	4.22323	5.23844	5.66189	0	-0.269867	-0.519599	0.45885	0.330616	1.68752	2.25349	1.9705
AT5G54840	up	2.18031	0.000127247	2.86115	1.59e-07	1.27651e-06	1.89877e-07	3.57776	3.8668	2.5582	3.90712	3.9789	6.01507	6.78899	0	0.201651	-0.711298	0.229782	0.279865	1.70041	2.24034	1.97038
AT5G27150	up	1.28688	0.000127955	1.04009	0.0019452	3.49411e-06	8.49141e-06	6.04937	6.36778	5.49924	6.10973	6.22073	7.52413	7.43139	0	0.438631	-0.75784	0.0831512	0.236058	2.03158	1.90383	1.96771
AT5G46720	up	1.71024	9.43e-08	1.35797	1.59e-05	0.00371716	0.000100398	2.16632	1.91186	1.98902	2.41144	2.35297	3.20722	3.04091	0	-0.521605	-0.363434	0.502444	0.382594	2.13366	1.79275	1.96321
AT1G45976	up	1.15046	9.55e-05	1.13209	8.18e-05	1.21269e-06	0.0458267	4.78431	4.60377	4.67186	4.74507	5.11654	5.59903	5.64809	0	-0.422137	-0.262933	-0.0917379	0.776808	1.90496	2.01967	1.96232
AT4G21215	up	1.58096	7.92e-05	1.43208	0.000298285	1.59688e-07	0.0445732	4.39448	4.3265	3.96043	4.46394	4.82707	5.7858	5.64031	0	-0.101093	-0.645414	0.103274	0.643233	2.0688	1.85246	1.96063
AT3G60961	up	2.67648	0.000228502	2.22275	0.00215991	0.0022247	0.0075027	1.77076	1.62463	1.10887	2.30537	2.04418	3.83833	3.57501	0	-0.147976	-0.670228	0.541342	0.276862	2.09361	1.82697	1.96029
AT2G16890	up	2.42627	0.000609336	3.30452	3.42e-07	0.00306962	1.11486e-07	1.05865	0.884164	1.5446	0.818138	0.987695	2.39622	3.28535	0	-0.191918	0.534503	-0.264542	-0.078043	1.47121	2.44919	1.9602
AT5G15853	up	2.77203	0.00169863	1.95104	0.0307802	0.00552941	0.00804142	1.46959	1.14367	1.38759	1.77276	1.57435	3.02537	2.46122	0	-0.501123	-0.126081	0.466136	0.161068	2.39206	1.52466	1.95836
AT3G17770	up	1.37485	0.00364873	1.6777	0.0002096	3.27612e-05	0.0304501	4.08844	4.5421	3.41728	4.0343	4.36008	5.77609	6.05172	0	0.486653	-0.719967	-0.0580786	0.291392	1.81038	2.10605	1.95822
AT5G13800	up	1.88622	2.69e-06	1.16594	0.00459671	0.0017208	0.0168505	5.64201	5.69888	5.47219	5.2773	6.11966	7.4448	6.89869	0	0.0727953	-0.217358	-0.466804	0.611367	2.30746	1.60847	1.95796
AT5G67160	up	1.977	0.000203999	1.98581	0.000126085	4.11511e-05	0.0322536	2.63392	2.53429	2.26687	2.45725	3.27727	4.18285	4.28523	0	-0.121883	-0.449043	-0.216144	0.787071	1.89495	2.0202	1.95757
AT2G46790	up	1.6178	1.24e-07	1.77942	1.8e-09	1.06367e-05	1.51242e-06	4.62968	4.45857	4.1732	4.90898	4.97797	5.90352	6.19997	0	-0.23514	-0.627294	0.383811	0.478623	1.75051	2.15789	1.9542
AT4G37310	up	1.11767	0.01969	1.00669	0.0327915	0.000124382	0.00718463	4.89845	5.44968	4.78384	4.38617	4.97411	6.43388	6.46952	0	0.692421	-0.143966	-0.643492	0.0950372	1.92872	1.97348	1.9511
AT1G22930	up	1.78406	0.00105199	1.1956	0.0311223	0.000950528	0.00387647	6.13458	6.53109	5.55776	5.89302	6.55644	8.18504	7.75272	0	0.421653	-0.613388	-0.256869	0.448604	2.18045	1.72072	1.95059
AT5G47560	up	1.74286	0.0115778	1.53845	0.0242589	2.07597e-05	9.31291e-05	6.42736	7.38291	5.5137	6.48407	6.32876	9.13112	9.08911	0	0.694513	-0.664066	0.0412178	-0.0716647	1.96514	1.93461	1.94988
AT3G15760	up	2.28872	0.00554179	1.8963	0.0211419	0.000136758	0.0229854	3.83474	4.59357	2.83671	4.15814	3.75053	6.743	6.27157	0	0.552503	-0.726664	0.235472	-0.0613104	2.1175	1.77425	1.94588
AT2G22790	up	1.93972	0.00694184	1.84188	0.00851019	4.60444e-06	0.0137731	1.74372	1.65882	1.22859	2.14574	1.94171	3.11899	3.11126	0	-0.120434	-0.730806	0.570352	0.280887	1.95108	1.94012	1.9456
AT1G62570	up	2.83901	6.84e-07	2.19906	0.000127746	5.62334e-07	0.0132916	2.0773	1.86691	2.04123	1.55983	2.84124	4.32515	3.84195	0	-0.204019	-0.0349815	-0.50181	0.74081	2.17981	1.71124	1.94553
AT1G21410	up	1.40218	0.00223885	1.32235	0.00335506	0.00309624	0.00122786	4.40839	5.23378	3.78332	4.33895	4.27752	6.4423	6.54409	0	0.769998	-0.583123	-0.0647835	-0.122092	1.89741	1.99237	1.94489
AT3G12070	up	1.5206	0.0175181	1.99199	0.000560643	0.000808736	0.0177232	1.18249	1.31215	0.752194	1.55904	1.10658	2.29394	2.79605	0	0.184884	-0.613583	0.536947	-0.108248	1.58487	2.30086	1.94287
AT3G61060	up	1.62426	0.028288	1.65061	0.0219576	8.48508e-06	0.00382699	4.27912	4.96736	3.47542	4.08875	4.58497	6.44434	6.51402	0	0.607316	-0.709208	-0.167988	0.26988	1.91063	1.97212	1.94137
AT1G67880	up	1.19928	0.00420474	1.13061	0.00571565	1.29981e-05	0.000273592	3.84532	3.72153	3.52501	4.11304	4.0217	4.73894	4.80174	0	-0.25967	-0.671919	0.561593	0.369996	1.87452	2.00625	1.94039
AT3G28007	up	2.97389	0.000983674	5.21871	5.87e-10	0.000869832	2.61485e-05	1.36079	1.58477	0.289261	1.36432	2.20481	4.3146	6.60328	0	0.105736	-0.505846	0.00166618	0.398444	1.39443	2.47487	1.93465
AT4G37320	up	1.75101	0.00048814	3.45382	1.56e-14	0.00294465	0.0228181	2.24062	2.21153	2.48987	2.12404	2.13703	3.6015	5.10802	0	-0.0265837	0.227826	-0.106559	-0.0946829	1.2439	2.62093	1.93241
AT3G16900	up	2.47037	0.000739348	2.31099	0.0012193	0.0122204	0.00201699	1.21631	0.984339	0.77132	1.59435	1.51521	2.53396	2.55698	0	-0.337169	-0.646797	0.549496	0.434469	1.91524	1.94871	1.93197
AT1G78420	up	1.18084	0.0141991	1.5726	0.000524858	0.00202622	0.0370079	4.08353	4.08094	3.60568	4.22558	4.42193	5.15194	5.51138	0	-0.00401132	-0.73959	0.21985	0.523752	1.65361	2.20991	1.93176
AT4G22780	up	1.63914	0.0190862	2.02802	0.00227069	0.000785757	0.0408611	3.66526	3.29707	3.60592	4.14842	3.60963	4.74704	5.10896	0	-0.562893	-0.09072	0.738657	-0.0850438	1.65383	2.20713	1.93048
AT5G57060	up	1.44873	5.72e-05	2.34938	2.57e-12	0.0321962	0.0241788	4.17324	3.93588	3.99529	4.30562	4.45615	5.17623	6.07486	0	-0.315232	-0.236329	0.175822	0.375738	1.33209	2.52556	1.92883
AT2G45570	up	3.37217	0.0498977	4.03995	0.0138953	6.30688e-06	3.61649e-05	2.73452	3.55078	0.675668	3.26437	3.44728	7.0098	7.63737	0	0.343046	-0.865272	0.222677	0.299548	1.79676	2.06051	1.92864
AT5G39610	up	2.93586	0.0152775	2.84877	0.0162005	4.71753e-05	0.00749916	3.39264	3.83255	1.98375	3.61094	4.14334	6.59499	6.48018	0	0.269521	-0.863203	0.133744	0.459938	1.96202	1.89168	1.92685
AT3G49210	up	3.97377	6.89e-06	3.76152	1.57e-05	1.95073e-06	0.000438105	2.56312	2.61724	0.95777	3.11144	3.56603	6.34748	6.1829	0	0.0281544	-0.835072	0.285224	0.521694	1.96855	1.88294	1.92575
AT2G33380	up	3.65261	1.59e-10	2.32969	5.5e-05	4.84103e-08	0.0230977	6.90113	7.31939	5.8712	6.58223	7.83171	10.8829	9.53297	0	0.243557	-0.599745	-0.185702	0.54189	2.31863	1.53256	1.9256
AT4G27410	up	2.22944	0.0305004	2.59654	0.00863758	8.283e-06	8.22792e-05	4.87336	5.29397	3.42488	5.21979	5.55479	7.85935	8.23116	0	0.254854	-0.87765	0.209909	0.412887	1.80924	2.03453	1.92189
AT4G30470	up	1.50061	0.00369173	1.86549	0.000159822	0.00023265	0.0294527	4.48234	4.59388	4.71945	4.84343	3.77259	5.91694	6.38921	0	0.128287	0.272704	0.415285	-0.816277	1.64992	2.19308	1.9215
AT5G29000	up	1.35065	0.0013503	1.76776	7.65e-06	0.000103476	0.0012195	3.27679	3.09598	2.90524	3.56889	3.53705	4.26283	4.76834	0	-0.280236	-0.575859	0.452722	0.403373	1.52826	2.31176	1.92001
AT4G11220	up	1.01421	0.000559945	1.24929	9.46e-06	9.48032e-05	1.08745e-05	6.36525	6.18936	6.36238	6.19855	6.71072	7.08914	7.47456	0	-0.367748	-0.00601086	-0.348536	0.722295	1.5135	2.31933	1.91642
AT1G76390	up	1.47209	0.0019501	1.15054	0.015621	0.000143048	0.0341991	3.45585	3.27516	3.40547	3.23296	3.90981	4.58508	4.3694	0	-0.338949	-0.0945032	-0.418096	0.851548	2.11822	1.71365	1.91593
AT3G03320	up	1.10606	0.0265758	1.14157	0.0161948	0.0334458	0.000738936	2.41864	2.54489	2.81837	2.12936	2.18193	3.37344	3.57432	0	0.229212	0.725725	-0.52519	-0.429747	1.73346	2.09816	1.91581
AT1G09773	up	2.78795	0.00772375	2.14562	0.0428864	0.0448005	0.000422576	0.901743	0.552795	0.885731	1.23664	0.931808	2.01118	1.70667	0	-0.697189	-0.0319921	0.669113	0.0600686	2.21663	1.60822	1.91243
AT1G03340	up	1.52399	0.0045346	1.23478	0.0209288	0.00825567	0.00116795	2.50199	2.64503	1.8471	2.82188	2.69393	3.9115	3.81596	0	0.200115	-0.91619	0.447539	0.268535	1.97193	1.83827	1.9051
AT1G01780	up	1.51428	0.000298791	1.41454	0.000525752	1.11676e-05	0.0167234	2.99092	2.70156	2.72762	3.32454	3.20995	3.94638	3.99388	0	-0.561757	-0.511164	0.647685	0.425235	1.85493	1.94714	1.90103
AT4G18800	up	2.2141	2.94e-13	1.31208	2.4e-05	0.00774668	0.00558466	4.35455	3.97858	4.46321	4.70944	4.26698	5.9726	5.2636	0	-0.563936	0.162984	0.532303	-0.131351	2.42699	1.36352	1.89526
AT1G13960	up	1.20569	0.00165424	1.74873	9.36e-07	0.000607637	0.0028614	3.75005	3.66612	3.32494	3.92705	4.08209	4.68101	5.29682	0	-0.128353	-0.650141	0.270688	0.507807	1.42375	2.36553	1.89464
AT1G08570	up	1.13437	0.00977402	1.05502	0.0146343	3.19073e-06	1.83299e-06	5.93333	6.99803	5.62138	5.44704	5.66685	8.0258	8.08488	0	0.949513	-0.278196	-0.433673	-0.237644	1.86609	1.91879	1.89244
AT1G74740	up	1.61714	0.000176336	2.23949	1.74e-08	0.0121551	0.0143085	2.59876	2.31238	2.29748	2.99679	2.78837	3.57715	4.25539	0	-0.411103	-0.43248	0.571387	0.272197	1.4045	2.37812	1.89131
AT1G77120	up	2.41181	0.00130887	5.27372	1.8e-14	0.0107825	0.00620407	2.00532	2.47893	0.989076	2.22441	2.32886	4.46914	7.14972	0	0.235351	-0.505001	0.108873	0.160776	1.22434	2.5564	1.89037
AT5G66760	up	1.00268	2.54e-05	1.72749	9.9e-15	7.80215e-06	0.00178789	6.1956	6.14961	5.94169	6.14078	6.55029	7.03571	7.90112	0	-0.0681724	-0.37641	-0.081258	0.52584	1.24548	2.52846	1.88697
AT3G22750	up	2.13834	1.9e-05	1.4047	0.00612879	3.41555e-07	0.0152386	2.36243	2.80807	1.43547	2.50555	2.70063	4.64857	4.00138	0	0.42692	-0.888028	0.137113	0.323995	2.19013	1.57012	1.88013
AT3G44300	up	3.56671	0.00261949	2.53753	0.0345383	0.000164815	0.000268223	6.07033	7.15166	4.10849	7.0702	5.95098	10.6754	9.83566	0	0.485704	-0.881206	0.449114	-0.0536115	2.06845	1.69128	1.87987
AT4G20300	up	1.28449	1.12e-08	1.37816	1.64e-10	0.000118871	0.00163412	4.72358	4.39184	4.61761	5.10579	4.77907	5.51154	5.7208	0	-0.698159	-0.22302	0.804395	0.116785	1.65834	2.09873	1.87853
AT3G25290	up	3.16628	6.17e-07	2.6474	2.74e-05	2.20672e-06	0.00598069	4.21329	4.02237	3.12109	4.46412	5.24558	6.98574	6.56738	0	-0.139701	-0.7992	0.183539	0.755362	2.02869	1.72257	1.87563
AT3G45638	up	2.28231	0.00161637	1.74867	0.0167667	0.0403558	0.000127693	1.22181	1.13044	0.630958	1.63617	1.48966	2.63814	2.39953	0	-0.132054	-0.853947	0.598873	0.387128	2.047	1.70214	1.87457
AT3G05932	up	1.06637	0.00180259	1.38538	1.49e-05	0.0110648	0.000270474	4.02825	3.75543	3.95022	4.29754	4.10981	4.63409	5.07263	0	-0.61951	-0.177194	0.611499	0.185206	1.37573	2.37156	1.87365
AT1G04280	up	1.37951	0.0130948	1.17491	0.0328261	3.00959e-05	0.0275639	4.47039	4.50501	3.96232	4.98143	4.43279	5.7456	5.57495	0	0.0544753	-0.799303	0.803978	-0.0591506	2.00617	1.73771	1.87194
AT5G23950	up	4.42834	5.58e-18	2.10429	0.000232046	2.32105e-12	0.0435331	0.837207	0.881284	0.6168	0.663311	1.18743	4.14825	2.21095	0	0.0352225	-0.176131	-0.138963	0.279872	2.64591	1.09778	1.87185
AT3G57690	up	5.74622	0.0144545	5.5955	0.0145464	0.00693376	4.11077e-06	0.255256	0	0	0.442453	0.578573	1.08942	1.10724	0	-0.566598	-0.566598	0.415524	0.717672	1.85161	1.89116	1.87138
AT2G14115	up	1.31766	0.000268027	1.17885	0.000715754	0.0220281	0.0314005	2.55894	2.28531	2.38916	2.75622	2.80509	3.29449	3.28271	0	-0.70142	-0.435219	0.505689	0.63095	1.88546	1.85526	1.87036
AT5G59845	up	2.76867	0.000908321	2.01387	0.0182038	0.00352454	0.0402909	1.23923	0.887437	1.72978	1.24177	1.09793	2.63309	2.12592	0	-0.574905	0.801666	0.00415877	-0.23092	2.27788	1.44905	1.86346
AT5G16450	up	1.91966	6.86e-09	1.31242	9.03e-05	0.00170303	0.0434186	4.91197	4.90065	4.18569	5.21041	5.35113	6.65806	6.19975	0	-0.0138938	-0.891438	0.366306	0.539026	2.14316	1.58063	1.86189
AT5G43780	up	1.88097	0.0152086	1.72798	0.0234643	8.30582e-05	0.04392	4.98986	5.41399	3.8053	5.19606	5.54407	7.20533	7.12061	0	0.362082	-1.01124	0.176033	0.473127	1.89132	1.819	1.85516
AT5G26731	up	1.61246	0.00209849	1.26577	0.0159175	0.0125828	0.0194007	3.15953	2.90434	2.9722	3.68939	3.07221	4.23918	4.06315	0	-0.477307	-0.350377	0.991011	-0.163327	2.01929	1.69006	1.85468
AT4G31240	up	2.48283	8.31e-05	2.83556	3.27e-06	0.0126946	0.00534998	2.57762	2.39649	1.6188	3.00681	3.28841	4.41724	4.84387	0	-0.163637	-0.866195	0.387718	0.642114	1.66188	2.0473	1.85459
ATMG00210	up	1.92086	0.0163438	1.89952	0.0111997	0.0344249	0.021689	0.82397	0.567721	0.686152	0.983859	1.05815	1.40979	1.52843	0	-0.736137	-0.395914	0.45932	0.672731	1.68292	2.02372	1.85332
AT1G70780	up	1.73943	4.02e-06	1.24522	0.00106675	1.52393e-06	0.016468	7.97053	7.75082	7.54487	8.1108	8.47565	9.37959	8.9534	0	-0.34023	-0.65915	0.2172	0.78218	2.18194	1.52198	1.85196
AT1G27300	up	1.63907	0.00421969	2.13091	9.64e-05	0.000420718	0.000845899	5.18258	4.89991	4.60969	5.55619	5.66454	6.39296	6.98289	0	-0.347272	-0.70381	0.458981	0.592101	1.48698	2.21174	1.84936
AT3G59690	up	1.04647	0.0366504	2.07667	7.67e-07	0.000338528	0.0446666	2.05881	1.93511	1.98584	2.0579	2.2564	2.7018	3.6904	0	-0.200987	-0.11856	-0.00148763	0.321034	1.04468	2.65092	1.8478
AT1G34630	up	1.11469	0.00979254	2.18922	5.68e-09	0.00505767	0.0162925	2.39998	2.60457	2.57729	2.64987	1.76816	3.45443	4.49277	0	0.23958	0.207635	0.292626	-0.739842	1.23475	2.45062	1.84268
AT3G03550	up	1.68647	2.4e-05	1.51379	0.000105104	0.0155716	0.000184687	2.81754	2.40768	3.21459	2.6308	3.01709	3.75805	3.76106	0	-0.797799	0.772868	-0.3635	0.38843	1.83075	1.83661	1.83368
AT2G37520	up	1.00619	0.00276404	1.43643	4.06e-06	0.00511139	0.0228161	3.98286	3.91357	3.53686	4.17625	4.30478	4.74066	5.22421	0	-0.126738	-0.815689	0.35368	0.588746	1.38591	2.27025	1.82808
AT1G15405	up	2.20089	0.000676302	1.54595	0.0192728	0.0185785	0.00031226	2.35362	1.92274	2.90325	2.40986	2.17864	3.69248	3.29369	0	-0.691113	0.881569	0.0902034	-0.280659	2.14747	1.50782	1.82765
AT1G72800	up	1.73588	0.00786153	2.3728	0.000116132	7.08923e-05	0.00359237	3.5116	3.18673	2.96294	3.79784	4.0989	4.68773	5.41273	0	-0.385881	-0.6517	0.339996	0.697584	1.397	2.25815	1.82758
AT5G13330	up	2.2494	0.0372814	2.27458	0.0302989	0.000102157	0.00457414	4.10366	4.18965	2.81332	4.53144	4.88023	6.39493	6.41765	0	0.0682384	-1.02394	0.339459	0.616244	1.81823	1.83625	1.82724
AT3G60180	up	1.48258	0.00605595	1.66932	0.00130492	0.00446703	0.000321919	3.94177	3.82035	3.27384	4.4797	4.19318	5.14382	5.46142	0	-0.162901	-0.89615	0.721738	0.337314	1.61277	2.0389	1.82584
AT4G13030	up	2.16542	0.00106821	2.21927	0.000586027	0.000419639	0.00154914	3.45676	3.17739	2.60344	3.94267	4.10355	5.0887	5.27061	0	-0.293533	-0.896578	0.510534	0.679577	1.71466	1.9058	1.81023
AT5G07095	up	2.98481	0.00134812	4.47837	8.27e-08	0.039478	0.0259352	0.924502	0.470708	0.888445	1.04566	1.2932	1.76969	2.94777	0	-0.570636	-0.0453411	0.152354	0.463623	1.06281	2.54422	1.80351
AT1G05163	up	2.12126	0.0009363	1.46625	0.0251106	0.0208815	0.000415898	2.39614	1.96484	2.9539	2.46213	2.20367	3.69248	3.29369	0	-0.708659	0.916461	0.108436	-0.316238	2.13001	1.47476	1.80239
AT3G22942	up	1.65391	7.24e-05	1.49657	0.00025964	0.00126908	0.0109257	3.06298	2.88674	2.51307	3.70551	3.14658	4.28631	4.22983	0	-0.264728	-0.826006	0.965154	0.12558	1.83757	1.75273	1.79515
AT5G06750	up	1.09289	0.0406973	1.53505	0.00202731	0.00116126	0.0216383	3.92132	3.81074	3.39539	4.40457	4.07458	4.78901	5.27573	0	-0.17821	-0.847577	0.77879	0.246997	1.39835	2.18273	1.79054
AT1G78310	up	1.80116	0.000122962	1.86818	4e-05	0.000356101	0.0184707	3.41821	3.01007	2.96891	3.70481	3.98903	4.55021	4.69885	0	-0.605313	-0.666353	0.425071	0.846595	1.67889	1.89932	1.78911
AT2G31390	up	1.484	3.95e-07	1.13507	0.000104619	3.08985e-06	0.00423974	6.25089	6.04437	5.75846	6.44039	6.76036	7.40532	7.19923	0	-0.351131	-0.837218	0.322168	0.866181	1.96272	1.61233	1.78752
AT2G16700	up	1.68779	7.47e-05	1.33895	0.00171601	0.000115998	0.00151399	5.04878	5.07659	4.14816	5.47553	5.49484	6.67155	6.42264	0	0.0331684	-1.07425	0.509025	0.532055	1.93561	1.63872	1.78717
AT2G45500	up	1.23501	0.00606142	1.01886	0.022617	0.00174671	0.0046229	3.86016	3.78888	3.31008	4.1183	4.22339	4.86688	4.77372	0	-0.132384	-1.02155	0.479388	0.674546	1.86957	1.69657	1.78307
AT5G41800	up	1.52494	0.00010456	1.92588	1.71e-07	0.00430464	0.0430977	3.21166	2.71219	3.2321	3.27409	3.62824	3.95919	4.41891	0	-0.910191	0.0372477	0.113782	0.759162	1.36226	2.20003	1.78115
AT5G04340	up	3.18876	0.000565112	2.76322	0.00262784	0.00113126	0.00777618	4.4936	3.50704	4.20074	5.37321	4.89342	6.56892	6.24035	0	-0.918908	-0.272781	0.819291	0.372398	1.933	1.62697	1.77998
AT3G11600	up	2.21527	0.0006797	3.14841	2.86e-07	0.00762156	0.000566083	2.95611	2.20977	2.97097	3.13459	3.5091	4.02313	5.03779	0	-0.841969	0.0167719	0.201351	0.623846	1.20374	2.34842	1.77608
AT5G42930	up	3.61111	0.0266064	4.62393	0.00177339	0.0266545	0.0255132	0.366935	0.118297	0.60067	0.0927109	0.656062	0.942354	1.60107	0	-0.483958	0.454951	-0.533761	0.562767	1.12002	2.40216	1.76109
AT4G19645	up	1.52947	0.0282421	1.46446	0.0310426	0.000295481	0.000412816	2.4748	2.93485	1.27656	2.73942	2.94838	4.21197	4.25237	0	0.45775	-1.19226	0.263296	0.471216	1.7285	1.7687	1.7486
AT3G51740	up	2.08244	0.0092973	2.21951	0.0037109	0.00558806	0.0422309	1.60119	1.19273	1.15043	1.86947	2.19212	2.65498	2.7793	0	-0.63798	-0.704051	0.419039	0.922992	1.64595	1.84013	1.74304
AT4G24220	up	1.05868	0.00314661	1.08931	0.00183382	0.000442845	0.0101863	6.88342	6.83358	6.34579	6.94834	7.40597	7.75866	7.89372	0	-0.0919555	-0.991818	0.119769	0.964004	1.61464	1.86379	1.73921
AT1G03290	up	1.57364	0.00377588	1.18221	0.0305544	0.00016094	0.00296868	4.91004	4.99079	3.9578	5.47347	5.21809	6.50302	6.20383	0	0.0971201	-1.14523	0.677624	0.370481	1.91582	1.556	1.73591
AT3G51750	up	2.11278	0.000266782	2.80516	3.95e-07	0.000201958	0.00135745	3.55896	3.50451	2.14711	4.32972	4.25449	5.41881	6.23097	0	-0.0416553	-1.0802	0.589708	0.532148	1.42297	2.04435	1.73366
AT4G31875	up	3.81681	1.61e-06	2.48923	0.00261841	0.00289698	0.000832697	1.17589	0.733809	0.6168	1.31333	2.03961	3.24361	2.28793	0	-0.479507	-0.606422	0.149075	0.936854	2.24278	1.20619	1.72449
AT2G07725	up	2.08471	0.000634773	2.49631	9.22e-06	0.000728962	0.037631	1.57655	1.06211	1.34887	1.90858	1.98663	2.36604	2.77469	0	-0.892078	-0.394813	0.575773	0.711118	1.36906	2.0777	1.72338
AT5G16910	up	1.31364	0.00734758	1.46202	0.00195599	0.00078699	0.00125406	4.64096	4.42758	4.01212	4.96324	5.16088	5.61519	5.85359	0	-0.334756	-0.98656	0.505624	0.815693	1.52844	1.90246	1.71545
AT3G12830	up	3.01827	5.04e-06	1.45091	0.0374167	5.64033e-07	0.00234841	4.18849	3.97297	3.12532	4.92148	4.73418	6.92943	5.5318	0	-0.180554	-0.890682	0.614073	0.457162	2.29626	1.12537	1.71082
AT1G09867	up	2.55143	0.0017526	4.37702	1.04e-09	0.00846049	0.0365993	1.22551	0.576942	1.42966	1.54228	1.35317	2.00133	3.42067	0	-0.746547	0.234986	0.364621	0.14694	0.893021	2.52677	1.7099
AT1G25150	up	1.16953	0.0015052	1.19109	0.000620112	0.000998262	0.0215664	2.7209	2.48897	2.38826	2.82333	3.18305	3.39277	3.52758	0	-0.535319	-0.767758	0.236406	1.06667	1.55071	1.86187	1.70629
AT5G01720	up	1.20962	0.0422364	1.53074	0.0066855	0.00397229	0.000743691	4.6811	4.63878	3.87736	4.92429	5.28398	5.72584	6.13703	0	-0.0575962	-1.09387	0.33097	0.820493	1.42185	1.98145	1.70165
AT5G44790	up	1.24483	4.71e-05	1.00802	0.000952593	0.000221431	0.00521359	4.91294	4.85728	4.24756	5.15843	5.3885	5.96775	5.8468	0	-0.0950531	-1.13617	0.419183	0.812036	1.80113	1.5946	1.69786
AT1G24800	up	1.2658	0.000374607	1.16681	0.000634028	0.000356195	0.00548379	2.64593	2.39983	2.26639	2.80825	3.10925	3.39277	3.4405	0	-0.541624	-0.835299	0.357236	1.01969	1.64366	1.7487	1.69618
AT5G45100	up	1.47636	0.000392447	1.43281	0.000456612	5.99847e-05	0.000114638	5.51182	5.16604	5.02524	5.69149	6.16451	6.51569	6.5929	0	-0.562583	-0.791673	0.292326	1.06193	1.6333	1.75892	1.69611
AT5G16680	up	1.01944	0.0154401	1.79179	2.52e-06	0.0220755	0.0427956	3.86929	3.52384	3.67972	3.97103	4.30257	4.40166	5.16745	0	-0.637192	-0.349671	0.187661	0.799203	0.981967	2.39449	1.68823
AT1G13390	up	1.24061	0.0208671	1.33483	0.00998192	0.0152158	0.042382	4.77963	4.6745	4.09037	5.07539	5.27824	5.7404	5.88553	0	-0.171421	-1.12394	0.482285	0.813072	1.56668	1.80334	1.68501
AT2G24260	up	1.16061	0.00336885	1.3719	0.000142276	0.0054684	0.0281935	2.32124	2.13387	1.86556	2.43673	2.84878	3.02329	3.34952	0	-0.364468	-0.886401	0.224664	1.0262	1.36567	2.00027	1.68297
AT3G55890	up	3.525	0.000761025	2.31659	0.0306801	0.000144233	0.0396142	2.48609	2.02034	1.32553	3.14754	3.45095	5.09134	4.04127	0	-0.375044	-0.934532	0.532629	0.776947	2.09785	1.2523	1.67507
AT1G03960	up	1.0247	0.0447316	1.55379	0.000320434	0.025458	0.00147346	1.89866	1.56049	1.93397	2.08102	2.01917	2.24523	2.78337	0	-0.918394	0.0958945	0.495228	0.327272	0.941187	2.40264	1.67192
AT1G61800	up	1.99762	0.0330692	3.63338	2.57e-05	0.000903715	0.00115533	5.18038	4.90207	3.99096	5.02457	6.80393	6.96569	8.52048	0	-0.181437	-0.775409	-0.101575	1.05842	1.16388	2.17748	1.67068
AT1G24881	up	1.24328	0.000348771	1.06984	0.0014762	0.000928587	0.00207397	2.60553	2.36693	2.22773	2.76901	3.05845	3.32569	3.31639	0	-0.553691	-0.876723	0.379375	1.05104	1.67119	1.64962	1.66041
AT1G25055	up	1.24328	0.000342537	1.05569	0.00173045	0.0009074	0.00179745	2.60344	2.36693	2.223	2.76538	3.05845	3.32569	3.30106	0	-0.550809	-0.885996	0.377135	1.05967	1.68205	1.62469	1.65337
AT5G17280	up	2.06814	1.49e-21	1.08764	1.32e-06	1.22493e-06	0.00346261	4.96272	4.51209	4.51422	5.38012	5.44446	6.4068	5.58766	0	-0.688148	-0.684893	0.637391	0.735651	2.20522	0.954318	1.57977
AT5G47430	up	1.36559	2.82e-05	2.01323	7.84e-11	0.00796675	0.0218414	5.86031	5.30016	5.50703	6.39563	6.2384	6.51275	7.17477	0	-0.889976	-0.561298	0.850545	0.600729	1.03663	2.08847	1.56255
AT1G48040	up	1.08272	0.00503492	1.63202	3.66e-06	0.00351185	0.0336809	3.58684	3.20964	3.20479	3.98667	3.94623	4.09775	4.66687	0	-0.73436	-0.743805	0.77845	0.699715	0.994695	2.10273	1.54871
AT4G39364	up	1.51155	0.00763684	2.50111	1.4e-07	0.0200436	2.55455e-07	1.65546	1.17225	1.49487	1.86584	2.08887	2.07338	3.02872	0	-0.83337	-0.276958	0.362841	0.747488	0.720777	2.36842	1.5446
AT3G29000	up	2.36781	0.0466432	2.34703	0.0428841	0.0259145	0.015785	4.03641	3.25833	4.44548	5.05772	3.38409	5.35546	5.42968	0	-0.879464	0.462382	1.1544	-0.737313	1.49094	1.57483	1.53288
AT5G17450	up	1.42554	0.00689609	2.32101	1.26e-06	0.00328741	0.00310083	2.6975	2.46719	1.73403	2.7792	3.80957	3.60964	4.52487	0	-0.248708	-1.04043	0.0882323	1.2009	0.985008	1.97335	1.47918
AT5G10625	up	2.19725	0.0313375	2.58579	0.00810763	0.0031195	0.00298768	3.42453	3.12988	1.3511	3.65322	5.56392	5.24126	5.71698	0	-0.187884	-1.32211	0.145822	1.36417	1.15843	1.46177	1.3101
AT5G36002	down	-3.02834	0.0081943	-2.83319	0.00247288	0.00642684	0.0111952	1.93049	1.88927	1.91475	1.87587	2.04208	0.36429	0.444525	0	-0.0571118	-0.0218118	-0.0756714	0.154595	-2.1699	-2.05874	-2.11432
AT1G29070	down	-1.74297	0.000376613	-2.0768	1.19e-05	0.0103808	6.3819e-09	8.75043	8.6043	8.82547	8.82739	8.74457	6.77645	6.62439	0	-0.150623	0.0773401	0.0793245	-0.006042	-2.03458	-2.19131	-2.11295
AT4G33220	down	-3.79919	7.37e-10	-4.00822	2.4e-11	0.00225747	0.0436968	6.69438	6.93195	6.73092	6.7213	6.39335	3.10149	2.82543	0	0.134402	0.0206708	0.0152308	-0.170304	-2.03261	-2.18879	-2.1107
AT3G60530	down	-3.25128	8.33e-07	-3.10822	4.49e-07	3.38969e-08	0.0275928	4.6034	4.45814	4.90007	4.45954	4.59584	1.71246	1.67481	0	-0.105292	0.215041	-0.104273	-0.00547614	-2.09552	-2.1228	-2.10916
AT1G70370	down	-2.96146	3.84e-07	-2.89679	2.9e-07	0.0147705	0.0244245	6.02452	6.17036	6.22397	5.90758	5.79618	3.10565	3.38471	0	0.110423	0.151016	-0.0885426	-0.172897	-2.2101	-1.9988	-2.10445
AT1G78460	down	-3.97236	3.45e-10	-3.80619	1.25e-10	1.77612e-06	0.0268716	5.24757	5.41895	5.54966	5.12377	4.89791	1.79479	1.85253	0	0.105307	0.185625	-0.0760725	-0.214859	-2.12164	-2.08616	-2.1039
AT1G20010	down	-3.5861	5.86e-10	-4.19024	2.08e-13	9.23246e-08	0.0260069	5.5482	5.26361	5.85154	5.51219	5.56546	2.03315	1.46115	0	-0.157448	0.167825	-0.0199253	0.00954844	-1.94471	-2.26117	-2.10294
AT1G78450	down	-5.95739	2.41e-05	-8.26812	4.47e-08	2.80607e-08	1.87161e-10	3.72078	3.78896	4.08816	3.37057	3.63543	0.25919	0	0	0.0399246	0.215121	-0.205069	-0.0499767	-2.02698	-2.17875	-2.10287
AT5G66750	down	-2.46365	0.0142392	-2.59969	0.00511245	0.0259355	7.84359e-07	2.38104	2.30288	2.59612	2.28435	2.34082	0.711016	0.791541	0	-0.100795	0.277352	-0.124693	-0.0518638	-2.15358	-2.04974	-2.10166
AT2G35700	down	-2.15344	0.0178206	-2.13893	0.00717747	0.00131968	0.025563	1.93719	1.99443	2.015	1.76207	1.97724	0.682414	0.652558	0	0.0947099	0.128751	-0.289743	0.0662816	-2.07617	-2.12557	-2.10087
AT3G46780	down	-3.1142	1.01e-11	-3.89307	2.18e-18	2.67236e-08	0.000929245	8.50755	8.39519	8.72348	8.23345	8.67808	5.22808	4.57856	0	-0.0654281	0.12574	-0.15961	0.0992988	-1.90965	-2.28787	-2.09876
AT3G16250	down	-3.42002	4.26e-09	-3.63837	9.98e-11	0.011879	0.00181998	5.48186	5.72429	5.75526	5.28916	5.15874	2.39045	2.40173	0	0.164883	0.185942	-0.131062	-0.219764	-2.10254	-2.09486	-2.0987
AT5G26230	down	-3.2717	0.00208494	-3.91734	0.000218222	0.0032918	0.00411063	2.47129	2.61705	2.63123	2.30286	2.33403	0.553823	0.321898	0	0.150419	0.165047	-0.173821	-0.141645	-1.97876	-2.2181	-2.09843
AT4G01050	down	-1.5631	7.5e-06	-1.6648	1.01e-06	1.11945e-08	0.0261112	8.53712	8.56804	8.7208	8.30288	8.55678	6.91316	6.90672	0	0.0397969	0.236462	-0.301562	0.0253033	-2.09065	-2.09894	-2.09479
AT2G27810	down	-2.06654	0.000144304	-1.92588	6.35e-05	0.00324441	0.0499517	3.1595	3.25155	3.08597	3.33685	2.96362	1.49854	1.63329	0	0.120893	-0.0965612	0.23291	-0.257242	-2.18132	-2.00436	-2.09284
AT1G49600	down	-1.21395	0.00912743	-1.27603	0.00459796	0.000346617	0.027864	6.30256	6.17473	6.47146	6.3937	6.17033	4.87322	4.92801	0	-0.190808	0.252132	0.13605	-0.197375	-2.1336	-2.05181	-2.0927
AT3G50240	down	-2.5517	0.0206354	-2.80556	0.00609215	9.55422e-06	0.022251	2.09155	2.08581	2.23755	2.184	1.85884	0.598259	0.53597	0	-0.00787716	0.2004	0.126895	-0.319418	-2.04974	-2.13524	-2.09249
AT3G49670	down	-3.05213	6.53e-05	-3.92961	3.2e-07	0.00308922	1.17473e-07	4.59686	4.23574	5.02342	4.58674	4.54155	1.54404	1.15025	0	-0.232509	0.274639	-0.00651613	-0.0356137	-1.96555	-2.21909	-2.09232
AT1G18415	down	-2.09041	0.00348701	-1.711	0.00854901	1.35866e-07	0.00221619	3.06019	3.02144	3.08021	2.97275	3.16635	1.41279	1.76612	0	-0.0550974	0.0284693	-0.124333	0.150961	-2.34257	-1.84015	-2.09136
AT5G28290	down	-3.17312	0.00454525	-3.08479	0.00157885	0.000912233	1.51951e-05	2.27752	2.19521	2.49915	2.04248	2.37323	0.463153	0.557134	0	-0.097342	0.262122	-0.277979	0.113198	-2.14583	-2.03468	-2.09025
AT1G77060	down	-2.54229	3.11e-09	-3.21931	3.31e-14	1.16615e-06	0.015111	5.23687	5.06016	5.60455	5.25915	5.02362	2.64986	2.14883	0	-0.130076	0.270646	0.0164027	-0.156972	-1.9043	-2.27311	-2.0887
AT2G29180	down	-2.22399	4.82e-06	-2.98121	2.89e-10	0.00124963	0.0207832	6.638	6.49535	6.91145	6.54552	6.59969	4.27566	3.64157	0	-0.111178	0.213112	-0.0720781	-0.0298561	-1.84109	-2.33528	-2.08819
AT5G67070	down	-3.41454	1.09e-05	-3.40947	5.75e-06	0.018723	0.00028665	5.50012	5.50218	5.90653	5.03678	5.555	2.12774	2.46578	0	0.00133921	0.264906	-0.302016	0.0357716	-2.19818	-1.97784	-2.08801
AT1G53840	down	-2.42734	6.78e-07	-2.96514	4.74e-10	5.68628e-08	0.0172068	5.46051	5.54395	5.78252	5.26107	5.2545	3.15074	2.75287	0	0.0694388	0.267976	-0.165976	-0.171439	-1.92219	-2.25331	-2.08775
AT5G58480	down	-3.58341	1.83e-06	-3.34935	3.16e-07	0.00138044	0.0229613	3.63031	3.59304	4.07527	3.306	3.54694	0.901808	0.985849	0	-0.0289625	0.345738	-0.251995	-0.0647802	-2.12008	-2.05478	-2.08743
AT2G45470	down	-4.00993	3.73e-07	-4.10038	8.88e-08	0.0093773	0.000797676	6.82754	6.64467	7.54638	6.48168	6.63742	2.49887	2.83096	0	-0.0916917	0.360441	-0.173419	-0.0953302	-2.17048	-2.00396	-2.08722
AT1G29920	down	-3.40362	1.18e-12	-3.53437	4.84e-14	1.10565e-05	0.0240098	13.1575	13.4349	13.5596	12.8614	12.7741	9.91587	9.70899	0	0.173099	0.250867	-0.184745	-0.239222	-2.02246	-2.15154	-2.087
AT5G66560	down	-2.50187	5.74e-05	-3.53348	3.37e-08	4.73805e-06	0.00300899	4.22002	3.94418	4.19047	4.26359	4.48183	1.83144	1.24505	0	-0.214646	-0.0229922	0.0339066	0.203731	-1.8587	-2.31501	-2.08686
AT5G38420	down	-3.55996	3.45e-10	-4.29617	6.07e-15	0.00513132	0.00028502	10.5198	11.0273	10.5433	10.3543	10.1545	7.28131	6.78474	0	0.30369	0.014016	-0.099086	-0.21862	-1.93812	-2.2353	-2.08671
AT2G25480	down	-2.43239	0.00146324	-2.47556	0.000326051	1.85126e-05	0.0343773	2.84083	2.68618	3.10607	2.9665	2.60457	0.942354	0.887677	0	-0.167541	0.287348	0.136145	-0.255953	-2.05669	-2.11592	-2.08631
AT3G06130	down	-3.47125	0.000148292	-5.40727	7.22e-07	8.30621e-09	6.01166e-09	4.10275	3.66142	4.25469	4.14224	4.35267	1.09798	0.429059	0	-0.27572	0.0949226	0.0246667	0.15613	-1.87719	-2.2951	-2.08614
AT3G43720	down	-2.61271	3.77e-05	-2.75826	7.98e-06	0.0011257	2.47886e-07	6.74737	6.61727	7.16765	6.84364	6.36094	3.95779	4.04365	0	-0.0987527	0.318999	0.0730654	-0.293312	-2.11735	-2.05218	-2.08477
AT3G15190	down	-1.56631	0.000362219	-1.78505	2.74e-05	0.00481094	0.00837318	7.71593	7.6	8.03204	7.51922	7.71245	5.95189	5.89215	0	-0.134693	0.367279	-0.228544	-0.00404273	-2.04958	-2.11899	-2.08428
AT5G10605	down	-4.51904	5.83e-05	-4.28001	1.17e-05	1.04179e-08	0.000319693	3.71031	3.31684	4.09987	3.40851	4.01602	0.496186	0.534756	0	-0.256664	0.254112	-0.196863	0.199415	-2.09657	-2.07142	-2.08399
AT3G17840	down	-3.9089	1.63e-05	-4.08267	2.03e-06	0.0126241	1.30577e-06	3.79067	4.16686	4.02367	3.56449	3.40764	0.868152	0.994591	0	0.274096	0.169768	-0.164792	-0.279072	-2.12935	-2.03722	-2.08329
AT5G15310	down	-2.39288	0.00115529	-2.73936	0.000113061	0.0163997	0.0165962	4.43587	4.1389	4.90312	4.26435	4.4371	1.85825	1.6901	0	-0.232409	0.365674	-0.134232	0.000967142	-2.01728	-2.14887	-2.08307
AT1G31330	down	-2.29515	4.92e-06	-2.79429	9.93e-09	2.61169e-05	0.0263757	10.6721	10.8501	10.9247	10.5725	10.3413	8.43344	8.02964	0	0.151846	0.215519	-0.0850319	-0.282333	-1.91051	-2.25512	-2.08282
AT1G08380	down	-2.00367	4.94e-06	-2.55178	1.82e-09	0.000540001	0.0369713	10.7395	10.8717	10.9337	10.7009	10.4517	8.75282	8.28906	0	0.12413	0.182317	-0.0362749	-0.270172	-1.86482	-2.30014	-2.08248
AT4G37110	down	-2.92695	0.000825956	-3.42599	5.6e-05	0.000963439	1.05388e-05	3.12371	2.83281	3.44823	2.90299	3.31082	0.839501	0.691293	0	-0.25679	0.286459	-0.194836	0.165167	-2.01633	-2.14716	-2.08174
AT3G50270	down	-2.19519	0.000982505	-3.01722	5.31e-06	0.00203077	0.0118487	3.65659	3.73082	3.37577	3.73835	3.78141	1.78102	1.27183	0	0.0725199	-0.274348	0.0798787	0.12195	-1.83234	-2.3298	-2.08107
AT1G72640	down	-1.73698	8.99e-08	-1.8933	9.37e-10	0.0021185	0.0169427	5.19389	5.32287	5.43208	4.98993	5.03067	3.55293	3.54384	0	0.16311	0.301218	-0.257925	-0.206403	-2.07514	-2.08664	-2.08089
AT4G22290	down	-3.01853	4.97e-07	-3.54648	1.69e-09	5.57512e-07	0.000138355	3.69436	3.76401	4.1014	3.35237	3.55967	1.28825	1.05016	0	0.0573939	0.335414	-0.281816	-0.110992	-1.98275	-2.17894	-2.08084
AT3G03850	down	-6.23582	0.000102038	-6.69768	1.94e-05	1.06223e-07	8.0024e-08	3.15834	3.19389	3.64276	3.14212	2.65461	0.132952	0.126803	0	0.0244117	0.332716	-0.0111448	-0.345983	-2.07795	-2.08217	-2.08006
AT1G30610	down	-1.1831	0.0217559	-1.0962	0.016623	0.0111969	0.000758771	2.79932	2.74011	2.95434	2.76428	2.73857	1.69864	1.90615	0	-0.123513	0.323343	-0.0731019	-0.126728	-2.2958	-1.86297	-2.07938
AT5G18030	down	-3.86924	2.74e-05	-6.22134	3.43e-08	0.022871	4.0631e-05	4.12426	4.42945	4.47935	3.70699	3.88125	1.01569	0.393861	0	0.185524	0.215858	-0.25366	-0.147722	-1.8897	-2.26771	-2.07871
AT3G12690	down	-1.69372	0.0154077	-2.30436	0.000667092	0.0281219	0.0247143	2.85954	2.61593	2.84262	2.91454	3.06509	1.32936	1.00036	0	-0.2988	-0.0207615	0.0674546	0.252107	-1.87684	-2.28036	-2.0786
AT1G61170	down	-2.16293	0.000268434	-2.55364	7.42e-06	0.00204714	0.000242436	4.02771	3.62905	4.37161	3.97204	4.13813	1.76574	1.61475	0	-0.354481	0.30579	-0.0494954	0.0981868	-2.01129	-2.14554	-2.07841
AT4G12800	down	-1.92188	1.92e-06	-2.0093	3.66e-07	0.000306762	0.0462684	11.2165	11.377	11.4869	11.0489	10.9532	9.33863	9.33708	0	0.177574	0.299174	-0.185413	-0.291335	-2.07755	-2.07927	-2.07841
AT2G32100	down	-4.65233	8.64e-06	-5.37624	3.81e-07	0.00282029	7.68873e-08	3.62241	4.10717	3.81187	3.20427	3.36632	0.626384	0.523806	0	0.330627	0.129225	-0.285187	-0.174665	-2.04343	-2.11339	-2.07841
AT4G26530	down	-3.31526	7.68e-07	-4.09551	3.5e-10	0.00270151	0.000309476	7.65214	7.61662	8.07583	7.0211	7.89502	4.19267	3.64065	0	-0.0197563	0.235649	-0.35098	0.135087	-1.92413	-2.23117	-2.07765
AT5G17870	down	-1.2303	0.000535702	-1.42952	3.19e-05	0.0059495	0.0405908	8.95803	8.60867	9.0392	9.09329	9.09095	7.28069	7.2035	0	-0.422963	0.0982782	0.163757	0.160927	-2.03072	-2.12417	-2.07744
AT2G44230	down	-2.75075	3.16e-08	-3.33636	8.61e-12	8.17676e-05	0.0152068	4.83147	4.93931	5.23861	4.57848	4.56948	2.32295	1.81847	0	0.081132	0.306321	-0.190342	-0.197111	-1.88733	-2.26688	-2.0771
AT4G34220	down	-4.18364	7.07e-07	-5.29549	2.5e-09	0.00474213	5.72804e-08	4.43937	4.65469	4.98714	3.92671	4.18896	1.05407	0.691293	0	0.125364	0.318926	-0.298491	-0.1458	-1.97103	-2.18225	-2.07664
AT4G24770	down	-1.74742	2.47e-07	-2.01667	8.72e-10	0.00037829	0.00532064	9.17692	9.03067	9.5976	9.03073	9.04867	7.19644	7.06723	0	-0.148477	0.427102	-0.148416	-0.130208	-2.0107	-2.14187	-2.07629
AT5G01530	down	-1.69311	1.2e-06	-1.9174	1.65e-08	2.24202e-05	0.00959197	10.9139	10.9776	11.2184	10.8232	10.6364	9.17744	9.09597	0	0.074438	0.355726	-0.105955	-0.32421	-2.02854	-2.12371	-2.07612
AT5G18080	down	-4.02827	4.57e-05	-4.9251	1.26e-06	0.0129117	3.3495e-07	3.61892	3.91811	4.0337	3.24604	3.27784	0.693179	0.574086	0	0.20806	0.288445	-0.259311	-0.237193	-2.03463	-2.11745	-2.07604
AT5G13140	down	-4.77056	4.83e-07	-8.40997	2.54e-09	0.000281562	5.49144e-11	5.63776	5.45957	6.25447	5.12265	5.71437	1.3913	0.2107	0	-0.0764792	0.264683	-0.221083	0.0328795	-1.82254	-2.32924	-2.07589
AT2G34860	down	-2.01132	1e-10	-2.2781	4.09e-14	0.00250412	0.00311941	7.68632	7.72745	8.04712	7.33537	7.63536	5.64816	5.54904	0	0.0408709	0.358589	-0.348807	-0.0506532	-2.02571	-2.12422	-2.07497
AT5G56780	down	-3.3522	0.010128	-1.88418	0.0120695	0.000195359	0.00737455	1.73173	1.69162	1.74886	1.66169	1.82474	0.2624	0.667061	0	-0.0656757	0.0280546	-0.114678	0.152299	-2.40598	-1.74336	-2.07467
AT1G23170	down	-1.82807	0.0161864	-2.84746	0.000215784	4.98173e-05	1.34748e-08	2.98914	2.80971	2.95837	2.96147	3.22701	1.43261	0.9677	0	-0.20798	-0.0356686	-0.0320681	0.275717	-1.80418	-2.34307	-2.07362
AT5G47190	down	-1.79841	0.000132001	-2.21021	1.17e-06	0.00519261	0.017905	8.07651	8.07364	8.46604	7.84977	7.9166	6.18672	5.88651	0	-0.00291766	0.39544	-0.230183	-0.162339	-1.91846	-2.22322	-2.07084
AT5G19220	down	-1.98756	1.17e-06	-2.96801	1.89e-13	0.0380354	0.0016327	5.75938	5.7636	6.13833	5.47657	5.65902	3.57258	2.97282	0	0.00351465	0.315456	-0.235425	-0.0835453	-1.82041	-2.31968	-2.07004
AT1G64720	down	-2.05654	1.18e-07	-2.40365	1.81e-10	0.000463472	0.0397376	9.05256	9.36308	9.18556	8.73601	8.92558	7.21169	6.96165	0	0.326881	0.140006	-0.333222	-0.133664	-1.93782	-2.20102	-2.06942
AT5G15580	down	-6.56923	0.000197844	-7.03109	4.48e-05	4.58494e-06	4.58494e-06	2.72809	2.36732	3.28626	2.45495	2.80381	0	0	0	-0.273428	0.423043	-0.207008	0.0573931	-2.06763	-2.06763	-2.06763
AT3G53190	down	-4.03829	0.00168467	-7.23394	2.32e-05	0.000429469	3.12125e-08	3.84769	3.45056	4.52067	3.63409	3.78542	0.71727	0.118111	0	-0.239285	0.405505	-0.128701	-0.0375182	-1.88622	-2.24724	-2.06673
AT3G16370	down	-3.79675	4.42e-06	-5.48523	9.03e-12	0.0486071	5.13632e-07	8.02963	8.2631	8.92401	7.48144	7.44999	3.5368	3.01848	0	0.101517	0.388898	-0.23837	-0.252044	-1.9536	-2.17897	-2.06628
AT3G28420	down	-3.10989	0.00820459	-2.69386	0.0039512	0.0143673	0.00969518	2.02008	1.92147	2.38135	1.96976	1.80776	0.322485	0.440009	0	-0.124314	0.455402	-0.063442	-0.267646	-2.13996	-1.99181	-2.06589
AT2G37640	down	-5.50042	1.3e-05	-4.89325	7.4e-06	1.18626e-05	0.000122529	4.14026	3.96596	4.76587	3.47338	4.35584	0.448322	0.658654	0	-0.100387	0.36031	-0.384081	0.124158	-2.12633	-2.00519	-2.06576
AT5G64740	down	-1.00978	0.0132158	-1.33237	0.00057356	1.88621e-06	0.000364961	6.44858	6.26517	6.71918	6.33675	6.47324	5.17711	5.00901	0	-0.279484	0.412333	-0.170417	0.0375687	-1.93746	-2.19362	-2.06554
AT5G14320	down	-1.56301	2.03e-05	-1.9897	2.01e-08	0.00100049	0.0085278	8.31359	8.35393	8.64289	8.08822	8.16931	6.72628	6.4539	0	0.0483377	0.394564	-0.270031	-0.172871	-1.90187	-2.22823	-2.06505
AT1G21500	down	-2.8992	2.83e-09	-4.42503	2.08e-20	2.1897e-09	0.0027298	8.00212	7.94645	8.19908	8.06077	7.80219	5.02149	3.67466	0	-0.0314543	0.111282	0.0331371	-0.112965	-1.68408	-2.44505	-2.06456
AT2G29050	down	-2.75486	0.000605599	-2.98446	8.44e-05	0.00911916	0.000443956	3.16439	3.2366	3.58923	3.00288	2.82885	1.06728	1.10053	0	0.0716372	0.421475	-0.16023	-0.332882	-2.08051	-2.04752	-2.06401
AT4G12880	down	-3.10806	1.12e-06	-2.56264	3.52e-05	3.89536e-06	0.0444112	6.05106	5.99014	6.66297	5.71956	5.83157	3.02729	3.41837	0	-0.0444359	0.446324	-0.241794	-0.160094	-2.20552	-1.92027	-2.06289
AT1G77870	down	-4.19169	0.0175709	-5.61535	0.00080311	0.000335751	0.000100087	1.57033	1.52883	1.84903	1.62354	1.2799	0.132952	0	0	-0.056895	0.382179	0.072966	-0.39825	-1.97103	-2.15334	-2.06219
AT4G02130	down	-1.62653	0.000158497	-2.26521	4.83e-08	1.89164e-09	0.0206302	6.52572	6.35412	6.45039	6.91172	6.38664	4.66134	4.10054	0	-0.164938	-0.0724101	0.371027	-0.133679	-1.79204	-2.33109	-2.06157
AT3G02250	down	-2.92113	3.59e-06	-2.53515	4.85e-06	7.74401e-08	0.00104459	3.81605	3.76797	4.31732	3.68139	3.49751	1.35049	1.66006	0	-0.0428863	0.447141	-0.120114	-0.284141	-2.19931	-1.92317	-2.06124
AT5G54569	down	-1.63228	0.0241964	-1.44058	0.027039	0.0285309	0.000395124	2.69208	2.49653	2.94423	2.62669	2.70086	1.22574	1.48859	0	-0.301939	0.389339	-0.100966	0.0135659	-2.26409	-1.85823	-2.06116
AT5G18010	down	-5.47744	0.00120513	-5.93929	0.000313362	3.88049e-05	3.88049e-05	1.51751	1.76068	1.68082	1.39662	1.23192	0	0	0	0.330273	0.221814	-0.164193	-0.387894	-2.06112	-2.06112	-2.06112
AT4G38770	down	-4.04943	5.86e-07	-4.83361	8.72e-10	0.0351502	0.00280576	8.23734	8.6209	9.04105	7.59378	7.69364	3.92138	3.82715	0	0.181184	0.379652	-0.304003	-0.256832	-2.03875	-2.08326	-2.06101
AT1G45010	down	-2.87548	0.000349859	-4.51939	4.08e-08	0.0490097	0.00904374	4.77814	4.89382	5.34477	4.5203	4.35369	1.83933	1.06734	0	0.0716959	0.3512	-0.159815	-0.263081	-1.82151	-2.3	-2.06076
AT4G12730	down	-3.08486	0.000200138	-4.13596	3.32e-07	2.08358e-06	0.00462899	6.73863	5.96512	7.28934	6.90843	6.79164	3.0029	2.00979	0	-0.376621	0.268138	0.0826732	0.0258097	-1.8189	-2.30245	-2.06068
AT1G15820	down	-2.5169	1.38e-06	-3.46593	5.02e-12	0.00237408	0.0221601	10.4124	10.5783	10.7723	10.2425	10.0563	7.90408	7.0313	0	0.116123	0.251861	-0.118855	-0.249128	-1.75507	-2.36576	-2.06042
AT4G27060	down	-1.3655	0.000917247	-1.60554	4.34e-05	0.000102946	0.0383821	4.63548	4.644	4.8557	4.33569	4.70652	3.3182	3.1442	0	0.0124983	0.323068	-0.439788	0.104221	-1.93246	-2.18772	-2.06009
AT1G76100	down	-1.90029	1.96e-06	-2.21063	1.23e-08	8.835e-08	0.0226493	7.99638	8.15394	8.31859	7.89479	7.6182	6.1507	5.90383	0	0.164827	0.337083	-0.106276	-0.395635	-1.93085	-2.18911	-2.05998
AT1G55260	down	-3.64889	6.26e-07	-3.35139	2e-06	0.0171447	0.00984393	5.76265	5.82191	6.24805	5.09812	5.8825	2.16026	2.76691	0	0.0370028	0.303075	-0.414912	0.0748342	-2.24923	-1.87046	-2.05985
AT4G31270	down	-1.24962	0.0120254	-1.70365	0.000308071	0.0345903	0.0439983	3.77226	3.52498	4.08273	3.68012	3.80118	2.32305	2.05689	0	-0.321901	0.404181	-0.119939	0.0376586	-1.88658	-2.23307	-2.05983
AT4G28080	down	-3.24819	4.47e-13	-2.55477	6.56e-09	3.23787e-10	0.00751206	7.81702	8.04865	7.97256	7.44028	7.80657	4.81408	5.62202	0	0.183577	0.123277	-0.298577	-0.00827763	-2.37993	-1.73961	-2.05977
AT5G07590	down	-3.31602	0.000119906	-2.43648	0.000779025	0.025853	0.0042276	3.3556	3.22258	3.75687	3.18687	3.25609	0.683389	1.35857	0	-0.117327	0.353928	-0.148831	-0.0877707	-2.35697	-1.76144	-2.05921
AT1G07320	down	-2.37081	8.7e-08	-2.8812	2.02e-11	1.08871e-05	0.0216692	7.54545	7.59859	8.07187	7.28628	7.22505	5.18692	4.76244	0	0.0425681	0.421662	-0.20759	-0.25664	-1.88917	-2.22919	-2.05918
AT3G03710	down	-1.81028	7.65e-05	-1.49923	0.000709248	8.48589e-05	0.0297487	5.45832	5.20417	5.81266	5.32107	5.49539	3.40072	3.78969	0	-0.280825	0.391525	-0.151657	0.0409569	-2.27356	-1.84377	-2.05867
AT2G45180	down	-2.77495	2.21e-06	-4.53778	5.64e-16	0.0130635	1.38941e-05	10.2341	10.1979	10.3586	10.4254	9.95456	7.18485	5.73851	0	-0.019779	0.0679371	0.104389	-0.152547	-1.66382	-2.45301	-2.05841
AT3G06750	down	-2.33395	0.000559855	-3.81178	8.15e-09	0.0499801	0.00696687	5.72231	5.90461	5.90578	5.74213	5.33672	3.30754	2.32481	0	0.129121	0.12995	0.0140402	-0.273112	-1.71038	-2.40644	-2.05841
AT1G12500	down	-2.463	0.00027818	-3.46647	3.3e-07	0.0130236	4.08967e-06	4.21618	4.23619	4.65122	4.20254	3.77478	1.97575	1.46108	0	0.016488	0.358496	-0.0112445	-0.363739	-1.84625	-2.27037	-2.05831
AT2G01590	down	-3.34672	5.86e-12	-3.40316	1.38e-13	0.00626626	0.0181821	5.2611	5.5316	5.77666	5.09022	4.64593	2.27696	2.24727	0	0.185639	0.353825	-0.117276	-0.422188	-2.04799	-2.06837	-2.05818
AT1G29670	down	-4.7223	1.02e-11	-4.78046	8.54e-13	2.31097e-07	8.20293e-05	6.74126	6.75775	7.74315	6.51529	5.94885	2.27901	2.2435	0	0.00757474	0.460149	-0.103784	-0.36394	-2.04942	-2.06574	-2.05758
AT4G05330	down	-1.85921	0.00087628	-2.37788	1.09e-05	1.08679e-07	7.90754e-06	3.93197	3.48388	4.28892	3.93777	4.01731	1.96501	1.70291	0	-0.439438	0.350056	0.00568956	0.0836929	-1.92896	-2.186	-2.05748
AT2G35620	down	-2.45007	4.31e-06	-2.55872	2.68e-07	0.019952	0.0363397	3.79666	3.94168	4.2287	3.52746	3.48881	1.71804	1.63132	0	0.140609	0.418889	-0.261015	-0.298483	-2.01539	-2.09947	-2.05743
AT3G53240	down	-3.20303	4.04e-06	-2.68634	5.5e-06	0.00012566	0.00120456	3.64463	3.58029	4.17174	3.28229	3.54421	1.07375	1.42511	0	-0.055259	0.4527	-0.311198	-0.0862435	-2.20798	-1.90621	-2.0571
AT3G22150	down	-2.7992	6.64e-07	-2.22483	7.32e-06	0.00438343	0.0120308	3.85764	4.0883	4.02559	3.67845	3.63821	1.62678	2.19293	0	0.243578	0.17736	-0.189222	-0.231716	-2.35581	-1.75795	-2.05688
AT3G54210	down	-1.46177	0.000129246	-1.66885	6.78e-06	0.00931546	0.00918763	8.53949	8.6586	8.8242	8.37943	8.29574	7.10531	7.0647	0	0.168391	0.402518	-0.226299	-0.34461	-2.02763	-2.08504	-2.05633
AT3G17360	down	-3.83183	0.0115191	-4.26354	0.00316412	0.000175141	0.000135779	1.69322	1.83154	1.95821	1.55597	1.42714	0.25919	0.244914	0	0.19733	0.378026	-0.195787	-0.37957	-2.0457	-2.06607	-2.05588
AT4G10340	down	-2.94288	8.43e-14	-4.11303	2.72e-27	1.40452e-07	0.0202763	12.5615	12.8273	12.8361	12.3109	12.2717	9.79927	8.64044	0	0.163538	0.168946	-0.154189	-0.178295	-1.69933	-2.41225	-2.05579
AT4G26520	down	-2.20405	2.59e-06	-1.66906	0.00013813	0.0135192	0.029872	4.79074	4.66862	5.1384	4.74492	4.61103	2.51929	3.10544	0	-0.126856	0.361129	-0.0475955	-0.186678	-2.35949	-1.75062	-2.05506
AT3G06868	down	-1.53202	0.0119293	-2.18093	0.000223963	8.69899e-06	0.000312467	3.5367	3.09814	3.78481	3.56703	3.69681	1.7538	1.43073	0	-0.463405	0.26217	0.0320497	0.169185	-1.88393	-2.2253	-2.05462
AT3G22790	down	-5.64482	0.00168126	-4.16286	0.00283004	2.60717e-06	7.56648e-06	2.75798	2.34957	3.2647	2.51672	2.90094	0.132952	0.423557	0	-0.338334	0.419767	-0.199862	0.118429	-2.17458	-1.93384	-2.05421
AT1G75680	down	-3.23485	6.51e-07	-2.74265	1.15e-05	2.64634e-08	0.00323902	5.81415	5.73367	6.48289	5.5853	5.45473	2.67849	3.15055	0	-0.0570052	0.473722	-0.162112	-0.254605	-2.22121	-1.88682	-2.05402
AT1G72410	down	-2.18197	8.62e-05	-1.80615	0.000355777	5.55657e-06	0.00296793	4.14552	3.66747	4.22667	4.37084	4.3171	1.83142	2.23432	0	-0.464781	0.0788965	0.219066	0.166818	-2.24986	-1.85814	-2.054
AT5G01240	down	-3.63478	1e-08	-3.32539	1.21e-08	0.00223264	0.0430191	4.68585	4.88972	5.22126	4.63946	3.99296	1.59326	1.7163	0	0.138143	0.362794	-0.0314347	-0.469502	-2.09554	-2.01216	-2.05385
AT5G45820	down	-2.642	1.98e-06	-3.72772	1.01e-10	0.00339174	6.05159e-09	5.14831	4.44259	5.11109	5.77043	5.26914	1.97073	1.38109	0	-0.417403	-0.0220172	0.367957	0.0714629	-1.8794	-2.22815	-2.05377
AT1G74970	down	-1.65884	0.000334693	-2.28619	2.57e-07	0.00662063	0.0471485	8.48987	8.44596	8.88568	8.33707	8.29078	6.70297	6.13544	0	-0.0435479	0.392567	-0.151555	-0.197464	-1.77227	-2.33515	-2.05371
AT1G06640	down	-2.72106	8.76e-08	-2.70863	4.08e-08	7.82739e-05	0.000346571	6.55077	6.37892	7.0708	6.021	6.73235	3.81864	3.98338	0	-0.133189	0.403042	-0.410585	0.140732	-2.11749	-1.98981	-2.05365
AT5G08835	down	-2.21657	0.000352926	-1.81038	0.00110001	0.00378257	1.26714e-06	3.55877	3.24614	3.57006	3.51501	3.90387	1.46955	1.90467	0	-0.343008	0.0123903	-0.0480104	0.378628	-2.29221	-1.81482	-2.05352
AT2G05812	down	-2.09231	0.000323881	-1.66505	0.000651752	0.00982136	0.00621057	3.20202	2.8534	3.42699	3.42887	3.09882	1.25553	1.59349	0	-0.402363	0.259654	0.261826	-0.119116	-2.24659	-1.85653	-2.05156
AT2G29310	down	-3.45118	1.51e-12	-2.6559	1.35e-09	0.000884073	0.0225143	5.36626	5.38037	5.9089	5.17529	5.00046	2.14614	2.89844	0	0.0101806	0.391415	-0.137744	-0.263851	-2.3227	-1.78006	-2.05138
AT4G38430	down	-3.16703	1.52e-10	-2.82508	1.29e-09	7.21017e-09	0.0309466	5.59493	5.69262	6.21856	5.09268	5.37587	2.65299	2.91527	0	0.0712871	0.455082	-0.366513	-0.159856	-2.14685	-1.95545	-2.05115
AT5G62350	down	-4.13318	4.84e-13	-3.48217	1.57e-10	1.44517e-07	8.60167e-09	7.20445	6.6963	7.65284	6.58078	7.88788	2.72469	3.44954	0	-0.253122	0.223352	-0.310664	0.340434	-2.23147	-1.8704	-2.05094
AT1G13640	down	-1.47666	0.00305329	-1.093	0.0275994	0.0182061	0.00761477	6.13931	6.07748	6.21541	6.01458	6.24978	4.54049	5.05157	0	-0.0944023	0.116188	-0.19044	0.168654	-2.44109	-1.66078	-2.05093
AT2G05790	down	-4.05206	6.33e-07	-4.59872	8.01e-09	0.00294035	2.85162e-06	5.40212	5.39434	6.3433	5.02865	4.84216	1.66362	1.53089	0	-0.00419185	0.507328	-0.201307	-0.30183	-2.01516	-2.0867	-2.05093
AT4G31250	down	-1.77885	0.0132457	-3.02286	0.000167733	0.0407353	4.05482e-06	2.265	2.22763	2.47907	1.98565	2.36765	0.953349	0.562636	0	-0.0508501	0.291301	-0.380134	0.139683	-1.78487	-2.31655	-2.05071
AT3G23880	down	-3.59183	9.06e-06	-5.76659	1.71e-08	0.0245863	0.000510302	3.70385	4.20115	3.94653	3.15771	3.50999	1.04963	0.428075	0	0.343764	0.167758	-0.377519	-0.134003	-1.83473	-2.26438	-2.04956
AT2G43900	down	-2.57288	2.35e-06	-1.77609	0.000506008	6.02513e-05	0.000187346	4.76928	4.59572	4.90299	4.67676	4.90165	2.33882	3.13767	0	-0.175124	0.134913	-0.093353	0.133564	-2.45236	-1.64631	-2.04934
AT3G08943	down	-2.4662	1.98e-07	-2.34797	3.15e-07	0.00150312	3.27318e-06	5.77752	6.16321	5.83513	5.3696	5.74212	3.74792	3.99726	0	0.414737	0.0619565	-0.438636	-0.0380575	-2.18241	-1.9143	-2.04836
AT5G22580	down	-4.26443	2.54e-05	-5.90167	1.1e-08	1.89276e-06	6.76027e-08	5.95635	5.89153	6.6055	4.99332	6.33504	1.96917	1.06139	0	-0.0298961	0.299401	-0.444166	0.17466	-1.83896	-2.25764	-2.0483
AT5G15230	down	-3.55737	0.000558557	-5.69532	1.63e-08	2.54585e-06	9.94329e-06	7.05681	6.48398	7.45935	7.1394	7.14449	3.45524	1.7768	0	-0.264191	0.185655	0.0380943	0.0404411	-1.66106	-2.43517	-2.04811
AT5G18660	down	-3.3981	1.92e-07	-2.94041	7.46e-07	8.30463e-05	0.00350557	4.72825	4.57651	5.44944	4.28775	4.59929	1.59076	2.00119	0	-0.105971	0.503654	-0.307627	-0.0900563	-2.19111	-1.90448	-2.04779
AT2G30424	down	-3.60436	0.00109973	-5.68779	6.29e-05	0.019973	0.000623305	2.8519	3.18833	3.22742	2.40991	2.58196	0.587823	0.227052	0	0.281745	0.314488	-0.370156	-0.226076	-1.89612	-2.19825	-2.04718
AT5G41070	down	-2.81401	0.00914516	-3.69333	0.00094324	3.03784e-06	0.000326338	2.25095	2.28228	2.6465	2.16094	1.91409	0.598077	0.335584	0	0.0359403	0.453843	-0.103274	-0.386508	-1.89648	-2.19766	-2.04707
AT2G19780	down	-2.37226	0.00603512	-3.90086	6.86e-05	0.000193691	1.70992e-07	2.85345	2.74557	2.71295	2.63074	3.32453	1.0037	0.462388	0	-0.104095	-0.135571	-0.214891	0.454558	-1.78486	-2.30718	-2.04602
AT2G33450	down	-1.42813	0.00174176	-1.62977	0.000219656	0.0234863	0.0391226	6.81292	6.96696	7.07915	6.64908	6.5565	5.46212	5.43002	0	0.230538	0.398433	-0.245201	-0.38377	-2.02163	-2.06966	-2.04564
AT4G01150	down	-1.75688	1.91e-06	-2.24887	2.87e-10	7.39391e-06	0.01168	9.65614	9.68437	10.1094	9.32475	9.50607	7.82912	7.4438	0	0.0285828	0.458952	-0.33557	-0.151965	-1.85004	-2.24021	-2.04513
AT3G21190	down	-3.95165	2.26e-07	-3.25433	2.99e-06	1.62168e-07	0.0162989	4.57707	4.75109	5.15647	3.93754	4.46319	1.4617	1.86113	0	0.122026	0.406282	-0.448452	-0.0798555	-2.18455	-1.90446	-2.0445
AT5G45930	down	-3.0175	3.55e-07	-2.51175	5.03e-06	9.33306e-05	0.0284401	4.87155	4.83285	5.52996	4.47847	4.64492	2.03683	2.4228	0	-0.0299476	0.509485	-0.304169	-0.175369	-2.19353	-1.89486	-2.0442
AT3G60390	down	-3.3726	0.00112298	-4.92781	0.000166525	0.00116108	8.16389e-07	2.98371	2.47832	3.56542	2.72709	3.16401	0.452227	0.155308	0	-0.3855	0.443713	-0.195743	0.13753	-1.93095	-2.15743	-2.04419
AT5G55230	down	-2.39736	2.1e-09	-2.01339	6.74e-08	0.00158287	0.0237033	5.54313	5.292	6.11442	5.56548	5.20063	2.90916	3.34524	0	-0.212439	0.483265	0.0189041	-0.289731	-2.22815	-1.85926	-2.04371
AT4G31890	down	-5.73322	0.000454202	-6.19508	0.000101285	5.7709e-05	5.7709e-05	1.7822	1.91232	2.13475	1.73586	1.34588	0	0	0	0.149113	0.404014	-0.0531081	-0.500019	-2.04237	-2.04237	-2.04237
AT4G17560	down	-2.19822	2.28e-06	-2.37657	1.55e-07	0.0274817	0.000596509	7.13154	7.20516	7.6979	6.78246	6.84063	4.84718	4.9088	0	0.066721	0.513253	-0.316349	-0.263625	-2.07016	-2.01432	-2.04224
AT1G01300	down	-2.86623	3.29e-07	-2.46678	2.15e-06	2.25347e-05	0.00242039	5.336	4.75373	5.6575	5.02451	5.90826	2.08293	2.5307	0	-0.392539	0.216737	-0.209991	0.385793	-2.19307	-1.8912	-2.04214
AT5G18500	down	-1.77114	6.43e-07	-2.30279	2.73e-11	1.12365e-05	0.00706749	5.40497	5.27532	5.89117	5.42696	5.02645	3.48548	3.09365	0	-0.125144	0.469278	0.0212211	-0.365356	-1.85271	-2.23091	-2.04181
AT1G55670	down	-2.09414	1.57e-05	-2.97724	1.6e-10	0.00679488	0.0196865	10.7457	11.074	10.9292	10.5358	10.4438	8.82154	8.06515	0	0.29113	0.162717	-0.186115	-0.267731	-1.70625	-2.37696	-2.0416
AT2G30420	down	-2.86971	0.0274485	-5.2435	0.00135256	0.0162278	1.1497e-07	1.93107	2.08555	2.19248	1.87768	1.56857	0.452227	0.0838966	0	0.189634	0.32089	-0.0655417	-0.444983	-1.81535	-2.2675	-2.04142
AT5G22340	down	-2.60534	9.34e-07	-2.16585	2.5e-05	7.88927e-09	0.033509	5.82868	5.83006	6.3839	5.61142	5.48932	3.30905	3.74333	0	0.00122306	0.492247	-0.192611	-0.300859	-2.23383	-1.8488	-2.04131
AT5G55540	down	-2.99899	5.82e-05	-2.52457	3.92e-05	0.00173931	0.0102809	2.96357	2.97502	3.4444	2.76516	2.66971	0.839106	1.16645	0	0.0119137	0.500527	-0.206539	-0.305902	-2.21152	-1.87077	-2.04115
AT5G67200	down	-1.96108	0.0463203	-2.28385	0.0135673	0.047341	0.0215728	2.32132	2.27584	2.71476	2.04955	2.24511	0.836754	0.832487	0	-0.0624343	0.54014	-0.373091	-0.104615	-2.03806	-2.04392	-2.04099
AT5G39210	down	-2.0324	2.96e-05	-2.65467	2.15e-08	0.0177788	0.0397697	5.28174	5.42532	5.69942	5.13528	4.86693	3.33238	2.81469	0	0.132707	0.386031	-0.135357	-0.383381	-1.80165	-2.28011	-2.04088
AT5G13100	down	-1.88284	0.000331082	-3.3467	5.98e-11	0.00912857	0.00157912	6.12825	6.06405	6.32523	6.16568	5.95804	4.083	2.92608	0	-0.0499264	0.15319	0.0291073	-0.132371	-1.59054	-2.49025	-2.04039
AT5G01790	down	-2.99331	8.51e-05	-2.94723	4.56e-05	0.00118372	0.0121623	4.43901	4.20142	4.7916	3.79705	4.96596	1.59325	1.61379	0	-0.170939	0.253682	-0.461876	0.379133	-2.04747	-2.03269	-2.04008
AT5G12470	down	-1.06249	1.31e-05	-1.3127	2.38e-08	0.0157351	0.000977145	6.95004	7.07905	7.16749	6.71196	6.84164	5.87419	5.79509	0	0.235923	0.397654	-0.435359	-0.198219	-1.96732	-2.11198	-2.03965
AT4G01460	down	-5.10253	0.00046648	-6.47689	3.65e-05	0.000547891	2.73257e-07	2.50285	3.00109	2.74666	2.12788	2.13575	0.236996	0.118111	0	0.437007	0.21385	-0.328879	-0.321977	-1.98735	-2.09163	-2.03949
AT1G13170	down	-2.53791	0.00214626	-2.31355	0.00186701	0.00676839	0.000483076	2.8315	2.82767	3.12658	2.39808	2.97367	0.974701	1.23427	0	-0.00451874	0.348331	-0.511644	0.167832	-2.19191	-1.8855	-2.0387
AT1G30380	down	-2.37158	3.36e-06	-3.03854	7.34e-10	1.04094e-05	0.0353395	10.6013	10.9303	10.9259	10.3947	10.1544	8.47818	7.84414	0	0.274848	0.27117	-0.172631	-0.373386	-1.77379	-2.3035	-2.03864
AT3G12080	down	-2.44509	6.68e-09	-1.94658	1.2e-06	6.18369e-07	4.64007e-07	5.7526	5.60684	6.26964	5.50387	5.63004	3.241	3.83679	0	-0.134209	0.476078	-0.229019	-0.11285	-2.31262	-1.76403	-2.03832
AT3G54890	down	-2.6233	8.23e-12	-2.2965	1.45e-09	0.00016641	0.00474912	10.7984	10.9467	11.3062	10.4852	10.4555	8.18592	8.68486	0	0.127917	0.438008	-0.270176	-0.295748	-2.25332	-1.82298	-2.03815
AT3G61470	down	-1.80711	6.04e-07	-2.3782	9.63e-12	1.07768e-06	0.034179	11.2477	11.4286	11.6111	11.0017	10.9494	9.50185	8.98509	0	0.183931	0.369496	-0.250124	-0.303303	-1.77512	-2.30055	-2.03784
AT4G28750	down	-1.44552	0.000350725	-2.18122	1.53e-08	0.000158921	0.0163093	10.6077	10.6858	10.9048	10.4627	10.3776	9.13136	8.52185	0	0.0893586	0.339904	-0.165933	-0.263329	-1.68908	-2.38639	-2.03773
AT3G08920	down	-2.52855	3.95e-07	-4.09913	2.28e-15	0.000520469	0.00233763	5.48997	5.54553	5.82591	5.50532	5.08312	3.05842	1.82648	0	0.0371458	0.224594	0.0102653	-0.272005	-1.62563	-2.44926	-2.03744
AT3G52500	down	-1.80071	0.000392447	-2.66724	7.2e-08	1.11664e-07	0.000900544	5.84501	5.13633	5.95763	6.10839	6.1777	3.33755	2.70312	0	-0.511123	0.0812249	0.189957	0.239942	-1.80846	-2.26603	-2.03724
AT4G12980	down	-3.31446	8.42e-08	-3.26047	4.62e-08	0.0392663	0.00573432	5.7013	6.07602	6.19808	5.45336	5.07775	2.45569	3.01137	0	0.2572	0.340982	-0.170186	-0.427996	-2.22774	-1.84633	-2.03704
AT5G58960	down	-3.02079	4.6e-05	-2.49579	3.57e-05	3.47443e-08	0.0284469	2.98192	3.04283	3.4692	2.60052	2.81513	0.869669	1.12803	0	0.062544	0.500324	-0.39161	-0.171258	-2.16879	-1.90352	-2.03615
AT5G19530	down	-2.41661	8.33e-07	-1.72194	0.000263081	0.00364035	0.0434161	5.60461	5.496	5.91691	5.26338	5.74216	3.05137	3.81771	0	-0.101891	0.292981	-0.32013	0.12904	-2.39531	-1.67638	-2.03584
AT1G70410	down	-1.89064	5.53e-07	-2.02705	3.4e-08	0.00227232	0.0155893	7.1123	7.24662	7.24797	7.37409	6.5805	5.25891	5.29389	0	0.148906	0.150405	0.290212	-0.589523	-2.05458	-2.01581	-2.0352
AT4G17810	down	-2.46504	0.000178083	-3.09904	1.68e-06	0.00131166	0.0164167	3.86407	3.87602	4.47174	3.62114	3.4874	1.67594	1.21753	0	0.0100574	0.511543	-0.204507	-0.317094	-1.84201	-2.2279	-2.03496
AT5G21222	down	-1.17002	0.00643552	-1.17769	0.00408509	0.0317676	0.0262152	4.53059	4.73031	4.61426	4.31651	4.46129	3.49666	3.63946	0	0.422147	0.176839	-0.452506	-0.14648	-2.18539	-1.88355	-2.03447
AT5G21430	down	-1.38523	0.00165181	-1.03786	0.0174805	3.14978e-06	0.0317217	6.04932	5.93705	6.33732	5.90215	6.02078	4.50129	4.92658	0	-0.171011	0.438663	-0.224174	-0.0434777	-2.35792	-1.71013	-2.03403
AT5G11410	down	-2.17447	0.0107557	-1.90624	0.00668654	0.0487606	0.0410331	2.18972	1.97455	2.56672	2.03731	2.1803	0.579323	0.865068	0	-0.298191	0.522457	-0.211212	-0.0130548	-2.23176	-1.83577	-2.03376
AT2G33855	down	-1.55752	1.77e-06	-1.8836	2.27e-09	1.88262e-06	0.0017228	6.47689	6.4906	6.88527	6.45194	6.07973	4.86234	4.68197	0	0.0163584	0.487166	-0.029757	-0.473768	-1.92599	-2.14116	-2.03358
AT3G23820	down	-1.48086	0.00679514	-2.60114	4.18e-07	0.00558506	0.0257978	7.62909	7.25554	7.86633	7.58404	7.81048	5.60849	4.58105	0	-0.29969	0.190322	-0.0361483	0.145516	-1.62105	-2.44532	-2.03318
AT1G50732	down	-1.54222	0.00224902	-2.47167	4.45e-07	4.83522e-07	0.0215885	4.85003	4.81983	5.0623	4.96292	4.55508	3.29389	2.51782	0	-0.0315878	0.221978	0.118055	-0.308445	-1.62732	-2.43888	-2.0331
AT2G39470	down	-2.02965	1.05e-09	-2.36478	2.03e-13	0.000118251	0.00375446	6.32771	6.56119	6.7347	6.07006	5.94487	4.4709	4.26817	0	0.24241	0.422557	-0.267494	-0.397472	-1.9278	-2.13828	-2.03304
AT1G43670	down	-2.03041	3.27e-10	-2.1348	9.94e-12	0.000105569	0.0473901	7.06654	7.44852	7.27211	6.73373	6.81181	5.31602	5.31229	0	0.443125	0.238475	-0.386091	-0.295509	-2.03076	-2.03509	-2.03292
AT1G29440	down	-6.14966	1.12e-05	-5.68162	3.48e-07	5.27569e-07	3.09218e-07	3.72516	3.94141	4.58913	3.20066	3.16946	0.187782	0.400222	0	0.128102	0.511816	-0.310719	-0.329199	-2.09556	-1.96971	-2.03263
AT1G78210	down	-1.35074	0.00316647	-1.82879	2.9e-05	3.87922e-08	0.00899004	4.43137	3.87055	4.62748	4.68961	4.53782	2.57877	2.24587	0	-0.564505	0.19741	0.259941	0.107154	-1.86479	-2.19988	-2.03233
AT5G50375	down	-1.70166	0.00237731	-2.83483	9.65e-07	0.0436782	0.0311103	3.33845	3.49576	3.50837	3.32656	3.0231	1.87583	1.1873	0	0.176932	0.191108	-0.0133696	-0.35467	-1.64499	-2.41938	-2.03219
AT1G15830	down	-2.67555	0.00359507	-3.58568	0.000153432	0.0396093	0.0151463	2.39769	2.72092	1.92873	2.40869	2.53242	0.765245	0.53597	0	0.375803	-0.545236	0.0127878	0.156645	-1.89796	-2.16452	-2.03124
AT4G05180	down	-1.58948	0.00039127	-2.57379	1.46e-09	0.00465492	0.0489569	9.82474	9.85915	10.1011	9.64913	9.68955	8.12008	7.1707	0	0.0320647	0.257541	-0.163635	-0.12597	-1.58844	-2.4731	-2.03077
AT3G07510	down	-1.40552	0.00447268	-1.068	0.0198144	0.0142034	0.0473786	3.74874	3.5726	4.08807	3.70494	3.62936	2.23316	2.57699	0	-0.266118	0.512659	-0.0661821	-0.180359	-2.28973	-1.77027	-2.03
AT4G36360	down	-3.95393	1.15e-07	-3.40701	1.92e-06	0.000138478	5.28103e-07	6.11237	5.83808	6.88435	5.37261	6.35442	2.29247	2.95776	0	-0.159639	0.449302	-0.430544	0.14088	-2.22322	-1.83601	-2.02962
AT4G30410	down	-4.36196	0.0064174	-3.9473	0.0047281	4.96956e-06	0.000865645	2.1181	1.64513	2.5988	2.04499	2.18348	0.132952	0.227052	0	-0.495035	0.503122	-0.0765216	0.0684341	-2.07775	-1.97926	-2.0285
AT2G37630	down	-1.39872	0.0024078	-1.82805	3.43e-05	0.00421741	0.0102017	6.00957	5.75603	6.36721	5.63283	6.28221	4.25995	4.02387	0	-0.275346	0.388401	-0.409146	0.29609	-1.90012	-2.15651	-2.02831
AT5G63810	down	-2.52287	0.0100288	-2.68372	0.00304128	0.00138148	1.42307e-06	2.55995	2.31856	3.09935	2.33021	2.49166	0.751859	0.761808	0	-0.271531	0.60677	-0.258425	-0.0768139	-2.0339	-2.02271	-2.0283
AT1G02280	down	-1.37388	0.0213283	-1.36574	0.0186167	0.0225446	1.46165e-06	6.64437	6.37422	7.10357	6.56483	6.53487	4.92873	5.14206	0	-0.340512	0.578792	-0.100262	-0.138018	-2.16246	-1.89357	-2.02802
AT2G32500	down	-2.14918	2.64e-07	-2.34346	3.15e-09	4.80146e-05	0.0459872	4.45894	4.55196	4.98243	4.11329	4.1881	2.56751	2.40387	0	0.095591	0.538002	-0.355242	-0.278352	-1.94389	-2.11207	-2.02798
AT1G55140	down	-1.46115	0.0012547	-1.50947	0.000516616	0.0138325	0.0221983	4.89324	4.90713	5.2875	4.6671	4.71123	3.43532	3.55036	0	0.0201141	0.570919	-0.327466	-0.263567	-2.11117	-1.94459	-2.02788
AT4G14200	down	-3.23764	0.00227366	-3.86968	0.000215724	0.00120108	4.28963e-06	2.96774	2.96021	3.57836	2.49756	2.83484	0.814166	0.67813	0	-0.00687448	0.557357	-0.42917	-0.121312	-1.96573	-2.0899	-2.02781
AT4G12620	down	-4.0846	0.0174531	-2.68968	0.0365785	4.39375e-05	0.0198283	1.67772	1.46422	2.06959	1.551	1.62607	0.132952	0.393861	0	-0.306095	0.561828	-0.181681	-0.0740521	-2.21475	-1.84069	-2.02772
AT2G40030	down	-2.22973	0.000384232	-2.56602	1.81e-05	1.28845e-06	0.000421441	3.2936	3.33957	3.79081	3.01788	3.02615	1.57248	1.39946	0	0.0515597	0.557725	-0.309282	-0.300002	-1.93061	-2.12469	-2.02765
AT5G62890	down	-2.40639	5.84e-09	-2.01094	3.74e-07	1.31546e-06	0.00405506	5.81581	5.85045	6.34016	5.46767	5.60495	3.46268	3.95072	0	0.0332996	0.504091	-0.334683	-0.202708	-2.2622	-1.79302	-2.02761
AT3G53170	down	-2.32931	0.0292627	-2.83909	0.0056544	0.0428818	0.00853957	1.56827	1.70771	1.78848	1.25843	1.51845	0.451933	0.368166	0	0.244067	0.385431	-0.542308	-0.0871904	-1.9539	-2.10052	-2.02721
AT1G54820	down	-4.52732	2.03e-07	-3.86024	4.17e-07	0.00738145	0.00536878	4.06164	4.57749	4.52885	3.64575	3.49447	0.822922	1.3582	0	0.351916	0.31873	-0.283722	-0.386924	-2.20947	-1.8443	-2.02689
AT5G26220	down	-2.58105	0.017735	-4.90122	1.41e-05	4.01335e-05	0.00394547	4.03602	4.22095	3.7599	4.11464	4.04859	1.95053	0.652211	0	0.137015	-0.204572	0.0582457	0.00931081	-1.54511	-2.50702	-2.02607
AT3G27160	down	-1.56185	0.000182391	-2.31221	8e-09	0.00365785	0.00814876	6.90381	6.96599	7.30524	6.75417	6.58984	5.32294	4.7487	0	0.0674161	0.435272	-0.162255	-0.340433	-1.71413	-2.33677	-2.02545
AT2G40610	down	-6.13023	7.06e-06	-7.97408	1.19e-07	0.000576263	4.5533e-07	4.66338	5.75567	4.88985	4.0735	3.9345	0.745139	0.345163	0	0.537083	0.111357	-0.290048	-0.358393	-1.92661	-2.12328	-2.02495
AT3G56160	down	-1.52468	0.0128912	-2.46066	9.03e-05	0.00025078	0.00547161	2.99568	2.60345	2.97196	3.00643	3.40087	1.3993	0.894343	0	-0.429499	-0.0259698	0.0117743	0.443694	-1.74807	-2.301	-2.02453
AT4G32280	down	-3.75394	0.0429475	-4.2158	0.0181835	0.000673359	4.74738e-05	1.2071	1.32608	1.46527	1.06827	0.968766	0.132952	0.0838966	0	0.219223	0.475673	-0.255787	-0.439109	-1.97904	-2.06942	-2.02423
AT1G78270	down	-2.31686	0.00738109	-2.10656	0.00568218	0.00441812	0.0431141	2.43238	2.37622	2.85609	2.41544	2.08176	0.835801	0.94578	0	-0.0737329	0.556319	-0.0222418	-0.460345	-2.09622	-1.95183	-2.02402
AT2G28150	down	-2.38884	0.000828774	-1.98989	0.00169852	0.00148067	9.09251e-05	3.41201	3.04942	3.9461	3.49947	3.15303	1.19501	1.53968	0	-0.358865	0.528615	0.0865702	-0.25632	-2.19425	-1.85312	-2.02369
AT5G62840	down	-2.80362	2.59e-08	-3.25197	2.9e-11	4.142e-07	0.00716943	4.26466	4.58489	4.76975	3.89351	3.81049	2.03634	1.72457	0	0.271787	0.428683	-0.315006	-0.385463	-1.89122	-2.15583	-2.02353
AT2G05810	down	-3.25042	0.011098	-3.07095	0.00488908	0.0116166	0.00277446	1.93736	1.86732	2.41224	1.64498	1.8249	0.31597	0.390626	0	-0.0894712	0.606613	-0.373488	-0.143653	-2.07117	-1.97581	-2.02349
AT5G03760	down	-3.68533	9.46e-06	-3.34669	2.5e-05	0.000343879	0.00274748	4.9475	5.09376	5.65317	4.14775	4.89532	1.77231	2.07707	0	0.0979033	0.472352	-0.535325	-0.0349299	-2.12537	-1.92137	-2.02337
AT3G56330	down	-3.64907	0.0012289	-1.96409	0.00675747	0.000143925	0.0117499	2.69242	2.3558	3.16548	2.53544	2.71298	0.361263	0.967088	0	-0.335767	0.471849	-0.156584	0.0205024	-2.32521	-1.72093	-2.02307
AT1G09160	down	-1.73625	4.44e-05	-1.56273	4.31e-05	0.000959579	0.000363918	4.03845	3.74227	4.54969	3.9996	3.86224	2.12733	2.40414	0	-0.337895	0.583245	-0.0443215	-0.201028	-2.18029	-1.86449	-2.02239
AT1G25230	down	-1.48129	0.0100208	-2.29855	2.83e-05	6.30296e-06	0.0462637	4.95318	4.83096	5.33298	4.79655	4.85222	3.45149	2.70907	0	-0.131968	0.410091	-0.169113	-0.10901	-1.62143	-2.42305	-2.02224
AT3G12820	down	-2.46362	0.00982263	-2.50075	0.00427541	0.00334691	0.0489214	2.28715	2.43453	2.60424	1.88115	2.22869	0.83589	0.790354	0	0.20217	0.434966	-0.556939	-0.0801964	-1.99078	-2.05324	-2.02201
AT1G13250	down	-3.53355	0.000324065	-3.72075	5.42e-05	9.54192e-05	1.30732e-06	3.23107	3.26515	3.93686	2.70713	3.01515	0.756309	0.761808	0	0.0278777	0.577291	-0.428556	-0.176613	-2.02421	-2.01971	-2.02196
AT1G65010	down	-2.60073	1.69e-05	-2.24122	7.76e-05	5.31961e-06	2.2172e-05	4.48595	4.42338	5.05851	4.02156	4.44036	2.09857	2.51879	0	-0.0581025	0.531665	-0.431226	-0.0423365	-2.21687	-1.82667	-2.02177
AT4G12900	down	-3.30306	0.0170928	-2.79707	0.00708773	2.3556e-05	0.00141264	2.1233	1.66162	2.59352	2.08491	2.15315	0.25919	0.368166	0	-0.515701	0.52524	-0.0428823	0.033343	-2.08221	-1.96049	-2.02135
AT5G04160	down	-3.03138	0.000616165	-3.04984	0.000253498	1.17874e-05	6.05514e-06	3.57326	3.61183	4.23205	3.07673	3.37243	1.21523	1.2984	0	0.033652	0.574842	-0.433258	-0.175235	-2.05755	-1.98498	-2.02127
AT3G12610	down	-4.48624	2.18e-08	-4.57495	1.67e-09	4.18288e-05	2.47197e-07	4.84589	5.01744	5.70619	4.77843	3.88148	1.2403	1.34208	0	0.0975493	0.489184	-0.0383568	-0.548377	-2.05019	-1.99232	-2.02126
AT1G78970	down	-6.04501	0.000464958	-3.74611	0.00599905	1.98917e-05	0.00069048	2.04453	1.91497	2.57162	1.75059	1.94094	0	0.38236	0	-0.141293	0.574834	-0.320565	-0.112977	-2.22972	-1.81273	-2.02123
AT3G02110	down	-4.04766	0.000340027	-3.49438	0.000372	0.000119864	0.00484367	3.85739	3.16416	4.75962	3.68308	3.82271	0.553823	0.818801	0	-0.441854	0.575063	-0.111103	-0.022106	-2.10564	-1.93675	-2.0212
AT4G29560	down	-2.53822	0.0285061	-2.02275	0.0217743	0.00975567	3.2985e-05	1.49813	1.47601	1.75208	1.27621	1.48823	0.361263	0.595217	0	-0.0438336	0.503121	-0.439667	-0.0196206	-2.25237	-1.78886	-2.02061
AT5G50420	down	-2.37904	4.82e-06	-1.67703	0.000140681	0.000354298	0.0184183	3.66434	3.64128	4.05012	3.64853	3.31745	1.60257	2.1741	0	-0.0262279	0.438733	-0.0179831	-0.394522	-2.34483	-1.69483	-2.01983
AT3G62630	down	-3.57262	3.44e-10	-4.07303	2.19e-13	0.000950653	8.61863e-05	4.35761	4.36827	5.30066	3.88886	3.87264	1.29926	1.15982	0	0.00688075	0.608728	-0.302569	-0.313039	-1.97412	-2.06413	-2.01912
AT5G06050	down	-2.66896	0.000146127	-1.66894	0.00309184	0.00100722	0.0355494	3.01817	2.98135	3.38	2.78435	2.927	1.00539	1.64195	0	-0.0438761	0.431119	-0.278606	-0.108637	-2.39823	-1.63977	-2.019
AT1G22590	down	-2.64485	9.11e-06	-1.99563	0.000530915	1.46815e-05	0.0364052	5.23558	5.27143	5.81335	5.00854	4.849	2.77411	3.29576	0	0.0328835	0.530042	-0.208282	-0.354643	-2.25812	-1.77957	-2.01884
AT1G06680	down	-1.7747	9.11e-06	-2.70333	1.55e-12	0.00112831	0.0384236	10.8253	11.0173	11.133	10.6459	10.5048	9.12536	8.26119	0	0.181749	0.291219	-0.169747	-0.303222	-1.60861	-2.42637	-2.01749
AT4G21280	down	-2.29334	4.47e-06	-3.53435	1.42e-13	2.76616e-05	0.024874	9.82696	10.1145	10.0335	9.73006	9.42974	7.76032	6.5625	0	0.21753	0.156283	-0.0733079	-0.300505	-1.56347	-2.46965	-2.01656
AT1G22430	down	-1.57041	0.000363892	-1.96845	3.3e-06	0.000164469	0.0075522	4.64731	4.60525	5.16433	4.47124	4.34844	3.05092	2.7578	0	-0.0486649	0.598136	-0.2037	-0.345771	-1.84687	-2.18599	-2.01643
AT1G80640	down	-3.28859	4.53e-07	-2.49775	1.06e-05	0.000219056	0.0273906	3.79502	4.08742	4.11306	3.67074	3.30885	1.38116	2.00179	0	0.280264	0.304842	-0.119119	-0.465987	-2.31367	-1.7188	-2.01623
AT1G02050	down	-1.64381	0.0198557	-1.75533	0.00759906	0.0247567	4.28534e-05	2.87784	2.9089	3.27861	2.62812	2.69572	1.52031	1.55069	0	0.0466595	0.601903	-0.375045	-0.273517	-2.03882	-1.99319	-2.016
AT3G48870	down	-3.10015	7.65e-07	-2.1208	0.000580692	0.00119731	6.92144e-05	6.44648	6.06251	6.92156	6.16587	6.63598	3.18826	4.26556	0	-0.284493	0.351998	-0.207911	0.140405	-2.4141	-1.61591	-2.015
AT2G01420	down	-3.25962	3.76e-09	-3.12628	4.17e-09	0.00013933	0.00303075	5.84316	6.10108	6.50247	5.70352	5.06556	2.89883	3.1379	0	0.183968	0.470272	-0.099597	-0.554643	-2.10013	-1.9296	-2.01487
AT4G39970	down	-1.47548	0.000161726	-2.36122	3.93e-10	2.4281e-07	0.023706	6.32223	6.12365	6.70432	5.99244	6.46853	4.64568	3.86901	0	-0.193767	0.372811	-0.321787	0.142743	-1.63586	-2.39368	-2.01477
AT1G67040	down	-3.94422	0.0247817	-3.54606	0.0235023	0.000314115	0.000111822	1.29926	1.4229	1.57271	1.18586	1.01555	0.129448	0.202008	0	0.219772	0.486036	-0.20155	-0.504259	-2.07923	-1.95026	-2.01474
AT5G06340	down	-1.65413	2.44e-06	-2.18424	1.25e-10	0.0109957	0.0474738	6.65298	6.67888	7.18778	6.29527	6.44997	4.92375	4.49785	0	0.0268724	0.554769	-0.371061	-0.21058	-1.79378	-2.23557	-2.01467
AT1G48315	down	-2.09634	0.030472	-2.79553	0.00306147	1.47446e-05	0.000106832	2.35697	2.54917	2.65001	2.07031	2.15839	1.09789	0.806589	0	0.275606	0.420217	-0.411069	-0.284754	-1.80549	-2.22321	-2.01435
AT3G06150	down	-2.35612	8.15e-06	-1.9185	6.74e-05	3.40112e-08	0.000300728	4.037	4.10912	4.21185	4.31686	3.51016	2.00598	2.4312	0	0.0798865	0.193666	0.309972	-0.583524	-2.24955	-1.77858	-2.01407
AT1G29450	down	-5.72929	3.76e-05	-5.23481	1.69e-06	1.56512e-05	3.1777e-06	3.36092	3.52754	4.24563	2.78268	2.88783	0.236996	0.368166	0	0.109674	0.582336	-0.380611	-0.311398	-2.05624	-1.96991	-2.01308
AT4G25150	down	-2.23111	0.0190478	-3.59198	0.00076267	0.00240332	0.000604852	2.09962	2.12525	2.50727	1.88682	1.87915	0.767597	0.335584	0	0.0333251	0.530021	-0.276685	-0.286661	-1.73189	-2.29359	-2.01274
AT3G19570	down	-2.36356	0.00775914	-1.90915	0.00883179	0.000331528	0.00116817	2.18101	2.00275	2.60694	2.10504	2.00931	0.683748	0.930466	0	-0.26115	0.623985	-0.111295	-0.251539	-2.19345	-1.83202	-2.01273
AT1G71720	down	-2.63484	2.52e-06	-1.8149	2.59e-05	1.03682e-09	0.00189681	3.19702	3.33088	3.51372	2.95806	2.98543	1.2318	1.84592	0	0.162434	0.3843	-0.289969	-0.256765	-2.38474	-1.63952	-2.01213
AT5G17880	down	-1.16089	0.00297436	-1.47694	6.05e-05	0.000539308	0.0226034	3.75675	3.95974	3.82792	3.79981	3.43953	2.79417	2.62214	0	0.389493	0.136563	0.0826295	-0.608685	-1.84701	-2.1771	-2.01206
AT2G19460	down	-2.42773	2.9e-05	-3.06311	8.34e-08	0.00553274	3.60272e-08	4.58576	4.32658	5.44961	4.44705	4.11982	2.02053	1.77795	0	-0.194062	0.6468	-0.103865	-0.348873	-1.92071	-2.10234	-2.01153
AT2G35860	down	-3.75795	2.51e-06	-3.93717	2.91e-07	0.013878	0.000911134	4.82768	4.87718	5.81679	4.07459	4.54215	1.42276	1.60879	0	0.0300588	0.60063	-0.457304	-0.173385	-2.0676	-1.95463	-2.01111
AT1G20340	down	-1.72446	0.000440999	-2.74486	3.73e-09	3.70386e-06	0.0380375	11.4257	11.6138	11.661	11.3216	11.1063	9.78121	8.79854	0	0.177127	0.221573	-0.0979849	-0.300716	-1.54829	-2.47347	-2.01088
AT1G32470	down	-2.46155	1.89e-10	-3.48727	1.75e-20	0.000319281	0.00532821	8.10333	8.26085	8.77688	7.7019	7.67372	5.71308	4.84508	0	0.112145	0.479554	-0.285818	-0.305881	-1.70183	-2.31983	-2.01083
AT1G33170	down	-2.8491	2.58e-05	-3.49736	1.81e-07	0.0340252	1.23347e-05	4.17169	4.09562	5.07356	3.56066	3.95692	1.33239	1.27293	0	-0.0533117	0.632066	-0.428237	-0.150518	-1.9899	-2.03157	-2.01073
AT2G29290	down	-3.31125	4.06e-09	-4.11006	2.56e-13	0.000179015	2.56402e-09	4.85105	5.38938	5.32786	4.54417	4.1428	2.24637	1.7853	0	0.381655	0.338042	-0.217572	-0.502125	-1.84663	-2.17351	-2.01007
AT1G05385	down	-1.58154	1.14e-06	-1.22133	5.52e-05	0.000105018	0.0101297	5.24316	4.92355	5.68834	5.11521	5.24555	3.33005	3.80195	0	-0.382989	0.533448	-0.153321	0.00286212	-2.29247	-1.72699	-2.00973
AT3G03820	down	-4.98288	2.1e-05	-5.12445	2.35e-06	0.0021605	8.17996e-07	3.41588	3.761	3.99928	3.42041	2.48282	0.395046	0.523806	0	0.23453	0.396458	0.00308063	-0.634069	-2.05284	-1.96534	-2.00909
AT5G54270	down	-3.12314	2.2e-12	-3.81792	1.02e-18	4.60562e-05	0.0205598	11.5606	12.1061	12.1041	11.1499	10.8821	8.85142	8.20165	0	0.360948	0.35962	-0.27168	-0.448888	-1.79242	-2.22231	-2.00736
AT1G77690	down	-3.45493	0.00316959	-4.94508	0.000396684	0.00546931	0.000676583	2.05863	2.35082	2.4025	1.86205	1.61915	0.452227	0.227052	0	0.341182	0.401519	-0.22954	-0.51316	-1.87573	-2.13866	-2.0072
AT1G22170	down	-4.19562	0.00408462	-3.3383	0.0021747	0.000700591	0.000785951	2.21996	2.1786	2.8074	1.94211	1.95172	0.231338	0.511972	0	-0.0449015	0.63778	-0.301656	-0.291222	-2.15902	-1.85434	-2.00668
AT4G29360	down	-4.2242	0.00630116	-4.7633	0.00156204	2.15128e-06	7.45862e-07	2.45643	2.32858	3.16523	2.37047	1.96146	0.2624	0.2107	0	-0.115573	0.640705	-0.0777074	-0.447424	-1.98328	-2.03001	-2.00664
AT3G01500	down	-3.87549	9.58e-09	-5.17931	2.38e-15	0.0314107	0.000996217	9.50632	10.2459	10.2736	8.84359	8.66216	5.83103	4.99208	0	0.362348	0.375939	-0.324697	-0.41359	-1.80068	-2.21171	-2.00619
AT5G50280	down	-2.3767	4.77e-06	-1.64045	0.000647511	0.000103394	0.000411347	4.39649	4.43614	4.68992	4.07552	4.38438	2.25974	3.02625	0	0.0453667	0.335692	-0.367204	-0.0138543	-2.44453	-1.5676	-2.00606
AT3G59250	down	-2.97724	0.00388818	-3.24614	0.000804664	5.62418e-05	0.0239252	2.65566	2.55312	3.33079	2.5008	2.23792	0.683566	0.445391	0	-0.0983343	0.647461	-0.148512	-0.400615	-1.89125	-2.11967	-2.00546
AT3G21055	down	-1.46283	0.0029834	-2.79694	1.2e-09	0.00301776	0.0346661	9.93069	9.83104	9.97201	10.0481	9.87159	8.2628	6.98065	0	-0.0865118	0.0358782	0.101939	-0.0513053	-1.44813	-2.56133	-2.00473
AT5G56220	down	-3.63985	0.0256279	-2.97867	0.0242475	0.00251905	0.00243363	1.95736	1.67213	2.32645	1.60164	2.22921	0.259835	0.399318	0	-0.35106	0.454281	-0.437818	0.334597	-2.08934	-1.91766	-2.0035
AT2G24060	down	-1.8604	1.29e-06	-1.52683	3.68e-05	0.0127237	0.0371446	5.71856	5.67393	6.23362	5.49106	5.47562	3.7527	4.21629	0	-0.0515598	0.595085	-0.262842	-0.280683	-2.27129	-1.73567	-2.00348
AT5G66005	down	-1.96364	0.00290099	-1.28424	0.0341135	0.0402707	0.0202578	3.37279	3.12466	3.60229	3.45147	3.31275	1.51426	2.21424	0	-0.329464	0.304718	0.104466	-0.0797198	-2.46772	-1.53831	-2.00302
AT4G05040	down	-1.28489	0.00806428	-1.07723	0.0168909	5.40621e-06	0.000122436	3.47696	3.55367	3.55527	3.19925	3.59965	2.36594	2.66751	0	0.160011	0.163345	-0.57927	0.255914	-2.31742	-1.68838	-2.0029
AT1G60390	down	-3.66136	0.0334106	-4.12322	0.012918	0.000133075	7.23813e-05	1.54429	1.30052	2.03296	1.45172	1.39195	0.132952	0.118111	0	-0.343943	0.689495	-0.130609	-0.214943	-1.99131	-2.01225	-2.00178
AT5G65310	down	-2.90697	2.51e-06	-2.36897	3.31e-05	2.64269e-05	3.40153e-07	4.99369	4.37819	5.64079	4.56308	5.39272	1.88874	2.46218	0	-0.437118	0.45955	-0.305809	0.283377	-2.20506	-1.79781	-2.00144
AT2G24350	down	-4.39237	0.00380795	-2.48225	0.0340706	7.94017e-06	0.00388905	1.14931	1.17963	1.40915	1.10765	0.900816	0	0.282111	0	0.0600893	0.515043	-0.0825805	-0.492552	-2.27809	-1.71891	-1.9985
AT4G39330	down	-4.05372	1.87e-06	-4.46228	7.54e-08	0.00863303	0.000590543	6.58838	7.1644	7.47315	5.96158	5.7544	2.98706	2.98191	0	0.319347	0.490525	-0.347504	-0.462368	-1.9966	-1.99946	-1.99803
AT3G55420	down	-3.02283	2.07e-05	-2.41898	0.000121494	0.00244706	0.0133489	3.87802	3.70306	4.6613	3.51652	3.6312	1.23833	1.74741	0	-0.14656	0.65614	-0.302822	-0.206758	-2.21121	-1.78477	-1.99799
AT5G49800	down	-5.65494	0.000191708	-3.75683	0.00141059	9.61086e-07	2.95071e-05	2.02762	1.96256	2.50137	1.46448	2.18207	0	0.282111	0	-0.0688687	0.501469	-0.596092	0.163492	-2.14627	-1.84765	-1.99696
AT5G16720	down	-2.32094	0.00379433	-2.40558	0.000730822	0.0230773	0.0113128	2.45809	2.27917	3.0355	2.11877	2.39894	0.710053	0.824454	0	-0.211288	0.681854	-0.400707	-0.0698598	-2.06427	-1.92917	-1.99672
AT4G34580	down	-4.99769	0.0203383	-5.45954	0.00877114	5.10178e-05	5.10178e-05	1.83147	1.34493	2.15518	1.58001	2.24575	0	0	0	-0.530393	0.352896	-0.274131	0.451628	-1.99657	-1.99657	-1.99657
AT5G10690	down	-2.50184	3.62e-06	-1.91092	0.000124102	0.00154844	1.80539e-07	4.34421	4.42694	4.84244	4.04657	4.06088	2.10634	2.75116	0	0.0862257	0.519269	-0.310205	-0.29529	-2.33233	-1.6603	-1.99631
AT5G18020	down	-4.03039	9.18e-05	-7.40526	1.95e-06	0.000491415	3.23512e-07	3.31837	3.74137	3.9028	3.05944	2.56987	0.819343	0.0838966	0	0.294531	0.406929	-0.180292	-0.521168	-1.74004	-2.25212	-1.99608
AT1G68060	down	-2.21018	4.92e-05	-1.64947	0.000940914	0.0169115	0.000858801	4.06048	3.97305	4.53202	3.6882	4.04867	1.91985	2.56034	0	-0.0958564	0.516943	-0.408137	-0.0129492	-2.34676	-1.6446	-1.99568
AT2G28000	down	-2.6378	3.79e-06	-1.60549	0.00570604	0.0106366	0.0194157	8.48894	8.2367	8.88332	8.43393	8.40181	5.49494	6.72616	0	-0.211548	0.33076	-0.0461382	-0.0730733	-2.51103	-1.47842	-1.99473
AT5G61270	down	-1.87805	0.00069728	-2.60613	2.19e-06	0.0165513	4.69832e-07	3.56485	3.4612	4.24713	3.21999	3.33107	1.72864	1.40525	0	-0.103435	0.680903	-0.344164	-0.233304	-1.83251	-2.15524	-1.99387
AT4G34090	down	-2.62009	1.21e-13	-2.35542	1.14e-13	6.33982e-06	0.0269005	5.0171	5.17515	5.7002	4.55581	4.63723	2.64187	2.91192	0	0.140652	0.607893	-0.410498	-0.338047	-2.11371	-1.8734	-1.99356
AT4G11320	down	-7.21291	1.79e-05	-7.06935	2.56e-06	6.70797e-05	6.92616e-05	4.00823	3.8625	3.67079	3.19145	5.30817	0.236996	0.296754	0	-0.0776019	-0.179697	-0.434958	0.692257	-2.00829	-1.97647	-1.99238
AT1G29430	down	-3.79884	3.87e-06	-5.3201	8.93e-09	0.0314573	1.46999e-07	4.05179	4.29981	5.10232	3.49926	3.30577	0.740349	0.627304	0	0.146669	0.621232	-0.326742	-0.44116	-1.95823	-2.02508	-1.99166
AT1G19150	down	-3.83511	3.27e-10	-4.05158	6.84e-12	0.0380689	0.000765783	5.6539	6.37715	6.23941	5.26531	4.73373	2.21414	2.55107	0	0.440306	0.356454	-0.236567	-0.560193	-2.09409	-1.88897	-1.99153
AT3G06770	down	-4.09569	1.86e-05	-5.36916	1.45e-06	0.000264009	1.42377e-07	3.46375	3.3314	4.29116	3.70404	2.52841	0.553823	0.273419	0	-0.0864018	0.540152	0.156869	-0.610618	-1.89968	-2.08274	-1.99121
AT4G02790	down	-2.7556	1.22e-09	-1.94463	5.58e-07	1.33467e-07	0.0253662	4.70922	4.50499	5.45171	4.47023	4.40994	1.99424	2.71489	0	-0.172687	0.627822	-0.202079	-0.253056	-2.29568	-1.68634	-1.99101
AT3G23450	down	-2.74775	0.000127955	-3.7243	1.2e-07	5.32007e-05	0.0244161	4.93206	5.54821	4.45114	5.08781	4.6411	2.91992	2.09599	0	0.506058	-0.394996	0.127918	-0.238979	-1.65264	-2.32936	-1.991
AT4G07400	down	-2.13733	0.00456564	-2.50541	0.000389086	0.00858606	0.00492538	2.21318	2.2516	2.67181	1.84037	2.08896	0.835801	0.711842	0	0.0531331	0.634348	-0.515661	-0.171819	-1.90513	-2.07658	-1.99085
AT5G41050	down	-2.64856	2.62e-07	-3.49702	8.08e-12	0.00910725	0.0316067	4.64273	5.23055	4.89151	4.31021	4.13865	2.63678	1.98726	0	0.502025	0.212471	-0.283987	-0.430509	-1.71318	-2.2679	-1.99054
AT4G00165	down	-2.73982	1.84e-14	-2.14436	2.81e-10	5.80133e-05	0.028981	6.40296	6.73235	6.82132	6.17567	5.88249	3.9472	4.6049	0	0.308189	0.391434	-0.212661	-0.486961	-2.29768	-1.68231	-1.99
AT5G57830	down	-1.98336	0.0240016	-2.81479	0.00214507	0.00506761	5.18617e-08	1.82873	1.67148	2.31107	1.68503	1.64733	0.578064	0.400222	0	-0.233568	0.716464	-0.213449	-0.269446	-1.85772	-2.12188	-1.9898
AT3G05900	down	-1.86867	0.000278192	-1.84348	0.000164951	1.30322e-05	0.000874726	5.08638	4.50388	5.6614	5.50087	4.67937	2.66262	2.79418	0	-0.491437	0.485127	0.349694	-0.343385	-2.04486	-1.93387	-1.98937
AT4G01040	down	-1.15309	0.00198373	-1.08118	0.00197531	0.0178278	0.0108561	4.19357	4.24851	4.50194	4.05172	3.9721	3.05379	3.2799	0	0.106444	0.597463	-0.274829	-0.429078	-2.20828	-1.7702	-1.98924
AT4G32800	down	-2.15498	0.00653146	-2.80137	0.00030044	0.0125691	6.31071e-08	4.14287	3.03162	4.37444	4.65524	4.51015	1.16155	1.05126	0	-0.727856	0.151681	0.335605	0.240571	-1.95275	-2.02498	-1.98886
AT5G64330	down	-4.21927	9.54e-09	-2.53342	6.12e-06	0.000135514	0.00112287	4.32106	4.14951	5.05334	3.78039	4.30101	0.903498	2.03354	0	-0.119596	0.510488	-0.376914	-0.013977	-2.38246	-1.59468	-1.98857
AT5G57170	down	-1.49408	0.00302588	-1.16575	0.0153568	0.0106546	0.0404912	4.49926	4.20176	4.84136	4.75538	4.19855	2.69438	3.13954	0	-0.373881	0.429925	0.321876	-0.37792	-2.26828	-1.70883	-1.98855
AT4G24930	down	-1.99661	1.36e-07	-2.63033	9.9e-13	1.95389e-06	0.0122062	5.57175	5.89453	5.97884	5.34072	5.07292	3.87256	3.35838	0	0.328099	0.413793	-0.234836	-0.507056	-1.7272	-2.24985	-1.98852
AT3G63200	down	-3.85429	0.00288256	-3.81381	0.00118098	4.32958e-05	5.68307e-05	2.83643	2.62153	3.66776	2.6893	2.36711	0.496186	0.562636	0	-0.185208	0.716478	-0.126795	-0.404475	-2.01692	-1.95965	-1.98829
AT5G18050	down	-4.4078	0.00695947	-5.77643	0.000751867	0.000306199	0.000116433	2.05859	2.213	2.53724	1.43624	2.04788	0.2624	0.0838966	0	0.162818	0.504725	-0.656247	-0.0112954	-1.89402	-2.08225	-1.98813
AT2G44040	down	-3.32537	0.00309048	-2.42015	0.0161976	0.00237198	0.020099	3.09117	2.83755	3.80063	2.66463	3.06187	0.71727	1.17541	0	-0.234989	0.657344	-0.395208	-0.0271477	-2.19951	-1.77503	-1.98727
AT1G75710	down	-2.6553	0.000207382	-3.01258	1.15e-05	0.00221338	0.00140409	3.59168	3.56688	4.24889	3.69662	2.85434	1.35324	1.20133	0	-0.0212901	0.564219	0.0900897	-0.633018	-1.92173	-2.05214	-1.98693
AT5G16540	down	-1.29232	5.93e-07	-1.73051	2.99e-12	2.96246e-06	0.0239843	4.8588	4.90512	5.28159	4.45319	4.79531	3.55454	3.2434	0	0.0630325	0.575401	-0.55203	-0.0864044	-1.77506	-2.19851	-1.98678
AT1G03130	down	-2.08108	1.56e-05	-2.26016	1.5e-06	0.000221934	0.0230295	8.62745	9.00242	9.02152	8.40126	8.08458	6.7903	6.75657	0	0.401805	0.422271	-0.242367	-0.581708	-1.9686	-2.00474	-1.98667
AT2G36570	down	-3.97338	0.002517	-2.67596	0.0086344	3.87846e-05	3.27706e-05	2.78147	2.49288	3.50958	2.66765	2.45579	0.366739	0.887333	0	-0.266108	0.67138	-0.104958	-0.300314	-2.2266	-1.74657	-1.98658
AT3G51080	down	-3.39009	0.0050554	-4.03613	0.000795078	0.00130923	0.00192071	2.17431	2.48956	2.58215	1.99072	1.6348	0.468334	0.272515	0	0.347137	0.449096	-0.202154	-0.594079	-1.87853	-2.09416	-1.98635
AT5G46690	down	-2.92345	0.0141694	-3.79046	0.0017922	0.00298145	4.06912e-06	2.86262	2.25109	3.64182	2.57105	2.98652	0.524493	0.400222	0	-0.505793	0.644472	-0.241153	0.102475	-1.93385	-2.03663	-1.98524
AT5G09870	down	-2.05731	4.55e-05	-2.31594	2.25e-06	1.1073e-06	0.0216161	6.12883	6.25135	6.79678	5.73524	5.73195	4.17319	4.00049	0	0.119115	0.649373	-0.382642	-0.385847	-1.90126	-2.06916	-1.98521
AT5G18060	down	-3.0028	0.00641532	-2.91669	0.00358972	9.62828e-05	0.0136521	2.31694	2.49048	2.79212	1.85004	2.13513	0.700149	0.681794	0	0.211686	0.579646	-0.569547	-0.221785	-1.97224	-1.99464	-1.98344
AT3G63140	down	-1.96712	2.68e-05	-2.00201	1.14e-05	0.0213672	0.026791	6.19098	6.49393	6.62373	5.76824	5.87803	4.37982	4.55473	0	0.348555	0.4979	-0.486389	-0.360065	-2.08383	-1.88258	-1.9832
AT4G29610	down	-3.6543	0.00689732	-6.54926	3.72e-05	0.000331166	2.9436e-06	2.15446	2.22174	2.78974	1.92944	1.67694	0.361081	0	0	0.0675726	0.638093	-0.226022	-0.479644	-1.80134	-2.16402	-1.98268
AT1G66180	down	-1.69503	0.000364688	-2.73047	6.56e-09	0.0278622	0.00702023	5.2967	4.83608	5.7921	5.87187	4.68675	2.96496	2.3314	0	-0.3447	0.370731	0.43042	-0.456452	-1.74494	-2.21905	-1.98199
AT5G58930	down	-2.17219	3.25e-07	-2.20523	3.95e-08	2.31595e-06	0.000749584	4.53394	4.78794	5.04175	4.16319	4.14286	2.72026	2.78885	0	0.282904	0.565599	-0.412932	-0.435571	-2.02003	-1.94364	-1.98184
AT5G17670	down	-1.25222	0.000345382	-1.48828	9.16e-06	0.00672299	0.000163412	5.526	5.50433	6.01929	5.3327	5.24767	4.19939	4.12621	0	-0.0315051	0.717123	-0.281003	-0.404615	-1.92855	-2.03493	-1.98174
AT2G05070	down	-3.00731	2.12e-08	-3.80529	2.2e-13	1.61372e-07	0.0220281	10.5673	11.2229	10.9625	10.3261	9.75778	8.09338	7.30815	0	0.453033	0.273116	-0.16671	-0.559439	-1.70963	-2.25226	-1.98094
AT3G56650	down	-1.36513	5.05e-07	-2.2823	8.09e-17	1.62506e-05	0.0294663	4.88605	5.05306	5.16747	4.76124	4.56243	3.65615	2.91455	0	0.20666	0.348222	-0.154438	-0.400444	-1.52187	-2.4395	-1.98068
AT3G50100	down	-2.29854	0.0152983	-2.58911	0.0029038	0.00581181	0.0174512	1.73237	1.83858	2.08643	1.37305	1.63142	0.581675	0.499566	0	0.176486	0.588328	-0.597068	-0.167746	-1.91208	-2.04852	-1.9803
AT3G13980	down	-3.30357	0.00491826	-1.82627	0.0239605	0.000118091	0.000129395	2.42477	1.9949	2.76393	2.22012	2.72012	0.36429	0.968619	0	-0.483957	0.381843	-0.230403	0.332517	-2.31974	-1.63937	-1.97956
AT2G38970	down	-2.82676	0.00279049	-2.59863	0.00157764	0.0380751	0.0467898	2.32941	2.5369	2.78552	2.20365	1.79158	0.587823	0.707441	0	0.244112	0.536628	-0.147962	-0.632778	-2.04905	-1.90831	-1.97868
AT5G44680	down	-4.01585	6.9e-08	-3.77049	9.1e-08	0.00462143	0.00612397	5.39862	5.46918	6.54138	5.25099	4.33292	1.65882	2.01874	0	0.0392106	0.635035	-0.0820373	-0.592209	-2.07821	-1.87821	-1.97821
AT5G39860	down	-3.37667	0.00695444	-4.36699	0.000494731	0.0426927	4.36247e-05	3.00265	3.37683	3.16969	2.09544	3.36863	0.650301	0.617677	0	0.312431	0.139474	-0.75749	0.305585	-1.96414	-1.99138	-1.97776
AT1G55490	down	-3.30296	4.89e-09	-1.99567	0.000345629	0.000768366	0.0169089	6.92482	6.78172	7.56933	6.59705	6.75117	3.45144	4.85043	0	-0.101989	0.459365	-0.233613	-0.123762	-2.47559	-1.47849	-1.97704
AT5G55730	down	-3.93004	0.000248924	-4.64622	1.09e-05	1.9581e-05	1.64098e-05	4.7005	4.54968	5.90149	3.75354	4.5973	1.41217	1.03583	0	-0.0857579	0.682884	-0.538447	-0.0586789	-1.86976	-2.08374	-1.97675
AT4G24350	down	-2.58694	6.37e-05	-2.75223	9.87e-06	0.000881272	1.78368e-08	5.44319	4.71798	5.6923	4.86195	6.5005	2.23715	2.2981	0	-0.451329	0.155038	-0.361728	0.658019	-1.99527	-1.95734	-1.97631
AT2G40690	down	-2.01298	0.00168467	-2.04769	0.000346422	0.000134298	0.00616924	2.34885	2.69094	2.51142	2.02385	2.16919	1.16029	1.18565	0	0.574792	0.273158	-0.54608	-0.30187	-1.99705	-1.95444	-1.97575
AT3G59420	down	-3.33681	0.00234013	-1.78787	0.00878202	1.60878e-07	0.0490851	2.04019	2.10767	2.42914	1.85038	1.77356	0.392143	0.908465	0	0.0958807	0.55265	-0.269693	-0.378838	-2.34166	-1.60803	-1.97485
AT3G01810	down	-2.94968	1.19e-06	-2.59962	1.4e-06	2.66767e-06	0.00290263	3.68842	3.94758	4.28309	3.07346	3.44957	1.45376	1.74596	0	0.244976	0.562122	-0.581314	-0.225785	-2.11236	-1.83616	-1.97426
AT3G08940	down	-2.09033	1.46e-06	-2.91493	2.84e-12	1.29831e-05	0.0437293	9.88309	10.2634	10.3073	9.64195	9.31967	8.05969	7.25988	0	0.337689	0.376663	-0.214099	-0.500253	-1.61898	-2.32913	-1.97405
AT3G61550	down	-2.27056	2.89e-05	-2.07184	4.29e-05	0.0149762	0.0210906	4.27184	4.19686	4.92781	4.37508	3.5876	2.00637	2.25976	0	-0.0691873	0.60533	0.0952695	-0.631412	-2.09056	-1.85673	-1.97364
AT4G15560	down	-2.21164	5.86e-10	-2.21332	2.15e-10	5.26162e-08	0.00971218	7.49088	7.92554	7.87323	7.14926	7.01548	5.61155	5.74562	0	0.473036	0.41611	-0.371778	-0.517367	-2.04524	-1.89934	-1.97229
AT2G26870	down	-1.98389	0.00107279	-1.80501	0.000571898	0.0166022	0.00572178	2.52232	2.70634	2.85761	2.30321	2.22213	1.19114	1.41885	0	0.298116	0.543168	-0.35497	-0.486314	-2.15654	-1.78765	-1.9721
ATCG01100	down	-1.33505	0.00473003	-2.40246	1.16e-07	6.27539e-06	0.0216438	5.16759	5.40541	5.08138	5.19215	4.99142	4.02115	3.06032	0	0.288177	-0.104465	0.0297643	-0.213476	-1.38923	-2.55353	-1.97138
AT1G57820	down	-2.20241	0.0326808	-3.94813	0.00073776	3.85723e-05	4.19708e-05	2.58486	2.32267	3.26193	2.44046	2.31438	0.939934	0.344277	0	-0.265963	0.686815	-0.146483	-0.274369	-1.6686	-2.27282	-1.97071
AT5G64040	down	-1.54194	0.00152359	-2.75085	1.82e-09	0.00615194	0.0420115	9.70216	9.81073	10.0615	9.5904	9.34599	8.17018	7.02001	0	0.101527	0.336043	-0.104505	-0.333065	-1.43259	-2.50815	-1.97037
AT1G05850	down	-2.49688	2.84e-06	-3.01588	5.67e-09	3.86945e-05	0.0271506	8.27181	8.54943	9.05423	7.76908	7.71449	5.978	5.48123	0	0.21512	0.606273	-0.389547	-0.431845	-1.7774	-2.16233	-1.96987
AT5G10150	down	-3.02933	7.12e-06	-6.02729	1.29e-08	0.0050158	1.22897e-05	3.50233	4.0459	3.85563	3.21899	2.88879	1.41539	0.296754	0	0.404414	0.262854	-0.210798	-0.456471	-1.55267	-2.38493	-1.9688
AT2G28450	down	-2.23136	0.000113566	-1.4773	0.00331339	0.0214695	0.00477375	3.47921	3.38636	3.93812	3.29975	3.29259	1.47584	2.22728	0	-0.112304	0.555101	-0.217065	-0.225732	-2.42324	-1.51431	-1.96878
AT1G52230	down	-2.09001	5e-06	-3.33867	2.21e-14	0.000378936	0.0274107	10.3185	10.6362	10.7377	10.1158	9.78412	8.42672	7.20687	0	0.250005	0.329852	-0.15943	-0.420428	-1.48845	-2.44826	-1.96836
AT5G25490	down	-4.75901	0.00608324	-5.22087	0.00190966	0.000146497	8.02115e-05	1.83598	1.87069	2.47291	1.4263	1.57404	0.132952	0.0838966	0	0.039536	0.725542	-0.466688	-0.29839	-1.93998	-1.99586	-1.96792
AT3G01680	down	-3.21231	1.41e-05	-3.01403	1e-05	0.0238631	0.0267178	3.77416	4.01757	4.56395	3.12025	3.39487	1.17975	1.4803	0	0.195885	0.635582	-0.526236	-0.305231	-2.08785	-1.84598	-1.96691
ATCG00040	down	-1.40738	0.00746554	-1.41976	0.00556702	3.39437e-05	2.14108e-05	6.66668	6.7053	6.14921	6.91015	6.90207	5.25434	5.39166	0	0.0565221	-0.757404	0.356355	0.344527	-2.06721	-1.86621	-1.96671
AT3G54930	down	-1.88469	0.0289848	-1.81953	0.0133958	0.00258521	0.000124999	1.8066	1.76899	2.22518	1.66211	1.57014	0.682414	0.761808	0	-0.0682022	0.759014	-0.262023	-0.428789	-2.03852	-1.89456	-1.96654
AT1G64390	down	-3.73895	2.09e-05	-5.09536	1.09e-08	8.09309e-06	8.94776e-07	5.19129	5.2605	6.29849	4.08125	5.12491	2.02513	1.23427	0	0.038201	0.611143	-0.612708	-0.0366361	-1.74763	-2.18417	-1.9659
AT1G52245	down	-4.21642	0.0244936	-4.67828	0.00965627	0.000687992	0.000496282	1.31794	1.42278	1.72899	1.05718	1.06282	0.129448	0.118111	0	0.172566	0.6766	-0.429223	-0.419943	-1.95631	-1.97497	-1.96564
AT4G18670	down	-6.04083	5.66e-05	-4.59971	2.56e-05	4.25707e-06	1.53918e-05	3.85713	3.67294	5.18355	3.2018	3.37022	0.262695	0.661559	0	-0.106617	0.767789	-0.379332	-0.28184	-2.0806	-1.84972	-1.96516
AT5G58260	down	-1.97985	1.98e-05	-2.87067	3.19e-10	0.0455449	0.00205108	5.08987	5.37409	5.70552	4.69649	4.5834	3.21701	2.71012	0	0.262615	0.568845	-0.36348	-0.467981	-1.73051	-2.19886	-1.96468
AT5G22640	down	-2.97968	3.45e-09	-1.53633	0.00178879	0.00893336	0.0423073	6.13728	6.06082	6.15619	6.23301	6.0991	3.06586	4.59063	0	-0.0650492	0.0160872	0.0814488	-0.0324867	-2.61328	-1.31595	-1.96461
AT2G35370	down	-1.6528	1.87e-07	-2.55459	4.6e-17	6.23021e-08	0.0360682	8.70992	8.75388	9.34005	8.3512	8.39456	7.01394	6.13978	0	0.0404814	0.58025	-0.33033	-0.290401	-1.56174	-2.36671	-1.96422
AT5G53500	down	-2.07641	0.000241412	-1.61738	0.00157872	5.32186e-06	1.10032e-05	3.65144	3.60993	4.13647	3.711	3.14836	1.79364	2.2497	0	-0.049981	0.583971	0.0717124	-0.605702	-2.23676	-1.68767	-1.96222
AT3G29030	down	-4.04528	1.89e-05	-3.15774	0.000452982	0.00158541	0.00265474	5.15813	5.0911	6.36644	4.69378	4.4812	1.46847	2.26405	0	-0.0399363	0.719892	-0.276653	-0.403302	-2.19824	-1.72425	-1.96124
AT4G12830	down	-3.2643	9.87e-08	-3.54791	9.06e-10	0.0128824	5.32107e-05	3.73283	4.1034	4.48359	3.35657	2.98774	1.23555	1.26927	0	0.292945	0.593481	-0.297429	-0.588996	-1.97411	-1.94746	-1.96078
AT1G34010	down	-2.798	1.09e-05	-2.08661	4.33e-05	0.00326594	0.03566	3.03925	3.21805	3.51853	2.96295	2.45747	1.06099	1.50473	0	0.199537	0.53487	-0.0851508	-0.649255	-2.20772	-1.7125	-1.96011
AT1G75800	down	-2.27573	1.17e-09	-1.55151	3.35e-06	0.00713916	0.0423421	5.18005	4.86695	5.9549	4.89241	5.00595	2.59754	3.36491	0	-0.279075	0.690636	-0.256384	-0.155178	-2.30185	-1.61787	-1.95986
AT1G36060	down	-1.91832	0.0242533	-4.8789	0.000216064	0.000810146	6.54616e-08	2.68357	2.47704	2.68524	3.2925	2.27948	1.07626	0.202008	0	-0.197944	0.00160912	0.583621	-0.387286	-1.54048	-2.37839	-1.95943
AT3G47470	down	-2.59515	7.22e-13	-2.89392	2.28e-16	1.16811e-07	0.0392059	11.4922	11.9802	12.0983	11.0729	10.8175	9.27213	9.01437	0	0.406942	0.505427	-0.349692	-0.562677	-1.85153	-2.06649	-1.95901
AT3G25500	down	-2.09838	9.59e-06	-3.68403	1.19e-13	0.00265984	0.0384704	4.82571	5.08981	5.17199	4.77917	4.26187	2.9914	1.59227	0	0.20407	0.267568	-0.0359609	-0.435677	-1.41737	-2.49847	-1.95792
AT3G43960	down	-4.83904	0.000624964	-3.98111	0.000134934	5.79715e-06	0.000780544	2.47007	2.83104	3.00673	2.33811	1.70442	0.2624	0.447283	0	0.334077	0.49668	-0.122135	-0.708623	-2.04323	-1.87212	-1.95768
AT5G40610	down	-2.54247	0.000540582	-1.76539	0.00687121	9.85551e-07	0.00994484	3.35294	3.19605	3.93405	2.89107	3.3906	1.28683	1.855	0	-0.172338	0.638318	-0.507346	0.0413669	-2.26954	-1.64543	-1.95748
AT5G07580	down	-2.59348	1.51e-06	-3.15908	1.89e-09	0.000135604	0.0101309	5.69298	5.72059	6.72221	5.28046	5.04865	3.18291	2.77197	0	0.0198926	0.741433	-0.297166	-0.464159	-1.80819	-2.10422	-1.9562
AT3G16950	down	-1.5808	0.0157695	-1.27273	0.0426791	0.00030971	0.0236101	4.205	3.84665	4.85619	4.05707	4.0601	2.34252	2.70873	0	-0.417381	0.758458	-0.172307	-0.16877	-2.1693	-1.74275	-1.95603
AT4G36180	down	-3.50186	0.0194433	-2.25438	0.0359636	1.01701e-05	9.81376e-05	2.09897	1.76696	2.67771	1.74333	2.20787	0.2624	0.617677	0	-0.391453	0.682374	-0.419322	0.1284	-2.16541	-1.74652	-1.95597
AT2G42170	down	-4.12649	0.015735	-2.71765	0.0326618	4.55944e-06	0.000264873	2.13781	1.56608	2.83055	2.04883	2.10579	0.129743	0.368166	0	-0.591738	0.716976	-0.0920993	-0.0331391	-2.07833	-1.83157	-1.95495
AT5G52970	down	-1.99873	1.4e-06	-1.85833	1.77e-06	0.000766897	0.0118688	4.73121	4.76209	5.41964	4.29904	4.44406	2.81191	3.04512	0	0.0334813	0.746399	-0.468556	-0.311324	-2.08091	-1.82806	-1.95448
AT4G21445	down	-2.90878	1.91e-05	-3.9831	6.92e-09	0.0271184	0.0264281	4.13136	4.82575	4.49574	3.80613	3.39782	1.96403	1.2023	0	0.532398	0.279377	-0.249358	-0.562417	-1.66173	-2.24575	-1.95374
AT1G31710	down	-5.65899	0.00064017	-6.12085	0.000151096	8.79532e-05	8.79532e-05	1.99402	1.80317	2.82685	1.58737	1.7587	0	0	0	-0.18696	0.815852	-0.398363	-0.230528	-1.95338	-1.95338	-1.95338
AT2G34560	down	-2.74882	2.39e-08	-1.88536	3.91e-05	2.18158e-07	0.00631371	5.20654	5.0857	5.94446	4.72325	5.07277	2.5466	3.41354	0	-0.106011	0.647362	-0.42399	-0.117361	-2.33353	-1.57298	-1.95325
AT5G46580	down	-2.362	1.76e-08	-1.34145	0.000744469	0.00109858	0.0268522	5.51268	5.41582	5.96734	5.30162	5.36593	3.04979	4.14336	0	-0.0987176	0.463417	-0.215121	-0.149578	-2.51032	-1.39569	-1.95301
AT4G34620	down	-1.32327	7.76e-05	-2.61326	1.16e-16	0.00750474	0.0166581	10.2063	10.1987	10.6315	10.103	9.89209	8.78209	7.6182	0	-0.00737987	0.413808	-0.100589	-0.305839	-1.38618	-2.51898	-1.95258
AT1G50460	down	-2.56592	1.68e-06	-2.45553	1.37e-06	0.00471345	0.00716866	4.66786	4.87879	5.4088	4.35968	4.02418	2.44129	2.59215	0	0.191437	0.672466	-0.279706	-0.584197	-2.02081	-1.88389	-1.95235
AT1G10370	down	-1.67137	0.0245798	-2.32509	0.000940914	0.0292734	0.00113973	6.96776	7.25899	7.23703	6.32838	7.04663	5.52098	5.08108	0	0.341135	0.31541	-0.748932	0.0923869	-1.69466	-2.20993	-1.9523
AT3G01440	down	-3.87016	5.73e-10	-3.35823	4.11e-10	0.00240142	0.0426613	4.03414	4.57728	4.73538	3.60165	3.22225	1.22765	1.55715	0	0.401278	0.518081	-0.319529	-0.59983	-2.07345	-1.83002	-1.95174
AT1G52190	down	-4.24421	3.66e-07	-7.57966	2.02e-12	0.0312382	5.64606e-07	5.24694	5.70643	6.66615	4.38783	4.22733	1.43246	0.375871	0	0.206503	0.637812	-0.386093	-0.458221	-1.71427	-2.18911	-1.95169
AT3G19480	down	-1.53841	0.000188246	-2.22897	3.45e-08	1.10769e-06	0.013188	4.10031	4.37332	4.45665	3.8571	3.71415	2.85629	2.31053	0	0.351163	0.458343	-0.312818	-0.496688	-1.6001	-2.30208	-1.95109
AT3G23810	down	-2.78363	0.00107126	-2.07815	0.0151061	9.91906e-06	0.0231417	7.83492	7.83904	8.45874	7.10686	7.93504	5.19203	5.9756	0	0.00357038	0.540486	-0.630797	0.0867413	-2.28983	-1.61093	-1.95038
AT5G06870	down	-1.77577	0.00834937	-3.35905	1.47e-07	0.00291433	0.0421715	6.02708	6.22549	5.79616	5.73516	6.35153	4.3677	2.85025	0	0.159956	-0.186173	-0.235357	0.261573	-1.33784	-2.56124	-1.94954
AT4G13710	down	-4.2047	0.0138351	-3.11544	0.0196601	8.63947e-06	0.000508879	1.99381	1.62369	2.52614	1.52315	2.30224	0.132952	0.339661	0	-0.410529	0.590464	-0.522047	0.342113	-2.06406	-1.83477	-1.94941
AT5G49100	down	-1.42828	0.011735	-3.12772	5.04e-08	0.0206771	0.0183444	4.45233	4.27179	5.00491	4.29346	4.23916	2.82697	1.50197	0	-0.15382	0.470798	-0.135355	-0.181624	-1.38481	-2.51371	-1.94926
AT2G02740	down	-1.68499	0.0031407	-1.20124	0.0295356	0.0213869	0.0111895	4.53341	4.31461	5.07747	4.36204	4.37953	2.65168	3.29126	0	-0.272995	0.678809	-0.213818	-0.191997	-2.34778	-1.5498	-1.94879
AT2G22330	down	-1.49777	0.034777	-1.9725	0.00336185	3.211e-06	2.68152e-05	7.33399	6.76147	7.38952	6.95039	8.23458	5.17366	4.84198	0	-0.47936	0.0464971	-0.321182	0.754045	-1.80879	-2.0865	-1.94764
AT1G72500	down	-2.10117	3e-05	-2.53231	1.91e-07	6.37768e-06	1.12894e-05	3.57549	3.88963	3.99086	2.93867	3.48281	2.00006	1.78308	0	0.363152	0.480172	-0.736183	-0.10714	-1.82124	-2.07208	-1.94666
AT1G70210	down	-2.21355	0.0178376	-2.79351	0.00203013	0.00533974	0.0150694	2.79065	2.62012	3.59124	2.34717	2.60407	0.974701	0.764184	0	-0.172777	0.811136	-0.449322	-0.189037	-1.83986	-2.05315	-1.9465
AT3G03630	down	-1.88116	0.01763	-1.54296	0.0281926	0.0391045	0.039962	2.69887	2.42782	3.36819	2.53047	2.46898	0.965205	1.23636	0	-0.33013	0.815222	-0.205097	-0.279995	-2.11155	-1.7813	-1.94643
AT4G18370	down	-1.71868	4.6e-06	-2.23795	7.92e-10	0.00868267	0.0415684	5.13034	5.25506	5.79059	4.62231	4.85338	3.47078	3.08511	0	0.13104	0.693675	-0.533737	-0.290978	-1.74356	-2.14875	-1.94615
AT1G13650	down	-4.69777	2.9e-09	-3.03409	2.85e-05	0.000938293	0.000903671	5.36572	5.77694	6.09711	4.89838	4.69047	1.48873	2.97502	0	0.255209	0.453913	-0.290044	-0.419077	-2.40614	-1.48371	-1.94493
AT1G75500	down	-1.9821	7.37e-05	-2.57483	1.08e-07	2.36745e-06	0.0422761	6.39995	6.24987	7.36675	6.19368	5.78949	4.22169	3.64039	0	-0.118224	0.761606	-0.16249	-0.480892	-1.71593	-2.17385	-1.94489
AT2G32990	down	-5.49555	3.55e-05	-3.79104	0.000629638	1.22646e-05	0.00714701	3.92668	3.84875	5.00378	2.95104	3.90316	0.468811	1.22139	0	-0.0491861	0.679783	-0.615752	-0.0148443	-2.18235	-1.70737	-1.94486
AT3G18485	down	-2.50718	0.0147622	-1.63271	0.0488224	0.0163105	0.0308447	2.01562	2.0502	1.61411	2.33163	2.06653	0.552966	1.03166	0	0.0549643	-0.638206	0.502309	0.0809323	-2.32493	-1.56403	-1.94448
AT4G03280	down	-1.37539	1.46e-06	-1.56696	1.71e-08	0.00417747	0.0180669	9.64816	9.82903	10.1099	9.36044	9.29323	8.33217	8.29961	0	0.263744	0.673342	-0.419536	-0.51755	-1.91895	-1.96642	-1.94269
AT4G24510	down	-2.3167	0.00324498	-1.65231	0.0294505	1.26267e-05	0.00146228	4.21961	4.10765	4.90907	4.01233	3.8494	2.03315	2.69376	0	-0.117158	0.721438	-0.216897	-0.387384	-2.28787	-1.59662	-1.94225
AT1G53800	down	-2.32583	4.55e-05	-1.3403	0.0070082	2.10292e-08	2.51754e-05	3.88975	3.6225	4.47611	3.84897	3.61143	1.6173	2.48529	0	-0.282296	0.619362	-0.0430812	-0.293985	-2.40035	-1.4835	-1.94193
AT5G63180	down	-4.79848	1.83e-05	-5.65587	6.23e-07	0.000105845	6.9935e-06	3.85479	4.40667	4.74109	2.6885	3.5829	0.819161	0.606718	0	0.341078	0.547759	-0.720801	-0.168035	-1.87611	-2.0074	-1.94175
AT3G29185	down	-2.03673	1.35e-07	-1.51396	2.26e-05	0.0015049	0.0401603	5.00046	4.90231	5.69636	4.85324	4.54993	2.88035	3.44169	0	-0.103579	0.734394	-0.155361	-0.475454	-2.23738	-1.64499	-1.94119
AT1G02150	down	-1.96216	2.84e-05	-1.19377	0.00886297	0.000320532	0.00959725	5.16904	5.02068	5.66039	4.98909	5.00602	3.11624	3.97062	0	-0.177105	0.586514	-0.214811	-0.194598	-2.4504	-1.43054	-1.94047
AT1G61520	down	-2.17188	1.05e-10	-2.16957	4.62e-11	1.3305e-06	0.0378397	11.3831	11.7714	11.927	10.9862	10.8478	9.47931	9.58906	0	0.407263	0.570454	-0.416259	-0.561457	-1.99667	-1.88157	-1.93912
AT2G02980	down	-2.57336	0.00741752	-2.29492	0.00251373	0.0141601	0.00939179	1.76228	1.87701	2.16588	1.71971	1.28651	0.463153	0.566813	0	0.178322	0.627273	-0.0661551	-0.73944	-2.0191	-1.85799	-1.93854
AT4G39710	down	-2.40367	1.65e-10	-3.73175	2.36e-21	3.13508e-07	0.00103179	5.41411	5.74304	6.14963	4.82556	4.93819	3.33781	2.24931	0	0.243256	0.543943	-0.435248	-0.351951	-1.53549	-2.34046	-1.93797
AT5G66190	down	-1.45004	2.81e-06	-1.3763	6.14e-06	0.024545	0.0400709	8.7281	8.97271	9.07903	8.48129	8.37938	7.37389	7.62908	0	0.386421	0.55438	-0.389904	-0.550897	-2.13933	-1.7362	-1.93776
AT1G25425	down	-2.24672	0.00266188	-2.25174	0.00118902	0.0268972	0.0109572	3.17569	3.1566	3.94551	2.97527	2.6254	1.22916	1.35364	0	-0.0196285	0.79136	-0.206036	-0.565696	-2.001	-1.87304	-1.93702
AT5G12940	down	-3.25093	0.015706	-3.58261	0.00515138	6.32888e-06	1.13257e-05	2.68642	2.36081	3.54366	2.75556	2.08566	0.598077	0.517429	0	-0.296182	0.779764	0.0628886	-0.54647	-1.89961	-1.97297	-1.93629
AT3G12710	down	-5.52005	0.00344485	-6.9437	0.000125699	3.59949e-05	2.60661e-05	2.53087	2.45334	3.52352	2.39576	1.75087	0.129448	0	0	-0.060866	0.779274	-0.10607	-0.612337	-1.88523	-1.98685	-1.93604
AT5G43750	down	-2.0977	6.57e-06	-2.48829	3.56e-08	0.0225945	0.0490332	5.50308	5.82636	6.17169	4.95004	5.06422	3.61615	3.38716	0	0.312598	0.646513	-0.534759	-0.424352	-1.82457	-2.04599	-1.93528
AT3G17170	down	-3.34753	1.06e-08	-1.81345	0.000690836	1.28576e-06	0.0257669	5.27064	5.07473	6.10199	4.98413	4.92172	1.98681	3.33728	0	-0.14523	0.616283	-0.212397	-0.258657	-2.43433	-1.43322	-1.93377
AT2G28410	down	-3.7966	0.00114643	-3.34859	0.000766161	0.000383661	0.00547553	2.9823	2.80506	4.03985	2.40229	2.68199	0.451933	0.659759	0	-0.141238	0.842754	-0.4622	-0.239316	-2.01643	-1.85082	-1.93362
AT1G35183	down	-3.7709	0.0428178	-4.23276	0.0181821	0.000151443	0.000151443	0.790113	0.891284	0.618322	1.07867	0.572173	0	0	0	0.24746	-0.420196	0.705811	-0.533075	-1.93259	-1.93259	-1.93259
AT5G14210	down	-1.53571	0.046816	-2.00202	0.00630845	0.0168427	0.0375096	2.89914	2.94784	3.44449	2.71223	2.49198	1.62958	1.38096	0	0.0675237	0.756043	-0.259119	-0.564448	-1.76003	-2.1047	-1.93236
AT1G60270	down	-3.22205	0.000306414	-2.09239	0.00557412	3.26093e-05	0.00209658	3.71108	3.20287	4.59799	3.05638	3.98708	0.840158	1.5026	0	-0.386583	0.674653	-0.498019	0.20995	-2.18386	-1.67995	-1.9319
AT2G04530	down	-1.30651	0.0129448	-1.23068	0.0114247	7.65559e-06	2.21814e-07	3.74563	3.3499	4.38999	3.69245	3.5502	2.13903	2.32267	0	-0.504682	0.821753	-0.0678317	-0.249239	-2.04891	-1.81472	-1.93181
AT3G09035	down	-1.29059	0.00960421	-2.01768	3.01e-05	0.000246777	0.0487107	3.77612	3.54894	4.37773	3.88694	3.29089	2.32568	1.72766	0	-0.250864	0.6643	0.122364	-0.5358	-1.60161	-2.26195	-1.93178
AT4G01080	down	-2.23028	0.00363597	-2.58122	0.000485315	0.00367232	0.00074709	5.53839	5.50795	5.3164	4.81216	6.51703	3.23585	3.10374	0	-0.0248185	-0.181002	-0.592158	0.797978	-1.87747	-1.98519	-1.93133
AT5G54180	down	-1.63478	0.000404289	-1.35369	0.000686685	0.00708039	0.0192909	3.09842	3.18358	3.52705	2.91993	2.76313	1.73964	2.07433	0	0.138017	0.694729	-0.289304	-0.543442	-2.20232	-1.65986	-1.93109
AT5G11790	down	-2.59223	1.57e-05	-1.63664	0.00388907	9.64899e-05	0.00514251	4.58355	4.6131	5.19847	4.09833	4.4243	2.18688	3.09067	0	0.0293309	0.610307	-0.48158	-0.158058	-2.37868	-1.48168	-1.93018
AT2G34680	down	-2.07139	0.00531969	-2.63879	0.000256817	1.95335e-05	0.00160377	2.84389	2.98045	3.46727	2.40561	2.52224	1.34987	1.07391	0	0.161456	0.737036	-0.518193	-0.3803	-1.76644	-2.09271	-1.92957
AT1G68520	down	-2.67929	3e-05	-3.30978	1.13e-07	0.00841946	0.0401165	6.15138	7.05509	5.96471	5.64308	5.94266	4.26409	3.73442	0	0.809957	-0.167311	-0.455577	-0.187069	-1.69151	-2.16624	-1.92888
AT5G06690	down	-2.40208	0.000572241	-1.70427	0.00273009	0.00253235	0.0123773	3.13397	2.76998	2.63917	3.80014	3.32658	0.973362	1.51065	0	-0.371003	-0.504334	0.679013	0.196323	-2.20225	-1.6546	-1.92843
AT1G69080	down	-4.83656	0.00778666	-4.33663	0.0158107	0.000143375	0.000237909	1.38679	1.32797	1.97629	1.04532	1.19758	0	0.0838966	0	-0.0843491	0.84526	-0.489615	-0.271296	-1.98846	-1.86817	-1.92831
AT2G26330	down	-4.32681	3.11e-07	-2.86576	2.47e-05	1.07093e-05	0.00924487	4.00134	4.10716	5.04128	3.46463	3.39231	0.83589	1.68307	0	0.0744062	0.731265	-0.377412	-0.42826	-2.2259	-1.63017	-1.92803
AT4G34900	down	-2.41872	0.027308	-1.9057	0.047441	0.000215703	2.14522e-05	2.22228	2.0928	2.81282	2.09954	1.88397	0.680261	0.994535	0	-0.180095	0.821359	-0.170716	-0.470548	-2.14473	-1.70762	-1.92617
AT2G43550	down	-2.76846	0.000129886	-2.35127	0.000550152	5.26261e-07	2.36239e-06	4.92126	4.20352	5.2563	4.21613	6.00907	1.79045	2.23226	0	-0.475061	0.221762	-0.466716	0.720016	-2.07225	-1.77982	-1.92603
AT4G00950	down	-4.01882	4.96e-05	-3.57339	1.88e-05	0.00311102	0.0135499	3.09051	3.32019	3.86889	3.08729	2.08565	0.524493	0.769418	0	0.181022	0.613465	-0.00253671	-0.79195	-2.02234	-1.82931	-1.92583
AT4G01580	down	-5.42844	0.00133945	-4.52298	0.00101079	6.24348e-07	1.88851e-06	2.7664	2.52171	3.93434	2.35313	2.25641	0.129743	0.282111	0	-0.184023	0.878385	-0.310812	-0.38355	-1.98297	-1.86838	-1.92567
AT4G00360	down	-1.80001	0.00441322	-2.70031	7.19e-06	0.0095109	0.0180566	6.3585	6.68859	6.78675	6.33379	5.62487	4.76737	4.05472	0	0.326254	0.423275	-0.0244193	-0.72511	-1.57264	-2.27701	-1.92483
AT1G29500	down	-4.9487	8.83e-07	-5.24041	4.48e-08	0.00191975	0.0027925	3.57882	4.2155	4.55638	2.87143	2.67196	0.587823	0.445391	0	0.400059	0.614249	-0.444488	-0.56982	-1.87938	-1.96888	-1.92413
AT1G17220	down	-1.67681	7.04e-11	-1.24739	3.61e-07	8.54348e-09	0.0213927	6.06889	6.28841	6.39016	5.72739	5.8696	4.53333	5.08215	0	0.334824	0.490025	-0.520878	-0.303972	-2.34216	-1.50505	-1.92361
AT1G15180	down	-3.14372	1.39e-07	-2.63112	2.42e-06	4.12003e-06	5.60467e-07	4.80148	5.0943	5.65565	4.16074	4.29523	2.14304	2.69686	0	0.236503	0.689886	-0.517506	-0.408883	-2.14714	-1.69984	-1.92349
AT1G14280	down	-1.14862	0.0175709	-2.26598	9.65e-07	1.83243e-06	0.0406997	5.02177	4.72042	5.39196	5.42281	4.55189	3.5605	2.55362	0	-0.294955	0.36233	0.392526	-0.459902	-1.43024	-2.41574	-1.92299
AT4G37450	down	-2.82165	0.00584893	-2.4603	0.0134801	1.00153e-05	0.040712	5.4218	4.61875	6.10551	6.46205	4.50089	2.14441	2.21067	0	-0.475985	0.405251	0.616582	-0.545848	-1.94259	-1.90331	-1.92295
AT4G26760	down	-2.91572	0.00139034	-3.20385	0.000188514	1.58074e-06	0.00290854	2.88259	2.61919	3.86306	2.65992	2.38819	0.784304	0.715705	0	-0.237327	0.883405	-0.200626	-0.445452	-1.89056	-1.95237	-1.92146
AT5G14220	down	-1.22042	0.00324556	-1.26123	0.000577207	0.00927443	0.0387556	3.09529	3.02605	3.61806	2.75318	2.98386	1.90565	1.92361	0	-0.112662	0.850612	-0.556642	-0.181307	-1.93567	-1.90645	-1.92106
AT4G30950	down	-2.05613	3.83e-12	-1.86329	1.24e-10	2.01052e-07	2.68128e-06	7.64329	7.82498	8.33065	7.16276	7.25478	5.6833	6.01905	0	0.194679	0.736502	-0.514893	-0.416289	-2.10014	-1.74038	-1.92026
AT2G48070	down	-1.45865	6.81e-06	-2.03846	7.6e-11	1.64611e-06	0.0335835	6.0746	6.31631	6.55431	5.62471	5.80308	4.79482	4.33137	0	0.307043	0.609375	-0.571498	-0.344919	-1.6257	-2.21442	-1.92006
AT4G30400	down	-1.81357	0.00376343	-2.40034	7.6e-05	0.0144221	0.0252738	3.47051	3.42325	4.22331	3.3877	2.84776	1.79561	1.35749	0	-0.0478858	0.762894	-0.083916	-0.631092	-1.69734	-2.14134	-1.91934
AT3G59890	down	-2.53989	0.0497875	-2.88464	0.0183101	0.00152534	0.00570948	1.92229	1.87395	2.49111	1.43676	1.88732	0.578064	0.499566	0	-0.0670524	0.789083	-0.673524	-0.0485071	-1.86472	-1.97361	-1.91917
AT5G53580	down	-2.02508	2.02e-12	-2.00376	1.39e-13	7.98277e-07	0.0216513	5.3458	5.67224	5.91086	4.8806	4.91949	3.61801	3.74152	0	0.375588	0.650136	-0.535235	-0.490488	-1.98791	-1.8458	-1.91685
AT1G14150	down	-3.25584	3.27e-10	-2.57964	8.78e-08	0.012471	6.19952e-07	4.95987	5.53958	5.39424	4.64829	4.25736	2.33659	3.17436	0	0.503769	0.377467	-0.270758	-0.610478	-2.27962	-1.5516	-1.91561
AT5G20740	down	-4.61066	0.00112932	-5.62373	0.000206081	1.48211e-05	1.29356e-06	3.09612	3.12257	4.31335	2.68551	2.26306	0.366739	0.244914	0	0.0181565	0.835556	-0.281863	-0.571849	-1.87356	-1.95719	-1.91538
AT4G31590	down	-3.89421	7.08e-07	-2.88319	4.41e-05	5.18047e-06	0.000157722	4.0967	4.59463	4.71611	3.34715	3.7289	1.34999	2.16567	0	0.407577	0.507016	-0.613535	-0.301057	-2.24829	-1.58062	-1.91446
AT1G73530	down	-1.03714	0.00072318	-1.83552	4.44e-10	2.23938e-05	0.0129311	5.77187	5.79536	6.28176	5.51301	5.49736	4.67592	4.01817	0	0.0315493	0.684833	-0.347677	-0.368705	-1.47198	-2.35541	-1.91369
AT3G52910	down	-3.14764	0.0262462	-2.83117	0.0252939	0.000415377	0.00890096	2.4663	2.21127	3.37338	1.94276	2.33781	0.463153	0.534447	0	-0.248055	0.882248	-0.509219	-0.124974	-1.94833	-1.87899	-1.91366
AT4G25960	down	-2.0001	8.27e-06	-1.53072	0.000331231	0.0194072	0.00834455	4.71839	4.92111	5.16466	4.56613	4.22166	2.88097	3.51114	0	0.254776	0.560857	-0.191356	-0.624277	-2.30921	-1.51724	-1.91323
AT5G66520	down	-5.10751	0.00100692	-4.15452	0.00048072	6.37151e-06	2.12065e-05	2.0574	2.32304	2.62885	1.2475	2.0302	0.132952	0.273419	0	0.273805	0.589001	-0.834772	-0.0280343	-1.98354	-1.83876	-1.91115
AT5G43810	down	-1.88887	0.00157377	-2.15174	0.000106636	0.00168582	3.43988e-06	2.9708	2.83472	3.76361	2.65289	2.63196	1.32882	1.28257	0	-0.156075	0.909342	-0.364631	-0.388636	-1.88332	-1.93637	-1.90984
AT3G63490	down	-1.80477	2.12e-07	-1.808	1.05e-07	3.78823e-07	0.0226008	7.8537	8.04197	8.49114	7.24824	7.63345	6.13552	6.24601	0	0.216191	0.731988	-0.695264	-0.252914	-1.97303	-1.84615	-1.90959
AT5G16000	down	-4.0727	0.00110762	-3.28576	0.000835608	0.000116613	0.00514996	2.48046	2.66294	3.26829	2.21704	1.77358	0.366739	0.593731	0	0.17421	0.752112	-0.251482	-0.674839	-2.0179	-1.8012	-1.90955
AT4G39460	down	-1.56382	0.000158497	-1.48327	0.000228175	2.83871e-07	0.00196284	5.98539	5.89898	6.74381	5.60377	5.69499	4.28717	4.43726	0	-0.101635	0.892078	-0.448873	-0.34157	-1.99748	-1.82095	-1.90921
AT3G48550	down	-4.84173	0.00149776	-2.88531	0.00197529	4.38129e-06	2.54722e-05	2.24967	2.06377	3.03099	1.62053	2.28339	0.129743	0.562636	0	-0.186416	0.783502	-0.630899	0.033813	-2.12584	-1.69174	-1.90879
AT3G27690	down	-4.38584	4.35e-06	-5.18447	2.48e-08	0.0185367	0.000189303	8.01762	9.15155	8.98947	7.22519	6.70426	4.34755	3.99337	0	0.56253	0.482125	-0.393115	-0.65154	-1.82067	-1.99638	-1.90853
AT1G08660	down	-1.27174	0.000836364	-1.14175	0.00127804	4.42732e-06	0.0493984	4.09826	4.17066	4.56079	3.76479	3.89678	2.89248	3.08363	0	0.124394	0.794674	-0.572922	-0.346146	-2.07163	-1.74322	-1.90743
AT2G42380	down	-4.61325	0.0024462	-5.22261	0.000520013	7.7512e-05	2.18031e-06	2.82575	2.63039	3.81722	3.08181	1.77356	0.236996	0.155308	0	-0.141624	0.718759	0.185633	-0.762768	-1.87669	-1.93591	-1.9063
AT1G12460	down	-2.34042	0.0072036	-3.6798	7.64e-05	0.00324571	6.01418e-06	2.99644	2.88279	3.91475	2.866	2.32223	1.11104	0.617677	0	-0.101581	0.820786	-0.116591	-0.602613	-1.68517	-2.12614	-1.90566
AT2G22170	down	-3.26305	0.0014895	-3.10799	0.00143137	0.0122499	0.0158088	4.02406	3.86826	5.2574	3.02689	3.94371	1.11399	1.273	0	-0.104879	0.830207	-0.671237	-0.0540908	-1.95888	-1.85184	-1.90536
AT4G37740	down	-2.34028	0.0265592	-2.17131	0.0177827	0.000844422	2.36675e-05	2.03928	1.89313	2.69113	1.64914	1.9237	0.57837	0.712424	0	-0.199764	0.891011	-0.533265	-0.157982	-1.99689	-1.81365	-1.90527
AT5G57780	down	-3.02939	0.00550911	-4.23913	0.000437821	0.000241803	5.77393e-05	2.38082	2.34192	3.22543	2.23907	1.71686	0.581675	0.296754	0	-0.0381348	0.828015	-0.138962	-0.650918	-1.76381	-2.04313	-1.90347
AT5G61570	down	-2.38206	0.000408328	-2.2612	0.000134149	9.71041e-06	0.0161571	3.05227	2.87689	3.73562	3.34253	2.25402	1.08942	1.12723	0	-0.171718	0.669097	0.28421	-0.781589	-1.92189	-1.88487	-1.90338
AT1G29460	down	-4.20238	4.49e-07	-4.93014	6.9e-09	0.0142652	1.24945e-06	3.06171	3.87377	3.627	2.42948	2.3166	0.643249	0.595217	0	0.632526	0.440313	-0.492456	-0.580383	-1.88379	-1.9212	-1.90249
AT1G26761	down	-2.54904	3.46e-06	-2.39337	1.14e-06	0.0252957	4.82345e-06	3.36253	3.7746	3.87202	3.07055	2.73294	1.48058	1.80443	0	0.455609	0.563324	-0.322823	-0.696109	-2.08078	-1.72272	-1.90175
AT2G20300	down	-2.20542	0.000211883	-1.69031	0.00171116	9.22718e-05	0.0186748	3.56195	3.63289	4.24829	3.1679	3.19871	1.6983	2.15971	0	0.0826091	0.799196	-0.45884	-0.422966	-2.17009	-1.63281	-1.90145
AT1G14180	down	-2.51717	0.0264972	-3.40822	0.00392129	1.6193e-05	0.0143501	1.91546	1.75068	2.62862	1.49022	1.79234	0.494033	0.309964	0	-0.206986	0.895792	-0.53415	-0.154656	-1.78546	-2.01667	-1.90107
AT4G00560	down	-1.06611	0.0114986	-1.01665	0.0118338	0.00403296	1.66585e-05	4.73867	4.7194	5.21969	4.50214	4.51345	3.60332	3.79015	0	-0.0351405	0.877394	-0.431446	-0.410807	-2.07092	-1.73012	-1.90052
AT4G31210	down	-2.42631	1.59e-06	-1.07123	0.0170771	9.52394e-05	8.19507e-05	4.27272	4.11892	4.60995	4.0367	4.32532	1.94908	3.18613	0	-0.171288	0.375565	-0.26285	0.0585733	-2.5878	-1.21012	-1.89896
AT1G34065	down	-3.45391	0.0154475	-2.20101	0.0228698	1.54388e-05	0.0174591	1.96071	1.70586	2.68813	1.6106	1.83827	0.25919	0.582479	0	-0.314275	0.89702	-0.431748	-0.150997	-2.09826	-1.69959	-1.89893
AT3G56060	down	-1.68695	0.0191617	-2.55371	0.000293736	0.0291169	2.96696e-05	3.37679	3.30142	4.17242	3.30908	2.72426	1.70795	1.35123	0	-0.0774506	0.817564	-0.0695791	-0.670535	-1.71487	-2.08143	-1.89815
AT5G14060	down	-2.0038	5.52e-08	-2.08923	4.65e-09	2.36711e-07	0.00910538	5.96002	6.4201	6.35167	5.76009	5.30822	4.35916	4.39842	0	0.552252	0.470107	-0.239981	-0.782378	-1.92156	-1.87444	-1.898
AT1G45207	down	-2.52857	0.0319458	-2.37143	0.0245673	0.0395973	0.000145006	2.17425	1.96445	2.93368	1.81409	1.98479	0.45808	0.740295	0	-0.25276	0.914914	-0.433896	-0.228258	-2.06754	-1.72754	-1.89754
AT3G13690	down	-1.18411	0.016856	-1.60993	0.000581984	0.0286945	0.004725	3.46396	3.54499	3.96217	3.27785	3.07083	2.38385	2.19113	0	0.130648	0.803288	-0.300072	-0.633865	-1.74151	-2.05225	-1.89688
AT2G36490	down	-2.10067	7.96e-06	-1.57848	0.000219015	0.00226069	0.00831487	4.11208	4.14881	4.49329	3.40118	4.40505	2.18093	2.7581	0	0.0423992	0.44009	-0.820711	0.338223	-2.22946	-1.56313	-1.89629
AT4G30720	down	-2.45294	4.09e-06	-1.68989	0.000672909	0.000302794	2.71214e-05	4.42303	4.59944	5.03346	3.99048	4.06876	2.30814	3.08004	0	0.193247	0.66869	-0.473843	-0.388094	-2.31677	-1.47118	-1.89398
AT5G13730	down	-2.60515	2.12e-08	-2.16184	3.91e-08	2.26879e-07	0.0164031	3.61974	4.0116	4.14872	2.93441	3.38423	1.71162	2.06199	0	0.428237	0.578083	-0.748947	-0.257373	-2.08524	-1.70235	-1.8938
AT3G58100	down	-4.54121	0.00203092	-2.03088	0.00678607	8.50985e-06	0.0423501	1.93787	1.83956	2.61683	1.72798	1.56709	0.129448	0.676644	0	-0.121266	0.837571	-0.258912	-0.457393	-2.23086	-1.55584	-1.89335
AT3G54880	down	-1.56035	0.0042091	-2.33169	1.04e-05	5.72773e-06	0.0107182	4.60183	4.19491	5.6595	4.40129	4.15163	2.68072	2.01808	0	-0.341659	0.88803	-0.168376	-0.377996	-1.61299	-2.16934	-1.89117
AT5G45950	down	-3.89643	1.26e-06	-2.91625	0.000200765	0.000132277	0.00698825	5.83352	6.27493	6.86445	5.11414	5.08056	2.56318	3.45896	0	0.295759	0.690751	-0.482004	-0.504505	-2.19121	-1.59102	-1.89111
AT5G19170	down	-3.71468	0.0247542	-3.60471	0.0125156	1.11901e-05	1.34408e-05	2.46473	1.72118	3.38952	2.05951	2.68873	0.262695	0.328811	0	-0.64811	0.806075	-0.353211	0.195247	-1.91938	-1.86175	-1.89057
AT1G49760	down	-1.54673	0.000736862	-1.02598	0.0253905	7.98984e-07	0.00504613	6.09754	5.96606	6.65698	6.00266	5.76446	4.42416	5.04979	0	-0.182507	0.776537	-0.131693	-0.462337	-2.32276	-1.45435	-1.88855
AT1G51400	down	-1.76231	0.00122261	-2.81135	5.43e-08	0.000644176	0.0286062	8.2928	8.73168	8.74873	8.01499	7.6758	6.83947	5.90016	0	0.430704	0.447433	-0.27263	-0.605507	-1.42625	-2.34806	-1.88715
AT1G29980	down	-3.81318	0.0139528	-2.30503	0.0396035	2.84757e-05	0.0372003	2.27319	1.97111	3.10499	1.72454	2.29212	0.25919	0.652211	0	-0.313634	0.863613	-0.569632	0.0196529	-2.09102	-1.68297	-1.887
AT1G70760	down	-2.25977	4.13e-08	-3.01205	5.47e-14	0.00229627	0.0228141	6.37779	6.8041	7.18137	5.72547	5.80024	4.44523	3.76348	0	0.353816	0.666937	-0.541407	-0.479346	-1.60396	-2.16978	-1.88687
AT5G59020	down	-3.45472	0.0108763	-2.94089	0.00342626	0.000246382	0.000709894	1.46546	1.74085	1.80649	1.00537	1.30914	0.25919	0.429059	0	0.463375	0.573817	-0.77416	-0.263031	-2.02971	-1.74388	-1.8868
AT4G22560	down	-4.96429	0.00407242	-2.48114	0.0365732	5.48792e-05	0.00328024	2.11905	2.00969	2.89831	1.67555	1.89265	0.129448	0.706341	0	-0.121109	0.862997	-0.491157	-0.250732	-2.2034	-1.56451	-1.88396
AT1G80690	down	-2.34615	0.0216993	-1.99872	0.0247466	0.0168647	0.0354663	2.11412	2.12404	2.70336	2.03288	1.59621	0.637854	0.887528	0	0.0138176	0.82129	-0.113239	-0.721869	-2.05764	-1.70965	-1.88364
AT5G58310	down	-3.8131	0.00017674	-4.87351	3.04e-06	0.000709772	9.08178e-06	3.11922	4.15778	3.07344	2.91371	2.33195	1.06099	0.667061	0	0.8674	-0.0382363	-0.171641	-0.657523	-1.71903	-2.04803	-1.88353
AT3G58000	down	-3.36181	0.000151474	-1.76293	0.00334838	0.0127943	0.0104304	2.62596	2.71895	3.07678	2.06968	2.63841	0.517016	1.45822	0	0.106872	0.518078	-0.639265	0.0143151	-2.42356	-1.34195	-1.88276
AT3G20350	down	-4.2676	0.000949472	-2.04057	0.00227069	1.48274e-06	0.0220707	2.47712	2.37108	3.2994	1.90027	2.33772	0.2624	0.941088	0	-0.106403	0.825087	-0.578815	-0.13987	-2.22228	-1.54127	-1.88177
AT5G63780	down	-2.71591	1.29e-09	-2.66246	5.27e-11	0.000526782	0.0150578	3.96563	4.44315	4.64034	3.27598	3.50303	1.94026	2.08035	0	0.459484	0.649225	-0.663593	-0.445116	-1.94885	-1.81405	-1.88145
AT1G09010	down	-1.07372	0.0114312	-1.13867	0.00541814	0.00304452	0.00862759	5.87509	6.07911	6.16475	5.54237	5.71414	4.97662	5.06361	0	0.448683	0.637017	-0.73173	-0.35397	-1.97591	-1.78462	-1.88027
AT5G02890	down	-3.59818	0.0269184	-5.24356	0.00344133	0.00101765	6.23948e-05	2.59559	2.27274	3.76706	2.00687	2.33568	0.448322	0.155308	0	-0.264355	0.959236	-0.482058	-0.212823	-1.75824	-1.99817	-1.8782
AT3G48200	down	-2.39105	1.02e-11	-2.18062	1.43e-11	4.28199e-05	9.46939e-07	4.70992	5.22394	5.13198	4.48425	3.99952	2.84936	3.18983	0	0.570805	0.468689	-0.250604	-0.78889	-2.06612	-1.68804	-1.87708
AT1G67830	down	-3.62825	4.56e-05	-2.8671	6.42e-05	4.89602e-06	4.52122e-05	3.16005	3.22422	4.24829	2.65934	2.50836	0.683566	1.08233	0	0.0528126	0.895688	-0.412116	-0.536385	-2.03831	-1.7101	-1.87421
AT3G06140	down	-5.05179	0.00186778	-3.76917	0.0110944	4.01911e-06	0.000374832	1.52371	1.49319	2.24891	1.22074	1.13202	0	0.155308	0	-0.0395541	0.939854	-0.39266	-0.507639	-1.97473	-1.77345	-1.87409
AT3G10080	down	-1.5292	0.0294402	-3.40353	1.6e-06	5.395e-05	0.0155511	4.20638	3.99436	5.0586	3.72572	4.04683	2.60315	1.22081	0	-0.173089	0.695753	-0.39241	-0.130254	-1.30887	-2.43741	-1.87314
AT3G12780	down	-1.51618	3.1e-07	-2.16563	2.67e-14	0.000178697	0.0389516	8.68002	9.0941	9.09864	8.25851	8.26882	7.45989	6.91994	0	0.520336	0.526038	-0.529668	-0.516706	-1.53321	-2.21171	-1.87246
AT5G58600	down	-2.57664	0.0128481	-1.70232	0.027666	3.49697e-06	0.0425784	2.22697	1.88428	3.04679	1.85785	2.11898	0.494033	0.755355	0	-0.400422	0.957916	-0.431304	-0.12619	-2.02487	-1.71952	-1.8722
AT4G19020	down	-2.40222	0.00576589	-1.62114	0.0174659	3.75343e-05	0.00158099	2.67685	2.12007	3.08504	2.17186	3.33044	0.683566	1.06734	0	-0.578437	0.424064	-0.524635	0.679008	-2.07081	-1.67211	-1.87146
AT5G51820	down	-1.86154	3.23e-07	-1.07964	0.00155646	0.00172474	0.0130536	4.88846	4.99875	5.28793	4.51185	4.7553	3.13415	3.97322	0	0.154471	0.559476	-0.527454	-0.186493	-2.457	-1.28184	-1.86942
AT3G05000	down	-1.19005	4.39e-05	-1.36747	8.48e-07	0.0165641	0.0369792	5.12995	5.32246	5.5901	4.80858	4.79867	4.04736	4.03022	0	0.329387	0.787316	-0.549872	-0.566831	-1.85232	-1.88166	-1.86699
AT5G43880	down	-2.40495	1.72e-05	-1.31157	0.00239889	0.00119111	1.04924e-05	3.22986	3.19146	3.81906	2.93863	2.97031	1.26386	2.15786	0	-0.0471763	0.723701	-0.357717	-0.318808	-2.41483	-1.31674	-1.86578
AT5G06270	down	-2.78161	8.7e-05	-1.73109	0.00777845	0.00441941	0.0169945	4.5939	3.9365	5.91601	4.00088	4.52221	1.43771	2.29691	0	-0.449765	0.904535	-0.405722	-0.0490484	-2.15934	-1.57151	-1.86542
AT2G26710	down	-5.25984	0.000120708	-4.41611	7.69e-06	5.94112e-06	9.79528e-06	2.33495	3.17107	2.60986	1.57682	1.98204	0.25919	0.494969	0	0.796443	0.261864	-0.722145	-0.336162	-1.97724	-1.75266	-1.86495
AT3G06430	down	-1.01078	0.0378374	-1.03303	0.0248733	0.015198	0.0301857	4.17524	4.05025	4.78048	3.92155	3.94866	2.9935	3.09761	0	-0.206195	0.998485	-0.418509	-0.373781	-1.94952	-1.77777	-1.86365
AT1G11790	down	-1.74107	1.41e-05	-2.57801	1.28e-10	3.32912e-05	4.35295e-05	4.19342	4.54267	4.76032	3.89717	3.5735	2.82932	2.27727	0	0.396535	0.643654	-0.336351	-0.703838	-1.54877	-2.17555	-1.86216
AT5G48460	down	-2.30853	0.000401751	-2.42024	6.05e-05	0.000254763	0.0300737	2.97672	3.18612	3.63215	2.88421	2.2044	1.33818	1.32697	0	0.237026	0.741901	-0.104711	-0.874216	-1.85472	-1.86741	-1.86107
AT2G46710	down	-2.40513	2.49e-05	-1.70304	0.000930916	0.0330963	0.00564666	3.74405	3.9447	4.40597	3.4294	3.19614	1.66362	2.41994	0	0.219205	0.723127	-0.343754	-0.598578	-2.27281	-1.44655	-1.85968
AT5G50450	down	-2.79931	0.000230772	-1.89583	0.00154123	4.75221e-05	0.030379	2.67914	2.83049	2.05881	2.53348	3.29379	0.85569	1.42167	0	0.182404	-0.747614	-0.175549	0.74076	-2.19759	-1.51548	-1.85653
AT5G17710	down	-1.42178	0.000554321	-1.19468	0.00333624	0.0193634	0.0079847	7.06344	7.06313	7.72803	6.71236	6.75027	5.5531	5.90598	0	-0.000444772	0.92493	-0.488623	-0.435861	-2.102	-1.61089	-1.85644
AT1G17700	down	-4.06353	0.0263681	-5.48718	0.00153695	0.00295758	0.00105139	1.31734	1.30504	1.94643	1.161	0.856893	0.129448	0	0	-0.0182291	0.932147	-0.231658	-0.68226	-1.76015	-1.95195	-1.85605
AT3G13175	down	-4.08631	0.021721	-3.68698	0.0205605	0.000132525	0.000132171	1.72841	1.43731	2.58612	1.54373	1.34648	0.132952	0.202008	0	-0.345816	1.01894	-0.219395	-0.453724	-1.89537	-1.81333	-1.85435
AT2G27040	down	-2.50546	4.52e-05	-1.48276	0.0047354	0.0315109	0.0131801	3.4184	3.50174	4.03155	3.17795	2.96237	1.28426	2.25592	0	0.0937283	0.689607	-0.270438	-0.512897	-2.40026	-1.30743	-1.85384
AT4G30180	down	-4.37283	0.0470855	-4.83469	0.0226801	0.00138775	0.00114257	1.38478	1.59091	1.82323	0.735738	1.38924	0.129743	0.118111	0	0.30306	0.644629	-0.954242	0.00655336	-1.8452	-1.8623	-1.85375
AT1G15980	down	-2.38701	8.93e-08	-2.19944	3.42e-07	3.41158e-05	0.0199695	5.7131	6.21178	6.34967	5.23523	5.05574	3.77274	4.04903	0	0.512389	0.654062	-0.49101	-0.675442	-1.99371	-1.70983	-1.85177
AT5G14410	down	-1.74202	0.00189038	-1.08281	0.042707	0.00347985	0.0162235	3.75599	3.8613	4.14161	3.58263	3.43841	2.26809	2.97545	0	0.171737	0.628863	-0.282704	-0.517896	-2.42641	-1.27287	-1.84964
AT1G70895	down	-4.67675	0.00156227	-2.73326	0.00138614	2.01483e-06	4.16939e-05	2.26994	2.04097	3.23051	2.2786	1.52967	0.129743	0.517429	0	-0.2175	0.912463	0.00822556	-0.703189	-2.033	-1.66473	-1.84887
AT4G23290	down	-1.81921	0.0106328	-5.60642	5.1e-09	0.00135122	0.000194923	3.85579	4.22708	3.76573	3.82516	3.60519	2.5099	0.399318	0	0.285824	-0.0693286	-0.0235802	-0.192916	-1.03609	-2.66085	-1.84847
AT4G13500	down	-1.52628	0.000282967	-3.39565	8.42e-16	7.79321e-06	0.00427275	5.52983	5.80336	5.78681	5.62668	4.90247	4.24925	2.63479	0	0.242102	0.227452	0.0857229	-0.555276	-1.13343	-2.56238	-1.84791
AT5G47440	down	-2.98254	0.0410062	-3.47437	0.0126866	0.0160439	0.000116896	1.32133	1.47226	1.80395	1.18139	0.827698	0.231815	0.202008	0	0.252396	0.807049	-0.233996	-0.825449	-1.82189	-1.87173	-1.84681
AT5G41460	down	-4.79009	0.00915971	-5.25195	0.00318574	0.00131782	0.00125659	1.84817	1.9219	2.71191	1.1943	1.56455	0.132952	0.126803	0	0.0792349	0.928153	-0.70262	-0.304768	-1.84311	-1.84972	-1.84642
AT2G33570	down	-2.49863	0.00303259	-2.47122	0.00183837	0.000131994	0.00240438	3.70524	3.36913	4.91934	3.64781	2.88469	1.38341	1.42408	0	-0.26958	0.973775	-0.0460646	-0.658131	-1.86224	-1.82963	-1.84593
AT1G11290	down	-2.00398	0.0105295	-3.3548	0.000167535	0.0172271	2.55791e-06	1.95296	2.3155	2.16196	2.01057	1.32381	0.921233	0.494969	0	0.537338	0.309759	0.085383	-0.93248	-1.52916	-2.16094	-1.84505
AT1G07490	down	-4.5381	0.00835595	-4.17323	0.00675664	0.000255187	0.000334568	1.6934	1.80233	2.46364	1.28192	1.22573	0.129743	0.2107	0	0.131931	0.932921	-0.498399	-0.566453	-1.89392	-1.79587	-1.84489
AT1G29510	down	-4.4508	2.76e-05	-5.94741	1.28e-06	0.000727937	1.18577e-05	3.11254	3.7317	4.19366	2.19395	2.33085	0.591948	0.328811	0	0.43034	0.751425	-0.63846	-0.543305	-1.75191	-1.9348	-1.84336
AT1G07485	down	-4.69446	0.00343515	-3.31713	0.0212674	1.19352e-05	0.0088679	1.42097	1.30204	2.14466	1.04517	1.192	0	0.227052	0	-0.167171	1.01728	-0.528257	-0.321853	-1.99744	-1.67827	-1.83786
AT4G31850	down	-2.2299	1.22e-07	-1.50992	3.94e-06	7.15808e-08	3.64959e-05	3.44037	3.64699	3.94137	2.88301	3.2901	1.7167	2.39377	0	0.273906	0.664149	-0.738853	-0.199202	-2.28497	-1.38742	-1.8362
AT3G24000	down	-2.98717	0.00381454	-2.47521	0.00564466	6.68433e-05	1.17922e-05	2.43767	2.59345	3.19991	1.79409	2.16323	0.680261	0.994535	0	0.17872	0.874475	-0.738342	-0.314853	-2.01618	-1.65563	-1.83591
AT1G29420	down	-3.8667	0.0188339	-2.9409	0.0229536	0.000490788	0.00189702	1.29071	1.41542	1.82254	1.00256	0.92231	0.132952	0.282111	0	0.211177	0.900541	-0.487916	-0.623802	-1.96041	-1.70784	-1.83412
AT5G48490	down	-4.33208	0.00555436	-5.65719	0.000260095	0.00736836	2.22562e-05	4.61148	5.03518	6.4879	3.6095	3.31335	1.01569	0.6301	0	0.205116	0.908385	-0.485065	-0.628436	-1.74074	-1.92741	-1.83408
AT4G36250	down	-3.13953	3.87e-09	-1.76971	0.000527354	3.43589e-07	0.0132217	5.56847	5.75562	6.36281	5.07797	5.07749	2.7553	4.12648	0	0.160842	0.682676	-0.421554	-0.421964	-2.41774	-1.2393	-1.82852
ATCG01090	down	-2.03069	2.57e-06	-3.23853	6.07e-15	0.00928199	0.018358	7.4508	8.19005	7.75281	6.93262	6.92774	6.03484	4.93129	0	0.686794	0.280583	-0.481423	-0.485954	-1.3155	-2.34076	-1.82813
AT1G47655	down	-2.26312	0.0216145	-2.52428	0.00513061	0.000495595	0.000377559	1.6801	1.82192	2.20188	1.50048	1.19612	0.598077	0.562636	0	0.235713	0.86721	-0.298531	-0.804392	-1.79835	-1.85725	-1.8278
AT4G24275	down	-5.74757	0.000924133	-5.24764	0.0022036	2.46643e-05	2.89558e-05	2.95621	1.85693	4.17445	3.67662	2.11684	0	0.118111	0	-0.69261	0.767562	0.453899	-0.528851	-1.86258	-1.78817	-1.82538
AT1G12860	down	-2.86924	1.95e-06	-1.80786	0.000847955	0.0107665	7.06669e-05	3.923	4.2749	4.44565	3.30754	3.6639	1.67907	2.72215	0	0.372931	0.553883	-0.652234	-0.27458	-2.37802	-1.27261	-1.82532
AT1G27210	down	-1.99259	0.00610328	-2.53843	0.00030382	3.90471e-05	0.000291493	3.05905	3.0644	3.97237	2.63457	2.56488	1.51782	1.28724	0	0.00589193	1.00614	-0.46763	-0.544405	-1.69789	-1.9519	-1.8249
AT1G79500	down	-2.36218	0.00025933	-1.65359	0.00349589	0.000299665	0.0150723	3.42257	3.3557	4.37968	3.01025	2.94463	1.38116	1.92979	0	-0.0690075	0.987803	-0.425534	-0.493262	-2.10687	-1.54064	-1.82376
AT1G07880	down	-4.53193	0.00234426	-2.59961	0.0211751	1.9178e-06	0.0120243	1.31633	1.28597	1.93131	0.886364	1.16168	0	0.310948	0	-0.0476705	0.96574	-0.675205	-0.242864	-2.06712	-1.57882	-1.82297
AT2G30150	down	-2.43053	1.91e-05	-2.44631	1.61e-06	0.000494162	0.00037566	2.8606	3.34387	3.35692	2.52578	2.21583	1.33818	1.45524	0	0.601596	0.617836	-0.416795	-0.802638	-1.89518	-1.74946	-1.82232
AT1G59720	down	-4.79028	0.00139166	-4.29034	0.00383539	3.27642e-06	0.000231002	1.3189	1.42524	1.90816	0.708281	1.2339	0	0.126803	0	0.154345	0.855243	-0.88623	-0.123358	-1.91421	-1.73017	-1.82219
AT5G48900	down	-3.82539	4.15e-05	-3.94408	7.19e-06	0.00077386	0.000208495	3.1811	3.74792	4.13123	2.52573	2.31953	0.903192	0.977042	0	0.460393	0.771729	-0.532316	-0.699806	-1.85021	-1.79022	-1.82022
AT5G44578	down	-1.86419	0.0409268	-3.36291	0.00122042	0.000135373	0.00516209	2.11227	2.0152	2.72627	2.28695	1.42066	0.912977	0.393861	0	-0.120905	0.764756	0.217563	-0.861414	-1.49375	-2.14032	-1.81703
AT2G17880	down	-3.10425	0.00844863	-2.40234	0.0139627	0.0454724	0.001007	1.8614	2.25441	2.14374	1.86008	1.18736	0.395046	0.804421	0	0.565818	0.406494	-0.00189417	-0.970417	-2.11112	-1.52174	-1.81643
AT2G18710	down	-1.22683	9.1e-05	-1.36943	5.41e-06	1.10964e-05	0.0437077	5.54806	5.6553	6.18892	5.21886	5.12917	4.35928	4.33061	0	0.16178	0.966777	-0.496633	-0.631924	-1.79337	-1.83662	-1.81499
AT4G38660	down	-3.3497	0.0130721	-2.72507	0.0293441	9.689e-05	0.00311249	3.31071	2.93677	4.69142	2.56381	3.05084	0.767597	1.12065	0	-0.286775	1.05888	-0.572803	-0.199298	-1.95033	-1.67957	-1.81495
AT2G34060	down	-2.98066	0.0120518	-3.51189	0.00231015	0.0118431	0.000796166	1.378	1.86307	1.44365	1.37758	0.827698	0.366444	0.273419	0	0.832011	0.112598	-0.000721622	-0.943888	-1.73504	-1.8946	-1.81482
AT1G14700	down	-3.36332	5.36e-07	-2.89983	4.82e-07	0.0104016	0.00601824	3.38784	3.87347	4.31455	2.87134	2.492	1.05438	1.46147	0	0.413012	0.788128	-0.439265	-0.761875	-1.98452	-1.6383	-1.81141
AT4G19380	down	-5.81506	0.00102559	-5.31512	0.00239494	7.02853e-05	0.000129723	1.83753	2.01137	2.7872	1.27686	1.2747	0	0.118111	0	0.177003	0.966942	-0.570877	-0.573068	-1.87096	-1.7507	-1.81083
AT5G66310	down	-2.85422	0.00914516	-2.75593	0.00357519	4.69754e-05	0.034854	2.08646	1.89604	2.98516	1.99617	1.46846	0.494033	0.526183	0	-0.218719	1.03228	-0.103705	-0.709854	-1.82911	-1.79218	-1.81064
AT5G63470	down	-1.43324	0.00701653	-1.57582	0.0017422	1.9507e-05	0.0320088	3.46692	3.93516	3.57279	3.25681	3.10294	2.55848	2.5721	0	0.939255	0.212367	-0.421481	-0.730141	-1.82231	-1.79498	-1.80864
AT5G13770	down	-1.22965	0.000460861	-1.29737	0.000133904	0.00109267	0.0447058	6.01869	6.29028	6.38283	5.47003	5.93164	4.95663	5.04722	0	0.482935	0.647515	-0.975648	-0.154802	-1.88858	-1.7275	-1.80804
AT3G10840	down	-3.55654	7.09e-07	-2.58187	1.85e-06	0.00043961	0.00109646	3.05277	3.53518	3.82535	2.55983	2.29071	0.839106	1.45619	0	0.457099	0.732038	-0.467071	-0.722066	-2.09749	-1.51279	-1.80514
AT1G18400	down	-3.16478	0.0287218	-4.31082	0.0057253	0.00330301	0.000151141	2.34063	1.87651	3.59461	2.15405	1.73737	0.322485	0.2107	0	-0.403759	1.09087	-0.162314	-0.524793	-1.75564	-1.85289	-1.80427
AT2G18560	down	-2.26299	9.37e-06	-2.58265	7.76e-08	2.33344e-05	0.0312141	2.8104	3.42263	3.1721	2.32568	2.32119	1.51788	1.33109	0	0.794997	0.469669	-0.62942	-0.635246	-1.67837	-1.92091	-1.79964
AT1G67700	down	-1.32386	2.07e-05	-1.78176	2.68e-09	1.30775e-05	0.0207856	6.88597	7.09389	7.5833	6.5308	6.33587	5.67041	5.31179	0	0.267806	0.898165	-0.457451	-0.70852	-1.56564	-2.02754	-1.79659
AT3G29370	down	-4.60958	0.0304126	-5.07144	0.0136416	0.000450399	0.000450399	1.48385	1.14014	2.41488	1.18288	1.19752	0	0	0	-0.416142	1.1272	-0.364388	-0.346668	-1.79652	-1.79652	-1.79652
AT2G43530	down	-1.58976	0.00543913	-1.56329	0.00498435	0.00116804	0.0316852	6.68612	6.06781	6.44518	6.13531	8.09619	4.37323	4.48702	0	-0.490749	-0.191236	-0.437177	1.11916	-1.83573	-1.74541	-1.79057
AT5G42040	down	-2.58439	0.0307649	-1.90585	0.0354348	2.14967e-05	0.0396782	1.57875	1.59892	2.01412	1.77915	0.922799	0.392143	0.534756	0	0.0323811	0.69879	0.321647	-1.05282	-1.90454	-1.67564	-1.79009
AT5G02865	down	-4.16444	0.0128481	-4.6263	0.00420977	0.00229427	0.00229427	0.664633	1.00642	0.772119	0.507406	0.37258	0	0	0	0.920422	0.289454	-0.4234	-0.786477	-1.78981	-1.78981	-1.78981
AT4G33790	down	-5.47029	0.0071824	-3.98138	0.0348244	0.00121959	0.0160601	0.943958	1.38196	1.02514	0.656317	0.712423	0	0.244914	0	0.954052	0.176829	-0.626546	-0.504335	-2.05615	-1.52267	-1.78941
AT5G24105	down	-2.3686	0.00872075	-5.48311	5.4e-05	0.0317249	5.56217e-06	2.84635	2.94701	4.08111	2.12373	2.23354	1.01156	0.202008	0	0.08022	0.984003	-0.575865	-0.488358	-1.46217	-2.10732	-1.78474
AT2G21050	down	-4.66333	0.00203694	-2.73041	0.00966141	1.37014e-05	0.00158167	3.23346	2.58075	4.90011	2.72029	2.73269	0.2624	0.887528	0	-0.437797	1.11788	-0.344198	-0.335886	-1.99279	-1.5735	-1.78315
AT2G37790	down	-3.75056	4.52e-08	-1.98688	0.000534352	0.00232962	0.000141901	4.28785	4.29647	5.44011	3.73737	3.67745	1.19163	2.66317	0	0.00651095	0.870404	-0.415826	-0.461089	-2.33884	-1.22726	-1.78305
AT4G14550	down	-2.83361	0.000426455	-2.5636	0.000687979	0.0260713	0.00647798	3.81045	3.90881	5.13512	3.07313	3.12474	1.30388	1.7653	0	0.0770015	1.03699	-0.577198	-0.536791	-1.96222	-1.60101	-1.78161
AT2G02500	down	-1.01218	0.0437121	-1.61055	0.000673598	0.00202412	0.0318904	3.6172	3.52813	4.34619	3.32036	3.2741	2.61677	2.14884	0	-0.128416	1.05106	-0.427979	-0.494668	-1.44242	-2.11708	-1.77975
AT3G15540	down	-2.08274	0.0192424	-3.68268	0.000170159	0.0154478	0.000297457	2.8682	2.74821	4.09102	2.59247	2.04109	1.07211	0.499566	0	-0.102543	1.04502	-0.235632	-0.706846	-1.53493	-2.02423	-1.77958
AT1G49580	down	-2.60964	0.00732683	-2.32365	0.0059155	0.00114039	0.0194563	2.01069	2.2392	2.68595	1.63074	1.48689	0.683748	0.785052	0	0.317697	0.938828	-0.52826	-0.728266	-1.84489	-1.70405	-1.77447
AT1G12330	down	-3.29864	2.83e-05	-1.35377	0.0262182	0.00662293	0.0337282	3.27626	3.23681	4.02579	3.17907	2.66339	0.781924	2.15753	0	-0.0386715	0.734619	-0.095266	-0.600682	-2.44473	-1.09649	-1.77061
AT3G54260	down	-1.88532	0.0130647	-2.6909	0.000452272	0.0327065	0.00235138	2.15404	2.35611	2.81876	1.92718	1.51412	0.975096	0.748828	0	0.276896	0.910882	-0.310868	-0.87691	-1.61555	-1.92561	-1.77058
AT3G13510	down	-3.53754	2.17e-06	-3.46956	4.68e-07	0.00649294	0.0486232	3.52725	4.13779	4.6892	2.5982	2.68381	1.11345	1.17408	0	0.45352	0.863117	-0.690115	-0.626522	-1.79302	-1.74798	-1.7705
AT4G35920	down	-1.9361	0.000989534	-1.46297	0.00620589	1.93467e-05	0.00574613	3.44451	3.41805	4.33059	3.02068	3.00871	1.75387	2.19732	0	-0.0318854	1.06793	-0.510809	-0.525231	-2.03759	-1.50314	-1.77036
AT2G35260	down	-2.82584	1.78e-20	-2.34729	1.82e-15	7.79099e-05	0.000467251	7.0651	7.80107	7.69158	6.48678	6.28097	4.86993	5.49492	0	0.691083	0.588272	-0.543052	-0.736303	-2.06129	-1.47442	-1.76786
AT3G28860	down	-2.93996	2.03e-05	-1.47932	0.0218717	2.48024e-05	0.00160062	4.29765	4.26684	5.26723	3.86413	3.79239	1.73124	3.00512	0	-0.0282034	0.887608	-0.396862	-0.462542	-2.34942	-1.18325	-1.76634
AT4G23440	down	-2.49428	0.0027532	-2.36163	0.00107332	7.92202e-05	0.000266509	2.0905	2.29801	2.6746	2.02503	1.36437	0.803228	0.885706	0	0.293983	0.827509	-0.0927514	-1.02874	-1.82373	-1.70688	-1.7653
AT4G20940	down	-4.30087	0.0159719	-4.76273	0.00575102	9.32951e-05	8.83108e-05	1.84172	1.58599	2.92694	1.14554	1.70839	0.129448	0.126803	0	-0.26328	1.11727	-0.716729	-0.137266	-1.76283	-1.76555	-1.76419
AT3G53750	down	-1.90304	0.00148226	-1.38746	0.0167933	0.000288209	0.021795	4.32562	4.47409	5.01938	3.64671	4.16228	2.65476	3.21661	0	0.188447	0.880532	-0.861672	-0.207307	-2.12066	-1.40756	-1.76411
AT3G03830	down	-4.89631	0.00417693	-5.35817	0.00123598	7.2785e-05	7.2785e-05	1.18656	1.50108	1.73553	0.938969	0.570664	0	0	0	0.467293	0.815616	-0.367855	-0.915054	-1.7629	-1.7629	-1.7629
AT1G78320	down	-4.3685	0.00550503	-2.95498	0.00692433	0.000375487	0.00227597	1.29951	1.79874	1.50079	1.09673	0.801787	0.132952	0.429059	0	0.863491	0.348137	-0.350743	-0.860885	-2.01773	-1.50557	-1.76165
AT3G28760	down	-2.42259	0.000190116	-1.88584	0.000300522	6.86595e-06	0.012125	2.61911	2.81959	3.40626	2.09253	2.15806	1.02639	1.38148	0	0.249206	0.978478	-0.654574	-0.573111	-1.97985	-1.53844	-1.75915
AT5G03995	down	-4.34567	0.00639187	-2.9913	0.0369017	7.61571e-06	0.000840996	1.02411	1.17149	1.37553	1.11297	0.436441	0	0.202008	0	0.280621	0.669117	0.169193	-1.11893	-1.94993	-1.5653	-1.75761
AT2G23590	down	-3.96278	0.00402732	-2.28278	0.00835613	0.00069099	0.00230537	2.17565	2.12727	3.15988	1.44564	1.96983	0.236996	0.784539	0	-0.05104	1.03823	-0.770073	-0.217114	-2.04504	-1.46745	-1.75624
AT5G55740	down	-3.43771	3.43e-05	-1.60803	0.00541839	9.10708e-05	0.000685042	2.68043	3.0647	3.09529	2.32756	2.23417	0.683748	1.80443	0	0.46933	0.506695	-0.430979	-0.545046	-2.43868	-1.06992	-1.7543
AT2G37450	down	-2.79937	7.1e-06	-2.54897	7.22e-06	0.00299454	0.0391268	3.42053	3.98277	4.23329	2.82613	2.63991	1.5234	1.76411	0	0.554107	0.800997	-0.585789	-0.769315	-1.86966	-1.63244	-1.75105
AT1G78820	down	-5.26572	2.68e-09	-3.82182	1.5e-06	0.000332119	0.00301645	4.50586	5.6828	5.34676	3.94907	3.04479	1.10781	2.18716	0	0.720433	0.514733	-0.340816	-0.894349	-2.08001	-1.41932	-1.74966
AT1G13670	down	-4.40507	0.0304627	-4.86693	0.0132745	0.000601966	0.000601966	1.24024	1.08797	2.06982	1.01666	0.786515	0	0	0	-0.2147	1.16966	-0.315233	-0.63973	-1.74868	-1.74868	-1.74868
AT1G74370	down	-1.6896	0.000327966	-1.56044	0.000466823	0.0133399	0.0442451	3.89918	4.39779	4.16775	3.4859	3.54528	2.75662	3.01493	0	0.859447	0.462928	-0.712364	-0.610012	-1.96941	-1.52417	-1.74679
AT5G46220	down	-3.62226	0.00739262	-3.16212	0.0019258	0.000439486	0.00628104	1.39108	1.8538	1.33575	1.66333	0.711449	0.2624	0.335584	0	0.739976	-0.0884876	0.435384	-1.08687	-1.80499	-1.68796	-1.74648
AT5G60490	down	-4.4958	0.0152775	-3.99587	0.0289359	0.000787825	0.00117346	1.58474	1.16305	2.60632	1.51374	1.05586	0	0.0838966	0	-0.477299	1.15629	-0.080369	-0.598627	-1.79373	-1.69877	-1.74625
AT3G07540	down	-3.51772	0.000881219	-1.90127	0.0237798	0.00244015	0.0192639	2.60572	2.87277	3.27944	2.58432	1.68633	0.5543	1.40415	0	0.285241	0.719598	-0.0228473	-0.981992	-2.1911	-1.28338	-1.73724
AT4G25830	down	-3.25673	0.000199499	-1.45815	0.0454	1.06499e-05	0.0421871	3.25196	3.19115	4.04999	3.45489	2.31182	0.858199	1.99144	0	-0.0577283	0.757515	0.192623	-0.892409	-2.27223	-1.19653	-1.73438
AT1G07450	down	-3.82096	0.00918596	-5.18472	0.000924009	0.000206328	2.24842e-05	1.61759	1.9068	2.45295	1.04004	1.07057	0.2624	0.0838966	0	0.345176	0.997014	-0.689315	-0.652875	-1.61744	-1.83048	-1.72396
AT5G36930	down	-1.05098	0.0389814	-1.76665	0.00023589	0.0124792	0.0401463	3.83789	4.26882	3.76155	3.94779	3.37339	3.19984	2.66619	0	0.82089	-0.145419	0.209353	-0.884824	-1.21543	-2.23199	-1.72371
AT2G41820	down	-4.09097	0.000931824	-2.88347	0.00175282	5.81491e-05	0.00041044	2.54299	2.52251	3.81202	1.75258	2.08484	0.392143	0.84472	0	-0.0183324	1.13608	-0.707599	-0.410148	-1.92551	-1.52035	-1.72293
AT1G70710	down	-2.966	0.0349842	-2.9087	0.0230419	0.0061046	0.000289772	1.97208	2.05211	2.94204	1.36772	1.52644	0.445112	0.562636	0	0.0935443	1.13368	-0.706367	-0.520862	-1.78471	-1.64734	-1.71603
AT2G18960	down	-1.11606	3.77e-05	-1.05394	7.93e-05	0.00749914	0.0334126	10.1867	10.6007	10.1397	9.79243	10.2141	9.37449	9.5866	0	1.00545	-0.114302	-0.95758	0.0664346	-1.97264	-1.45749	-1.71507
AT5G02760	down	-4.91605	0.00416174	-5.27838	0.00123587	0.000260012	0.000138302	2.48649	2.84765	3.88302	1.67478	1.54052	0.236996	0.212858	0	0.273608	1.05798	-0.614937	-0.716649	-1.70417	-1.72246	-1.71331
AT5G39150	down	-4.54857	0.018261	-5.01043	0.00713627	7.12117e-05	7.12117e-05	0.967212	1.28568	0.68408	0.454914	1.44417	0	0	0	0.563146	-0.50066	-0.905892	0.843406	-1.71031	-1.71031	-1.71031
AT1G78170	down	-3.47779	0.00276952	-3.29506	0.00118897	0.000440192	0.000664384	2.88156	2.50172	4.55042	2.63374	1.84035	0.451933	0.54895	0	-0.272716	1.19821	-0.177928	-0.747569	-1.74443	-1.67477	-1.7096
AT5G25590	down	-2.861	0.00513635	-1.63809	0.0430263	0.00123076	0.00877865	1.99988	2.16846	2.58805	1.55194	1.69108	0.581675	1.22095	0	0.262006	0.914142	-0.696206	-0.479942	-2.20421	-1.21064	-1.70742
AT3G16380	down	-3.31868	0.0307805	-5.65443	0.000386124	0.00566837	3.43653e-05	1.57313	1.65683	2.54409	1.17116	0.920451	0.236996	0	0	0.0978817	1.13555	-0.470111	-0.763323	-1.56263	-1.8398	-1.70122
AT3G01960	down	-2.20446	0.0260811	-2.65731	0.00497315	5.38171e-05	0.00224284	2.10164	2.37229	2.87799	1.75597	1.40031	0.869793	0.704172	0	0.349144	1.0015	-0.445919	-0.904725	-1.5891	-1.80276	-1.69593
AT5G24420	down	-2.62328	0.00174997	-1.90664	0.0117662	0.000960463	0.0010219	3.97517	3.17616	4.20145	2.82189	5.70119	1.07211	1.6631	0	-0.518662	0.146882	-0.748628	1.12041	-1.88446	-1.50083	-1.69265
AT5G59360	down	-5.2666	0.0010996	-4.76667	0.0028216	0.00049665	0.00127487	1.35571	1.64832	2.13677	0.889891	0.747845	0	0.118111	0	0.381444	1.01817	-0.607225	-0.792391	-1.76726	-1.61329	-1.69027
AT4G00480	down	-4.10316	0.0241142	-3.60322	0.0452906	0.000112165	0.000147186	1.21166	0.916935	2.05403	0.785634	1.09005	0.0710561	0.0838966	0	-0.438705	1.25387	-0.634148	-0.18102	-1.69781	-1.67869	-1.68825
AT1G67750	down	-4.88644	0.00409469	-5.29701	0.00117613	0.000552921	0.000511609	2.42818	2.71304	3.86759	1.66843	1.46367	0.2624	0.244914	0	0.221035	1.11689	-0.58952	-0.748403	-1.68052	-1.69408	-1.6873
AT4G22130	down	-2.28542	0.00169863	-2.98253	4.15e-05	0.00126686	0.00206483	2.4842	2.76575	3.40966	1.56408	2.1973	1.07368	0.752807	0	0.302243	0.993467	-0.987734	-0.307977	-1.51416	-1.85862	-1.68639
AT3G17640	down	-3.49089	0.00071454	-4.56049	2.01e-05	0.000710422	0.00112866	2.47068	3.53201	2.78372	2.01421	1.55281	0.941178	0.509448	0	1.0252	0.302379	-0.440943	-0.886641	-1.47745	-1.89449	-1.68597
AT3G14940	down	-1.78337	0.0270534	-1.91817	0.00873568	0.00115857	0.0436491	1.90417	2.15678	2.46558	1.35315	1.64119	0.939845	0.906417	0	0.43368	0.963842	-0.94602	-0.451502	-1.6556	-1.71299	-1.6843
AT3G45890	down	-1.82619	0.00151263	-2.16933	7.67e-05	0.000197861	0.00755088	3.249	3.54967	4.11522	2.69314	2.63799	1.92019	1.78235	0	0.362066	1.04313	-0.669393	-0.735798	-1.6002	-1.7662	-1.6832
AT5G08390	down	-1.43396	0.0051107	-1.57248	0.000822013	0.000146693	0.0302598	2.80548	3.02565	3.46191	2.34615	2.38819	1.80299	1.7248	0	0.354527	1.05701	-0.739617	-0.671919	-1.61423	-1.74014	-1.67719
AT4G13577	down	-2.09115	0.0111971	-3.52126	2.17e-05	0.00538091	0.000401555	2.96314	3.88197	2.86732	2.64551	2.45776	1.99465	1.11495	0	1.09286	-0.113967	-0.377792	-0.601101	-1.15193	-2.19825	-1.67509
AT2G25810	down	-3.7458	0.0423555	-4.20765	0.017875	0.000381861	0.000381861	0.541178	0.832521	0.236417	0.374185	0.721588	0	0	0	0.90004	-0.94149	-0.515886	0.557337	-1.67185	-1.67185	-1.67185
AT4G30500	down	-1.47883	0.0165701	-1.66054	0.00372715	0.0264681	0.0402283	2.45614	2.91908	2.68875	1.967	2.24975	1.64091	1.62769	0	0.941391	0.473019	-0.994697	-0.419713	-1.6578	-1.68469	-1.67125
AT5G51530	down	-3.05227	0.0414988	-4.40212	0.0052407	0.00700381	0.000129677	0.95883	1.52461	0.599792	0.735587	0.975334	0.25919	0.0838966	0	1.1968	-0.75948	-0.472231	0.0349111	-1.47996	-1.85076	-1.66536
ATCG00340	down	-1.51109	0.00418886	-1.1702	0.0270623	0.0160014	0.00843562	10.6376	11.0435	11.0766	10.2211	10.2093	9.35349	9.89423	0	0.665656	0.719863	-0.683095	-0.702425	-2.10597	-1.21915	-1.66256
AT3G54720	down	-3.56806	0.00305208	-2.0566	0.0157017	0.000830275	0.00168862	1.93844	2.23958	2.66428	1.41403	1.43587	0.36429	0.991758	0	0.396548	0.9558	-0.690558	-0.66179	-2.07288	-1.24661	-1.65974
AT5G61410	down	-1.09701	3.87e-09	-1.62288	1.36e-19	0.000121297	0.00368648	9.02664	9.34102	9.65963	8.54449	8.56142	8.12055	7.74271	0	0.475891	0.958167	-0.729843	-0.704216	-1.37158	-1.94352	-1.65755
AT5G27780	down	-4.56735	0.00272541	-5.02921	0.000680028	7.37221e-05	4.25824e-05	1.07119	1.29809	1.70367	0.814094	0.46889	0.0710561	0.0437756	0	0.370445	1.0326	-0.419732	-0.983314	-1.63282	-1.67736	-1.65509
AT5G64120	down	-1.74256	0.0386049	-6.62299	8.27e-10	0.000845695	9.89471e-10	4.26363	4.97984	4.25421	4.09578	3.72469	3.31324	0.423557	0	0.493131	-0.00648569	-0.115571	-0.371075	-0.654371	-2.644	-1.64919
AT2G45400	down	-3.61517	0.0299843	-2.6219	0.0431304	0.00097035	0.0020818	1.45168	1.19624	2.1632	1.78321	0.664097	0.132952	0.328811	0	-0.344024	0.958238	0.446479	-1.06069	-1.77602	-1.51224	-1.64413
AT1G64980	down	-1.02723	0.00717471	-1.52517	2.47e-05	0.00474924	3.45108e-05	6.15761	6.37409	6.85871	5.83829	5.55936	5.23968	4.90417	0	0.327211	1.05972	-0.482666	-0.90427	-1.38747	-1.8946	-1.64103
AT5G61340	down	-1.2312	0.0403608	-2.21036	0.000127072	0.0139319	0.0182964	3.19414	3.80487	3.17978	2.82245	2.96946	2.60121	1.89573	0	1.057	-0.0248583	-0.643288	-0.388853	-1.0262	-2.24719	-1.63669
AT2G04032	down	-2.16625	0.0499718	-2.12143	0.0304998	0.00354765	0.0112815	2.32403	1.81764	3.79678	1.68555	1.99615	0.553823	0.525755	0	-0.462728	1.34577	-0.583436	-0.299607	-1.61758	-1.64323	-1.6304
AT3G45680	down	-4.51841	0.00378196	-4.98027	0.000999988	0.00504447	0.00172242	1.02481	1.70975	1.11261	0.574427	0.70248	0.132952	0.0838966	0	1.21572	0.155824	-0.799417	-0.572129	-1.58301	-1.67008	-1.62655
AT5G14090	down	-3.58713	0.0406282	-4.04899	0.0163001	0.000613992	0.00473636	0.512109	0.784382	0.696803	0.256109	0.311143	0	0.067569	0	0.923524	0.626465	-0.86833	-0.681659	-1.73703	-1.50784	-1.62243
AT1G49380	down	-2.8058	7.41e-11	-1.28427	0.000372397	0.0191858	0.00135772	4.32207	4.69286	4.94151	4.11246	3.54145	1.96668	3.52293	0	0.380335	0.635398	-0.215012	-0.800721	-2.41606	-0.819726	-1.61789
AT4G25420	down	-4.80719	0.00638401	-5.26905	0.00204916	0.0013786	0.000742678	1.43349	2.02489	2.06391	0.509654	1.13549	0.132952	0.0838966	0	0.72146	0.769071	-1.127	-0.363533	-1.58654	-1.64639	-1.61647
AT5G66960	down	-3.51894	0.0412127	-3.98079	0.0163738	0.00117716	0.00117716	0.589996	0.741442	0.970361	0.445394	0.202787	0	0	0	0.414085	1.04	-0.395371	-1.05871	-1.61317	-1.61317	-1.61317
AT1G28290	down	-3.46074	0.0271949	-3.84836	0.0098952	0.00106469	0.000868369	1.9316	2.15126	3.10584	1.33216	1.13713	0.364767	0.345163	0	0.224737	1.20136	-0.613287	-0.812814	-1.60302	-1.62308	-1.61305
AT1G26945	down	-3.38375	0.00208494	-3.30326	0.000993864	0.00197592	0.0291092	2.16352	2.83212	2.96672	1.46448	1.39074	0.682414	0.672443	0	0.723602	0.869264	-0.756531	-0.836335	-1.60292	-1.61372	-1.60832
AT5G18300	down	-3.46517	0.0298552	-3.11758	0.0254455	0.0136456	0.0293557	0.754278	1.18349	0.892917	0.410832	0.529874	0.132952	0.155308	0	1.12821	0.364425	-0.902775	-0.589863	-1.6332	-1.57444	-1.60382
AT1G45130	down	-3.58946	0.00539751	-2.32817	0.0179336	8.34014e-05	0.019742	1.85639	2.2986	2.59391	1.29201	1.24104	0.392143	0.872617	0	0.574921	0.958858	-0.733757	-0.800022	-1.90368	-1.27901	-1.59135
AT1G62590	down	-2.4729	0.00503998	-1.98731	0.00354956	0.0219392	0.000381079	1.86986	2.05066	2.75804	1.19471	1.47602	0.518328	0.831596	0	0.240703	1.18245	-0.898836	-0.524314	-1.79931	-1.38225	-1.59078
AT1G26230	down	-3.40565	0.000210309	-1.18998	0.0205164	0.000326323	0.0453744	2.33806	2.50454	3.13515	1.65547	2.05707	0.581794	1.56148	0	0.208477	0.998151	-0.854764	-0.351864	-2.19926	-0.972461	-1.58586
AT5G54530	down	-1.92599	0.043612	-2.08367	0.0155758	0.0233539	0.0417253	1.74823	1.6936	2.71003	1.28697	1.30232	0.654236	0.631863	0	-0.0776709	1.3674	-0.655773	-0.633952	-1.55534	-1.58715	-1.57125
AT5G39180	down	-3.98935	0.0496987	-4.45121	0.0228056	0.000204551	0.000204551	0.806521	0.97199	0.40772	0.422615	1.42376	0	0	0	0.322239	-0.776634	-0.747626	1.20202	-1.57064	-1.57064	-1.57064
AT1G65230	down	-1.89034	4.53e-06	-1.70808	1.63e-05	0.000228621	0.000699079	4.93229	5.51704	5.58734	4.41087	4.21392	3.58577	3.87569	0	0.762794	0.85449	-0.680185	-0.937099	-1.7565	-1.37831	-1.5674
AT3G17350	down	-2.61154	0.0143265	-2.37829	0.010139	0.000383112	0.0472478	1.83227	2.10068	2.63924	1.71836	0.870809	0.596106	0.634696	0	0.344807	1.03666	-0.146336	-1.23513	-1.58802	-1.53845	-1.56323
AT1G04200	down	-1.20568	0.0057869	-1.01199	0.0135339	0.00855163	0.00283012	3.61441	3.92833	4.03679	3.43658	3.05595	2.71016	3.01807	0	0.645631	0.868702	-0.365749	-1.14858	-1.85976	-1.2265	-1.54313
AT5G20270	down	-1.76578	0.00187031	-1.23723	0.0264799	0.0061149	0.0185028	4.66458	4.85699	5.4615	4.62745	3.71236	3.08701	3.76971	0	0.240175	0.994751	-0.046341	-1.18859	-1.96917	-1.117	-1.54308
AT5G19290	down	-1.67664	0.00164286	-1.26081	0.014837	0.000226806	0.0196754	4.44639	4.69087	5.30555	3.95272	3.83643	3.05442	3.57272	0	0.331719	1.16574	-0.669839	-0.827621	-1.88869	-1.18544	-1.53706
AT5G57710	down	-1.4476	0.000762542	-1.1494	0.00644058	0.00229771	0.0463325	5.08716	5.63031	4.53298	5.17608	5.00926	4.0949	4.54128	0	1.08473	-1.10676	0.17759	-0.155565	-1.98164	-1.09018	-1.53591
AT5G13650	down	-1.80101	7.55e-10	-1.59787	2.71e-08	2.03635e-05	0.0026114	7.43648	8.03302	8.06832	6.90269	6.74189	6.12217	6.47377	0	0.802846	0.850362	-0.718398	-0.93481	-1.76885	-1.29565	-1.53225
AT2G26020	down	-8.39227	5.89e-05	-8.85412	1.5e-05	0.00419291	0.00419291	2.05281	2.97769	3.37553	1.1322	0.725812	0	0	0	0.688347	0.984433	-0.685164	-0.987616	-1.5278	-1.5278	-1.5278
AT3G46490	down	-4.97558	0.00896474	-6.39923	0.000436392	0.00229549	0.0012642	1.80428	1.88366	3.33545	1.22787	0.770129	0.129743	0	0	0.0696463	1.34336	-0.505709	-0.9073	-1.46914	-1.58297	-1.52605
AT1G67910	down	-1.27359	0.00305187	-2.60199	1.61e-08	0.028595	0.032708	3.07169	3.6033	3.08931	3.47092	2.12325	2.37438	1.38236	0	0.674	0.0223351	0.506159	-1.20249	-0.884089	-2.14184	-1.51296
AT4G21745	down	-3.85801	0.0216993	-3.35808	0.0436375	0.000625487	0.00198265	0.851469	0.875434	1.37221	1.04065	0.117581	0	0.0838966	0	0.0447155	0.971642	0.35298	-1.36934	-1.58873	-1.43219	-1.51046
AT3G45160	down	-3.42999	8.51e-05	-3.05806	8.72e-05	0.00143449	0.0280848	2.60096	3.28662	3.62672	2.0149	1.4756	0.939845	1.19566	0	0.669177	1.0011	-0.571975	-1.0983	-1.62118	-1.37151	-1.49635
AT4G19820	down	-3.79955	0.0239479	-4.26141	0.0086031	0.00346505	0.00346505	0.875222	0.793994	1.72331	0.61523	0.368356	0	0	0	-0.138234	1.44328	-0.442458	-0.86259	-1.48946	-1.48946	-1.48946
AT4G37750	down	-4.73691	0.00458319	-3.31831	0.0273521	0.000376905	0.00281723	1.28671	1.35978	2.36095	0.624323	0.801787	0	0.244914	0	0.0934185	1.37345	-0.84688	-0.619988	-1.64509	-1.33196	-1.48853
AT2G40530	down	-2.60229	0.00112496	-3.69285	1.87e-05	0.00344638	0.000207597	2.03449	2.71139	2.8016	1.65407	0.970907	0.941392	0.557134	0	0.773169	0.876213	-0.434527	-1.21485	-1.24857	-1.68748	-1.46802
AT5G44420	down	-6.9929	0.00055005	-7.45076	0.000156535	0.00694943	0.00557336	2.01868	3.36353	2.67136	1.54012	0.499693	0.25919	0.202008	0	1.09591	0.531865	-0.389971	-1.2378	-1.43378	-1.48038	-1.45708
AT1G56720	down	-3.94142	0.00770237	-5.29725	0.000763749	0.0141558	0.001116	1.31637	2.08769	1.66416	1.32007	0.193562	0.231338	0.126803	0	0.98133	0.442491	0.00471058	-1.42853	-1.38047	-1.51347	-1.44697
ATCG00570	down	-1.40682	0.00341047	-1.89922	3.5e-05	0.010985	0.0199893	5.43859	6.12648	5.99713	5.01586	4.61491	4.60988	4.24413	0	0.961097	0.780367	-0.590634	-1.15083	-1.15787	-1.66888	-1.41337
AT3G16060	down	-1.58602	4.73e-06	-1.52682	2.77e-06	0.00269607	0.00159187	4.30726	4.80098	5.08542	3.54119	3.80143	3.20049	3.40619	0	0.691697	1.09019	-1.07324	-0.708643	-1.55055	-1.26237	-1.40646
AT5G58550	down	-3.68399	0.0167324	-2.28094	0.0269168	0.00130709	0.0135316	1.11399	1.30656	1.84432	0.381507	0.923558	0.129743	0.454553	0	0.325776	1.2355	-1.23913	-0.322148	-1.66503	-1.11556	-1.3903
AT3G25210	down	-1.1873	0.00971798	-1.11322	0.00780399	0.00346022	0.00395665	2.98693	3.2917	3.55531	2.32692	2.77379	2.17254	2.36747	0	0.589941	1.10023	-1.27758	-0.412585	-1.57642	-1.1991	-1.38776
ATCG00560	down	-1.90886	4.5e-05	-2.79148	6.4e-10	0.0293235	0.00573935	6.08638	7.13244	6.88919	5.33047	4.99344	5.07581	4.34903	0	1.02199	0.784345	-0.73853	-1.06781	-0.987335	-1.6974	-1.34237
AT3G62930	down	-4.10492	0.00013463	-4.23845	2.06e-05	0.00415391	0.0131437	1.92457	3.42249	2.17989	1.46318	0.632745	0.581675	0.54895	0	1.42233	0.24243	-0.438115	-1.22664	-1.27514	-1.30621	-1.29067
AT5G58390	down	-5.10113	0.0163771	-5.56299	0.00683154	0.0106903	0.0106903	0.890069	1.37883	1.73717	0.189286	0.254999	0	0	0	0.702155	1.21695	-1.00676	-0.912352	-1.27869	-1.27869	-1.27869
AT4G10910	down	-4.36142	0.01032	-4.82328	0.00336578	0.00938717	0.00938717	0.473131	1.09651	0.422824	0.170405	0.202787	0	0	0	1.65202	-0.13332	-0.802256	-0.71644	-1.25384	-1.25384	-1.25384
AT3G18217	down	-4.86736	0.0061799	-5.32922	0.00198984	0.00201127	0.00201127	1.06004	1.47482	2.24129	0.205178	0.31886	0	0	0	0.487376	1.38799	-1.00447	-0.870893	-1.24556	-1.24556	-1.24556
AT2G15128	down	-2.94861	0.0151527	-3.60604	0.0025953	0.00916707	0.0302833	1.55422	2.36839	2.5806	0.768886	0.498982	0.596106	0.321898	0	0.884526	1.11508	-0.853188	-1.14641	-1.0409	-1.3388	-1.18985
AT5G44430	down	-7.19321	0.00563892	-6.69327	0.00891255	0.0207407	0.0396561	1.06101	2.34489	1.46074	0.4384	0	0	0.118111	0	1.45573	0.453235	-0.705942	-1.20302	-1.20302	-1.0691	-1.13606
ATCG00710	down	-1.72489	0.00894956	-2.32381	0.000244442	0.0287135	0.0100049	3.81774	4.34728	5.673	2.4461	2.80457	2.64597	2.20449	0	0.425037	1.48912	-1.10094	-0.813218	-0.940523	-1.29488	-1.1177

## Sheet: gProfiler-KEGG
Up-regulated
source	term_name	term_id	adjusted_p_value	negative_log10_of_adjusted_p_value	term_size	query_size	intersection_size	effective_domain_size	intersections
KEGG	Fatty acid degradation	KEGG:00071	0.000306811	3.51313	47	34	5	5300	AT1G44170,AT5G65110,AT3G06810,AT2G33150,AT1G77120
KEGG	alpha-Linolenic acid metabolism	KEGG:00592	0.00442437	2.35415	43	34	4	5300	AT5G65110,AT4G19860,AT2G33150,AT1G77120
Down-regulated
source	term_name	term_id	adjusted_p_value	negative_log10_of_adjusted_p_value	term_size	query_size	intersection_size	effective_domain_size	intersections
KEGG	Photosynthesis	KEGG:00195	9.15115e-15	14.0385	45	164	18	5300	AT1G31330,AT1G08380,AT4G12800,AT1G76100,AT1G55670,AT1G30380,AT4G28750,AT4G05180,AT1G06680,AT4G21280,AT1G20340,AT1G03130,AT5G64040,AT1G52230,AT3G01440,AT4G03280,AT5G66190,AT1G14150
KEGG	Photosynthesis - antenna proteins	KEGG:00196	2.39664e-13	12.6204	22	164	13	5300	AT1G29920,AT5G01530,AT1G15820,AT4G10340,AT3G54890,AT3G61470,AT5G54270,AT1G19150,AT2G05070,AT3G08940,AT3G47470,AT1G61520,AT3G27690
KEGG	Metabolic pathways	KEGG:01100	0.000311198	3.50696	2337	164	100	5300	AT4G33220,AT1G29920,AT5G38420,AT1G31330,AT1G08380,AT4G12800,AT4G26530,AT5G01530,AT5G19220,AT3G53190,AT1G15820,AT1G76100,AT4G10340,AT4G26520,AT2G29310,AT5G18660,AT5G45930,AT1G55670,AT1G30380,AT3G54890,AT3G61470,AT4G28750,AT1G70410,AT3G23820,AT1G43670,AT5G50375,AT4G05180,AT5G26220,AT1G25230,AT1G06680,AT4G21280,AT1G22430,AT1G20340,AT1G32470,AT2G29290,AT5G54270,AT1G22170,AT3G01500,AT5G66005,AT4G39330…
KEGG	Glycolysis / Gluconeogenesis	KEGG:00010	0.0430372	1.36616	119	164	11	5300	AT4G26530,AT4G26520,AT1G43670,AT1G22430,AT1G22170,AT3G16950,AT1G50460,AT3G12780,AT5G51820,AT4G36250,AT2G37790
