# Supplementary material for: Nuclear coat protein drives a multifaceted tolerance program during Turnip crinkle virus infection
Source: Research Square preprint supplement (doi:10.21203/rs.3.rs-8695072/v1), 2026-02-12
Supplement: Supplementary file 7 [file a38829fd09ed741048446065.xlsx]

## Sheet: Supplementary Table 4
symbol	ensembl_ID	User_ID	atg5Mock-Col0Mock_log2FC	atg5Mock-Col0Mock_adjPval	atg5NES-Col0NES_log2FC	atg5NES-Col0NES_adjPval	atg5TCV-Col0TCV_log2FC	atg5TCV-Col0TCV_adjPval	rbohDFMock-Col0Mock_log2FC	rbohDFMock-Col0Mock_adjPval	rbohDFNES-Col0NES_log2FC	rbohDFNES-Col0NES_adjPval	rbohDFTCV-Col0TCV_log2FC	rbohDFTCV-Col0TCV_adjPval	rbohDMock-Col0Mock_log2FC	rbohDMock-Col0Mock_adjPval	rbohDNES-Col0NES_log2FC	rbohDNES-Col0NES_adjPval	rbohDTCV-Col0TCV_log2FC	rbohDTCV-Col0TCV_adjPval	rbohFMock-Col0Mock_log2FC	rbohFMock-Col0Mock_adjPval	rbohFNES-Col0NES_log2FC	rbohFNES-Col0NES_adjPval	rbohFTCV-Col0TCV_log2FC	rbohFTCV-Col0TCV_adjPval	sid2Mock-Col0Mock_log2FC	sid2Mock-Col0Mock_adjPval	sid2NES-Col0NES_log2FC	sid2NES-Col0NES_adjPval	sid2TCV-Col0TCV_log2FC	sid2TCV-Col0TCV_adjPval
ATCG00950	ATCG00950	ATCG00950	5.15763	3.21e-14	4.30872	7.24e-10	4.04985	2.41e-09	4.71589	4.73e-12	5.02937	2.56e-14	5.05945	1.26e-14	4.73547	1.01e-12	4.50104	1.39e-10	4.0795	2.79e-08	4.82582	6.28e-13	4.15152	4.17e-09	3.92286	6.61e-08	-0.138732	0.976337	-0.277184	0.867092	0.393718	0.807514
ATCG01180	ATCG01180	ATCG01180	5.15784	3.21e-14	4.30876	7.24e-10	4.05038	2.41e-09	4.71608	4.73e-12	5.02942	2.56e-14	5.05997	1.26e-14	4.73566	1.01e-12	4.50108	1.39e-10	4.08002	2.79e-08	4.82597	6.28e-13	4.15152	4.17e-09	3.92338	6.61e-08	-0.138532	0.976337	-0.277239	0.867092	0.394181	0.80741
RBCS1A	AT1G67090	AT1G67090	0.195138	0.867432	-0.762551	0.187502	-2.11852	1.06e-06	-1.13235	0.0208389	-0.267635	0.635807	-2.57944	8.83e-10	0.192373	0.835403	-0.250761	0.816025	-0.355756	0.7105	-0.177359	0.820034	-0.617228	0.323977	-0.398729	0.645145	0.337726	0.830358	-0.0654919	0.959367	-0.0626824	0.962743
CAB1	AT1G29930	AT1G29930	0.48611	0.585659	-0.824764	0.177924	-3.06552	1.23e-11	-1.30976	0.0108768	-1.26814	0.00856364	-3.73209	1.86e-17	0.119213	0.92646	-0.141369	0.920026	-0.544824	0.54277	-0.16898	0.84149	-0.724253	0.263019	-0.400579	0.667659	0.130838	0.964496	0.152146	0.899566	-0.369998	0.71362
RBCS3B	AT5G38410	AT5G38410	0.0663047	0.979881	-0.870595	0.224001	-2.784	1.22e-07	-1.23301	0.0429324	0.491744	0.447234	-3.43312	1.6e-11	0.409847	0.659913	-0.253402	0.854481	-0.183918	0.900119	0.0805045	0.951669	-0.433623	0.626183	-0.311309	0.796545	0.611326	0.697201	0.148536	0.916288	0.0130052	0.994865
CAB2	AT1G29920	AT1G29920	-0.0520662	0.983218	-1.15537	0.0587522	-3.40362	1.18e-12	-0.777034	0.200996	-0.932607	0.0833215	-3.53437	4.84e-14	0.120175	0.931578	-0.0867878	0.957533	-0.470614	0.64724	-0.252114	0.761865	-0.464387	0.555994	-0.442327	0.651792	0.264268	0.898378	0.386681	0.709323	-0.00177179	0.999706
RCA	AT2G39730	AT2G39730	-0.168338	0.891776	-1.02749	0.0626798	-1.59743	0.000396619	-0.375351	0.547857	0.305753	0.587976	-2.03461	2.81e-06	-0.274138	0.742651	-0.669595	0.345971	-0.723378	0.33137	-0.648771	0.243604	-0.902503	0.113	-0.566896	0.463744	0.156665	0.947428	-0.121842	0.917265	-0.248882	0.811249
RBCS1B	AT5G38430	AT5G38430	0.114285	0.949438	-1.09733	0.106424	-2.84479	6.48e-08	-1.6192	0.00544799	-0.115851	0.884858	-3.60155	1.43e-12	0.187916	0.881088	-0.428301	0.705211	-0.360955	0.772321	-0.124846	0.907743	-0.711765	0.357239	-0.569972	0.565222	0.597455	0.708133	-0.0267454	0.986549	-0.183266	0.897275
LHB1B2	AT2G34420	AT2G34420	-0.172736	0.817929	-0.421105	0.324718	-1.36721	7.24e-06	0.311793	0.449008	1.2758	2.57e-05	-1.72265	5.12e-09	0.462019	0.263774	0.11546	0.891796	-0.292807	0.645136	-0.0638283	0.921069	-0.131988	0.830518	-0.451646	0.372013	0.269704	0.792643	0.309209	0.605415	-0.158105	0.829308
LHCB5	AT4G10340	AT4G10340	-0.195371	0.852996	-0.629141	0.256423	-2.94288	8.43e-14	-0.933383	0.0446787	0.020728	0.980332	-4.11303	2.72e-27	0.177961	0.836125	-0.228262	0.820257	-0.459543	0.559162	-0.226262	0.732884	-0.463616	0.450613	-0.487272	0.502351	0.171242	0.92854	0.37442	0.64616	-0.13277	0.901724
CAB3	AT1G29910	AT1G29910	0.137158	0.925733	-0.589321	0.409435	-2.66964	4.38e-08	-0.385509	0.587537	0.399093	0.515894	-3.00265	2.56e-10	0.855461	0.180135	0.331235	0.770062	-0.318043	0.787983	0.680641	0.279215	0.00874173	0.998511	-0.28734	0.798445	0.538649	0.720832	0.312605	0.770672	0.0981668	0.944056
PSBR	AT1G79040	AT1G79040	0.260469	0.734685	-0.110588	0.861073	-0.702704	0.0622374	0.135259	0.818834	1.25234	0.000342528	-1.68502	6.37e-07	0.474572	0.33065	-0.206177	0.807747	-0.147919	0.872407	0.133628	0.830033	-0.169101	0.801849	-0.189507	0.81367	0.340598	0.761325	0.0823678	0.928897	0.00667491	0.996034
LHCB3	AT5G54270	AT5G54270	-0.489782	0.574493	-1.06114	0.0626211	-3.12314	2.2e-12	-0.939986	0.0790387	0.310441	0.595133	-3.81792	1.02e-18	0.100273	0.940609	-0.415174	0.653586	-0.868351	0.229443	-0.270832	0.711394	-0.614594	0.354778	-1.08757	0.0846453	0.229549	0.90648	0.336957	0.727948	-0.108502	0.93209
DRT112	AT1G20340	AT1G20340	0.172909	0.89979	-0.612104	0.37357	-1.72446	0.000440999	-0.56738	0.369095	0.938689	0.0732209	-2.74486	3.73e-09	0.498146	0.504798	-0.370307	0.72419	-0.226832	0.857705	0.209978	0.805048	-0.354501	0.669037	-0.403569	0.678616	0.358179	0.837749	0.0118693	0.993298	-0.067431	0.964011
psbM	ATCG00220	ATCG00220	1.28247	0.0412717	0.857923	0.17795	1.09559	0.0340555	1.19459	0.0287221	1.84035	0.000145331	-0.0212682	0.97879	1.52599	0.00368665	0.771911	0.308354	0.724056	0.392165	1.04541	0.0592509	0.401905	0.616568	0.610745	0.471105	0.261417	0.897017	0.44352	0.648263	0.406151	0.697773
RBCS2B	AT5G38420	AT5G38420	-0.470663	0.704053	-1.17165	0.113898	-3.55996	3.45e-10	-0.761152	0.303356	1.1741	0.0602572	-4.29617	6.07e-15	0.307751	0.78467	-0.740163	0.461312	-0.503604	0.68354	-0.0649432	0.97288	-0.66404	0.447308	-0.821206	0.399708	0.417995	0.845474	-0.0744479	0.964186	-0.618629	0.609929
LHCB2.1	AT2G05100	AT2G05100	-0.22853	0.854448	-0.446059	0.53769	-1.45418	0.00319733	-0.26051	0.730667	1.35315	0.00603288	-2.58189	2.35e-08	-0.122356	0.92646	-0.834852	0.245122	-0.642827	0.457242	-0.514474	0.425885	-0.831969	0.195836	-1.24414	0.0499896	-0.047453	0.992369	-0.303251	0.769589	-0.466406	0.647645
LHCA4	AT3G47470	AT3G47470	-0.546894	0.373968	-1.00379	0.0249841	-2.59515	7.22e-13	-0.629716	0.163211	0.612569	0.138372	-2.89392	2.28e-16	-0.0455597	0.97432	-0.519672	0.399014	-0.842386	0.122557	-0.529488	0.259996	-0.735669	0.126771	-1.097	0.0205455	0.188185	0.904553	0.4111	0.566139	0.00274842	0.998671
AT1G07590	AT1G07590	AT1G07590	0.0721178	0.984824	1.7663	0.0622092	3.70658	9.39e-07	1.45227	0.107378	2.29124	0.00339686	1.74203	0.0278807	0.33931	0.83182	0.1002	0.967691	0.79093	0.607491	0.245041	0.86214	0.977825	0.380929	0.683856	0.651792	-0.883768	0.694086	-0.627984	0.690818	-0.816144	0.608795
atpE	ATCG00470	ATCG00470	1.56337	0.000755804	0.900139	0.0781487	0.354881	0.475108	1.03069	0.0244891	2.12605	8.32e-08	-0.300911	0.534547	1.81369	1.14e-05	1.08268	0.0367938	0.870708	0.155475	1.40551	0.00110883	0.99131	0.0458749	0.790973	0.191681	0.3216	0.825801	-0.311467	0.717261	0.0168767	0.99145
LHCA3	AT1G61520	AT1G61520	-0.536098	0.331313	-0.883003	0.0341353	-2.17188	1.05e-10	-0.539606	0.202839	0.714007	0.0532129	-2.16957	4.62e-11	-0.0541713	0.959365	-0.663079	0.181599	-0.715713	0.172096	-0.392401	0.391782	-0.807686	0.0565617	-0.877902	0.0567846	0.21259	0.873694	0.105708	0.906011	0.0452446	0.96632
PSAG	AT1G55670	AT1G55670	0.0246945	0.994823	-0.739955	0.264338	-2.09414	1.57e-05	-0.563174	0.375774	0.892577	0.0922413	-2.97724	1.6e-10	0.430759	0.587243	-0.513264	0.575597	-0.488553	0.621258	0.224958	0.790687	-0.505976	0.501778	-0.519681	0.563551	0.297915	0.874639	-0.123388	0.923426	-0.25776	0.822549
FED A	AT1G60950	AT1G60950	0.0923073	0.959916	-0.584858	0.424722	-1.2729	0.016869	-1.32884	0.0183289	0.196901	0.777047	-1.36733	0.00807418	0.230868	0.825679	-0.41986	0.690209	-0.0958119	0.950943	-0.0393757	0.990609	-0.868653	0.202412	-0.356382	0.736955	0.384502	0.832656	-0.0470807	0.975153	0.298344	0.798975
LHCA1	AT3G54890	AT3G54890	-0.260648	0.777029	-0.728396	0.156684	-2.6233	8.23e-12	-0.436694	0.403377	1.07004	0.00879198	-2.2965	1.45e-09	0.5527	0.312513	-0.197467	0.845431	-0.363612	0.660302	0.048764	0.966701	-0.340018	0.599823	-0.442191	0.53918	0.459999	0.691113	0.222721	0.798652	0.249716	0.782302
GER1 AT1G72610	AT1G72610	AT1G72610	-0.0144531	1	-1.23378	0.155171	-2.3279	0.000587534	-4.36911	3.19e-11	-3.17792	1.12e-06	-6.02349	1.19e-21	-0.639401	0.544701	-0.445953	0.769793	-0.276678	0.875971	-0.512617	0.601756	-0.834441	0.394342	-0.710264	0.565357	-0.0171115	1	-0.396739	0.785937	-0.300616	0.855816
AT5G42530	AT5G42530	AT5G42530	0.214491	0.907902	0.617299	0.523302	0.17838	0.841181	-2.27457	0.00091877	-1.14218	0.106255	-2.76203	1.24e-05	-0.146695	0.937286	0.293448	0.862045	0.498822	0.728788	-0.746155	0.382191	0.530443	0.620113	0.374065	0.798415	-1.68099	0.168077	-1.2855	0.237424	-1.04664	0.40518
PSAL	AT4G12800	AT4G12800	-0.127652	0.914199	-0.660362	0.226914	-1.92188	1.92e-06	-0.369972	0.511096	1.07452	0.010946	-2.0093	3.66e-07	0.396078	0.537366	-0.201423	0.847933	-0.256575	0.793556	0.0829308	0.923777	-0.246279	0.738607	-0.35098	0.666402	0.17599	0.926656	0.0642605	0.956649	-0.0115347	0.993474
ECS1	AT1G31580	AT1G31580	0.180713	0.919065	0.389584	0.689246	0.239038	0.76455	-0.752526	0.332686	-0.545683	0.455947	-3.33665	8.99e-09	-0.391636	0.725665	-0.149719	0.936325	0.318399	0.835894	-0.946553	0.200443	0.00830628	0.999604	0.152522	0.926422	-1.19222	0.39661	-1.68758	0.067102	-1.21345	0.274669
PSAF	AT1G31330	AT1G31330	-0.15658	0.915736	-0.487442	0.519128	-2.29515	4.92e-06	-0.868037	0.153621	0.803583	0.152641	-2.79429	9.93e-09	0.438343	0.598131	-0.261706	0.837559	-0.205414	0.878571	0.207275	0.817287	-0.29186	0.754733	-0.397046	0.699417	0.230943	0.91774	-0.0435936	0.977393	-0.0371985	0.983636
MT2A	AT3G09390	AT3G09390	0.0976669	0.967279	0.683196	0.44804	1.91634	0.00244867	2.58733	5.12e-05	0.930556	0.177903	2.25083	0.000232046	-0.33658	0.777638	-0.451487	0.74154	0.161758	0.928407	-0.849916	0.276831	0.130993	0.924379	-0.762404	0.481	-1.05538	0.50666	-1.15268	0.277536	-1.15232	0.323931
PSBX	AT2G06520	AT2G06520	0.059161	0.973337	-0.524676	0.375132	-1.71666	3.69e-05	-0.389094	0.495662	0.741768	0.103246	-2.37696	2.74e-09	0.378405	0.573931	-0.0512079	0.969725	-0.109978	0.927766	0.0134481	1	-0.218378	0.782409	-0.220999	0.818457	0.321772	0.829618	0.221663	0.809969	0.174443	0.865612
AT2G25510	AT2G25510	AT2G25510	0.185448	0.929669	0.704144	0.493573	1.25301	0.100141	-1.71416	0.0283175	-1.31184	0.0824781	-1.97909	0.00498934	-0.452121	0.725225	-0.035104	0.98841	0.501898	0.751195	-1.02034	0.238764	0.547687	0.638954	0.296989	0.859497	-2.11783	0.0642086	-2.15163	0.0353181	-2.10179	0.054383
PSBO1	AT5G66570	AT5G66570	-0.0796132	0.943359	-0.456966	0.344705	-1.21456	0.000510124	-0.624041	0.127516	0.547715	0.15236	-2.33178	1.07e-12	0.106461	0.901756	-0.496401	0.373432	-0.496264	0.41296	-0.267994	0.596309	-0.696531	0.11373	-0.660976	0.196343	0.212947	0.872977	-0.0196659	0.985207	-0.0063558	0.996318
PSAK	AT1G30380	AT1G30380	0.0955651	0.958899	-0.469111	0.547368	-2.37158	3.36e-06	-0.768276	0.228113	0.844693	0.137219	-3.03854	7.34e-10	0.421068	0.627674	-0.356023	0.759545	-0.480816	0.653118	-0.0368279	0.993917	-0.297763	0.753667	-0.716676	0.407956	0.252369	0.90779	0.0693836	0.962541	-0.141916	0.917392
PSBW	AT2G30570	AT2G30570	0.254034	0.796369	-0.0290871	0.973245	-0.945453	0.0326789	-0.15075	0.832631	1.3439	0.00144443	-1.93473	1.77e-06	0.823663	0.106593	0.0540499	0.968	0.108523	0.929008	0.479392	0.383469	0.100562	0.91286	-0.193774	0.844273	0.232218	0.890246	-0.136712	0.898449	-0.17638	0.864872
LHCB2.2	AT2G05070	AT2G05070	-0.286682	0.832454	-0.556889	0.491376	-3.00731	2.12e-08	-0.445578	0.56465	1.08843	0.0647225	-3.80529	2.2e-13	-0.0972362	0.952147	-0.704821	0.451581	-0.796295	0.407165	-0.514622	0.501899	-0.921814	0.213348	-1.38111	0.0592189	0.0562002	0.991578	-0.094735	0.951933	-0.344006	0.782852
LHCA2	AT3G61470	AT3G61470	-0.00139361	1	-0.470922	0.363724	-1.80711	6.04e-07	-0.607827	0.170787	0.568451	0.16409	-2.3782	9.63e-12	0.279159	0.662485	-0.33847	0.642784	-0.343406	0.652633	-0.0467721	0.963848	-0.60319	0.227402	-0.383984	0.574053	0.186144	0.903988	-0.0288663	0.97833	0.0743074	0.942297
psaB	ATCG00340	ATCG00340	-0.00165989	1	-0.655722	0.364967	-1.51109	0.00418886	-0.548526	0.420533	0.698165	0.229949	-1.1702	0.0270623	0.208985	0.851486	-0.501014	0.61407	-0.776677	0.379369	0.0182428	1	-0.937445	0.164483	-0.710525	0.409207	0.318913	0.871396	-0.563838	0.564704	-0.02484	0.989531
PSAO	AT1G08380	AT1G08380	-0.0604608	0.975151	-0.402986	0.54739	-2.00367	4.94e-06	-0.193996	0.790559	1.29954	0.00406484	-2.55178	1.82e-09	0.737129	0.198884	-0.0819787	0.954793	-0.0950249	0.943977	0.39861	0.522478	0.0422242	0.970691	-0.397101	0.649705	0.338804	0.830358	-0.00405805	0.999298	-0.0630213	0.962743
FBA2	AT4G38970	AT4G38970	-0.38858	0.586291	-1.20994	0.00487603	-1.92046	1.89e-07	-0.541643	0.245801	0.191715	0.697394	-2.05114	1.23e-08	-0.169594	0.826588	-0.553801	0.356412	-0.677222	0.255974	-0.528975	0.260257	-0.766479	0.106723	-0.745026	0.174669	0.329367	0.791426	0.24292	0.762994	-0.0999471	0.920635
PSBP-1	AT1G06680	AT1G06680	0.0259945	0.991656	-0.460858	0.429094	-1.7747	9.11e-06	-0.497905	0.336654	0.858027	0.0449136	-2.70333	1.55e-12	0.458021	0.445096	-0.303631	0.7275	-0.300578	0.739091	0.0876103	0.916343	-0.380016	0.55116	-0.441204	0.549432	0.301697	0.834581	-0.0205997	0.986403	-0.000846483	0.999959
AGP15	AT5G11740	AT5G11740	0.693298	0.461501	-0.691421	0.367387	-0.141575	0.849746	-0.724815	0.290902	0.0170132	0.992006	0.966182	0.0936447	2.01643	0.000342891	1.74854	0.00658952	1.61185	0.0229493	2.17009	0.000101676	1.43975	0.0251056	1.57276	0.0223708	0.536235	0.753963	0.884009	0.359102	0.692373	0.525511
CA1	AT3G01500	AT3G01500	-0.207533	0.918388	-1.49252	0.0838511	-3.87549	9.58e-09	-1.38842	0.083404	0.315076	0.732983	-5.17931	2.38e-15	-0.0648553	0.983904	-1.47384	0.119249	-1.3097	0.224831	-0.502516	0.623333	-1.60846	0.056806	-1.54006	0.110635	0.733772	0.72761	-0.0236379	0.990164	-0.0981505	0.962743
GAPA	AT3G26650	AT3G26650	-0.00519642	1	-0.644077	0.12553	-1.7249	9.03e-08	-1.14946	0.000970775	-0.318744	0.417634	-3.0074	1.88e-22	-0.432113	0.351553	-0.961489	0.0169183	-0.847467	0.0615068	-1.12885	0.0010758	-1.37516	9.49e-05	-1.03354	0.0106063	0.144687	0.923121	-0.212055	0.764061	-0.39956	0.548894
LHCB4.1	AT5G01530	AT5G01530	0.0973876	0.925733	-0.311832	0.561014	-1.69311	1.2e-06	-0.696751	0.0908847	0.606018	0.117643	-1.9174	1.65e-08	0.420096	0.415246	-0.142164	0.8819	-0.100621	0.919201	0.144313	0.817271	-0.25962	0.666099	-0.276548	0.699389	0.30621	0.796796	0.110053	0.904572	0.121808	0.89531
LHCB6	AT1G15820	AT1G15820	0.163454	0.915355	-0.289998	0.739925	-2.5169	1.38e-06	-0.611156	0.374102	1.01954	0.073249	-3.46593	5.02e-12	0.646178	0.397031	0.0254512	0.988674	-0.198402	0.888485	0.1996	0.832172	-0.0827791	0.946281	-0.409728	0.70222	0.236127	0.920109	0.209447	0.867467	0.0872687	0.954594
PSAE-1	AT4G28750	AT4G28750	0.329521	0.696999	-0.261438	0.684872	-1.44552	0.000350725	-0.36339	0.510174	0.979965	0.0191189	-2.18122	1.53e-08	0.664787	0.200828	-0.145907	0.896107	-0.148741	0.889512	0.337855	0.556652	-0.170842	0.832126	-0.211004	0.82006	0.316847	0.824833	0.0465525	0.968241	0.0932669	0.933331
TCTP	AT3G16640	AT3G16640	0.92579	0.000404838	0.809953	0.00220502	0.698527	0.00375316	1.23316	1.92e-07	1.26351	2.27e-08	-0.409062	0.101332	0.57326	0.0339881	0.639611	0.0290728	0.519334	0.130297	0.393077	0.163279	0.353229	0.279083	0.353335	0.354192	-0.0031568	1	0.329076	0.438877	0.28724	0.546785
PSAD-1	AT4G02770	AT4G02770	0.0437712	0.984929	-0.405144	0.586097	-1.83002	0.000165083	-0.189023	0.816826	1.30859	0.00861791	-1.92682	4.92e-05	0.620654	0.366329	-0.0566294	0.971713	-0.22718	0.856799	0.449193	0.506646	-0.0567481	0.961768	-0.303151	0.775483	0.226147	0.914062	-0.159552	0.897224	-0.198195	0.869021
PIP2A	AT3G53420	AT3G53420	0.137602	0.928273	0.250923	0.773064	1.09347	0.0449326	-0.0318419	0.989121	1.15258	0.0321867	-0.987796	0.065897	-0.1674	0.892354	-0.16176	0.91467	-0.481814	0.648172	0.405246	0.585983	0.121488	0.914515	-0.484815	0.621505	-0.238925	0.914062	-0.222044	0.851771	-0.948574	0.323931
AT2G10940	AT2G10940	AT2G10940	-0.166965	0.973337	-0.907561	0.621676	-5.02418	2.07e-05	-3.89311	0.00203493	-1.58204	0.238378	-5.7649	5.28e-07	-0.787552	0.715543	-0.834217	0.753218	-0.946467	0.712869	-0.795464	0.656049	-1.21065	0.507556	-0.686734	0.796419	0.167342	0.984395	-0.0976708	0.977819	0.295376	0.926663
LHB1B1	AT2G34430	AT2G34430	0.129787	0.952689	-0.720889	0.42971	-3.94548	1.46e-10	-2.67527	4.05e-05	-2.5622	4.02e-05	-5.12596	7.66e-18	0.574545	0.571876	-1.11872	0.232148	-0.708777	0.559804	0.137077	0.916471	-1.54078	0.0433227	-0.97009	0.341916	0.458617	0.841984	-0.476323	0.718582	-0.428104	0.761824
TIP2	AT3G26520	AT3G26520	0.253686	0.841469	-0.0525633	0.957472	0.227741	0.726615	-1.91377	0.000283551	-1.25321	0.0168749	-3.17539	3.62e-11	0.656003	0.357102	0.206156	0.879358	-0.0779283	0.96021	1.0323	0.0740068	0.58071	0.439832	0.139377	0.918829	0.289686	0.884903	0.224972	0.846493	-0.115474	0.934776
rpl32	ATCG01020	ATCG01020	1.39103	0.00209382	0.952811	0.0451842	0.51397	0.251432	0.472774	0.348455	1.04517	0.00957749	-0.208459	0.664631	1.26289	0.00257934	0.746538	0.183698	0.587425	0.386309	0.82488	0.0646165	0.580605	0.287597	0.374399	0.61762	0.311835	0.822822	0.973479	0.114367	0.403058	0.622546
LP1	AT2G38540	AT2G38540	-0.324113	0.852497	-1.03566	0.259098	-2.20968	0.00134169	0.224532	0.846661	1.61173	0.0229649	-0.919806	0.214861	0.00682984	1	0.242452	0.897399	-0.381487	0.819073	-0.0554915	0.987972	0.0381536	0.985294	-0.472451	0.738774	-0.0400115	0.999509	0.569069	0.680459	-0.112052	0.954592
ndhC	ATCG00440	ATCG00440	0.249914	0.86546	-0.514307	0.537876	-0.994451	0.10122	0.201934	0.830803	1.36929	0.0177974	-1.86108	0.000755175	0.55344	0.520259	-0.0174577	0.992968	-0.289674	0.837154	0.475923	0.547886	-0.0744534	0.955707	-0.145433	0.924251	-0.0406559	0.997056	-0.63911	0.542279	-0.444714	0.709863
DELTA-TIP	AT3G16240	AT3G16240	0.976742	0.367503	0.0285358	0.98477	-0.895689	0.236654	-3.56726	9.64e-08	-1.77349	0.00964448	-4.91062	6.26e-15	0.0143576	1	-0.3466	0.834635	-0.196362	0.916234	-0.089099	0.959882	-0.649447	0.531604	-0.497669	0.7143	0.219063	0.952632	-0.0642759	0.973201	-0.258415	0.877807
AT2G45180	AT2G45180	AT2G45180	0.668644	0.538301	-0.541165	0.545526	-2.77495	2.21e-06	-1.30405	0.0542949	0.202447	0.80723	-4.53778	5.64e-16	0.301374	0.796129	0.141805	0.939388	0.30228	0.841265	0.128881	0.916295	-0.0582819	0.969697	-0.183944	0.905947	0.453309	0.830358	0.209235	0.888136	0.130645	0.937227
APE2	AT5G46110	AT5G46110	-0.395746	0.638134	-0.611227	0.289714	-1.42191	0.000875376	-0.822448	0.0945603	0.143511	0.807671	-2.65389	3.53e-11	-0.303351	0.685909	-0.73404	0.242439	-0.675073	0.33753	-0.662344	0.197005	-1.05995	0.0354684	-0.944067	0.10789	0.0133091	1	-0.374792	0.657272	-0.614685	0.451855
FBA1	AT2G21330	AT2G21330	-0.167654	0.897041	-1.24115	0.0236771	-1.96697	1.7e-05	-0.275093	0.695872	0.163828	0.797342	-2.03602	5.47e-06	-0.765959	0.198184	-0.687393	0.347148	-0.900425	0.202944	-1.40713	0.00423943	-1.06438	0.0588315	-1.16558	0.0568038	0.0898967	0.976459	0.0601915	0.962824	-0.326961	0.74885
HOG1	AT4G13940	AT4G13940	0.0802166	0.954316	-0.443665	0.447128	-0.759807	0.0806004	-0.771207	0.100889	-1.84925	2.37e-06	-0.849392	0.0419339	-0.57966	0.288547	-0.0526233	0.967533	-0.175344	0.866975	-0.335019	0.56098	-0.104943	0.904121	-0.236416	0.792381	0.166378	0.929026	0.341643	0.674127	0.0550835	0.964011
PSAH2	AT1G52230	AT1G52230	0.00108651	1	-0.698663	0.266911	-2.09001	5e-06	-0.767045	0.169437	0.584076	0.270573	-3.33867	2.21e-14	0.343092	0.674156	-0.361342	0.71296	-0.443924	0.641364	0.0125391	1	-0.394396	0.602147	-0.762474	0.294074	0.382032	0.810808	0.0886606	0.945938	-0.0169375	0.991761
PSBY	AT1G67740	AT1G67740	-0.496365	0.549619	-0.924765	0.103076	-1.67516	0.000203529	-1.10404	0.027936	0.257523	0.656381	-2.59991	1.43e-09	-0.140095	0.899909	-0.804008	0.223475	-0.781273	0.279421	-0.432797	0.486405	-0.872899	0.130886	-0.923285	0.153694	0.302831	0.858513	-0.245359	0.804021	-0.177851	0.874863
CA2	AT5G14740	AT5G14740	0.20827	0.868834	-0.469175	0.502652	-3.10482	1.24e-11	-1.42784	0.00539886	-0.446168	0.432124	-5.03786	7.48e-30	-0.0539223	0.977182	-0.771054	0.287988	-0.607729	0.482753	-1.30754	0.0111084	-1.62804	0.00211841	-0.945659	0.170992	0.124522	0.966412	-0.364023	0.71389	-0.442842	0.66241
PSBTN	AT3G21055	AT3G21055	0.70215	0.37088	0.0960857	0.915014	-1.46283	0.0029834	-0.416277	0.532179	1.0517	0.0380559	-2.79694	1.2e-09	1.10106	0.0500678	0.29087	0.799687	0.284493	0.807391	0.728861	0.217324	0.234419	0.798654	0.100494	0.941714	0.418582	0.794606	0.0670425	0.961557	0.0112471	0.994952
GAPA-2	AT1G12900	AT1G12900	-0.659839	0.39468	-1.4567	0.00689854	-3.0255	2.68e-11	-2.01365	2.76e-05	-0.514621	0.346466	-3.19248	5.57e-13	-0.432766	0.561851	-1.45821	0.00918221	-1.16512	0.0738311	-0.786565	0.160614	-1.5726	0.00275775	-1.48358	0.00953508	0.362048	0.827179	-0.0956246	0.940256	-0.195662	0.865473
PSBQA	AT4G21280	AT4G21280	0.284667	0.816941	-0.32747	0.686539	-2.29334	4.47e-06	-1.11967	0.0520084	0.480858	0.426248	-3.53435	1.42e-13	0.515193	0.506624	-0.194809	0.887789	-0.353181	0.759636	0.0650234	0.962705	-0.325803	0.714573	-0.644394	0.458961	0.454266	0.784788	0.00374033	0.999866	-0.231065	0.852088
PCC1	AT3G22231	AT3G22231	0.353118	0.912267	-0.325507	0.869859	-0.72824	0.596383	-2.60744	0.0369942	-3.69517	0.000914956	-4.56451	2.54e-05	-0.0899886	0.989489	-0.0340321	0.993145	0.706778	0.787983	-0.555839	0.764773	0.35406	0.879234	0.856278	0.703302	-2.02827	0.458319	-2.48233	0.166265	-4.29421	0.00448196
PSAN	AT5G64040	AT5G64040	0.431282	0.657793	-0.0150185	0.988557	-1.54194	0.00152359	-0.753607	0.194702	0.833842	0.109763	-2.75085	1.82e-09	0.702139	0.276197	-0.406256	0.678131	-0.164005	0.899707	0.233056	0.773447	-0.508596	0.485662	-0.439879	0.636515	0.36632	0.829663	0.0887155	0.946904	0.114077	0.930474
ATCG00920	ATCG00920	ATCG00920	3.12443	0.0206499	-0.556272	0.760987	1.72938	0.150858	1.89603	0.141575	0.0836439	0.963509	4.5986	1.34e-05	2.6076	0.0373485	-0.312283	0.923415	1.33942	0.507177	3.12544	0.00757569	-0.019354	0.998447	0.962221	0.652739	-0.483096	0.920197	-3.22934	0.0446157	-0.0207254	0.99603
ATCG01210	ATCG01210	ATCG01210	3.12612	0.0205396	-0.55611	0.761028	1.73038	0.15059	1.89769	0.141006	0.08424	0.963291	4.59911	1.33e-05	2.60933	0.0371724	-0.312101	0.923415	1.34119	0.506403	3.12729	0.00752741	-0.019034	0.998511	0.963596	0.651792	-0.48441	0.920109	-3.22889	0.0446157	-0.022151	0.995786
LHCB4.2	AT3G08940	AT3G08940	-0.0245359	0.992921	0.000729763	0.999488	-2.09033	1.46e-06	-0.244903	0.721339	1.27343	0.00454336	-2.91493	2.84e-12	0.251666	0.763225	-0.2945	0.768117	-0.541295	0.508301	-0.44468	0.458987	-0.677833	0.264263	-0.9001	0.155657	0.205879	0.914062	0.0827205	0.946634	-0.0566518	0.966337
KIN2	AT5G15970	AT5G15970	0.861548	0.460052	1.73037	0.0322218	1.6603	0.018756	2.71968	9.46e-05	3.85751	2.31e-09	0.475408	0.551413	2.82072	3.51e-05	1.04134	0.32352	0.827502	0.510278	4.11858	2.87e-10	2.43157	0.00109611	2.35826	0.00318372	-0.861128	0.652425	0.436656	0.76269	0.110683	0.954679
PSBQ-2	AT4G05180	AT4G05180	0.21908	0.845616	-0.033316	0.971134	-1.58948	0.00039127	-0.223512	0.753119	1.11259	0.0158228	-2.57379	1.46e-09	0.711605	0.221492	-0.160926	0.89623	-0.0822474	0.951521	0.356364	0.580054	-0.289081	0.711597	-0.0917548	0.942694	0.257653	0.884102	0.0246793	0.985479	0.136232	0.906505
ELP	AT1G12090	AT1G12090	-1.81983	0.0227402	-1.81473	0.0158061	-4.51032	4.44e-13	-0.354142	0.722874	1.88891	0.00369743	-3.32022	7.27e-08	-0.55077	0.598225	-0.135586	0.947708	-0.207245	0.906074	0.125338	0.927295	-0.0456484	0.980229	0.239916	0.882192	0.220196	0.948403	0.693703	0.571064	0.95007	0.444294
UBQ3	AT5G03240	AT5G03240	0.336337	0.752726	0.723181	0.260018	0.538285	0.329505	1.69037	0.000756692	-1.87518	6.31e-05	1.26349	0.00865227	-0.624963	0.351845	0.687205	0.366579	0.211837	0.862304	0.107994	0.910648	0.315893	0.703572	0.637107	0.426906	-0.525641	0.709654	0.551842	0.536956	-0.114528	0.929269
PSI-P	AT2G46820	AT2G46820	-0.0540715	0.98212	-0.690536	0.306643	-1.73777	0.000452207	-0.41431	0.543699	1.1187	0.0298155	-2.19365	4.32e-06	0.442375	0.575422	-0.653941	0.423615	-0.544299	0.564669	0.0292061	1	-0.480588	0.529887	-0.66864	0.418132	0.298807	0.874639	-0.229331	0.838221	-0.398496	0.705261
PSAH-1	AT3G16140	AT3G16140	0.149514	0.904786	-0.343338	0.611382	-1.34147	0.00262521	-0.135362	0.857048	1.32945	0.00264274	-2.13365	4.03e-07	0.586201	0.334799	-0.0461477	0.973981	-0.118188	0.924826	0.327186	0.608824	-0.12692	0.891888	-0.211819	0.834422	0.328434	0.83322	-0.020733	0.986655	-0.0411673	0.976876
NPQ4	AT1G44575	AT1G44575	-0.0548334	0.977127	-0.940721	0.0677216	-1.50852	0.000330367	0.0393913	0.976532	1.48743	0.000351259	-1.20442	0.00414434	0.276657	0.716824	-0.241303	0.81094	-0.345071	0.700712	0.0803386	0.92926	-0.30207	0.671439	-0.37753	0.644357	0.475165	0.696763	0.266778	0.766389	0.0814766	0.94444
GAPB	AT1G42970	AT1G42970	-0.24037	0.806023	-1.38413	0.00296735	-2.25565	1.96e-08	-0.802753	0.0941138	-0.0473003	0.941906	-2.53038	1.03e-10	-0.313704	0.65979	-0.984515	0.0667556	-0.839976	0.178614	-0.673447	0.174241	-1.17393	0.0138835	-0.879163	0.131787	0.259591	0.866874	-0.192399	0.838035	-0.205847	0.834683
AT1G09310	AT1G09310	AT1G09310	-0.471585	0.731314	-1.86326	0.0107102	-3.29445	9.08e-08	0.526555	0.547025	1.86856	0.0034137	-2.3753	0.000119917	-0.306968	0.807022	-0.398957	0.78488	-0.825036	0.466632	-0.741429	0.36536	-0.910726	0.301051	-0.864549	0.411659	0.0195111	1	0.0951442	0.958284	0.0548553	0.9791
CRD1	AT3G56940	AT3G56940	0.201554	0.820113	-0.310241	0.574377	-1.83886	2.43e-07	-0.360353	0.459034	0.512756	0.20812	-1.90824	4.37e-08	0.0972693	0.919503	0.0544771	0.963011	-0.293678	0.707889	-0.192442	0.746625	-0.444783	0.401856	-0.46657	0.452864	0.277846	0.829663	0.35316	0.617969	-0.135615	0.882542
LHCB2.3	AT3G27690	AT3G27690	-0.486554	0.839445	-0.743794	0.61919	-4.38584	4.35e-06	-1.50613	0.199091	0.498854	0.691752	-5.18447	2.48e-08	0.0782592	0.989489	-1.48564	0.324513	-1.75846	0.247022	-0.514188	0.744417	-1.30281	0.343799	-2.29572	0.0786755	0.527043	0.892378	0.0948219	0.97273	-0.242101	0.925823
LOX2	AT3G45140	AT3G45140	-1.22616	0.150548	-0.891027	0.278715	-1.16405	0.0741262	-0.188078	0.856636	0.50401	0.49357	-2.79684	1.76e-06	2.61538	1.66e-05	1.2221	0.147239	-0.364261	0.802274	3.57503	1.14e-09	2.45678	0.000150184	1.34434	0.10907	0.0438209	0.997089	0.533074	0.658946	-0.473715	0.714053
ATCG01050	ATCG01050	ATCG01050	0.397759	0.63136	0.388888	0.535677	0.12085	0.831182	1.00808	0.0316218	1.20222	0.00478228	-1.16834	0.00562617	1.11842	0.0168748	0.981034	0.0736434	0.421129	0.616782	1.09819	0.0162613	0.562847	0.34659	0.468073	0.534949	-0.187868	0.919575	-0.667459	0.366912	-1.18493	0.0756019
THI1	AT5G54770	AT5G54770	-0.320033	0.712851	-1.09155	0.0237835	-0.795083	0.0689652	0.317385	0.581813	0.659139	0.139445	-0.849137	0.044215	-0.172844	0.84082	-0.47523	0.50986	-0.238442	0.80805	-0.353766	0.538533	-0.688095	0.20542	-0.394688	0.607112	0.195305	0.910272	-0.281985	0.740698	0.125453	0.905768
AGT	AT2G13360	AT2G13360	0.0841597	0.946683	0.0526544	0.942641	-0.32839	0.478807	0.540361	0.257172	1.6749	7.87e-06	-0.329661	0.456929	-0.275401	0.686181	-0.524407	0.406127	-0.166616	0.867435	-1.04328	0.0122976	-0.97674	0.0322594	-0.343005	0.649595	-0.178466	0.914157	-0.471571	0.506663	-0.594649	0.424026
MT2B	AT5G02380	AT5G02380	-0.208189	0.824964	0.0123631	0.988347	0.611087	0.150281	0.422275	0.401244	1.19815	0.00198406	0.164591	0.731458	-0.0983096	0.924934	-0.229538	0.802064	-0.0559835	0.961539	-0.366258	0.49027	0.018041	0.988598	-0.231781	0.783653	-0.139243	0.943458	-0.113522	0.909255	-0.315861	0.700672
AOS	AT5G42650	AT5G42650	-0.428088	0.792645	-0.454007	0.683462	-0.0411902	0.969559	0.825358	0.357032	1.02778	0.184921	-0.624477	0.435362	3.59355	1.37e-07	1.90565	0.0272401	0.354588	0.841053	3.88873	1.2e-08	3.18559	1.31e-05	2.54033	0.00173408	-0.181816	0.966488	1.2527	0.29653	0.278532	0.872671
atpB	ATCG00480	ATCG00480	-1.19762	0.0204322	-1.81443	4.97e-05	-2.4071	2.76e-09	-1.66386	0.000109879	-0.577415	0.217457	-3.02912	1.03e-14	-0.841223	0.0940825	-1.55806	0.000880294	-1.86366	6.14e-05	-1.12362	0.0129322	-1.68218	0.00017074	-1.93041	2.08e-05	0.280622	0.857298	-0.533414	0.483431	-0.250287	0.7923
ERD14	AT1G76180	AT1G76180	-0.00155404	1	1.43811	0.000851468	2.128	1.89e-08	1.90747	1.27e-06	2.44299	4.17e-11	0.782279	0.0540269	1.4229	0.000416043	0.729287	0.193287	0.371533	0.641936	0.728583	0.108398	0.489761	0.386234	0.566074	0.375126	-0.817127	0.345162	-0.267745	0.743512	-0.320402	0.70072
GRP-3	AT2G05520	AT2G05520	0.690447	0.315886	0.417465	0.521983	0.522611	0.301336	1.25939	0.00834399	1.38447	0.00174194	0.562559	0.24249	-0.784295	0.154867	-0.591455	0.414765	-0.171988	0.881882	-1.21234	0.010762	-0.344878	0.637142	-1.33804	0.0133919	-1.78508	0.00247585	-1.30865	0.0437594	-1.03869	0.172287
MT3	AT3G15353	AT3G15353	0.147459	0.923267	0.16332	0.861221	1.13868	0.0389035	0.841328	0.180386	1.17118	0.031944	-0.361383	0.556989	0.28649	0.773994	-0.170108	0.910194	0.105854	0.946705	-0.341869	0.66539	-0.264772	0.789106	-0.0884636	0.954476	-0.109152	0.974713	-0.105405	0.940876	0.247158	0.844312
PRXR1	AT4G21960	AT4G21960	-0.59083	0.544769	-0.558531	0.47245	-2.56452	9.29e-07	0.650312	0.339614	1.06765	0.0595862	-2.09865	5.41e-05	-0.718677	0.329815	-0.12591	0.939792	-0.805389	0.375915	-0.868648	0.17424	-0.525725	0.524349	-0.703398	0.434722	-0.766449	0.593832	0.24729	0.838339	0.616174	0.568205
AT5G60390	AT5G60390	AT5G60390	-0.198141	0.807343	-0.713497	0.09559	-0.947968	0.00712899	-0.481609	0.256046	-0.630879	0.0871387	-0.197765	0.632388	0.198795	0.75722	0.0393188	0.971823	-0.0622188	0.9522	0.45483	0.292997	0.0552412	0.943924	-0.155369	0.847312	0.439586	0.647595	-0.235485	0.742169	0.207196	0.789931
PIP1B	AT2G45960	AT2G45960	-0.328227	0.66547	-0.0453838	0.950319	0.726557	0.0680164	-0.915505	0.0264542	-0.202955	0.671914	-1.17282	0.00147448	-1.38308	0.000292404	-1.15032	0.00936108	-1.17744	0.011926	-1.40188	0.00024527	-1.397	0.000563943	-1.43693	0.000694529	-0.525519	0.601091	-0.341273	0.64147	-0.839507	0.200699
AT2G26500	AT2G26500	AT2G26500	0.428708	0.52022	0.00516291	0.995523	-0.856702	0.0276771	-0.491773	0.289965	0.325845	0.465123	-1.86147	1.64e-07	0.555188	0.260149	0.10017	0.92839	0.285344	0.725709	0.114833	0.866129	-0.202509	0.766451	0.115889	0.90402	0.426895	0.690904	0.404714	0.564556	0.28402	0.721035
rpoA	ATCG00740	ATCG00740	0.597562	0.281577	-0.212063	0.720841	-0.756996	0.0500043	-0.160929	0.785921	0.349078	0.417884	-1.29653	0.000281508	0.481045	0.341106	0.218509	0.799687	-0.0756333	0.945297	0.169017	0.785154	-0.230259	0.71876	-0.0357822	0.976361	0.182355	0.903988	0.0723245	0.942369	0.278006	0.72112
LTP3	AT5G59320	AT5G59320	-0.274513	0.940655	0.917199	0.610446	7.25389	9.06e-11	7.27708	6.81e-11	10.0949	2.42e-21	9.75939	1.48e-19	-0.657596	0.762764	1.41017	0.483286	4.60559	0.000598094	-0.807219	0.63599	2.4234	0.091886	2.23787	0.193796	-4.44078	0.0237135	0.714002	0.775753	1.02351	0.68578
ERD10	AT1G20450	AT1G20450	0.584283	0.603516	0.701663	0.398691	1.56222	0.00971798	2.36823	8.34e-05	3.10933	2.91e-08	0.670558	0.303279	3.77206	1.27e-11	2.06299	0.00199411	0.649125	0.561582	2.58602	1.08e-05	1.38774	0.0494377	1.13723	0.183269	-0.830794	0.60015	0.370509	0.768015	-0.139059	0.930572
rps14	ATCG00330	ATCG00330	2.33089	1.1e-05	1.58804	0.00553088	0.901056	0.0983356	1.75602	0.000880128	2.94081	7.94e-10	1.02665	0.0489196	2.51286	3.33e-07	1.66915	0.00431118	1.59695	0.0115301	2.24219	8.29e-06	1.26441	0.0337683	1.58534	0.00948894	0.413422	0.809654	-0.316738	0.768894	0.442023	0.68109
AT4G16980	AT4G16980	AT4G16980	0.585887	0.639239	-0.380678	0.709369	-1.61809	0.0132457	-3.07584	1.27e-06	-1.70619	0.00795779	-4.6706	3.26e-15	-0.321636	0.791939	-0.451133	0.74534	-0.0936562	0.96053	-0.610919	0.478966	-0.820746	0.36296	-0.950453	0.34842	0.279723	0.920064	-0.342487	0.804003	-0.237265	0.881543
HSC70-1	AT5G02500	AT5G02500	0.543941	0.26901	-0.44645	0.317671	-0.265224	0.499052	-0.102851	0.852614	0.108962	0.809414	-0.188427	0.630349	-0.584775	0.148598	-0.443828	0.402755	-0.305252	0.64724	-0.0197343	0.999274	-0.222103	0.691677	-0.179232	0.806832	-0.166781	0.901648	-0.461408	0.427288	-0.115367	0.89043
RD22	AT5G25610	AT5G25610	-0.533784	0.668176	-1.45745	0.0482117	-1.55743	0.0138667	0.863921	0.250341	2.96704	4.16e-07	0.392973	0.586781	-0.860279	0.297739	-0.286397	0.853994	-0.550775	0.663319	-0.990487	0.174241	-0.531246	0.586038	-0.748821	0.478	-1.00123	0.520441	-0.340209	0.798147	-0.554532	0.669742
ESM1	AT3G14210	AT3G14210	-0.474988	0.780866	-0.920326	0.375313	-2.6039	0.000450412	-3.7953	2.95e-07	-1.45401	0.0646444	-2.51682	0.000560391	-1.83146	0.0291475	-0.698131	0.625519	-0.997771	0.446309	-0.912252	0.33588	-0.66422	0.570957	-0.358835	0.833366	-0.324442	0.921727	0.0210546	0.991782	0.64093	0.683901
ARGAH2	AT4G08870	AT4G08870	-0.887686	0.290222	-1.22991	0.067464	-0.588097	0.355983	-0.28051	0.745148	1.26243	0.0265274	-1.59468	0.00364525	1.47701	0.014846	0.822441	0.338025	0.397423	0.745781	2.60875	1.52e-06	2.42948	2.4e-05	1.72686	0.00932211	0.0836351	0.98365	0.607909	0.554195	-0.0328989	0.986831
GGT1 AT1G23310	AT1G23310	AT1G23310	-0.258238	0.753449	-0.555203	0.263722	-1.10687	0.0032206	-0.423708	0.373434	0.696678	0.0777731	-1.80126	3.6e-07	-0.599621	0.207725	-0.859196	0.0743486	-0.708303	0.210343	-1.20167	0.00185855	-1.17697	0.00450695	-0.745168	0.159064	-0.295054	0.818945	-0.210023	0.7939	-0.311431	0.692168
ATPD	AT4G09650	AT4G09650	-0.118272	0.940001	-0.630209	0.356905	-1.77485	0.000293969	-1.17747	0.0309609	0.45407	0.436834	-2.29268	1.17e-06	0.19438	0.856123	-0.527194	0.558913	-0.402034	0.700804	0.0486552	0.978712	-0.436533	0.57635	-0.713661	0.371512	0.291352	0.878187	-0.172386	0.887133	-0.393323	0.706395
ATCG00030	ATCG00030	ATCG00030	1.05795	0.0594129	-0.0561527	0.946589	-1.16625	0.00861681	0.143144	0.84473	0.990822	0.0268651	-0.892939	0.0452906	0.987782	0.0475275	0.710356	0.272716	0.675311	0.346793	0.589629	0.272375	0.385905	0.57203	0.665122	0.331743	0.226396	0.898613	-0.0958767	0.932427	-0.248268	0.801098
AT1G13930	AT1G13930	AT1G13930	-1.00265	0.125697	-0.205019	0.800712	0.396369	0.488902	1.78301	0.000298922	3.05668	1.03e-11	1.33996	0.00490204	0.264532	0.769754	0.128493	0.928365	0.733719	0.358232	0.994199	0.0645041	0.895705	0.14382	0.90969	0.191005	0.0644149	0.984395	-0.0411596	0.976987	0.206269	0.85978
GLDP1	AT4G33010	AT4G33010	-0.569986	0.461838	-1.1688	0.0292617	-1.62941	0.000309242	0.834578	0.112375	1.79583	4.73e-05	-0.529058	0.288637	-0.327559	0.67868	-0.891323	0.157955	-0.821645	0.244927	-0.897993	0.0810277	-1.24625	0.0170961	-0.742829	0.288349	0.263099	0.881406	-0.106924	0.927707	-0.297449	0.76765
AT3G22235	AT3G22235	AT3G22235	-0.0434265	0.996502	-0.650203	0.685902	-0.656359	0.597624	-2.98334	0.00606711	-3.73349	0.000177972	-3.79983	0.00011541	-0.602226	0.747974	-0.472541	0.854481	0.186777	0.951305	-0.986655	0.47403	-0.0616658	0.983471	0.195371	0.94659	-1.69526	0.5093	-2.23961	0.167243	-3.83509	0.00502199
BGLU18	AT1G52400	AT1G52400	-0.425525	0.851669	1.56765	0.176848	-3.27449	0.000280988	2.83475	0.00278717	3.79765	1.28e-05	-0.961135	0.335107	3.52305	9.82e-05	3.0707	0.00280175	-1.02377	0.544561	6.00899	1.62e-12	5.95198	1.12e-11	2.77672	0.0104516	0.0499417	0.999808	3.18794	0.00915648	1.08137	0.546785
GS2	AT5G35630	AT5G35630	-0.174985	0.891102	-0.673993	0.286478	-1.1298	0.0199561	-0.867962	0.110069	0.489699	0.367813	-2.00509	8.58e-06	-0.0600181	0.970489	-0.588476	0.457897	-0.624613	0.449851	-0.417866	0.519589	-0.701819	0.273361	-0.828138	0.237013	0.223425	0.909797	-0.0290581	0.982872	-0.0684864	0.960323
ATMS1	AT5G17920	AT5G17920	-0.412393	0.591907	-0.690936	0.191532	-0.920946	0.0305409	-0.815162	0.080329	-0.0625507	0.918399	-1.02111	0.012948	0.0333542	0.988941	0.101561	0.934641	-0.126341	0.910708	0.13549	0.852284	0.0374839	0.970948	0.0608557	0.961012	0.508299	0.656176	0.468785	0.536654	0.352684	0.683847
DHAR1	AT1G19570	AT1G19570	-1.30826	0.102867	-0.437011	0.635647	0.298832	0.692232	1.11104	0.106517	1.93007	0.0010978	0.934381	0.137956	2.94872	3.56e-07	1.3374	0.0864168	-0.267398	0.860223	3.54245	5.37e-10	2.55959	4.15e-05	1.62997	0.0306532	-0.422731	0.844134	1.06119	0.295457	0.451859	0.721757
GRP7	AT2G21660	AT2G21660	1.4067	0.0704836	0.482307	0.586909	0.373318	0.603928	-0.216585	0.828545	-5.63456	9.33e-26	1.5712	0.00728261	0.412458	0.695043	0.172241	0.920495	0.577696	0.621738	1.37058	0.0352226	0.0547016	0.970709	0.749998	0.449138	-0.12535	0.973967	0.630077	0.567994	0.305798	0.822524
GSTU5	AT2G29450	AT2G29450	0.402779	0.644219	-0.0549375	0.948581	1.00723	0.0281512	-0.247716	0.713145	0.622055	0.202547	0.219326	0.682889	2.86834	4.54e-12	1.56539	0.0015851	-0.0242476	0.987868	1.66953	0.000196431	1.51643	0.0017178	1.31193	0.015208	-0.3978	0.778371	0.836016	0.255657	-0.0880414	0.942297
NIT1	AT3G44310	AT3G44310	-0.502271	0.3532	-0.38157	0.430337	0.793252	0.024623	-0.552905	0.171367	-0.166453	0.707002	0.0466186	0.920097	-0.463528	0.316489	-0.555463	0.275731	-0.477009	0.416748	0.224487	0.658225	-0.0367408	0.964509	-0.218882	0.761269	-0.0738682	0.972812	-0.184984	0.802847	-0.46502	0.480109
RABE1b	AT4G20360	AT4G20360	-0.0117128	0.99976	-0.658595	0.166874	-1.09007	0.00379206	-0.557683	0.214142	0.397389	0.354816	-1.42664	7.4e-05	0.0151384	1	-0.312409	0.677553	-0.366424	0.621258	-0.194226	0.747339	-0.450707	0.400947	-0.412182	0.533118	0.311318	0.80246	-0.0550337	0.958492	-0.265673	0.741946
RAB18 AT5G66400	AT5G66400	AT5G66400	-1.27848	0.425685	0.841691	0.556775	3.06528	0.00146249	4.14204	1.85e-05	5.43147	1.95e-09	7.88034	4.51e-19	-0.291572	0.901257	0.617659	0.774453	0.854652	0.668295	-0.376422	0.821425	0.399328	0.833774	1.03823	0.549579	-1.05762	0.704776	0.398932	0.85623	0.25728	0.91936
SAG21	AT4G02380	AT4G02380	0.221119	0.94776	1.83464	0.166205	2.7952	0.00808489	1.93772	0.105364	-0.0335058	0.991077	4.54351	4.47e-06	1.84419	0.150424	0.381199	0.892126	1.56477	0.367007	-1.25098	0.345749	0.799196	0.638972	0.417662	0.866858	-1.74213	0.506962	-1.0321	0.601581	-0.44903	0.858951
LOS1	AT1G56070	AT1G56070	-0.374762	0.425731	-0.770887	0.0186678	-0.784662	0.00624362	-0.680614	0.0284171	-1.37527	3.16e-07	-0.48089	0.103205	-0.310246	0.453154	-0.338327	0.48556	-0.447474	0.332923	-0.0325365	0.969701	-0.41218	0.2861	-0.480341	0.259676	0.337773	0.667564	-0.130749	0.837459	0.0232228	0.98037
PETC	AT4G03280	AT4G03280	-0.259236	0.659996	-0.657257	0.0653765	-1.37539	1.46e-06	-0.71998	0.025402	0.513996	0.101692	-1.56696	1.71e-08	-0.00936851	1	-0.560884	0.17288	-0.419679	0.405989	-0.33736	0.372155	-0.729905	0.034232	-0.506548	0.251109	0.360218	0.657698	0.0855999	0.909255	0.172859	0.794391
AT1G74470	AT1G74470	AT1G74470	-0.0812512	0.940814	-0.994968	0.0121875	-2.4833	5.45e-14	-1.154	0.00141902	-0.619555	0.093332	-2.25594	2.84e-12	-0.28844	0.607378	-0.721421	0.12163	-0.849775	0.0731637	-0.54371	0.187128	-1.12859	0.00319977	-0.843387	0.063567	0.340642	0.748668	0.332922	0.615864	-0.0370771	0.9729
CAT2 AT4G35090	AT4G35090	AT4G35090	0.10112	0.956493	-0.786161	0.269837	-0.624699	0.303411	0.3505	0.652136	0.887168	0.122678	-0.881523	0.115299	-0.943621	0.152496	-1.20857	0.0813768	-1.09767	0.163578	-1.3732	0.016808	-1.50004	0.0136944	-1.11445	0.135035	-0.121956	0.970179	-0.514208	0.615358	-0.603338	0.57148
ATPC1	AT4G04640	AT4G04640	-0.465818	0.479924	-1.0196	0.0221523	-1.67028	6.89e-06	-0.585758	0.199593	0.526168	0.212259	-1.88896	1.78e-07	-0.123567	0.891374	-0.752062	0.152744	-0.590116	0.348934	-0.297701	0.58469	-0.779599	0.0984981	-0.785238	0.142292	0.249033	0.859486	-0.119693	0.901378	-0.265372	0.749234
GAPC2	AT1G13440	AT1G13440	-0.300145	0.567211	-0.312226	0.442953	-0.185844	0.593082	0.204597	0.614735	0.393397	0.212558	-0.227872	0.485806	-0.0856879	0.902556	-0.388613	0.396685	-0.25169	0.668295	-0.475314	0.15641	-0.684682	0.042377	-0.712247	0.0555663	0.0144119	1	-0.333281	0.525259	-0.169777	0.791375
VSP2	AT5G24770	AT5G24770	-2.008	0.107626	0.291834	0.860402	-1.51641	0.134062	3.69795	7.33e-05	7.23521	1.8e-17	-0.366372	0.749502	4.27631	1.83e-06	4.04884	4.21e-05	1.2436	0.439149	5.63194	1.2e-10	5.79606	1.68e-10	3.56247	0.000563919	2.60189	0.093809	5.05545	1.09e-06	2.22849	0.149318
TGG1	AT5G26000	AT5G26000	0.255312	0.90884	-0.25426	0.854935	-2.67329	0.00069728	-2.30456	0.00638809	-0.84435	0.354926	-2.89028	0.000167535	0.472851	0.745122	0.355321	0.859881	-0.307754	0.881494	0.329127	0.80923	0.391868	0.791663	0.0605855	0.981967	0.642554	0.810748	0.836897	0.574974	0.538444	0.755815
PDE334	AT4G32260	AT4G32260	0.584551	0.231676	0.0196609	0.977368	-0.416285	0.269552	0.182125	0.722145	1.14735	0.00046605	-1.06762	0.00110681	0.595515	0.147494	0.212288	0.779086	0.215881	0.778744	0.27834	0.55223	0.0601373	0.935078	0.209733	0.76879	0.270403	0.810808	0.0137093	0.987675	-0.201556	0.788017
UBQ10	AT4G05320	AT4G05320	-0.0699781	0.964676	-0.0259677	0.976347	-0.0667268	0.909764	0.188681	0.780767	0.225	0.677111	-0.209478	0.682924	-0.81529	0.108867	-1.0991	0.0360607	-0.956858	0.108741	-0.773272	0.112257	-0.0572874	0.954137	-0.319118	0.705165	-0.729754	0.488944	-0.967879	0.149684	-0.746232	0.343071
SSR16	AT4G34620	AT4G34620	0.273246	0.699869	-0.162626	0.775136	-1.32327	7.76e-05	-0.782307	0.0388732	-0.228078	0.589379	-2.61326	1.16e-16	0.249892	0.67076	0.139839	0.877066	-0.0917934	0.924049	-0.177497	0.747581	-0.365906	0.471051	-0.286593	0.667528	0.401822	0.672182	0.386084	0.541601	0.304972	0.671339
CLH1	AT1G19670	AT1G19670	-0.63247	0.658767	-0.118165	0.929786	-1.32452	0.0856586	-0.324822	0.775457	1.63527	0.0263911	-1.2586	0.0934144	3.15716	7.1e-06	2.69441	0.000627722	0.443162	0.79228	3.18873	6.34e-06	3.81661	1.17e-07	3.22	2.77e-05	0.0353201	1	1.68639	0.133032	0.529832	0.72917
GOX1	AT3G14420	AT3G14420	-0.00346718	1	-0.604112	0.296688	-1.04268	0.0186149	-0.0146977	1	0.770891	0.0921072	-0.994906	0.021956	-0.484235	0.436971	-0.70386	0.270642	-0.69967	0.31204	-1.23392	0.00663271	-1.00487	0.0497273	-0.610874	0.380421	0.00305896	1	-0.184452	0.850269	-0.294618	0.753782
psbA	ATCG00020	ATCG00020	0.270045	0.899719	-0.0318639	0.985228	1.47896	0.0710722	1.41139	0.113852	1.59921	0.0469705	-0.255647	0.793354	0.214728	0.913009	-0.281455	0.893385	0.353959	0.857665	0.18044	0.904835	-0.90531	0.419402	-0.378297	0.82944	-0.244519	0.9547	-0.707363	0.63849	-1.07211	0.468124
VTC2	AT4G26850	AT4G26850	0.925185	0.158629	0.300189	0.685684	0.576747	0.278052	-0.06571	0.95201	0.41714	0.4543	-0.232814	0.683124	-1.37953	0.0061135	-0.987038	0.117848	-0.631025	0.443569	-0.593375	0.316242	-0.763068	0.222895	-0.0317145	0.98448	-0.551264	0.675787	-0.663369	0.425256	-0.840067	0.335944
GAMMA-TIP	AT2G36830	AT2G36830	-0.757232	0.420977	-0.800774	0.294161	1.23135	0.0368434	-2.32571	4.96e-05	-1.19528	0.0422431	-2.47033	5.02e-06	-0.30047	0.778599	0.0839601	0.962884	-0.695748	0.50024	0.352419	0.680324	0.488949	0.585615	-0.468349	0.673233	-0.224288	0.932895	0.505863	0.647812	-0.225477	0.870584
CSD2	AT2G28190	AT2G28190	-0.333662	0.875426	-0.830454	0.476784	-1.56903	0.0670753	-2.82025	0.000785903	-1.75153	0.0366348	-2.18359	0.00669066	-0.769024	0.537366	-1.04416	0.434688	-1.36106	0.290184	-1.10101	0.270433	-1.35486	0.203372	-1.12127	0.397569	-0.0132648	1	-0.578757	0.728276	-0.228273	0.913316
AT5G27850	AT5G27850	AT5G27850	-0.257232	0.837644	-0.579903	0.424053	-1.42096	0.00632999	-0.90846	0.127565	-2.35789	1.54e-06	-1.02341	0.05183	-0.182627	0.874201	-0.332593	0.771509	-0.170423	0.90097	0.135736	0.88803	-0.380123	0.655076	-0.327153	0.763017	0.559547	0.708133	-0.279054	0.801975	0.213975	0.863896
AT1G32920	AT1G32920	AT1G32920	1.67375	0.218831	0.962558	0.476249	2.45307	0.0102621	1.68909	0.119397	1.79635	0.0692248	1.79411	0.0632259	3.23223	0.000806518	1.28643	0.391244	3.04709	0.00782068	1.7575	0.100586	3.0083	0.00372519	2.10869	0.0959509	0.0838154	0.993469	-0.348437	0.875913	1.20864	0.510743
PSBO2	AT3G50820	AT3G50820	-0.405599	0.573122	-0.346308	0.548866	-0.667497	0.11162	-0.593896	0.203518	0.825833	0.0409778	-1.60272	1.82e-05	0.14333	0.868088	-0.882851	0.0806434	-0.554602	0.407013	-0.237054	0.688923	-0.892247	0.0561237	-0.810005	0.136931	0.401028	0.732679	-0.266134	0.740698	-0.13824	0.888292
AT2G23120	AT2G23120	AT2G23120	1.64979	0.00553073	0.900099	0.168484	1.50307	0.00348585	1.91506	0.000257251	2.23477	5.24e-06	0.0959767	0.888843	3.84503	5.42e-16	2.66421	3.45e-07	1.18504	0.0976626	2.68537	6.2e-08	2.34296	8.87e-06	1.23455	0.06603	-0.0979736	0.976531	0.62116	0.50455	0.0561431	0.972395
AT4G01150	AT4G01150	AT4G01150	0.077419	0.951606	-0.559494	0.269921	-1.75688	1.91e-06	-0.474196	0.318236	0.668798	0.0991192	-2.24887	2.87e-10	0.456357	0.396269	-0.070743	0.954345	-0.296252	0.716428	0.17734	0.780947	-0.336031	0.574124	-0.07646	0.943449	0.444004	0.677611	0.267367	0.731635	0.30105	0.706832
AT4G23670	AT4G23670	AT4G23670	0.141687	0.916297	0.117521	0.889504	-0.257332	0.662182	1.68341	0.000526961	3.27681	7.26e-14	1.77204	9.4e-05	0.896417	0.113928	0.1618	0.900262	-0.384966	0.698258	0.337124	0.621114	0.247077	0.775391	-0.677473	0.373166	0.384998	0.808346	0.929552	0.226653	0.149625	0.901771
COR15A	AT2G42540	AT2G42540	-0.0944376	0.978194	-0.610713	0.592273	0.905152	0.286041	2.6082	0.000709958	4.07467	6.63e-09	1.35927	0.0790971	3.44376	2.06e-06	0.517655	0.753311	0.115708	0.959429	5.28903	3.37e-14	2.63853	0.00111642	1.99941	0.034716	-0.205918	0.964413	0.813025	0.559785	1.42624	0.294443
emb2386	AT1G02780	AT1G02780	-0.280707	0.696913	-0.498272	0.286116	-0.879301	0.0138367	-0.365701	0.41952	-0.890584	0.0115846	-0.42004	0.26684	-0.144949	0.841617	-0.0793566	0.941729	-0.231999	0.769091	-0.00901837	1	-0.176625	0.785207	-0.310193	0.642816	0.403759	0.682736	-0.0346151	0.972152	0.233083	0.75937
AT5G02960	AT5G02960	AT5G02960	0.115227	0.925819	-0.252923	0.711239	-0.618414	0.188533	-0.434845	0.436073	-1.17379	0.00619995	-0.476428	0.310207	0.206959	0.804795	0.202673	0.850662	0.150045	0.894673	0.381416	0.516496	0.0893675	0.923321	-0.0319433	0.982453	0.500631	0.675495	0.0984579	0.928897	0.25609	0.789122
TIFY7	AT1G70700	AT1G70700	-0.58464	0.601287	-0.663844	0.428034	-0.192802	0.804171	0.0723317	0.961829	0.81352	0.212706	-1.33928	0.0253275	3.30741	3.99e-09	1.99893	0.00290599	0.201418	0.898722	2.13052	0.000396473	2.23891	0.000394387	1.54531	0.0401593	-0.333235	0.884903	1.09312	0.268331	-0.234647	0.870925
PRK	AT1G32060	AT1G32060	0.216434	0.848669	-0.455442	0.486523	-1.66285	0.000200496	-0.231616	0.742937	0.99036	0.0344578	-2.12216	8.45e-07	-0.160685	0.874523	-0.680868	0.330397	-0.337841	0.733059	-0.836674	0.107003	-0.948699	0.0878775	-0.673938	0.349614	0.0853311	0.976662	-0.310968	0.73916	-0.357497	0.708732
eEF-1Bb1	AT1G30230	AT1G30230	0.623059	0.274832	-0.130956	0.84327	-0.971625	0.0123819	-0.0815071	0.908905	-1.53553	2.85e-05	-1.44318	8e-05	-0.244423	0.721282	0.0565361	0.962658	0.0506947	0.964773	-0.0933459	0.898484	-0.162235	0.826784	0.0734868	0.94598	-0.00890361	1	0.127442	0.892513	0.3446	0.666067
PCR1	AT1G14880	AT1G14880	0.709883	0.849669	0.402682	0.878859	-0.576258	0.764992	-4.3971	0.00633656	-7.90322	3.2e-08	-7.42969	1.66e-07	-1.76141	0.409392	-0.288134	0.951941	-0.114669	0.980697	-2.07165	0.259321	0.188485	0.95751	-0.31181	0.940424	-4.03687	0.132204	-5.91055	0.00262566	-8.60202	9.92e-08
GSTF9	AT2G30860	AT2G30860	-0.430658	0.57303	0.374406	0.53878	-0.377566	0.437016	1.30824	0.00255832	1.16906	0.00469341	1.24861	0.00207629	1.00798	0.0299181	0.639634	0.309742	0.204939	0.842784	1.80518	1e-05	1.24756	0.00696217	1.16699	0.023056	-0.152353	0.93963	0.411027	0.599723	0.345122	0.691502
TGG2	AT5G25980	AT5G25980	-0.0954904	0.984555	-0.613109	0.699045	-3.37249	0.000732808	-2.31779	0.0359841	-0.845023	0.478352	-3.52777	0.000297277	0.38218	0.861489	0.13455	0.965856	-0.603768	0.796777	0.329617	0.852663	0.33334	0.869959	0.107824	0.973424	0.804812	0.811976	1.38547	0.433432	1.36475	0.478556
CAT3 AT1G20620	AT1G20620	AT1G20620	-0.27009	0.786977	0.861935	0.11253	0.212159	0.699922	0.677669	0.19345	0.327165	0.537521	0.622265	0.181395	0.319337	0.671037	0.0241725	0.986474	0.279988	0.780644	0.457765	0.425885	0.0640292	0.94944	0.236744	0.808326	-0.455888	0.726444	-0.848232	0.237483	-0.158176	0.884884
AT4G39200	AT4G39200	AT4G39200	0.768539	0.208813	0.364718	0.562519	-0.0578812	0.922295	-0.193716	0.773499	-0.76137	0.0908595	-0.323398	0.506268	0.586874	0.3023	0.606652	0.360671	0.736977	0.265354	0.523746	0.327643	0.496654	0.417219	0.589469	0.393868	0.404006	0.760903	0.101077	0.926137	0.284558	0.758548
GUN5	AT5G13630	AT5G13630	-0.0186392	0.996105	-0.968157	0.0496962	-2.15762	5.62e-08	-1.34524	0.00179443	-0.720273	0.101425	-3.05124	1.54e-15	-0.306993	0.662153	-0.425907	0.573691	-0.790776	0.203242	-1.00098	0.0251797	-1.05748	0.0273796	-0.777988	0.192532	0.294923	0.840334	0.281284	0.740698	-0.0727512	0.949163
BGL2	AT3G57260	AT3G57260	-0.12809	0.982582	-0.474178	0.817045	-0.638009	0.671338	0.23805	0.919138	-4.96202	1.94e-05	-1.98341	0.114361	-0.283813	0.932086	-0.731432	0.79213	-0.510713	0.867907	-0.58312	0.769519	1.25129	0.486964	-0.834595	0.733035	-2.76304	0.264786	-5.07555	0.0009991	-3.74563	0.038365
MIPS1	AT4G39800	AT4G39800	-0.0981755	0.971803	-0.463904	0.665817	-0.853086	0.272145	0.944324	0.261773	2.45861	0.000253155	0.097832	0.916603	-1.01012	0.264593	-0.365334	0.826349	-1.00018	0.393552	-1.66062	0.0262236	-1.18177	0.18838	-0.538601	0.693458	-0.661273	0.758077	-0.19657	0.91125	-0.0773538	0.971058
AOC2	AT3G25770	AT3G25770	-2.0648	0.020312	-1.32317	0.153483	-1.6257	0.0310616	1.18517	0.16428	1.88852	0.00972829	-0.742257	0.355382	4.27594	3.66e-10	2.91613	0.000198279	0.524189	0.740924	4.30665	3.78e-10	3.64846	6.38e-07	2.47451	0.00319964	-0.102388	0.984395	2.03902	0.0541752	0.160586	0.934776
AT3G09200	AT3G09200	AT3G09200	-0.385553	0.691217	-0.954341	0.100918	-1.45622	0.00198373	-0.919131	0.0865325	-1.70384	0.000205288	-0.749098	0.129473	-0.256509	0.7719	-0.51191	0.545225	-0.333704	0.749647	-0.00077678	1	-0.41326	0.577031	-0.555066	0.495477	0.375904	0.81514	-0.274005	0.784957	0.0600589	0.96632
PSAD-2	AT1G03130	AT1G03130	-0.346717	0.746965	-0.543287	0.437867	-2.08108	1.56e-05	-0.43926	0.507841	1.28557	0.00982264	-2.26016	1.5e-06	0.333767	0.702439	-0.253414	0.834028	-0.526865	0.576109	0.0341936	0.994244	-0.368114	0.651277	-0.898305	0.21383	0.373185	0.82824	0.0406881	0.977717	-0.0764695	0.956923
psbZ	ATCG00300	ATCG00300	1.44502	0.0374954	1.29982	0.0497222	0.202205	0.778258	1.57815	0.00758723	3.14519	1.55e-09	0.412963	0.517932	2.01615	0.000331922	1.66958	0.0104282	1.26201	0.105458	1.39967	0.0187469	0.557778	0.505979	1.18513	0.121554	-0.287979	0.898381	-0.601066	0.561685	-0.216713	0.873903
emb2171	AT3G04400	AT3G04400	0.358814	0.577609	0.152456	0.793568	-0.458422	0.237354	0.0881589	0.885916	-0.290962	0.48261	-0.534992	0.143976	0.532935	0.236354	0.508993	0.345779	0.225124	0.777171	0.521725	0.211418	0.335086	0.528136	0.0944057	0.918576	0.457736	0.626876	0.193542	0.795631	0.128014	0.882145
AT5G15200	AT5G15200	AT5G15200	-0.0178431	0.995687	0.0314665	0.966943	-0.425701	0.325563	-0.5318	0.250489	-1.03431	0.00664744	-0.596724	0.134712	0.243687	0.721282	0.255494	0.759877	0.116035	0.911135	0.427668	0.382191	0.110068	0.889864	-0.101474	0.920268	0.52274	0.607786	0.21418	0.79195	0.345921	0.664289
FD1	AT1G10960	AT1G10960	0.141653	0.908791	-0.480645	0.443278	-0.79377	0.0909981	-0.791056	0.120076	0.0733023	0.910187	-2.06756	7.53e-07	-0.548525	0.371497	-0.505631	0.510586	-0.531687	0.50829	-1.12373	0.0175757	-0.698328	0.234921	-0.624161	0.38108	0.266375	0.872731	0.0395599	0.975386	0.225277	0.825307
SHM1	AT4G37930	AT4G37930	-0.346831	0.608354	-0.812779	0.0583297	-1.72855	5.84e-07	-0.223464	0.668953	1.06834	0.00255681	-1.58011	3.47e-06	0.113518	0.893478	-0.40345	0.519621	-0.265717	0.733059	-0.152164	0.802506	-0.524257	0.280147	-0.262924	0.712687	0.342692	0.757143	0.0610934	0.951199	0.0882711	0.92579
AAC1	AT3G08580	AT3G08580	-0.0981825	0.894019	-0.54098	0.107964	-0.233067	0.46795	-0.918881	0.00111207	-0.696065	0.011187	-0.0851347	0.803749	0.400237	0.260678	-0.0901171	0.905587	-0.107568	0.878441	0.502669	0.104757	0.192152	0.671916	-0.0985915	0.883885	0.0229883	0.994926	-0.198376	0.720996	-0.102001	0.879991
OPR3	AT2G06050	AT2G06050	-0.463533	0.803357	0.195823	0.89191	0.583753	0.545131	0.247185	0.854348	1.25777	0.145152	-0.162319	0.879314	5.88267	1.45e-15	4.83635	7.94e-10	1.73331	0.128555	3.85419	7.21e-07	3.76489	4.27e-06	2.95269	0.00109274	-0.869295	0.708866	3.13757	0.00262566	0.744273	0.655177
AT1G51400	AT1G51400	AT1G51400	0.0632299	0.98042	0.0804605	0.936972	-1.76231	0.00122261	-0.241375	0.782782	1.7013	0.00164889	-2.81135	5.43e-08	0.497882	0.558431	-0.236625	0.866449	-0.598383	0.560573	-0.115409	0.916676	-0.25665	0.803794	-1.01111	0.203049	0.31205	0.882789	0.244373	0.842503	-0.0719508	0.964676
AT5G20290	AT5G20290	AT5G20290	-0.00178502	1	-0.152372	0.829506	-0.841194	0.0495991	-0.740358	0.116399	-0.891951	0.0344578	-0.844734	0.0426791	0.136103	0.886637	0.317885	0.70621	0.15151	0.887099	0.279098	0.640979	0.168205	0.83507	-0.0109304	0.993026	0.498576	0.657858	0.102457	0.922115	0.401288	0.632072
ROC4	AT3G62030	AT3G62030	-0.100398	0.960085	-0.896298	0.22917	-2.23111	6.18e-05	-1.50356	0.0143129	0.160469	0.84078	-2.73541	3.98e-07	0.0353438	0.997647	-0.683069	0.482444	-0.794297	0.416552	-0.326184	0.711434	-0.564226	0.514515	-0.898186	0.306779	0.441012	0.823777	0.140732	0.923426	-0.235071	0.864872
FAD2	AT3G12120	AT3G12120	0.319928	0.730567	-0.319008	0.630426	-1.26026	0.00400254	0.645641	0.214669	0.449288	0.368064	0.0350335	0.954256	-0.121835	0.911272	0.753602	0.228396	0.0535994	0.967337	-0.0979794	0.90859	0.296652	0.68545	0.388556	0.639604	0.0278938	0.998159	1.09843	0.095982	0.734646	0.363918
petA	ATCG00540	ATCG00540	1.50972	0.00366737	1.41011	0.00551768	0.39209	0.463636	1.37914	0.00380719	2.53611	2.43e-09	-0.0432164	0.946339	1.82615	4.9e-05	1.56547	0.00209264	0.995639	0.121865	1.42085	0.00242875	1.0973	0.0390305	0.951008	0.130522	-0.183258	0.929026	-0.693546	0.380471	-0.611115	0.483947
RP1 AT1G43170	AT1G43170	AT1G43170	-0.385308	0.61429	-0.696016	0.172508	-1.54347	8.19e-05	-0.998219	0.0218118	-1.2696	0.00130385	-0.864493	0.0328825	-0.120382	0.901756	-0.00578406	0.998463	-0.225437	0.814	0.184646	0.783367	-0.0518221	0.956213	-0.21962	0.80562	0.559755	0.598936	0.0277234	0.980013	0.345273	0.682432
AT3G11630	AT3G11630	AT3G11630	0.0690126	0.978549	-0.867618	0.227419	-2.17447	5.33e-05	-1.17854	0.0550128	0.47383	0.467136	-2.45447	2.82e-06	0.165687	0.90154	-0.474863	0.662338	-0.658573	0.511815	-0.14734	0.88598	-0.530132	0.527801	-0.902459	0.281728	0.421092	0.82567	0.0373983	0.980495	-0.118275	0.937242
AT5G27700	AT5G27700	AT5G27700	0.617619	0.26277	0.743354	0.104513	0.379257	0.373094	-0.0263581	0.985159	-1.38602	0.000115382	-0.464017	0.245621	0.451678	0.385132	0.554804	0.329913	0.534402	0.395886	0.488192	0.28836	0.328555	0.569919	0.23967	0.757314	0.437275	0.671193	0.510738	0.435229	0.309634	0.690573
MT1A	AT1G07600	AT1G07600	-0.663372	0.689487	1.09992	0.312172	3.01863	0.000128429	0.749477	0.484432	1.62479	0.0530427	1.06124	0.218823	-0.385132	0.807642	-0.500666	0.785917	0.176001	0.940995	-0.332645	0.809939	0.342781	0.827531	0.00646916	0.998438	-0.961214	0.667564	-0.710101	0.652602	-0.919016	0.566383
APX1	AT1G07890	AT1G07890	-0.461642	0.551045	-0.562694	0.334507	-0.296261	0.567613	0.140986	0.84411	0.135155	0.81863	0.554043	0.228009	0.130915	0.899722	-0.149697	0.897513	-0.150456	0.894169	0.323165	0.597812	0.211724	0.790898	0.138739	0.898103	-0.129263	0.959233	-0.222688	0.80946	-0.103463	0.927209
SAMDC	AT3G02470	AT3G02470	0.274873	0.389049	0.261404	0.330014	0.937893	7.93e-07	-0.844271	2.06e-05	-0.0245655	0.935054	0.253829	0.231901	-0.627797	0.00231415	-0.56262	0.0172061	-0.342288	0.267385	-0.726818	0.000277339	-0.613541	0.00508082	-0.488378	0.0578231	-0.0837161	0.925468	-0.423476	0.177812	-0.614529	0.038807
AT1G07920	AT1G07920	AT1G07920	0.316395	0.587535	-0.249679	0.597278	-0.374835	0.290257	0.31282	0.44423	-0.731359	0.0222256	0.0291021	0.947799	0.41401	0.332345	0.307928	0.598203	0.0872685	0.919044	0.65222	0.0611368	0.361005	0.425823	0.275015	0.647778	0.43769	0.599756	-0.474979	0.384036	-0.0781219	0.924451
CP12-1	AT2G47400	AT2G47400	0.0647153	0.923267	0.0262841	0.953722	-0.0488588	0.877769	-0.430566	0.109373	-0.186824	0.506354	-0.596728	0.0104654	0.230106	0.514502	-0.350269	0.330532	-0.0390631	0.955941	-0.0500994	0.915469	-0.559616	0.0422852	-0.226991	0.59894	0.245883	0.722253	-0.0398368	0.951644	-0.16447	0.745363
AT3G28220	AT3G28220	AT3G28220	0.0501306	0.994114	-0.0287001	0.989288	-0.145958	0.917063	0.407541	0.797709	1.80956	0.0834239	0.042315	0.978938	2.17138	0.0549301	1.4684	0.336218	0.89821	0.656886	4.73523	8.03e-07	5.00692	4.99e-07	5.70234	1.2e-08	0.720622	0.834581	2.52381	0.0943778	1.89902	0.291428
AT1G67865	AT1G67865	AT1G67865	0.51489	0.734714	0.991627	0.296767	2.31099	0.000995225	1.39516	0.0823924	2.01601	0.00432853	-1.48905	0.0387401	1.16758	0.190265	0.399121	0.812644	0.665759	0.640233	0.865713	0.333173	1.05582	0.270757	0.0700122	0.975676	-0.510974	0.836963	-0.294123	0.855567	-0.758226	0.594221
SAHH2	AT3G23810	AT3G23810	-0.819242	0.614982	-1.15058	0.32008	-2.78363	0.00107126	-1.35957	0.17784	0.354542	0.753495	-2.07815	0.0151061	-0.353937	0.841617	-0.128118	0.962497	-0.774621	0.654623	0.800299	0.489151	0.795656	0.543712	0.843505	0.59033	0.31848	0.938792	0.876275	0.584193	0.606409	0.741244
AT1G23130	AT1G23130	AT1G23130	0.610303	0.636527	0.760787	0.411987	1.96395	0.00301465	0.965047	0.22622	1.73988	0.00893969	0.821144	0.249251	0.572484	0.585253	0.188436	0.922554	0.289493	0.861939	0.365971	0.724474	0.508222	0.63808	0.27999	0.856176	-0.362027	0.888387	-0.842	0.475842	-1.17588	0.335944
PRP4	AT4G38770	AT4G38770	-0.0744509	0.984844	-1.3576	0.210991	-4.04943	5.86e-07	-0.873159	0.420533	0.366484	0.737872	-4.83361	8.72e-10	0.00553604	1	0.0635431	0.981667	-0.682891	0.696495	-0.042258	1	-0.532223	0.71149	-0.368031	0.849248	0.140559	0.980064	0.199868	0.925952	0.185383	0.934776
ACP4	AT4G25050	AT4G25050	0.298142	0.784502	-0.464171	0.503936	-1.66023	0.00048284	-2.15814	6.71e-06	-0.625872	0.240664	-2.32048	3.49e-07	0.216553	0.821869	-0.423815	0.651239	-0.183024	0.883463	-0.193265	0.815212	-0.550033	0.430286	-0.697024	0.364631	0.371444	0.823824	0.10543	0.932422	-0.0131175	0.993538
ATMG00020	ATMG00020	ATMG00020	0.556053	0.456753	0.815289	0.142325	0.791839	0.0918811	-0.101051	0.900121	0.0920325	0.886187	1.21454	0.00535235	0.631473	0.280001	0.436191	0.595796	-0.0450381	0.972515	0.169529	0.825129	0.520295	0.413449	0.353428	0.68405	0.222808	0.902136	-0.38156	0.65975	0.273203	0.78127
HA1	AT2G18960	AT2G18960	-0.123958	0.864484	-0.493152	0.162581	-1.11606	3.77e-05	-0.331069	0.345593	-1.25028	2.53e-06	-1.05394	7.93e-05	-0.739525	0.015439	-0.189891	0.755053	-0.745888	0.0410324	-0.639121	0.0356436	-0.448317	0.224268	-0.390924	0.385259	-0.375157	0.617622	0.101976	0.877488	-0.569207	0.248854
AT2G41090	AT2G41090	AT2G41090	0.0250749	0.998405	-0.046223	0.974215	0.273686	0.759492	-3.29736	1.86e-06	-2.08798	0.00252333	-2.50089	0.000200765	-0.45743	0.711922	-0.104777	0.962497	0.513491	0.734686	-1.25327	0.116982	0.215417	0.880102	0.119695	0.952612	-1.39594	0.366661	-1.18186	0.319224	-0.927002	0.489425
ERD15	AT2G41430	AT2G41430	0.341314	0.764494	0.777751	0.248162	0.289956	0.646174	0.602046	0.349371	1.40372	0.00606105	0.243635	0.694192	3.01741	3.6e-10	2.0426	0.000222316	0.978082	0.202297	0.321274	0.674945	0.917771	0.161473	0.615887	0.480456	-0.240617	0.91047	0.835345	0.341515	0.421397	0.693723
GSTF2	AT4G02520	AT4G02520	-0.750844	0.625646	0.33007	0.805519	-0.0597757	0.95941	-3.72468	2.73e-06	-5.85887	2.24e-15	-3.20466	2.58e-05	-2.15508	0.0129807	-1.47165	0.189737	-0.537732	0.763893	-3.28716	3.55e-05	-1.47753	0.144142	-2.15636	0.0314733	-2.71729	0.0201979	-3.41432	0.00068634	-1.29841	0.382449
SBPASE	AT3G55800	AT3G55800	0.36937	0.684115	-0.502352	0.421117	-1.39901	0.00158367	-0.0272883	0.988931	1.09103	0.0152098	-1.40541	0.00117775	0.417052	0.539823	-0.403846	0.636892	-0.137932	0.908781	0.00985668	1	-0.499747	0.43943	-0.323896	0.715603	0.281486	0.861753	-0.198836	0.842045	-0.0512155	0.970103
PIP3	AT4G35100	AT4G35100	0.520598	0.606547	0.670216	0.362406	-1.07695	0.0554714	-1.73941	0.00178542	0.130687	0.863984	-1.87737	0.000299935	-0.540469	0.498655	0.171448	0.909998	0.205393	0.881948	-0.245467	0.784487	-0.170069	0.8763	0.0448519	0.979789	0.043375	0.995251	0.215283	0.860008	0.13187	0.925823
psaJ	ATCG00630	ATCG00630	5.60596	1.29e-21	4.46462	1.11e-13	5.16647	2.8e-18	4.41126	1.45e-13	4.26876	3.04e-13	3.69583	4.54e-10	5.52561	8.66e-22	3.95165	1.86e-10	4.68499	2.68e-14	4.81983	2.2e-16	3.24623	3.15e-07	4.20435	2.1e-11	-0.761982	0.666642	-1.13755	0.291561	-0.250266	0.87659
EMB2296	AT2G18020	AT2G18020	-0.0788905	0.957397	-0.306108	0.641303	-0.680552	0.141605	-0.461538	0.399886	-1.05318	0.0149094	-0.367376	0.44582	0.228461	0.775388	0.138863	0.908918	0.119238	0.918636	0.438548	0.436549	0.201488	0.801487	-0.0173229	0.989512	0.50646	0.669038	-0.0164797	0.988147	0.0709687	0.953247
LURP1	AT2G14560	AT2G14560	0.570207	0.867251	-0.0075775	0.997829	-0.0666686	0.973169	-3.89958	0.00505764	-6.56027	1.37e-07	-2.60209	0.0521785	-1.74104	0.329449	-1.2616	0.609798	-0.564126	0.864915	-2.94886	0.0400797	-1.28505	0.519664	-0.38097	0.911517	-3.95287	0.0571378	-4.39094	0.0146039	-5.87345	0.000231258
AT2G34480	AT2G34480	AT2G34480	0.291913	0.730567	-0.0873274	0.902772	-0.400833	0.379312	-0.249044	0.66751	-0.646699	0.12814	-0.123241	0.805021	0.431198	0.455347	0.413425	0.567089	0.360071	0.653163	0.651939	0.160326	0.368097	0.545296	0.219016	0.803763	0.482788	0.657858	-0.0929231	0.927408	0.296905	0.723111
AT3G60750	AT3G60750	AT3G60750	0.0295424	0.984555	-0.504939	0.212281	-1.29841	1.91e-05	-0.166003	0.728163	0.625812	0.053596	-0.833627	0.0069818	0.197356	0.724613	-0.124373	0.879505	-0.0786056	0.929385	-0.175671	0.717118	-0.352619	0.436864	-0.188232	0.778754	0.145367	0.910779	-0.0624462	0.940213	-0.146441	0.843378
CYT1	AT2G39770	AT2G39770	0.409065	0.577609	0.129209	0.852608	-0.101651	0.849383	-0.164225	0.797864	-0.0455113	0.940717	-0.785458	0.0540563	2.05482	6.44e-08	0.806918	0.132574	0.145166	0.888485	2.54539	9.53e-12	1.66114	5.85e-05	1.37097	0.00280155	-0.0837649	0.973801	0.402852	0.589276	0.11792	0.908022
FSD1	AT4G25100	AT4G25100	4.38304	0.00804145	0.235015	0.92831	0.298249	0.875767	6.12128	1.46e-05	4.45215	0.00134204	0.0571331	0.979828	6.61301	1.31e-06	2.84517	0.136441	1.65594	0.520816	5.94575	2.1e-05	3.16941	0.0598547	0.763986	0.806832	4.23963	0.0571378	2.58229	0.272336	0.683652	0.83695
LTP5	AT3G51600	AT3G51600	-0.599566	0.533959	-1.65298	0.00661545	-3.34552	7.49e-11	-1.33619	0.0229455	-0.322759	0.632427	-3.60121	6.07e-13	-0.806566	0.251539	-0.773311	0.359504	-1.00113	0.224123	-0.671382	0.32217	-0.976479	0.157359	-1.41887	0.0380876	0.282251	0.897269	0.376713	0.732782	-0.331417	0.78263
TRX3	AT5G42980	AT5G42980	0.424472	0.631835	0.2309	0.757914	1.15713	0.0128041	1.41245	0.00315891	1.62694	0.000248859	0.896175	0.0547151	0.924717	0.084961	0.212863	0.852485	0.277664	0.794887	0.798705	0.129643	0.686646	0.264667	-0.0066349	0.996677	-0.352294	0.824833	-0.340947	0.71512	-0.576762	0.516438
AT1G66100	AT1G66100	AT1G66100	1.03998	0.608829	-0.594373	0.730492	-1.96188	0.0851744	-1.81351	0.146746	-2.2253	0.0451366	-4.45701	1.57e-05	0.95115	0.572092	-0.768272	0.738243	-1.42857	0.444798	0.837145	0.582149	0.191937	0.935175	0.0630558	0.986456	0.819973	0.825724	0.389565	0.878486	0.469117	0.855821
AT1G67430	AT1G67430	AT1G67430	0.324381	0.732435	-0.217542	0.766189	-0.625762	0.20043	-0.518897	0.35326	-1.07687	0.0168387	-0.543684	0.255644	0.414644	0.543155	0.301424	0.756226	0.277595	0.787037	0.695268	0.185189	0.289961	0.701831	0.116844	0.921034	0.516007	0.677592	-0.201788	0.83886	0.217146	0.834683
AT1G62510	AT1G62510	AT1G62510	-2.27914	0.0717948	-1.69397	0.175559	2.63927	0.0084255	3.27542	0.00111367	4.1848	6.59e-06	6.79253	6.27e-14	0.000929501	1	-1.84539	0.175854	2.02272	0.163917	-0.98618	0.443273	-1.50912	0.248307	1.79072	0.216733	0.653616	0.852515	1.42904	0.396855	0.0541618	0.988106
AT5G18380	AT5G18380	AT5G18380	0.492448	0.43144	0.0617879	0.929618	-0.0408302	0.93946	0.204058	0.722788	-0.355156	0.418848	-0.30254	0.480147	0.468758	0.370152	0.407028	0.54736	0.337154	0.659804	0.667857	0.123339	0.419325	0.445624	0.0814908	0.93755	0.432562	0.684259	-0.109656	0.908595	0.171074	0.849071
AT3G28270	AT3G28270	AT3G28270	0.0099502	1	-0.384393	0.803929	0.395662	0.732236	3.33515	0.000334262	5.40952	2.08e-10	3.60932	3.35e-05	-1.27915	0.291727	-0.770304	0.673361	-0.417166	0.857665	1.25965	0.257025	2.38755	0.022893	1.88789	0.136339	-1.23549	0.614595	0.424059	0.835957	-0.70744	0.713366
ACT2	AT3G18780	AT3G18780	0.628759	0.0166046	-0.0893929	0.807572	-0.117156	0.667084	-0.560028	0.0174298	-0.923114	9.84e-06	-0.999482	1.37e-06	-0.236437	0.457539	0.0452299	0.947606	0.0852803	0.879795	-0.501559	0.0346001	-0.398564	0.150843	0.0811567	0.880658	-0.146558	0.853053	0.251445	0.529412	0.0827648	0.878005
AT1G76960	AT1G76960	AT1G76960	-0.62385	0.836704	0.706302	0.723462	2.51104	0.053616	2.49183	0.0762591	0.716287	0.646259	1.09794	0.432304	-2.5951	0.0743868	-0.621836	0.839188	0.138922	0.970104	-2.68344	0.0508443	0.857253	0.681436	-0.313267	0.924856	-4.64503	0.0085057	-3.57596	0.0491318	-2.04628	0.376385
UBQ1	AT3G52590	AT3G52590	0.424496	0.499875	0.50506	0.295755	0.062831	0.899142	0.0225539	0.98889	-0.417279	0.304479	0.0699698	0.883943	0.800506	0.052533	0.637407	0.215466	0.53784	0.371552	0.838669	0.0322516	0.539823	0.267326	0.347954	0.600424	0.527183	0.576963	0.0105955	0.99144	0.141439	0.87239
AT4G18440	AT4G18440	AT4G18440	-2.24123	0.00667226	-1.1894	0.197103	-2.13366	0.00325522	-0.576969	0.549281	1.52758	0.0361548	-1.79713	0.0118785	2.54954	0.000360989	2.20089	0.0073896	0.445216	0.786055	3.41124	6.92e-07	3.37064	3.07e-06	2.2755	0.00637896	0.43804	0.866161	1.66667	0.131142	0.465763	0.763304
COR413-PM1	AT2G15970	AT2G15970	-0.497011	0.592337	0.019027	0.986045	0.00709945	0.993044	1.46907	0.00512835	2.58429	3.15e-08	0.817675	0.114345	0.059376	0.974253	-0.152468	0.91534	0.108482	0.940995	1.24707	0.0191904	0.291794	0.738863	0.784007	0.305155	-0.412452	0.80246	-0.0823907	0.952968	-0.275722	0.806103
TT4	AT5G13930	AT5G13930	-0.103054	0.98322	-1.21058	0.388145	-2.56231	0.0135293	-2.43344	0.0274437	0.995158	0.39525	4.11115	1.95e-05	-1.16272	0.420168	-1.76223	0.225653	-2.56224	0.0604299	-1.45231	0.234682	-0.968655	0.529666	-1.45625	0.36883	1.22558	0.659434	1.27995	0.47757	1.19316	0.549154
AT3G62870	AT3G62870	AT3G62870	-0.260944	0.827773	-0.852413	0.183551	-1.20874	0.0188339	-0.58117	0.358477	-1.35231	0.00709709	-0.572448	0.29505	-0.0880588	0.951356	-0.322777	0.772302	-0.0988942	0.94742	0.336338	0.647788	-0.279641	0.756268	-0.135658	0.918798	0.62389	0.653518	-0.401583	0.689788	0.369293	0.728508
AT4G16190	AT4G16190	AT4G16190	-0.0533845	0.984824	0.590846	0.481014	0.983318	0.115627	1.93829	0.00138709	0.582315	0.38786	0.494306	0.452746	-1.0711	0.130313	-0.456286	0.703375	-0.394835	0.762442	-1.25761	0.0509901	-0.592125	0.499728	0.0487968	0.979789	-0.774619	0.623392	-0.164066	0.91221	-0.357613	0.78263
PMDH2	AT5G09660	AT5G09660	-0.398762	0.582253	-0.870014	0.0655669	-1.72875	5.55e-06	-0.0385008	0.973	1.01416	0.0100383	-1.87346	4.45e-07	-0.212943	0.771512	-0.664617	0.24448	-0.515291	0.452307	-0.915501	0.0312921	-0.934546	0.0425497	-0.570112	0.362812	0.12244	0.955515	0.0109746	0.991782	-0.0260707	0.985561
AOC1	AT3G25760	AT3G25760	-2.1675	0.126953	0.178652	0.926557	0.538619	0.678942	0.342177	0.84411	1.73088	0.120951	-0.159654	0.909229	5.06687	4.35e-07	3.98902	0.000443828	0.722898	0.754098	3.92795	0.000178415	4.33638	6.38e-05	2.49538	0.0666278	-1.91352	0.435787	2.98937	0.0491318	0.379856	0.882984
ALP	AT5G60360	AT5G60360	-0.412527	0.674616	1.02144	0.0838873	1.30763	0.00751839	1.10574	0.03868	1.77316	0.000162289	1.05344	0.0310621	-0.771072	0.211433	-0.414697	0.665779	-0.247482	0.836592	-1.28212	0.0129493	-0.156253	0.873463	-0.123265	0.924667	-1.07647	0.286554	-0.391033	0.687233	-0.879979	0.323931
AT1G11860	AT1G11860	AT1G11860	-0.110708	0.943345	-0.65419	0.327147	-2.46177	2.34e-07	-0.934967	0.0951213	0.702487	0.191169	-2.18369	3.18e-06	0.174874	0.873061	-0.328313	0.762037	-0.51982	0.580274	-0.336925	0.637887	-0.431063	0.57638	-0.586919	0.486244	0.283426	0.881154	0.288938	0.78154	0.00623863	0.997954
CRB	AT1G09340	AT1G09340	-0.0204712	0.994114	-0.858303	0.080936	-2.17794	2.1e-08	-0.523193	0.292296	0.793422	0.0596259	-2.45282	9e-11	0.209526	0.782165	-0.560672	0.379948	-0.400643	0.614105	-0.126691	0.860651	-0.682647	0.194625	-0.433399	0.547262	0.455515	0.691809	0.11744	0.908595	0.128723	0.901378
AT3G49910	AT3G49910	AT3G49910	0.306661	0.756744	-0.0267549	0.976943	-0.535155	0.290717	-0.49814	0.384432	-0.913627	0.049953	-0.533627	0.27219	0.238942	0.776515	0.507236	0.518211	0.307009	0.759027	0.539153	0.342328	0.381125	0.591439	0.152786	0.892807	0.503669	0.694159	0.180249	0.860141	0.51373	0.563716
HPR	AT1G68010	AT1G68010	-0.297834	0.750997	-0.896027	0.0884952	-1.78753	1.91e-05	-0.0837632	0.920032	0.961507	0.0288045	-1.42892	0.00061379	-0.475064	0.445247	-0.968257	0.0806434	-0.753577	0.259223	-1.34686	0.00238528	-1.51804	0.00108211	-1.02469	0.0691085	0.0817947	0.976459	-0.047656	0.968994	-0.17801	0.864076
POM1	AT1G05850	AT1G05850	-0.730521	0.421383	-1.16436	0.0823804	-2.49688	2.84e-06	-1.00096	0.112703	0.590204	0.347055	-3.01588	5.67e-09	-0.24163	0.827067	-0.353574	0.772719	-0.712106	0.462157	-0.315708	0.709578	-0.314637	0.747535	-0.583041	0.554125	0.052693	0.992369	0.409905	0.715193	0.398393	0.733555
CYP18-3	AT4G38740	AT4G38740	-0.114123	0.914199	-0.490429	0.335858	-0.276678	0.538229	0.93292	0.0214102	1.79024	4.29e-07	0.590773	0.131163	0.269043	0.676582	-0.112247	0.918228	-0.361783	0.626926	0.461215	0.326468	0.0370804	0.968185	0.000200506	1	-0.244623	0.859486	-0.318262	0.666607	-0.0344074	0.976995
GGP1	AT4G30530	AT4G30530	-0.340732	0.823135	-0.179109	0.871796	0.273507	0.732965	0.625872	0.448895	0.893604	0.197631	0.306134	0.689327	2.90564	2.29e-06	1.55332	0.0499614	0.116919	0.950781	2.45614	0.00010958	2.03857	0.00341361	1.54702	0.0600998	-0.27967	0.91855	1.31441	0.194018	0.28582	0.850397
AT3G09440	AT3G09440	AT3G09440	1.29064	0.0128471	-0.162227	0.829196	0.0649314	0.914215	-1.20068	0.00998556	-1.79026	1.87e-05	-0.86742	0.0508977	-0.929037	0.0658172	-0.726636	0.253912	-0.473684	0.562144	0.0233783	1	-0.474405	0.458843	-0.12561	0.912232	-0.911391	0.337834	-1.07622	0.105432	-0.534692	0.532903
CYP83B1	AT4G31500	AT4G31500	-0.480146	0.699597	0.531336	0.548997	-0.370738	0.613652	-0.455083	0.586944	-0.925156	0.15447	-0.165102	0.830127	1.89492	0.0025537	0.894222	0.334204	0.116207	0.947972	2.24511	0.000216588	1.02254	0.191182	1.19538	0.158354	-0.485555	0.810484	0.351889	0.78252	0.34862	0.796377
GAPC1	AT3G04120	AT3G04120	-0.148641	0.752517	-0.313826	0.270795	0.0215738	0.944376	-0.379284	0.126654	-0.605703	0.00468241	0.248505	0.287497	0.0567332	0.918729	-0.346827	0.277519	-0.0708807	0.901025	-0.106252	0.761868	-0.148078	0.681159	-0.452701	0.128576	0.0187005	0.994491	-0.764005	0.00824033	-0.271294	0.516904
RPS17	AT1G79850	AT1G79850	0.691842	0.323399	-0.263031	0.717813	-1.27674	0.00534734	-0.323812	0.614505	0.781835	0.105391	-1.30497	0.00348903	0.838707	0.125629	0.431212	0.614998	0.204944	0.858196	0.531403	0.356885	0.20204	0.816365	0.120714	0.920268	0.509921	0.693477	0.0579445	0.962824	-0.109347	0.927462
AT3G41768	AT3G41768	AT3G41768	0.999681	0.142574	0.530712	0.45194	1.51172	0.00225955	0.345293	0.625639	-0.413062	0.484242	1.77095	0.000213886	1.0591	0.0657461	0.0817456	0.95901	0.638775	0.4656	0.59536	0.343558	-0.028495	0.984083	0.516041	0.563446	-0.614562	0.655239	-1.24109	0.100947	-0.0879245	0.948967
AT4G32020	AT4G32020	AT4G32020	0.318045	0.677104	-0.0568381	0.934922	0.813213	0.0366762	0.739292	0.0821966	-0.327582	0.460193	0.0968437	0.841245	0.227281	0.739686	0.173504	0.853998	0.0841494	0.938799	-0.113241	0.867427	-0.123178	0.871739	-0.105298	0.915155	-0.447851	0.66735	-0.0107907	0.991666	0.0798221	0.937894
rps4	ATCG00380	ATCG00380	1.9531	1.42e-06	1.17956	0.00854665	0.785766	0.0590327	1.76478	7.73e-06	2.15143	6.93e-09	0.675268	0.100771	1.99977	1.42e-07	1.65199	9.87e-05	1.26249	0.00912256	1.35238	0.000814798	1.16556	0.00863161	0.856755	0.114031	0.0747348	0.97663	-0.537569	0.445043	0.0051316	0.997906
AT1G78040	AT1G78040	AT1G78040	-0.133319	0.910477	-0.531188	0.359529	-1.06663	0.0131577	-0.815137	0.0883915	0.260452	0.619177	-2.29701	6.41e-09	0.297125	0.684465	0.250259	0.798196	0.0722235	0.954934	0.148659	0.84094	0.171921	0.836097	-0.131048	0.902814	0.109169	0.96617	0.542257	0.470345	0.396721	0.649711
ARFA1E	AT3G62290	AT3G62290	0.789174	0.00487853	0.677348	0.015228	0.187093	0.519899	0.831599	0.000945562	0.575657	0.0202092	-0.548954	0.0250995	0.0734254	0.901257	0.279965	0.507531	0.228568	0.640017	-0.566295	0.032425	0.0614871	0.904814	0.0953163	0.87125	-0.428333	0.471288	0.125236	0.811328	0.0644823	0.918801
TRX5	AT1G45145	AT1G45145	0.89792	0.530083	2.3579	0.00912424	2.93756	0.000165306	1.64342	0.0677258	-0.296625	0.781217	1.20649	0.150462	3.43171	1.28e-05	1.57518	0.149656	0.820138	0.59472	2.54194	0.00206281	2.41699	0.00647528	1.39238	0.237996	-2.26006	0.103365	-1.38337	0.307264	-1.79136	0.196239
AT5G03350	AT5G03350	AT5G03350	-0.511809	0.890179	-1.35433	0.493573	-2.34154	0.111642	-3.77916	0.0103589	-7.21419	3.06e-08	-6.87968	1.38e-07	0.169872	0.972408	-1.20638	0.653586	-0.755893	0.819073	-0.69679	0.754291	-1.41855	0.490845	-0.86485	0.766271	-1.17624	0.792643	-3.61342	0.0821458	-6.22601	0.000221124
SAM1	AT1G02500	AT1G02500	0.0158672	0.989724	0.0134713	0.977054	-0.341411	0.168526	-0.367103	0.169881	-0.912373	2.83e-05	-0.776113	0.00042178	-0.225594	0.508527	0.166475	0.726962	-0.155263	0.759027	-0.377644	0.154733	0.00169108	1	0.140276	0.771983	-0.0772266	0.947778	0.28626	0.478844	0.0267927	0.969255
ATCG01130	ATCG01130	ATCG01130	0.757836	0.2968	0.293816	0.697642	-0.771056	0.137101	-0.410109	0.526941	-0.368611	0.523404	-1.2135	0.0110503	0.615313	0.35059	0.854369	0.21087	0.0898179	0.950257	0.257255	0.734652	0.30616	0.710011	0.0918546	0.946486	0.184571	0.935963	0.533708	0.546278	0.565998	0.549154
UBQ11	AT4G05050	AT4G05050	0.626969	0.274297	0.338008	0.550901	0.673179	0.0997161	0.418825	0.3943	0.398461	0.365913	-0.419377	0.319171	1.14324	0.00484568	-0.0114959	0.993145	-0.733462	0.202642	-0.301811	0.578547	-0.335735	0.577184	-0.428305	0.524103	-0.568061	0.567898	-0.781591	0.205629	-1.00712	0.102579
RBP31	AT4G24770	AT4G24770	0.383086	0.543408	-0.377062	0.449687	-1.74742	2.47e-07	-0.596815	0.14347	0.126355	0.788703	-2.01667	8.72e-10	0.474148	0.31617	0.183418	0.829086	0.0364555	0.971632	0.248854	0.623348	-0.233939	0.694866	0.0444813	0.968023	0.526349	0.558079	0.419941	0.509041	0.453049	0.506609
FBR12	AT1G26630	AT1G26630	0.160557	0.657903	0.0989199	0.735971	0.306648	0.116315	0.108134	0.68909	0.157057	0.465414	0.15598	0.447224	0.488821	0.0134908	0.205764	0.517807	0.131032	0.742836	0.472795	0.0148204	0.297627	0.213753	0.0654572	0.884837	0.251197	0.60475	-0.159118	0.654375	-0.0569968	0.902756
LEA7	AT1G52690	AT1G52690	4.1135	0.206768	7.02352	0.00105099	6.42419	0.000589128	10.6655	1.56e-06	11.0662	2.06e-09	9.29495	1.87e-07	4.24108	0.118857	2.13225	0.553355	1.37882	0.740188	3.80009	0.149727	3.0777	0.245138	-0.0393922	0.995124	-1.52737	0.880853	0.357177	0.950776	-4.93691	0.235572
AT3G47070	AT3G47070	AT3G47070	0.296887	0.778892	-0.447764	0.506791	-1.37462	0.00339701	-0.242834	0.736343	0.938901	0.0530197	-2.13756	1.46e-06	0.262125	0.76161	-0.558741	0.482464	-0.255621	0.820242	-0.378185	0.562857	-0.826618	0.168039	-0.590832	0.450257	0.301014	0.859831	-0.0664375	0.959616	-0.0259466	0.987286
FNR1	AT5G66190	AT5G66190	-0.277305	0.664312	-0.754045	0.0474268	-1.45004	2.81e-06	-0.382225	0.339399	0.956945	0.00246383	-1.3763	6.14e-06	-0.0786904	0.927287	-0.538996	0.247245	-0.433209	0.433838	-0.333832	0.424009	-0.506677	0.232478	-0.573351	0.220829	0.24163	0.826743	0.0135955	0.987368	-0.00306442	0.997955
GSTF8	AT2G47730	AT2G47730	0.00789258	1	-0.219463	0.825469	-1.02459	0.0963454	-1.2092	0.0618644	-0.823761	0.192838	-1.03633	0.08268	-0.00789536	1	-0.316747	0.818564	-0.335388	0.806884	-1.0418	0.116194	-1.35603	0.0471631	-1.09621	0.186981	-0.614703	0.717661	-0.739817	0.472893	-0.681673	0.54999
ccsA	ATCG01040	ATCG01040	2.28666	2.54e-08	1.34873	0.00317654	1.11548	0.00749374	1.29339	0.00269326	2.10364	6.11e-08	0.0295914	0.960027	1.74108	1.79e-05	1.38034	0.00318439	1.06055	0.0538442	1.53322	0.000229365	1.32567	0.00349605	0.929343	0.0934446	-0.176761	0.923121	-0.252745	0.770966	-0.0761315	0.946117
RPS5A	AT3G11940	AT3G11940	-0.0170726	0.996105	-0.28674	0.618083	-0.753352	0.0578719	-0.654554	0.136032	-1.18034	0.00157128	-0.717687	0.0645839	-0.0373317	0.981999	0.135232	0.895076	0.000868203	0.999737	0.1257	0.850903	0.0291775	0.976618	-0.193733	0.820283	0.490254	0.63408	0.089425	0.926982	0.430943	0.566168
RD20	AT2G33380	AT2G33380	-1.23848	0.132456	1.95932	0.00346109	3.65261	1.59e-10	1.29415	0.0544447	3.70612	4.52e-11	2.32969	5.5e-05	1.53798	0.0209451	0.296747	0.84357	-0.335508	0.817204	1.39306	0.0338672	1.13768	0.135664	0.597639	0.589401	-1.61023	0.132204	0.316647	0.807484	-1.40903	0.172069
PGK1	AT3G12780	AT3G12780	-0.150407	0.841542	-1.0398	0.0020563	-1.51618	3.1e-07	-0.780469	0.0185631	0.115359	0.778272	-2.16563	2.67e-14	-0.147115	0.805838	-0.81615	0.0290685	-0.770315	0.0625128	-0.500864	0.16314	-0.880296	0.0108558	-0.808477	0.0378368	0.458362	0.55979	-0.0594655	0.94272	-0.0957426	0.902836
AT2G01010	AT2G01010	AT2G01010	1.13382	0.0838365	0.630398	0.357699	1.61807	0.00106178	0.465634	0.481749	-0.340567	0.578226	1.89067	7.69e-05	1.18207	0.0353811	0.163226	0.907808	0.737538	0.379155	0.697297	0.250903	0.0430579	0.972695	0.611201	0.470247	-0.60867	0.657698	-1.2562	0.0985777	-0.0296262	0.986831
AT3G22240	AT3G22240	AT3G22240	0.657668	0.773025	-0.00804653	0.997058	-0.0460648	0.976063	-2.27144	0.0436063	-3.1123	0.0019476	-3.10461	0.001779	0.0548403	1	0.124061	0.968894	0.728437	0.743723	-0.341005	0.849632	0.539092	0.769709	0.749395	0.710596	-1.54144	0.554571	-2.15621	0.182831	-3.69639	0.00753074
AT1G73600	AT1G73600	AT1G73600	-2.40841	0.0106395	-2.73716	0.00191703	-2.356	0.00374475	-0.327161	0.799122	2.5614	0.00108454	-2.55974	0.00114615	-1.36619	0.166681	-1.46496	0.193287	-1.97985	0.0691796	-1.07445	0.272035	-1.33512	0.20047	-0.657286	0.673751	-0.333917	0.926656	-0.34188	0.849597	0.157102	0.942297
MTO3	AT3G17390	AT3G17390	-0.0852908	0.966402	-1.26286	0.0526433	-2.19814	3.54e-05	-1.29338	0.0304629	-0.602203	0.331637	-2.84254	3.16e-08	-0.130249	0.930449	0.206361	0.88686	0.216537	0.877667	-0.178633	0.853376	0.178916	0.871739	-0.221371	0.864705	0.530685	0.74952	0.640064	0.5207	0.617153	0.568872
AT3G02080	AT3G02080	AT3G02080	0.547472	0.411054	0.438332	0.446611	0.0778698	0.887975	-0.363768	0.503291	-1.28926	0.00126199	-0.545705	0.208276	0.472945	0.412832	0.6193	0.31583	0.574526	0.407013	0.633449	0.187512	0.438827	0.462575	0.34655	0.659054	0.50789	0.651461	0.126232	0.901428	0.317748	0.709462
AT5G20190	AT5G20190	AT5G20190	0.00233938	1	-0.00076946	0.999488	1.14575	0.0261253	0.635377	0.30309	1.05683	0.0400751	0.537319	0.328387	2.9464	3.43e-10	1.16263	0.068038	0.982637	0.185983	1.77095	0.000467806	1.4571	0.00923331	1.69929	0.0033329	-0.577529	0.681831	0.191644	0.868537	0.591771	0.549011
APS1	AT3G22890	AT3G22890	-0.213634	0.828667	-0.0983828	0.894059	-0.474552	0.309741	0.028442	0.985628	-0.201984	0.703378	-0.345304	0.459129	0.451764	0.451222	0.0886001	0.945356	-0.506555	0.497432	0.24019	0.704176	0.181975	0.818298	-0.21905	0.812588	-0.100935	0.967239	0.751154	0.275415	-0.0363784	0.978207
CORI3	AT4G23600	AT4G23600	-1.79435	0.0783946	-1.11669	0.280365	0.633696	0.489023	2.00014	0.0165524	2.63495	0.000487174	1.10335	0.17874	2.38948	0.00324282	1.19323	0.30953	0.144135	0.950365	3.99686	9.18e-08	2.57281	0.0023571	1.5841	0.141422	-1.17417	0.556621	1.35404	0.300602	-0.0807267	0.973917
PSRP5	AT3G56910	AT3G56910	1.08468	0.0321796	0.22936	0.727078	-0.672073	0.127504	-0.419196	0.429327	0.360192	0.454325	-1.53202	0.000100004	1.06666	0.016987	0.511901	0.451255	0.498206	0.50137	0.579302	0.241452	0.212113	0.776797	0.425474	0.562546	0.69639	0.491834	0.342548	0.670971	0.380625	0.65344
AT4G16720	AT4G16720	AT4G16720	-0.295868	0.767203	-0.87694	0.114262	-1.08361	0.018348	-0.771173	0.137861	-1.35393	0.00226409	-0.732305	0.117088	-0.151358	0.882766	-0.338895	0.714832	-0.102615	0.937301	0.245349	0.727603	-0.31502	0.673264	-0.326602	0.715654	0.54661	0.657698	-0.388662	0.657274	0.272329	0.784202
GSTF6	AT1G02930	AT1G02930	0.407219	0.883171	-0.234522	0.900714	0.570133	0.659482	-3.80042	0.000459858	-4.06591	5.55e-05	0.531367	0.67135	0.927488	0.571607	-1.04434	0.588329	-0.461408	0.860671	0.116824	0.971466	-0.497792	0.798654	-1.88702	0.215851	-2.40115	0.256239	-3.05853	0.0428382	-1.56485	0.430468
AT4G27090	AT4G27090	AT4G27090	0.560567	0.293481	0.467636	0.328917	0.100611	0.829885	0.174735	0.750786	-0.037764	0.945209	-0.277155	0.491515	0.59468	0.177165	0.639402	0.200636	0.534571	0.359302	0.692532	0.0806381	0.546376	0.247013	0.325735	0.623626	0.435078	0.656176	0.168244	0.827806	0.167575	0.841279
AT4G17390	AT4G17390	AT4G17390	-0.100084	0.959916	-1.06975	0.130314	-1.645	0.00387474	-1.35957	0.0278444	-1.68872	0.00261619	-1.16475	0.0432227	-0.160734	0.909698	-0.253757	0.858667	-0.141307	0.930411	0.186467	0.851888	-0.225107	0.840376	-0.21715	0.875398	0.561004	0.744465	-0.557798	0.602667	0.369625	0.765309
SAC52	AT1G14320	AT1G14320	-0.103469	0.916772	-0.172565	0.763017	0.0833362	0.859059	-0.474828	0.261572	-0.858633	0.0144866	0.186314	0.65297	0.24157	0.69012	0.098829	0.922276	0.0916377	0.925039	0.40743	0.355306	0.136562	0.842081	-0.00589094	0.996268	0.427892	0.656176	-0.286722	0.676884	-0.0675829	0.942764
AT2G37220	AT2G37220	AT2G37220	0.0797516	0.940905	-0.756966	0.0667117	-1.52174	4.52e-06	0.274949	0.556757	0.223585	0.596143	-0.45983	0.208665	0.0640382	0.946689	-0.114703	0.903738	0.104385	0.911135	-0.209193	0.685481	-0.480334	0.307817	-0.00964389	0.992505	0.40494	0.669546	0.129989	0.870823	0.237492	0.74885
AT1G76600	AT1G76600	AT1G76600	1.83374	0.282717	0.899549	0.600351	1.08283	0.412261	0.435637	0.815433	0.539041	0.714579	0.378342	0.791228	2.03476	0.14187	0.595761	0.828486	1.24242	0.560549	0.596302	0.742618	4.6957	7.15e-05	0.610628	0.809997	-0.0511524	1	-0.117835	0.97061	-0.139887	0.967662
MSRB6	AT4G04840	AT4G04840	0.61485	0.721468	-0.562966	0.655521	-2.27231	0.0066199	-1.93378	0.0306273	-1.82143	0.0298827	-3.63802	5.5e-06	2.4932	0.00358978	1.14703	0.370201	-0.791977	0.626012	2.98696	0.000286588	2.04961	0.0300123	2.22758	0.0292677	1.07645	0.624547	1.33609	0.338729	1.16555	0.450747
RPL23AA	AT2G39460	AT2G39460	-0.208159	0.831422	-0.325372	0.595433	-0.838993	0.0484209	-0.905228	0.0446776	-1.33538	0.000821603	-0.992951	0.0145464	-0.018493	1	0.0537656	0.966254	-0.171336	0.868832	0.182349	0.791153	-0.0425593	0.965576	-0.288254	0.724128	0.517801	0.644266	0.156817	0.867755	0.219069	0.812806
RPE	AT5G61410	AT5G61410	-0.568118	0.0144175	-0.965644	1.09e-06	-1.09701	3.87e-09	-0.903816	2.65e-06	-0.242583	0.261992	-1.62288	1.36e-19	-0.508881	0.0163823	-0.84979	3.71e-05	-0.748568	0.000726018	-0.831965	1.38e-05	-1.05552	4.82e-08	-0.747208	0.000612609	0.210933	0.705832	0.182199	0.625095	0.224216	0.559689
AT5G62350	AT5G62350	AT5G62350	-0.891684	0.300335	-1.31564	0.0549943	-4.13318	4.84e-13	0.159616	0.868669	0.93559	0.122509	-3.48217	1.57e-10	2.28621	4.36e-05	1.25008	0.0891661	-0.124815	0.940252	3.20435	2.64e-09	2.07221	0.000627038	1.69498	0.0129529	0.173969	0.957287	1.39055	0.107562	0.76682	0.479216
BCS1	AT3G50930	AT3G50930	0.675218	0.767425	-0.282809	0.874713	0.670692	0.588921	-0.349649	0.838414	-3.2967	0.00108814	0.485955	0.695301	1.96491	0.107878	-0.158607	0.961667	1.42983	0.413917	0.763396	0.602366	2.25087	0.066895	0.614876	0.779996	-1.70734	0.507191	-1.47391	0.409825	0.275728	0.917175
PSB27	AT1G03600	AT1G03600	0.602197	0.344174	0.2199	0.737735	-1.47166	0.000257457	0.0772893	0.92331	1.49248	0.000152892	-1.6697	1.89e-05	0.806891	0.092702	0.222594	0.818761	0.160258	0.87881	0.189067	0.780345	-0.188493	0.806794	-0.339967	0.667659	0.357955	0.784031	0.111713	0.914811	-0.181995	0.852088
NIA2	AT1G37130	AT1G37130	-0.104338	0.956049	-0.67816	0.370847	0.406659	0.536623	-0.650204	0.346613	-0.13698	0.860425	-1.25036	0.0237655	-0.658746	0.393795	-0.417928	0.713631	-0.220376	0.876327	-0.227386	0.808652	-0.412245	0.64771	0.0420867	0.981967	-0.687598	0.650982	-0.811397	0.395203	-0.351431	0.772049
PSAE-2	AT2G20260	AT2G20260	0.87038	0.0381922	0.381554	0.419094	-0.916982	0.00711189	0.286223	0.528318	1.14908	0.000453196	-1.75562	3.15e-08	1.03759	0.00319026	0.357193	0.555696	0.403047	0.509316	0.707379	0.0568202	0.142036	0.827795	0.45226	0.411413	0.330915	0.746133	0.155231	0.836762	0.261135	0.711475
AT5G19240	AT5G19240	AT5G19240	1.45379	0.28186	0.306013	0.844375	0.202581	0.868073	-0.391044	0.786411	-0.732038	0.495235	-2.88752	0.00098528	1.92325	0.0646723	0.954443	0.55676	0.842808	0.640498	-0.289972	0.855707	-0.420974	0.803828	-0.132112	0.961296	-0.97984	0.705912	-1.0875	0.504357	-0.892093	0.626456
GUN4	AT3G59400	AT3G59400	0.573173	0.49229	0.147241	0.861747	-0.744045	0.15659	0.0152809	1	1.38859	0.00374951	-1.67258	0.000350772	-0.275896	0.755743	-0.615797	0.43827	-0.184641	0.882151	0.146657	0.866008	-0.514959	0.470111	-0.262608	0.806732	0.132504	0.964413	-0.283162	0.781562	-0.354325	0.729211
TLP18.3	AT1G54780	AT1G54780	-0.662219	0.369999	-0.622938	0.321625	-1.53396	0.00088536	-0.132506	0.866498	1.56823	0.000535048	-1.59847	0.000382004	-0.17105	0.86654	-0.731507	0.293374	-0.67117	0.393552	-0.514756	0.388006	-0.727581	0.239618	-0.947967	0.143739	0.100605	0.972513	0.00610607	0.997702	-0.195453	0.861802
RPS13A	AT4G00100	AT4G00100	-0.0620503	0.970792	-0.913032	0.078139	-1.15766	0.00742717	-0.659294	0.193588	-1.4247	0.000657139	-0.757544	0.0861362	0.00318539	1	-0.205536	0.847303	-0.148065	0.895561	0.143337	0.849632	-0.231916	0.763103	-0.360929	0.662995	0.50158	0.671193	-0.213945	0.817006	0.15644	0.882292
TAT3	AT2G24850	AT2G24850	-0.582627	0.827336	-1.53254	0.301431	-0.231399	0.876872	-2.95372	0.0158851	-6.15226	5.63e-09	-3.41941	0.00153851	4.36057	7.72e-05	1.19529	0.546627	-0.0797126	0.981957	3.89462	0.000539324	2.3748	0.0759033	0.337803	0.904643	-3.36754	0.0703087	-1.54266	0.428036	-2.16759	0.273686
ENODL2	AT4G27520	AT4G27520	-0.0905554	0.965662	-0.845952	0.25858	-0.561367	0.390281	0.450136	0.56152	1.20368	0.0389084	-0.438019	0.498406	0.712849	0.361355	-0.307101	0.82077	-0.303724	0.824889	1.34675	0.0278232	0.0218733	0.990896	0.315582	0.800868	-0.0789568	0.984395	-0.457747	0.685897	-0.573268	0.619662
RPL12-C	AT3G27850	AT3G27850	0.497048	0.467139	-0.473161	0.399711	-1.67591	1.96e-05	-0.476092	0.346999	0.178917	0.733358	-1.79801	2.69e-06	0.517214	0.349765	0.237524	0.800039	-0.0478737	0.968531	0.290225	0.615882	-0.146476	0.856062	-0.119293	0.908307	0.490524	0.657698	0.471844	0.520993	0.248761	0.781285
JAR1	AT2G46370	AT2G46370	0.295088	0.825367	0.31554	0.725352	1.00754	0.0898758	0.679616	0.330391	0.363045	0.59824	0.0983728	0.895268	4.27112	9.18e-17	1.43331	0.0370268	0.388739	0.754098	3.59443	7.27e-12	1.80472	0.00321126	1.92596	0.00280134	-0.725422	0.636094	-0.400991	0.726713	-0.390762	0.748391
PR1	AT2G14610	AT2G14610	-2.52709	0.234879	0.975202	0.657485	1.31365	0.427331	-1.77202	0.322738	-6.17289	1.18e-05	-5.33686	9.45e-05	-2.97552	0.082957	-1.92041	0.400553	-1.19081	0.685963	-3.30017	0.0381333	1.05829	0.651149	-0.754582	0.812482	-2.73578	0.416816	-4.14706	0.0474678	-8.33479	7.03e-08
AT5G54940	AT5G54940	AT5G54940	0.820518	0.340508	0.984081	0.157342	1.36729	0.0148279	1.06371	0.0885737	1.27238	0.0235669	0.832817	0.150195	2.28315	2.62e-05	1.33542	0.0537384	0.720286	0.454965	0.719628	0.291727	0.853475	0.246119	0.785904	0.373315	-0.51686	0.765572	0.282411	0.811328	0.166814	0.90527
AT2G41730	AT2G41730	AT2G41730	-0.981599	0.690939	-0.222836	0.918071	0.980146	0.485181	-1.8666	0.191452	-5.81708	2.7e-07	2.55101	0.0328804	-1.31743	0.450578	-0.674118	0.80862	1.84417	0.341149	-0.968341	0.562679	1.58361	0.335893	0.865352	0.715272	-1.62045	0.616475	-2.69524	0.148943	1.8289	0.415503
AT1G70600	AT1G70600	AT1G70600	0.33492	0.689487	-0.485568	0.391838	-0.71529	0.101194	-0.44338	0.396938	-0.532226	0.239635	0.0589196	0.91492	0.362781	0.571057	0.437448	0.551351	0.314668	0.717775	0.765056	0.0987366	0.527734	0.356595	0.162306	0.867484	0.580032	0.592081	-0.0944214	0.927763	0.353598	0.680113
AT3G53430	AT3G53430	AT3G53430	0.281765	0.693722	-0.181162	0.749629	-0.474557	0.219306	-0.516248	0.216575	-0.610386	0.0989981	-0.442152	0.237744	0.380183	0.45335	0.348316	0.588415	0.208539	0.797963	0.844691	0.024669	0.536189	0.250514	0.143632	0.860661	0.447849	0.638607	-0.142723	0.857491	0.0624291	0.94824
AT2G44120	AT2G44120	AT2G44120	0.313111	0.824733	-0.412007	0.649017	-0.840292	0.192476	-0.750749	0.301382	-2.17569	0.000132245	-0.616588	0.340458	0.405654	0.693604	0.118949	0.949161	0.53584	0.652159	1.03182	0.127277	0.397439	0.688438	0.290335	0.826726	0.678186	0.682736	-0.479678	0.681898	0.338549	0.796922
STZ	AT1G27730	AT1G27730	1.46835	0.39454	0.710041	0.668629	2.07759	0.0636916	1.12922	0.410762	1.30199	0.274714	2.33899	0.0294272	2.34128	0.0556113	-0.118058	0.971896	2.58193	0.0751515	0.951801	0.513855	2.58164	0.0386042	1.15117	0.543839	-1.2837	0.661978	-0.507488	0.828129	1.22641	0.562162
HEMA1	AT1G58290	AT1G58290	-0.206516	0.84288	-0.785122	0.139779	-1.49348	0.00035093	-1.72682	5.12e-05	-1.22492	0.00363246	-2.55294	1.17e-10	-0.125876	0.903221	-0.292209	0.752776	-0.435286	0.595244	-0.457992	0.404108	-0.815278	0.123388	-0.57935	0.403355	0.202552	0.907607	0.2179	0.811217	0.0636189	0.958428
LEA4-5	AT5G06760	AT5G06760	-1.35942	0.516298	2.93334	0.0323882	5.66108	4.61e-07	4.86316	2.92e-05	7.98263	1.48e-13	6.91331	2.02e-10	-1.4865	0.365156	-0.0789498	0.983642	1.2912	0.560573	-1.91194	0.170054	0.61197	0.776249	0.513927	0.852945	-4.2626	0.0337735	-0.545678	0.839113	-0.0969633	0.980846
RS27A	AT3G61110	AT3G61110	0.641198	0.245062	0.396644	0.458689	0.262249	0.56306	0.323983	0.522993	0.0342443	0.953421	0.164868	0.718804	0.769217	0.0804948	0.781207	0.119249	0.623624	0.295233	0.861725	0.0351209	0.755537	0.102604	0.316585	0.663764	0.521387	0.601448	0.136943	0.878097	0.294411	0.709381
SRC2	AT1G09070	AT1G09070	1.00112	0.443245	0.743156	0.509687	0.350226	0.721077	0.712685	0.492179	1.00463	0.245499	-1.14071	0.16658	2.25436	0.00657801	2.12321	0.0240014	0.661539	0.679353	0.621047	0.571162	1.4174	0.153423	0.569315	0.7143	0.100952	0.984395	0.411484	0.805472	-0.485345	0.779728
SAM-2	AT4G01850	AT4G01850	0.0889483	0.916016	-0.0403551	0.941612	-0.381997	0.24948	-0.0261403	0.978687	-0.388314	0.235657	-0.536747	0.0791841	1.56165	3.16e-08	0.535463	0.200636	0.269062	0.653118	1.88322	1.3e-11	0.879045	0.0077112	0.948888	0.00648131	0.177346	0.873555	0.668292	0.152158	0.201804	0.753776
RPS15A	AT1G07770	AT1G07770	0.678231	0.283355	0.397251	0.514404	-0.21746	0.679093	-0.247741	0.692467	-0.563846	0.224691	-0.802367	0.0629157	0.452749	0.461396	0.516077	0.466374	0.327252	0.714465	0.364315	0.529742	0.426222	0.499832	0.0175736	0.989443	0.337069	0.811976	0.47532	0.539254	0.319706	0.71822
RPL16B	AT4G18730	AT4G18730	0.411579	0.660388	-0.220149	0.777936	-0.556152	0.295051	-0.38432	0.548489	-1.3339	0.00438413	-0.38645	0.468336	0.189931	0.847892	0.029392	0.984886	0.0879664	0.95031	0.514639	0.396335	0.109998	0.913234	-0.134646	0.912595	0.489603	0.725659	-0.351207	0.714612	0.163795	0.890841
UBC8	AT5G41700	AT5G41700	0.726436	0.159415	0.698894	0.132567	0.682095	0.0835243	1.19005	0.00213897	1.31732	0.000268177	-0.218121	0.619544	0.337538	0.559077	0.491098	0.414127	0.337488	0.653652	-0.0725862	0.925294	0.0549761	0.948589	0.263891	0.723673	-0.370617	0.744132	0.341622	0.633879	0.192077	0.822524
PTAC16	AT3G46780	AT3G46780	0.438071	0.637855	-0.354184	0.626271	-3.1142	1.01e-11	-0.312045	0.651879	0.302899	0.608907	-3.89307	2.18e-18	0.740305	0.227159	0.607798	0.440645	-0.00220675	0.998882	0.564993	0.351255	0.0691078	0.949924	0.39887	0.667528	0.312507	0.859486	0.528185	0.549293	0.194591	0.865637
AT1G54410	AT1G54410	AT1G54410	0.213076	0.821098	0.0805883	0.910632	0.567125	0.188454	0.795468	0.0729809	1.25036	0.00125822	1.10429	0.00433609	0.518351	0.333773	-0.0528399	0.965856	0.148175	0.885454	0.617854	0.184281	0.207485	0.771897	-0.198502	0.823085	-0.149616	0.93654	-0.160603	0.858193	-0.0178777	0.99011
UBQ6	AT2G47110	AT2G47110	0.498538	0.402554	0.203767	0.728466	-0.0891614	0.8569	0.141808	0.81251	-0.162596	0.732913	-0.196472	0.652599	0.514396	0.289339	0.709091	0.158588	0.594212	0.308987	0.776068	0.0545264	0.667233	0.151023	0.43071	0.493579	0.427029	0.674005	-0.134329	0.876844	0.334577	0.661174
XTH24	AT4G30270	AT4G30270	0.0836274	0.986658	0.904686	0.557856	1.53698	0.177219	-0.734557	0.620536	-1.23883	0.290714	-2.17557	0.039873	0.0372975	1	0.835264	0.693499	0.792658	0.723307	-0.349548	0.849782	1.32129	0.370299	1.05184	0.579875	-1.59052	0.551093	-0.156628	0.957623	-0.397109	0.877459
GASA1	AT1G75750	AT1G75750	-0.828993	0.663198	-0.842133	0.548545	2.15518	0.0279431	-3.68442	0.000136354	-2.98944	0.00146632	-2.53532	0.00713754	-2.19769	0.041625	-1.0782	0.516719	0.223225	0.934836	-1.38395	0.227592	0.334196	0.862032	-0.428844	0.845548	-1.83469	0.393095	-1.77346	0.260716	-1.72951	0.323931
AVP1	AT1G15690	AT1G15690	0.30501	0.524887	-0.198693	0.630497	-0.661055	0.0173943	-0.748598	0.00960221	0.0164209	0.973356	-0.425046	0.134151	-0.624902	0.0414797	-0.162554	0.794896	-0.133389	0.842784	-0.701615	0.0150267	-0.436984	0.222291	-0.518043	0.182697	-0.000278709	1	-0.13789	0.812941	-0.394762	0.443153
AT2G41840	AT2G41840	AT2G41840	0.329956	0.721975	-0.345896	0.600613	-1.15302	0.00967957	-0.603788	0.257172	-0.978352	0.029366	-0.437377	0.368458	0.194719	0.824884	0.203182	0.85321	0.156074	0.892026	0.443709	0.444078	0.168353	0.846705	-0.123321	0.91473	0.523319	0.666642	-0.0194494	0.986941	0.43913	0.622888
GOX2	AT3G14415	AT3G14415	-0.34918	0.63091	-0.616493	0.203666	-1.44595	8.23e-05	-0.457781	0.328458	0.476804	0.253046	-1.39824	0.000107825	-0.605952	0.201298	-0.669966	0.209913	-0.6603	0.257406	-1.47486	8.64e-05	-1.20458	0.00354807	-1.1128	0.0147037	0.0189413	1	0.0160523	0.987368	-0.3285	0.676647
AT1G07940	AT1G07940	AT1G07940	-0.15961	0.787824	-0.572899	0.0671596	-0.383902	0.177805	0.0764716	0.862052	-0.642499	0.0143856	0.391614	0.152316	0.31436	0.388482	0.013501	0.987164	-0.00421958	0.996576	0.595364	0.0352143	0.0773642	0.884873	0.118097	0.843565	0.415886	0.528262	-0.463142	0.288549	-0.00412594	0.996827
ROC3	AT2G16600	AT2G16600	-0.350001	0.591863	0.311045	0.543971	0.708886	0.0513577	0.0177765	0.994426	-1.03272	0.0028009	0.342281	0.375942	0.249019	0.679432	0.00745587	0.996469	0.559631	0.317199	0.655996	0.0972892	0.51344	0.276355	0.316412	0.631401	-0.123671	0.943994	-1.08794	0.0274659	-0.593482	0.360365
SAG29	AT5G13170	AT5G13170	-0.0198985	1	-0.160411	0.941288	5.47846	7.09e-07	7.63183	5.36e-12	6.41494	2.49e-09	7.41194	3.06e-12	0.12269	0.979698	0.103395	0.977155	0.826806	0.746624	0.165365	0.954727	0.99057	0.585485	2.24675	0.171847	0.490171	0.926656	0.265942	0.928941	-0.87959	0.725074
CYP79B3	AT2G22330	AT2G22330	-0.259443	0.888168	0.135487	0.913003	-1.49777	0.034777	0.0472297	0.985628	-2.89039	9.15e-06	-1.9725	0.00336185	3.31858	4.45e-07	1.0966	0.277098	0.273622	0.875971	4.27648	2.93e-11	1.15328	0.191864	1.97095	0.0176617	-0.614819	0.777771	0.929316	0.438877	0.577475	0.684633
CP5	AT1G64720	AT1G64720	-0.519422	0.44314	-0.566197	0.295782	-2.05654	1.18e-07	-0.224001	0.71469	-0.328908	0.494895	-2.40365	1.81e-10	-0.537826	0.3263	-0.0596164	0.962823	-0.562665	0.415617	-1.31255	0.00158755	-0.552286	0.322906	-0.430227	0.550281	-0.290113	0.837749	0.474327	0.520244	-0.30076	0.724289
AT3G16370	AT3G16370	AT3G16370	0.372357	0.865744	-0.880393	0.469219	-3.79675	4.42e-06	-1.2492	0.221096	0.372896	0.737222	-5.48523	9.03e-12	-0.20455	0.929725	0.204813	0.93637	-0.349163	0.873027	-0.642852	0.596309	-0.69655	0.608434	-0.530887	0.76879	-0.030598	1	0.247571	0.908595	0.473088	0.804938
JAZ6	AT1G72450	AT1G72450	-0.139453	0.944374	-0.0687167	0.954713	0.477387	0.527096	0.262657	0.795709	0.749634	0.289928	-1.45386	0.0227027	3.59469	1.48e-09	2.62126	0.000103213	0.876583	0.416748	1.52988	0.0243555	1.92371	0.00600582	1.25807	0.156074	-0.095604	0.983477	1.28921	0.202791	0.311123	0.833553
UBQ5	AT3G62250	AT3G62250	0.211279	0.821525	-0.223071	0.722085	-0.629238	0.136653	-0.346362	0.509027	-0.69166	0.0952428	-0.409868	0.341495	0.183018	0.812717	0.298035	0.71259	0.214074	0.820227	0.412816	0.419148	0.29844	0.639355	0.0489308	0.968675	0.441693	0.691809	-0.0505542	0.962661	0.419749	0.591727
ATL5 AT3G25520	AT3G25520	AT3G25520	-0.0213362	0.995687	-0.914702	0.105436	-1.17988	0.0113733	-1.13303	0.022659	-1.45491	0.00123793	-0.893486	0.0563406	-0.0128268	1	-0.165714	0.893284	-0.106595	0.935763	0.448704	0.462574	-0.0336888	0.978339	-0.220909	0.831212	0.53331	0.675651	-0.170981	0.873698	0.157082	0.892781
psbC	ATCG00280	ATCG00280	0.257289	0.841469	0.0114016	0.99223	-0.532968	0.377036	0.425761	0.551039	1.81816	0.000372913	-0.318862	0.605183	0.555009	0.470791	0.471456	0.642558	0.0394899	0.980838	0.404921	0.586212	0.092505	0.935932	-0.104828	0.943449	-0.0745776	0.984395	-0.491194	0.626448	-1.02052	0.279823
AT1G29070	AT1G29070	AT1G29070	0.696707	0.382579	-0.299495	0.703633	-1.74297	0.000376613	-1.00178	0.0736153	-0.655582	0.233056	-2.0768	1.19e-05	0.700686	0.2876	0.493669	0.591281	0.233791	0.851541	0.31374	0.671989	0.151611	0.881702	0.175519	0.887389	0.569862	0.684259	0.719462	0.405564	0.0691896	0.962511
GSTU20	AT1G78370	AT1G78370	-0.985812	0.433646	-1.53907	0.098464	-1.81226	0.0197036	-0.168325	0.903668	0.539532	0.558351	-0.46573	0.599501	0.659009	0.58109	0.164357	0.944715	-0.303603	0.87614	0.24398	0.855707	0.0753496	0.967924	-0.915244	0.477569	-0.0551208	0.997056	1.01993	0.446766	0.314374	0.86387
AT3G11510	AT3G11510	AT3G11510	0.344694	0.691417	-0.0482017	0.952789	-0.28934	0.572179	-0.275176	0.653308	-0.632208	0.168128	-0.702258	0.110847	0.56062	0.32867	0.481026	0.513961	0.308466	0.737845	0.85398	0.0701974	0.466784	0.450693	0.0931061	0.936383	0.554127	0.626876	0.0847288	0.940213	0.143911	0.893512
RPL12-A	AT3G27830	AT3G27830	0.326445	0.645269	-0.62184	0.17795	-1.34716	0.000150817	-0.570342	0.181998	0.22943	0.608702	-1.57578	4.84e-06	0.490277	0.31375	-0.0412092	0.971749	-0.263662	0.737845	0.233075	0.664332	-0.237431	0.700319	-0.284451	0.690362	0.455141	0.647737	0.273336	0.710573	0.0831995	0.931976
AGP21	AT1G55330	AT1G55330	1.02876	0.511303	0.799616	0.541617	-1.82807	0.0509728	-3.60924	6.02e-05	-1.41442	0.140756	-3.67255	2.16e-05	0.843861	0.535773	1.49903	0.248882	1.45426	0.306238	0.648942	0.611632	1.19889	0.334304	1.66112	0.196343	0.773609	0.787679	1.47458	0.332227	1.39709	0.407695
c-NAD-MDH1	AT1G04410	AT1G04410	-0.651752	0.123092	-0.629668	0.102501	0.0334751	0.940049	-0.533362	0.142148	-0.884226	0.00453401	-0.19271	0.598753	-0.422259	0.316602	-0.772184	0.0479059	-0.528628	0.282323	-0.502066	0.172445	-0.628808	0.102693	-0.834191	0.034515	-0.31919	0.734296	-0.660289	0.185035	-0.688264	0.205263
AT3G54210	AT3G54210	AT3G54210	0.195981	0.835143	-0.540836	0.29992	-1.46177	0.000129246	-0.945115	0.0255725	-0.0216735	0.976355	-1.66885	6.78e-06	0.272482	0.686434	-0.167768	0.866449	-0.272531	0.751913	-0.0533954	0.956242	-0.391515	0.503743	-0.346204	0.640935	0.554019	0.590825	0.196861	0.814773	0.0286104	0.982984
AT2G18690	AT2G18690	AT2G18690	-0.0203082	1	1.31597	0.440852	1.1172	0.425743	-4.0531	0.00164661	-6.1106	3.33e-07	-1.44702	0.266805	1.68863	0.293408	0.797565	0.765492	0.295859	0.931599	0.189086	0.946482	3.32555	0.0151162	-0.0262808	0.994819	-2.54253	0.337834	-0.984146	0.683127	-1.09732	0.663691
AT4G34670	AT4G34670	AT4G34670	0.0103723	1	-0.400123	0.514409	-0.816345	0.067663	-0.657193	0.191756	-1.53663	0.000187787	-1.06787	0.0114254	-0.256134	0.739798	-0.0926137	0.944133	-0.11123	0.925302	0.00530141	1	-0.301794	0.667961	-0.304991	0.718818	0.446935	0.720832	-0.0970023	0.929122	0.409912	0.636587
TLL1	AT1G45201	AT1G45201	-1.1749	0.216865	-1.22881	0.138783	-3.09187	1.62e-06	0.915809	0.252459	2.96511	2.31e-06	-2.56889	5.34e-05	-0.17223	0.919938	0.0449999	0.983364	-1.30617	0.182981	0.05668	0.984709	0.637349	0.525103	-0.0169456	0.993026	0.374432	0.883615	1.1194	0.31841	-0.00788626	0.997954
SOT12	AT2G03760	AT2G03760	-1.05488	0.55486	0.166314	0.926657	0.881835	0.442723	-2.16964	0.0487607	-3.53767	0.000210983	0.965097	0.375187	0.629126	0.720562	-0.251734	0.930796	1.00988	0.593885	0.682463	0.632606	1.92983	0.111821	0.183884	0.947515	-1.11948	0.68858	-2.40104	0.109546	0.278591	0.912
PSRP6	AT5G17870	AT5G17870	0.950339	0.0325154	-0.0659539	0.920132	-1.2303	0.000535702	0.248783	0.62608	0.559663	0.147115	-1.42952	3.19e-05	1.17736	0.00147061	0.716844	0.141725	0.505474	0.408658	0.860287	0.026312	0.398333	0.446405	0.521616	0.361315	0.641669	0.456496	0.393049	0.552388	0.287777	0.701613
P40	AT1G72370	AT1G72370	-0.153471	0.89088	-0.86741	0.0861146	-1.1914	0.00423224	-0.55091	0.277031	-0.840435	0.0503814	-0.464598	0.304633	0.0685108	0.95452	-0.0262393	0.984651	-0.137551	0.900283	0.350952	0.540088	-0.000142987	1	-0.293343	0.724128	0.522433	0.646487	-0.232472	0.792116	0.168949	0.865473
AT3G59540	AT3G59540	AT3G59540	0.436751	0.596315	-0.36152	0.583151	-0.620055	0.200873	-0.489292	0.382954	-1.20918	0.00592584	-0.287884	0.574417	0.262416	0.743356	0.171728	0.882419	0.151155	0.896572	0.534176	0.335372	0.16128	0.854503	-0.227588	0.817818	0.643669	0.575836	0.169378	0.867768	0.31008	0.74368
AT4G18100	AT4G18100	AT4G18100	0.451623	0.619576	-0.332973	0.649122	-0.640459	0.224041	-0.394723	0.540103	-0.773976	0.127993	-0.1024	0.870043	0.403886	0.59233	0.269655	0.809481	0.292362	0.791694	0.781086	0.159487	0.3903	0.606307	0.0652171	0.964265	0.579029	0.657698	-0.209048	0.844065	0.115037	0.927031
FBA5	AT4G26530	AT4G26530	-0.306367	0.863526	-1.08095	0.228776	-3.31526	7.68e-07	0.464773	0.63683	1.47132	0.0376688	-4.09551	3.5e-10	0.457385	0.706679	-0.154214	0.942295	-0.377863	0.81912	-0.928781	0.27092	-0.682567	0.51179	0.288974	0.857592	0.28858	0.926656	0.548238	0.690803	0.384629	0.80397
ARF1 AT1G23490	AT1G23490	AT1G23490	0.014373	0.991811	-0.088005	0.835161	-0.120827	0.694131	-0.722118	0.00523565	-0.592743	0.0169196	-0.873537	0.000217543	1.22646	1.67e-07	0.404528	0.258644	0.112203	0.856395	0.903274	0.000248275	0.356781	0.281893	0.196045	0.682702	0.0443699	0.977972	-0.280527	0.53236	-0.324896	0.490028
AT3G60245	AT3G60245	AT3G60245	0.115631	0.938972	-0.793621	0.201651	-0.931804	0.0667717	-0.828975	0.137436	-0.627385	0.239635	-0.00453868	0.997616	0.271424	0.760259	0.272426	0.810268	0.129128	0.92359	0.530774	0.392574	0.408716	0.591261	-0.177589	0.881918	0.598938	0.653518	-0.0372816	0.978315	0.386749	0.701316
PGY1	AT2G27530	AT2G27530	-0.143447	0.905205	-0.626771	0.27232	-0.987757	0.0262466	-1.05443	0.0244634	-1.16995	0.00657148	-0.659664	0.14469	0.00120726	1	0.043934	0.974193	-0.0358669	0.978654	0.284118	0.65392	0.00499661	1	-0.217207	0.822999	0.522908	0.657858	-0.232911	0.801957	0.223982	0.821238
PSRP4	AT2G38140	AT2G38140	1.11188	0.050574	0.22875	0.754441	-0.889813	0.0590136	-0.285608	0.661363	0.654989	0.178729	-1.38134	0.00163338	1.14835	0.0196456	0.716075	0.28273	0.507683	0.54277	0.821886	0.10699	0.480233	0.467479	0.40164	0.637647	0.559573	0.651163	0.35897	0.689397	0.0710767	0.95495
rpl2 ATCG01310	ATCG01310	ATCG01310	-0.0211027	0.990737	-0.880412	0.0160485	-1.42884	3.51e-06	-1.00709	0.00240927	-0.346463	0.338757	-1.2674	3.1e-05	-0.136612	0.832659	-0.557774	0.220819	-0.737363	0.0953685	-0.453516	0.238201	-0.741858	0.0485824	-0.893268	0.0235214	-0.236799	0.830358	-0.127594	0.860196	0.0532101	0.952786
AT1G07930	AT1G07930	AT1G07930	0.061054	0.951265	-0.80741	0.0196566	-0.850662	0.00495042	-0.0545045	0.928501	-0.742431	0.0141086	0.214943	0.532984	0.113393	0.862062	0.0144292	0.988504	-0.0332769	0.970125	0.499784	0.152344	0.130058	0.821307	-0.031659	0.973986	0.488205	0.514302	-0.234932	0.696125	0.272404	0.664027
CP1 AT5G49480	AT5G49480	AT5G49480	1.55947	0.053496	0.0410908	0.9748	2.36642	0.000132099	0.150111	0.894872	-0.146496	0.871388	1.03128	0.119018	2.25079	0.000464403	0.029207	0.988838	1.22059	0.198337	2.19112	0.000676456	0.608556	0.528142	1.71775	0.0308337	0.398492	0.862699	-0.732683	0.528487	-0.343212	0.812138
DIP2	AT5G03210	AT5G03210	2.34136	0.189189	2.44301	0.11616	4.1043	0.000937529	5.94653	1.78e-06	5.08802	2.36e-05	4.21099	0.000520154	3.49472	0.0097926	0.572612	0.85508	2.73115	0.125695	2.9583	0.0299777	2.37071	0.132693	1.68065	0.414626	-2.68639	0.337834	0.0851453	0.980495	-0.578858	0.847005
AT1G52300	AT1G52300	AT1G52300	0.397241	0.628112	-0.279164	0.673323	-0.586956	0.211178	-0.232542	0.718707	-0.278576	0.594409	-0.212961	0.676665	0.666478	0.218597	0.429078	0.582019	0.433775	0.598356	0.746162	0.126562	0.537965	0.368825	0.272113	0.759955	0.625433	0.570171	-0.0920547	0.933292	0.395762	0.65307
AT3G44010	AT3G44010	AT3G44010	0.730744	0.112692	0.247491	0.638121	0.28517	0.482957	0.0550225	0.941136	-0.493929	0.187405	-0.0320336	0.947551	0.667701	0.101613	0.505343	0.340297	0.507935	0.378049	0.810364	0.0294197	0.556631	0.219065	0.213456	0.769811	0.604272	0.469929	0.291048	0.666875	0.464352	0.480191
rpl2 ATCG00830	ATCG00830	ATCG00830	-0.0793616	0.935017	-0.940682	0.00940115	-1.49416	1.29e-06	-1.07254	0.0011707	-0.40827	0.249619	-1.33265	1.21e-05	-0.183861	0.753824	-0.616736	0.161314	-0.800174	0.0628435	-0.506567	0.178121	-0.802566	0.0300784	-0.957155	0.013207	-0.237324	0.830439	-0.128422	0.860008	0.0488594	0.957552
MAT3	AT2G36880	AT2G36880	-0.0487569	0.98161	-0.473103	0.451188	-0.952658	0.0383598	-0.689066	0.187864	0.498237	0.31897	-1.27554	0.00336416	-0.194508	0.82666	0.1313	0.919164	-0.297018	0.764938	0.195133	0.794675	0.53132	0.400156	0.309048	0.728476	0.163076	0.939477	0.366411	0.674861	0.189203	0.859321
GRP3S	AT2G05380	AT2G05380	-0.0684031	0.984824	0.318481	0.804407	-0.749786	0.395388	0.421779	0.716806	-1.64147	0.0371825	-0.601726	0.489926	-3.11785	4.12e-05	-0.635662	0.678107	0.777593	0.601171	-2.81602	0.000278764	-1.04955	0.320418	-0.869426	0.513591	-5.4289	4.33e-13	-1.94851	0.0943778	-0.782009	0.614777
LEA3	AT1G02820	AT1G02820	0.842618	0.61858	-0.0944237	0.955607	2.97403	0.000668794	1.80467	0.0691738	2.5956	0.00307679	1.22361	0.195212	-0.516014	0.749473	-1.69678	0.166934	0.108196	0.967593	-0.410703	0.780707	-1.30279	0.277305	-0.725688	0.677292	-0.678533	0.825435	-0.803888	0.638688	-2.41065	0.099172
FER1	AT5G01600	AT5G01600	-2.51467	0.00260391	0.73602	0.486263	0.921924	0.263346	0.0102583	1	1.525	0.0450066	3.21009	4.12e-06	-0.668998	0.557978	0.368773	0.838137	0.898775	0.500159	-0.141209	0.926978	0.668147	0.557123	0.642734	0.649705	-0.66547	0.775406	0.0933598	0.963374	0.930394	0.515605
XTH6	AT5G65730	AT5G65730	0.136688	0.972168	-0.844108	0.556597	-2.89657	0.00294475	-3.85587	8.28e-05	-2.03716	0.0421522	-4.61849	6.22e-07	-1.78387	0.127848	-1.16743	0.478967	-1.09584	0.544263	-1.42053	0.222912	-0.982655	0.500242	-1.76609	0.211284	0.191197	0.976098	0.317993	0.894441	-0.0674291	0.984688
AT1G09690	AT1G09690	AT1G09690	0.197194	0.851239	-0.0844234	0.912396	-0.864119	0.0491812	-0.202713	0.757665	-1.01248	0.0176203	-0.655126	0.136754	0.370592	0.57483	0.282919	0.758893	0.278599	0.768684	0.612844	0.225488	0.245	0.740165	0.212367	0.822438	0.515249	0.656926	0.111087	0.917534	0.418511	0.624104
GSTF7	AT1G02920	AT1G02920	0.609586	0.837644	0.496492	0.809313	0.798814	0.588486	-3.78271	0.00371837	-7.91744	2.09e-11	-0.295397	0.851701	0.600382	0.798648	-1.11855	0.632915	-0.40006	0.901263	-0.10084	0.98644	0.578147	0.800291	-1.83287	0.339742	-2.26782	0.430856	-3.20567	0.0825758	-1.59732	0.497939
FAMT	AT3G44860	AT3G44860	-0.607351	0.817699	-0.400405	0.834355	0.519592	0.709139	0.935343	0.532682	1.34713	0.276607	-0.566517	0.669759	3.86517	0.000618953	2.76674	0.0442387	1.01215	0.650908	2.17731	0.0795212	2.87909	0.0238125	1.69163	0.326852	-2.51551	0.265227	0.845643	0.705961	-0.765806	0.749234
VSP1	AT5G24780	AT5G24780	-1.0508	0.651921	3.1179	0.0314353	-1.23497	0.36629	1.82115	0.17936	6.87448	1.81e-09	-0.553878	0.69483	6.07999	2.64e-08	5.02417	0.000127756	1.90069	0.296387	7.55169	2.14e-12	8.47994	4.93e-13	4.78981	0.00012139	1.6997	0.567898	4.25657	0.0103619	0.558632	0.837534
AT2G27710	AT2G27710	AT2G27710	0.597873	0.373401	0.0492361	0.951322	-0.191187	0.71827	-0.0372954	0.978399	-0.461313	0.333882	0.297102	0.539528	1.09928	0.0167246	0.766581	0.195342	0.674146	0.317655	1.40186	0.00110329	0.933539	0.0633706	0.561896	0.414946	0.673026	0.528262	0.0681256	0.954265	0.232475	0.806544
NUC-L1	AT1G48920	AT1G48920	-0.366217	0.764963	-0.706618	0.34532	-1.15195	0.0453871	0.356291	0.654672	-1.23219	0.0284293	1.11162	0.046785	0.302265	0.768061	0.305979	0.814666	0.4991	0.653118	1.50987	0.00931407	0.408292	0.65075	0.660394	0.481	0.649305	0.67004	-0.711726	0.466936	0.258868	0.842462
AT4G29020	AT4G29020	AT4G29020	1.11104	0.778453	1.81629	0.466361	-2.21058	0.280918	-2.66425	0.200001	-0.382428	0.879074	-0.843426	0.693893	1.418	0.617453	1.58278	0.637897	1.05695	0.796772	-0.269955	0.947233	2.26176	0.355453	2.32932	0.418483	1.57198	0.776093	3.44426	0.223913	4.97261	0.0670254
AT3G09500	AT3G09500	AT3G09500	0.74438	0.229868	0.522561	0.374317	-0.25798	0.620865	0.0521073	0.961633	-0.245771	0.64517	-0.745658	0.0912487	0.764686	0.140945	0.838394	0.151043	0.669251	0.334185	0.79581	0.100059	0.661331	0.245224	0.550366	0.437208	0.587422	0.604873	0.413009	0.609816	0.474945	0.576049
AT3G22230	AT3G22230	AT3G22230	0.381432	0.691417	0.222469	0.774191	-0.117367	0.851954	-0.406989	0.518715	-1.35612	0.00353369	-0.382449	0.470827	0.422685	0.562119	0.30448	0.769284	0.484618	0.591298	0.70391	0.208209	0.36454	0.631093	0.325032	0.73113	0.611605	0.627253	-0.189044	0.859142	0.310845	0.760098
psbI	ATCG00080	ATCG00080	0.742882	0.336201	0.137227	0.874713	-0.111798	0.868374	0.71642	0.23027	1.51422	0.00199437	-0.612202	0.253001	1.1654	0.0369129	0.505987	0.578536	0.634448	0.468902	0.918519	0.103195	0.489141	0.515391	0.631211	0.446295	-0.68316	0.604873	-1.25252	0.0976855	-0.211913	0.85978
ABCF1	AT5G60790	AT5G60790	0.430265	0.702483	-0.12348	0.89923	0.804331	0.175047	0.00481137	1	-1.45155	0.00761092	1.26392	0.0202193	0.64223	0.403464	-0.147088	0.926997	0.213341	0.879188	0.819999	0.206402	0.895879	0.207355	0.303336	0.800794	0.0368078	0.997472	-0.802298	0.394004	-0.40685	0.723561
MT1C	AT1G07610	AT1G07610	-0.575066	0.797524	-0.340614	0.840595	4.82988	1.81e-07	-0.201439	0.912799	0.367422	0.776938	-0.799569	0.465996	0.433526	0.823865	-0.556281	0.80862	0.44994	0.854236	0.459876	0.774619	-0.560814	0.745255	-0.354327	0.882559	-1.03318	0.717895	-1.37002	0.427629	-1.14638	0.549011
ATCG00670	ATCG00670	ATCG00670	2.03487	2.48e-07	0.980773	0.0323882	0.583589	0.171809	1.98178	2.57e-07	2.23364	1.02e-09	0.972079	0.0126309	2.10204	1.61e-08	1.18281	0.00971109	0.830867	0.140778	1.8603	1.02e-06	0.999937	0.027024	0.658092	0.262798	0.0318494	0.995251	-0.606196	0.372689	-0.801748	0.250482
AT3G57450	AT3G57450	AT3G57450	1.55957	0.0752869	0.446865	0.670187	1.67553	0.0149928	0.943941	0.247823	0.697748	0.366424	1.43377	0.0357121	3.16827	1.12e-06	2.21922	0.00380059	2.86435	0.000108961	2.01115	0.00412789	1.87559	0.0138883	2.00276	0.0141953	-0.0288122	1	1.00076	0.390635	1.20883	0.330658
ASPG1	AT3G18490	AT3G18490	0.648137	0.545807	0.458993	0.61153	-0.255187	0.735482	0.813212	0.263546	1.06657	0.091443	0.151129	0.844576	-0.731236	0.380221	-0.0899971	0.962497	-0.264147	0.860671	0.508373	0.538776	0.10059	0.93943	0.0734128	0.969259	-0.656755	0.701497	-0.698799	0.521315	-0.464402	0.711281
MYBR1	AT5G67300	AT5G67300	0.400443	0.751003	0.188448	0.851935	1.61294	0.00547101	0.0253246	0.998019	0.222232	0.772722	0.784641	0.202219	2.87265	2.16e-07	2.0842	0.00106767	1.74105	0.0164056	1.49647	0.0149738	1.65736	0.0107407	1.3448	0.0784841	-0.710558	0.65664	-0.0252753	0.987141	-0.0541951	0.976376
AT5G47700	AT5G47700	AT5G47700	0.814309	0.323787	0.149205	0.873359	0.0336558	0.96614	-0.313246	0.69461	-0.767427	0.188577	-0.00801671	0.994569	0.9739	0.132773	0.608007	0.513981	0.63443	0.515578	1.05061	0.0798644	0.625583	0.415997	0.318701	0.781713	0.721642	0.614595	-0.00823986	0.99659	0.445876	0.690573
P5CS1	AT2G39800	AT2G39800	-1.78137	0.0441953	-0.754064	0.447491	-0.124117	0.897095	2.15421	0.003242	2.33958	0.000618038	1.9601	0.00430608	-2.6457	0.000178488	-0.760951	0.54229	-1.16152	0.296162	-2.29304	0.00145028	-1.05792	0.260275	-1.85428	0.0368416	-2.1012	0.0580905	0.0160173	0.993608	-0.925656	0.492627
AT4G15000	AT4G15000	AT4G15000	0.477683	0.479216	0.00134411	0.99876	-0.352684	0.444047	-0.352068	0.502608	-0.503615	0.248283	-0.0917	0.858109	0.602503	0.234086	0.748814	0.169056	0.428683	0.560573	0.901046	0.0349977	0.751998	0.125661	0.329343	0.665986	0.580453	0.567898	0.0976883	0.922586	0.306093	0.710637
AT1G77940	AT1G77940	AT1G77940	0.488777	0.565962	-0.0909281	0.915014	-0.431909	0.428001	-0.659634	0.244153	-1.11908	0.0182613	-0.38602	0.46546	0.510145	0.451913	0.532645	0.511302	0.633702	0.432099	0.843208	0.114175	0.595585	0.364502	0.313504	0.743855	0.556661	0.666728	0.0209169	0.986928	0.354195	0.71875
TUB4	AT5G44340	AT5G44340	0.195042	0.784008	-0.0476677	0.934531	-0.295692	0.418771	-1.66838	6.34e-08	-2.10671	5.03e-13	-1.92038	6.58e-11	0.0186737	0.99811	0.280655	0.64379	0.176569	0.814	-0.087258	0.880908	-0.0701703	0.917199	0.283059	0.635449	0.0702703	0.970626	0.32852	0.575443	0.539591	0.35694
AT5G35530	AT5G35530	AT5G35530	-0.157062	0.890179	-0.679909	0.213713	-0.939961	0.0316162	-0.380745	0.499531	-1.50878	0.000232156	-0.399528	0.396076	-0.133899	0.893644	-0.1222	0.92082	-0.06311	0.96021	0.184943	0.796476	-0.223019	0.770594	-0.204626	0.830005	0.528475	0.650008	-0.0815768	0.9428	0.374127	0.67175
NHL3	AT5G06320	AT5G06320	0.316289	0.86512	-0.234365	0.851935	0.853217	0.291843	-0.728095	0.436073	-0.563115	0.514933	-0.391653	0.647309	0.598702	0.603785	0.148539	0.947919	0.313815	0.861941	-0.0123199	1	0.8515	0.408669	0.381739	0.812115	-0.575159	0.81239	-0.399448	0.795341	-0.860911	0.544901
RPS15	AT1G04270	AT1G04270	0.182381	0.841469	-0.202699	0.733922	-0.50743	0.217652	-0.373784	0.439454	-0.547066	0.175479	-0.33141	0.42718	0.215195	0.751628	0.108873	0.920495	0.0778533	0.943883	0.438568	0.351708	0.241599	0.703131	-0.190062	0.820283	0.48019	0.635259	-0.135497	0.877928	0.34291	0.657903
ATRBP45C	AT4G27000	AT4G27000	0.0787327	0.926232	0.323634	0.433174	0.194628	0.58424	-0.148423	0.745312	-1.54223	2.27e-08	-0.321984	0.317096	-0.241514	0.613575	0.35089	0.481527	0.0408427	0.962331	-0.42025	0.23844	-0.0500931	0.938692	0.12776	0.850801	-0.0117083	1	0.382104	0.463394	0.237596	0.699578
ERF4	AT3G15210	AT3G15210	1.54253	0.0203213	0.530212	0.502258	1.11627	0.0523706	1.31286	0.0278386	1.55069	0.00444163	0.772406	0.186881	2.39811	7.38e-06	0.724002	0.413545	2.17036	0.000443425	1.6377	0.0040473	1.75933	0.00347256	1.71204	0.00900151	-0.154133	0.963837	-0.299902	0.799174	1.21516	0.202573
rps7-A ATCG00900	ATCG00900	ATCG00900	1.50463	2.37e-05	1.16718	0.00176454	0.596911	0.101144	0.710066	0.0623948	1.42359	1.28e-05	-0.0633516	0.889438	1.36139	5.59e-05	1.3792	0.000171524	0.906004	0.0429524	0.880444	0.0153981	0.789571	0.0506983	0.817065	0.0671763	0.106752	0.955057	0.0252667	0.97859	0.416123	0.535106
rps7-A ATCG01240	ATCG01240	ATCG01240	1.50475	2.37e-05	1.16729	0.0017701	0.595991	0.101827	0.710685	0.0622389	1.42378	1.29e-05	-0.0646838	0.887039	1.36131	5.63e-05	1.37893	0.000172979	0.905266	0.0432796	0.880122	0.0154707	0.789443	0.0508705	0.81574	0.0677199	0.107451	0.954518	0.0252691	0.97859	0.415774	0.535558
AT1G64370	AT1G64370	AT1G64370	0.269962	0.885215	-0.461751	0.673323	0.375952	0.667048	2.21227	0.00254416	1.98217	0.00456029	1.58285	0.024761	0.861171	0.378928	-0.0934115	0.966028	-0.60302	0.675928	0.697411	0.455067	-0.0818598	0.961095	-0.606037	0.654573	-0.0974241	0.984395	-0.562687	0.689469	-0.201288	0.911329
SLD1	AT3G61580	AT3G61580	0.119389	0.895605	-0.194351	0.714445	-0.208341	0.609698	-0.301491	0.497694	-1.08957	0.000845255	-0.211583	0.588336	0.975607	0.00572133	0.525082	0.290864	0.75506	0.105787	0.673582	0.0693382	0.346272	0.483553	0.610604	0.206881	-0.0837537	0.967239	0.571758	0.308919	0.0991467	0.908022
AT1G57660	AT1G57660	AT1G57660	-0.00189193	1	-0.794211	0.190849	-0.822066	0.104483	-0.973257	0.0671025	-1.29731	0.00607815	-0.670704	0.18289	0.00794356	1	-0.142559	0.917419	0.00864607	0.996131	0.358153	0.595796	0.0544132	0.961644	-0.147039	0.902848	0.578734	0.657698	-0.299058	0.76284	0.377372	0.704126
AT1G21500	AT1G21500	AT1G21500	0.26134	0.82866	-0.354084	0.649682	-2.8992	2.83e-09	-0.859261	0.142896	0.669496	0.230544	-4.42503	2.08e-20	0.843769	0.180936	0.223912	0.860939	0.168443	0.900174	0.51917	0.434765	0.0436933	0.972665	-0.0683294	0.964963	0.513326	0.735273	0.323338	0.758947	0.102894	0.939921
RPS6 AT4G31700	AT4G31700	AT4G31700	0.0795565	0.960706	-0.515853	0.421253	-0.793764	0.10422	-1.34507	0.00536522	-1.57139	0.000418836	-0.378979	0.463365	0.177184	0.857215	0.179997	0.88076	0.0741163	0.957414	0.65956	0.230602	0.236569	0.777118	-0.22295	0.828637	0.613563	0.616931	-0.178234	0.865527	0.0582351	0.96632
AT2G41410	AT2G41410	AT2G41410	0.586166	0.336299	0.879869	0.0606186	1.65655	1.12e-05	0.986174	0.0198502	-0.161272	0.754448	0.345308	0.431391	-0.213196	0.771149	-0.316764	0.687165	0.221474	0.811172	0.0519956	0.9585	0.235713	0.729939	0.133626	0.892336	-1.00037	0.163407	-0.967179	0.104901	-0.575792	0.437552
ATBETAFRUCT4	AT1G12240	AT1G12240	0.021361	0.993052	1.24166	0.00497646	0.950101	0.0184769	0.108266	0.873023	1.60596	2.24e-05	-0.275437	0.54611	2.55685	2.61e-12	1.67531	6.77e-05	0.0362513	0.976298	2.31471	5.16e-10	2.7149	6.48e-13	1.66231	0.000103187	-0.169748	0.921973	0.834776	0.186062	-0.737854	0.30867
HSP81-3	AT5G56010	AT5G56010	1.08149	0.0089962	-0.156475	0.790298	-0.119625	0.793721	0.0397124	0.966529	-0.141571	0.761337	-0.0486371	0.918863	-0.817881	0.040254	-0.360867	0.575664	-0.139443	0.877907	0.342155	0.467377	-0.0534649	0.946832	0.0869652	0.925736	-0.425815	0.661467	-0.699092	0.220696	-0.399283	0.568629
ATARCA	AT1G18080	AT1G18080	-0.233132	0.794936	-0.764843	0.113573	-0.966473	0.015706	-0.541997	0.252926	-0.923782	0.0199712	0.0206248	0.971529	0.0199063	1	-0.146603	0.888004	-0.107785	0.920217	0.252697	0.662039	-0.118481	0.882311	-0.172072	0.849135	0.501337	0.638527	-0.299912	0.703313	0.232988	0.789072
NIT2	AT3G44300	AT3G44300	-1.32569	0.542248	3.40944	0.0117249	3.56671	0.00261949	-0.70189	0.695361	-4.16195	0.000429322	2.53753	0.0345383	-1.86537	0.23442	-2.76666	0.0712645	0.182271	0.959429	-1.49269	0.324223	2.12106	0.164045	-0.14443	0.969259	-0.580975	0.906944	-3.0432	0.095982	-3.16454	0.0989232
AT5G65220	AT5G65220	AT5G65220	0.756266	0.131907	0.225544	0.699045	-0.738779	0.0566377	-0.225688	0.676991	0.364236	0.393992	-0.953276	0.0093487	0.826035	0.0499315	0.564621	0.314739	0.345577	0.640859	0.399909	0.402987	0.110207	0.88485	0.530604	0.368753	0.522226	0.593812	0.446871	0.503988	0.284014	0.713866
EMB3010	AT5G10360	AT5G10360	-0.0425843	0.981977	-0.521609	0.325649	-0.938138	0.0196816	-0.662747	0.145629	-0.883756	0.0273399	-0.766892	0.0555389	-0.0966206	0.927227	0.0175182	0.989095	-0.0152841	0.991381	0.284308	0.612568	0.0198625	0.986705	-0.184919	0.83577	0.401989	0.730731	-0.220119	0.79195	0.170795	0.856297
ACD6	AT4G14400	AT4G14400	0.374947	0.822852	-0.461127	0.670917	-1.69586	0.0175181	-3.61131	1.46e-07	-3.73621	1.22e-08	-3.9196	2.16e-09	-1.7919	0.0194996	-1.08711	0.301202	-0.24317	0.895015	-2.62334	0.000190646	-1.70144	0.0367897	-0.944824	0.407299	-2.5075	0.0123765	-2.37068	0.0123088	-1.25443	0.327186
CP12-2	AT3G62410	AT3G62410	0.460759	0.642028	0.168624	0.848354	-0.379096	0.532661	0.539942	0.408392	1.261	0.0139205	-1.18231	0.0203459	-0.0192875	1	-0.387567	0.712393	-0.0340577	0.984323	-1.00031	0.0787848	-0.794949	0.240588	-0.37299	0.712575	-0.180732	0.94314	-0.346929	0.739052	-0.621009	0.533966
AGP12	AT3G13520	AT3G13520	1.63462	0.00438755	0.251206	0.759956	-0.275638	0.65713	-1.29917	0.0159561	0.0416401	0.958364	-1.31089	0.00834931	0.0276743	0.999884	0.818708	0.266397	1.04354	0.149818	0.141254	0.877755	0.222847	0.815862	0.633734	0.448662	0.408404	0.80668	0.739014	0.394004	0.806025	0.387775
UBC10	AT5G53300	AT5G53300	0.771252	0.000154876	0.891936	5.14e-06	0.601503	0.00144582	0.519068	0.0108323	0.267927	0.198537	-0.321134	0.10448	0.483735	0.021355	0.448509	0.0641557	0.360243	0.208257	0.0281179	0.95117	0.284771	0.267369	0.47585	0.052612	-0.176094	0.770323	0.103956	0.799581	0.25995	0.474309
LOX3	AT1G17420	AT1G17420	0.025193	1	-0.470783	0.764515	1.27657	0.223829	0.258332	0.873483	0.618301	0.595705	0.569529	0.610463	5.56664	3.04e-10	3.95808	8.39e-05	1.6432	0.263649	3.39297	0.000364743	2.91651	0.00516196	2.52729	0.0334121	-1.20279	0.646235	2.70994	0.0478897	1.33025	0.457337
AT5G15950	AT5G15950	AT5G15950	0.83513	0.148528	0.55843	0.32527	2.01092	5.86e-07	-0.409104	0.457271	-1.50381	0.000224663	-0.606084	0.174151	-0.904882	0.0626419	-1.30709	0.00715062	-0.19314	0.856335	-1.76906	2.22e-05	-1.23648	0.00843542	-0.685404	0.284835	-0.350467	0.801331	-1.03853	0.104816	-0.798826	0.295463
AT5G05600	AT5G05600	AT5G05600	-1.6127	0.266137	0.00570941	0.997829	0.600231	0.606254	-0.171398	0.930284	0.650223	0.582735	-0.252794	0.837097	5.78096	1.3e-10	4.36631	1.41e-05	0.869435	0.653118	4.78684	2.58e-07	4.26909	1.59e-05	1.99223	0.133219	-1.77265	0.439863	2.74055	0.0494867	-0.0730239	0.982214
AT1G65490	AT1G65490	AT1G65490	1.26361	0.203111	-0.0558838	0.967692	-0.105887	0.91238	-0.975393	0.246782	-0.559746	0.500018	-1.8981	0.0056336	0.546494	0.632318	0.108786	0.961616	-0.14313	0.945138	-2.10365	0.00357332	-1.7174	0.0337122	-0.913273	0.425179	-0.0245738	1	-0.492981	0.728483	-1.05407	0.423244
RPL5B	AT5G39740	AT5G39740	0.116408	0.928102	-0.732896	0.197667	-0.91862	0.0470068	-0.544247	0.323076	-1.06944	0.0170988	-0.288269	0.57604	0.375183	0.593733	0.112688	0.931601	0.120783	0.921659	0.727761	0.159067	0.216628	0.792281	0.0145488	0.991243	0.59106	0.61948	-0.391504	0.648922	0.169017	0.87659
RPL27AB	AT1G23290	AT1G23290	0.187329	0.834416	-0.202436	0.733582	-0.221006	0.626795	-0.453132	0.327326	-0.582945	0.143325	0.0749713	0.879054	0.283634	0.646645	0.362111	0.599962	0.192043	0.833247	0.635852	0.138042	0.404309	0.456871	-0.0106692	0.992201	0.511356	0.604627	-0.123888	0.89251	0.201323	0.811249
HSP81-2	AT5G56030	AT5G56030	1.27813	0.00171377	-0.156193	0.798243	-0.311617	0.46843	-0.628806	0.136059	-0.806098	0.0309311	-0.224118	0.599633	-1.03918	0.00761917	-0.535749	0.340653	-0.268765	0.734243	0.125738	0.844789	-0.23829	0.700904	0.0595015	0.956009	-0.337931	0.768293	-0.79941	0.165934	-0.24269	0.75937
HCEF1	AT3G54050	AT3G54050	-0.286337	0.69169	-0.908206	0.0274013	-2.0014	3.39e-09	-0.583981	0.155464	0.45027	0.249037	-2.20606	2.19e-11	-0.174924	0.794821	-0.847504	0.0565408	-0.692417	0.186457	-0.518971	0.218538	-1.08231	0.00559723	-0.689201	0.169231	0.288383	0.8052	-0.0494333	0.96038	0.0166901	0.989531
ACT7	AT5G09810	AT5G09810	-0.671041	0.0103984	-0.37803	0.180784	-0.122025	0.656474	-0.07034	0.849055	-0.015315	0.967365	-0.291485	0.217703	-0.00287913	1	-0.0286197	0.967057	-0.146124	0.770089	0.232703	0.420252	0.0758991	0.864763	-0.0680783	0.90379	-0.0352736	0.982081	-0.0643175	0.908595	0.0404034	0.946597
CHLM	AT4G25080	AT4G25080	-0.368561	0.712653	-1.01897	0.0793666	-3.03646	3.27e-11	-1.47426	0.00324979	-1.50867	0.00135723	-4.07894	6.42e-20	-0.297681	0.729142	-0.186301	0.882495	-0.642922	0.438363	-0.843089	0.125362	-0.826799	0.180724	-0.580523	0.475438	0.377667	0.81669	0.903609	0.250635	0.280593	0.793182
AT1G01100	AT1G01100	AT1G01100	0.439616	0.540258	0.307915	0.611803	0.130236	0.803955	0.0295757	0.984705	-0.293103	0.54673	0.318972	0.484512	0.608518	0.240845	0.640054	0.28336	0.576175	0.396279	0.644354	0.171417	0.502078	0.375944	0.279513	0.729805	0.560234	0.598819	0.271061	0.741955	0.596498	0.433968
APR2	AT1G62180	AT1G62180	0.592603	0.604136	-0.757278	0.364279	-0.314808	0.678026	0.222798	0.823868	0.500359	0.488114	-1.11175	0.0750958	-1.51002	0.0249146	-1.44706	0.0599561	-0.40791	0.76456	-1.51862	0.0196078	-1.52636	0.0299613	-1.21262	0.155657	0.0196396	1	-0.544176	0.643735	-0.530843	0.676647
CPN20	AT5G20720	AT5G20720	0.0286499	0.991811	-0.866668	0.152143	-1.60652	0.000705229	-0.740604	0.192649	-0.22036	0.723242	-1.36178	0.00383683	0.193829	0.847072	-0.271351	0.809934	-0.08585	0.951901	0.21081	0.795113	-0.146265	0.881448	-0.253268	0.813106	0.714518	0.560521	0.402585	0.669571	0.493217	0.611345
AT3G04840	AT3G04840	AT3G04840	0.0674613	0.964165	-0.768309	0.129156	-0.881691	0.0365769	-0.749662	0.105956	-0.567346	0.201293	-0.298681	0.521056	0.409047	0.498655	0.248286	0.788873	0.0806422	0.946822	0.692951	0.139627	0.422695	0.482765	-0.0509453	0.968448	0.613643	0.554706	-0.108867	0.916775	0.138558	0.892781
AOX1A	AT3G22370	AT3G22370	0.24517	0.910923	0.013124	0.994461	1.42464	0.0828215	1.63659	0.0594472	-0.778535	0.383931	1.45846	0.0666714	0.692987	0.569824	-0.596992	0.709258	0.358401	0.855346	0.465584	0.693676	1.19359	0.250083	0.792706	0.57193	-0.420215	0.891176	-1.63259	0.186393	0.28716	0.881614
RD21A	AT1G47128	AT1G47128	0.0386586	0.985788	1.48894	0.00337048	1.81167	4.62e-05	0.83081	0.114332	1.37642	0.00241699	1.33384	0.00294924	-0.864157	0.116553	-0.322895	0.745118	-0.144056	0.906879	-1.17496	0.0165753	-0.323041	0.672676	0.820813	0.220829	-0.649602	0.593771	-0.194696	0.851363	-0.672299	0.439849
AT5G38980	AT5G38980	AT5G38980	0.615103	0.597886	0.180197	0.868622	0.159399	0.848473	0.572941	0.487423	0.761938	0.272836	-0.577133	0.405597	-0.659611	0.46968	-0.606463	0.601488	-0.0526194	0.978379	-1.9012	0.00322483	-0.942066	0.259165	-0.552689	0.641348	-0.611506	0.747428	-0.877234	0.421881	-0.787299	0.515605
AT1G61890	AT1G61890	AT1G61890	1.99942	0.0127046	0.997332	0.26674	2.23655	0.000927279	2.12043	0.00258905	2.86964	8.62e-06	2.74842	2.26e-05	4.64902	9e-14	3.74217	3e-08	2.94135	7.85e-05	2.50042	0.000235432	2.61924	0.000244426	2.59948	0.000636762	-0.423936	0.862931	2.32657	0.01115	1.58889	0.172027
PIP1A	AT3G61430	AT3G61430	-0.310436	0.788377	-0.0541771	0.955777	1.25353	0.015735	-0.833871	0.162242	0.0507769	0.949103	-1.09818	0.0326485	-1.54865	0.00382458	-1.57761	0.00766605	-1.14973	0.106986	-1.54961	0.00336338	-1.83975	0.000770391	-1.60005	0.00831998	-0.661054	0.631674	-0.708074	0.42906	-1.13986	0.198578
AT5G19510	AT5G19510	AT5G19510	0.517257	0.449591	0.0465161	0.952645	-0.600957	0.177215	-0.327998	0.555591	-0.744268	0.0833215	-0.687126	0.104408	0.440034	0.458703	0.37593	0.628141	0.3897	0.629899	0.598961	0.22058	0.346358	0.589777	0.182215	0.847217	0.576593	0.593771	0.0741402	0.946771	0.47239	0.55718
COR47	AT1G20440	AT1G20440	0.952965	0.341006	2.25944	0.00119722	2.78698	6.14e-06	2.05888	0.00200233	2.87217	2.43e-06	2.0965	0.000715754	2.93396	2.29e-06	1.94988	0.00909358	0.867507	0.432714	2.5999	4.43e-05	1.35942	0.0802033	1.49843	0.0760568	-0.664341	0.72761	0.794237	0.490792	-0.116383	0.946872
GER3	AT5G20630	AT5G20630	0.645108	0.891007	0.423084	0.891969	-6.39035	0.000467828	-6.06574	0.000795026	-5.06331	0.00393664	-6.5963	0.000195499	0.343909	0.944166	0.23528	0.965666	-1.72698	0.614543	-0.690481	0.817734	1.17746	0.688866	-0.305446	0.951228	1.63134	0.76667	2.54391	0.399453	1.38852	0.704102
PGR5-LIKE A	AT4G22890	AT4G22890	-0.204514	0.813495	-0.55499	0.25218	-1.21146	0.000935825	0.118531	0.846511	1.1515	0.00143743	-1.51216	1.74e-05	0.182668	0.794172	-0.511372	0.377595	-0.558702	0.357745	-0.265929	0.613185	-0.690157	0.135945	-0.713665	0.173922	0.338344	0.770323	0.154338	0.853465	-0.0543623	0.958862
NEET	AT5G51720	AT5G51720	0.585785	0.684308	-0.3762	0.74109	-3.14443	7.19e-06	-2.00593	0.00741949	-0.0698708	0.949417	-3.35934	8.4e-07	0.693751	0.512544	0.35708	0.835271	0.463827	0.771139	0.38952	0.724076	-0.237172	0.867745	0.512981	0.71648	0.381744	0.890255	0.35508	0.815648	1.31172	0.30867
AT2G36160	AT2G36160	AT2G36160	0.244908	0.781122	0.0582486	0.935059	-0.212312	0.659367	-0.351411	0.497648	-1.07233	0.00563436	-0.630752	0.119287	0.345986	0.56922	0.445876	0.506995	0.369324	0.632672	0.585816	0.206081	0.380954	0.517511	0.185825	0.832618	0.599167	0.544831	0.130338	0.891605	0.44416	0.562912
NCED4	AT4G19170	AT4G19170	-0.499691	0.795923	-0.143504	0.926485	-0.475614	0.645911	1.23393	0.21989	2.4718	0.00297116	-1.02825	0.255644	-2.38665	0.00790545	-1.79246	0.106684	-1.02739	0.499405	-0.880474	0.42197	-0.368114	0.819464	-0.749906	0.639595	-0.989688	0.671003	-1.17185	0.428357	-1.95594	0.172027
AT3G24830	AT3G24830	AT3G24830	-0.0366746	0.984555	-0.377923	0.504739	-0.806118	0.0500043	-0.73781	0.0998395	-0.83435	0.039246	-0.826897	0.0380007	0.0304417	0.990195	0.120401	0.915331	-0.0435765	0.970125	0.184154	0.777437	0.0479926	0.958875	-0.22678	0.791158	0.486115	0.654714	0.0310071	0.977957	0.279799	0.739075
AT2G47610	AT2G47610	AT2G47610	-0.220789	0.834003	-0.831576	0.125655	-1.35289	0.00191044	-1.07416	0.0234305	-1.35815	0.00157138	-0.628348	0.17422	0.00437825	1	-0.086583	0.950457	-0.0643801	0.960502	0.403613	0.494057	0.0172786	0.990695	-0.0920409	0.939505	0.459207	0.720832	-0.248584	0.788257	0.333137	0.715531
ATCG00090	ATCG00090	ATCG00090	1.73616	0.00462868	0.841172	0.227276	0.747619	0.205691	1.58161	0.00501549	2.31866	5.32e-06	0.260201	0.687639	2.04627	0.000126714	1.23499	0.0706859	1.56161	0.0220209	1.72388	0.00169378	1.23513	0.0513409	1.43839	0.0323393	-0.383235	0.837976	-0.862698	0.350808	0.339084	0.775002
TCH3	AT2G41100	AT2G41100	0.340652	0.900142	0.586636	0.708885	0.466871	0.706792	-2.81558	0.00739053	-3.74323	9.28e-05	-0.155142	0.906613	1.97441	0.089198	0.952418	0.607137	0.80755	0.694472	-0.841895	0.538128	1.32793	0.333627	-0.0290632	0.992099	-0.918857	0.767486	0.446246	0.839435	0.579382	0.793182
CaS	AT5G23060	AT5G23060	0.424271	0.694768	-0.667641	0.355876	-1.69615	0.00120596	0.194537	0.823133	0.698729	0.2299	-2.2705	6.14e-06	0.232852	0.82597	0.0625803	0.970021	0.178504	0.898722	-0.0096199	1	-0.0541165	0.966546	-0.177491	0.893323	0.38176	0.83521	0.411726	0.697865	0.0520086	0.975648
HSPRO2	AT2G40000	AT2G40000	1.84005	0.258205	1.7105	0.233856	1.23077	0.32339	1.10668	0.439173	1.71992	0.146231	-1.13154	0.351414	1.49043	0.313826	-0.493487	0.858542	0.864371	0.710675	0.78443	0.620183	1.83869	0.200201	0.17391	0.957662	-0.519276	0.909498	-1.8272	0.331711	-1.2392	0.570188
GRX480	AT1G28480	AT1G28480	1.83592	0.488186	0.0591065	0.986045	2.10547	0.209044	0.453309	0.861575	-3.80464	0.0145232	-1.8341	0.265996	5.36026	0.000582369	2.02905	0.4071	1.32937	0.6696	2.09627	0.262619	3.95904	0.023581	0.230112	0.959568	-4.35287	0.183068	-1.50342	0.602667	-2.95765	0.28467
AT5G07090	AT5G07090	AT5G07090	-0.225177	0.851447	-0.666028	0.301431	-1.78021	0.000166917	-0.957347	0.0777254	-0.9347	0.0628553	-1.35539	0.00422393	0.0849267	0.95086	0.143725	0.918572	-0.111092	0.936665	0.295287	0.682843	-0.00711573	0.999104	-0.203602	0.855791	0.509406	0.717895	0.061522	0.962818	0.31214	0.767322
ERD9	AT1G10370	AT1G10370	-0.199216	0.923267	-1.2001	0.195246	-1.67137	0.0245798	-0.837094	0.355455	0.82399	0.309622	-2.32509	0.000940914	-0.0584879	0.988844	-0.707738	0.59731	-1.00693	0.413651	0.792443	0.392626	0.19717	0.896499	0.381472	0.812688	0.411646	0.881842	0.952871	0.454883	-0.126197	0.949163
BCB	AT5G20230	AT5G20230	0.396738	0.876435	0.953809	0.496255	0.881216	0.4386	-1.29101	0.28067	-2.05562	0.0414338	-0.562477	0.62526	2.8814	0.0052062	1.60185	0.263005	0.0745271	0.980697	1.6363	0.149625	1.85768	0.128022	0.500213	0.819501	-1.23424	0.646381	0.569987	0.78263	-1.10218	0.568872
TPI	AT3G55440	AT3G55440	-0.376413	0.397769	-0.149146	0.734804	0.0525589	0.887822	-0.3092	0.373774	-0.289982	0.354547	-0.702938	0.00973877	0.556738	0.0829127	-0.146321	0.823774	-0.38691	0.407799	0.495796	0.113239	-0.00617973	0.996465	-0.473911	0.243285	-0.195804	0.838729	-0.126036	0.837459	-0.259858	0.646449
TRX-M4	AT3G15360	AT3G15360	-0.17315	0.827336	-0.273304	0.583506	-0.504653	0.164544	0.236538	0.614402	1.33534	2.78e-05	-0.416378	0.244769	0.404219	0.383085	0.0179682	0.986574	0.2183	0.771327	0.293636	0.517769	0.238534	0.664699	0.216544	0.754394	0.0817054	0.967239	-0.0957666	0.909748	-0.00506448	0.997164
CPN60A	AT2G28000	AT2G28000	0.271691	0.855172	-0.94493	0.215349	-2.6378	3.79e-06	-0.405709	0.628336	-0.523114	0.449292	-1.60549	0.00570604	0.540544	0.5513	0.162595	0.924505	0.24227	0.872352	0.677468	0.365484	-0.0343501	0.983879	0.211222	0.884837	0.88345	0.557873	0.586739	0.595909	0.536468	0.662188
AT2G37190	AT2G37190	AT2G37190	0.781275	0.359814	0.212611	0.815604	-1.193	0.0323621	-0.206722	0.815422	-1.3021	0.0172978	-0.97333	0.0794628	0.735791	0.309399	0.806243	0.328549	0.610931	0.542282	1.30594	0.0246674	0.652307	0.395593	0.574728	0.549098	0.634922	0.671193	0.172173	0.898155	0.265751	0.83305
AT4G40040	AT4G40040	AT4G40040	0.0350177	0.976528	0.403988	0.255433	0.336683	0.263552	0.324908	0.334479	0.424483	0.141942	0.278562	0.34724	0.213804	0.628336	0.0830947	0.914593	0.0113817	0.990809	0.1972	0.608824	0.211353	0.627388	0.185213	0.734526	-0.177381	0.857647	-0.272084	0.590469	-0.385103	0.449849
EMB1080	AT3G48930	AT3G48930	0.09975	0.942807	-0.427166	0.4967	-0.733739	0.118309	-0.849389	0.0866313	-1.03261	0.0202788	-0.505713	0.287218	0.114815	0.919095	0.127136	0.920495	0.184721	0.868204	0.397103	0.504263	0.15792	0.856891	-0.00495784	0.99752	0.541785	0.654639	-0.234713	0.80304	0.364976	0.690229
CLPC1	AT5G50920	AT5G50920	0.0328787	0.971357	0.241018	0.461982	0.290001	0.259945	0.577293	0.0199196	1.14891	1.03e-07	0.702678	0.00170111	0.0463437	0.943659	0.060602	0.928764	-0.0641692	0.918636	-0.021706	0.980209	-0.052277	0.91568	0.348107	0.333314	-0.0432196	0.97663	0.0171935	0.97859	-0.107602	0.843818
TIP2;2	AT4G17340	AT4G17340	-0.929604	0.405875	0.133565	0.915014	1.99058	0.00369089	0.0836738	0.961651	0.606042	0.452551	-1.46167	0.0349324	-0.303524	0.825679	-0.161816	0.938238	-0.349645	0.836589	-0.527267	0.587746	-0.23995	0.86237	-0.834115	0.474056	-1.27174	0.425299	-0.250478	0.877691	-0.832921	0.536433
NDPK1	AT4G09320	AT4G09320	0.0129142	0.998114	-0.312089	0.534764	-0.426491	0.267496	-0.322718	0.475701	-0.31443	0.432366	-0.570499	0.109675	0.370473	0.457943	0.261546	0.711839	0.0953044	0.918876	0.510396	0.212992	0.295036	0.584081	-0.138916	0.864831	0.498409	0.577085	-0.0942035	0.914427	0.272248	0.705003
AT2G27720	AT2G27720	AT2G27720	0.90572	0.165721	0.571629	0.37623	0.0905646	0.886982	0.0893204	0.922791	-0.241089	0.685169	-0.134896	0.820895	1.01232	0.0606629	0.802432	0.235819	0.836943	0.244927	1.0783	0.0340145	0.83026	0.165932	0.613503	0.426906	0.629025	0.617109	0.0548367	0.966543	0.378895	0.699612
MS2 AT3G03780	AT3G03780	AT3G03780	-1.17917	0.0729648	-1.80826	0.00105099	-2.19765	9.16e-06	-0.275086	0.72085	0.649853	0.246508	-1.33083	0.0081961	-0.0491468	0.982429	0.242026	0.848541	-0.55961	0.55477	0.211379	0.806042	0.286005	0.751272	-0.0186146	0.990122	1.0401	0.343588	1.2295	0.113115	0.772319	0.419449
AT4G12735	AT4G12735	AT4G12735	1.02683	0.679078	0.628286	0.729804	2.2798	0.0559406	0.930111	0.579263	-6.45509	4.95e-09	1.92025	0.10454	2.18675	0.131132	-0.0929854	0.9797	1.97026	0.266514	-0.123475	0.977347	2.16698	0.126202	0.583199	0.820704	-1.25653	0.760554	-1.75464	0.371625	2.26668	0.264281
SIP3	AT4G30960	AT4G30960	0.291579	0.765708	0.729357	0.195246	0.944544	0.0372508	2.23043	2.37e-07	1.53211	0.000324369	2.03349	8.26e-07	-1.01256	0.042635	0.171742	0.8819	-0.157622	0.890781	-0.24101	0.726632	-0.0739469	0.93943	0.0128038	0.992129	-0.690231	0.536952	0.0596739	0.961557	-0.405339	0.656995
TROL	AT4G01050	AT4G01050	0.448989	0.458413	-0.26736	0.624313	-1.5631	7.5e-06	-0.383301	0.405867	-0.320597	0.446923	-1.6648	1.01e-06	0.198597	0.765891	0.249899	0.748384	-0.199489	0.816482	-0.0514768	0.953213	-0.179088	0.788547	0.0317034	0.978807	0.233538	0.859486	0.253621	0.729228	0.0380261	0.973154
emb1473	AT1G78630	AT1G78630	0.51987	0.516268	-0.245714	0.737815	-1.82841	4.17e-05	-0.538393	0.346319	0.164688	0.7876	-1.87703	1.7e-05	0.580143	0.353868	0.211892	0.852485	-0.0102368	0.995768	0.274897	0.689152	-0.121969	0.898359	-0.0274426	0.985818	0.542866	0.666642	0.494911	0.555703	0.255298	0.803566
BBC1	AT3G49010	AT3G49010	-0.197159	0.846013	-0.827464	0.10251	-1.12331	0.00696187	-0.944931	0.0368023	-0.961279	0.0217293	-0.576082	0.187906	-0.0855085	0.942093	-0.0217858	0.987004	-0.00709521	0.996383	0.213925	0.744869	0.0558751	0.953438	-0.204469	0.825043	0.529297	0.636956	-0.33818	0.678215	0.0341439	0.979959
DI19	AT1G56280	AT1G56280	0.57029	0.290436	0.593552	0.197137	0.169456	0.706738	1.24023	0.0007746	0.928098	0.00983156	-0.312045	0.438014	0.000416605	1	0.26021	0.730443	-0.0183197	0.988814	-0.374396	0.424439	-0.109934	0.880839	0.0756471	0.939402	-0.444972	0.653518	0.471096	0.458904	0.229572	0.770417
EIF4A1	AT3G13920	AT3G13920	0.222756	0.542248	0.165245	0.588637	0.236595	0.304912	-0.330331	0.16779	-0.8587	1.04e-05	-0.393878	0.0597178	0.377931	0.123315	0.236458	0.499731	0.229105	0.546479	0.49064	0.0254504	0.157396	0.634418	0.0872052	0.854247	0.256257	0.647737	0.0378925	0.946166	-0.110203	0.811924
AT5G44020	AT5G44020	AT5G44020	0.332864	0.84288	-0.97836	0.283009	-4.49289	1.02e-11	-5.12625	2.49e-15	-4.37765	1.09e-11	-7.13003	1.31e-24	0.165179	0.929284	0.78403	0.508431	0.523889	0.71939	-0.377049	0.724474	-0.163249	0.910914	-0.613655	0.636952	0.823052	0.661978	0.681583	0.595987	0.425577	0.779368
petB	ATCG00720	ATCG00720	-1.81154	4.76e-05	-2.20234	2.74e-07	-2.40198	3.6e-09	-1.7602	3.39e-05	-0.975238	0.0240339	-2.08765	1.91e-07	-1.69541	5.34e-05	-2.0445	2.99e-06	-2.31985	1.4e-07	-1.94288	2.67e-06	-2.31991	3.88e-08	-2.09699	2.41e-06	0.0872571	0.974023	-0.53803	0.47519	-0.129128	0.90485
CCoAOMT1	AT4G34050	AT4G34050	-0.484292	0.604329	-0.356732	0.639659	-0.0608707	0.930915	-0.0262774	0.99301	1.20022	0.0169903	-0.78282	0.131245	-0.928575	0.118857	-0.502187	0.581535	-0.833163	0.28739	-1.74335	0.00053702	-0.719428	0.2861	-1.0539	0.12328	-0.137753	0.964413	-0.181768	0.87718	-0.369598	0.723958
CIPK7	AT3G23000	AT3G23000	0.893027	0.142674	0.655497	0.26435	2.05988	1.41e-06	1.70584	0.000150784	0.968081	0.0335883	0.762886	0.0979617	-1.56367	0.000589565	-0.411617	0.625925	-0.134887	0.911135	-0.574099	0.298156	-0.367711	0.60286	-0.108596	0.926998	-0.820629	0.430856	-0.322525	0.721901	-0.302649	0.754793
AT5G21020	AT5G21020	AT5G21020	0.856264	0.257608	0.898295	0.166253	1.27967	0.0142095	1.67021	0.0016493	1.97933	5.88e-05	1.62052	0.00112733	0.0100366	1	0.154138	0.917494	0.284937	0.816482	-1.14926	0.0395744	-0.078665	0.945914	0.0906146	0.950638	-1.04587	0.347991	0.189455	0.875642	0.122461	0.928302
AT3G14067	AT3G14067	AT3G14067	-0.43345	0.493387	0.397668	0.440772	0.705985	0.0656017	1.65316	4.94e-06	2.0386	2.13e-09	0.923581	0.0107058	-0.478894	0.335077	-0.0751188	0.948012	-0.452391	0.491545	-0.552182	0.203981	-0.366857	0.503743	0.0228653	0.985278	-0.567381	0.542453	-0.33732	0.6309	-0.573342	0.407791
RPS9	AT1G74970	AT1G74970	0.577285	0.468367	-0.268136	0.72139	-1.65884	0.000334693	-0.594633	0.304516	0.0524021	0.942176	-2.28619	2.57e-07	0.578592	0.374001	0.345009	0.726956	-0.0954179	0.945373	0.249953	0.736399	-0.163099	0.863088	-0.120049	0.924251	0.51439	0.701629	0.48278	0.583004	0.294632	0.776241
CSD1	AT1G08830	AT1G08830	-0.474496	0.662972	-0.247753	0.784334	-0.356999	0.587653	-2.04674	0.000224765	-2.06456	8.73e-05	-0.725719	0.211691	-0.761732	0.293182	-0.723078	0.409749	-1.48153	0.0366867	-0.832925	0.198379	-0.71955	0.343799	-0.939841	0.244506	-0.47526	0.786156	-0.613029	0.540875	-0.327652	0.786429
FBA8	AT3G52930	AT3G52930	-0.00623388	1	-0.329011	0.427463	-0.417414	0.198403	-0.388351	0.282822	-0.585222	0.0562551	0.374814	0.235457	0.170583	0.751767	0.113554	0.88405	0.0209571	0.982468	0.178638	0.688293	0.242824	0.604759	0.00142308	0.999143	0.172662	0.877468	-0.154054	0.807168	0.100994	0.892781
BAM5	AT4G15210	AT4G15210	-3.13894	0.00928955	-2.54728	0.0324121	-1.07889	0.341891	-1.77592	0.123169	-0.927788	0.424061	-2.9329	0.00300797	3.81866	0.000112685	2.465	0.0454347	0.0385997	0.991381	4.88106	3.78e-07	3.74513	0.000377452	2.42067	0.0595742	0.366599	0.939477	1.85121	0.257872	1.18067	0.546785
SHM4	AT4G13930	AT4G13930	-0.0860928	0.964422	-0.973466	0.1353	-1.7362	0.000786297	-1.18325	0.039311	-0.185771	0.790319	-1.59967	0.00169728	-0.338279	0.715547	-0.148485	0.922276	-0.610276	0.523859	0.193654	0.829952	0.183529	0.861233	0.107479	0.940776	0.394906	0.826209	0.613303	0.517642	0.344211	0.761575
AT5G35480	AT5G35480	AT5G35480	1.03796	0.190524	-0.0975834	0.924547	-0.0011507	1	0.72672	0.291327	-0.0657521	0.939023	-3.75721	3.82e-13	0.622766	0.441161	-0.0588489	0.973391	-0.332025	0.800445	0.77707	0.253793	-0.996026	0.164493	-0.827929	0.348679	0.637038	0.686785	-0.205141	0.877157	-0.00405408	0.998671
DHS1	AT4G39980	AT4G39980	-0.578269	0.566564	-0.75914	0.311187	-1.87284	0.000977032	-0.659678	0.340306	0.441704	0.503525	0.271529	0.684461	2.15345	8.33e-05	1.35506	0.0487664	0.317008	0.808491	3.4346	3.24e-11	2.92039	1.1e-07	2.74255	1.8e-06	0.579413	0.721438	1.28679	0.134659	0.944399	0.358536
TIR	AT1G72930	AT1G72930	-0.042266	0.991811	0.208662	0.86749	0.271615	0.767565	-1.27855	0.119939	-0.915453	0.248357	-1.62992	0.0230669	-0.0272579	1	-0.150278	0.946292	0.312468	0.861655	-1.13381	0.178023	-0.0103761	0.999235	-0.017526	0.993598	-0.689083	0.753702	-1.31358	0.268994	-1.0506	0.437757
AT3G53870	AT3G53870	AT3G53870	-0.595952	0.18959	-0.782836	0.0378004	-1.07131	0.000762509	-0.811921	0.0192007	-0.956594	0.00256248	-0.695333	0.0318302	-0.314334	0.514501	-0.342097	0.553106	-0.452417	0.408658	-0.0443266	0.955955	-0.371617	0.42031	-0.523784	0.283193	0.488843	0.549101	-0.181184	0.790292	0.0304638	0.976376
AT5G19940	AT5G19940	AT5G19940	-0.298653	0.633595	-0.426349	0.330914	-1.60206	2.74e-07	-0.443191	0.258303	0.265098	0.490141	-2.06435	6.86e-12	-0.149059	0.815967	-0.526177	0.270077	-0.72169	0.111952	-0.500896	0.189895	-0.792346	0.0354213	-0.728659	0.0926384	0.198185	0.867357	0.403803	0.485107	0.139928	0.857721
FIB	AT4G04020	AT4G04020	-1.58272	0.0534937	-1.98116	0.00607555	-0.324392	0.687072	0.308267	0.758663	1.10493	0.105482	-0.744146	0.28701	-0.704456	0.450504	-1.26579	0.15056	-1.1881	0.226002	-0.331461	0.748036	-0.426563	0.69578	-0.745637	0.503983	0.25551	0.931457	0.0308088	0.98661	0.164824	0.921624
LTPG1	AT1G27950	AT1G27950	0.465087	0.755361	-0.874078	0.345344	-2.35543	0.000474255	-0.914599	0.269737	0.352114	0.682671	-0.537561	0.487397	0.292573	0.83166	0.721106	0.555872	0.270731	0.876824	0.163186	0.900113	0.177205	0.901573	0.309431	0.843246	0.0403867	0.999005	0.213675	0.900107	0.253969	0.880216
PP2CA	AT3G11410	AT3G11410	0.0579483	0.983292	1.15058	0.102409	2.05093	0.000251624	2.25004	9.53e-05	2.96792	3.15e-08	2.43	7.37e-06	-0.447721	0.63552	-0.305571	0.824144	0.40239	0.751081	-0.10559	0.931203	0.0183019	0.993113	0.162358	0.913931	-1.23668	0.312213	-0.848945	0.393803	-0.906502	0.404608
APA1	AT1G11910	AT1G11910	-0.283884	0.659926	0.532138	0.201728	1.28604	4.08e-05	0.561667	0.133249	0.388773	0.282648	1.34038	1.26e-05	-0.448151	0.299858	-0.40711	0.447548	-0.207186	0.779692	-0.67102	0.0617933	-0.372269	0.425647	-0.0448055	0.963667	-0.442054	0.611299	-0.482764	0.388816	-0.52557	0.382592
KTI1	AT1G73260	AT1G73260	2.14721	0.500856	9.42027	2.56e-08	3.76843	0.0157143	2.58007	0.232804	1.24083	0.56977	-2.28965	0.155623	1.54465	0.601982	0.966326	0.823774	-0.391569	0.927967	1.31117	0.619169	7.31969	3.46e-05	0.162446	0.973736	-0.675882	0.954279	1.87147	0.573567	-3.68094	0.15183
JAZ7	AT2G34600	AT2G34600	1.31161	0.594178	1.87783	0.29187	2.32939	0.0936883	1.62052	0.321724	2.32592	0.0982048	1.27888	0.379246	7.7407	3.43e-10	5.17556	0.000307919	2.42568	0.222025	2.91696	0.0420365	4.00667	0.00641748	0.959819	0.713186	-1.77035	0.626876	3.01779	0.148934	-0.773776	0.793835
PSRP3/1	AT1G68590	AT1G68590	0.432248	0.653329	-0.307754	0.687632	-1.4845	0.00241485	-0.713355	0.222191	0.713131	0.17803	-1.39113	0.00379637	0.429267	0.57409	0.0116879	0.995546	0.0130993	0.995222	0.115947	0.901455	-0.069599	0.950414	-0.493028	0.578611	0.311028	0.860905	0.201278	0.855794	-0.145145	0.907337
AT5G56980	AT5G56980	AT5G56980	0.758631	0.586291	1.1144	0.261618	3.8875	6.16e-08	0.76445	0.433172	0.460703	0.621543	1.58472	0.0382508	5.31972	1.4e-14	3.71451	1.37e-06	2.26329	0.0170854	1.48086	0.0779544	2.72867	0.000679714	2.20456	0.0162719	-0.542995	0.836963	1.55572	0.194029	0.646651	0.683901
AT1G64510	AT1G64510	AT1G64510	0.371919	0.692863	-0.441313	0.506791	-1.91237	2.19e-05	-1.0566	0.0367455	0.231844	0.693077	-2.39454	4.08e-08	0.467476	0.494249	-0.251463	0.818823	-0.457561	0.613061	0.136571	0.869238	-0.44054	0.529391	-0.549666	0.485335	0.548532	0.666642	0.167828	0.877928	-0.0903644	0.942297
AT3G45730	AT3G45730	AT3G45730	0.047382	0.995009	2.72507	0.0140333	2.585	0.00846994	-1.68917	0.135548	-3.64719	0.000116748	-0.479936	0.682509	0.301602	0.897163	0.0220778	0.996137	1.03206	0.576315	-1.73825	0.121205	1.85565	0.126764	1.04954	0.543162	-1.39293	0.590825	-1.83238	0.254778	0.730393	0.72161
RGP2	AT5G15650	AT5G15650	-0.536231	0.463037	-0.754209	0.168484	-0.403523	0.421119	-1.09245	0.0195506	-1.30459	0.0022294	-0.555407	0.229554	1.74287	4.42e-05	0.00354269	1	-0.435308	0.604794	1.66742	0.000113007	0.39823	0.546777	0.149494	0.890319	-0.0284473	0.997969	0.129337	0.90506	-0.251666	0.79448
LOS2	AT2G36530	AT2G36530	-0.107079	0.891612	-0.275605	0.511341	-0.219381	0.528535	-0.289834	0.443117	-0.41169	0.194217	0.315547	0.32189	0.264782	0.555954	-0.00986491	0.991949	0.112076	0.881582	0.550483	0.0933448	0.494934	0.188389	0.123168	0.855693	0.263396	0.773706	-0.352035	0.502858	0.0336142	0.969801
GAE6	AT3G23820	AT3G23820	0.225809	0.872433	-0.626957	0.403949	-1.48086	0.00679514	0.208459	0.812401	0.642249	0.28611	-2.60114	4.18e-07	0.990948	0.126157	0.593955	0.532046	0.40221	0.730196	0.995439	0.103125	0.65427	0.392313	0.985874	0.205785	-0.160529	0.959266	0.146906	0.914916	0.504655	0.6513
AT3G16080	AT3G16080	AT3G16080	0.500003	0.539897	-0.280724	0.695616	-0.540586	0.294451	-0.587183	0.295999	-1.24867	0.0061018	-0.364872	0.482391	0.277956	0.736883	0.452619	0.591281	0.452713	0.613061	0.8979	0.0787883	0.430824	0.535175	0.200284	0.849248	0.662588	0.57879	0.102611	0.93023	0.135919	0.907195
RPL27	AT5G40950	AT5G40950	0.320461	0.690939	-0.413786	0.459782	-1.04919	0.00853216	-0.609773	0.189617	0.196137	0.696479	-1.46624	0.000106636	0.400745	0.491969	-0.0470755	0.969519	-0.0859049	0.940864	0.131798	0.849508	-0.0747037	0.930535	-0.326392	0.668936	0.368257	0.764982	0.0697337	0.948561	-0.0625159	0.954941
CP29	AT3G53460	AT3G53460	0.520534	0.720907	-1.06016	0.241421	-2.33019	0.000644289	-1.26265	0.110667	-2.54593	0.000140033	-0.873128	0.238019	0.0264131	1	-0.0126451	0.997255	0.518617	0.727391	0.356519	0.747394	-0.273165	0.840941	0.443512	0.758185	0.780039	0.690425	0.384827	0.794393	0.587447	0.683901
FUM2	AT5G50950	AT5G50950	-1.90002	0.0272483	-1.15134	0.204709	-0.598483	0.470122	0.588264	0.534077	2.76133	4.03e-05	-0.934172	0.213083	0.710888	0.494265	0.364956	0.829631	0.0763318	0.970373	0.710869	0.440879	0.654529	0.540882	-0.247329	0.887475	0.321654	0.913142	0.581542	0.674127	-0.00473251	0.99876
AT2G19730	AT2G19730	AT2G19730	0.0113443	1	-0.0563532	0.945351	-0.632728	0.182679	-0.523986	0.334479	-0.76947	0.0939732	-0.931668	0.0337081	0.296407	0.696273	0.276039	0.775159	0.214756	0.842201	0.549741	0.309089	0.209866	0.795722	0.0273447	0.985194	0.55538	0.63992	0.0571382	0.962541	0.305037	0.744317
GBSS1	AT1G32900	AT1G32900	1.2536	0.211994	-0.784582	0.424722	-1.67969	0.0195209	0.00161947	1	0.54472	0.51701	-1.43098	0.0446652	0.411041	0.747311	-1.23993	0.21344	-1.64525	0.0892517	0.960843	0.259959	-0.429236	0.724062	0.0496676	0.983438	-0.253383	0.940773	-0.601552	0.660203	-0.178677	0.921772
PSB29	AT2G20890	AT2G20890	-0.228874	0.724112	-0.765403	0.0332638	-1.27384	2.17e-05	-0.691917	0.0399818	0.601259	0.0591434	-1.40599	1.43e-06	-0.0478772	0.957471	-0.60276	0.150573	-0.625659	0.164799	-0.356697	0.357523	-0.603882	0.111234	-0.770825	0.0518581	0.26543	0.786457	0.103335	0.890515	-0.194116	0.774899
GDCH	AT2G35370	AT2G35370	0.235988	0.737731	-0.723794	0.0678676	-1.6528	1.87e-07	-0.301807	0.488803	0.424611	0.243296	-2.55459	4.6e-17	0.160207	0.800181	-0.347571	0.558724	-0.361411	0.557516	-0.273303	0.549832	-0.425303	0.355735	-0.313823	0.605416	0.507179	0.544831	0.314035	0.615453	0.466979	0.451973
AT3G05560	AT3G05560	AT3G05560	0.0869439	0.943352	-0.445661	0.410105	-0.60003	0.154108	-0.80788	0.0619205	-0.842318	0.0341044	-0.334185	0.443449	0.235554	0.736883	0.260583	0.758662	0.086651	0.938799	0.513356	0.28123	0.311602	0.614724	-0.0187592	0.988457	0.589167	0.550275	0.07376	0.944159	0.322744	0.690573
rpl16 ATCG00790	ATCG00790	ATCG00790	1.46842	0.00209382	1.09931	0.0263818	-0.223932	0.674066	0.077872	0.927571	1.14904	0.00677551	-0.142922	0.788657	1.34461	0.00229759	1.4029	0.00366781	0.771445	0.236135	0.689268	0.165355	0.619889	0.282038	0.644165	0.33311	-0.115194	0.964496	-0.0130081	0.991063	0.180764	0.85994
AT5G44580	AT5G44580	AT5G44580	0.2346	0.864499	0.0396893	0.970354	-0.130541	0.85501	-0.719064	0.266261	-1.12544	0.0395401	-2.24747	8.27e-06	-0.0985811	0.947136	-0.787525	0.334982	-0.330457	0.787978	-0.911038	0.138044	-1.08324	0.0960481	-0.608829	0.508203	-0.667962	0.647737	-0.842561	0.358563	-0.623288	0.550784
GSTU19	AT1G78380	AT1G78380	-0.415684	0.657494	0.363986	0.608523	1.11278	0.0208891	-0.029996	0.988256	0.192727	0.756287	1.22736	0.00834319	-0.0164093	1	-0.250735	0.824366	-0.343393	0.737845	-0.176871	0.82873	0.123798	0.900912	-0.576883	0.468627	-0.035381	0.996367	-0.174386	0.875358	-0.777082	0.374293
STR16	AT5G66040	AT5G66040	0.819096	0.350742	0.288497	0.751693	0.753796	0.222739	1.34129	0.0274335	2.33106	1.29e-05	0.258772	0.701999	0.527461	0.536935	0.397472	0.741339	0.363756	0.774177	0.053446	0.979844	0.214177	0.846924	0.00478058	0.998341	-0.462201	0.80246	-0.0714385	0.962824	0.0209818	0.991633
CDSP32	AT1G76080	AT1G76080	0.109301	0.932101	0.261397	0.701172	0.23046	0.66772	0.186842	0.786508	1.36249	0.00130209	-0.486109	0.301814	0.179862	0.839889	-0.144591	0.903494	-0.114605	0.924472	-0.0010958	1	-0.161018	0.850685	0.0879512	0.941714	0.361852	0.798362	0.0797601	0.94631	-0.0078373	0.996272
RPL15	AT3G25920	AT3G25920	0.281195	0.816717	-0.74172	0.275279	-2.91893	3.23e-09	-1.41952	0.00926709	-0.36381	0.559222	-2.899	1.8e-09	0.222661	0.829151	-0.282563	0.817265	-0.475338	0.644554	-0.140293	0.882867	-0.500031	0.51962	-0.448287	0.647778	0.579096	0.689442	0.501624	0.604016	0.197446	0.875032
AT5G02870	AT5G02870	AT5G02870	-0.0811009	0.954896	-0.770711	0.147068	-1.09209	0.011292	-0.905045	0.054339	-0.981447	0.0226445	-0.411156	0.381578	0.086333	0.943004	0.136746	0.909061	-0.0332273	0.980013	0.454011	0.407145	0.202439	0.79735	-0.22971	0.806832	0.601615	0.590825	-0.18779	0.842503	0.202236	0.839738
RPL21C	AT1G35680	AT1G35680	0.188016	0.882377	-0.728541	0.247983	-2.1063	6.49e-06	-1.10826	0.0352939	0.060624	0.933754	-2.43574	8.12e-08	0.372433	0.638644	-0.234384	0.843794	-0.189524	0.877991	0.0955697	0.922541	-0.4519	0.536388	-0.181287	0.877824	0.677434	0.593771	0.462942	0.611226	0.376801	0.707165
AT2G18193	AT2G18193	AT2G18193	0.148512	0.984555	-0.904078	0.669333	-0.274457	0.887822	0.895045	0.681663	-6.88023	2.25e-07	0.6498	0.701091	0.866557	0.75048	-0.534195	0.881516	0.162617	0.969291	0.283075	0.928397	1.86335	0.320693	0.865839	0.769608	-1.56225	0.769195	-2.38389	0.30025	2.01945	0.441098
CAM3	AT3G56800	AT3G56800	0.48773	0.490843	0.378229	0.525818	0.674803	0.124335	0.527485	0.294754	0.401766	0.395831	-0.634275	0.138847	1.61542	7.03e-05	0.664064	0.271927	0.151266	0.88673	1.20689	0.004694	0.667883	0.214306	0.189196	0.839911	-0.175076	0.923121	-0.375197	0.634687	-0.693414	0.362484
AT4G14320	AT4G14320	AT4G14320	0.0498814	0.98161	-0.190426	0.800251	-0.539285	0.286447	-0.270781	0.682483	-0.581346	0.241591	-0.504895	0.302888	0.318069	0.681081	0.143816	0.909786	-0.00310886	0.998141	0.390157	0.526426	0.167526	0.850664	-0.183719	0.862171	0.540882	0.661786	-0.127395	0.91125	0.385981	0.682432
AT1G18540	AT1G18540	AT1G18540	-0.141156	0.913879	-0.585616	0.352535	-0.872108	0.0735535	-0.451979	0.452	-0.726461	0.141505	0.0649972	0.916712	0.287493	0.727849	0.248362	0.821034	0.261379	0.81075	0.629602	0.262259	0.336488	0.657439	0.124787	0.918576	0.647628	0.594401	-0.13821	0.905023	0.427348	0.655068
AT3G60770	AT3G60770	AT3G60770	0.16865	0.851188	-0.347001	0.503049	-0.260129	0.547527	-0.637679	0.124006	-0.951027	0.0083352	-0.352192	0.378378	0.202075	0.761163	0.150181	0.872415	0.206548	0.80805	0.618122	0.136973	0.259107	0.663111	0.0210031	0.986573	0.49713	0.603795	-0.127901	0.883028	0.23484	0.765258
GTR1	AT3G47960	AT3G47960	0.887179	0.175315	-0.158907	0.845106	-0.31753	0.578032	1.0179	0.0491674	1.31328	0.00468231	1.05539	0.0244633	3.40122	2.12e-15	2.17704	6.96e-06	0.846965	0.236637	1.24438	0.0118019	1.07919	0.0508856	1.17048	0.0518581	-0.244141	0.896759	0.833051	0.288549	-0.105919	0.93399
RPL18	AT3G05590	AT3G05590	-0.0515194	0.9766	-0.718655	0.152234	-1.12228	0.00516426	-0.553455	0.251146	-0.521258	0.235707	-0.319263	0.480129	0.127865	0.891374	0.155452	0.8819	-0.00278455	0.998141	0.374768	0.483978	0.0898597	0.916188	-0.127189	0.89949	0.523112	0.625885	-0.272485	0.737844	0.180071	0.849251
AT3G19030	AT3G19030	AT3G19030	1.30334	0.08203	0.610257	0.452522	1.73427	0.00232478	1.53693	0.0120542	1.66674	0.00329322	0.383606	0.562724	1.55293	0.0120562	0.568573	0.590829	1.09992	0.198337	0.748964	0.289434	0.303079	0.769875	0.453057	0.68734	-0.522094	0.772258	-0.251383	0.844882	-0.594824	0.608185
RPS10B	AT5G41520	AT5G41520	0.258774	0.745177	-0.0841163	0.898758	-0.457828	0.267496	-0.147077	0.805007	-0.273053	0.538712	-0.322603	0.435362	0.349396	0.533051	0.29288	0.694594	0.246334	0.765293	0.555668	0.204661	0.323605	0.571938	0.0754804	0.941321	0.397933	0.708354	-0.0352206	0.97273	0.212469	0.796644
AT2G21580	AT2G21580	AT2G21580	0.423461	0.5985	-0.0797888	0.919056	-0.478708	0.326251	0.188934	0.782219	-0.044752	0.946464	0.504841	0.276246	0.360084	0.598269	0.428183	0.587965	0.336385	0.710823	0.781117	0.110095	0.433582	0.499808	0.120558	0.914675	0.555891	0.632106	-0.0911381	0.934966	0.13274	0.903224
GLDP2	AT2G26080	AT2G26080	0.124442	0.891231	-0.822472	0.0389073	-1.31683	7.31e-05	0.114318	0.839177	0.952411	0.00454499	-0.866044	0.0100932	-0.681151	0.0856497	-0.732025	0.0981993	-0.564415	0.291582	-1.36032	5.24e-05	-0.993555	0.00862019	-0.529905	0.309226	-0.0982942	0.961378	-0.225992	0.745731	-0.357041	0.600664
GRP23 AT2G32690	AT2G32690	AT2G32690	0.959758	0.420131	-0.176945	0.891123	-1.46233	0.0538441	-0.335288	0.767482	1.10616	0.155595	-3.80064	3.91e-08	1.15276	0.207709	0.648638	0.642558	-0.174313	0.933289	0.640339	0.516855	0.659469	0.553859	-0.197486	0.917608	0.106832	0.984267	0.117719	0.954122	-1.23257	0.360365
AT4G35750	AT4G35750	AT4G35750	1.81188	0.0450217	3.48281	1.62e-06	2.10343	0.0031586	1.99925	0.00878474	0.725561	0.377554	1.02349	0.1756	0.0501648	0.994048	0.354231	0.840302	0.015896	0.995809	0.236731	0.851661	0.754254	0.476197	1.00014	0.385375	-0.503569	0.844785	-0.530348	0.716786	-1.29316	0.323931
GSTF10	AT2G30870	AT2G30870	-0.286568	0.812504	-0.387373	0.618083	-0.0798471	0.910055	0.355074	0.625736	0.366176	0.555878	0.403323	0.487911	1.82616	0.000419326	0.259	0.835271	-0.172707	0.898964	2.10242	3.43e-05	1.34219	0.0220742	0.634371	0.45988	-0.33895	0.856351	0.352842	0.73552	0.028673	0.987225
AT5G10760	AT5G10760	AT5G10760	0.6659	0.784178	-0.987856	0.526802	-0.92795	0.461044	-0.795376	0.596752	-5.76228	1.25e-08	-2.2982	0.0334563	-0.54537	0.788343	-0.726795	0.756226	0.0039002	0.999601	-1.16192	0.403999	-0.355395	0.869912	-0.356235	0.894075	-2.63621	0.197469	-4.76183	0.000384796	-1.96164	0.317544
JAZ1	AT1G19180	AT1G19180	0.562318	0.793479	0.992019	0.458392	2.15096	0.0255223	1.06856	0.367354	1.36886	0.179622	2.02968	0.0314565	4.84589	6.16e-08	3.54879	0.000517177	1.88846	0.171011	2.90929	0.00266355	3.0413	0.00310067	1.72242	0.20356	-0.216057	0.969999	2.48938	0.0780749	0.541539	0.796644
AT5G46430	AT5G46430	AT5G46430	0.493919	0.552756	0.238475	0.750144	-0.28845	0.606672	0.00144175	1	-0.369232	0.502688	-0.44604	0.383958	0.331077	0.676572	0.371098	0.689219	0.332513	0.740924	0.497291	0.404574	0.408323	0.568394	0.239125	0.816826	0.355184	0.823824	-0.272586	0.779679	0.344547	0.723111
CWLP	AT3G22120	AT3G22120	0.0575482	0.991811	-0.411216	0.792684	-5.11259	1.95e-08	-2.77432	0.00511822	-1.67637	0.0912983	-5.71597	1.36e-10	-0.250296	0.917496	-0.563637	0.794595	-1.28105	0.428245	0.27839	0.869345	0.221338	0.912077	-0.26643	0.913453	0.117034	0.984553	0.152595	0.954179	-0.109222	0.96957
RPL34	AT1G69620	AT1G69620	0.0111217	0.998405	-0.285913	0.539783	-0.70122	0.0334158	-0.601358	0.0970441	-0.807262	0.0117137	-0.967797	0.00186676	0.108422	0.881026	0.13321	0.871848	0.203676	0.779544	0.194253	0.685151	0.0405393	0.956504	0.0596948	0.947297	0.412017	0.632236	0.0379465	0.965846	0.41094	0.505069
PGY2	AT1G33140	AT1G33140	0.658379	0.226725	-0.118626	0.856428	-0.138807	0.774162	0.329652	0.513018	-0.258177	0.573779	0.351126	0.401309	0.475619	0.357682	0.31537	0.671924	0.451497	0.508155	0.822707	0.0452342	0.488421	0.352269	0.28954	0.695573	0.311942	0.802031	-0.421432	0.541945	0.0810322	0.936987
CAX1	AT2G38170	AT2G38170	-0.384053	0.782311	-0.155103	0.887285	0.546298	0.446731	0.204442	0.841882	-0.634087	0.367714	-0.590696	0.386401	-0.393687	0.71998	-0.494218	0.689786	0.105992	0.954423	1.09193	0.120888	-0.0036613	1	-0.0419156	0.984122	-1.31337	0.316839	-1.07911	0.297486	-1.02103	0.371634
CCH	AT3G56240	AT3G56240	0.185773	0.922738	1.33121	0.10295	1.30303	0.060125	2.04308	0.00315479	3.65691	3.57e-09	0.704071	0.332436	0.773769	0.409488	0.705746	0.554783	0.37381	0.811818	-0.12065	0.932837	1.476	0.0626733	0.350534	0.812809	-0.471746	0.839695	0.134418	0.939473	-1.11405	0.367494
AT1G15930	AT1G15930	AT1G15930	0.221574	0.837644	-0.626375	0.291998	-0.809891	0.0857448	-0.692861	0.188357	-1.34757	0.00216038	-1.02207	0.0219918	-0.0354949	0.989258	-0.19251	0.865144	0.095715	0.941788	0.196111	0.794726	-0.198527	0.815233	-0.370706	0.667528	0.494387	0.696763	-0.284326	0.758624	0.0839777	0.945073
PIP2B	AT2G37170	AT2G37170	-0.509168	0.645461	0.312899	0.729694	1.87232	0.000759995	-0.917199	0.166279	-1.64161	0.00339198	-1.85746	0.000694384	-0.501647	0.570401	-0.165124	0.920495	-1.14398	0.16817	-0.346713	0.682833	-0.512345	0.556714	-0.857483	0.331072	-1.0558	0.419466	0.0342985	0.983038	-0.986389	0.345164
AT1G05340	AT1G05340	AT1G05340	1.12734	0.601387	4.92162	3.05e-05	4.85355	7.8e-06	2.26012	0.079314	0.786531	0.571124	5.90245	2.1e-08	2.11394	0.124379	1.5507	0.389337	1.20899	0.569739	0.886999	0.585033	2.72782	0.0394752	1.58179	0.384517	-1.86517	0.542587	-0.213063	0.946166	-1.44491	0.513807
AT2G43030	AT2G43030	AT2G43030	0.38927	0.644617	-0.492836	0.415373	-1.91859	4.83e-06	-0.732791	0.143084	-0.0120869	0.993537	-1.75251	2.23e-05	0.636309	0.25715	0.251402	0.803169	0.112245	0.925971	0.41719	0.468926	-0.0507712	0.960685	0.160057	0.880682	0.490986	0.686642	0.560029	0.465269	0.35441	0.694036
AT1G52220	AT1G52220	AT1G52220	0.26438	0.778123	0.00632757	0.995064	-0.840795	0.0540316	0.0780598	0.924422	1.38873	0.000630265	-1.9412	9.23e-07	0.955929	0.0417572	0.325026	0.702885	0.120568	0.915619	0.644541	0.18932	0.309505	0.650335	-0.0292042	0.983534	0.261534	0.862397	0.405797	0.607294	0.0263682	0.98605
rps18	ATCG00650	ATCG00650	2.17684	3.77e-09	0.689429	0.143365	0.0724731	0.88809	1.40653	0.000214331	1.60553	6.95e-06	0.6455	0.0976818	1.96169	3.7e-08	1.27572	0.00245277	1.23022	0.00692359	1.46939	8.46e-05	1.06263	0.0117976	1.11398	0.0142508	0.230225	0.867255	0.244463	0.75395	0.262886	0.746785
ACR11	AT1G16880	AT1G16880	-0.0940063	0.938462	-0.0590789	0.934531	-0.478246	0.273988	-0.522127	0.270938	0.681143	0.098503	-1.37475	0.000258865	0.0434815	0.977024	-0.309718	0.695429	-0.17047	0.861578	-0.381786	0.460965	-0.462077	0.406468	-0.38734	0.586145	-0.0363118	0.992381	-0.0966873	0.922642	-0.508281	0.499397
AT1G52720	AT1G52720	AT1G52720	0.226358	0.880018	1.55336	0.0166634	1.78907	0.00130419	0.6989	0.319103	1.45918	0.010065	0.514794	0.413908	5.19708	3.17e-24	2.78929	1.38e-06	0.627762	0.550192	4.42683	1.46e-17	3.41534	5.51e-10	1.83275	0.00535251	-0.437745	0.825228	1.03786	0.271332	-0.215274	0.877459
DFR	AT5G42800	AT5G42800	3.60737	0.290174	0.960651	0.728361	0.816835	0.698934	7.00551	0.00210005	6.89814	2.31e-05	6.82374	1.89e-05	3.93911	0.150529	-1.09107	0.785967	-0.608541	0.8899	5.07905	0.0334278	1.82678	0.467714	0.207707	0.968969	2.9195	0.640928	3.08301	0.27803	1.45869	0.678708
ROC5	AT4G34870	AT4G34870	-0.258673	0.587574	-0.500474	0.115465	-0.301157	0.299926	-0.112339	0.784397	-0.28318	0.330564	0.264343	0.35054	-0.0145533	0.999477	-0.229043	0.644326	-0.269346	0.583701	0.28831	0.380637	-0.113009	0.818284	-0.0693378	0.918826	0.163469	0.860934	-0.303654	0.514135	0.0819693	0.90094
AT3G56290	AT3G56290	AT3G56290	1.74191	0.00015159	0.949805	0.066675	2.38531	4.99e-09	0.313866	0.603356	0.547632	0.251682	0.189429	0.718126	-0.288984	0.703964	-0.561893	0.420945	0.00708172	0.996576	-0.773097	0.116903	-0.514008	0.403233	0.301444	0.727981	-0.0850491	0.976098	-0.427085	0.599099	-0.589716	0.474309
AT5G57290	AT5G57290	AT5G57290	0.859916	0.116859	0.50555	0.367068	0.287476	0.55829	0.17221	0.792287	-0.0271553	0.969047	0.275386	0.559686	1.15165	0.00831411	0.912037	0.0825107	0.709242	0.26277	1.32194	0.00158197	1.10312	0.0173898	0.573195	0.383229	0.580007	0.590825	-0.0830964	0.938935	0.242997	0.789329
PRXCB	AT3G49120	AT3G49120	-0.983624	0.202218	0.639141	0.389809	0.975362	0.0853583	-1.38226	0.0175331	-1.60073	0.00265961	0.824557	0.141516	0.633566	0.404349	0.113235	0.946292	-0.647064	0.506338	0.649109	0.337804	0.868599	0.219707	0.284888	0.812018	-0.748497	0.60015	-0.130075	0.924622	-1.36074	0.119459
rps2	ATCG00160	ATCG00160	1.67481	0.00011349	0.625598	0.242439	-0.409313	0.384873	1.22384	0.00426772	1.40124	0.000413836	0.102021	0.846536	1.93842	8.16e-07	1.52817	0.000594086	0.64498	0.328706	1.83423	4.27e-06	1.08283	0.0202019	0.950344	0.0781303	0.0829454	0.974888	-0.419054	0.584193	-0.680825	0.372107
PDX1.1	AT2G38230	AT2G38230	1.03281	0.0347794	0.0738295	0.918647	-0.443221	0.322989	0.352429	0.502286	0.796058	0.0511537	-1.43729	0.000163155	0.210384	0.775248	-0.157131	0.879358	-0.178447	0.858196	-0.325286	0.553141	-0.660135	0.1986	-0.100894	0.924251	0.0342462	0.994491	-0.289646	0.71821	-0.287206	0.73203
SIB1	AT3G56710	AT3G56710	0.346874	0.895343	0.120212	0.947978	1.18796	0.273154	-0.871568	0.500146	-2.34393	0.0169916	0.431972	0.712957	-0.829771	0.589494	-0.480793	0.83987	0.946288	0.619617	-1.14193	0.352669	1.29307	0.336557	-0.0557901	0.986874	-2.11458	0.303331	-2.05551	0.182123	-0.877916	0.664563
AT4G31985	AT4G31985	AT4G31985	0.637123	0.223041	0.108064	0.864236	0.0206891	0.96971	0.0135591	1	-0.342666	0.414647	-0.0226976	0.965478	0.843439	0.0383188	0.523761	0.348783	0.479837	0.444798	0.914826	0.0178062	0.593715	0.209203	0.26625	0.710742	0.747821	0.337834	0.346892	0.612718	0.510538	0.454022
AT2G43460	AT2G43460	AT2G43460	0.800729	0.15183	0.0322637	0.967692	-0.179249	0.725938	0.121515	0.858646	-0.230505	0.649327	-0.0555491	0.919306	1.01772	0.0228172	0.68037	0.248284	0.644115	0.324438	1.05712	0.0141138	0.697816	0.182342	0.376106	0.619908	0.611765	0.556068	0.161972	0.860464	0.43863	0.588852
RAN-1	AT5G20010	AT5G20010	0.314766	0.702466	-0.407606	0.473291	0.592744	0.171666	-0.0468583	0.963841	-1.2105	0.00202925	0.492063	0.25018	0.849501	0.0645626	-0.448039	0.51842	0.196418	0.842784	0.442011	0.387	-0.826482	0.0877425	0.403499	0.575924	-0.031619	0.995671	-0.921524	0.139031	-0.178554	0.851443
AT5G45775	AT5G45775	AT5G45775	0.122636	0.928964	-0.349819	0.624512	-1.15249	0.016869	-0.791147	0.149212	-1.55377	0.000749466	-0.798328	0.10213	0.0244652	1	0.0888868	0.953038	-0.0209569	0.990247	0.568807	0.337206	0.100741	0.920536	-0.172641	0.882129	0.509651	0.708133	-0.10609	0.930087	0.36724	0.709863
AT5G62300	AT5G62300	AT5G62300	0.645054	0.211063	0.168153	0.777621	-0.0480113	0.923551	-0.0747422	0.912367	-0.426987	0.288271	-0.34502	0.388054	0.546613	0.237776	0.616249	0.234061	0.599847	0.289489	0.794447	0.0426622	0.657231	0.148474	0.334149	0.618349	0.39826	0.697201	0.0340166	0.973007	0.323305	0.667091
PFN2	AT4G29350	AT4G29350	0.0946661	0.90568	-0.0865269	0.86233	0.743704	0.0099363	0.0730673	0.883595	0.225816	0.508542	0.574409	0.0474954	0.067811	0.930565	-0.164906	0.805506	0.0530492	0.950365	-0.173832	0.686004	-0.0409186	0.950304	-0.231928	0.67699	-0.0687218	0.967813	-0.403057	0.420883	-0.365197	0.510785
AT3G06700	AT3G06700	AT3G06700	0.270878	0.736828	-0.325962	0.557441	-0.346469	0.430183	-0.433179	0.361116	-0.419118	0.325263	-0.165704	0.717488	0.514016	0.307106	0.40396	0.548743	0.15541	0.872112	0.610021	0.165964	0.547413	0.282506	-0.0163937	0.989434	0.503097	0.618977	-0.0376629	0.971648	0.134703	0.885435
AT1G57720	AT1G57720	AT1G57720	-0.141067	0.837644	-0.221798	0.601949	-0.655439	0.0245684	-0.564813	0.0767298	-1.43767	6.34e-08	-1.18272	1.15e-05	-0.354658	0.364556	-0.289161	0.574928	-0.451091	0.322244	-0.252877	0.512321	-0.399015	0.301148	-0.600968	0.122888	0.26066	0.770323	0.0117809	0.987549	0.127254	0.850394
AT3G47650	AT3G47650	AT3G47650	0.0758057	0.949438	-0.664111	0.150968	-1.43591	6.18e-05	-0.707565	0.0882098	-0.203199	0.659233	-1.67353	1.51e-06	0.160648	0.827067	-0.235184	0.772719	-0.267154	0.737845	-0.143015	0.820479	-0.445026	0.393582	-0.347066	0.609539	0.498798	0.611998	0.292475	0.690298	0.249127	0.753782
AT5G56710	AT5G56710	AT5G56710	0.384012	0.580983	-0.178972	0.774191	-0.814512	0.0375806	-0.636458	0.14614	-0.673171	0.0909315	-0.607114	0.122798	0.34862	0.546939	0.404695	0.548642	0.151794	0.875971	0.673542	0.117999	0.381075	0.499697	0.0208102	0.987593	0.620335	0.510712	0.0461944	0.964526	0.33592	0.669926
AT1G32470	AT1G32470	AT1G32470	0.197561	0.841147	-0.655463	0.208883	-2.46155	1.89e-10	-0.810358	0.0736657	0.372963	0.426909	-3.48727	1.75e-20	0.184791	0.816712	-0.327225	0.686247	-0.498467	0.491516	-0.279578	0.632477	-0.630207	0.240421	-0.518803	0.43833	0.541528	0.615162	0.442625	0.551239	0.394861	0.630814
AT1G08360	AT1G08360	AT1G08360	-0.112421	0.91762	-0.486653	0.34701	-0.953867	0.0138057	-0.596316	0.183688	-1.3082	0.000404039	-1.38366	0.000152896	-0.205403	0.772406	-0.187274	0.841058	-0.290261	0.720347	-0.031872	0.985768	-0.267082	0.672146	-0.344026	0.631941	0.445111	0.671426	-0.0568344	0.957623	0.16775	0.85391
GSR2	AT1G66200	AT1G66200	0.0564882	0.971803	0.358897	0.539473	0.532312	0.227768	-0.800572	0.0746457	0.308558	0.520021	0.413639	0.346203	-0.473017	0.400058	-0.522933	0.417709	-0.343772	0.67388	-1.23624	0.00271576	-0.806409	0.100209	-0.152295	0.875765	-0.248512	0.863803	-0.58505	0.39706	-0.711632	0.332275
emb2394	AT1G05190	AT1G05190	0.74356	0.151658	0.0785138	0.907685	-1.14724	0.00240181	-0.277491	0.598147	0.448334	0.287388	-1.9696	3.36e-08	0.71428	0.112048	0.474349	0.445622	0.240224	0.780644	0.405101	0.405705	0.000974044	1	0.304782	0.678417	0.529296	0.594401	0.554168	0.39548	0.460107	0.533693
AT2G23090	AT2G23090	AT2G23090	0.898423	0.000398019	1.06651	9.38e-06	1.42	1.12e-10	1.20205	1.52e-07	1.06519	1.49e-06	1.01978	3.84e-06	0.787012	0.00101435	0.670655	0.0154332	0.670485	0.0241079	0.616454	0.0128606	0.770009	0.00252622	0.610333	0.0384634	-0.0312626	0.984395	-0.00159449	0.999866	-0.00756825	0.99244
BZIP60	AT1G42990	AT1G42990	0.127814	0.958899	0.0812911	0.952424	0.932925	0.235571	-0.113826	0.9409	-0.907247	0.248464	0.637925	0.421194	0.244527	0.879233	-0.110665	0.961616	0.343196	0.845591	-0.923076	0.294361	1.97219	0.013698	0.100379	0.962642	-0.959586	0.614595	-0.973488	0.436355	-0.386155	0.81092
SVB	AT1G56580	AT1G56580	-0.135728	0.951265	-0.722139	0.446834	-1.68928	0.0138153	-0.116303	0.93263	1.61105	0.0174706	-1.18652	0.0865882	0.933753	0.293182	0.708644	0.55676	-0.570302	0.678502	0.798915	0.344062	0.967998	0.286504	0.571834	0.658025	0.225072	0.948403	1.17264	0.298291	0.909952	0.476997
IAR3	AT1G51760	AT1G51760	-1.21371	0.16934	0.798769	0.343159	0.65908	0.35064	-0.657533	0.414951	-2.17883	0.000316207	-0.594005	0.38849	4.441	9.07e-15	1.10048	0.210688	-0.275588	0.859891	3.58946	1.15e-09	2.06238	0.00222454	0.757297	0.46891	-1.03659	0.509243	0.581003	0.624892	-0.797982	0.508455
AT4G33865	AT4G33865	AT4G33865	0.679809	0.165932	0.202141	0.719897	0.292104	0.482704	-0.0217428	0.988931	-0.286284	0.49443	-0.0453667	0.924435	0.657871	0.118973	0.528625	0.325114	0.501242	0.401624	0.668448	0.0924852	0.459953	0.349056	0.150648	0.854135	0.694487	0.374581	0.351974	0.594196	0.492144	0.459629
AT1G29660	AT1G29660	AT1G29660	-0.173721	0.94776	-2.05819	0.0326645	-5.62147	1.59e-12	-3.52891	1.86e-05	-2.97312	0.000198473	-6.98055	1.43e-18	-1.89413	0.0420591	-0.623284	0.714272	-0.946465	0.535048	-2.2009	0.0117185	-1.9321	0.0463391	-2.07555	0.0499854	-0.0216255	1	-0.00627252	0.999824	0.520835	0.774503
CSLA01	AT4G16590	AT4G16590	-3.5021	0.0119417	-2.5971	0.0816644	0.370978	0.82578	0.358556	0.848268	3.17084	0.00460369	0.666629	0.650357	3.21939	0.0068144	2.45814	0.0937683	1.32777	0.5574	5.27206	1.26e-06	5.37876	2.58e-06	5.90555	1.21e-06	1.29361	0.680332	2.55459	0.149796	1.21988	0.622239
TBL26	AT4G01080	AT4G01080	-0.189682	0.931633	-2.23538	0.00847416	-2.23028	0.00363597	-0.8493	0.367322	-0.181852	0.863782	-2.58122	0.000485315	1.53497	0.0769962	0.211227	0.922554	-0.669506	0.660302	2.29093	0.00293622	1.6083	0.0736745	1.82762	0.0591037	-0.289738	0.934258	-0.383635	0.811149	-0.290156	0.874278
FLA8	AT2G45470	AT2G45470	0.156399	0.953453	-0.737443	0.52348	-4.00993	3.73e-07	-1.48518	0.100803	0.40099	0.692133	-4.10038	8.88e-08	0.276014	0.877449	0.668382	0.671193	0.0518699	0.984525	0.388098	0.764618	0.390677	0.791199	0.476453	0.779626	0.731896	0.770323	0.825793	0.577702	0.837966	0.599997
ACO2 AT1G62380	AT1G62380	AT1G62380	-0.943669	0.211232	-0.10474	0.913003	-0.691743	0.236132	-3.36188	2.43e-11	-1.12323	0.038099	-0.85689	0.117436	-1.15011	0.0564785	-0.810772	0.30897	-0.836402	0.324212	-0.949571	0.113645	-0.134414	0.903605	0.210268	0.866542	-0.857189	0.512958	-0.213269	0.858599	0.159608	0.904992
AT5G54170	AT5G54170	AT5G54170	-0.0241448	0.997071	-0.0824441	0.942171	0.729559	0.286458	-0.529249	0.518715	-0.531931	0.459274	-0.643099	0.337824	3.87381	7.48e-12	1.90978	0.00644167	0.194198	0.904492	1.54336	0.0175122	1.86565	0.00556591	0.980158	0.290195	-0.755287	0.654714	0.407561	0.745186	-0.642423	0.601348
PIP1C	AT1G01620	AT1G01620	0.472297	0.652281	0.91955	0.174229	0.477668	0.442723	-1.00374	0.0973451	0.962862	0.0864406	-1.50072	0.00424752	-0.586405	0.446527	0.0183511	0.991932	0.257437	0.845682	-1.17791	0.0425092	-1.02631	0.122325	-1.19676	0.0944869	-0.287819	0.890255	0.0864724	0.954188	-0.143139	0.917175
PLAT1	AT4G39730	AT4G39730	-0.577678	0.306435	-0.52188	0.293238	0.336883	0.435984	1.58282	1.78e-05	2.14391	4.73e-10	1.17046	0.00110681	-0.198148	0.774738	-0.32627	0.649735	-0.26476	0.74553	0.0386898	0.974833	0.200354	0.763382	-0.246554	0.746877	-0.0710238	0.976459	-0.0038978	0.998605	-0.0425781	0.970176
JR1	AT3G16470	AT3G16470	0.193496	0.915687	0.412056	0.680505	-2.82485	8.08e-06	2.09146	0.00162533	1.2658	0.0568745	-0.756205	0.274011	3.09835	4.82e-07	1.55321	0.0523237	-0.569366	0.661354	4.73171	1.42e-15	3.13316	1.23e-06	1.98904	0.00861938	-0.0409579	0.998159	1.32149	0.194703	0.597675	0.650849
PEN3 AT1G59870	AT1G59870	AT1G59870	-0.469527	0.77162	-0.125304	0.925185	-0.0832797	0.935147	-2.01769	0.00899783	-2.82459	5.17e-05	-0.128128	0.89386	2.17216	0.00432068	0.632788	0.653262	-0.0437725	0.985999	0.500866	0.63339	1.03413	0.292981	-0.0745028	0.974372	-1.03052	0.590825	-0.283985	0.864235	-0.194643	0.917175
AXS2	AT1G08200	AT1G08200	-0.651765	0.228329	-0.830419	0.064915	-1.10725	0.00325167	-0.193911	0.735346	0.664599	0.0910252	-1.29961	0.000336814	1.24839	0.00106719	0.48304	0.424614	-0.240536	0.777635	0.99164	0.0118663	0.85408	0.0528844	0.842171	0.0907527	0.0509701	0.984395	0.670535	0.280529	0.461204	0.52734
psbJ	ATCG00550	ATCG00550	-0.660655	0.156972	-1.18583	0.001269	-1.26247	0.000134216	-0.787462	0.0330454	-0.424668	0.25688	-2.08048	3.69e-11	-0.42479	0.360059	-0.762982	0.0781805	-1.01288	0.0171413	-0.579931	0.136164	-0.878675	0.0232133	-1.11181	0.00495181	-0.0726943	0.972812	0.123249	0.877356	-0.142679	0.860264
LEA14	AT1G01470	AT1G01470	-0.00160179	1	1.13275	0.155482	1.5739	0.014206	2.06143	0.00165974	2.59235	1.82e-05	0.631197	0.365982	2.70236	1.29e-05	1.19397	0.173589	0.0416612	0.98433	1.87126	0.00448732	1.33869	0.0802684	-0.0875582	0.963608	-0.402656	0.860934	0.291283	0.837172	-0.791005	0.520653
KCS6	AT1G68530	AT1G68530	0.102395	0.952714	-0.927544	0.152126	-1.85098	0.0002485	0.430857	0.534363	1.38692	0.00673385	-0.65076	0.236766	-1.08764	0.0669082	-0.376992	0.726962	-0.638894	0.485797	-1.05554	0.0637211	-0.546134	0.47079	-0.929364	0.21383	-1.27886	0.178982	-0.755931	0.395433	-0.812812	0.400824
AT5G51110	AT5G51110	AT5G51110	-0.437473	0.473119	-1.02257	0.0122824	-1.58129	5.72e-06	-0.625987	0.128938	0.23735	0.589188	-1.95714	6.7e-09	-0.26031	0.670393	-0.762735	0.106551	-0.723895	0.170739	-0.488167	0.263246	-1.09073	0.0060269	-0.920569	0.0447125	0.401026	0.693293	-0.0413111	0.96727	-0.0768116	0.937227
AT5G47210	AT5G47210	AT5G47210	0.00429143	1	-0.510254	0.216538	-0.768112	0.0193561	-0.225229	0.617397	-0.240311	0.530688	0.0852217	0.83449	0.309293	0.519636	0.223102	0.745928	0.305541	0.628535	0.563368	0.122736	0.229006	0.66321	0.200536	0.76577	0.506685	0.53022	-0.340946	0.564556	0.193371	0.784567
TDT	AT5G47560	AT5G47560	-0.475697	0.747281	0.778867	0.413675	1.74286	0.0115778	1.06577	0.184845	1.59571	0.0212081	1.53845	0.0242589	-2.08512	0.0035685	-2.09336	0.00834681	-0.879202	0.463069	-2.72533	6.14e-05	-2.15843	0.00408595	-0.577323	0.661598	-1.44081	0.330243	-1.43752	0.185314	-2.04278	0.0496149
RSR4	AT5G01410	AT5G01410	0.262205	0.710171	-0.693365	0.09559	-0.515249	0.163362	0.00229798	1	-0.11581	0.800651	-0.861412	0.0106852	-0.107443	0.893516	-0.10612	0.913195	-0.058145	0.954902	-0.107999	0.857423	-0.0606024	0.935011	0.0352643	0.974372	0.0272149	0.995437	-0.0279106	0.977717	0.170318	0.828437
CAF1a	AT3G44260	AT3G44260	1.40456	0.364709	0.672041	0.656618	1.53682	0.151785	1.14084	0.3526	2.52816	0.0100295	0.508929	0.668968	2.56909	0.0159088	0.770531	0.699526	4.03027	0.000218291	1.59147	0.163774	1.32426	0.328803	1.96661	0.156074	-0.131904	0.984395	-0.259932	0.917265	2.38615	0.145713
AT3G56340	AT3G56340	AT3G56340	0.114077	0.915361	-0.500209	0.330167	-0.664424	0.101492	-0.826203	0.0498089	-0.839401	0.0306469	-0.711271	0.0680321	0.199676	0.778471	0.221005	0.802533	0.203371	0.8248	0.447297	0.351138	0.218583	0.743808	-0.0866521	0.932967	0.546208	0.582963	-0.102588	0.916027	0.303547	0.702377
NIR1	AT2G15620	AT2G15620	-0.877311	0.26901	-0.923269	0.174723	-0.0279175	0.972523	-0.471434	0.509027	0.357465	0.584693	-0.842855	0.133268	0.50264	0.537404	-0.253276	0.850048	-0.0584632	0.970268	0.430029	0.564478	-0.72772	0.323972	0.377978	0.724785	0.070918	0.984395	-0.147337	0.913965	0.464409	0.678823
CNI1	AT5G27420	AT5G27420	-0.844641	0.730037	0.824007	0.637768	1.7291	0.164032	-1.13321	0.448154	-2.16865	0.0722333	0.761376	0.565739	-1.46396	0.354569	-0.258879	0.941836	0.914992	0.703235	-2.86731	0.0207993	3.5493	0.00490201	0.382096	0.893661	-3.13965	0.124284	-1.55181	0.445255	-0.529889	0.84534
GAE1	AT4G30440	AT4G30440	1.00378	0.017623	0.421648	0.388673	0.394588	0.326349	0.935417	0.0129681	2.13214	7.05e-11	-0.203485	0.627697	1.06795	0.00380163	1.00097	0.0171197	1.39739	0.000417981	0.294707	0.54561	0.34714	0.515525	0.449401	0.445947	-0.108539	0.957056	-0.108358	0.9029	0.153357	0.857721
EMB3119	AT3G04790	AT3G04790	0.270814	0.762483	-0.546156	0.319101	-1.03846	0.0122248	-0.351297	0.518741	0.418169	0.367924	-1.40305	0.000362359	0.380607	0.538774	-0.0852969	0.946292	-0.0985691	0.932499	0.148694	0.832473	-0.0957414	0.912017	-0.194817	0.831941	0.406057	0.740737	0.0844961	0.937158	-0.0265041	0.985693
AT3G53890	AT3G53890	AT3G53890	0.290907	0.692863	0.192186	0.739772	0.164888	0.7157	-0.552725	0.195405	-0.778236	0.0350766	-0.389149	0.323693	0.573477	0.207725	0.63592	0.213285	0.277594	0.716639	0.726083	0.0693399	0.565314	0.235817	0.0155417	0.989434	0.536097	0.560521	0.316259	0.650602	0.240964	0.757472
AT5G28060	AT5G28060	AT5G28060	0.637301	0.276654	0.37883	0.502272	-0.161405	0.746156	-0.104897	0.8768	-0.230441	0.637922	-0.668213	0.100557	0.53088	0.314336	0.726623	0.185105	0.656226	0.288292	0.65598	0.15095	0.622003	0.231743	0.357238	0.628969	0.435643	0.696763	0.264939	0.742066	0.352993	0.667091
AT2G31610	AT2G31610	AT2G31610	-0.382201	0.584524	-1.08126	0.0117992	-1.25476	0.000826373	-1.21881	0.00192074	-1.43212	8.43e-05	-0.803056	0.0356932	-0.480552	0.354569	-0.428713	0.51389	-0.36185	0.629048	-0.014774	1	-0.269028	0.666971	-0.460113	0.473146	0.453846	0.661978	-0.273547	0.722135	0.112614	0.906881
ALDH11A3	AT2G24270	AT2G24270	-0.19064	0.784151	-0.67254	0.0695086	-2.1848	8.43e-14	0.271231	0.509456	0.30915	0.38156	-0.849822	0.00505231	-0.705327	0.0429126	-0.449181	0.343699	-0.684377	0.1132	-1.208	8.52e-05	-0.872341	0.0117195	-0.742793	0.0640046	-0.0934335	0.958849	0.185319	0.773753	0.146209	0.840929
SAG20	AT3G10985	AT3G10985	0.316088	0.843104	2.10666	0.00333954	1.77183	0.00659577	0.0736239	0.966213	-0.0776894	0.937986	-0.519883	0.480183	2.22229	0.000809922	1.56394	0.0553472	0.473806	0.737531	1.37994	0.0537783	1.91587	0.00821625	0.759175	0.496385	-0.0159093	1	0.845525	0.463394	-0.321865	0.831444
AT4G34150	AT4G34150	AT4G34150	0.353655	0.827021	0.150251	0.902046	0.431946	0.598391	-0.430632	0.662336	-0.352338	0.681668	-0.448645	0.5681	1.07896	0.209105	0.443237	0.76743	0.0954734	0.961751	-1.10011	0.165969	-0.36817	0.763074	-0.342814	0.822224	-0.706774	0.725247	0.0444828	0.981144	-0.587739	0.679291
SNG1	AT2G22990	AT2G22990	-0.664185	0.185862	-0.203973	0.720906	-1.01661	0.00452782	-1.54487	1.31e-05	-0.152289	0.743901	-2.21334	2.85e-11	-0.586155	0.187182	-1.23915	0.00184428	-0.711513	0.176411	-1.02063	0.00607958	-1.20695	0.00183629	-1.55655	5.14e-05	-0.0469947	0.984395	-0.262781	0.717437	-0.806058	0.189722
AT5G08050	AT5G08050	AT5G08050	0.203869	0.84234	-0.45556	0.442065	-1.88172	4.11e-06	-1.27764	0.0035189	-0.0717069	0.906795	-2.20015	3e-08	0.206329	0.796501	-0.485398	0.50089	-0.392452	0.640445	-0.178125	0.8019	-0.715295	0.187074	-0.690366	0.27687	0.387458	0.76753	0.0669778	0.954659	-0.0620323	0.958818
LDOX	AT4G22880	AT4G22880	2.49923	0.429662	1.69238	0.463158	0.557334	0.78162	6.43653	0.000665018	7.47126	7.43e-07	6.70839	5.22e-06	1.40334	0.678932	0.826128	0.834285	-0.351117	0.938473	4.14087	0.0401876	3.04662	0.127413	-0.245348	0.957662	1.29838	0.857251	4.2496	0.0760899	1.59018	0.614777
PRXQ	AT3G26060	AT3G26060	-0.586962	0.537886	-1.37715	0.0277454	-3.23495	6.38e-10	-1.8646	0.000692202	0.0939229	0.904283	-2.62749	2.72e-07	-0.454487	0.591663	-1.19635	0.0834332	-0.968046	0.239465	-0.887149	0.154271	-1.07686	0.101765	-1.19515	0.0979381	0.549616	0.729505	0.212955	0.860915	0.331992	0.780232
AT1G21520	AT1G21520	AT1G21520	-0.127019	0.965662	0.197366	0.888763	2.27198	0.00421207	-2.44518	0.00421739	-6.15166	6.76e-17	-1.37366	0.0944666	-0.240882	0.901257	-0.992008	0.451288	0.0682123	0.97779	-0.636559	0.571162	-1.05798	0.337759	-0.877616	0.528779	-1.17309	0.576963	-1.90109	0.120104	0.378438	0.840341
WRKY18	AT4G31800	AT4G31800	0.19961	0.957397	0.118451	0.954258	1.04896	0.397645	-1.21546	0.381534	-2.89438	0.00762735	-1.85647	0.0960718	6.32127	4.68e-10	2.38863	0.0864519	0.609393	0.811172	1.09641	0.442938	1.11327	0.487535	0.297678	0.916362	-0.535329	0.904067	1.12537	0.575701	-1.313	0.535106
AT3G29240	AT3G29240	AT3G29240	-0.740703	0.530664	-0.168196	0.887057	-0.895537	0.2225	-1.40235	0.0585309	-1.3243	0.0550416	-2.59356	4.39e-05	-1.82626	0.0108618	-1.81629	0.0233372	-1.97464	0.0184742	-2.4985	0.000190519	-2.25888	0.00174745	-1.50276	0.0905732	-0.220377	0.948513	-1.43434	0.171289	-1.98208	0.0501078
AT5G13210	AT5G13210	AT5G13210	0.686316	0.829469	-0.382193	0.864909	0.244618	0.890726	-0.525816	0.810471	-5.34955	2.03e-05	1.25107	0.385894	1.47516	0.438031	-0.0922373	0.98255	0.618404	0.850105	0.601662	0.786847	2.17131	0.194583	0.976898	0.704066	-1.00714	0.832656	-2.92202	0.151794	0.978516	0.720868
FLA2	AT4G12730	AT4G12730	0.195289	0.939961	-0.580198	0.647843	-3.08486	0.000200138	-1.62248	0.0812386	-0.0991429	0.937628	-4.13596	3.32e-07	1.01115	0.3773	1.34522	0.267404	1.06835	0.459786	1.10052	0.276293	1.22852	0.268577	1.27982	0.313629	0.567902	0.847397	0.749673	0.637541	1.15408	0.458918
SIP2	AT3G57520	AT3G57520	0.0300676	0.998405	1.07876	0.329772	1.25888	0.154282	2.62227	0.00203493	3.01626	0.000131509	4.45783	4.33e-09	1.3192	0.201122	1.03716	0.440751	0.0345009	0.990809	1.78368	0.0462352	1.3936	0.188012	0.450856	0.803187	-0.588948	0.837749	0.667126	0.681707	-0.83267	0.616315
AT4G40030	AT4G40030	AT4G40030	0.373219	0.186671	0.14008	0.649509	0.278756	0.2062	0.391181	0.0829211	0.757673	8.21e-05	0.295125	0.161619	0.112711	0.759986	0.0658984	0.905823	0.0783337	0.879188	0.215318	0.404813	0.0899708	0.812761	0.188915	0.610132	0.0970429	0.905376	-0.132847	0.748146	-0.271887	0.478764
AT1G41880	AT1G41880	AT1G41880	0.0233131	0.991758	-0.725911	0.118268	-0.838407	0.0305309	-0.682941	0.111065	-0.658473	0.0965326	-0.36364	0.381994	0.158897	0.835346	0.254338	0.755064	0.0312471	0.978626	0.470708	0.312833	0.186833	0.788128	-0.120122	0.898762	0.571173	0.548782	0.0346592	0.973944	0.299942	0.701526
AT2G01250	AT2G01250	AT2G01250	0.0979683	0.928146	-0.2532	0.661091	-0.561062	0.168314	-0.616089	0.157754	-0.558144	0.167057	-0.734297	0.0542816	0.36992	0.507717	0.244376	0.767048	0.269378	0.740849	0.61283	0.159361	0.285668	0.637858	0.186003	0.82443	0.60104	0.520864	0.0532861	0.959613	0.302957	0.697677
ATAF2	AT5G08790	AT5G08790	0.643628	0.732497	0.890337	0.479612	1.42776	0.131058	0.206175	0.896768	-1.62552	0.0796276	0.165549	0.887435	1.47071	0.181304	0.0328677	0.990899	0.437501	0.841103	0.499676	0.714467	2.47049	0.0127177	0.248048	0.914449	-0.398168	0.915112	-0.632419	0.724633	-0.520911	0.791375
AT5G19760	AT5G19760	AT5G19760	0.118416	0.851916	-0.287066	0.420343	-0.753189	0.00322825	-0.356097	0.246449	-0.221863	0.457076	-0.845111	0.000626483	0.350008	0.300338	0.0523414	0.947837	-0.138758	0.820422	0.319065	0.312686	-0.0492343	0.928678	-0.0458597	0.94961	0.359544	0.591711	0.351345	0.429695	0.0975426	0.876124
ACBP6	AT1G31812	AT1G31812	0.664264	0.160503	0.270994	0.597767	0.458159	0.224838	0.73205	0.0536191	1.17674	0.000393514	-0.000211055	1	0.559922	0.190743	0.165577	0.845431	0.177439	0.832362	0.210178	0.681379	0.134331	0.842001	0.0779674	0.932967	-0.00701322	1	-0.0544247	0.954659	0.0654742	0.944122
SAG24	AT1G66580	AT1G66580	0.197334	0.850594	0.317979	0.616025	0.261744	0.606694	-0.360424	0.524048	-1.02565	0.0154921	0.490468	0.278836	0.598647	0.278392	0.385083	0.62919	0.430658	0.593451	0.889874	0.0539563	1.16835	0.0133859	0.535743	0.441189	0.47297	0.691809	-0.14828	0.883114	-0.154473	0.881708
AVA-P2	AT1G19910	AT1G19910	-0.431747	0.199128	-0.174695	0.625139	0.325715	0.208771	-0.322171	0.260497	-0.595575	0.0119904	0.146764	0.592978	-0.522159	0.052856	-0.408271	0.226937	-0.393476	0.289442	-0.621883	0.0129327	-0.373302	0.231434	-0.581829	0.0566883	-0.431138	0.435184	-0.00400756	0.996028	-0.639095	0.0859724
XTH7	AT4G37800	AT4G37800	-1.22831	0.269947	-1.80627	0.0414943	-4.73934	1.04e-10	-2.06818	0.00956536	-0.0959958	0.932616	-5.73774	2.28e-15	-1.08877	0.266595	-1.319	0.218041	-1.70532	0.103659	-1.3159	0.126038	-0.877695	0.414576	-2.30172	0.0104946	-0.371081	0.90355	-0.340382	0.838706	-1.27256	0.360365
SOT16	AT1G74100	AT1G74100	-0.14703	0.93635	0.541932	0.535349	0.0683516	0.935861	0.336845	0.707652	0.234413	0.766786	1.06153	0.0843336	2.46261	2.73e-05	1.4209	0.0593303	0.497517	0.688364	2.48015	2.59e-05	1.42465	0.0412367	2.04779	0.00291074	-0.175382	0.961138	1.12659	0.250635	0.872709	0.440083
DWF1	AT3G19820	AT3G19820	0.0259714	0.996502	-0.391503	0.67356	-3.41561	3.03e-09	-1.37931	0.0355789	-1.06918	0.0900653	-3.57158	2e-10	-0.157081	0.918785	0.612447	0.573691	-0.115902	0.947876	-0.411159	0.635028	0.0283312	0.987889	0.0749503	0.968345	0.375415	0.862397	1.10305	0.264697	0.695447	0.554411
EMB3105	AT1G48350	AT1G48350	0.352446	0.765417	-0.754319	0.288043	-2.06798	7.06e-05	-1.02729	0.087845	-0.0964965	0.90094	-2.24837	9.35e-06	0.378673	0.678932	-0.402714	0.714272	-0.409399	0.717437	0.00669033	1	-0.360336	0.68772	-0.492683	0.620479	0.714325	0.61536	0.441355	0.673822	0.225711	0.859871
GolS2	AT1G56600	AT1G56600	-0.59428	0.867432	1.40332	0.476364	2.25768	0.126667	3.58826	0.0153199	3.80713	0.00550486	1.88461	0.197757	-1.25539	0.556726	-2.72811	0.149449	-1.12346	0.696771	-2.6105	0.0951098	-1.75841	0.365084	-2.39431	0.244506	-6.49074	0.000330906	-3.33336	0.120628	-2.40999	0.349475
ACR9	AT2G39570	AT2G39570	0.3507	0.743838	-0.521275	0.452752	-1.12285	0.0288222	0.448273	0.495787	-2.67258	6.51e-09	-1.30099	0.00817196	-1.80356	0.000472802	0.471239	0.607098	-0.0100012	0.995926	0.0193788	1	-0.249222	0.782135	0.174877	0.887123	-0.236988	0.907681	1.10423	0.151965	0.531047	0.589166
RLK902 AT3G18740	AT3G18740	AT3G18740	0.544471	0.343915	0.0807293	0.902772	-0.250463	0.574304	-0.169848	0.768955	-0.349254	0.413904	-0.255887	0.546674	0.476863	0.342395	0.444276	0.475058	0.345194	0.639237	0.838848	0.0357806	0.566964	0.247738	0.205852	0.799815	0.60153	0.512832	0.146611	0.860631	0.357732	0.633829
rbcL	ATCG00490	ATCG00490	1.32579	0.0709685	0.354962	0.690611	-0.0831338	0.916106	0.457105	0.554012	1.29923	0.0247883	0.527868	0.40451	0.71688	0.358086	0.820954	0.35101	0.57864	0.599641	1.30277	0.0340933	0.184142	0.872641	0.10988	0.945781	-0.625568	0.699033	-0.624367	0.552388	-0.608813	0.593633
EMB3136	AT5G13510	AT5G13510	-0.077307	0.951767	-0.86388	0.0613678	-1.59893	2.08e-05	-0.89295	0.0335652	0.213694	0.657123	-1.7499	1.7e-06	0.0890373	0.932436	-0.281271	0.727247	-0.319463	0.689226	-0.16866	0.794941	-0.480624	0.375663	-0.546533	0.375387	0.48195	0.647265	0.182363	0.827947	0.144068	0.879601
J11	AT4G36040	AT4G36040	-0.791085	0.551079	2.12096	0.011076	1.38997	0.0726939	0.866122	0.348104	1.39833	0.069835	0.558704	0.505923	-0.468348	0.723027	-0.0363562	0.98841	-0.329474	0.859331	0.309147	0.80509	0.9375	0.365337	0.334604	0.843246	-0.406195	0.886824	-1.11037	0.38509	-1.19962	0.380714
AT5G52650	AT5G52650	AT5G52650	0.178199	0.862303	0.0375147	0.960362	-0.260967	0.587446	-0.967418	0.0254547	-1.41614	0.000245135	-0.93192	0.0193778	0.319342	0.622322	0.214412	0.821034	0.21552	0.821102	0.637162	0.172007	0.152696	0.846426	-0.188433	0.834422	0.632116	0.530624	-0.0298697	0.978545	0.0620012	0.955898
AT3G55750	AT3G55750	AT3G55750	-0.31337	0.729901	-0.938782	0.0667329	-0.969819	0.0273971	-1.16337	0.0105339	-1.36972	0.0010406	-0.638588	0.154223	-0.0860579	0.943584	-0.135366	0.910535	-0.247309	0.806203	0.29958	0.625229	-0.0545496	0.956504	-0.429042	0.579489	0.583356	0.605888	-0.114892	0.916193	0.288823	0.753791
AT2G42220	AT2G42220	AT2G42220	0.0898468	0.954316	-0.638723	0.306643	-2.84552	3.27e-10	-1.33268	0.00667427	-0.0823967	0.903409	-3.48659	2.6e-15	0.202836	0.827851	-0.454201	0.599812	-0.546579	0.520816	0.0503221	0.972738	-0.608395	0.348596	-0.599266	0.438109	0.563644	0.657698	0.35657	0.703308	0.210495	0.849128
AT3G09630	AT3G09630	AT3G09630	0.138191	0.897552	-0.607461	0.234118	-0.53992	0.213181	-0.693036	0.123813	-0.981084	0.0127651	0.0362165	0.947875	0.033184	0.987248	0.124328	0.910549	0.207846	0.826917	0.502193	0.300042	0.307471	0.625619	0.143767	0.882129	0.509495	0.62797	-0.467021	0.508731	0.238459	0.78337
PRPL35	AT2G24090	AT2G24090	0.655006	0.383359	-0.198873	0.800364	-1.58303	0.000690292	-0.768816	0.160952	0.345589	0.541758	-1.85235	3.99e-05	0.669607	0.277232	0.115621	0.934608	-0.0799895	0.955196	0.255004	0.728699	-0.0396645	0.973153	-0.151149	0.898174	0.545909	0.674005	0.250135	0.804003	0.0868143	0.945984
ANNAT1	AT1G35720	AT1G35720	-0.87224	0.208813	-0.218821	0.784523	-0.0512675	0.94051	1.64787	0.000890252	2.02209	1.06e-05	1.35972	0.00392964	-0.384548	0.625578	-0.425595	0.64864	0.0204498	0.990755	-0.368111	0.590559	0.0794603	0.940764	0.0936736	0.945508	-0.492513	0.733353	0.096266	0.940213	0.216767	0.850449
AT1G19020	AT1G19020	AT1G19020	0.220035	0.958899	1.03079	0.568088	1.65043	0.219415	-1.87518	0.195518	-2.2423	0.0816632	-0.212366	0.895801	2.21005	0.133642	1.07674	0.648553	1.02649	0.681648	-0.225648	0.930729	3.01814	0.0327108	0.638621	0.814433	-1.04367	0.791138	1.09049	0.643735	-0.154358	0.96632
AT5G02450	AT5G02450	AT5G02450	0.683431	0.346761	0.0152875	0.987752	-0.350241	0.527439	-0.447158	0.462813	-0.544554	0.295217	-0.848129	0.0756695	0.653156	0.287705	0.500959	0.545978	0.54569	0.520106	0.747768	0.169141	0.562509	0.393827	0.353446	0.69913	0.550243	0.667564	-0.00637093	0.997402	0.324199	0.745703
WRKY70	AT3G56400	AT3G56400	-0.275535	0.914199	-0.471706	0.74791	0.00401488	0.99958	-3.05153	0.00111367	-3.19895	0.000278245	-2.22294	0.0136513	-2.99077	0.00136996	-2.47824	0.0230592	-1.40855	0.339684	-1.84236	0.0672039	-0.622587	0.681159	-0.830606	0.624772	-1.76111	0.384792	-2.29965	0.0943778	-2.94627	0.025563
AT3G07110	AT3G07110	AT3G07110	0.0394803	0.986658	-1.13006	0.0580438	-1.04382	0.0448725	-0.939956	0.0975654	-1.53137	0.0018077	-0.486297	0.379498	-0.0720378	0.961949	-0.3574	0.735719	-0.136344	0.921398	0.469707	0.483476	-0.196533	0.841417	-0.375093	0.703552	0.693329	0.599202	-0.623954	0.482845	0.0317893	0.986005
EFE	AT1G05010	AT1G05010	0.825305	0.252508	0.301323	0.695316	0.754169	0.154583	-1.20388	0.0239269	-1.85711	8.69e-05	-0.236934	0.688003	1.69504	0.000687325	0.739618	0.321252	-0.235893	0.846157	1.59349	0.0014981	1.06587	0.0699459	0.211305	0.852231	0.986153	0.361238	-0.0478518	0.972401	-0.163853	0.895427
AT3G26450	AT3G26450	AT3G26450	-0.382458	0.654731	-0.572629	0.329173	-1.0512	0.0177059	0.323228	0.590481	1.55602	0.000199925	-0.80869	0.0682679	-0.59654	0.299971	-0.525864	0.471698	-0.710265	0.300894	-0.826552	0.089363	-0.528708	0.389155	-1.00024	0.0814838	0.00502544	1	0.15524	0.880571	0.252139	0.794194
AT4G28460	AT4G28460	AT4G28460	-2.52463	NA	0.493083	NA	3.60265	NA	-4.07079	NA	-5.53841	NA	3.93945	NA	-0.438812	NA	0.175195	NA	2.26673	NA	-2.94812	NA	6.33769	NA	1.15078	NA	-3.43069	NA	-2.31688	NA	-0.0374642	NA
AT1G49500	AT1G49500	AT1G49500	-0.997364	0.339024	-0.667085	0.489474	0.523076	0.510648	1.36986	0.0671092	2.87049	6.71e-06	-1.31861	0.0537152	0.447655	0.7042	-1.12242	0.252502	-0.819544	0.497578	0.357121	0.735046	-0.0728973	0.96366	-1.29157	0.176882	-1.22533	0.433428	-1.70982	0.0956451	-2.14324	0.0309335
PGR5	AT2G05620	AT2G05620	0.499821	0.144845	-0.0561462	0.901105	0.0123811	0.974347	0.041375	0.937535	0.780284	0.00152107	-0.656766	0.00846941	0.144284	0.752796	-0.21582	0.6613	-0.206114	0.693121	-0.329839	0.284638	-0.335871	0.33473	-0.245245	0.594941	0.18205	0.834581	0.0893784	0.882423	-0.0335686	0.964011
AT5G16130	AT5G16130	AT5G16130	0.0930367	0.946683	-0.372821	0.561756	-1.50154	0.000483139	-0.757609	0.131126	-0.759488	0.0991287	-0.898058	0.0420322	0.218579	0.790929	0.177491	0.876633	0.101569	0.93504	0.512378	0.351656	0.207436	0.797971	-0.0332398	0.981967	0.59756	0.604873	-0.0785577	0.946904	0.302346	0.747352
AT5G47190	AT5G47190	AT5G47190	0.426829	0.651154	-0.449966	0.516644	-1.79841	0.000132001	-0.597116	0.314545	-0.413654	0.464314	-2.21021	1.17e-06	0.599704	0.364532	0.253883	0.824988	-0.196706	0.872809	0.335646	0.628162	-0.209918	0.819204	-0.124937	0.922272	0.745611	0.541647	0.639407	0.450591	0.234847	0.834258
AGP16	AT2G46330	AT2G46330	1.02678	0.418867	1.14818	0.260046	0.959961	0.266754	-1.65775	0.0536268	-0.0513938	0.969107	0.967252	0.243274	1.07053	0.297237	1.79475	0.0681323	1.88915	0.0705879	-0.218633	0.877385	2.48114	0.0034149	0.413365	0.810257	-0.0684326	0.9935	0.168375	0.932817	0.206878	0.917455
RPS18C	AT4G09800	AT4G09800	0.188137	0.79602	0.3122	0.491237	-0.135498	0.734457	-0.120062	0.816964	-0.630203	0.0550843	-0.931846	0.00261643	0.108059	0.880984	0.252229	0.693533	0.226535	0.743264	0.215715	0.639199	0.0559368	0.935636	0.0611727	0.945781	0.374581	0.668587	0.297705	0.622931	0.412051	0.499165
AT3G51450	AT3G51450	AT3G51450	-0.256372	0.908408	-0.3788	0.773064	0.0140035	0.991141	0.915732	0.35729	0.321314	0.757185	-1.13621	0.177457	5.62258	9.7e-15	2.83728	0.00103916	0.818255	0.587095	5.20452	1.65e-12	3.90103	8.48e-07	2.37009	0.0118744	-0.792902	0.744409	0.894212	0.536654	-0.321599	0.865473
AT5G03850	AT5G03850	AT5G03850	0.343233	0.638026	0.050343	0.942573	0.171221	0.716809	-0.203608	0.721339	-0.315464	0.477534	-0.360035	0.388279	0.537193	0.276271	0.58069	0.304062	0.429943	0.535853	0.790282	0.0561683	0.598095	0.227451	0.197323	0.814199	0.52312	0.598819	0.141168	0.872589	0.205433	0.809112
PHT2;1	AT3G26570	AT3G26570	0.254649	0.73176	-0.257978	0.627154	-0.546184	0.151802	-0.356312	0.429768	0.783158	0.0278136	-0.665804	0.0640366	-0.0406928	0.974949	-0.247426	0.742059	-0.201676	0.807653	-0.0538313	0.947233	-0.304298	0.577216	-0.104586	0.907445	0.143503	0.927144	-0.155752	0.842355	-0.234429	0.758166
SVR3	AT5G13650	AT5G13650	-0.693902	0.080254	-1.63792	7.44e-08	-1.80101	7.55e-10	-0.479513	0.178969	-0.0771699	0.856663	-1.59787	2.71e-08	-1.03223	0.000881068	-0.962494	0.00581909	-1.0885	0.00229663	-1.28442	1.78e-05	-1.30418	3.33e-05	-1.27028	0.000138493	0.0381302	0.984395	0.125033	0.855794	-0.0560967	0.945984
CCL	AT3G26740	AT3G26740	-1.69763	0.0822229	1.75115	0.0465759	0.212478	0.828298	2.28123	0.00327303	2.67751	0.000196287	1.48229	0.0491686	-0.920346	0.371709	-0.364038	0.843368	0.325871	0.861315	-0.772533	0.426493	0.841015	0.434624	1.20875	0.28268	-1.25929	0.495133	-1.05856	0.417142	-0.937812	0.515605
GSR 1	AT5G37600	AT5G37600	-0.0913192	0.971357	-0.0420178	0.973869	0.319225	0.684707	-0.045655	0.985053	-3.01642	4.49e-07	-0.294972	0.69818	0.473229	0.658775	-0.0961747	0.961769	0.124966	0.946858	0.192705	0.866136	0.190487	0.882792	0.675591	0.545687	-1.04104	0.514302	-2.00757	0.02376	-0.435025	0.749234
AT5G42050	AT5G42050	AT5G42050	0.651725	0.54551	0.519071	0.557961	1.29918	0.0362492	1.17797	0.0824755	0.628537	0.359785	1.40071	0.019536	0.484533	0.620386	-0.424846	0.743267	-0.201805	0.898978	0.166795	0.880908	0.330104	0.759684	-0.197086	0.895906	-0.688099	0.684606	-0.793895	0.455444	-0.758096	0.515605
AT3G52800	AT3G52800	AT3G52800	1.28912	0.108452	1.30174	0.0729848	1.96696	0.00092657	1.5683	0.0152519	1.81516	0.00224206	1.57199	0.00818913	2.34526	8.87e-05	1.19337	0.145196	1.27362	0.141237	0.974056	0.166849	0.633737	0.476725	0.657299	0.535225	-0.596061	0.744409	-0.307715	0.811929	-0.303094	0.827967
STO	AT1G06040	AT1G06040	-0.195259	0.776529	-0.307051	0.483465	-0.0958496	0.811099	0.120199	0.808076	0.9185	0.00227789	-0.312931	0.353268	-0.744389	0.0284459	-0.940342	0.00809846	-0.504854	0.297155	-0.761024	0.0197008	-0.849429	0.0139595	-0.563083	0.202858	-0.181516	0.874286	-0.341142	0.54347	-0.296498	0.635364
MTHFR1	AT3G59970	AT3G59970	-0.206449	0.869466	-0.550827	0.418426	-1.36305	0.0055894	-0.998283	0.0653534	0.283969	0.638485	-1.42501	0.0028361	0.369771	0.646617	0.402411	0.677551	-0.17078	0.893519	0.856932	0.12256	0.661983	0.321288	0.614844	0.446632	0.335712	0.846794	0.636276	0.459282	0.244115	0.827967
ARD4	AT5G43850	AT5G43850	0.206115	0.875426	-0.258042	0.754055	-0.0587862	0.934366	1.55287	0.00315891	1.78794	0.000251476	-0.0644775	0.924979	-1.16794	0.0406369	-1.35646	0.0265574	-1.04925	0.152005	-1.22789	0.0236211	-1.20573	0.041376	-0.857398	0.255305	-0.477233	0.761459	-0.401557	0.690803	-0.207116	0.864979
AT3G58610	AT3G58610	AT3G58610	-0.109076	0.908783	-0.829282	0.0388222	-1.03722	0.00251545	-0.521731	0.197252	-0.408206	0.284311	-0.589554	0.0961151	0.252686	0.660747	-0.159987	0.851627	-0.166434	0.844501	0.281447	0.552367	-0.163582	0.797061	-0.206615	0.777821	0.528441	0.542587	-0.149175	0.845246	0.236843	0.748556
PIP1;5	AT4G23400	AT4G23400	-0.693538	0.327654	-1.06503	0.0521363	-1.43965	0.00169834	-2.12789	2.88e-06	-0.553313	0.281074	-3.5215	3.42e-16	-1.14555	0.0238242	-1.253	0.0237856	-1.10928	0.0769075	-1.95037	1.64e-05	-1.66042	0.000760832	-1.02634	0.0967679	0.0130571	1	-0.168668	0.876796	-0.469079	0.614777
AT2G45820	AT2G45820	AT2G45820	0.406338	0.513712	0.394872	0.430594	0.0405319	0.936346	0.530324	0.209643	1.80136	6.58e-08	-0.462311	0.226774	1.20005	0.000934291	1.01136	0.0167444	0.155918	0.861578	0.550862	0.188035	0.370299	0.482986	0.461907	0.432675	-0.0304562	0.994789	0.341125	0.613732	-0.0325137	0.977239
FNR2	AT1G20020	AT1G20020	0.213604	0.816348	-0.416612	0.449775	-1.67917	9.37e-06	-0.44302	0.366287	0.383001	0.392994	-2.13586	5.64e-09	0.366006	0.537117	-0.262591	0.757268	0.0568767	0.96053	0.588157	0.202529	-0.0334774	0.972665	0.263953	0.738774	0.40165	0.727288	0.0944672	0.924518	0.17185	0.853843
CYP79B2	AT4G39950	AT4G39950	0.635359	0.758996	1.40278	0.257011	1.81539	0.0651973	0.483413	0.739247	0.569034	0.625562	3.9009	1.15e-05	2.89732	0.00317871	2.81393	0.010199	0.983687	0.583087	4.46543	9.88e-07	3.83799	8.34e-05	3.20059	0.00314532	-0.221771	0.96958	1.89142	0.209593	0.924595	0.629048
AT2G04050	AT2G04050	AT2G04050	0.698037	0.854853	-0.995195	0.612823	1.67561	0.253443	1.93779	0.269282	-6.3607	3.47e-07	1.3617	0.34706	0.0932394	0.99811	-0.813618	0.781967	0.732917	0.816424	0.432137	0.872651	0.389282	0.884243	0.721447	0.805416	-0.480696	0.9589	-3.43181	0.0801333	0.931295	0.741837
AT1G33120	AT1G33120	AT1G33120	0.379911	0.607704	-0.558632	0.283926	-0.385039	0.394359	-0.142797	0.825587	-0.666039	0.10984	0.312581	0.482193	0.273031	0.688319	0.0950419	0.935531	0.251175	0.778744	0.723273	0.103772	0.349684	0.564308	0.049717	0.967834	0.375228	0.756452	-0.39618	0.589276	0.076274	0.942615
emb2184	AT1G75350	AT1G75350	0.62574	0.223326	-0.0697504	0.91451	-0.837094	0.0226949	-0.151195	0.790744	0.587772	0.121453	-1.20773	0.000480644	0.736322	0.0747667	0.235847	0.763875	0.101661	0.917179	0.414305	0.358114	0.0713271	0.926552	0.0510433	0.962319	0.50523	0.590825	0.387817	0.554195	0.101717	0.911441
EMB3137	AT5G14320	AT5G14320	0.208905	0.813708	-0.376058	0.486882	-1.56301	2.03e-05	-0.736086	0.083404	0.270402	0.554002	-1.9897	2.01e-08	0.333006	0.571516	-0.212224	0.811076	-0.247001	0.771139	-0.0170429	1	-0.337897	0.562257	-0.175274	0.83865	0.4006	0.713863	0.324623	0.658946	0.149676	0.869594
AT5G64400	AT5G64400	AT5G64400	-0.178736	0.72497	-0.208404	0.555444	0.0894508	0.771282	0.165788	0.625521	0.223547	0.421356	0.158013	0.568413	0.00516814	1	0.037325	0.961616	0.0153764	0.984661	-0.0778749	0.853664	0.124633	0.774528	0.0245664	0.974372	-0.107232	0.915322	-0.288762	0.50415	-0.296141	0.526921
MSS1	AT5G26340	AT5G26340	-0.00119198	1	0.474039	0.805745	0.571059	0.691487	1.84053	0.178711	-3.00935	0.0093968	1.83707	0.12506	0.838787	0.675891	-0.516375	0.858118	-0.172899	0.96021	0.760894	0.657645	1.83737	0.227222	0.201303	0.951228	-1.43187	0.661978	-2.93966	0.0943778	-1.40085	0.535106
AT5G27770	AT5G27770	AT5G27770	0.00733187	1	-0.425715	0.381696	-0.545448	0.154282	-0.624672	0.124006	-1.21289	0.000408846	-0.937138	0.00723303	0.0499348	0.962725	-0.0802205	0.94114	-0.172716	0.843514	0.22748	0.662774	-0.119621	0.866251	-0.318805	0.632831	0.522656	0.563906	0.118959	0.890266	0.388008	0.579534
ABCC3	AT3G13080	AT3G13080	0.813488	0.590515	-0.0164009	0.99291	-0.298121	0.773362	-0.7203	0.510778	-4.14953	4.91e-08	-0.41128	0.669613	-0.284014	0.877449	-0.673309	0.673641	-0.320199	0.876865	-1.26038	0.194851	0.652242	0.611439	-0.245237	0.904726	-1.34935	0.512832	-1.76108	0.165934	-0.235814	0.908976
FAD5	AT3G15850	AT3G15850	-0.477987	0.552493	-1.06646	0.0444187	-1.87736	2.01e-05	-2.18924	6.98e-07	-0.71999	0.132509	-3.07336	4.53e-13	-0.908915	0.081535	-1.1369	0.0396236	-0.888299	0.182382	-0.768322	0.135463	-1.15874	0.0243258	-1.2023	0.0335805	0.347277	0.822176	0.216818	0.823483	-0.388749	0.679291
VDAC3	AT5G15090	AT5G15090	-0.237197	0.755416	-0.855795	0.0352167	-0.437204	0.263164	-0.632409	0.11099	-0.926569	0.00743967	0.339306	0.378269	-0.12894	0.86489	-0.419209	0.473339	0.08585	0.930717	0.0124849	1	-0.15199	0.818755	-0.272968	0.690362	0.500205	0.58091	-0.598369	0.306633	0.444045	0.510785
TUA6	AT4G14960	AT4G14960	-0.209193	0.78824	-0.0660591	0.915543	-0.972475	0.00491087	-1.23126	0.000438408	-1.36759	3.14e-05	-0.902229	0.0079049	-0.129833	0.861579	0.136948	0.878882	-0.103712	0.911135	0.176594	0.747255	-0.114736	0.867745	0.187261	0.805416	0.368847	0.708986	0.36827	0.560146	0.427196	0.52134
SIR	AT5G04590	AT5G04590	-0.457493	0.422662	-0.359763	0.466035	-0.909619	0.00975955	-0.284809	0.542864	-0.178642	0.68306	-0.282707	0.470312	0.220144	0.721646	-0.04762	0.965321	-0.260274	0.727363	0.649092	0.0962527	0.0292303	0.973153	0.0764502	0.935915	0.10355	0.959233	0.283691	0.678265	0.0696019	0.940413
PIP1;4	AT4G00430	AT4G00430	0.289015	0.639163	-0.438502	0.301431	1.02318	0.00107126	-0.140352	0.780029	0.177845	0.653894	0.45228	0.177256	-0.403682	0.353737	-0.256225	0.687165	-0.357479	0.544251	0.147084	0.780059	-0.206462	0.701812	-0.261619	0.670892	0.204519	0.85959	0.161923	0.811328	-0.010396	0.99244
AT2G17360	AT2G17360	AT2G17360	-0.585417	0.349416	-1.31052	0.00292955	-1.36059	0.0005736	-0.960493	0.0267654	-1.37152	0.000405115	-0.709395	0.0846594	-0.431262	0.45698	-0.558122	0.370948	-0.399277	0.608095	-0.185081	0.779962	-0.50512	0.367197	-0.549529	0.396656	0.452697	0.686746	-0.105531	0.917265	0.338405	0.684122
RPL24A	AT2G36620	AT2G36620	-0.0958641	0.947939	-1.09152	0.0435597	-1.08029	0.021971	-1.41361	0.00311376	-1.11264	0.0161413	-0.796241	0.0927872	0.0713022	0.957798	0.11307	0.934222	-0.135867	0.913062	0.410415	0.509038	0.225039	0.790706	-0.231495	0.822224	0.572166	0.648275	-0.144125	0.899715	0.229095	0.828874
AT5G61170	AT5G61170	AT5G61170	0.147256	0.905268	-0.720212	0.209259	-0.926747	0.0460595	-0.813556	0.108991	-0.765478	0.103745	-0.217287	0.684785	0.327596	0.662468	0.37316	0.670777	0.185877	0.869755	0.817085	0.104318	0.487618	0.45131	0.0959335	0.937426	0.663126	0.558079	-0.0385365	0.976147	0.315926	0.738963
AT2G43530	AT2G43530	AT2G43530	-0.542632	0.609615	-0.89355	0.230799	-1.58976	0.00543913	0.917678	0.159963	1.87281	0.000617865	-1.56329	0.00498435	2.82465	1.22e-07	2.19038	0.000303076	0.429798	0.717693	3.3316	2.6e-10	3.49908	1.21e-10	2.33134	0.000119825	-0.229235	0.92773	1.42679	0.0943778	0.291031	0.820879
AT1G74730	AT1G74730	AT1G74730	-0.153416	0.869243	-0.622598	0.174488	-1.30514	0.000245155	-0.767286	0.0548122	0.294169	0.491231	-1.5432	7.27e-06	0.154795	0.8314	-0.306361	0.666533	-0.278391	0.716639	-0.054818	0.948185	-0.399515	0.445709	-0.446429	0.461578	0.197757	0.88694	0.0840095	0.927457	-0.102122	0.9119
GolS1	AT2G47180	AT2G47180	0.100957	0.961652	0.622446	0.459433	-0.51224	0.461256	1.28515	0.0479205	2.68892	1.4e-06	-1.10333	0.0694045	2.38973	3.58e-05	1.33322	0.0776154	0.0237101	0.991046	3.53326	1.71e-10	2.86033	1.58e-06	2.46426	0.000106551	-0.128003	0.972078	0.519468	0.651787	0.0577324	0.975648
AKR2	AT4G35450	AT4G35450	-0.230518	0.446002	-0.478739	0.0230124	-0.740909	3e-05	-0.274122	0.20081	0.111482	0.618217	-0.529172	0.00295727	-0.156102	0.583323	-0.221134	0.46667	-0.227504	0.481194	-0.450718	0.0194892	-0.520774	0.0102417	-0.426104	0.0751927	-0.0419203	0.969994	-0.080402	0.842503	-0.146772	0.699541
SCO1	AT1G62750	AT1G62750	0.151759	0.851188	-0.70673	0.0716414	-1.48601	2.68e-06	-0.295677	0.491805	0.491999	0.159486	-1.62766	1.29e-07	-0.0390734	0.973588	-0.366738	0.516719	-0.369741	0.540906	-0.295694	0.501288	-0.769931	0.0433394	-0.28469	0.647735	0.266694	0.803707	0.0619087	0.944095	0.0643901	0.941837
AT5G59850	AT5G59850	AT5G59850	0.0460442	0.980848	-0.766747	0.129412	-0.948267	0.023393	-1.02676	0.0191375	-1.11118	0.00599204	-0.719971	0.0856638	0.077758	0.945173	0.260138	0.772244	-0.0587509	0.960956	0.604914	0.211035	0.319423	0.624461	-0.134064	0.895362	0.634416	0.536952	0.0296422	0.97859	0.255247	0.77563
AT1G09590	AT1G09590	AT1G09590	0.235444	0.764895	-0.497273	0.293918	-0.636819	0.0919167	-0.428227	0.333371	-0.801448	0.0266092	-0.150715	0.728059	0.280855	0.62834	0.272864	0.707172	0.194773	0.818568	0.76112	0.0501816	0.508203	0.289848	0.07965	0.934574	0.636151	0.452831	-0.14076	0.861257	0.34593	0.632326
AT4G27652	AT4G27652	AT4G27652	2.82579	0.00227741	1.11199	0.322729	2.0284	0.017526	2.8079	0.000912159	3.92763	5.02e-07	2.07143	0.0125438	3.86902	1.07e-06	0.874318	0.560186	4.17653	1.66e-06	3.15369	0.000127277	0.945504	0.43113	1.91787	0.0835922	-0.0364867	1	-0.338956	0.859332	2.01358	0.147787
COL5	AT5G57660	AT5G57660	-0.743659	0.243426	-0.120797	0.874228	0.0242819	0.970437	-0.442801	0.433046	-0.292552	0.583646	-1.16475	0.00681975	1.0552	0.029668	0.307712	0.743688	-0.499578	0.535853	0.313113	0.615789	0.132321	0.882035	-0.40701	0.615874	-0.498712	0.684259	-0.749741	0.30898	-1.13611	0.104399
RGF9	AT5G64770	AT5G64770	-0.521431	0.733968	-1.53658	0.0781487	-3.2664	3.53e-06	1.18543	0.157037	1.69142	0.0203549	-2.63047	0.000153918	-0.371345	0.782329	-0.827977	0.504654	-1.04773	0.388366	-0.101553	0.954173	-0.307897	0.82398	-0.268522	0.879901	0.302068	0.925716	-0.273901	0.869558	0.504336	0.744285
CHLI1	AT4G18480	AT4G18480	-0.365629	0.657754	-1.05144	0.0308734	-1.95642	1.34e-06	-1.55973	0.000220654	-0.725021	0.0997092	-2.20509	2.15e-08	-0.173506	0.83956	-0.56694	0.390461	-0.523055	0.480332	-0.309677	0.600981	-0.70569	0.190952	-0.750624	0.217151	0.347732	0.798952	0.147174	0.883114	0.0640128	0.956923
CAD9	AT4G39330	AT4G39330	-0.39431	0.858445	-1.17765	0.312436	-4.05372	1.87e-06	-0.548372	0.66339	1.01855	0.293976	-4.46228	7.54e-08	-0.928934	0.461936	-0.404349	0.85225	-0.948081	0.559162	-1.50872	0.130199	-1.12379	0.353679	-1.24002	0.371512	-0.240897	0.964413	0.228121	0.917534	0.237628	0.915334
TRXF1	AT3G02730	AT3G02730	-0.223558	0.855534	-0.715218	0.266474	-1.00842	0.0470795	0.363543	0.589898	1.35074	0.00514148	-0.96634	0.0513165	0.281061	0.750838	-0.481431	0.591641	-0.439571	0.654619	-0.176548	0.834316	-0.360225	0.651149	-0.48711	0.581558	0.210688	0.920156	0.0894611	0.946372	0.0239514	0.989273
CML37	AT5G42380	AT5G42380	1.90791	0.364263	0.510069	0.820896	2.01903	0.159111	-0.496761	0.82152	-3.2688	0.016662	0.950259	0.531707	2.39587	0.135916	-0.438933	0.90503	1.78042	0.436107	0.640784	0.768584	4.3746	0.00237017	0.981597	0.707551	-2.40432	0.472178	-0.289845	0.932342	-0.0817167	0.986584
PIP2E	AT2G39010	AT2G39010	0.0847674	0.947939	-0.311108	0.610446	-0.132972	0.801504	-0.406807	0.438154	0.0324302	0.960503	-1.8489	1.5e-06	0.0503655	0.971534	-0.138345	0.89962	-0.405163	0.608241	0.134077	0.850619	-0.273871	0.687568	-0.206053	0.820704	-0.350712	0.786831	-0.0360757	0.975386	-0.148093	0.882292
AT1G14250	AT1G14250	AT1G14250	-1.05441	0.46372	-1.47466	0.178564	-1.60405	0.0898023	-0.429205	0.744076	1.52256	0.0895855	-2.35722	0.00826425	2.80491	0.00130677	0.963207	0.514828	1.10647	0.461006	3.38575	6.03e-05	1.80869	0.0784332	1.80037	0.125623	1.75625	0.337834	1.53509	0.278555	1.55669	0.321149
TIFY10B	AT1G74950	AT1G74950	-0.17984	0.923267	0.0999739	0.934338	0.753978	0.304554	0.321229	0.750135	1.02048	0.14322	0.144916	0.864756	4.37312	2.72e-13	2.50627	0.000372719	0.788717	0.503104	1.54854	0.0267576	1.8188	0.0129974	1.35359	0.131343	-0.497458	0.82567	1.27065	0.22824	-0.169908	0.920447
TSB1	AT5G54810	AT5G54810	-0.659688	0.323399	0.30201	0.646411	-0.262583	0.615788	-0.129956	0.857877	-1.88521	3.97e-06	-0.142468	0.790827	0.88552	0.0774541	0.163134	0.885341	-0.313029	0.737845	1.84805	1.24e-05	0.435052	0.496854	0.21153	0.826726	-0.132555	0.957287	0.450672	0.573231	0.132451	0.903224
UBQ14	AT4G02890	AT4G02890	0.00682527	1	-0.265368	0.568599	-0.205837	0.587157	-0.152142	0.755069	0.436836	0.202476	-0.606411	0.0583697	-1.09738	0.000589293	-1.05946	0.00274844	-0.939061	0.0173351	-1.21921	0.000101593	-0.296681	0.534058	-0.635132	0.147242	-0.482663	0.544831	-0.687774	0.165934	-0.544827	0.34913
AT1G70780	AT1G70780	AT1G70780	-0.16842	0.869031	0.335325	0.563743	1.73943	4.02e-06	-0.298904	0.583672	-0.835447	0.0387578	1.24522	0.00106675	1.58562	4.41e-05	0.578784	0.338003	0.543935	0.417008	1.62306	2.97e-05	1.03613	0.0208644	0.789316	0.151222	-0.378442	0.753702	0.0508535	0.962541	-0.311424	0.705261
PFL	AT1G22780	AT1G22780	0.177175	0.883171	-0.307997	0.66254	-0.787794	0.105831	-0.982626	0.0527296	-1.47385	0.000982045	-0.943014	0.041626	0.150931	0.886695	0.0311135	0.983364	-0.0149978	0.993382	0.481286	0.417466	0.0932914	0.924701	-0.265983	0.787286	0.590394	0.632106	-0.05535	0.965139	0.356857	0.708732
AT3G20390	AT3G20390	AT3G20390	0.0193908	0.995687	-0.496493	0.392685	-0.987695	0.0223718	-0.655944	0.183543	0.160849	0.772302	-1.25007	0.00237978	1.45379	0.000618052	0.203774	0.844022	-0.206359	0.842784	1.5469	0.000230522	0.816866	0.11423	0.33501	0.682695	0.413723	0.7444	0.606002	0.403486	0.471775	0.569117
HDR	AT4G34350	AT4G34350	0.0693858	0.924932	0.34591	0.318245	0.477055	0.0792332	-0.146066	0.703064	0.85039	0.000686083	0.243322	0.395608	0.0380996	0.960513	-0.218416	0.667098	-0.163287	0.782392	-0.329605	0.298441	-0.288928	0.437691	-0.0606505	0.930099	-0.0809936	0.954279	0.0205045	0.977819	-0.304892	0.54893
ndhI	ATCG01090	ATCG01090	-0.460434	0.572719	-1.05095	0.0471276	-2.03069	2.57e-06	-0.784038	0.126056	-0.0876256	0.892487	-3.23853	6.07e-15	-0.457463	0.487562	-0.628877	0.366631	-1.25796	0.0280653	-0.431819	0.467071	-0.98505	0.0647687	-1.03387	0.080182	-0.0707031	0.982081	-0.301693	0.741049	-0.517434	0.556117
RPL4	AT1G07320	AT1G07320	0.453008	0.593929	-0.550777	0.382396	-2.37081	8.7e-08	-0.885374	0.0860597	-0.425785	0.422294	-2.8812	2.02e-11	0.286406	0.725925	0.139817	0.915248	-0.286385	0.785612	-0.0332124	0.992215	-0.271444	0.733736	-0.345432	0.701662	0.486294	0.713069	0.619296	0.440952	0.335927	0.727288
ILL6	AT1G44350	AT1G44350	-1.08125	0.428595	-0.168602	0.907885	0.701064	0.460226	0.11358	0.951411	0.279103	0.797794	0.355136	0.717738	5.33317	1.01e-12	3.09259	0.000407191	1.25628	0.338337	4.86369	1.77e-10	3.60847	1.22e-05	2.84786	0.00190913	-0.692474	0.794948	1.6666	0.194428	-0.171734	0.937894
AT5G57345	AT5G57345	AT5G57345	0.351908	0.68189	0.534158	0.357699	0.246192	0.637009	0.338017	0.557327	1.84863	4.33e-06	-0.18808	0.714869	0.517056	0.378359	-0.124973	0.919788	0.337622	0.704204	0.587378	0.251446	0.482249	0.431041	0.0493709	0.971259	-0.121913	0.961603	-0.337626	0.691616	-0.513971	0.538234
EXT3	AT1G21310	AT1G21310	-0.0174478	1	-0.486424	0.781105	-0.669044	0.599789	-0.506828	0.761135	-5.14039	4.16e-07	-5.39864	5.68e-08	-3.29031	0.00576471	-2.38956	0.0783476	-1.76511	0.287626	-2.26457	0.0584734	0.955949	0.556714	-1.41403	0.411661	-2.83123	0.158178	-3.70415	0.0100041	-2.40903	0.180708
BGAL1	AT3G13750	AT3G13750	-0.153888	0.938417	0.609485	0.504138	0.327208	0.679407	-2.34341	0.000312236	-3.77242	2.23e-10	-3.88091	1.64e-10	-0.614354	0.522361	-1.22774	0.159223	0.121105	0.948898	-1.85909	0.00517791	-1.88471	0.00774033	-1.13358	0.224745	-0.249532	0.932895	-0.9153	0.407204	-0.819315	0.506609
AT5G23820	AT5G23820	AT5G23820	0.54156	0.737579	0.740535	0.495599	-2.06631	0.00845382	-0.383262	0.742572	0.418459	0.659894	-1.40609	0.0729222	3.0197	4.93e-05	2.18851	0.0140157	-0.0656343	0.977543	3.28955	8.34e-06	3.15159	5.69e-05	2.25322	0.0129602	1.3597	0.447638	2.31054	0.031054	1.28935	0.357876
AILP1	AT5G19140	AT5G19140	-0.0170447	1	1.12007	0.194365	0.372892	0.653516	0.320536	0.76046	0.687211	0.373678	-0.310712	0.702218	0.492267	0.668165	0.227043	0.902536	0.187606	0.918636	0.129399	0.926824	0.653997	0.521738	0.597626	0.640479	-0.295387	0.919226	-0.436078	0.754894	-0.668478	0.624494
AT1G56220	AT1G56220	AT1G56220	-1.02837	0.120414	1.42288	0.0108162	-0.308232	0.604908	0.895884	0.110668	2.98878	6.04e-11	0.5892	0.265235	-1.36298	0.00991754	-0.510596	0.571132	-0.281657	0.80805	-1.30887	0.0119971	-0.151084	0.88092	-1.19888	0.0602619	-1.00917	0.343693	-0.353719	0.726625	-1.21148	0.133476
ACT8	AT1G49240	AT1G49240	0.466087	0.119855	0.178542	0.592164	0.103669	0.710927	-0.523383	0.0321308	-1.19544	9.82e-09	-1.00309	2e-06	-0.329329	0.257157	-0.0268087	0.96924	-0.094925	0.86594	-0.732075	0.00134755	-0.293468	0.341906	-0.118364	0.811683	-0.245083	0.701236	0.227445	0.584086	0.0317112	0.961071
CDC48	AT3G09840	AT3G09840	0.223225	0.536041	0.726192	0.000819578	0.39768	0.0586498	0.534686	0.0132901	-0.0912909	0.725912	0.301699	0.152513	0.150022	0.660745	0.53072	0.0294082	0.200084	0.610533	0.0587768	0.872705	0.319956	0.227227	0.704971	0.00209515	-0.139125	0.848535	-0.0954947	0.828074	-0.233231	0.55718
ELI3-1	AT4G37980	AT4G37980	0.238805	0.862303	0.431896	0.589501	0.0561696	0.94149	1.06389	0.0762537	2.02165	8.37e-05	0.71	0.212996	0.11445	0.939353	-0.00738739	0.998655	-0.659312	0.496585	-0.100937	0.928397	-0.485538	0.555731	0.119703	0.935159	0.194989	0.93963	-0.0976639	0.946634	0.163428	0.90485
AT2G32150	AT2G32150	AT2G32150	-0.372951	0.84503	1.67577	0.0716414	2.21185	0.00403675	1.03509	0.270652	1.23279	0.135987	0.302226	0.750323	4.40283	1.26e-09	2.53948	0.00376519	0.0436669	0.98708	1.09488	0.239647	1.86093	0.0389486	0.66977	0.650883	-0.736973	0.75882	1.48933	0.237483	-0.648932	0.687681
TIM	AT2G21170	AT2G21170	0.130654	0.890179	-0.608253	0.174735	-1.59206	3.27e-06	-0.625763	0.121199	0.452832	0.244257	-0.611029	0.0934107	0.203801	0.750484	-0.184466	0.827821	-0.230246	0.772321	-0.11449	0.853664	-0.238774	0.686709	-0.213079	0.777499	0.369115	0.721108	0.28327	0.686578	0.207351	0.791752
F3H	AT3G51240	AT3G51240	1.50483	0.114105	0.191478	0.878739	0.352217	0.694108	0.657949	0.484638	2.22527	0.00146573	4.14901	3.23e-10	-1.28986	0.136065	-0.833136	0.496878	-1.17893	0.302091	-1.77154	0.0205517	-0.748967	0.478199	-0.796071	0.526145	0.152616	0.972812	1.1336	0.355439	0.813383	0.564438
ATCG00820	ATCG00820	ATCG00820	2.08075	1.63e-08	0.667419	0.155056	0.156498	0.740614	0.354304	0.467755	0.980331	0.00841725	0.235609	0.588022	1.40745	0.000147749	0.986676	0.0289496	0.678122	0.232924	0.899598	0.0243	0.640013	0.182646	0.520514	0.38729	-0.0732305	0.976098	-0.0547074	0.95844	0.152221	0.865473
AT5G02160	AT5G02160	AT5G02160	0.175888	0.891612	-0.202291	0.800786	-2.01122	1.72e-05	-1.87367	0.000108358	-1.13715	0.0195276	-3.99952	7.1e-19	0.234468	0.798549	-0.970977	0.132996	-0.484482	0.603684	-0.310766	0.660194	-1.43147	0.00734195	-1.23671	0.0431928	0.0623348	0.984395	-0.240809	0.815648	-0.420099	0.675907
emb1138	AT5G26742	AT5G26742	-0.129871	0.87335	-1.24969	0.000172683	-1.93877	1.04e-10	-0.127498	0.799429	-0.128843	0.75387	-0.416117	0.212212	-0.344178	0.446267	-0.0899884	0.920989	0.045695	0.96053	-0.75638	0.0243342	-0.46727	0.265372	-0.179399	0.79236	0.27398	0.784084	0.179142	0.786787	0.31115	0.623469
AT1G23710	AT1G23710	AT1G23710	1.48081	0.308722	0.806058	0.569332	1.75865	0.0809099	0.818908	0.523529	1.05276	0.330564	1.18036	0.24977	0.214603	0.936086	-0.142226	0.962545	1.12834	0.517249	-0.117891	0.964014	3.17798	0.00222454	0.809501	0.661406	-0.837626	0.784779	-1.24046	0.466936	-0.131349	0.963137
ATCG00040	ATCG00040	ATCG00040	0.947179	0.19429	0.149074	0.868896	-1.40738	0.00746554	-0.285759	0.713292	0.601387	0.298357	-1.41976	0.00556702	1.084	0.0686066	0.845756	0.262793	0.177373	0.896572	0.451887	0.520445	-0.218389	0.827531	0.355904	0.733641	0.147277	0.962256	-0.294971	0.788255	-0.69795	0.480191
AT3G02560	AT3G02560	AT3G02560	0.486112	0.521724	0.158714	0.83015	-0.361302	0.47613	-0.815437	0.0956397	-1.33819	0.00156136	-0.820619	0.0620666	0.222985	0.782108	0.363636	0.668159	0.328874	0.719384	0.669755	0.186271	0.290669	0.68774	0.118554	0.916558	0.580479	0.614595	0.0756369	0.949195	0.219434	0.824365
LTI65	AT5G52300	AT5G52300	3.12539	0.238853	4.45256	0.00317654	4.9412	0.000253659	10.2484	9.9e-10	10.0288	7.4e-16	9.3695	9.07e-14	2.9233	0.201802	-0.116105	0.980949	1.65544	0.53414	2.15228	0.353612	0.625893	0.818936	1.8118	0.448838	-1.51877	0.850277	-1.85087	0.579608	-3.05128	0.408941
CT-BMY	AT4G17090	AT4G17090	0.961285	0.13103	-0.805879	0.177634	-0.208676	0.724936	-1.85753	8.96e-05	-1.93828	1.68e-05	-2.76356	5.44e-10	-0.0322489	0.994466	-0.550593	0.493953	-0.593385	0.478208	-0.0525037	0.971327	-0.44049	0.53851	0.051112	0.973064	-0.323712	0.847513	-0.561791	0.508048	0.103503	0.934891
DIC2	AT4G24570	AT4G24570	1.16397	0.499023	-0.20676	0.907685	0.577709	0.640989	0.473103	0.75946	1.24146	0.259883	-0.330671	0.794323	1.52158	0.231531	-0.378055	0.885341	3.31449	0.00575969	0.982295	0.45467	-0.0272994	0.994915	0.945168	0.610563	-0.331472	0.948403	-0.641366	0.755301	1.97829	0.265649
RING1	AT5G10380	AT5G10380	-0.287137	0.891612	0.0317916	0.985228	-0.00289499	1	-0.356534	0.772001	-3.18737	1.98e-05	-2.25571	0.0031039	-0.63682	0.614878	-0.917889	0.490863	-0.539351	0.754098	-0.496913	0.669019	-0.423509	0.762575	-0.915519	0.493579	-1.38881	0.462192	-2.3367	0.0354196	-1.40688	0.323931
AT1G09640	AT1G09640	AT1G09640	-0.226158	0.619973	-0.233682	0.491612	-0.414201	0.103389	-0.481308	0.0718808	-1.1971	8.06e-08	-0.658895	0.00498178	-0.176949	0.65979	-0.0681591	0.92102	-0.197895	0.688453	0.208698	0.520027	-0.132059	0.755137	-0.255881	0.544295	0.298001	0.648267	-0.0538274	0.92941	0.0231183	0.975755
AT3G13120	AT3G13120	AT3G13120	0.143922	0.907902	-1.03123	0.053063	-2.52514	4.44e-09	-1.21602	0.0107089	-0.51643	0.303294	-2.47668	3.99e-09	0.0664467	0.960513	-0.439374	0.595541	-0.588302	0.449826	-0.196922	0.794281	-0.651613	0.281262	-0.680891	0.328267	0.466733	0.722253	0.388997	0.654054	0.26713	0.788006
MIPS2	AT2G22240	AT2G22240	0.0602865	0.98161	-0.0214164	0.986045	-1.0576	0.0691257	1.32131	0.0252381	2.57934	5.17e-07	-0.314746	0.626893	-1.31837	0.0303299	-0.749088	0.386169	-0.855471	0.339669	-2.15239	7.88e-05	-1.31585	0.0391755	-0.652323	0.486906	-0.771662	0.592081	0.347807	0.758947	0.379019	0.748506
ENH1	AT5G17170	AT5G17170	-0.420665	0.564944	-0.68326	0.183523	-1.03726	0.0116493	-0.974461	0.0255807	0.0339073	0.957661	-1.18108	0.00282926	-0.462508	0.418035	-0.84476	0.113332	-0.332105	0.691675	-4.09267	1.98e-29	-3.67686	1.1e-22	-2.49481	7.92e-10	0.066943	0.980093	-0.0720581	0.947476	0.0861055	0.937242
PETE1	AT1G76100	AT1G76100	0.225753	0.817087	-0.177049	0.797717	-1.90029	1.96e-06	-0.397429	0.461337	0.389112	0.416433	-2.21063	1.23e-08	0.38355	0.543106	0.106826	0.930199	-0.205672	0.84076	0.292654	0.620933	0.0884267	0.920402	-0.422351	0.569305	0.504816	0.65664	0.342233	0.673574	0.0773699	0.94513
GRF1 AT4G09000	AT4G09000	AT4G09000	-0.259614	0.506027	-0.0735683	0.849624	0.686009	0.00195864	0.0819338	0.823458	0.157935	0.559702	-0.212618	0.392237	0.522193	0.0369809	0.220564	0.591785	0.125023	0.814229	0.426147	0.0890839	0.203331	0.552899	0.13286	0.78155	-0.311575	0.598107	-0.242655	0.55538	-0.146796	0.763149
AT1G51200	AT1G51200	AT1G51200	0.66133	0.176983	0.112129	0.853447	0.268523	0.517887	0.956286	0.0101531	0.194317	0.656823	0.129174	0.765389	-0.105745	0.900261	-0.135156	0.88265	-0.168768	0.845591	-0.359108	0.433534	-0.391752	0.439021	-0.136646	0.870329	-0.207882	0.874286	0.0435161	0.964162	0.135732	0.873114
AT5G56670	AT5G56670	AT5G56670	0.632698	0.286843	0.0384484	0.959084	-0.118077	0.821325	-0.337123	0.528318	-0.426147	0.34466	-0.0995099	0.845737	0.767235	0.102	0.71836	0.19796	0.514394	0.458502	1.00124	0.0178206	0.819335	0.0889263	0.346458	0.648385	0.67944	0.485191	0.211795	0.803618	0.345394	0.677371
CZF1	AT2G40140	AT2G40140	0.423547	0.844694	0.160827	0.920132	1.04779	0.288444	-0.165538	0.924176	-1.26524	0.185486	0.747847	0.448529	0.05258	0.99811	-0.518789	0.798733	0.631446	0.741709	-0.0397882	1	1.94974	0.0627384	0.517479	0.783824	-1.29633	0.569518	-0.509431	0.784169	-0.32924	0.879842
ANNAT4	AT2G38750	AT2G38750	-1.35545	0.168197	-1.36566	0.125549	-0.899463	0.266699	0.335501	0.758351	1.55348	0.0302105	-0.663162	0.405376	3.2309	1.67e-06	2.82064	0.000177659	0.430697	0.793845	3.21869	2.2e-06	3.55403	4.12e-07	3.05666	4.93e-05	0.146017	0.973967	1.75404	0.0988652	1.02876	0.440083
SVL2	AT1G66970	AT1G66970	-0.80936	0.352761	-0.729646	0.330443	-1.02252	0.0805239	-2.23774	6e-05	-2.05893	0.000120519	-2.29399	1.39e-05	-0.814262	0.259434	-0.989616	0.207685	-0.435334	0.710193	-1.47181	0.0121902	-1.30006	0.046121	-0.848645	0.324207	-1.05983	0.397442	-1.14061	0.196975	-0.866375	0.407791
DMR6	AT5G24530	AT5G24530	0.75723	0.601387	0.0477132	0.975903	-0.164199	0.875008	-2.43522	0.00259001	-3.55853	1.25e-06	-1.32059	0.0976435	-0.687005	0.569488	-0.95519	0.458616	-0.831743	0.565962	-1.5474	0.0728004	-0.461285	0.732525	-0.98245	0.443724	-2.7807	0.012544	-3.12382	0.00143938	-2.97921	0.00292483
PCAP1	AT4G20260	AT4G20260	0.584178	0.48419	2.03018	7.38e-05	2.52474	4.62e-08	-0.198776	0.799153	0.634962	0.237135	1.26528	0.0083339	-0.149912	0.897502	0.551379	0.514621	0.917204	0.208257	-0.584923	0.339386	0.186157	0.846924	0.903907	0.195585	-0.452095	0.767486	-0.372229	0.705263	-0.234676	0.837534
LQY1	AT1G75690	AT1G75690	0.363567	0.718147	-0.0274315	0.977857	-1.55781	0.0012945	-0.967394	0.0725658	0.97702	0.049225	-2.20318	1.99e-06	0.500444	0.477311	-0.451954	0.618993	-0.194706	0.875493	-0.00537586	1	-0.450742	0.539367	-0.609554	0.450053	0.398183	0.801646	0.108424	0.930087	-0.118422	0.925823
AT2G09990	AT2G09990	AT2G09990	0.892114	0.0837945	0.143459	0.832512	0.263199	0.581462	0.0645942	0.938418	-0.448508	0.311312	0.1136	0.820585	0.634955	0.200837	0.549096	0.372806	0.743647	0.208351	1.24831	0.0020105	0.766021	0.116078	0.646761	0.277917	0.384616	0.748668	-0.36231	0.632357	0.237201	0.786187
APG1	AT3G63410	AT3G63410	-0.195143	0.820858	-1.11825	0.00585428	-1.89567	6.03e-08	-0.629674	0.130715	0.0637287	0.903871	-1.74495	3.62e-07	-0.0794743	0.937286	-0.624439	0.229949	-0.549143	0.357745	-0.326882	0.505768	-0.714007	0.110012	-0.694094	0.180153	0.447733	0.653518	0.124937	0.886888	0.192781	0.815143
AT3G06355	AT3G06355	AT3G06355	2.91726	2.44e-10	3.3436	1.08e-13	3.23642	2.72e-13	1.68647	0.000483194	2.18363	1.08e-06	3.38532	4.79e-15	2.63963	3.17e-09	2.79424	1.58e-09	2.55202	1.5e-07	2.26424	7.83e-07	2.60039	2.74e-08	2.13958	2.08e-05	0.518523	0.70199	0.315484	0.747294	1.7379	0.00630024
CSP41A	AT3G63140	AT3G63140	0.0759295	0.965157	-0.769473	0.205549	-1.96712	2.68e-05	-0.715837	0.198909	0.905189	0.0648155	-2.00201	1.14e-05	0.13148	0.910878	-0.768677	0.26688	-0.640703	0.433145	-0.22109	0.7752	-0.669808	0.295643	-0.616053	0.430744	0.54649	0.674005	0.0702864	0.957623	0.0276204	0.986831
RAV2	AT1G68840	AT1G68840	0.339286	0.906827	0.906789	0.553709	0.119918	0.934966	-1.55848	0.208107	-0.166621	0.913346	-2.57523	0.0134345	-0.00330047	1	0.413897	0.879358	0.112189	0.970543	-0.461979	0.792496	2.76818	0.0194424	0.0722114	0.98376	-0.779796	0.828296	-0.363914	0.884555	-0.112398	0.972614
SYP122	AT3G52400	AT3G52400	0.398917	0.892667	0.343359	0.85807	0.902783	0.48665	-1.25273	0.367886	-1.91117	0.102117	0.0134215	0.99613	0.995466	0.559296	0.304327	0.9244	0.856035	0.713469	-0.785464	0.619115	2.64711	0.0392527	0.458728	0.858686	-1.91342	0.477024	-0.544107	0.819385	-0.683946	0.779728
AT4G19200	AT4G19200	AT4G19200	0.195597	0.823681	-0.449349	0.374989	-0.302938	0.48366	-0.0610189	0.937225	0.242946	0.589454	-1.45255	3.24e-05	0.902122	0.02663	0.235982	0.771509	-0.33395	0.651644	0.224348	0.683961	-0.101493	0.895686	-0.283127	0.695152	-0.435834	0.667563	-0.584935	0.355439	-0.986895	0.0898716
HSP70	AT3G12580	AT3G12580	2.41006	0.000275914	-0.0995178	0.929865	0.439536	0.551346	2.65892	1.44e-05	0.493609	0.49974	2.67357	4.13e-06	-0.487385	0.630038	-0.119723	0.950949	0.274284	0.859708	0.465064	0.595664	-0.704427	0.426012	0.647119	0.555738	-0.766769	0.653518	-0.165455	0.916232	1.04248	0.360365
AT3G51730	AT3G51730	AT3G51730	-0.163663	0.916297	1.40823	0.0270034	1.8185	0.000727249	0.94258	0.136181	0.901289	0.122813	0.561095	0.351475	-0.888184	0.19813	-0.992862	0.199336	-0.539835	0.615284	-1.44973	0.0126504	-0.681716	0.378041	0.275072	0.822999	-0.535169	0.748668	-0.502198	0.633879	-0.91602	0.368412
CYP83A1	AT4G13770	AT4G13770	-0.601084	0.736604	-1.66774	0.104592	-1.28659	0.155426	0.720671	0.520134	0.637633	0.524172	-0.481038	0.625116	0.115885	0.963516	0.0364515	0.989498	-0.483616	0.806203	0.278128	0.849865	-0.145374	0.936804	-0.355417	0.854492	-0.120756	0.984267	0.460692	0.795955	0.186329	0.934776
AT5G23900	AT5G23900	AT5G23900	0.258351	0.788772	-0.24709	0.71578	-0.78225	0.083571	-0.577801	0.264264	-1.00702	0.0196931	-0.760206	0.0837521	0.183131	0.831581	0.212169	0.838208	0.271305	0.780644	0.529802	0.318445	0.123072	0.889245	0.22062	0.816826	0.603956	0.590825	-0.0172176	0.987675	0.423069	0.624141
RPT2	AT2G30520	AT2G30520	0.15712	0.877195	0.872908	0.0613118	0.219701	0.646403	-0.367854	0.472346	0.39928	0.370941	-1.18642	0.00179191	-1.73969	4.44e-06	-0.403166	0.569662	-0.482416	0.488954	-0.532541	0.26144	-0.621321	0.22763	-0.508466	0.428358	-0.137245	0.944069	-0.272538	0.731002	-0.644324	0.372557
CML38	AT1G76650	AT1G76650	0.926335	0.693967	1.92459	0.194879	2.22209	0.0655642	-0.221886	0.921153	1.67381	0.183279	-0.444601	0.755951	4.34921	0.000151721	2.31299	0.140602	2.03035	0.251889	3.0392	0.0125928	3.7141	0.00336312	1.6443	0.371314	0.219716	0.976459	2.02378	0.300029	0.281531	0.926238
rps3 ATCG00800	ATCG00800	ATCG00800	0.801858	0.159415	0.591856	0.279784	-0.166945	0.751568	-0.287447	0.622503	0.483663	0.294673	-0.370741	0.423707	0.818031	0.0908584	0.851903	0.120981	0.604623	0.383942	0.256905	0.675925	0.287969	0.674655	0.606028	0.352932	0.470919	0.684259	0.705628	0.310965	0.718025	0.347021
CSR1	AT3G48560	AT3G48560	0.530552	0.0756038	-0.315497	0.311758	-0.915808	7.6e-05	0.296094	0.293313	1.08057	6.66e-07	-0.116745	0.676573	0.572588	0.023927	0.272164	0.48915	0.105271	0.857745	0.632364	0.00885573	0.223867	0.520874	0.233989	0.579175	0.399733	0.473691	0.104531	0.839135	0.0429217	0.945984
AT5G58420	AT5G58420	AT5G58420	-0.220416	0.8255	-0.903266	0.0746664	-0.959984	0.027007	-1.23923	0.0051123	-1.54184	0.000144473	-0.739946	0.0881972	-0.461238	0.447656	-0.355131	0.667792	-0.205062	0.844059	0.234493	0.718738	-0.222136	0.769013	-0.439152	0.560051	0.586085	0.598048	-0.228901	0.798652	0.345767	0.693112
GSTF12	AT5G17220	AT5G17220	2.75645	0.264141	1.21105	0.610667	2.32112	0.167432	6.09264	0.000266608	6.36972	1.97e-05	7.02976	1.37e-06	0.280963	0.956455	0.70557	0.858118	-0.252537	0.957399	2.39824	0.229888	2.29773	0.276918	0.794608	0.819855	1.28393	0.826209	3.02767	0.234351	1.55557	0.621634
AT3G04920	AT3G04920	AT3G04920	0.360318	0.672827	-0.157563	0.829114	-0.882509	0.0463365	-0.331399	0.56921	-0.387514	0.43324	-0.708643	0.107794	0.359693	0.592032	0.541308	0.434688	0.264317	0.787075	0.736203	0.130566	0.483154	0.429252	0.0917072	0.937236	0.531294	0.647995	0.254415	0.774937	0.310981	0.728828
MAPR2	AT2G24940	AT2G24940	0.518465	0.179185	0.476517	0.171762	0.882404	0.0011454	0.929596	0.000995657	1.60297	3.38e-10	0.837741	0.00171459	0.490535	0.141622	0.390283	0.361153	0.556805	0.166977	0.408804	0.211803	0.449187	0.211574	0.204179	0.707266	-0.118091	0.921973	-0.00939706	0.989818	0.0455972	0.953247
STV1	AT3G53020	AT3G53020	-0.0554599	0.961039	-0.445637	0.297965	-0.433737	0.222813	-0.377393	0.347202	-0.563773	0.095945	-0.150686	0.697677	0.14636	0.817559	0.0850306	0.928209	0.0826361	0.926706	0.426206	0.277767	0.146047	0.809415	-0.0350645	0.972996	0.57173	0.455838	-0.0594087	0.946208	0.356219	0.576476
TUA2	AT1G50010	AT1G50010	-0.0680232	0.981449	0.0620198	0.957449	-1.74498	0.00447587	-1.79312	0.00529909	-2.06329	0.000505082	-2.20146	0.000185591	0.0806412	0.966719	0.555824	0.631705	0.0658425	0.970543	0.326038	0.733611	0.148837	0.907942	0.464869	0.698328	0.578472	0.75882	0.800443	0.456837	0.766853	0.515605
RPL24	AT5G54600	AT5G54600	-0.140431	0.900188	-0.785633	0.121335	-1.42569	0.000395773	-1.03367	0.018944	-0.242968	0.632311	-1.98499	2.63e-07	0.0818601	0.943659	-0.512306	0.448528	-0.484065	0.514927	-0.294707	0.613609	-0.797538	0.115026	-0.492368	0.477399	0.680185	0.503326	0.435302	0.565545	0.309523	0.717978
CAM9	AT3G51920	AT3G51920	1.21202	0.0175601	0.981026	0.0522983	2.01599	7.15e-07	0.364182	0.524048	1.00041	0.0203775	0.510939	0.26508	0.990522	0.0382218	0.600154	0.365817	0.933818	0.119222	-1.45017	0.000810255	-0.158355	0.850702	-0.044281	0.974372	-0.354655	0.80015	-0.659255	0.369832	-0.152282	0.885529
AOC3	AT3G25780	AT3G25780	0.542112	0.825105	0.239372	0.896587	1.13564	0.326452	0.516647	0.74466	-0.149311	0.921427	-0.182462	0.893374	5.5701	8.77e-09	4.01234	0.000281291	2.13688	0.146547	2.68454	0.0133826	2.72884	0.019122	2.35678	0.0810108	-1.50298	0.579045	3.07653	0.0348139	0.336722	0.898007
ALDH7B4	AT1G54100	AT1G54100	-0.365863	0.762483	1.80432	0.00234686	2.73859	9.46e-08	3.14044	1.66e-09	3.51229	1.98e-12	2.88656	8.73e-09	-0.0926261	0.952714	-0.0331393	0.985392	0.05803	0.970558	0.486536	0.509897	0.222952	0.833609	0.515304	0.604561	-0.574734	0.721108	-0.257023	0.829145	-0.937113	0.354008
CB5-C	AT2G46650	AT2G46650	-0.51816	0.70404	-0.405801	0.695133	0.201287	0.816001	0.569858	0.519045	0.608534	0.426726	1.27389	0.0577811	1.95506	0.0047805	1.47711	0.0805931	0.429924	0.772985	2.33282	0.000452406	1.80784	0.0150869	1.83244	0.0243368	0.125799	0.976459	1.28939	0.226464	0.677799	0.61116
LIL3:2	AT5G47110	AT5G47110	0.506376	0.320408	0.026444	0.967692	-0.70873	0.0406571	-0.227377	0.630005	-0.102384	0.822091	-1.10077	0.00065653	0.10426	0.894852	0.246054	0.723283	0.0156494	0.98968	-0.260611	0.577288	-0.0461969	0.951999	-0.0703157	0.939308	-0.0599198	0.977972	0.424623	0.4704	-0.0175509	0.988106
AT4G22240	AT4G22240	AT4G22240	-0.996246	0.0212246	-0.0106847	0.988772	0.985334	0.00574045	0.411936	0.355623	1.67872	5.56e-07	1.25117	0.000245628	-0.710559	0.0889932	-0.895206	0.0422441	-0.676561	0.205093	-0.861615	0.0242267	-0.650002	0.150039	-0.455117	0.442022	-0.166622	0.910307	-0.158348	0.842503	-0.295974	0.690573
ACS6	AT4G11280	AT4G11280	0.369406	0.893137	-0.48065	0.77673	0.451866	0.726322	-0.391598	0.814987	0.627378	0.620839	1.8722	0.0747876	-0.253833	0.926094	-0.878833	0.662908	0.684206	0.765503	0.0111463	1	1.58001	0.246716	-0.486287	0.834438	-0.589484	0.881154	-1.18068	0.528487	0.316878	0.903224
AT4G16410	AT4G16410	AT4G16410	0.313763	0.698825	-0.292973	0.624781	-0.89427	0.0276663	-0.0781617	0.917934	0.317681	0.499041	-1.4258	0.000169592	-0.145532	0.866461	-0.027689	0.982881	0.0940751	0.933913	-0.289679	0.606562	-0.4055	0.490869	-0.0955615	0.927133	0.129777	0.949702	0.180999	0.837459	-0.0901808	0.93209
RPS28	AT5G64140	AT5G64140	0.605731	0.264768	0.00384655	0.996154	-0.0393385	0.940049	-0.220522	0.683468	-0.400073	0.335886	-0.0872462	0.854601	0.820435	0.0490037	0.825505	0.0788681	0.523547	0.399471	1.1411	0.00247955	0.901406	0.0338049	0.419942	0.508358	0.651206	0.459095	0.203753	0.794911	0.332448	0.664172
ORA47	AT1G74930	AT1G74930	3.30738	0.0437182	0.965928	0.630682	-0.392055	0.827213	3.77243	0.00615942	5.23603	3.14e-05	-0.978738	0.532815	2.60665	0.0888013	0.0974507	0.982149	2.33373	0.251427	2.15749	0.155865	2.81919	0.0754412	0.330626	0.92564	0.49391	0.93661	0.114999	0.976178	1.7776	0.481413
BTI1	AT4G23630	AT4G23630	-0.0493787	0.964498	0.0388636	0.94535	0.647752	0.0363177	0.460735	0.193546	0.375638	0.257586	0.435272	0.167982	-0.351765	0.406103	-0.52488	0.219497	-0.403436	0.436161	0.621035	0.0606419	-0.0160775	0.9855	0.0424662	0.962608	-0.564647	0.412605	-0.544832	0.275332	-0.354253	0.548918
LrgB	AT1G32080	AT1G32080	0.105666	0.918388	-0.518273	0.283512	-2.08808	3.7e-09	-0.0905281	0.886697	1.06907	0.00279509	-1.71134	8.05e-07	0.101981	0.910244	-0.234211	0.770456	-0.362414	0.610574	-0.225539	0.676096	-0.663101	0.149329	-0.417875	0.507433	0.378157	0.722253	0.14079	0.86642	-0.315501	0.679291
AOR	AT1G23740	AT1G23740	-0.396619	0.452884	-0.678388	0.0765245	-0.738099	0.0242085	0.113297	0.827574	1.26029	2.87e-05	-0.633468	0.0497	-0.318944	0.49478	-0.722539	0.0736434	-0.685383	0.128901	-0.682357	0.0474748	-0.836866	0.020281	-0.804219	0.0481179	0.28181	0.776243	0.149365	0.828782	0.123681	0.87239
VAR2	AT2G30950	AT2G30950	-0.154772	0.782117	-0.155758	0.688906	-0.189803	0.523654	0.071423	0.86375	1.03823	1.04e-05	-0.223405	0.42252	0.179479	0.670333	-0.100071	0.877339	-0.0932349	0.885516	0.0217565	0.983247	-0.143533	0.741147	0.168936	0.738182	0.147566	0.873271	0.0784217	0.899051	0.0475063	0.944135
AT4G27657	AT4G27657	AT4G27657	2.7609	3.13e-06	1.34811	0.0533062	1.84562	0.00184775	2.22908	0.00013607	3.80886	1.59e-12	1.92738	0.00081984	2.33749	4.26e-05	-0.388152	0.7661	3.19274	1.5e-07	2.02011	0.000560995	-0.0127382	0.996908	1.47079	0.0568872	0.374703	0.859487	-0.0946775	0.954659	1.72836	0.057998
LTP4	AT5G59310	AT5G59310	0.195744	0.976678	2.24127	0.295999	7.20463	9.68e-07	5.07843	0.000753936	10.0376	3.02e-12	10.8908	9.2e-15	-0.742529	0.805766	1.15072	0.741607	4.33219	0.0289166	-1.41102	0.506391	1.80628	0.432961	1.31481	0.675014	-4.26743	0.331406	2.18402	0.438877	0.55294	0.897547
CEV1	AT5G05170	AT5G05170	-0.889413	0.0673067	-1.10718	0.00939226	-1.60162	1.33e-05	-0.782427	0.0623948	-0.324141	0.464525	-2.03698	1.02e-08	-0.454182	0.387965	-0.151541	0.877712	-0.433948	0.53399	-0.4274	0.372784	-0.4027	0.466967	-0.302759	0.681046	0.00445207	1	0.590508	0.362694	0.319512	0.684122
AT1G27400	AT1G27400	AT1G27400	-0.0812056	0.971803	-0.827112	0.276352	-1.72214	0.00285991	-1.34033	0.0329771	-1.70416	0.00264274	-1.39942	0.0147287	-0.243893	0.834832	-0.155948	0.926058	-0.0987393	0.954729	0.208281	0.834474	-0.172787	0.882893	-0.128911	0.934489	0.669697	0.67188	-0.266055	0.834377	0.743594	0.501258
CHI	AT2G43570	AT2G43570	-1.3199	0.476368	0.901626	0.568721	0.703195	0.585087	0.21214	0.918354	-1.82214	0.109113	0.209962	0.881923	-2.31469	0.0672267	-0.894412	0.673429	-0.592942	0.816253	-2.5177	0.0330803	0.546186	0.78048	-0.409412	0.874685	-3.69568	0.029237	-4.01759	0.00514064	-2.6059	0.139967
EMB3113	AT2G33800	AT2G33800	0.386675	0.648061	-0.447343	0.469219	-1.77751	2.68e-05	-1.00547	0.0337639	-0.085074	0.892487	-1.83695	8.94e-06	0.272332	0.724898	-0.0785617	0.954793	-0.196952	0.85749	-0.0818358	0.928246	-0.502153	0.419402	-0.280624	0.755485	0.567183	0.626547	0.397402	0.632701	0.259579	0.786777
MYC2	AT1G32640	AT1G32640	0.99993	0.27202	0.347558	0.723462	0.490469	0.501393	1.66737	0.010497	1.83224	0.00241111	0.318994	0.664336	3.55789	5.31e-10	2.616	5.28e-05	1.27705	0.149455	2.73751	4.57e-06	2.54649	5.87e-05	2.16818	0.00188507	-0.663475	0.708354	1.01035	0.332305	0.330006	0.813253
AT3G60415	AT3G60415	AT3G60415	0.293708	0.908011	1.67449	0.141472	1.37344	0.164026	-0.472188	0.737862	-2.60237	0.00403971	-0.407568	0.711399	-0.369944	0.847155	-0.372261	0.876523	-0.326668	0.890781	-2.00668	0.0464333	0.353027	0.844896	-0.201992	0.935315	-1.93427	0.334278	-2.1587	0.125874	-1.95752	0.216836
BTF3	AT1G17880	AT1G17880	0.212431	0.777554	-0.368508	0.431998	-0.568459	0.112023	-0.144499	0.786374	-0.278568	0.480147	-0.630064	0.0655757	0.359492	0.45826	0.231997	0.747791	0.302197	0.653118	0.568282	0.139756	0.152418	0.808795	0.170186	0.820283	0.461855	0.60015	-0.06086	0.946634	0.28051	0.687531
HAI1	AT5G59220	AT5G59220	0.0818337	0.989298	2.7611	0.0325264	3.6359	0.000832286	5.81715	1.07e-07	4.88496	3.3e-06	4.09803	0.000103662	1.23055	0.451376	-0.465016	0.871893	-0.359319	0.902481	0.314439	0.880683	0.873903	0.623949	-0.019053	0.996268	-1.90056	0.529124	-1.18401	0.570614	-6.98234	0.000549554
FAD7	AT3G11170	AT3G11170	-0.700847	0.120071	-1.57617	5.57e-06	-2.52438	1.67e-14	-1.52591	4.54e-06	-0.63868	0.068737	-3.36059	1.09e-25	0.12363	0.86635	-0.606069	0.200636	-0.846613	0.0615068	-0.29444	0.519497	-0.33348	0.50878	-0.500024	0.34631	0.161288	0.906899	0.334411	0.595198	0.0797249	0.92848
GAD2	AT1G65960	AT1G65960	-0.247676	0.800508	-0.56798	0.324107	-1.39291	0.000996798	-0.0102206	1	0.728502	0.106477	-1.84068	5.76e-06	-0.135474	0.892354	-0.222267	0.828486	-0.360633	0.679648	0.103286	0.898764	-0.263766	0.719677	-0.325231	0.698359	-0.193287	0.914062	0.0876831	0.937836	0.145296	0.892781
DOGT1	AT2G36800	AT2G36800	1.07391	0.628708	-0.12266	0.955337	1.30263	0.314939	0.679943	0.690237	-1.88312	0.124567	2.3623	0.0420126	-3.55088	0.00480639	-1.72087	0.3266	-0.103401	0.976897	-1.91874	0.155899	0.927482	0.612108	0.734893	0.759441	-1.73622	0.558708	-3.32899	0.0457546	-1.46366	0.513553
FAD6	AT4G30950	AT4G30950	-0.143881	0.851188	-1.10658	0.000929795	-2.05613	3.83e-12	-0.69522	0.0397031	-0.0972172	0.816908	-1.86329	1.24e-10	-0.172954	0.759839	-0.454587	0.335543	-0.578394	0.212855	-0.392583	0.302326	-0.660418	0.0749837	-0.500591	0.285239	0.38699	0.646235	0.560405	0.272606	0.395815	0.506609
RHL41	AT5G59820	AT5G59820	1.02763	0.55255	0.3145	0.850786	1.37729	0.189913	0.147192	0.944705	-0.250207	0.85318	0.727426	0.507601	2.02973	0.0670253	-0.47643	0.83987	1.94905	0.166349	1.64936	0.136164	2.72219	0.0115849	1.02534	0.54839	-0.594191	0.866048	-0.922674	0.613274	0.519137	0.811768
AT1G74050	AT1G74050	AT1G74050	0.0480078	0.972436	-0.297194	0.557169	-0.897272	0.0100828	-0.885128	0.0165589	-1.12632	0.000793208	-0.94255	0.00536237	-0.195702	0.756224	0.0618534	0.954793	-0.0308339	0.976897	0.00264288	1	-0.104051	0.882035	-0.115373	0.893323	0.547277	0.528262	0.141825	0.855469	0.451899	0.492627
PPa6	AT5G09650	AT5G09650	0.165645	0.869954	-0.213605	0.733273	-1.25001	0.00144527	-1.03229	0.0136852	-0.183373	0.716384	-0.75982	0.0583193	0.528669	0.312444	0.225097	0.806202	0.164046	0.869569	0.480581	0.325047	0.353184	0.557825	0.23411	0.780291	0.578299	0.56387	0.70198	0.281231	0.409497	0.60326
PRPS20	AT3G15190	AT3G15190	0.533133	0.48419	-0.362743	0.585168	-1.56631	0.000362219	-0.555126	0.311466	0.247153	0.656915	-1.78505	2.74e-05	0.723101	0.193485	0.231586	0.828486	-0.0359703	0.979308	0.437509	0.457427	-0.053219	0.959303	0.105804	0.928763	0.688418	0.541647	0.570097	0.469829	0.287468	0.767372
AT3G53740	AT3G53740	AT3G53740	0.706006	0.218816	0.122716	0.860736	-0.124393	0.811964	0.107621	0.875212	-0.19034	0.710618	0.0490914	0.928485	0.609769	0.233824	0.418471	0.560186	0.525065	0.448381	0.693756	0.129801	0.498182	0.375412	0.336063	0.662962	0.560067	0.594401	0.0514284	0.962611	0.443734	0.57506
AT3G21670	AT3G21670	AT3G21670	0.963709	0.12702	0.413637	0.547841	0.873274	0.0769779	0.730797	0.185325	1.18036	0.0121192	0.752315	0.122865	-0.278218	0.743627	-0.791896	0.244937	-0.319964	0.759436	0.685545	0.221039	-0.31615	0.688492	0.0519293	0.972505	-0.400691	0.791138	-0.479903	0.584193	-0.732237	0.409617
AT4G36500	AT4G36500	AT4G36500	-0.285543	0.886697	-0.213107	0.871055	1.13659	0.164633	-0.865317	0.36086	-1.05964	0.197351	-0.55053	0.525188	1.64806	0.0553105	1.09586	0.344859	1.55928	0.152353	0.156414	0.917887	1.15988	0.24713	1.00135	0.416947	-0.752208	0.741489	0.281386	0.873334	0.860222	0.563716
UBC28	AT1G64230	AT1G64230	0.719283	0.0521848	0.755451	0.0255472	1.13186	6.1e-05	0.57473	0.080514	0.0477919	0.911011	-0.386459	0.213652	0.0548315	0.946356	0.261839	0.641216	0.326966	0.546376	-0.587415	0.0708161	0.0587126	0.926093	0.0758731	0.922312	-0.455377	0.540429	0.189835	0.753339	-0.0888623	0.90485
SAG13	AT2G29350	AT2G29350	-0.789132	0.762983	1.64314	0.280158	1.71047	0.168491	2.29876	0.0774538	-2.18823	0.0698479	-0.176926	0.908021	-1.29398	0.451952	-1.28361	0.523712	-1.10777	0.623964	-1.73213	0.223167	2.10007	0.147917	-0.604291	0.813066	-2.88236	0.240293	-3.32269	0.0494867	-2.85517	0.126379
AT3G14600	AT3G14600	AT3G14600	-0.134988	0.918305	-0.41275	0.539657	-1.21566	0.00915593	-0.896314	0.0854263	-1.74437	8.38e-05	-1.40197	0.00181681	-0.321509	0.687329	-0.2414	0.827208	-0.293348	0.780377	0.064379	0.954727	-0.299872	0.701208	-0.359331	0.691581	0.558177	0.657858	0.016086	0.989637	0.455362	0.625601
AT1G73230	AT1G73230	AT1G73230	-0.0260664	0.988906	-0.171904	0.772629	-0.879917	0.016719	-0.814733	0.0396097	-1.21337	0.000534011	-1.29069	0.000194225	0.0901997	0.924321	0.187803	0.82796	0.102707	0.916842	0.206456	0.707927	-0.0129122	0.992147	0.00651439	0.995953	0.570506	0.530408	0.294333	0.678385	0.400687	0.573069
ELIP1	AT3G22840	AT3G22840	-0.265744	0.886729	0.612705	0.551776	0.955111	0.216058	0.679868	0.455273	1.94579	0.00498425	4.8012	5.55e-14	-2.25363	0.00219706	-1.85766	0.0307507	-2.45203	0.00464125	-1.79667	0.0165199	-0.965596	0.316294	-0.916883	0.432476	-0.174451	0.967239	0.686263	0.602667	0.308801	0.854446
AT3G61870	AT3G61870	AT3G61870	-0.333045	0.705626	-1.16264	0.0182024	-1.86867	7.92e-06	-0.663579	0.18759	0.318617	0.5351	-1.92154	2.52e-06	0.0146642	1	-0.550703	0.428467	-0.601449	0.40975	-0.307385	0.614249	-0.711177	0.20086	-0.66585	0.312601	0.325133	0.82567	0.258351	0.772431	0.183593	0.858528
AT5G67510	AT5G67510	AT5G67510	1.34112	0.00153789	0.497	0.331626	0.558871	0.177284	-0.483117	0.303381	-1.36972	0.000194148	-0.043175	0.934263	1.02568	0.0123926	0.958385	0.0395551	0.959511	0.058302	1.66856	6.97e-06	1.15796	0.00556591	0.861688	0.0880263	0.557799	0.571263	-0.289879	0.704013	0.312789	0.693112
CCR1 AT4G39260	AT4G39260	AT4G39260	0.65163	0.106021	0.503983	0.19361	0.0243044	0.95633	0.277628	0.488808	-0.0146319	0.980806	0.842256	0.00453192	1.01535	0.00105062	0.883748	0.012851	0.878929	0.0221628	1.99499	1.62e-12	1.4424	2.49e-06	1.65329	6.61e-08	0.58403	0.390205	-0.0624132	0.937836	0.273385	0.665528
AGP1	AT5G64310	AT5G64310	1.90848	0.126005	0.6102	0.671315	1.95351	0.0416196	0.68657	0.594189	1.76662	0.0676831	3.35593	0.000152601	2.44568	0.0149321	1.82148	0.149034	2.85747	0.012379	1.06495	0.364474	2.85971	0.00507361	1.18965	0.438109	0.00102318	1	0.774884	0.670425	0.289064	0.902756
BIP1	AT5G28540	AT5G28540	-0.557567	0.683172	-0.541082	0.589648	-0.65305	0.397296	-0.805518	0.336121	-1.59014	0.0193446	-0.658146	0.374429	-0.37455	0.762726	-0.281586	0.871075	-0.0326617	0.989342	0.31975	0.771998	0.34048	0.782294	0.419535	0.766298	-0.301599	0.915	-1.62128	0.114382	-0.967778	0.444766
SEP1 AT4G34190	AT4G34190	AT4G34190	0.0412259	0.964498	-0.370016	0.265699	-0.849914	0.000634773	-0.191418	0.580018	0.338057	0.219218	-1.21839	2.85e-07	0.257834	0.486048	-0.329625	0.415125	-0.209961	0.685629	-0.051636	0.918687	-0.384186	0.251184	-0.192886	0.696741	0.310101	0.653518	0.0677283	0.916193	-0.164999	0.762518
AT1G36730	AT1G36730	AT1G36730	-0.225207	0.771831	-0.396114	0.41062	-0.0416362	0.932396	-0.202792	0.694485	-1.82858	1.67e-08	0.571752	0.110847	0.0160942	1	0.0479531	0.964827	-0.185273	0.824889	0.227435	0.654961	-0.0182401	0.985745	0.0327058	0.977008	0.0608159	0.9791	-0.0712097	0.937826	0.144174	0.863221
DiT1	AT5G12860	AT5G12860	-0.650943	0.188795	-0.878749	0.0326855	-0.865811	0.0163566	-1.33194	0.000174398	-0.352572	0.382082	-1.18639	0.000511081	-0.358637	0.489304	-0.675544	0.162121	-0.623935	0.2501	-0.359168	0.434769	-0.837757	0.0414683	-0.872808	0.0555663	0.0806485	0.969999	-0.310661	0.648566	-0.528063	0.42881
AT1G52000	AT1G52000	AT1G52000	-0.132077	0.965662	0.515788	0.694148	-1.14515	0.217119	3.17443	0.000137342	3.78183	1.41e-06	1.39533	0.102229	2.0101	0.0284459	1.91992	0.0686859	0.102735	0.966662	4.23255	9.75e-08	4.20428	4.02e-07	3.42756	0.000129086	-1.02172	0.656176	1.84588	0.158989	0.841302	0.615239
THFS	AT1G50480	AT1G50480	-0.00787338	1	0.105216	0.88158	-0.457366	0.311222	0.364224	0.494341	-0.800182	0.0538083	-0.119548	0.812691	-0.278709	0.690773	0.601892	0.32295	-0.00389648	0.997898	-0.31101	0.584498	0.0538275	0.953776	0.125886	0.900441	-0.390438	0.749203	0.472095	0.514135	0.14375	0.884884
AT1G78020	AT1G78020	AT1G78020	0.0467819	0.98417	-0.630923	0.323017	-0.340158	0.549849	0.23472	0.748533	0.171386	0.786155	-1.64169	0.000357018	-1.26611	0.0135341	-0.585366	0.457909	-0.583229	0.494321	-0.66207	0.246882	-0.517036	0.454542	0.0166587	0.990388	-0.18635	0.932107	0.190161	0.859332	0.448652	0.645902
CYP81D8	AT4G37370	AT4G37370	-0.635333	0.816693	-0.109112	0.959203	1.24909	0.329883	-1.14803	0.444705	-3.73952	0.000839303	2.41035	0.0342246	-0.85611	0.661508	-0.689376	0.790157	-0.21893	0.947898	-2.39313	0.0672039	2.48179	0.0666407	-0.849878	0.704799	-1.74742	0.55979	-2.11518	0.258492	-1.53322	0.480191
AT2G42760	AT2G42760	AT2G42760	2.2043	0.0205396	1.10463	0.297701	1.30038	0.126261	3.09736	8.8e-05	3.48302	3.33e-06	0.946593	0.267829	5.0344	4.95e-12	3.27222	0.000102027	1.67156	0.140977	2.88704	0.000259012	2.42865	0.00532941	2.06283	0.0381303	-0.128546	0.981575	1.75255	0.16126	0.105702	0.964086
IDA	AT1G68765	AT1G68765	1.71062	NA	0.362491	NA	2.59872	NA	-0.934141	NA	-5.60978	NA	1.83447	NA	1.08201	NA	-0.445087	NA	1.5345	NA	-0.689024	NA	5.42576	NA	-0.318069	NA	-2.43678	NA	-2.23803	NA	0.335354	NA
AT4G02530	AT4G02530	AT4G02530	-0.0954165	0.932234	-0.806407	0.0790666	-1.61083	1.42e-05	-0.545406	0.228176	0.491555	0.238045	-1.51601	3.05e-05	0.235709	0.726907	-0.185911	0.841559	-0.348358	0.647362	0.032187	0.984709	-0.265669	0.671916	-0.281488	0.707146	0.444311	0.669546	0.334032	0.648211	0.0942666	0.923812
THM1	AT1G03680	AT1G03680	-0.297633	0.642561	-0.691961	0.0848592	-0.773886	0.0228773	0.00445319	1	0.700503	0.0379183	-1.18593	0.000198457	0.0515536	0.95735	-0.561765	0.237734	-0.230117	0.751974	-0.234067	0.619387	-0.569257	0.179465	-0.404842	0.467141	0.278141	0.794866	0.0217825	0.980983	0.130942	0.869615
AT1G04480	AT1G04480	AT1G04480	0.938391	0.0465651	0.26376	0.646047	0.219061	0.63334	-0.165177	0.781236	-0.628061	0.114453	0.0783374	0.873942	0.656048	0.151693	0.684043	0.191586	0.724284	0.192092	1.13701	0.00327666	0.768742	0.0910817	0.545151	0.356963	0.521281	0.598819	-0.117688	0.899891	0.141482	0.877935
AT1G57860	AT1G57860	AT1G57860	-0.0922643	0.950503	-0.973634	0.0729848	-0.927255	0.0494604	-1.12593	0.0207296	-1.51852	0.000539197	-0.293216	0.575923	-0.290967	0.716677	-0.286917	0.773651	-0.201056	0.85969	0.108736	0.899299	-0.201524	0.813789	-0.487519	0.541515	0.700582	0.540429	-0.216762	0.824975	0.199605	0.853114
HB-7 AT2G46680	AT2G46680	AT2G46680	0.187554	0.940355	2.50691	0.00429962	2.60362	0.000784205	4.40186	9.78e-09	4.64081	2.75e-10	3.21798	1.64e-05	-0.950992	0.402177	-0.471313	0.798573	0.283134	0.890781	0.945452	0.345471	1.17553	0.270075	0.70138	0.639892	-1.0322	0.638527	-0.397552	0.818432	-1.72201	0.212758
FIB1	AT5G52470	AT5G52470	-0.711448	0.339963	-0.846959	0.159652	-1.02169	0.0407486	-0.289799	0.678926	-1.17435	0.0146587	0.266656	0.637916	-0.303109	0.723141	-0.256942	0.821034	0.00109646	0.999737	0.276414	0.704587	-0.301866	0.71149	-0.137955	0.912174	0.634275	0.620981	-0.415462	0.653921	0.572998	0.541525
AT4G00810	AT4G00810	AT4G00810	0.264353	0.796595	-0.472288	0.456479	-0.559252	0.264499	-0.504566	0.372917	-1.57063	0.000292259	-0.9081	0.0459741	0.575701	0.345981	-0.0809556	0.954793	0.00533627	0.997594	0.551811	0.323329	-0.128991	0.889343	-0.215962	0.830471	0.702882	0.536734	0.160937	0.879129	0.268954	0.785956
AT4G27280	AT4G27280	AT4G27280	1.2558	0.359137	0.845268	0.497515	1.91285	0.0331516	0.750091	0.520132	1.34632	0.149007	0.860039	0.37262	0.531092	0.734456	-0.670542	0.707012	2.8535	0.00664779	0.40722	0.776558	0.75355	0.579681	1.72503	0.158407	-0.49643	0.881537	-0.896982	0.581014	1.87225	0.215455
PAL1	AT2G37040	AT2G37040	1.00717	0.370259	0.0826961	0.951413	-0.857552	0.281899	-1.44975	0.0673283	0.615986	0.459635	2.12306	0.00206369	0.18645	0.918391	-0.60214	0.667098	-0.852126	0.508155	0.168419	0.901201	-0.181503	0.9032	-0.309481	0.849381	0.189552	0.964808	0.407031	0.786416	-0.126495	0.94824
AT2G34250	AT2G34250	AT2G34250	-0.175713	0.811723	-0.266127	0.565721	-0.0137719	0.976536	-0.407636	0.289965	-1.14567	0.000154737	-0.586033	0.0675772	0.490651	0.218873	-0.0508337	0.959213	0.0485539	0.959137	0.543654	0.131334	0.186323	0.733162	0.0550144	0.950679	-0.208766	0.855142	-0.498249	0.355439	-0.653716	0.237367
HB-12	AT3G61890	AT3G61890	0.363593	0.843004	2.15504	0.010795	2.41172	0.00103108	2.87842	0.000134309	3.49786	7.13e-07	2.77647	9.57e-05	0.348195	0.813084	-0.461954	0.786523	-0.777811	0.586434	-0.283049	0.826741	0.316451	0.827262	0.196298	0.920832	-1.05278	0.597069	-0.651937	0.656069	-1.99454	0.0976934
AVA-P1	AT4G34720	AT4G34720	-0.0693158	0.923772	-0.269505	0.452752	0.0768198	0.816971	-0.530607	0.0594472	0.00355835	1	-0.328698	0.224297	0.00684032	1	0.0102205	0.990102	-0.0259552	0.972002	-0.0599306	0.901532	0.0574337	0.91568	-0.187264	0.708492	-0.0525677	0.973967	0.370684	0.396322	-0.219916	0.677902
AT1G56045	AT1G56045	AT1G56045	0.966408	0.0268205	0.884033	0.0335504	0.669998	0.0740814	0.610653	0.137409	0.811361	0.0251631	0.216131	0.604573	1.17381	0.00133516	1.18507	0.00319545	0.958373	0.0383062	1.23003	0.000644965	1.22614	0.00141117	0.736036	0.135018	0.472231	0.622443	0.333906	0.624892	0.20501	0.796883
mMDH1	AT1G53240	AT1G53240	-0.0172026	0.997972	-0.858192	0.129298	-0.849738	0.0764874	-0.949728	0.0602501	-0.290226	0.603947	-0.706985	0.13641	0.136051	0.901299	-0.0358992	0.980508	-0.110558	0.932197	0.153833	0.847308	-0.0290461	0.982175	-0.312515	0.733939	0.340776	0.828072	-0.114653	0.921169	-0.090419	0.941141
HSD2	AT3G47350	AT3G47350	0.349463	0.533445	0.197867	0.686081	-0.169035	0.664625	0.332649	0.411321	-1.19507	7.68e-05	-0.852332	0.00594912	0.308212	0.515651	0.340943	0.539268	0.14935	0.84918	0.176985	0.717217	-0.109097	0.862564	0.244425	0.691581	0.152308	0.906814	0.667389	0.177812	0.441481	0.454242
AT3G02480	AT3G02480	AT3G02480	3.00729	0.249319	4.63401	0.00162374	4.41144	0.000163073	7.7248	4.3e-06	10.3132	2.71e-17	4.81141	2.45e-05	1.99133	0.453809	1.2263	0.655965	2.33809	0.190954	2.12023	0.347407	6.16203	6.64e-06	1.38786	0.506268	-0.589335	0.964808	0.763504	0.807185	-0.17029	0.962335
AT2G46600	AT2G46600	AT2G46600	0.507195	0.647884	0.758205	0.320326	1.1944	0.0414194	1.27811	0.0402823	0.158551	0.84078	-0.196012	0.781139	1.08095	0.108719	0.0926935	0.95901	0.295218	0.831144	0.957607	0.144244	0.767614	0.326195	0.731702	0.433914	-0.92747	0.512832	-0.379513	0.743664	-0.00889808	0.996827
AT1G54500	AT1G54500	AT1G54500	-0.217197	0.823135	-0.507511	0.363332	-0.890491	0.0350167	-0.418294	0.424577	0.833673	0.0465151	-1.24439	0.00177547	-0.24259	0.741185	-0.441819	0.541201	-0.352856	0.671456	-0.59903	0.217079	-0.847855	0.0861765	-0.772813	0.184991	0.0332986	0.995187	-0.0098139	0.993232	-0.228339	0.802707
EBP	AT3G16770	AT3G16770	0.144464	0.944907	1.90223	0.0107945	1.11375	0.112772	1.58564	0.0267499	1.77707	0.0068619	-0.518718	0.488258	-0.578366	0.576334	-0.453199	0.753311	0.22843	0.895071	-1.71975	0.0142624	-0.588062	0.565273	0.117929	0.950081	-2.11405	0.0350272	-1.22467	0.264214	-1.11847	0.360365
SZF1	AT3G55980	AT3G55980	0.40235	0.882297	-0.16436	0.930918	0.793438	0.517193	-0.417938	0.8	0.10194	0.94925	0.920089	0.423944	0.720148	0.685107	-0.167362	0.959149	0.907374	0.664788	-0.621688	0.688005	1.86276	0.152669	-0.353617	0.89155	-0.88014	0.791138	0.146883	0.959613	0.391609	0.877096
RPS11-BETA	AT5G23740	AT5G23740	0.378146	0.689879	-0.0771001	0.928305	-0.857697	0.0799342	-0.899247	0.0859797	-0.771284	0.11819	-1.3054	0.00414952	0.194778	0.837313	0.298873	0.770495	0.241809	0.830905	0.468426	0.442539	0.248917	0.765018	0.0150918	0.991315	0.651642	0.593832	0.23771	0.811198	0.490669	0.596935
RPS1	AT5G30510	AT5G30510	0.153649	0.845616	-0.50959	0.220824	-1.06683	0.000858272	-0.208222	0.652144	0.354872	0.327279	-0.98232	0.00178779	0.325534	0.493276	-0.108783	0.900553	-0.142889	0.859891	0.0524753	0.942485	-0.264967	0.602417	-0.122703	0.875583	0.423364	0.622549	0.319669	0.595099	0.408995	0.511361
AT2G32060	AT2G32060	AT2G32060	0.151921	0.892667	-0.587116	0.294932	-0.881948	0.0442532	-0.725235	0.134357	-0.955099	0.0254408	-0.33497	0.4824	0.194421	0.81402	0.316388	0.714272	0.0839001	0.946201	0.736858	0.12525	0.355469	0.589602	-0.0840394	0.943213	0.691485	0.507348	0.109462	0.918261	0.229802	0.808694
CLA1	AT4G15560	AT4G15560	-0.528674	0.369422	-0.57803	0.23342	-2.21164	5.86e-10	-0.696317	0.0985103	0.413258	0.324317	-2.21332	2.15e-10	-0.483913	0.336989	-0.706684	0.169121	-0.718171	0.194582	-0.490561	0.281512	-0.87925	0.0435421	-0.879322	0.0714791	0.111726	0.959233	0.272229	0.71821	-0.141719	0.87659
AT5G14730	AT5G14730	AT5G14730	-0.563821	0.876833	0.673257	0.749721	-0.0333161	0.986897	-0.653035	0.76046	-3.02175	0.0287662	0.357906	0.830781	2.5445	0.106304	-0.233929	0.954793	0.772391	0.801577	0.727109	0.728763	5.33445	6.97e-05	1.13829	0.649683	0.994443	0.830358	-1.28094	0.607799	0.0130998	0.997955
mtHsc70-1	AT4G37910	AT4G37910	-0.616788	0.584524	-0.720928	0.389809	-1.50172	0.016726	-0.407045	0.640763	-1.97582	0.000886357	0.478522	0.488116	0.343131	0.759285	0.154272	0.931462	0.446455	0.734343	1.03376	0.140878	0.550573	0.55507	0.376941	0.769413	0.914115	0.557474	-0.305311	0.815302	0.976261	0.387775
PR5	AT1G75040	AT1G75040	0.46052	0.881341	-0.66085	0.723462	-1.61614	0.207915	-1.42793	0.32681	-6.00445	1.01e-07	-2.53381	0.0308773	0.275531	0.931284	-0.30529	0.929479	-0.430889	0.886657	-0.0335917	1	-0.112989	0.969272	-1.24948	0.546535	-1.27112	0.705832	-2.20566	0.252665	-3.31911	0.0661367
AT4G36130	AT4G36130	AT4G36130	0.26655	0.807343	-0.502243	0.450093	-1.08654	0.0258106	-0.893894	0.0950325	-1.73497	0.000135887	-0.368383	0.492206	-0.285868	0.737432	0.0190335	0.990053	0.16311	0.895071	0.599262	0.304425	0.0672884	0.950304	0.150927	0.898672	0.588909	0.648275	-0.1499	0.898078	0.337411	0.736636
PRPL11	AT1G32990	AT1G32990	0.383913	0.692863	-0.63437	0.326298	-2.12318	5.99e-06	-0.774291	0.164428	0.679705	0.18972	-2.13228	3.16e-06	0.465978	0.513546	-0.182215	0.885167	-0.249709	0.830866	0.187071	0.818979	-0.168229	0.860512	-0.345586	0.716897	0.515071	0.70735	0.375566	0.693813	0.161682	0.893544
TUF	AT4G11150	AT4G11150	0.184041	0.576516	0.322295	0.155171	0.588346	0.000938683	0.160178	0.500979	0.810795	1.77e-06	0.774978	5.06e-06	0.45813	0.0194472	0.373414	0.116757	0.302256	0.28476	0.413538	0.0324186	0.511539	0.0109144	0.149899	0.667659	-0.0983636	0.887006	-0.216521	0.50569	-0.330701	0.318752
AT2G36170	AT2G36170	AT2G36170	0.629452	0.385746	0.154493	0.8432	0.0518271	0.935576	-0.196384	0.785816	-0.685912	0.158711	-0.108429	0.852918	0.654327	0.268854	0.704141	0.298057	0.813025	0.239465	0.923882	0.0649426	0.713631	0.232078	0.543105	0.479148	0.616893	0.609315	-0.0182915	0.987675	0.448637	0.624209
ADC2	AT4G34710	AT4G34710	0.866623	0.425862	-0.0108951	0.994461	0.749298	0.311623	0.91906	0.249436	1.04806	0.136742	1.66919	0.0101835	3.1401	7.24e-07	0.823652	0.450088	-0.37775	0.807995	3.49502	3.16e-08	1.67017	0.0275665	1.00109	0.326852	0.0676974	0.990614	0.314386	0.827393	-1.32734	0.254854
AT5G20700	AT5G20700	AT5G20700	-0.00621225	1	-0.282023	0.76333	0.130592	0.865423	1.07188	0.0980354	0.418756	0.542363	-0.195091	0.783936	-0.619967	0.453737	0.0906171	0.960842	0.0661661	0.969291	0.422279	0.603137	0.4984	0.574867	0.0694327	0.969259	-0.970516	0.492189	-0.34204	0.774937	-0.943214	0.373293
OPCL1	AT1G20510	AT1G20510	-0.199571	0.930783	-0.862679	0.432193	0.0410467	0.9723	0.199311	0.883366	-0.337857	0.739344	-0.404487	0.665148	3.95643	9.41e-08	1.99172	0.0365986	0.411927	0.827609	1.4839	0.0895392	1.28772	0.203372	0.943086	0.474667	-0.659362	0.794948	1.17191	0.384168	0.304309	0.872671
AT1G71500	AT1G71500	AT1G71500	-0.31391	0.569679	-0.654311	0.0747315	-1.23126	3.89e-05	-0.579934	0.0903161	0.343879	0.312481	-1.31873	5.9e-06	-0.0492036	0.955505	-0.54661	0.201397	-0.368894	0.503973	-0.46629	0.191835	-0.82566	0.0163807	-0.612234	0.152255	0.27091	0.776217	0.0849821	0.912203	0.180509	0.789503
2-Cys Prx B	AT5G06290	AT5G06290	-0.0274285	0.99128	-0.755964	0.170599	-2.31568	4.9e-08	-1.05919	0.0243133	-0.0539205	0.934852	-2.58157	3.81e-10	0.471712	0.451952	-0.329553	0.712664	-0.562458	0.461438	0.226098	0.743084	-0.32472	0.646938	-0.66606	0.32469	0.593645	0.605204	0.296447	0.737844	0.078976	0.946872
AT2G30620	AT2G30620	AT2G30620	-0.704201	0.222616	0.0976736	0.890988	-0.169362	0.737274	-0.839177	0.0593676	-0.184423	0.721468	-0.611844	0.143858	-0.90519	0.0458534	-0.797139	0.141685	-0.200197	0.839441	-0.352998	0.517446	-0.132477	0.869632	-0.274781	0.734336	-0.0623712	0.98248	-0.717738	0.282433	-0.605655	0.423244
AT1G13520	AT1G13520	AT1G13520	0.665068	0.908408	4.03146	0.060715	2.64682	0.165151	-0.555632	0.883126	-3.29385	0.157329	2.33116	0.212996	0.206226	0.981999	0.623858	0.899191	0.314318	0.95196	0.0270696	1	8.24187	6.64e-06	1.28282	0.714085	-17.2572	2.71e-14	-0.709464	0.872251	-1.79581	0.618235
LOX4	AT1G72520	AT1G72520	0.238788	0.949567	-0.393787	0.845106	1.09967	0.412731	-0.433981	0.819471	-0.30484	0.851832	0.577369	0.678473	4.63768	4.89e-05	2.97047	0.0365888	1.5547	0.437821	1.04085	0.507892	3.37238	0.00909931	1.10191	0.606136	-2.37403	0.350569	2.03802	0.294255	0.375125	0.89951
AT3G23390	AT3G23390	AT3G23390	-0.0239107	0.991811	-0.472085	0.405944	-0.702735	0.106942	-0.681549	0.150465	-0.68527	0.113836	-0.590261	0.171078	0.233461	0.754171	0.0761195	0.953486	-0.1012	0.930618	0.45014	0.389	0.162569	0.838882	-0.336383	0.671037	0.593429	0.576888	0.0340212	0.977369	0.345663	0.684122
OHP2	AT1G34000	AT1G34000	-0.58609	0.121776	-0.835739	0.00897765	-0.932715	0.000904374	-0.727351	0.0160819	0.186882	0.588138	-1.20557	7.6e-06	-0.706808	0.0226351	-1.14865	0.000152326	-0.86131	0.0149051	-1.12522	5.79e-05	-1.35715	2.29e-06	-1.20874	8.71e-05	0.0924967	0.949664	-0.0918398	0.894867	-0.081598	0.910542
PSB28	AT4G28660	AT4G28660	0.171234	0.888168	-0.732382	0.215881	-1.34682	0.00352844	-0.839295	0.106102	0.299297	0.592753	-1.51969	0.000651752	0.235133	0.78228	-0.307866	0.757235	-0.183955	0.87587	0.0102858	1	-0.331107	0.659512	-0.543279	0.487216	0.606394	0.61948	0.33462	0.718028	0.213756	0.843334
HIR2	AT3G01290	AT3G01290	0.448485	0.871379	0.793687	0.621728	0.896242	0.472818	-5.01405	3.1e-06	-6.23477	1.04e-09	-0.808634	0.504452	1.28848	0.38465	0.65511	0.786259	0.710687	0.764938	-1.86702	0.126614	0.883643	0.600391	0.411253	0.87293	-2.02642	0.40129	-0.886116	0.671531	-0.655266	0.781009
PKT3	AT2G33150	AT2G33150	-0.384503	0.567777	1.00609	0.0164249	1.90491	4.37e-08	0.125923	0.837272	-0.69137	0.0719195	1.25562	0.000362169	-0.0894831	0.928766	-0.49525	0.396642	-0.0785588	0.941788	-0.339061	0.495739	-0.188432	0.778884	0.180156	0.827179	-0.515872	0.598048	-0.925786	0.0964966	-0.969687	0.099172
AT3G05730	AT3G05730	AT3G05730	1.11474	0.694922	0.472705	0.84384	-1.68593	0.282157	-3.02302	0.0499228	-1.84491	0.227965	-5.21471	0.000222582	1.0072	0.670918	-1.23361	0.645655	-3.52242	0.0628435	-0.479263	0.844629	-0.954752	0.681159	-2.17424	0.311851	0.533604	0.935894	0.312594	0.930087	-0.653478	0.842462
AT5G36790	AT5G36790	AT5G36790	-0.291012	0.740348	-1.02221	0.0326499	-1.81287	5.04e-06	-0.53293	0.285927	0.440066	0.342588	-2.5997	1.15e-11	-0.121711	0.902154	-0.732864	0.204355	-0.674647	0.29709	-0.434824	0.411044	-0.916795	0.0594975	-0.791394	0.173698	0.259765	0.860905	-0.0113386	0.991782	-0.0677564	0.953191
SUC1	AT1G71880	AT1G71880	0.54333	0.718198	-0.434691	0.700972	-0.370789	0.678426	-1.106	0.193022	-0.455752	0.606993	-0.404533	0.633525	1.36546	0.109544	0.237983	0.904937	0.00627451	0.99798	1.68902	0.0290028	1.17539	0.210087	0.419404	0.785708	-0.0717449	0.991389	-0.672633	0.625095	-0.886244	0.527472
CYP89A2	AT1G64900	AT1G64900	-0.629067	0.530611	-0.626442	0.426084	-0.42042	0.53309	0.0498489	0.978399	-1.70128	0.00212324	0.0259423	0.976451	0.101774	0.948752	-0.327883	0.801412	-0.330213	0.803454	0.559089	0.452623	-0.344986	0.72235	-0.0128754	0.994441	-0.123752	0.971398	-0.264511	0.829445	0.117142	0.939241
PGLP1	AT5G36700	AT5G36700	-0.299555	0.729993	-1.03164	0.030911	-1.81418	4.94e-06	-0.536182	0.282017	0.438326	0.344511	-2.62384	7.29e-12	-0.131065	0.891307	-0.738967	0.199819	-0.683598	0.288143	-0.44736	0.393278	-0.918049	0.0589572	-0.794313	0.171378	0.256831	0.862228	-0.00451434	0.998529	-0.0694976	0.950888
AT4G01310	AT4G01310	AT4G01310	0.423125	0.661331	-0.525953	0.445162	-2.232	2.56e-06	-0.918011	0.0967189	-0.136256	0.84078	-2.27015	9.47e-07	0.370806	0.646695	-0.151079	0.913913	-0.214368	0.860948	0.0192267	1	-0.557698	0.426545	-0.172465	0.887123	0.586252	0.659862	0.361796	0.714976	0.412422	0.684122
AT5G47930	AT5G47930	AT5G47930	0.682512	0.14557	0.0722835	0.90672	0.226044	0.585817	-0.131315	0.814524	-0.343088	0.382987	0.031535	0.948061	0.693069	0.0832975	0.539886	0.289617	0.479483	0.411539	0.96879	0.00686678	0.665748	0.11577	0.243938	0.721745	0.626582	0.432403	0.0539988	0.954882	0.384026	0.571076
AT5G10980	AT5G10980	AT5G10980	0.12921	0.903227	0.130957	0.84327	0.445936	0.300961	0.0681424	0.930163	0.379277	0.388869	1.09105	0.00352041	0.140162	0.867096	-0.0129221	0.991949	0.0998683	0.925461	0.421906	0.390295	1.11007	0.00935918	0.371034	0.597131	-0.00745714	1	-0.461289	0.50455	-0.457147	0.546334
OMT1	AT5G54160	AT5G54160	-0.822611	0.205796	-0.697135	0.245421	-0.407368	0.444422	0.117289	0.882536	2.14524	6.03e-07	0.129123	0.823448	-0.273374	0.740099	-0.387771	0.667098	-0.653218	0.396876	-0.416656	0.498522	-0.245629	0.764553	-0.792232	0.239286	0.0297964	0.997969	0.362697	0.690803	-0.290345	0.771984
AAS	AT2G20340	AT2G20340	-0.35408	0.82398	-0.858634	0.34701	-0.531284	0.503728	1.38299	0.0610304	1.71203	0.00996142	-0.224292	0.787433	2.89489	7.24e-06	0.817806	0.461588	-0.0513033	0.980531	3.06139	1.99e-06	2.8285	3.57e-05	1.59654	0.0639997	-0.820894	0.655239	-0.430121	0.755364	-0.629048	0.648647
HTA9	AT1G52740	AT1G52740	0.824448	4.76e-05	0.874337	8.97e-06	0.526359	0.00627604	0.507038	0.0142456	-0.400254	0.0425122	-0.485891	0.010878	0.537615	0.00948623	0.6312	0.00353846	0.454279	0.0827473	0.253751	0.28609	0.221571	0.419513	0.257366	0.410499	0.0321263	0.980392	0.427036	0.158687	0.0777461	0.865765
GHS1	AT3G27160	AT3G27160	0.51047	0.475059	-0.338893	0.592164	-1.56185	0.000182391	-0.920438	0.0475426	0.407104	0.40165	-2.31221	8e-09	0.712172	0.169779	-0.172531	0.875754	-0.190618	0.857745	0.441467	0.418387	-0.232394	0.757967	-0.357681	0.660114	0.66644	0.530151	0.338501	0.686493	0.207614	0.832598
ENODL17	AT5G15350	AT5G15350	1.04153	0.20949	0.0834213	0.93827	-0.636215	0.336162	-2.28577	9.49e-05	-0.916553	0.141531	-3.17793	1e-08	0.946764	0.191992	1.26465	0.093657	1.0156	0.257535	0.19641	0.847496	0.400851	0.679318	-0.0401215	0.983918	0.671387	0.67749	0.809364	0.425995	0.551322	0.644138
LTI78	AT5G52310	AT5G52310	-1.03048	0.553947	-0.0371486	0.986045	0.173839	0.895798	2.76771	0.00612731	3.87968	2.24e-05	4.30192	1.96e-06	2.44576	0.0197828	0.0662052	0.983282	-0.180805	0.950365	3.88441	4.22e-05	2.22	0.0492581	3.20461	0.00408534	-1.77646	0.432173	-0.0700209	0.97859	0.353421	0.882292
AT4G23470	AT4G23470	AT4G23470	0.200686	0.799548	0.0476982	0.940377	0.267979	0.509742	-1.38654	6.78e-05	-2.68855	1.16e-17	-0.85383	0.0122331	0.808734	0.0356491	-0.123547	0.893112	0.0744034	0.940995	-0.0555781	0.943702	-0.0819903	0.909877	0.0500876	0.961296	-0.856017	0.183068	-0.775935	0.149398	-0.864299	0.122122
RPS5B	AT2G37270	AT2G37270	0.174486	0.879879	-0.753241	0.176744	-0.772205	0.0995635	-0.748514	0.140465	-1.10766	0.0120646	-0.463619	0.33654	0.0304168	0.994062	-0.0669278	0.961769	0.147506	0.898978	0.604572	0.256543	0.166957	0.847495	-0.0440485	0.975246	0.598767	0.609103	-0.232539	0.804256	0.30477	0.747449
EMB3126	AT3G63490	AT3G63490	-0.149132	0.873595	-0.77239	0.0759336	-1.80477	2.12e-07	-0.709289	0.0803224	-0.610503	0.109919	-1.808	1.05e-07	-0.0162341	1	-0.218261	0.790744	-0.707343	0.185057	-0.323346	0.507953	-0.667244	0.140531	-0.369307	0.568164	0.483189	0.614595	0.468669	0.462683	0.34085	0.645565
AT1G13480	AT1G13480	AT1G13480	2.03368	0.713143	1.87762	0.521911	2.18233	0.342047	0.158982	0.991293	-3.21169	0.186064	0.89908	0.714864	-0.517414	0.947324	1.145	0.809568	0.289596	0.961598	1.46025	0.721095	7.643	0.000331359	1.9212	0.605651	-0.634427	0.970335	-1.62882	0.702695	-0.995661	0.840324
AT3G08520	AT3G08520	AT3G08520	1.34108	0.0103856	0.800803	0.151763	0.748758	0.114348	0.468717	0.411494	0.133242	0.82782	0.724412	0.116216	1.17625	0.0147895	1.09422	0.0473411	0.929565	0.146473	1.42229	0.00178769	1.07138	0.0385985	0.584988	0.422408	0.775387	0.472787	0.449639	0.588581	0.532032	0.542538
AT4G08555	AT4G08555	AT4G08555	0.963254	0.700797	0.0159119	0.995613	0.517595	0.734979	-0.61533	0.744747	-2.38006	0.0591495	0.383793	0.800274	-1.01981	0.604367	-0.840849	0.747791	1.09806	0.652916	-1.43872	0.355027	2.72927	0.0567346	1.10131	0.628738	-1.95061	0.536743	-1.78598	0.394004	0.0647235	0.988106
KCS10	AT2G26250	AT2G26250	-0.089302	0.954316	-0.941596	0.0965113	-2.7643	5.28e-10	-1.01557	0.0467164	-0.0959732	0.88573	-1.5338	0.000627478	-1.25582	0.011759	-0.2471	0.822995	-0.555423	0.508155	-1.27241	0.00887522	-0.897968	0.116918	-1.11568	0.0640398	0.0619975	0.984395	0.102367	0.931283	0.00552096	0.997954
DGR2	AT5G25460	AT5G25460	-0.367241	0.879822	-0.755845	0.583834	-6.95351	4.84e-13	-2.70402	0.0054455	-0.245333	0.849726	-6.42974	8.07e-13	-0.701957	0.647909	-0.664228	0.734756	-1.21646	0.448286	-1.43658	0.186294	-1.48003	0.224992	-1.65333	0.21985	-0.494517	0.891262	0.146556	0.954659	0.192252	0.939241
AT4G24350	AT4G24350	AT4G24350	-0.697437	0.515877	-1.24966	0.110787	-2.58694	6.37e-05	-0.73942	0.330329	0.701822	0.308699	-2.75223	9.87e-06	3.08632	9.9e-08	1.63777	0.0268752	0.228745	0.88574	3.07135	1.5e-07	2.95142	1.88e-06	1.85209	0.0110581	0.103877	0.980064	1.25836	0.198627	0.878329	0.44732
ATNTT2	AT1G15500	AT1G15500	0.295914	0.753056	-0.600885	0.295755	-1.23075	0.00462991	-0.044395	0.970803	-0.922893	0.036382	-0.414258	0.386238	-0.0965541	0.936181	0.216784	0.835412	0.0157541	0.991978	-0.0243851	1	-0.196195	0.809066	-0.070684	0.955302	0.379709	0.7818	0.628117	0.396855	0.654064	0.42061
GPX1	AT2G25080	AT2G25080	-0.998059	0.0846406	-1.11509	0.0314353	-1.17566	0.00891888	-0.933825	0.0571228	0.256286	0.641836	-1.43068	0.000905617	-0.639844	0.268047	-1.38195	0.00687738	-0.877027	0.182047	-0.908899	0.0629974	-1.24823	0.0122973	-1.05987	0.0672275	-0.154204	0.945441	-0.377201	0.663709	-0.391386	0.67175
AT5G64790	AT5G64790	AT5G64790	16.6763	NA	1.42009	NA	2.08896	NA	16.0763	NA	-4.28924	NA	0.105103	NA	15.9835	NA	0.176071	NA	-0.239671	NA	16.4644	NA	8.18543	NA	0.931464	NA	14.1084	NA	-4.20019	NA	-1.20073	NA
AT3G62530	AT3G62530	AT3G62530	-0.514697	0.513609	-0.798173	0.159953	-0.845623	0.0762977	-0.569665	0.303251	-0.180981	0.75988	-0.635586	0.183877	0.262295	0.748335	-0.0754025	0.958095	-0.163867	0.888485	0.39333	0.520949	-0.0102119	0.996393	-0.256792	0.794116	0.645822	0.582963	-0.0486985	0.969449	0.278498	0.780232
YCF37	AT2G23670	AT2G23670	0.342706	0.651451	-0.704012	0.148373	-1.42289	0.000196713	-0.319243	0.540618	0.548821	0.191775	-1.21528	0.0012932	0.264833	0.694216	-0.0435914	0.971812	0.015649	0.991046	0.395841	0.433674	-0.14419	0.850655	-0.136442	0.887389	0.617957	0.523967	0.183689	0.827772	0.155304	0.867606
AT4G29905	AT4G29905	AT4G29905	0.576063	0.624245	0.287061	0.77736	0.782251	0.251617	0.19346	0.849938	0.579691	0.415637	-1.5004	0.014012	-2.69099	7.31e-06	-1.2563	0.126757	-0.445219	0.737845	-0.962118	0.182586	-0.989952	0.220932	-0.962316	0.306745	-0.97212	0.531248	-0.832702	0.441831	-1.0399	0.360602
EXPA1	AT1G69530	AT1G69530	-0.516979	0.777805	0.405359	0.761428	-2.25185	0.00599053	-2.83517	0.000688181	-1.05184	0.242124	-3.69084	1.81e-06	-0.863183	0.467243	-1.19609	0.339723	-1.29656	0.321186	-0.858055	0.417089	-0.511319	0.713511	-1.54606	0.183339	0.075944	0.992381	-0.408483	0.815648	-0.377424	0.844027
AT5G60670	AT5G60670	AT5G60670	0.434481	0.744888	-0.827859	0.321027	-1.66797	0.00809423	-1.00338	0.166305	-1.44975	0.0210534	-1.0531	0.101014	0.2286	0.866189	0.401728	0.768578	0.488105	0.707845	0.854934	0.254763	0.409773	0.694879	0.208564	0.893088	0.752365	0.657698	-0.112991	0.946634	0.445856	0.734049
PNP-A	AT2G18660	AT2G18660	0.26797	0.942807	0.97107	0.57906	1.1038	0.417032	-2.54085	0.0570282	-8.05176	2.79e-12	-1.48914	0.236654	-0.000131951	1	-0.464498	0.88003	-0.237807	0.945554	-1.73359	0.224543	-0.917238	0.629771	-0.733565	0.767911	-2.73299	0.261629	-2.75865	0.132135	-1.37423	0.553174
BBX15	AT1G25440	AT1G25440	-0.225894	0.867274	-1.17928	0.0617043	-1.13691	0.0367715	0.0475291	0.976989	0.922523	0.095911	-1.69068	0.000934068	-2.21001	1.85e-05	-1.36229	0.0342606	-0.903026	0.268766	-0.232128	0.793308	-0.616669	0.411749	-0.846905	0.289506	-0.350704	0.853173	-0.947561	0.27942	-0.778769	0.434432
Lhca6	AT1G19150	AT1G19150	-0.386142	0.775247	-1.21789	0.101463	-3.83511	3.27e-10	-0.607082	0.436515	1.25438	0.0431026	-4.05158	6.84e-12	-0.312297	0.781935	-1.11231	0.188409	-1.04519	0.2671	-0.958899	0.174685	-1.4358	0.0424813	-1.6127	0.0353819	0.221503	0.939477	0.0874344	0.958995	-0.255722	0.860109
PSY	AT5G17230	AT5G17230	0.448004	0.500101	0.236453	0.695133	0.293189	0.522807	-0.318291	0.537922	1.24132	0.000923771	-0.185597	0.689581	-0.310347	0.616655	-0.965369	0.0425886	-0.404921	0.582194	-0.596675	0.185398	-0.773031	0.101061	-0.481167	0.457164	0.201719	0.894473	-0.294645	0.703523	-0.453913	0.549463
RBP45B	AT1G11650	AT1G11650	-0.0422241	0.953453	-0.12243	0.720693	-0.0594229	0.836257	0.0586157	0.873159	-0.381847	0.089993	0.549888	0.00944225	-0.041217	0.945044	0.0597464	0.923415	0.0271796	0.966105	-0.00576632	1	-0.0694702	0.872026	0.0611865	0.91262	-0.0441876	0.974023	-0.00591013	0.991782	-0.0202376	0.976376
P5CR	AT5G14800	AT5G14800	0.117091	0.942421	-0.547965	0.446444	-1.08012	0.0417002	-0.202416	0.807629	-2.46067	3.19e-07	-0.0993321	0.882897	-0.422173	0.610219	-0.188135	0.889177	0.100465	0.947146	0.314192	0.682042	-0.118214	0.913522	-0.0798879	0.957662	0.167919	0.950342	0.0784826	0.955856	0.52226	0.611709
MO1	AT4G15760	AT4G15760	-0.0929863	0.984555	-0.00974857	0.996154	-1.41257	0.177794	0.360801	0.817376	-1.4674	0.152433	-0.252607	0.836011	1.45324	0.236329	-0.365948	0.884167	0.560708	0.802296	1.09046	0.368736	1.7475	0.14664	-0.0966647	0.974925	-0.37872	0.931582	-2.15903	0.151794	-0.70159	0.728828
AT5G59690	AT5G59690	AT5G59690	0.917026	0.397868	0.833543	0.364733	0.539617	0.496399	0.588475	0.511938	0.955405	0.190518	2.76956	1.28e-05	1.15183	0.163066	0.720844	0.547991	0.430934	0.777635	0.812499	0.33469	0.750176	0.440366	0.40317	0.778586	0.690168	0.728467	0.446301	0.746609	0.130945	0.942307
ERD7	AT2G17840	AT2G17840	1.04863	0.449451	0.463283	0.725823	0.435263	0.670835	2.07404	0.0197856	1.70403	0.0439048	0.70969	0.441601	5.74188	3.48e-14	2.94226	0.00113436	0.915287	0.548826	3.92925	8.67e-07	2.19939	0.0184431	1.87675	0.0846453	-0.838265	0.741368	1.47195	0.283275	0.701792	0.683847
FDH	AT5G14780	AT5G14780	-0.608271	0.479563	0.708303	0.288323	0.980005	0.061354	0.330438	0.646532	0.384348	0.522834	1.13823	0.0231081	-1.50067	0.0045865	-1.12879	0.0802807	-0.606072	0.505187	-2.39313	1e-06	-0.859294	0.185108	-0.813447	0.28512	-1.98127	0.0028452	-1.63665	0.0186378	-1.34703	0.0910435
AT1G13360	AT1G13360	AT1G13360	1.34279	0.0565105	1.75091	0.00411438	2.65767	4.31e-07	2.85987	1.17e-07	1.71984	0.00146632	2.60283	4.57e-07	1.85646	0.00101649	0.777683	0.365714	1.14598	0.149607	2.05481	0.000211577	1.34803	0.0351579	1.45934	0.0349797	-0.35224	0.860934	-0.520982	0.621859	-0.444244	0.700499
AT4G27654	AT4G27654	AT4G27654	5.58248	5.27e-06	2.43813	0.127709	2.60966	0.0628533	5.28661	8.1e-06	6.16707	1.99e-07	2.06502	0.141476	7.33754	4.23e-11	5.09112	0.0001701	6.00401	1.42e-05	5.38866	3.73e-06	4.24197	0.00197268	4.03129	0.00948894	0.80256	0.854441	1.89248	0.396978	3.62728	0.074378
GLX1	AT1G11840	AT1G11840	-1.0249	0.0159694	-0.814565	0.0533889	-0.179427	0.684817	0.416156	0.346632	0.759361	0.0357625	0.494504	0.186454	0.30341	0.586359	-0.228732	0.769513	-0.61871	0.259855	0.657619	0.0995294	0.0783159	0.917697	-0.479203	0.40641	0.292927	0.801771	0.394548	0.543121	0.287119	0.697107
UGT73C6	AT2G36790	AT2G36790	0.753264	0.780244	-0.86558	0.632288	-0.499531	0.744821	-0.246638	0.912875	-2.6223	0.0313801	1.52965	0.231565	-2.18373	0.135694	-1.42348	0.479625	0.142606	0.968315	-2.55953	0.0542275	1.1039	0.542898	0.147989	0.968969	-0.518945	0.920156	-3.41064	0.049195	-0.201084	0.952718
AT1G58684 AT1G59359	AT1G59359	AT1G59359	-0.102324	0.924772	-0.988376	0.0238544	-0.938448	0.0152446	-0.697236	0.105208	-1.34534	0.000228618	-0.21228	0.634567	-0.226674	0.740099	-0.0923606	0.934641	-0.212264	0.812691	0.420394	0.383044	0.0165874	0.989049	-0.291527	0.695152	0.473398	0.647018	-0.50155	0.451147	0.094744	0.923249
AT1G58983	AT1G58983	AT1G58983	-0.101634	0.925462	-0.987996	0.0238733	-0.938126	0.0152775	-0.696546	0.105576	-1.34496	0.000229207	-0.212993	0.633253	-0.226439	0.740099	-0.0919801	0.934861	-0.211941	0.813195	0.421084	0.382191	0.0168118	0.988908	-0.291205	0.695193	0.47369	0.646487	-0.502013	0.450604	0.0945206	0.923374
AT1G58684 AT1G58684	AT1G58684	AT1G58684	-0.101634	0.925462	-0.987996	0.0238733	-0.938126	0.0152775	-0.696546	0.105576	-1.34496	0.000229207	-0.212993	0.633253	-0.226439	0.740099	-0.0919801	0.934861	-0.211941	0.813195	0.421084	0.382191	0.0168118	0.988908	-0.291205	0.695193	0.47369	0.646487	-0.502013	0.450604	0.0945206	0.923374
GLU1	AT5G04140	AT5G04140	-0.555147	0.320486	-0.822373	0.0604198	-1.53113	1.9e-05	-0.732854	0.0726055	0.632959	0.0999147	-2.15725	3.88e-10	-0.487391	0.319185	-0.687312	0.174372	-0.712427	0.190446	-0.83909	0.0331025	-1.03567	0.0115445	-0.562505	0.320666	0.109752	0.959184	0.142443	0.8648	0.117815	0.899474
SHD	AT4G24190	AT4G24190	-0.539269	0.675512	-0.54668	0.560182	-1.24133	0.0626339	-0.822352	0.29276	-1.45695	0.0246069	-1.13023	0.084307	-0.400007	0.725925	-0.48985	0.707569	-0.346759	0.820242	-0.320013	0.755499	-0.0103133	0.998941	-0.129344	0.941714	-0.32967	0.898128	-1.4015	0.162907	-1.13031	0.332971
ndhJ	ATCG00420	ATCG00420	2.91368	9.15e-07	2.04699	0.00132134	1.93234	0.000899079	2.34663	6.31e-05	3.29711	1.63e-09	0.858329	0.169496	3.10678	2.16e-08	2.40375	0.000126488	2.41945	0.000193965	2.38339	3.84e-05	2.26218	0.000254299	2.0658	0.00211762	-0.212924	0.940407	-0.844539	0.418116	0.25728	0.857721
NUDT21	AT1G73540	AT1G73540	1.90876	0.116175	0.903783	0.488242	1.29559	0.193823	1.42386	0.182293	2.84161	0.00144357	0.126588	0.918392	1.70961	0.114218	-1.29679	0.363392	2.43089	0.0406058	1.38488	0.197005	0.640608	0.671439	0.634144	0.73	0.469102	0.89818	-0.686786	0.712095	1.41953	0.408277
AT4G10480	AT4G10480	AT4G10480	0.1353	0.894019	-0.857729	0.0571449	-0.866171	0.0265592	-0.937328	0.0214102	-0.868934	0.0234076	-0.0968382	0.841686	0.054655	0.961922	0.0791812	0.946292	0.018098	0.989342	0.574388	0.197192	0.175423	0.803777	-0.0831248	0.935999	0.618798	0.510002	-0.0226808	0.983293	0.185964	0.832722
CYP86A2	AT4G00360	AT4G00360	0.37266	0.793513	-1.12691	0.152173	-1.80001	0.00441322	-0.163578	0.879664	0.754113	0.278348	-2.70031	7.19e-06	-0.336162	0.772528	-0.145461	0.939217	-0.222991	0.891256	-0.267698	0.800404	-0.74798	0.400455	-0.569411	0.628969	-0.575003	0.769872	-0.563504	0.639766	-0.0119368	0.995809
ZAT11	AT2G37430	AT2G37430	-1.65791	NA	0.122184	NA	1.76026	NA	-3.96178	NA	-2.21281	NA	1.35763	NA	1.32848	NA	0.802432	NA	2.11718	NA	-1.64254	NA	6.57695	NA	1.74639	NA	-1.98678	NA	0.819071	NA	1.24997	NA
NFXL1	AT1G10170	AT1G10170	0.0911883	0.980228	-0.195932	0.883564	-0.0638778	0.953956	0.0165795	1	-2.69921	0.000242254	0.65053	0.444844	-0.331267	0.82954	0.0458471	0.985458	0.278936	0.88739	-0.211293	0.880908	0.90543	0.400156	0.362562	0.832599	-0.106846	0.984395	-1.14151	0.384168	0.215456	0.911808
EDA39	AT4G33050	AT4G33050	1.00688	0.456611	0.52903	0.671075	0.957711	0.288011	-1.2112	0.206517	-2.05806	0.0108248	0.56338	0.541035	0.444324	0.765634	0.171659	0.945514	0.662193	0.691228	-1.17248	0.22481	0.976468	0.391392	0.318364	0.867392	-1.51866	0.412365	-0.475814	0.779208	-0.277196	0.891488
AT5G55450	AT5G55450	AT5G55450	0.600949	0.830139	-0.270513	0.89736	-0.623393	0.668333	-4.77453	7.56e-05	-7.74004	4.89e-12	-2.31166	0.0528356	0.383132	0.888778	-0.693293	0.798196	-0.278891	0.933913	-1.39756	0.345876	-1.09462	0.540457	-0.786096	0.742855	-2.08902	0.461006	-2.10204	0.282852	-1.30996	0.572592
AT4G36648	AT4G36648	AT4G36648	0.533785	0.609189	0.984449	0.154327	1.4439	0.00910562	2.11504	0.000145036	0.842485	0.153477	1.83455	0.000524858	2.32614	1.66e-05	0.986435	0.202958	0.844756	0.346511	2.04585	0.000220473	2.08839	0.000319041	1.09762	0.153694	0.161571	0.961238	0.188813	0.887852	-0.270029	0.833702
AT3G47370	AT3G47370	AT3G47370	-0.0457084	0.98042	-0.867654	0.0664888	-0.418252	0.353169	-1.17555	0.00441382	-1.18945	0.0021448	-0.62482	0.129236	-0.111957	0.908798	-0.218405	0.814229	-0.0125212	0.99387	0.498498	0.30564	0.0137258	0.99216	-0.187378	0.833545	0.685479	0.472178	-0.225203	0.786787	0.215559	0.808694
CRT3	AT1G08450	AT1G08450	0.163307	0.925391	0.529962	0.549925	0.481017	0.500597	-0.833437	0.256428	-2.70071	2.6e-06	-1.13431	0.0662707	0.102863	0.952714	-0.169487	0.922984	0.150249	0.930258	-0.415953	0.635357	-0.0122383	0.997251	-0.137388	0.933002	-1.27766	0.331406	-1.80987	0.0354196	-1.14258	0.295463
AT1G18740	AT1G18740	AT1G18740	1.52048	0.0590499	0.409786	0.677663	0.574446	0.436597	0.968385	0.194414	1.11538	0.0945043	-0.653166	0.351443	2.62036	2.31e-05	1.80397	0.0159289	1.8233	0.0229329	1.44794	0.0339623	1.10301	0.173498	0.219017	0.890411	0.425893	0.852022	0.229751	0.878162	0.883866	0.459223
KAT5	AT5G48880	AT5G48880	-0.634422	0.645926	-1.12553	0.228017	-0.700352	0.397617	0.0959161	0.953251	1.76357	0.0130579	2.66438	7.69e-05	2.00977	0.00723635	0.663765	0.618913	0.0472129	0.98433	2.62706	0.000202201	2.17847	0.00514102	2.12484	0.012199	0.188159	0.964808	0.954977	0.443935	0.614536	0.678708
AT3G22600	AT3G22600	AT3G22600	1.43039	0.614427	0.720269	0.763589	1.87419	0.246915	-0.941326	0.674058	-6.19304	2.58e-05	0.411119	0.824395	-0.0984878	0.996318	-0.971752	0.761395	-0.990446	0.759656	0.140997	0.980577	1.63448	0.43943	-0.857324	0.783824	-0.493432	0.95196	-4.45604	0.0359121	-2.88551	0.265649
AT5G22580	AT5G22580	AT5G22580	0.492827	0.839065	0.121395	0.949251	-4.26443	2.54e-05	-0.836259	0.535658	0.218417	0.879009	-5.90167	1.1e-08	0.379157	0.861489	0.305647	0.91534	-0.634433	0.781894	0.284518	0.876384	0.55672	0.755318	0.542454	0.806732	-0.688471	0.847397	-0.245384	0.923426	0.964207	0.636666
AT5G43460	AT5G43460	AT5G43460	0.668498	0.00244545	0.805786	6.57e-05	0.571194	0.00288131	0.463536	0.0291503	-0.740868	6.5e-05	-0.665296	0.000360893	0.179403	0.552954	0.263653	0.385232	0.382197	0.178167	-0.0314843	0.944113	0.0742583	0.844906	0.267096	0.390086	-0.126196	0.859831	0.332327	0.305546	0.196902	0.612954
AT1G69252	AT1G69252	AT1G69252	0.93905	0.138805	0.725708	0.22917	1.4017	0.00239989	1.82822	9.33e-05	0.685634	0.172128	0.907925	0.054984	-0.330969	0.680383	-0.168636	0.892165	-0.056298	0.967593	-1.09778	0.0295336	-0.628889	0.327281	-0.0506594	0.973036	-0.736293	0.535424	0.37187	0.688443	0.152437	0.898202
LTPG2	AT3G43720	AT3G43720	0.529453	0.685069	-0.279299	0.793986	-2.61271	3.77e-05	-1.23644	0.087845	0.435882	0.577984	-2.75826	7.98e-06	0.47224	0.662665	0.898837	0.369798	0.414833	0.775721	0.295741	0.781099	0.365736	0.747055	0.271523	0.855512	0.3957	0.866048	0.621908	0.607916	0.429474	0.757472
AT2G05220	AT2G05220	AT2G05220	0.271938	0.706038	0.176512	0.756596	-0.577336	0.12472	-0.379471	0.393694	-0.154845	0.732382	-0.735531	0.037533	0.559937	0.20229	0.506136	0.346471	0.346652	0.611243	0.647417	0.100508	0.428115	0.385019	0.342635	0.591231	0.542637	0.540429	0.0369069	0.970044	0.345048	0.626267
OHP	AT5G02120	AT5G02120	0.425169	0.56977	-0.0303011	0.970711	-0.258611	0.604279	-0.627451	0.196835	0.389598	0.41329	-1.40971	0.000410685	0.00842999	1	-0.473731	0.503405	-0.337513	0.69278	-0.614514	0.208637	-0.798239	0.117302	-0.450875	0.533063	0.275679	0.852111	0.396376	0.610173	0.176965	0.858398
AT3G45030	AT3G45030	AT3G45030	0.391379	0.712007	-0.209268	0.805745	-1.12214	0.0330985	-0.393217	0.574158	-0.606614	0.28572	-1.31446	0.0091472	0.179656	0.873822	0.338765	0.761083	0.256673	0.837993	0.551586	0.39965	0.313654	0.720835	0.0878733	0.952193	0.653694	0.636865	0.0540855	0.970044	0.556065	0.582714
SKP1	AT1G75950	AT1G75950	0.446801	0.0203453	0.701981	1.82e-05	1.0169	8.03e-12	0.571614	0.000398056	0.578904	0.000148405	0.27933	0.0876307	0.658855	2.35e-05	0.226381	0.357614	0.268999	0.278222	0.706818	4.87e-06	0.492084	0.0046548	0.448022	0.0216062	-0.121326	0.82567	-0.473568	0.0376748	-0.331545	0.238211
AT3G52960	AT3G52960	AT3G52960	0.169098	0.899719	-1.23823	0.031014	-2.02974	2.58e-05	-0.423671	0.518457	0.477886	0.396933	-0.884283	0.0800115	0.592889	0.383851	-0.167781	0.899191	-0.607012	0.49012	0.511485	0.421445	-0.198363	0.836747	-0.563595	0.507153	0.611202	0.648275	0.359942	0.71779	0.158564	0.899023
ARFA1D	AT1G70490	AT1G70490	-0.239136	0.696106	-0.231585	0.606281	0.110646	0.77309	-0.232097	0.57121	-0.0350166	0.938902	-0.475188	0.126594	0.263171	0.572498	-0.249204	0.674171	-0.122338	0.872767	0.282584	0.480212	-0.179615	0.729493	0.0203217	0.984122	0.0801391	0.964808	-0.380696	0.472545	-0.269527	0.665122
TCH4	AT5G57560	AT5G57560	0.254565	0.922541	-0.669067	0.62772	-0.517938	0.644521	-1.92099	0.0570939	-1.51209	0.118514	1.27766	0.184413	0.521737	0.753233	0.267139	0.919801	2.03067	0.10989	-0.511784	0.715486	-0.075548	0.973566	-0.296202	0.897392	-0.667469	0.832656	-0.32161	0.883087	1.03447	0.565138
OASA1	AT4G14880	AT4G14880	0.0309997	0.973337	-0.0107063	0.981804	0.321905	0.188138	-0.0351091	0.943111	-0.193846	0.462253	-0.159478	0.535177	0.690662	0.00316497	-0.105949	0.850389	-0.0967654	0.863197	0.383404	0.137844	-0.0479058	0.920507	-0.00584513	0.993026	-0.08088	0.94132	-0.328204	0.397091	-0.466309	0.238158
RACK1B_AT	AT1G48630	AT1G48630	-0.0053554	1	-1.12618	0.0906705	-1.70298	0.00189024	-1.80505	0.00139834	-2.24395	1.69e-05	-1.23715	0.0243488	-0.0832278	0.958802	0.0571886	0.973247	-0.0454872	0.978626	0.782091	0.231538	0.258282	0.798523	0.00394481	0.998647	0.841246	0.543597	-0.120452	0.931283	0.324044	0.789124
cpHsc70-2	AT5G49910	AT5G49910	0.22319	0.784008	-0.444338	0.373038	-0.710739	0.0641338	-0.485053	0.268775	0.279558	0.518745	-0.621884	0.0988065	0.245024	0.697115	0.0875144	0.935567	-0.0665948	0.950943	0.295579	0.555095	-0.0228757	0.982384	-0.137307	0.876988	0.549573	0.548377	0.154228	0.849597	0.0953584	0.919098
SQP1	AT5G24150	AT5G24150	0.393106	0.758356	-0.613577	0.458689	0.937767	0.13398	-0.149666	0.882796	1.04791	0.0874061	0.742906	0.232525	-1.37279	0.0355293	-1.07692	0.186181	-0.447682	0.718119	-1.16933	0.0708161	-0.798502	0.319242	-0.0494972	0.979305	-0.308091	0.893635	-0.608383	0.575688	-0.82677	0.452781
VHA-A	AT1G78900	AT1G78900	-0.570599	0.0106395	-0.5263	0.0148971	-0.248499	0.237955	-0.180057	0.466455	-0.135542	0.552278	0.337924	0.0810439	-0.178474	0.53468	-0.242074	0.429994	-0.326575	0.265973	-0.258317	0.259836	-0.327528	0.175315	-0.380009	0.151904	-0.0916888	0.904845	0.065293	0.886171	-0.222045	0.550041
VAR1	AT5G42270	AT5G42270	0.159834	0.804451	-0.404761	0.276941	-0.370264	0.238963	-0.231476	0.53875	0.999824	0.000211064	-0.0784115	0.827	-0.247005	0.570599	-0.746066	0.0281851	-0.470633	0.28988	-0.639049	0.0343779	-0.839637	0.00694481	-0.507362	0.21763	0.200683	0.835953	-0.0875363	0.900781	-0.249137	0.67175
THIC	AT2G29630	AT2G29630	0.630792	0.462154	-0.599637	0.395446	-1.03802	0.0511829	0.853816	0.148595	0.039743	0.961851	-1.55718	0.00175965	-1.2696	0.0246321	-0.400878	0.698586	-0.69233	0.429882	-1.17653	0.0332782	-0.516708	0.496854	-0.194438	0.875579	-0.536417	0.720832	0.134132	0.917534	-0.234569	0.84566
IIL1	AT4G13430	AT4G13430	-0.774405	0.0669002	-0.622674	0.124221	-0.589892	0.0901323	-0.22297	0.630823	-0.433156	0.226785	0.0117508	0.982757	0.158894	0.800067	-0.0366764	0.971812	-0.156841	0.847015	0.00828074	1	-0.0372033	0.961745	-0.202841	0.76941	-0.0108772	1	0.478388	0.395203	0.250813	0.71362
ZKT	AT1G55480	AT1G55480	-0.123849	0.902735	-0.624105	0.182924	-0.885168	0.0196053	-0.188925	0.736678	1.12826	0.00169565	-1.3924	8.95e-05	0.0540287	0.960733	-0.580274	0.288925	-0.426286	0.529876	-0.263273	0.614249	-0.623224	0.189292	-0.577558	0.307476	0.218785	0.872904	-0.0648226	0.948717	0.0193983	0.988106
AT4G29410	AT4G29410	AT4G29410	-0.0743657	0.968246	-0.393455	0.594011	-1.16029	0.0222916	-0.925478	0.0989783	-1.54123	0.00143817	-0.865984	0.0888142	-0.179369	0.868506	-0.142597	0.920495	-0.169786	0.895937	0.512939	0.424129	-0.0019434	1	-0.233817	0.833829	0.555731	0.689442	-0.275986	0.791624	0.372414	0.718647
AT2G43550	AT2G43550	AT2G43550	-0.668812	0.58735	-1.93112	0.0154794	-2.76846	0.000129886	-0.00537025	1	0.629099	0.411381	-2.35127	0.000550152	3.20077	3.62e-07	1.03729	0.292246	0.0454306	0.983996	4.32299	1.65e-12	2.61167	0.000145936	2.35893	0.0015456	1.18404	0.448471	1.56053	0.125659	1.06795	0.382887
AT2G23270	AT2G23270	AT2G23270	0.97846	0.850594	0.731723	0.819046	3.31989	0.0954664	0.15988	0.983726	-4.23163	0.0529925	2.69328	0.174793	1.34766	0.709792	0.256783	0.965525	0.708826	0.88556	-0.306831	0.952741	6.52055	0.00120983	-0.122234	0.985	-17.5288	3.41e-14	-1.80611	0.626255	-0.31075	0.954164
CAO	AT2G47450	AT2G47450	-0.184407	0.848782	0.0508952	0.944795	-1.56926	4.17e-05	-0.902051	0.034669	-0.0382352	0.94967	-1.69903	5.26e-06	-0.0860113	0.937109	0.406113	0.564854	-0.0796904	0.945297	-0.136017	0.841953	0.0349596	0.971274	-0.226067	0.789147	-0.0393368	0.991116	0.327005	0.669295	-0.362235	0.654982
AT3G46080	AT3G46080	AT3G46080	2.16615	0.271549	2.29366	0.159515	1.45152	0.314081	0.671123	0.745312	-2.12517	0.141112	-1.87045	0.168837	2.31766	0.151797	0.143628	0.971896	0.252636	0.947146	0.754674	0.713814	6.04266	4.18e-06	1.2544	0.5915	-2.59473	0.505776	-1.76093	0.463074	-2.68967	0.238999
AT1G67860	AT1G67860	AT1G67860	0.0596774	0.985788	1.11667	0.222213	2.88989	2.19e-05	0.880445	0.312635	2.08862	0.00273134	0.723915	0.35131	0.279139	0.851705	-0.0394206	0.986218	0.330209	0.852071	-0.18994	0.884926	0.913659	0.354023	0.841469	0.483539	-0.242361	0.946637	-0.580871	0.677921	-1.43302	0.254561
AT4G21570	AT4G21570	AT4G21570	-0.136891	0.923973	-0.318707	0.683217	0.638729	0.249391	0.861277	0.134114	1.06761	0.0364439	0.16304	0.793903	3.13254	1.3e-11	0.829279	0.252641	-0.0567168	0.969745	2.32462	1.52e-06	0.910516	0.148435	0.254771	0.82006	-0.456046	0.772258	0.330073	0.748642	-0.426679	0.683847
ABA1	AT5G67030	AT5G67030	0.114491	0.91938	0.0616864	0.932945	0.527271	0.231194	0.763308	0.0878971	1.57225	3.4e-05	0.270453	0.555524	-0.253865	0.71953	-0.459526	0.501464	-0.549285	0.420937	-0.770626	0.0827196	-0.763904	0.122008	-0.439937	0.528928	-0.176745	0.915912	-0.185809	0.832039	-0.304548	0.715154
AT1G26880	AT1G26880	AT1G26880	-0.297791	0.701246	-0.819163	0.0712131	-0.799824	0.0422811	-1.20643	0.00205314	-1.05576	0.00476811	-0.716084	0.0642754	-0.158224	0.837313	-0.0944	0.933154	-0.217978	0.807005	0.273652	0.610107	0.0487972	0.955707	-0.276524	0.712575	0.612622	0.512832	-0.135777	0.879026	0.0251237	0.985394
AT5G55620	AT5G55620	AT5G55620	0.500123	0.679811	-1.01762	0.181919	-2.84888	9.75e-07	-1.45548	0.0251045	-0.959924	0.13362	-5.57651	2.36e-21	-2.13401	0.000428951	-1.41232	0.0629521	-0.751989	0.479954	-1.396	0.0310497	-1.36811	0.053891	-1.20231	0.15238	0.15646	0.965335	0.104731	0.949256	0.528302	0.67175
NdhM	AT4G37925	AT4G37925	-0.00290167	1	-0.679289	0.310167	-2.03795	2.98e-05	-0.0185657	1	1.27189	0.0107306	-2.57867	4.89e-08	-1.25677	0.0216224	-1.64237	0.00380948	-1.10805	0.113218	-2.02434	4.1e-05	-1.93632	0.000238591	-1.43731	0.0188716	-0.0191456	1	-0.0703737	0.959616	-0.437356	0.674501
AT2G40510	AT2G40510	AT2G40510	0.0968881	0.910821	-0.073088	0.894067	-0.0157356	0.973134	-0.0837271	0.874436	-0.71802	0.0215414	0.0630685	0.877229	0.549132	0.142159	0.242253	0.697886	0.317279	0.591958	0.748611	0.0233424	0.284868	0.543133	0.26811	0.65018	0.566334	0.428691	-0.184477	0.774937	0.145477	0.841279
AT2G25210	AT2G25210	AT2G25210	0.74631	0.272184	-0.0494419	0.954721	-0.307438	0.579983	-0.52109	0.366656	-0.569806	0.26215	-0.0232384	0.972968	0.638928	0.291662	0.666549	0.343315	0.546126	0.510476	0.985041	0.0490004	0.78535	0.182555	0.282219	0.771681	0.804801	0.467096	0.438808	0.611793	0.577758	0.515605
GASA6	AT1G74670	AT1G74670	0.577115	0.843306	2.00627	0.187422	-2.79803	0.0230534	-3.56595	0.00437323	0.159812	0.928919	-6.60508	8.34e-08	0.00829194	1	-0.846057	0.743386	-0.631781	0.826668	-3.2899	0.008735	-2.03033	0.193861	-3.57603	0.0138257	-0.0846174	0.997056	0.0892769	0.97859	-1.72392	0.444766
FAD3	AT2G29980	AT2G29980	0.8599	0.535135	-0.36241	0.779133	-3.25631	2.17e-05	-2.44305	0.00274788	-1.95698	0.0127651	-4.02516	6.96e-08	-0.36063	0.815067	0.0998157	0.967376	-0.272458	0.894169	0.30725	0.81852	0.22419	0.890127	0.188039	0.927695	-0.11148	0.984269	0.680608	0.653342	0.12305	0.955015
AT1G67360	AT1G67360	AT1G67360	1.13708	0.187829	0.651496	0.449991	1.82591	0.00258647	2.27055	0.000252528	0.880714	0.183418	1.25816	0.0412397	-0.511683	0.601609	-0.791424	0.424353	-0.307705	0.838322	0.0980962	0.944458	-0.109354	0.934809	0.174648	0.912525	-1.2634	0.343588	-1.01643	0.327133	-0.768671	0.516423
BCA4	AT1G70410	AT1G70410	0.461881	0.484661	-0.319612	0.579224	-1.89064	5.53e-07	-0.290545	0.585891	0.854987	0.0299251	-2.02705	3.4e-08	0.216632	0.759895	0.316685	0.681098	0.160354	0.870859	-0.742755	0.0858552	-0.479055	0.379263	-0.621717	0.29283	-0.0714207	0.976914	0.0746773	0.94272	-0.124588	0.89973
VHA-C3	AT4G38920	AT4G38920	-0.230289	0.567632	-0.425873	0.120833	-0.00153691	0.997991	-0.111581	0.743541	0.067443	0.823904	0.446485	0.0461226	-0.447503	0.0835806	-0.336156	0.31582	-0.191305	0.672077	-0.617555	0.00775259	-0.319205	0.285993	-0.561442	0.0475978	-0.265365	0.661978	-0.0475034	0.933743	-0.431626	0.274669
SIRANBP	AT1G07140	AT1G07140	-0.00425639	1	-0.114237	0.726319	0.00937386	0.975988	-0.352793	0.137436	-1.21084	1.83e-10	-0.0545434	0.834846	0.330368	0.200544	0.338279	0.251113	0.369049	0.2367	0.57475	0.00726731	0.346677	0.185178	0.397469	0.169405	0.032033	0.98248	-0.0208781	0.970764	-0.145597	0.739683
RPL9	AT3G44890	AT3G44890	0.30678	0.782136	-0.950439	0.119567	-1.73907	0.000359907	-1.07404	0.0484851	-0.340898	0.569446	-1.88054	7.24e-05	0.346323	0.6824	-0.329771	0.759444	-0.566397	0.53399	0.0441116	0.982888	-0.562146	0.427813	-0.343807	0.727874	0.704113	0.586396	0.343605	0.730844	0.30911	0.77563
AT3G23600	AT3G23600	AT3G23600	-0.424821	0.428333	0.263735	0.585527	0.73338	0.0273893	0.49391	0.198189	0.324378	0.382733	0.958818	0.00235786	-0.408905	0.359296	0.0388786	0.969315	-0.0295368	0.976464	-0.709922	0.0451474	0.227805	0.671439	-0.161415	0.824171	-0.742962	0.252566	-0.215854	0.746342	-0.458435	0.454003
AT5G07020	AT5G07020	AT5G07020	-0.648388	0.0867512	-1.39081	3.47e-06	-1.76648	3.8e-10	-0.75334	0.0149025	0.473485	0.124196	-1.62115	3.68e-09	-0.318424	0.444564	-1.04399	0.00110306	-1.0249	0.00288465	-0.556937	0.0852972	-0.902976	0.00466371	-1.15831	0.000338028	0.507705	0.466252	0.216162	0.713942	0.126331	0.855821
AT4G15610	AT4G15610	AT4G15610	1.52634	0.460052	5.66857	1.02e-06	2.48727	0.0324594	2.09751	0.131926	-0.73136	0.61578	0.250446	0.8648	2.0114	0.183619	0.157044	0.965666	-0.19435	0.954594	2.65416	0.0427215	4.74157	6.58e-05	1.70649	0.332983	-0.267018	0.973967	-0.655457	0.796106	-2.08749	0.312319
GAMMA-VPE	AT4G32940	AT4G32940	-0.0893466	0.976084	1.9287	0.0127839	2.0498	0.00247246	1.41293	0.0636878	1.10526	0.12912	0.916618	0.205867	-1.09763	0.203936	-0.581506	0.665779	-0.398263	0.804097	-1.45203	0.0539563	-0.0637095	0.970691	0.702757	0.565431	-0.834443	0.657698	-0.211119	0.901428	-0.383783	0.802215
AT5G43150	AT5G43150	AT5G43150	0.204094	0.886902	0.143447	0.879749	1.057	0.0617514	1.80792	0.00109879	2.17793	2.26e-05	1.37277	0.0101495	-0.97872	0.133658	-1.36532	0.0405417	-1.24138	0.104532	-0.666366	0.32217	-0.798362	0.271313	-0.40507	0.70644	-0.590413	0.701497	-0.30686	0.788265	-0.311017	0.798548
PHT3;1	AT5G14040	AT5G14040	-0.493915	0.108786	-0.959272	8.84e-05	-0.776732	0.000710106	-0.974917	2.37e-05	-0.836899	0.000174863	-0.208988	0.417824	-0.270308	0.40609	-0.301236	0.417424	-0.480608	0.150919	0.00595715	1	-0.0941327	0.834602	-0.454341	0.164155	0.269803	0.671193	-0.0705182	0.902718	-0.0523306	0.93324
RPL23AB	AT3G55280	AT3G55280	-0.00985562	1	-0.585197	0.24535	-0.751891	0.0637449	-0.674546	0.127631	-1.09927	0.00393344	-0.30982	0.477675	0.024982	0.996318	0.140723	0.890613	0.00465047	0.997594	0.667575	0.130088	0.288502	0.644361	0.0330869	0.979305	0.657459	0.486203	0.0398367	0.970177	0.216073	0.802482
CAX3	AT3G51860	AT3G51860	-0.161455	0.965397	0.745228	0.618911	1.7278	0.0998844	1.6296	0.16285	-4.63392	1.14e-06	0.961716	0.37987	-2.64288	0.0227742	-1.44947	0.342619	-0.266233	0.922856	-2.93283	0.00760179	0.158099	0.943172	-0.723025	0.713068	-3.26611	0.0505298	-2.79458	0.0533639	-2.45652	0.129345
HR4	AT3G50480	AT3G50480	-0.134429	0.965689	0.343158	0.809584	0.270142	0.807053	-2.92359	0.000912245	-4.70142	4.8e-09	-1.84226	0.0307807	0.0499652	0.998246	-0.450928	0.824162	-0.65944	0.713476	-1.33618	0.181907	0.515336	0.726659	-0.954003	0.51699	-2.57057	0.0554628	-1.87339	0.162737	-1.35898	0.38951
AT5G58330	AT5G58330	AT5G58330	-0.830347	0.00599634	-0.97493	0.000543176	-1.07857	2.49e-05	-0.224208	0.521788	0.197515	0.527975	-0.381187	0.167485	-0.630371	0.0303062	-0.593188	0.076437	-0.767291	0.0210818	-1.18314	3.49e-06	-0.894314	0.00155638	-0.867806	0.00465043	0.00565764	1	0.394747	0.382314	-0.0580618	0.934776
BIP2	AT5G42020	AT5G42020	-0.646702	0.684702	-0.82533	0.455481	-0.723278	0.423853	-1.51657	0.0856886	-2.44576	0.00142042	-1.05579	0.20232	-0.512175	0.710684	-0.545833	0.745928	-0.0694325	0.977049	0.0350053	1	0.0124061	0.999023	0.198801	0.924251	-0.22883	0.961138	-1.84056	0.127086	-0.899541	0.558212
J3	AT3G44110	AT3G44110	0.311213	0.283983	-0.307461	0.223712	-0.277242	0.198236	-0.600464	0.00309744	-0.526986	0.00647792	-0.137187	0.541035	-1.02768	3.22e-08	-0.649318	0.00311167	-0.611917	0.0113319	-0.672087	0.000646841	-0.583431	0.00670881	-0.403444	0.136931	-0.443396	0.256083	-0.37486	0.237483	-0.314048	0.388706
GSTU9	AT5G62480	AT5G62480	0.401359	0.942301	0.673693	0.808786	2.81114	0.114144	0.891029	0.737876	-3.68785	0.030295	3.08102	0.0710134	-1.23761	0.702414	-1.30431	0.699336	0.478862	0.916883	-4.19698	0.091166	1.90509	0.424713	0.188001	0.97244	-3.10888	0.572017	-2.76782	0.327133	0.502894	0.906205
PYL4	AT2G38310	AT2G38310	1.55121	0.0729648	0.279251	0.804184	-0.0437386	0.964845	-1.41574	0.0591473	-1.07628	0.134598	-2.35401	0.000359359	3.81599	1.13e-09	2.20268	0.00357246	1.92799	0.0226351	0.984634	0.217504	1.08922	0.213314	1.04097	0.309226	1.8978	0.087036	1.54855	0.13801	1.65299	0.129057
AT2G35260	AT2G35260	AT2G35260	-0.927054	0.0135944	-1.54431	1.7e-06	-2.82584	1.78e-20	-0.841494	0.0124617	-0.354148	0.318805	-2.34729	1.82e-15	-1.30087	2.85e-05	-1.02415	0.0043933	-1.22921	0.000603707	-0.936593	0.0042264	-1.29881	7.27e-05	-1.45289	1.75e-05	0.132081	0.925759	0.305351	0.608077	-0.206996	0.763149
AT3G12345	AT3G12345	AT3G12345	-0.0487281	0.970025	-0.336683	0.482802	-0.999614	0.00299149	-0.707544	0.0557982	0.762811	0.024639	-1.63578	2.67e-07	-0.074118	0.936397	-0.557517	0.252502	-0.585021	0.260057	-0.683533	0.0637969	-0.876568	0.0221747	-0.932086	0.0251196	0.151956	0.914045	0.143991	0.847836	-0.243126	0.731888
ADF3	AT5G59880	AT5G59880	-0.0316602	0.972436	0.00187037	0.996978	0.386416	0.109549	-0.0344201	0.945248	0.0784898	0.796785	-0.488365	0.0326417	0.0468951	0.942111	-0.0471939	0.946534	0.0284165	0.966491	-0.116036	0.748735	-0.0229718	0.966872	-0.12099	0.810288	-0.146796	0.859486	-0.237073	0.575117	-0.317173	0.458918
TL29	AT4G09010	AT4G09010	-0.288509	0.819374	-0.973864	0.145982	-2.98144	1.89e-08	-1.16466	0.0476808	0.453929	0.468926	-2.85798	2.68e-08	0.0280124	1	-0.808761	0.317357	-0.804854	0.361902	-0.262702	0.760789	-0.709399	0.337225	-0.760263	0.374388	0.649382	0.656891	0.436739	0.677826	0.408347	0.713904
C4H	AT2G30490	AT2G30490	0.265359	0.795942	-0.134874	0.863103	0.127312	0.829707	-0.229589	0.739165	0.915117	0.0473683	0.285482	0.583287	-1.06013	0.0346236	-0.718328	0.279265	-0.983077	0.120919	-1.14523	0.0162673	-0.866189	0.11928	-0.616006	0.397469	0.138682	0.956305	0.522598	0.520932	0.0725516	0.954164
AT1G19000	AT1G19000	AT1G19000	-0.515017	0.196989	0.181814	0.679379	-0.516531	0.0844348	-0.152868	0.719544	0.893463	0.00118879	-0.899199	0.00105582	-1.42481	1.25e-07	-0.712361	0.0411075	-0.858501	0.0150618	-1.18381	1.95e-05	-0.993777	0.00109549	-1.04032	0.00114127	-0.340353	0.657858	-0.161355	0.787997	-0.720985	0.115599
AT1G44000	AT1G44000	AT1G44000	-0.00456632	1	-0.266375	0.692118	-1.03147	0.0193204	-1.40807	0.00149558	-0.413238	0.404781	-2.23002	4.28e-08	-0.677346	0.211814	-0.520152	0.471825	-0.703532	0.30222	-0.786031	0.105537	-0.813571	0.128833	-0.982539	0.0862393	0.0208692	1	-0.179307	0.854002	-0.499026	0.555204
SOBIR1	AT2G31880	AT2G31880	0.807181	0.568239	0.263385	0.843964	0.348375	0.720143	-1.07285	0.254471	-3.06298	4.04e-05	-1.29791	0.106442	0.368165	0.808167	0.0743399	0.975985	0.221686	0.916842	-1.23705	0.175134	-0.103373	0.954593	-0.0800892	0.974372	-1.54637	0.36771	-1.83846	0.125719	-0.711496	0.658911
TCH2	AT5G37770	AT5G37770	1.0736	0.137849	0.233648	0.792649	-0.0624463	0.934506	0.194697	0.823625	1.56366	0.00295709	-0.85832	0.1271	0.876982	0.186021	1.16424	0.0922052	1.62604	0.0143551	0.273113	0.748169	-0.662513	0.379263	0.646284	0.476412	-0.00869801	1	0.25752	0.824629	0.953264	0.330658
AT1G13650	AT1G13650	AT1G13650	-0.500655	0.758353	-1.5247	0.094717	-4.69777	2.9e-09	-0.277692	0.818545	1.13587	0.153246	-3.03409	2.85e-05	-1.38679	0.117119	-1.20132	0.272233	-0.841509	0.542365	0.180902	0.897409	-1.16972	0.233621	-1.02082	0.398383	1.18392	0.524278	0.584555	0.693375	0.222773	0.905861
AT4G34450	AT4G34450	AT4G34450	-0.315559	0.396912	-0.244379	0.447593	-0.523473	0.0258699	-0.362581	0.178542	-1.12802	1.41e-07	-0.734302	0.000902996	-0.194913	0.591644	0.00658494	0.993394	-0.370145	0.306287	-0.274672	0.340231	-0.281359	0.378706	-0.0886954	0.871104	-0.0532271	0.969994	0.335514	0.391522	-0.0764761	0.894584
ABCB4	AT2G47000	AT2G47000	1.01242	0.729365	-0.774937	0.700091	0.783593	0.61608	1.3029	0.462428	-4.79353	0.000123288	1.6862	0.216476	1.48139	0.450801	0.0850881	0.983622	0.743767	0.806203	1.17395	0.526663	1.60379	0.372051	0.908524	0.72274	-0.231231	0.980901	-2.28403	0.285	0.204726	0.954807
AKN2	AT4G39940	AT4G39940	-0.54742	0.7258	-0.477884	0.676667	-0.651219	0.451585	0.155933	0.909092	0.805852	0.332569	0.0602015	0.95346	1.83076	0.0237658	1.25553	0.235734	-0.0205016	0.994828	2.01292	0.0092182	1.71663	0.0466512	1.72976	0.0723254	-0.465003	0.86162	1.20696	0.333645	0.52848	0.73544
AT1G49750	AT1G49750	AT1G49750	-0.571157	0.657754	-1.06162	0.204677	-1.51236	0.0238509	-2.411	0.000261546	-1.28236	0.0576111	-2.8074	6.23e-06	-1.03007	0.210515	-0.885793	0.389596	-0.437104	0.763674	-1.26547	0.0818507	-1.13033	0.175919	-0.703424	0.540744	-0.811515	0.649265	-0.87074	0.44843	-0.561094	0.68024
AT5G19250	AT5G19250	AT5G19250	-0.280514	0.827381	-0.443812	0.582017	-0.458976	0.469921	-1.68679	0.0027607	-1.3109	0.0164049	-2.51462	9.14e-07	0.890887	0.186021	0.0483971	0.977155	0.21525	0.876327	0.131812	0.897931	-0.0234558	0.989169	-0.193458	0.884837	-0.391809	0.834581	-0.790664	0.396855	-0.704238	0.49862
AT2G40590	AT2G40590	AT2G40590	0.0142487	0.998405	-0.617424	0.25037	-0.647508	0.145082	-0.651731	0.176025	-1.14727	0.00475456	-0.52111	0.235412	0.163136	0.850038	0.133415	0.907517	0.0582929	0.961539	0.565455	0.254601	0.220563	0.763567	-0.0702564	0.952501	0.652073	0.528262	-0.271298	0.747294	0.211466	0.821859
AT5G22440	AT5G22440	AT5G22440	0.334792	0.783979	-0.41872	0.605752	-0.644391	0.290257	-0.657622	0.327601	-1.04629	0.062656	-0.281999	0.662209	0.26145	0.801646	0.375185	0.747758	0.432159	0.701765	0.828615	0.193948	0.355681	0.696681	0.291853	0.806832	0.588922	0.702174	-0.208576	0.8668	0.416976	0.712463
PPC2	AT2G42600	AT2G42600	-0.944029	0.0313634	-0.917438	0.0268059	-0.981928	0.00623789	-0.188562	0.727381	0.301545	0.471182	-0.991337	0.00459803	-0.471352	0.324995	-0.737212	0.118724	-0.679685	0.201219	-0.565339	0.174228	-1.05935	0.00733066	-0.694702	0.168321	-0.0475227	0.984395	-0.313147	0.64936	0.0151762	0.990636
RTFL12	AT4G13395	AT4G13395	2.84602	0.0426605	1.68012	0.257714	1.31919	0.296026	2.08226	0.10229	3.01023	0.00731451	0.608808	0.648132	3.4857	0.00280518	1.24656	0.529896	2.26688	0.16812	3.29314	0.00470646	2.81476	0.0301956	1.0996	0.592281	0.758971	0.850684	0.857192	0.707203	0.904022	0.700405
CAM4	AT1G66410	AT1G66410	-0.0580358	0.955823	0.522067	0.173714	1.09015	0.000221049	1.28678	2.17e-05	0.213489	0.560967	1.13834	7.9e-05	0.824793	0.0119509	0.271297	0.641413	0.479378	0.325045	1.06588	0.000518046	0.727105	0.0390161	0.660262	0.10642	-0.153979	0.901292	-0.270603	0.643806	-0.0720641	0.928302
HBP1	AT1G17100	AT1G17100	0.98346	0.0611285	-0.473656	0.407923	-0.709521	0.105861	0.222771	0.72085	-0.44775	0.335692	-0.175753	0.725495	-1.23335	0.00444304	-0.40266	0.596491	-0.823232	0.175098	-1.40671	0.000773106	-0.941744	0.0525418	-0.526033	0.440907	-0.0611233	0.984135	-0.123377	0.90476	-0.36364	0.67175
JAZ8	AT1G30135	AT1G30135	2.85949	0.0709685	2.33611	0.192134	2.34931	0.065104	2.1425	0.128775	3.66683	0.00651804	1.81486	0.155545	9.15684	2.08e-16	7.43601	2.48e-08	3.12141	0.0495683	5.8716	6.07e-07	6.21204	5.49e-06	3.16866	0.0368552	1.26702	0.731158	5.71824	0.00068634	0.484666	0.873114
emb2726	AT4G29060	AT4G29060	0.599188	0.2672	-0.522939	0.282718	-1.92136	9.08e-08	-0.557653	0.196835	-0.00504713	1	-0.634093	0.0951189	0.419265	0.417267	0.36817	0.581535	0.171597	0.851848	0.221917	0.685168	-0.146285	0.838331	0.0556208	0.959014	0.428892	0.67004	0.249698	0.737844	0.133117	0.882984
HD2B	AT5G22650	AT5G22650	-0.214066	0.852517	-0.95948	0.0868717	-1.30424	0.00533238	-0.365971	0.560031	-0.987329	0.0361586	0.388248	0.453694	-0.242962	0.777638	-0.0987746	0.9451	-0.0253538	0.987436	0.71645	0.185416	-0.0238538	0.986114	0.0193471	0.989434	0.646959	0.593832	-0.45126	0.602667	0.277588	0.785791
MLP423	AT1G24020	AT1G24020	0.954937	0.765708	1.60482	0.429196	-3.96696	0.0209698	0.622038	0.78758	2.81627	0.0612323	-0.692701	0.695292	1.21675	0.595267	1.51064	0.563462	-0.1571	0.970543	1.58377	0.393152	3.63077	0.0294902	2.36287	0.28167	1.75272	0.657698	4.14621	0.0474678	4.38757	0.0450499
HEMC	AT5G08280	AT5G08280	0.447525	0.606124	-0.241493	0.747584	-0.777141	0.119009	-1.52236	0.00146543	-0.387985	0.478352	-0.861566	0.070364	0.146862	0.892354	0.00516997	0.999105	0.0918901	0.946705	-0.0846809	0.931619	-0.145392	0.877452	-0.127172	0.916951	0.429971	0.766916	0.126184	0.914916	0.0492497	0.972895
PRPL28	AT2G33450	AT2G33450	0.502812	0.532081	-0.365849	0.59232	-1.42813	0.00174176	-0.834232	0.107389	0.35467	0.514727	-1.62977	0.000219656	0.618175	0.307845	-0.0326629	0.982416	-0.325795	0.743433	0.383298	0.540088	-0.0479966	0.965005	-0.403986	0.640873	0.603489	0.620181	0.403176	0.646819	-0.0383331	0.979358
CYP79F1	AT1G16410	AT1G16410	-0.90339	0.736792	-2.35957	0.132567	-1.24001	0.391552	0.435236	0.835343	1.54596	0.268151	-0.534893	0.727022	0.532608	0.835322	0.531252	0.869641	0.0701697	0.987313	0.328054	0.888477	0.669864	0.767079	-0.409255	0.897222	-0.80687	0.859831	0.946078	0.710154	0.279275	0.934776
APK	AT2G14750	AT2G14750	-0.877254	0.35148	-0.643495	0.448544	-0.654924	0.338704	0.26351	0.781907	0.72011	0.281074	0.172369	0.820825	1.25677	0.0693218	0.476244	0.694543	-0.488986	0.696297	1.44635	0.0245289	0.853271	0.294201	0.937599	0.307478	-0.536746	0.776243	0.483301	0.684912	0.221668	0.881543
ATHM2	AT4G03520	AT4G03520	-0.340134	0.422662	-0.592577	0.0558104	-0.620842	0.0199115	-0.422609	0.158983	0.499522	0.0626497	-0.88142	0.000452678	-0.24205	0.537401	-0.6559	0.0396236	-0.319753	0.491516	-0.449706	0.127494	-0.454286	0.169151	-0.347653	0.411659	0.19228	0.829618	0.0176033	0.980187	0.143722	0.804431
AT1G70420	AT1G70420	AT1G70420	-0.437306	0.825105	0.465267	0.723507	0.545002	0.583243	2.15737	0.0134099	2.48164	0.00198737	1.11763	0.197492	0.20607	0.924435	-0.572746	0.749498	1.08576	0.443424	1.09139	0.275522	4.58707	1.1e-08	0.913372	0.521825	-1.26343	0.553123	-1.6804	0.220696	-0.832598	0.622829
AT4G28080	AT4G28080	AT4G28080	0.142914	0.91403	-0.390834	0.574818	-3.24819	4.47e-13	-0.814969	0.131107	-0.350883	0.534362	-2.55477	6.56e-09	-0.44124	0.537038	0.475861	0.579141	-0.537398	0.535349	-1.2078	0.0153983	-0.968187	0.0902218	-0.298605	0.760737	0.073236	0.982389	0.285332	0.770919	-0.237606	0.825501
AT4G19410	AT4G19410	AT4G19410	0.723806	0.290436	-0.63501	0.295755	-1.73222	0.000116825	-1.97731	1.7e-05	-2.91312	6.47e-12	-1.89421	1.46e-05	-0.914374	0.0890262	-0.272382	0.794326	-0.468224	0.593586	-0.851477	0.0995644	-0.527481	0.418354	-0.900214	0.161665	-0.122829	0.964808	0.0329598	0.97859	-0.500615	0.58114
FLA9	AT1G03870	AT1G03870	1.47778	0.0306768	0.356222	0.680769	-1.11492	0.0574777	-2.69312	9.68e-07	-1.52573	0.00602631	-4.42843	1.7e-15	-0.474115	0.589408	0.318443	0.807505	1.2882	0.09275	-1.29472	0.0310732	-0.963564	0.178645	-0.779058	0.387552	0.439105	0.81514	-0.37034	0.746609	1.14055	0.244308
COB	AT5G60920	AT5G60920	-0.766789	0.257334	-0.837944	0.14589	-1.47053	0.00137367	-0.124101	0.874811	0.31394	0.574772	-2.2307	3.51e-07	-0.0234663	1	-0.0221497	0.988504	0.0427178	0.975653	0.107718	0.90293	-0.026281	0.984033	-0.0116675	0.993078	0.0582469	0.984395	0.423152	0.630014	0.361198	0.706427
AT2G20450	AT2G20450	AT2G20450	0.97672	0.187045	-0.449933	0.561497	-0.543092	0.370497	-0.140554	0.876247	-0.717361	0.212304	0.206284	0.750676	0.869981	0.183835	0.684072	0.418332	0.808239	0.346837	1.65487	0.00211307	0.944928	0.155621	0.84437	0.291584	0.805536	0.544982	-0.323479	0.768894	0.0987937	0.945152
CYP71B26	AT3G26290	AT3G26290	-0.933284	0.315757	0.926037	0.242738	1.75021	0.00360944	2.55344	2.19e-05	3.25485	7.82e-09	2.55494	7.25e-06	-1.03736	0.166548	-0.364845	0.79383	0.605071	0.606536	1.25906	0.0585149	1.07749	0.162494	1.15276	0.179759	-0.506142	0.799134	-0.914065	0.387538	-0.540875	0.669493
PGIP2	AT5G06870	AT5G06870	-1.2564	0.175461	-0.82077	0.37288	-1.77577	0.00834937	-1.0442	0.178542	0.387234	0.638615	-3.35905	1.47e-07	2.84587	9.2e-06	1.94797	0.0117879	-0.392496	0.798867	1.95278	0.00426043	2.12037	0.00333562	0.288276	0.849248	-0.128655	0.976196	1.04592	0.359138	-0.479634	0.731697
AT3G56360	AT3G56360	AT3G56360	2.53067	0.00507545	1.07368	0.308773	1.60513	0.0495991	2.51722	0.00205738	1.92387	0.0153324	-0.426757	0.648124	2.0786	0.0150459	-0.169588	0.945088	-0.0825985	0.970848	0.667069	0.539219	0.514643	0.700319	-0.152189	0.945781	0.0850144	0.988085	-0.758124	0.611793	-2.1674	0.0804573
AT1G72510	AT1G72510	AT1G72510	1.11551	0.0892313	0.870076	0.17091	1.11774	0.0303085	1.83564	0.000299551	2.35222	6.36e-07	0.530623	0.334466	2.26813	2.75e-06	1.35871	0.0239681	0.943454	0.209449	0.82092	0.158977	1.34371	0.0181824	0.913759	0.207258	-0.0672781	0.984395	-0.164815	0.894402	-0.30687	0.782852
CYS1	AT5G12140	AT5G12140	-0.0491035	0.967279	-0.182197	0.722961	0.129051	0.751672	0.746349	0.0326869	1.60862	8.04e-08	0.370174	0.285169	0.482912	0.241757	0.055972	0.956017	-0.298918	0.641712	0.440418	0.256816	0.273602	0.585615	-0.175276	0.805416	-0.210327	0.857647	0.118998	0.874468	0.118073	0.881614
SMT2	AT1G20330	AT1G20330	0.553802	0.241062	0.0595464	0.920132	-0.0740519	0.865995	-0.578393	0.119862	-0.166821	0.684283	-1.53322	6.6e-07	0.169622	0.779631	0.44751	0.380542	0.425312	0.451434	0.237072	0.607731	0.10437	0.87277	-0.117018	0.88404	0.25977	0.810808	-0.0928238	0.910284	-0.0513351	0.95495
BBX30	AT4G15248	AT4G15248	1.45833	0.0704836	2.39033	0.000348737	3.38543	1.47e-08	2.92943	1.86e-06	3.94634	8.63e-12	2.46885	3.95e-05	2.52139	4.01e-05	0.569414	0.636223	0.498979	0.711943	0.26106	0.805308	0.604919	0.52418	0.693916	0.536777	-0.234496	0.9376	0.407182	0.754358	-0.167581	0.920635
SOUL-1	AT2G37970	AT2G37970	0.564071	0.54551	0.881279	0.183145	1.22193	0.021363	0.498684	0.464902	0.0487877	0.951803	0.21792	0.730781	0.427196	0.610573	-0.305616	0.800039	-0.949754	0.230323	-0.699088	0.273345	-0.312147	0.731048	-0.519767	0.581558	-0.51828	0.744132	-0.991159	0.24634	-1.65752	0.0308461
AT4G17470	AT4G17470	AT4G17470	-2.61323	0.0299906	-0.241596	0.892999	0.109255	0.939373	0.853677	0.481236	3.26794	0.000354316	1.7646	0.0710341	4.61327	1.3e-07	4.52701	2.89e-06	1.57965	0.295852	5.15665	2.99e-09	6.15193	9.42e-12	5.35534	1.33e-08	2.31931	0.165423	4.91174	3.1e-06	3.15896	0.0181074
BAM1 AT3G23920	AT3G23920	AT3G23920	0.297474	0.760709	1.44493	0.0031333	2.22929	1.23e-07	1.10781	0.0204084	2.15262	2.42e-07	2.41649	4.19e-09	0.611358	0.299858	0.10199	0.940534	-0.685239	0.346313	-0.775215	0.128533	-0.0190496	0.989276	0.0549366	0.968969	-0.72347	0.513336	0.151654	0.888549	-1.06758	0.15183
AT1G55960	AT1G55960	AT1G55960	0.609087	0.53769	0.34544	0.691932	0.378812	0.575389	-1.57123	0.0076279	-0.0277876	0.979907	-1.12379	0.0502342	-3.28988	3.47e-10	-2.03914	0.000916017	-1.60137	0.027756	-3.81604	2.79e-13	-2.47685	1.67e-05	-1.19005	0.125713	-0.142731	0.966241	-0.217488	0.864908	-0.83591	0.433968
HEME2	AT2G40490	AT2G40490	-0.0365777	0.986311	-0.489871	0.431022	-1.28911	0.00384991	-1.49955	0.000970775	-0.503828	0.310609	-1.81373	1.93e-05	0.19343	0.826605	-0.184103	0.872481	-0.1856	0.868832	0.0285522	0.996495	-0.286062	0.703572	-0.422004	0.60458	0.479026	0.705118	0.254634	0.785513	-0.045209	0.97434
ADK1 AT3G09820	AT3G09820	AT3G09820	-0.575046	0.587779	-0.923339	0.213796	-1.53874	0.00830489	-1.06004	0.104526	0.465486	0.494346	-0.826314	0.173394	0.00906665	1	-0.103639	0.954793	-0.294462	0.834699	-0.0592124	0.975299	-0.0243903	0.989432	-0.231365	0.865375	0.410857	0.836963	0.716056	0.483862	0.617788	0.589171
AT1G24580	AT1G24580	AT1G24580	0.857391	0.677574	0.0356918	0.987089	2.92412	0.00433364	3.87114	0.000163111	3.77374	0.000112747	4.07829	2.72e-05	-1.76297	0.16876	-1.26874	0.455151	-0.866379	0.693721	-2.23922	0.0482564	-1.77576	0.176954	-0.761532	0.717404	-1.36232	0.622549	-0.533407	0.806445	-1.59471	0.437757
GRF6 AT5G10450	AT5G10450	AT5G10450	-0.0691831	0.933161	0.143185	0.748143	-0.0350892	0.927805	-0.513328	0.101631	-0.486479	0.0944062	-1.07045	4.99e-05	-0.374609	0.309761	-0.482048	0.219915	-0.430171	0.337265	-0.833409	0.00349715	-0.604351	0.0667354	-0.319925	0.501049	-0.251254	0.77169	-0.113939	0.855469	0.253113	0.658377
AT1G53903 AT1G53903	AT1G53903	AT1G53903	0.156868	0.965662	0.461064	0.783751	1.374	0.20571	1.94597	0.0755884	2.94797	0.00242566	1.32172	0.206923	6.46783	6.03e-13	5.88421	8.54e-10	3.16034	0.00750682	4.92126	1.5e-07	5.66494	4.48e-09	3.88342	0.000302574	-0.323175	0.950342	3.29802	0.0139176	1.12732	0.562716
ATCG00960	ATCG00960	ATCG00960	2.96568	1.84e-06	2.07211	0.00196653	1.7181	0.00521645	1.46178	0.0272667	2.41846	3.66e-05	1.85559	0.00186331	2.9135	6.44e-07	2.89534	4.37e-06	2.55714	0.000144761	3.02644	2.62e-07	2.42415	0.000150201	2.46245	0.000252169	0.0603714	0.991662	-0.717247	0.528487	-0.377915	0.783384
AT1G53903 AT1G53885	AT1G53885	AT1G53885	0.156869	0.965662	0.461053	0.783766	1.374	0.205837	1.94261	0.0762537	2.94797	0.00242982	1.32172	0.207013	6.46763	6.06e-13	5.88364	8.54e-10	3.16034	0.00750682	4.92054	1.5e-07	5.66364	4.48e-09	3.88342	0.000302574	-0.323177	0.950342	3.29801	0.0139176	1.1161	0.568435
ATCG01170	ATCG01170	ATCG01170	2.96328	1.84e-06	2.0699	0.00197468	1.7157	0.00528528	1.46091	0.0273333	2.4171	3.68e-05	1.85231	0.00189535	2.9111	6.55e-07	2.89304	4.4e-06	2.55617	0.000144761	3.0242	2.63e-07	2.42395	0.000150184	2.46052	0.000252169	0.0603364	0.991662	-0.717258	0.528487	-0.377912	0.783384
AT5G08760	AT5G08760	AT5G08760	1.21094	0.333228	0.435068	0.737597	1.00712	0.263821	-0.875151	0.39627	-1.14015	0.195849	-1.68937	0.0386663	1.34494	0.181254	0.587733	0.729019	0.755549	0.639864	-0.258975	0.855891	-0.300251	0.850705	0.124388	0.958672	-1.21829	0.55631	-1.11766	0.430235	-1.47854	0.317488
AT2G30766	AT2G30766	AT2G30766	7.78739	1.84e-06	1.01633	0.678826	-0.415365	0.843236	7.80639	7.39e-07	2.70007	0.105802	-2.56771	0.117239	3.62239	0.0461096	-1.81738	0.504794	-1.68963	0.56889	1.99067	0.32085	0.602227	0.846924	-2.43838	0.316145	3.17345	0.370069	-1.56239	0.599099	-4.68941	0.0534949
ndhF	ATCG01010	ATCG01010	0.769713	0.404675	-0.254047	0.789184	-0.699788	0.278992	0.129648	0.899755	1.35999	0.0182726	-1.91374	0.000681183	0.612465	0.458627	0.397811	0.746993	0.042866	0.980838	0.422092	0.602334	0.0645692	0.961984	-0.0647785	0.972204	-0.263914	0.911155	-0.602421	0.572089	-0.386632	0.75567
ARA12	AT5G67360	AT5G67360	0.369796	0.66931	-0.129492	0.863252	-0.544302	0.259455	0.47478	0.38699	0.102331	0.867692	-0.572667	0.213083	-0.646032	0.248357	0.185516	0.86627	-0.390803	0.653163	0.0625325	0.952271	-0.124368	0.889655	-0.172655	0.866542	-0.171132	0.931582	0.27392	0.759937	-0.165122	0.876432
COL3	AT2G24790	AT2G24790	0.341438	0.63872	-0.128863	0.841886	-0.835406	0.030778	0.171722	0.770176	-0.142789	0.773512	-1.48027	3.55e-05	0.223331	0.741866	0.447341	0.479322	0.169949	0.85749	0.230616	0.680281	0.0518421	0.952199	0.13471	0.883973	0.0477218	0.984395	0.261255	0.730932	0.23014	0.781198
AT5G42850	AT5G42850	AT5G42850	0.702312	0.111662	0.90562	0.0152111	1.41337	6.55e-06	1.17241	0.000487097	-0.185938	0.648989	1.43536	3.02e-06	0.416059	0.359952	0.795466	0.0507061	0.599637	0.226154	0.310233	0.484373	0.610295	0.13656	0.511327	0.306817	-0.194093	0.877194	0.133951	0.856792	-0.00366926	0.997954
PXMT1	AT1G66700	AT1G66700	-0.771682	0.839793	1.72802	0.345344	1.54017	0.307624	-1.30123	0.538976	-4.72353	0.00119896	3.08765	0.0211419	1.0472	0.671228	-2.16035	0.291002	-0.603547	0.858196	0.0808022	1	1.7946	0.336917	-0.114894	0.979305	-0.730196	0.907607	-3.45807	0.114367	-1.80005	0.483556
ERF-1	AT4G17500	AT4G17500	1.25088	0.560703	1.56894	0.327678	1.89407	0.136557	1.93559	0.162114	1.56251	0.23188	0.490754	0.734327	4.09156	0.00069142	2.70641	0.0739221	0.816767	0.754886	-0.149247	0.962499	3.85624	0.00291109	0.773276	0.752732	-0.740341	0.863803	1.30285	0.550534	-0.486869	0.864872
XTH4	AT2G06850	AT2G06850	-0.484014	0.78451	-0.850381	0.444715	-3.18199	4.25e-05	-3.05852	0.000112873	-0.501191	0.604899	-5.92977	1.68e-13	-1.38147	0.148965	-0.319051	0.877066	0.624356	0.704204	-1.52851	0.0815639	-0.799739	0.49532	-1.47893	0.19038	-0.548492	0.844134	0.665755	0.665468	0.863314	0.579534
AT1G72020	AT1G72020	AT1G72020	0.319421	0.40304	0.260461	0.431614	0.624892	0.00840952	0.159461	0.633917	0.541468	0.0235437	0.192449	0.468581	0.561496	0.0325101	0.2531	0.547645	0.238225	0.601659	0.588562	0.0188239	0.565	0.039256	0.116167	0.826164	0.0148332	0.998159	-0.258212	0.552388	-0.220513	0.651244
VDAC1	AT3G01280	AT3G01280	-0.175806	0.660214	-0.0695801	0.840723	0.130386	0.59212	0.021147	0.969918	-0.0350195	0.904185	0.443888	0.0270062	1.03823	4.54e-08	0.122603	0.787009	0.0838523	0.869755	1.10216	6.58e-09	0.57133	0.0103798	0.149948	0.705028	0.169533	0.794866	-0.323312	0.34703	-0.1085	0.811363
WAK1	AT1G21250	AT1G21250	0.125149	0.959916	-0.0708557	0.957646	0.315763	0.723194	-2.4174	0.0010166	-2.66572	0.00010173	-0.454849	0.581645	-0.304104	0.833113	-0.0379958	0.986574	0.40081	0.811273	-1.42922	0.0712167	0.0163605	0.996235	-0.17238	0.926998	-2.53913	0.0133526	-1.93224	0.0656554	-1.06862	0.426858
AT4G11211	AT4G11211	AT4G11211	1.26227	0.208813	1.18505	0.18582	-0.350166	0.693652	2.03127	0.0060377	3.03984	5.15e-06	-1.21471	0.0996762	1.43099	0.0802632	1.33054	0.170681	0.233166	0.900688	1.63042	0.0315279	0.654078	0.54152	0.962542	0.400376	0.0752317	0.988238	0.95988	0.437731	1.09287	0.410875
mtLPD1	AT1G48030	AT1G48030	-0.426293	0.157627	-0.844623	0.000349335	-1.33533	4.41e-10	-0.618911	0.00732159	0.10324	0.713673	-0.505061	0.0224856	-0.254522	0.408189	-0.306296	0.370554	-0.335528	0.354101	-0.632701	0.00533211	-0.565777	0.0240549	-0.478643	0.110635	0.369427	0.491834	0.130777	0.775664	-0.119304	0.811193
JAZ10	AT5G13220	AT5G13220	-1.5677	0.356315	1.12467	0.484738	1.00063	0.411946	-1.9322	0.116482	1.49218	0.216705	-0.625025	0.6211	6.20763	1.56e-10	6.60837	4.51e-10	3.51625	0.00464125	4.52965	8.4e-06	6.85599	5.25e-11	4.68179	2.25e-05	-1.80838	0.498725	4.82633	0.000384796	0.336542	0.90094
AT3G50685	AT3G50685	AT3G50685	-0.421836	0.532092	-0.608184	0.22419	-1.57947	3.45e-05	-0.0434804	0.965241	1.78662	7.04e-07	-0.999283	0.00899805	0.132892	0.875868	-0.66858	0.223155	-0.524619	0.427955	-0.446675	0.352722	-0.837903	0.0684574	-0.705261	0.205433	0.36156	0.758445	0.0537672	0.960168	-0.124825	0.898523
TPX1	AT1G65980	AT1G65980	0.152822	0.78674	0.208435	0.570371	0.567667	0.0254156	0.879887	0.000520609	0.205768	0.482019	0.427107	0.0943153	-0.0947538	0.861155	-0.0219998	0.977155	0.0307214	0.966642	-0.177979	0.617139	0.0454167	0.933133	-0.0287871	0.971259	-0.123783	0.902651	-0.0162539	0.9811	-0.107096	0.857721
NAC102	AT5G63790	AT5G63790	0.840903	0.579153	0.704459	0.559977	1.12552	0.212307	0.209188	0.884561	-0.919968	0.320589	1.0979	0.208002	0.295911	0.870894	-0.682714	0.676182	0.321764	0.87882	0.596164	0.612193	1.84494	0.0581693	0.383347	0.838146	-0.0514699	0.998342	-0.626048	0.705328	-1.20947	0.438475
CNX1	AT5G61790	AT5G61790	-0.667045	0.551079	-0.420151	0.661887	-0.72535	0.299794	-1.11881	0.116542	-1.48737	0.0181629	-0.814487	0.21866	-0.185205	0.902476	0.00882969	0.998463	0.095432	0.959137	0.268841	0.798967	0.640514	0.487766	0.513894	0.668936	-0.082278	0.984395	-0.992819	0.353701	-0.788886	0.513337
SWEET17	AT4G15920	AT4G15920	-1.1495	0.170961	-1.24389	0.0954674	-1.16991	0.0706555	0.976625	0.163083	2.28901	7.34e-05	0.0615137	0.94193	0.810052	0.313504	0.383547	0.773813	0.596086	0.613955	1.32413	0.0424675	1.36241	0.0561371	0.938807	0.310283	0.46948	0.818945	0.52294	0.655405	0.602655	0.622901
MEE31	AT3G02570	AT3G02570	-0.567746	0.427875	-0.404804	0.523936	-0.32268	0.54406	-1.06587	0.0231553	0.0706245	0.911491	-0.490196	0.309302	2.47271	9.07e-10	1.29825	0.00992784	0.157016	0.890803	1.93107	4.28e-06	1.39428	0.00314598	0.799123	0.20356	-0.0242781	0.999757	0.712735	0.333203	0.630796	0.444701
AT4G26230	AT4G26230	AT4G26230	0.503212	0.55486	-0.624848	0.329173	-1.05787	0.0313102	-0.743458	0.182057	-0.552062	0.297238	-0.751501	0.128798	0.106739	0.935354	0.208071	0.861719	0.0864571	0.951057	0.695846	0.217714	0.425089	0.559917	0.0655502	0.963608	0.647903	0.604873	0.147428	0.900942	0.371496	0.706844
IMD1	AT5G14200	AT5G14200	-1.67595	0.277015	-1.16633	0.419952	-1.64433	0.141351	-0.246285	0.893324	0.0537682	0.978331	-0.990167	0.387881	0.332277	0.891242	0.236244	0.940687	-0.348046	0.898964	0.00338392	1	0.220511	0.920581	-0.399115	0.873408	-0.371012	0.94169	1.33385	0.466821	0.432754	0.861948
RDUF1	AT3G46620	AT3G46620	1.71972	0.105295	0.858407	0.448195	1.44833	0.0871845	1.27471	0.174374	1.57998	0.0571005	0.385949	0.689766	2.3115	0.00631468	0.194014	0.935567	1.87798	0.0876787	1.81486	0.036329	1.62028	0.0979814	1.05681	0.421501	0.326008	0.927845	-0.687837	0.6609	0.550687	0.749838
SAP5	AT3G12630	AT3G12630	0.902026	0.0199122	1.36148	4.67e-05	1.63459	7.72e-08	1.076	0.00109879	0.62384	0.0605625	1.1009	0.000341199	1.0331	0.0017819	0.738951	0.0688381	0.856377	0.0398052	0.0304218	0.979984	0.719274	0.0581693	0.762522	0.0672275	-0.167529	0.896691	0.000874212	1	-0.00975102	0.992637
JAZ5	AT1G17380	AT1G17380	0.349513	0.897041	0.188417	0.917508	0.632203	0.593934	1.27477	0.289965	1.74439	0.0932579	-0.882992	0.424411	5.69668	5.56e-10	3.95202	0.000178669	1.16171	0.513625	2.98997	0.00316998	3.21194	0.00275987	1.3203	0.407961	-0.932882	0.764193	2.59987	0.0790291	0.076968	0.981142
AT5G48490	AT5G48490	AT5G48490	0.147173	0.984176	0.242562	0.929865	-4.33208	0.00555436	-2.98219	0.0758272	-2.39187	0.135542	-5.65719	0.000260095	-1.75265	0.405358	-1.22859	0.680729	-1.05147	0.75046	-1.20748	0.562056	-2.16648	0.285449	-1.67403	0.522125	1.21581	0.806508	1.18968	0.69021	1.49188	0.622829
ENODL19	AT4G12880	AT4G12880	-0.536852	0.676555	-1.12199	0.166253	-3.10806	1.12e-06	0.818406	0.293015	2.30944	0.000169501	-2.56264	3.52e-05	0.557629	0.575067	0.415962	0.76723	-0.0792003	0.966589	0.456861	0.614961	0.563978	0.567554	0.11567	0.949226	0.0197496	1	0.66693	0.573886	0.506803	0.703712
DGAT3	AT1G48300	AT1G48300	1.08831	0.252435	-0.24582	0.823727	-0.863055	0.226977	1.30998	0.0707191	-0.472385	0.544842	-1.30045	0.0475451	-1.66707	0.0195791	-1.20777	0.178574	-1.43827	0.112321	-1.48323	0.0352458	-1.58187	0.0351627	-1.40547	0.109031	-0.249829	0.935433	0.230461	0.88147	-0.905331	0.457444
AT4G30650	AT4G30650	AT4G30650	-0.137757	0.965979	-0.0245474	0.989486	0.129857	0.916106	2.15705	0.0204217	3.02978	0.00029276	1.10486	0.236739	3.15639	0.000259671	1.72616	0.141582	0.907052	0.587776	5.62219	2.73e-12	4.14321	2.22e-06	4.38098	8.81e-07	0.448299	0.898381	1.51371	0.300602	1.87297	0.213886
AT5G20160	AT5G20160	AT5G20160	0.0202361	0.995972	-0.611824	0.304915	-0.226872	0.684889	-0.363636	0.547625	-1.1721	0.00850239	0.0874882	0.882568	0.0660683	0.96063	0.184042	0.873397	0.345238	0.715345	0.952279	0.0510985	0.564378	0.365337	0.454957	0.570945	0.604351	0.612362	-0.660359	0.39028	0.189104	0.85994
AT3G48140	AT3G48140	AT3G48140	0.275779	0.575413	0.455008	0.182072	0.646583	0.0178376	-0.762565	0.00733658	-0.643586	0.0177974	-0.926439	0.000341199	0.172241	0.718281	-0.16503	0.786877	-0.0474126	0.952509	-0.0902053	0.848746	0.0391673	0.949158	-0.194241	0.716333	-0.0979657	0.93963	-0.351634	0.460628	-0.177933	0.75937
AGP17	AT2G23130	AT2G23130	-0.071421	0.982759	-0.631677	0.534312	0.130814	0.889345	-3.0508	9.59e-06	-0.117533	0.907472	-2.90749	1.63e-05	-1.06421	0.229721	0.113761	0.95901	1.73988	0.0601566	-0.788362	0.369855	-0.944066	0.323736	-0.995046	0.37053	0.234254	0.947771	-0.347946	0.815819	0.52438	0.718554
AT5G43450	AT5G43450	AT5G43450	-0.472374	0.831473	-0.846095	0.528343	0.690672	0.529592	0.837143	0.495168	-1.48084	0.132622	1.70785	0.0700926	-0.517274	0.762764	-1.45133	0.291562	-0.142693	0.959137	-1.95967	0.0563928	-0.382627	0.831003	-0.614363	0.745957	-1.37463	0.566251	-2.75932	0.0359121	-0.0822491	0.977991
AT3G28940	AT3G28940	AT3G28940	-0.180305	0.879966	0.13734	0.862302	0.765644	0.112533	0.336526	0.593816	-0.104708	0.870858	0.844815	0.0677296	0.641645	0.28253	-0.0149019	0.992256	-0.0111046	0.995346	-0.325093	0.616647	0.364514	0.613925	-0.456998	0.577507	-0.773768	0.490971	-0.861771	0.246585	-0.499665	0.578802
AT2G44410	AT2G44410	AT2G44410	-0.0165619	0.998405	0.313614	0.641987	-0.0076758	0.991309	0.243104	0.721946	-2.47685	2.22e-09	0.160413	0.770158	0.0451445	0.981466	0.223788	0.834134	0.0679799	0.959137	-0.0958553	0.915469	0.0291484	0.981372	0.188875	0.853959	-0.283544	0.862699	0.11193	0.920718	-0.250859	0.800408
AT1G72430	AT1G72430	AT1G72430	0.800705	0.421651	0.00660165	0.996154	0.0353258	0.969207	-1.07049	0.123985	-0.206441	0.800988	-1.74472	0.00336532	0.148698	0.927402	0.543756	0.641392	0.827638	0.425516	-0.555443	0.497855	-0.151882	0.905287	-0.172286	0.912867	0.216722	0.942064	0.0700701	0.967223	0.244273	0.866953
AT1G75460	AT1G75460	AT1G75460	-1.20673	0.0916972	-0.495158	0.536304	-0.943335	0.106345	-0.0902514	0.937225	1.85551	0.000449088	-1.04261	0.0623769	-0.371677	0.695043	-0.946782	0.226937	-1.06677	0.18952	-0.212107	0.820085	-0.294062	0.764061	-0.946741	0.241286	-0.162413	0.959233	-0.0724057	0.962221	-0.729204	0.485853
RCI2A	AT3G05880	AT3G05880	1.13463	0.168658	1.3856	0.0485274	1.91754	0.00105199	-0.00145468	1	1.46202	0.0142716	3.60583	4.24e-11	0.608231	0.486712	0.685403	0.501859	1.00138	0.281458	1.96709	0.00109229	1.41709	0.0404634	2.34925	0.000320959	-0.0964464	0.981534	0.552536	0.627178	0.730362	0.530539
RS2Z33	AT2G37340	AT2G37340	0.265599	0.711831	0.154596	0.785317	-0.0724051	0.87652	0.578967	0.146285	-0.570382	0.117563	0.289331	0.454559	0.0523874	0.959365	0.572254	0.24876	0.392767	0.53657	-0.150244	0.796989	0.316381	0.544383	0.377679	0.530476	0.116656	0.947855	0.35885	0.573567	0.54265	0.400824
AT2G25450	AT2G25450	AT2G25450	-0.580747	0.740232	-0.12478	0.934182	1.51637	0.0758544	1.16923	0.231084	1.20391	0.170774	1.29463	0.125253	0.618157	0.6483	0.0206655	0.994738	0.133507	0.956356	0.556248	0.636874	0.173949	0.920507	-0.169597	0.939924	-0.135873	0.980064	0.403289	0.818856	-0.665414	0.694356
ELF5A-3	AT1G69410	AT1G69410	-0.687641	0.4247	-0.417491	0.592727	0.969208	0.0769149	0.0775406	0.9473	-0.679976	0.236519	1.29758	0.0119518	-0.556273	0.465121	-1.00962	0.157448	-0.384844	0.733406	-0.805692	0.191443	-0.789707	0.256616	-0.519356	0.584596	-0.755637	0.579045	-1.11765	0.173765	-1.06252	0.249367
TSA1 AT3G54640	AT3G54640	AT3G54640	-0.587442	0.4247	0.315108	0.641329	0.33688	0.521547	-0.455098	0.427352	-0.603332	0.212806	-0.00336584	0.998841	0.859609	0.0996005	0.0793064	0.954793	-0.272578	0.789611	2.86959	3e-12	1.81266	6.79e-05	1.30917	0.013207	-0.0180604	1	-0.0795071	0.946978	0.168713	0.876378
TOPP1	AT2G29400	AT2G29400	0.00255391	1	0.313424	0.34667	-0.00247388	0.99601	0.253036	0.443043	-2.40392	5.98e-27	-0.92474	0.000103551	-0.249976	0.520795	-0.215908	0.648609	-0.0766622	0.908033	-0.880004	0.000851357	-0.298277	0.389657	-0.040645	0.954928	-0.306505	0.667179	0.224111	0.633703	-0.0787265	0.900727
LARP6b	AT2G43970	AT2G43970	-0.403182	0.238651	-0.292784	0.360101	-0.77219	0.000863564	-0.408668	0.129095	-0.791594	0.000492481	-0.623206	0.0068656	-0.699787	0.00464348	0.137163	0.799364	-0.157308	0.762274	-0.774799	0.00119042	-0.0513094	0.918642	-0.00866029	0.990113	-0.818038	0.0146668	-0.281546	0.503988	-0.483327	0.240297
F16M2_10	AT3G63160	AT3G63160	1.1574	0.341006	-0.227717	0.86749	-1.92066	0.0163086	-1.70247	0.0493003	-0.602556	0.520514	0.0529238	0.962031	0.222449	0.908798	-0.298449	0.885272	-0.0695555	0.977049	-0.188774	0.899226	-0.885611	0.433857	-0.415561	0.811276	0.290789	0.938695	-0.285539	0.877188	-0.446307	0.798922
AT5G66052	AT5G66052	AT5G66052	1.98649	0.092435	-0.105008	0.951185	1.41765	0.144019	3.66988	4.3e-05	1.18269	0.229166	2.2116	0.0130997	0.623135	0.689906	-0.20407	0.940687	0.753743	0.684889	-0.0253493	1	-0.845046	0.534065	0.49686	0.803284	-1.82056	0.366612	-1.31048	0.396768	0.316055	0.888921
AXS1	AT2G27860	AT2G27860	0.174803	0.767425	0.161462	0.700955	-0.0304317	0.936046	-0.224229	0.532447	0.284734	0.346696	-1.05736	3.68e-05	0.525489	0.0931221	0.770337	0.0139801	0.595186	0.109662	0.584038	0.0438488	0.51525	0.118141	0.658134	0.0554731	-0.0558912	0.973801	0.526686	0.220478	0.405115	0.420668
NF-YB2	AT5G47640	AT5G47640	0.081695	0.963874	0.283585	0.717725	0.23363	0.707948	1.80251	0.00028452	2.50044	4.91e-08	-0.214686	0.722407	-2.25459	2.93e-06	-1.83116	0.000753908	-0.622006	0.483674	-1.77587	0.000359875	-1.64023	0.00233861	-0.794177	0.299222	-0.598566	0.657698	-0.559204	0.536662	-0.623879	0.520765
AT1G69840	AT1G69840	AT1G69840	0.0457282	0.984555	-0.0879395	0.920179	0.490549	0.372519	-0.198533	0.798196	-1.76954	0.000147838	-0.248141	0.666357	1.1217	0.0388928	-0.134583	0.923504	-0.0740848	0.959137	-0.275152	0.711523	-0.308859	0.707604	-0.25403	0.813106	-1.04283	0.312213	-0.296465	0.768956	-0.247991	0.822404
HMGB3	AT1G20696	AT1G20696	0.430281	0.485281	0.575944	0.211449	0.934451	0.00946757	1.2238	0.000885789	0.0408908	0.9406	0.813721	0.0226073	0.678622	0.112376	-0.0242919	0.983364	0.20111	0.811939	0.786419	0.0440718	0.320892	0.560327	0.625431	0.232506	-0.137934	0.935894	-0.524965	0.396096	-0.309008	0.679682
AT3G06125	AT3G06125	AT3G06125	0.959873	0.0781523	0.727679	0.170447	1.11204	0.00840259	1.23933	0.00479153	1.6205	5.47e-05	0.449042	0.327484	0.35174	0.596766	0.333155	0.694505	0.597346	0.399471	0.352159	0.541963	0.229766	0.759728	0.218007	0.815706	-0.0146238	1	0.110561	0.917534	0.0555152	0.964086
AT4G25740	AT4G25740	AT4G25740	0.259966	0.78347	-0.25237	0.702177	-1.01244	0.0190218	-0.49755	0.341326	-0.421245	0.380256	-1.14312	0.00590015	0.479472	0.419074	0.507302	0.471188	0.252017	0.796417	0.651379	0.185335	0.350472	0.595854	0.091302	0.936729	0.73226	0.469929	0.30561	0.719088	0.508165	0.535342
AT4G13615	AT4G13615	AT4G13615	0.412054	0.533634	0.6553	0.163564	1.13457	0.00214792	0.791995	0.0556077	0.817282	0.0319055	-0.0728524	0.882824	0.786967	0.0673443	0.428553	0.504699	0.795422	0.134862	0.592587	0.175135	0.645569	0.177656	0.644474	0.241286	-0.101128	0.964496	-0.315578	0.666607	-0.258495	0.748556
HCT	AT5G48930	AT5G48930	-0.698452	0.169241	-0.737624	0.102271	-0.680305	0.0796906	-1.15074	0.00237868	0.504111	0.206167	-0.663787	0.0781227	-0.921253	0.021458	-1.00513	0.0223928	-1.11121	0.0158039	-1.54227	1.75e-05	-1.20189	0.00266095	-1.33621	0.00139576	0.269761	0.830358	-0.0127497	0.989685	-0.135083	0.881543
AT5G55150	AT5G55150	AT5G55150	2.19529	0.606944	1.06223	0.700845	0.357044	0.884074	-0.697796	0.874084	-9.00559	2.82e-05	0.458483	0.842417	1.08257	0.816712	-0.524301	0.918471	0.816918	0.856765	1.32779	0.702136	3.07674	0.171248	0.945426	0.81246	-1.4912	0.878207	-1.99188	0.537992	1.66822	0.650305
POR C	AT1G03630	AT1G03630	-0.324954	0.679324	-0.858243	0.0677744	-2.4833	9.06e-11	-0.342235	0.509027	0.706352	0.083918	-1.88998	3.93e-07	0.139347	0.870865	-0.236538	0.790554	-0.282944	0.738862	-0.0929458	0.900113	-0.405348	0.481974	-0.355277	0.628969	0.50288	0.629891	0.428639	0.549293	0.395914	0.615506
BCAT4	AT3G19710	AT3G19710	-0.832786	0.793784	-2.08623	0.257067	-0.686557	0.694077	0.817887	0.692467	1.85411	0.226778	-0.114882	0.953203	0.988964	0.680468	0.598177	0.866965	-0.0283431	0.995926	0.784638	0.716462	1.05616	0.641174	-0.0148647	0.997607	-1.73763	0.652057	0.796039	0.787997	-0.0235574	0.996487
CAM2	AT2G41110	AT2G41110	1.11979	0.0503718	0.381077	0.569798	0.532018	0.294837	-1.50184	0.00143644	-1.48519	0.000844318	-0.702874	0.137732	2.53425	2.43e-09	1.39749	0.00732528	0.762702	0.279778	1.45705	0.00161934	1.27634	0.0117802	0.565613	0.452683	-0.254853	0.88472	-0.168024	0.87465	-0.635274	0.457337
PBS3	AT5G13320	AT5G13320	1.23629	0.565647	1.72584	0.266478	1.96514	0.117186	-0.321214	0.874864	-2.27005	0.0655105	0.284871	0.850834	0.284039	0.929925	-0.481121	0.876523	0.728914	0.788032	0.0105499	1	2.13763	0.151573	0.665321	0.796152	0.633413	0.892156	-2.57604	0.167884	-0.975023	0.691502
CRT1b	AT1G09210	AT1G09210	-0.577696	0.608744	-0.620566	0.465337	-1.03431	0.103383	-1.26997	0.0561173	-2.13035	0.000231985	-1.64727	0.00501581	-0.106402	0.949863	-0.565873	0.614097	-0.243618	0.873438	0.0866444	0.952141	-0.00551173	1	0.0657708	0.972643	0.0949438	0.982081	-0.684382	0.530175	-0.746184	0.519946
AT4G34950	AT4G34950	AT4G34950	-2.9483	0.000342792	-2.78459	0.000654502	-0.731283	0.400931	-2.5157	0.00130372	-2.19248	0.00336676	-3.09392	2.1e-05	-1.37598	0.131087	-1.76592	0.0656447	0.485095	0.776931	1.51495	0.0704641	0.0263971	0.99216	0.653316	0.651688	-1.11043	0.569173	-1.36037	0.27933	-0.284498	0.878334
AT3G10930	AT3G10930	AT3G10930	1.27921	0.497783	0.464615	0.798584	1.25944	0.306668	-0.444631	0.799223	-1.3323	0.272724	0.421319	0.755557	1.28721	0.39998	-0.212867	0.950841	3.25673	0.0172904	0.297381	0.882957	2.18993	0.100345	1.40536	0.437537	-1.68201	0.544831	-2.60025	0.125513	1.12216	0.611633
CYSC1	AT3G61440	AT3G61440	0.0260533	0.982748	0.0280711	0.954182	-0.438992	0.105119	-0.652664	0.0159048	0.544189	0.0355413	-0.557771	0.0287209	-0.380798	0.241599	-0.586275	0.0695454	-0.466087	0.226412	-0.694936	0.00878682	-0.389202	0.249081	-0.660893	0.0396516	-0.252284	0.740704	-0.385992	0.380459	-0.413103	0.380563
AT3G11120	AT3G11120	AT3G11120	1.03617	0.0962427	0.36136	0.612623	0.0186944	0.978841	0.284809	0.68163	0.593285	0.25716	-0.106772	0.862876	1.31357	0.00932023	1.1588	0.0484747	0.799925	0.279421	1.32667	0.00732247	1.20575	0.0264141	0.5023	0.550281	0.769249	0.512832	0.681676	0.406111	0.658097	0.460832
AT3G17800	AT3G17800	AT3G17800	1.17357	0.0814601	0.48783	0.511342	1.01099	0.060761	0.995595	0.0873572	1.08709	0.0399522	-0.0708496	0.919041	1.57223	0.00354047	-0.563151	0.538322	-0.548356	0.575485	0.542203	0.419148	-0.625117	0.393689	-0.232958	0.844361	-0.197127	0.936277	-0.0889408	0.95046	-0.220967	0.859038
CXE12	AT3G48690	AT3G48690	0.213242	0.799552	0.38986	0.451096	1.04106	0.00439911	1.01578	0.00878474	1.44761	3.41e-05	1.62303	2.4e-06	-0.135059	0.86635	-0.19694	0.821034	-0.58818	0.317375	-0.0263758	0.992423	-0.186861	0.780358	-0.303953	0.668715	-0.132006	0.940864	0.0574361	0.95502	-0.418048	0.56454
AT1G50020	AT1G50020	AT1G50020	-0.100605	0.898357	0.0391915	0.941541	0.930668	0.00104785	0.220554	0.575177	1.19722	1.16e-05	0.515495	0.08124	-0.359259	0.36241	-0.696798	0.0533496	-0.568999	0.184936	-0.71054	0.0204035	-0.601307	0.0846956	-0.450967	0.310393	-0.242988	0.793962	-0.241213	0.66988	-0.528203	0.320076
AT5G11420	AT5G11420	AT5G11420	-0.147085	0.930048	-0.997724	0.169034	-3.91215	1.49e-12	-1.72902	0.00391486	-1.05488	0.0792833	-4.98392	8.91e-20	-1.05381	0.125381	-0.966996	0.244355	-0.770972	0.435056	-1.20249	0.0564925	-1.43136	0.0304778	-1.5557	0.029926	0.0686623	0.985099	-0.142169	0.922344	0.243543	0.859449
AT3G08740	AT3G08740	AT3G08740	0.265858	0.796325	-0.457792	0.477877	-0.800142	0.0971025	-0.819682	0.110916	-0.0855623	0.896079	-0.569893	0.239289	0.44689	0.50507	0.0383022	0.978589	0.347108	0.716722	0.350578	0.579968	-0.0787651	0.936327	-0.039904	0.978672	0.65822	0.571841	0.271224	0.773389	0.234238	0.820976
AT1G29670	AT1G29670	AT1G29670	-1.40818	0.130327	-1.93855	0.0136651	-4.7223	1.02e-11	-1.08344	0.180301	-0.148733	0.8804	-4.78046	8.54e-13	0.315253	0.816674	0.132838	0.951339	-0.00778087	0.997594	0.46413	0.642349	0.102695	0.947732	-0.240924	0.887967	-0.0169127	1	0.371073	0.801687	0.832647	0.536144
AT4G12600	AT4G12600	AT4G12600	-0.0391481	0.990358	-1.01255	0.170853	-1.46108	0.0157695	-0.405848	0.624036	-1.62077	0.0051859	-0.282349	0.689155	0.443662	0.648052	0.095093	0.95901	0.422457	0.739493	1.28723	0.0426145	0.298338	0.779285	0.437412	0.704799	0.971177	0.503746	-0.371086	0.759261	0.513685	0.673839
NUDT8	AT5G47240	AT5G47240	-2.09325	0.0714943	-2.10847	0.0675807	-2.11796	0.0357145	0.504108	0.69913	2.2352	0.0115453	-0.317706	0.776588	4.6237	2.44e-08	3.37824	0.000406747	0.98476	0.550185	1.88348	0.0489245	3.01808	0.00151846	1.88229	0.118111	-0.788145	0.776243	2.66346	0.0339382	1.39537	0.401
PAP1 AT1G56650	AT1G56650	AT1G56650	-1.13495	0.41805	-0.646496	0.61573	3.54516	1.18e-05	4.05494	8.93e-07	4.34414	3.05e-08	4.28157	4.8e-08	1.74454	0.0730288	0.835284	0.589471	1.61124	0.200769	2.36487	0.00710393	2.05955	0.0343236	2.77201	0.00470673	-0.919965	0.705832	0.486813	0.785087	0.920268	0.585648
LIL3:1	AT4G17600	AT4G17600	0.224581	0.844462	-0.323151	0.653697	-1.30613	0.00604493	-0.818342	0.126654	0.75785	0.128005	-1.55186	0.000684739	0.313594	0.700916	-0.0150438	0.992369	0.123941	0.924472	-0.0325589	0.993644	-0.285017	0.725057	-0.0615235	0.966347	0.3735	0.810748	0.253436	0.800392	0.185047	0.870278
RL4	AT2G18328	AT2G18328	0.370382	0.847059	-0.268544	0.84134	-0.524552	0.578713	0.140834	0.928501	1.22003	0.142876	-2.35725	0.00219646	0.301853	0.856362	0.088671	0.971646	0.00177667	0.999737	-0.180573	0.904492	-0.185858	0.910418	-0.253151	0.897436	-0.425577	0.887048	-0.767199	0.600674	-0.369414	0.841191
KCS1	AT1G01120	AT1G01120	0.544694	0.647393	-0.980983	0.213938	-1.25106	0.0524144	-1.47847	0.0252397	-0.173961	0.837271	-3.02248	4.03e-07	0.341221	0.760555	0.54726	0.640722	0.409709	0.764533	-0.668646	0.392476	-1.23873	0.0967229	-0.873668	0.373941	-0.592275	0.748748	-0.587092	0.611435	0.17914	0.908944
RHM1	AT1G78570	AT1G78570	-0.116503	0.947585	-0.656289	0.389181	-0.545259	0.390005	-1.17945	0.0539421	-0.544471	0.391153	-0.775513	0.184595	-0.818017	0.252167	-0.531541	0.606088	-0.723076	0.451839	-0.967192	0.126023	-0.207537	0.849343	-0.374464	0.738553	0.288775	0.895522	0.460625	0.670425	0.334383	0.783384
CXIP1	AT3G54900	AT3G54900	-0.0123176	0.999339	-0.398674	0.468792	-0.550589	0.193026	-0.0761934	0.917934	0.698335	0.0845464	-1.12908	0.00282817	0.104042	0.915211	-0.418685	0.541092	-0.421578	0.559042	-0.0403527	0.974712	-0.355917	0.545575	-0.625845	0.285388	0.277759	0.83521	0.0113547	0.99144	-0.0253949	0.985693
AT2G37750	AT2G37750	AT2G37750	2.71594	0.0620165	5.75049	1.46e-08	5.06967	1.19e-07	2.50443	0.0447333	0.072784	0.967464	1.03858	0.347881	1.66769	0.269733	1.13698	0.538322	0.463673	0.855262	1.33635	0.358878	3.06825	0.00747664	2.10226	0.129601	0.394646	0.950342	-0.153245	0.959613	-2.89227	0.0727513
ATH13	AT5G64940	AT5G64940	-0.108121	0.827336	-0.43935	0.0859002	-0.622922	0.00360605	-0.562151	0.0112412	0.209951	0.379573	-0.53463	0.0110093	-0.493177	0.0342854	-0.596456	0.0163217	-0.589146	0.0310068	-0.809829	9.53e-05	-0.953119	8.41e-06	-0.886933	0.000130074	0.0941068	0.914095	-0.014236	0.980187	-0.362405	0.356989
CYP706A1	AT4G22690	AT4G22690	-0.148368	0.906827	-0.490932	0.447491	-0.901082	0.0605258	0.265389	0.69461	0.782762	0.104589	0.794177	0.090758	0.731111	0.20201	0.537255	0.489291	0.431596	0.634335	-0.13708	0.866954	0.143614	0.876994	-0.269171	0.783653	-0.533601	0.671193	-0.00221396	1	0.12728	0.913725
VHA-E3	AT1G64200	AT1G64200	-0.208672	0.843538	0.472809	0.436806	0.134799	0.811567	0.119636	0.869647	0.495912	0.302973	-1.55224	0.000287502	3.03932	6.94e-15	2.27355	1.1e-07	0.629623	0.379134	3.07892	4.75e-15	2.77181	1.17e-11	2.0572	3.49e-06	0.697265	0.512832	1.9778	0.000162101	0.634541	0.434193
UBC2	AT2G02760	AT2G02760	0.344131	0.482154	0.568343	0.102295	0.788469	0.00560568	0.902338	0.00224902	-0.119056	0.748547	0.198502	0.542737	-0.0265406	0.983527	0.232286	0.681098	0.419168	0.376497	-0.0108142	1	0.112268	0.840206	0.33845	0.483539	-0.352129	0.655239	0.0508643	0.947133	-0.140036	0.83305
AT1G52870	AT1G52870	AT1G52870	-0.325791	0.770763	-0.284789	0.722937	-0.08118	0.907153	0.500306	0.441118	0.921242	0.0800042	-0.822098	0.116539	-0.627217	0.364328	-0.696262	0.377595	-0.643905	0.467685	-1.20202	0.0260817	-0.691462	0.31579	-0.479872	0.604776	-0.256755	0.899127	0.018438	0.988899	-0.341612	0.753782
NSP5	AT5G48180	AT5G48180	0.0126714	1	1.09277	0.0314234	2.22654	6.72e-08	0.361639	0.539776	0.601068	0.206632	1.90202	3.31e-06	-0.319854	0.668165	-0.00212256	1	-0.32032	0.733986	-0.254257	0.703051	0.472906	0.457841	0.362871	0.66595	-0.310157	0.840436	-0.231443	0.804256	-1.22009	0.0727513
AT5G09510	AT5G09510	AT5G09510	-0.320255	0.613571	-0.74451	0.0631489	-0.806349	0.0191454	-0.905958	0.0110838	-1.30319	4.79e-05	-0.736477	0.0289056	-0.149835	0.821856	-0.109952	0.905396	-0.118166	0.892685	0.316872	0.478254	-0.0948657	0.89135	-0.197577	0.783314	0.577966	0.475953	-0.0136979	0.987589	0.367723	0.579319
ALB3	AT2G28800	AT2G28800	-0.317611	0.42089	-0.436929	0.149909	-0.648855	0.00853216	-0.334215	0.247928	0.34598	0.183279	-0.890519	0.000138193	-0.0175178	0.9918	-0.47338	0.148583	-0.483833	0.176049	-0.185508	0.582649	-0.604228	0.0292688	-0.521032	0.115106	0.239718	0.740159	0.342427	0.41281	0.190539	0.705261
RAN2	AT5G20020	AT5G20020	0.0615182	0.916706	0.126726	0.690611	0.707323	0.00047495	-0.141633	0.62873	-1.15207	1.5e-09	0.689333	0.000504184	0.275323	0.320468	0.159999	0.697678	0.575334	0.0293331	0.940078	2.32e-06	0.304871	0.260873	0.576419	0.0229918	0.246824	0.661978	-0.363605	0.285	0.0181134	0.978233
AT2G34930	AT2G34930	AT2G34930	-0.362428	0.872433	-1.40541	0.269921	-0.538824	0.641264	-0.91159	0.412835	1.04909	0.285543	-1.33088	0.191734	5.13814	1.26e-10	3.44042	0.00024708	1.3351	0.357745	3.80889	5.14e-06	3.72475	3.37e-05	3.44425	0.000335512	-0.426727	0.90355	2.89705	0.0147849	1.48944	0.362484
HVA22D	AT4G24960	AT4G24960	1.02342	0.176745	0.680779	0.357699	1.21571	0.0285603	0.995747	0.105955	1.59813	0.00270741	0.270909	0.676183	2.58547	6.16e-07	0.13923	0.930488	-0.514449	0.633921	1.84723	0.0007506	0.938766	0.175999	0.725052	0.411329	-0.680413	0.64799	0.120725	0.930836	-0.593828	0.583188
AT5G02230	AT5G02230	AT5G02230	0.246115	0.877865	1.13901	0.137401	2.16464	0.000303896	2.07529	0.000970775	3.00945	1.79e-07	2.77034	1.53e-06	0.0999857	0.955281	0.140197	0.94096	0.507355	0.690758	-0.322062	0.740129	0.500757	0.60901	0.743095	0.475438	-0.799497	0.626901	-0.241884	0.864407	-1.17133	0.29744
AT1G18210	AT1G18210	AT1G18210	0.599378	0.402231	0.280676	0.680737	0.194862	0.722942	-0.464376	0.414247	-1.39111	0.00126436	-0.654202	0.15539	3.21488	1.45e-15	1.36918	0.00644167	-0.148294	0.898457	1.16805	0.0119658	1.06133	0.0369786	0.339898	0.692679	-0.0100028	1	0.14035	0.897146	-0.514144	0.550255
AT5G47030	AT5G47030	AT5G47030	0.196872	0.678981	-0.164478	0.650034	-0.0372511	0.909054	-0.275662	0.348509	0.262992	0.32104	0.0288209	0.928891	0.303966	0.341842	0.108729	0.853134	0.0528255	0.938473	0.133283	0.712148	0.119399	0.782179	-0.0978274	0.859494	0.198849	0.794606	-0.0590493	0.921599	-0.0871295	0.881543
AT5G21090	AT5G21090	AT5G21090	-0.832065	0.123828	-0.545539	0.310673	-0.423879	0.352572	-0.617517	0.19304	-0.650404	0.128554	-1.03421	0.00901735	-0.282377	0.683016	-0.758905	0.171241	-0.849037	0.139893	-0.647787	0.166987	-0.609747	0.254759	-0.977348	0.0597842	-0.318133	0.814663	-0.539892	0.445919	-0.63006	0.403575
WRKY15	AT2G23320	AT2G23320	1.28289	0.262358	2.24055	0.0101944	2.60153	0.000598841	0.126623	0.938587	-1.19726	0.15007	1.4018	0.0766254	1.9345	0.0233441	1.48628	0.160744	1.27984	0.293003	-0.598496	0.585983	1.87905	0.0364305	0.72363	0.613533	-0.639163	0.804107	-0.0921277	0.965846	-0.32529	0.861541
AT1G64680	AT1G64680	AT1G64680	-0.135744	0.884323	-1.09455	0.00565089	-1.75244	3.95e-07	0.0661148	0.92438	0.393733	0.3217	-0.898348	0.0107571	-0.648136	0.126717	-0.850562	0.0548278	-0.577122	0.305573	-0.783243	0.0414111	-0.941506	0.0191215	-0.656227	0.199266	-0.00495205	1	0.0906134	0.919257	0.040155	0.9706
AT2G04070	AT2G04070	AT2G04070	0.108741	0.986357	-0.804139	0.678599	0.238823	0.888542	-1.66299	0.327652	-7.57779	1.14e-09	-0.534876	0.727639	-2.35915	0.195335	-1.48133	0.484226	0.287389	0.937066	-1.71941	0.308	0.630894	0.783115	-0.601805	0.832618	-1.62299	0.669206	-3.47689	0.0563362	-0.0368596	0.992895
AT3G56020	AT3G56020	AT3G56020	1.5108	0.00791663	1.13524	0.0497058	1.00862	0.046691	0.483458	0.445571	0.396552	0.493987	0.665355	0.199111	1.6228	0.00119035	1.42707	0.0127772	1.16248	0.0810148	1.54526	0.00201398	1.39977	0.0104078	0.92821	0.182697	0.845648	0.476661	0.851272	0.30025	0.618499	0.513716
AT5G40450	AT5G40450	AT5G40450	2.52046	3.45e-05	2.32599	0.000166396	2.05592	0.000303257	-0.215639	0.822485	-0.603098	0.368218	-0.0535778	0.948096	1.41966	0.0282856	1.37413	0.0629521	1.03443	0.247445	1.86497	0.00177586	0.945313	0.217152	0.522298	0.636515	-1.13394	0.388348	-0.654946	0.54347	-0.0360757	0.986498
AT2G37660	AT2G37660	AT2G37660	0.172299	0.893377	-0.663028	0.302488	-1.96855	2.93e-05	-1.17435	0.0235035	-0.0598993	0.93445	-1.69196	0.00027272	0.0682072	0.962477	-0.486323	0.579586	-0.435386	0.652916	-0.258622	0.730285	-0.404342	0.592685	-0.480428	0.581158	0.555647	0.674816	0.0640674	0.961993	-0.162401	0.893544
PLA2A	AT2G26560	AT2G26560	0.455155	0.908011	1.61544	0.399905	1.74071	0.256285	-2.57898	0.142896	-4.38602	0.00300404	1.174	0.447429	0.61236	0.829417	0.954943	0.750575	1.73623	0.475307	-1.13947	0.571554	4.59049	0.00222659	1.33963	0.595119	-2.367	0.540017	-1.50055	0.563938	0.385966	0.913078
AT1G32928	AT1G32928	AT1G32928	1.58372	0.311161	0.914732	0.545442	1.4294	0.207445	1.11365	0.393952	2.24221	0.0331014	0.852959	0.463711	1.70447	0.181518	0.8182	0.694947	2.74986	0.040416	1.74908	0.138965	4.04047	0.000177942	0.885948	0.655229	-0.111037	0.988085	-0.566001	0.798909	0.734248	0.738963
WRKY33	AT2G38470	AT2G38470	-0.47593	0.867251	-0.282119	0.885441	0.84823	0.517893	-1.27581	0.357124	-1.83217	0.119307	1.43564	0.222092	-0.276029	0.924758	-0.666695	0.792016	0.273902	0.930613	-2.6702	0.0245694	1.34671	0.388613	-0.169473	0.9588	-2.07481	0.414248	-0.14153	0.962745	-0.363716	0.898007
AT1G03220	AT1G03220	AT1G03220	-1.06377	0.416116	0.754653	0.510892	3.74647	7.68e-07	-1.33927	0.147034	-0.579395	0.549201	3.76922	3.98e-07	1.3486	0.169307	0.795446	0.587103	1.03399	0.455638	-0.238074	0.867498	0.396614	0.788384	0.823135	0.562653	-0.0228583	1	0.193871	0.924518	-1.11838	0.458484
DYL1	AT1G28330	AT1G28330	2.43383	0.016122	1.98674	0.0429867	1.69375	0.0508538	2.60091	0.00311452	-0.861969	0.366424	3.49486	9.28e-06	0.782554	0.548088	0.320351	0.884167	1.01569	0.499661	-0.117826	0.95567	-0.486901	0.73905	0.909199	0.535225	-0.425215	0.903306	-0.419985	0.815353	0.606956	0.730984
PLDALPHA1	AT3G15730	AT3G15730	-0.164712	0.744162	-0.246877	0.456852	-0.687598	0.00338696	0.621947	0.0123399	0.606932	0.00901384	0.0974573	0.731708	0.530164	0.0441852	0.130452	0.812116	-0.358679	0.347118	0.488806	0.0565888	-0.00799832	0.992377	-0.0383436	0.95507	-0.213967	0.770865	-0.115468	0.819079	-0.17691	0.71799
PGK	AT1G79550	AT1G79550	0.0457144	0.943359	-0.0929763	0.784745	0.0390849	0.888642	-0.0132325	0.987966	0.192477	0.417651	0.503349	0.0134432	-0.172769	0.595313	-0.103191	0.835731	-0.142807	0.753292	-0.164181	0.565772	0.00720348	0.99216	-0.0982758	0.83252	-0.0342215	0.980064	-0.161479	0.693903	-0.0329174	0.954679
AT2G37870	AT2G37870	AT2G37870	-0.725202	0.744202	0.663526	0.646265	3.41937	0.000195269	5.79613	2.68e-10	5.16714	3.04e-09	5.19484	2.61e-09	0.307173	0.895922	0.370117	0.880452	0.262246	0.920585	0.316584	0.854436	0.250478	0.898446	-0.459687	0.833545	-0.740201	0.834581	0.193877	0.937836	-0.456532	0.841279
LTP	AT2G15050	AT2G15050	0.167594	0.923973	-1.16695	0.127475	-2.9384	1.01e-06	0.219923	0.828307	0.974494	0.137489	-3.33309	1.23e-08	-1.57604	0.0191967	-0.880664	0.356761	-0.523883	0.677124	-0.0815613	0.958342	-0.51369	0.597234	-0.657477	0.546535	-0.105884	0.97986	-0.150049	0.923855	-0.0246652	0.99145
AT2G44060	AT2G44060	AT2G44060	-0.110048	0.883171	-0.0828392	0.86749	-0.191687	0.578694	0.53912	0.0917988	1.48064	2.1e-08	-0.15491	0.646636	0.403762	0.276424	0.128762	0.855052	-0.0285214	0.97269	-0.0188558	0.995477	0.127303	0.812573	0.0584459	0.940776	-0.257558	0.772258	-0.15672	0.796344	-0.144702	0.825058
AT3G16780	AT3G16780	AT3G16780	0.522712	0.501755	-0.736051	0.201993	-0.564402	0.266824	-1.02016	0.0386837	-1.31812	0.00294215	0.0633461	0.916918	0.408928	0.553153	0.399569	0.64274	0.606503	0.433992	1.20415	0.0107381	0.675435	0.258026	0.555446	0.461749	0.697575	0.539839	-0.520712	0.522896	0.132449	0.908523
TSA1 AT1G52410	AT1G52410	AT1G52410	0.0426955	0.991811	0.698757	0.489253	-3.10233	2.8e-05	2.86625	4.03e-05	2.5566	0.000144473	0.12276	0.894166	2.74941	6.93e-05	1.8493	0.0290685	-0.100401	0.961006	5.1611	1.14e-15	4.27221	2.74e-10	2.5756	0.000874475	0.0444603	0.998214	1.72022	0.105432	0.60999	0.67323
PAL2	AT3G53260	AT3G53260	0.918109	0.374708	0.162153	0.888702	-1.18394	0.087237	-1.26969	0.083404	0.733805	0.31692	1.67811	0.00891255	0.176581	0.914419	-0.337111	0.830919	-0.938809	0.394093	-0.392226	0.688634	-0.498427	0.637802	-0.627743	0.600006	0.0440462	0.997472	0.350432	0.802345	-0.334501	0.822549
RCD1	AT1G32230	AT1G32230	0.157341	0.912173	0.129234	0.88519	0.631202	0.263487	0.309594	0.675297	-0.895094	0.0931821	0.926023	0.0735047	0.036755	0.992424	-0.412454	0.682545	0.108457	0.941788	-0.0167798	1	0.270959	0.765054	0.328894	0.753906	-0.339503	0.853173	-1.29369	0.0933566	-0.308588	0.782852
Hsp70-2	AT5G02490	AT5G02490	1.61794	0.0455251	0.188384	0.865736	0.523546	0.486133	-0.872741	0.268607	-3.30201	4.04e-08	0.494108	0.495459	-0.052503	0.988819	-0.247258	0.88265	0.185411	0.915482	-0.0808335	0.962678	-0.52199	0.607075	0.379047	0.781507	-0.822111	0.645673	-1.85247	0.0446157	-0.711199	0.573933
AT1G21065	AT1G21065	AT1G21065	0.454653	0.403146	0.244642	0.631851	0.578278	0.106011	0.828385	0.0219473	1.22983	0.000140526	0.302056	0.421083	0.61946	0.123074	0.173036	0.831527	0.182761	0.820567	0.369226	0.390072	0.22382	0.692596	0.241349	0.718522	0.0655081	0.976196	0.0669825	0.940213	-0.135291	0.867606
TET8	AT2G23810	AT2G23810	0.294003	0.890147	0.198856	0.887352	0.884156	0.322166	-0.468261	0.688919	-0.728103	0.429218	0.123289	0.907183	-0.48466	0.733696	-0.0754778	0.976083	0.180232	0.937301	-1.12383	0.23844	-0.44279	0.753869	-0.153993	0.945312	-1.29487	0.512832	-0.380216	0.825294	-1.12264	0.451855
CPN60B	AT1G55490	AT1G55490	0.275901	0.844663	-1.34452	0.0493107	-3.30296	4.89e-09	-1.02606	0.118424	-0.280395	0.702889	-1.99567	0.000345629	0.355338	0.729209	0.0116149	0.996646	-0.0951343	0.955991	0.311368	0.728442	-0.366173	0.709136	0.0540493	0.977008	0.850803	0.56138	0.544787	0.617129	0.662316	0.557684
AT4G01610	AT4G01610	AT4G01610	-0.451369	0.707353	0.922238	0.216185	1.58147	0.00625979	1.18833	0.0657362	0.070286	0.936571	1.25448	0.0301231	-0.965558	0.18292	-0.63762	0.531201	-0.276559	0.847052	-1.27004	0.0453495	-0.262126	0.810284	0.224566	0.871496	-1.19131	0.345013	-0.852735	0.393853	-0.970348	0.364935
ARF1A1C	AT2G47170	AT2G47170	-0.188346	0.693227	-0.174887	0.621451	0.0668957	0.828298	0.0371273	0.941151	0.301508	0.240905	-0.412754	0.0866138	0.39327	0.173503	0.217328	0.621368	0.142187	0.793556	0.29419	0.308877	0.400148	0.182555	0.166784	0.719616	0.0419002	0.977977	0.0544133	0.927457	-0.0771121	0.897764
COL4	AT5G24930	AT5G24930	-0.640986	0.0788762	-0.72461	0.0268727	-0.714351	0.012688	-0.189191	0.634021	0.520499	0.0751921	-0.755755	0.0064047	-0.518783	0.121334	-0.77123	0.0219345	-1.17639	0.000151283	-0.864261	0.0026952	-0.967358	0.00139251	-1.07632	0.000621558	-0.318334	0.68627	-0.353952	0.477275	-0.68097	0.144641
ZW9	AT1G58270	AT1G58270	-0.852249	0.365747	-0.577652	0.501856	-0.549836	0.459537	2.00181	0.00098553	3.17791	9.01e-09	3.15641	1.68e-08	1.41655	0.0317354	1.60671	0.0240014	0.726229	0.510315	0.984927	0.151445	1.13886	0.121969	1.86362	0.00932211	-0.128829	0.972078	1.52331	0.0906441	2.0317	0.0173588
CYTC-1	AT1G22840	AT1G22840	0.118496	0.872433	0.249322	0.547177	0.931929	0.000778675	-0.597231	0.0581605	-0.793867	0.00463668	0.704287	0.0116731	0.19384	0.694677	0.18134	0.770816	0.270918	0.627183	0.506547	0.115734	0.498825	0.165116	0.100349	0.886295	0.0908112	0.952538	-0.256449	0.637541	-0.329908	0.553429
CESA1	AT4G32410	AT4G32410	-0.223206	0.790333	-0.631099	0.181025	-1.1045	0.00323691	-0.0095485	1	0.643978	0.0989931	-1.05136	0.00412094	-0.00226843	1	0.148993	0.877339	-0.0512798	0.962479	0.183071	0.75982	0.0233321	0.982455	0.108066	0.910494	0.0114532	1	0.461678	0.483879	0.164826	0.852156
AT3G02200	AT3G02200	AT3G02200	0.233187	0.814972	-0.0043219	0.996154	-0.162379	0.764937	-0.388483	0.486934	-1.58458	9.17e-05	-0.312	0.518737	0.156884	0.864851	0.308329	0.725502	0.380879	0.653163	0.484625	0.364157	0.495014	0.406936	0.202563	0.83136	0.162535	0.935433	-0.163144	0.865527	0.0802338	0.94444
RRTF1	AT4G34410	AT4G34410	4.85842	0.0016419	1.36326	0.506791	2.75332	0.0909437	4.5059	0.00164554	3.50455	0.0131209	1.35372	0.446396	7.34746	2.2e-08	4.79027	0.00225989	5.33674	0.00223361	4.45242	0.00167881	4.36447	0.00469691	3.18857	0.126681	1.43094	0.728467	3.5899	0.0933566	2.47239	0.386152
ATCAD4	AT3G19450	AT3G19450	0.741575	0.146445	0.189486	0.756654	-0.575388	0.159219	-1.34798	0.000400884	-0.284239	0.52749	-3.35247	1.55e-20	-0.905311	0.029531	-0.974881	0.0338251	-0.924931	0.068885	-1.47397	7.6e-05	-1.21803	0.00303642	-0.940465	0.052396	-0.0547173	0.984267	-0.170231	0.838339	-0.604488	0.387775
AT2G01020 AT2G01020	AT2G01020	AT2G01020	2.7317	8.05e-09	3.22799	1.42e-12	3.39618	4.13e-14	1.38977	0.00601692	1.78495	0.000114642	3.09551	2.14e-12	2.31156	5.11e-07	2.57104	9.26e-08	2.48443	6.26e-07	1.82326	0.000144961	2.23607	4.75e-06	2.14286	2.68e-05	0.783723	0.512832	0.622673	0.466936	1.90238	0.00193496
AT5G60800	AT5G60800	AT5G60800	0.941847	0.558013	0.987301	0.424468	0.254479	0.827712	-3.09696	0.00120035	-5.74567	6.08e-11	-0.827962	0.402655	0.316673	0.872414	0.562174	0.773945	1.32946	0.361448	0.551452	0.677715	1.84278	0.0849877	0.364309	0.860316	0.237695	0.964808	-1.48729	0.324366	0.0971198	0.971978
AT5G15500	AT5G15500	AT5G15500	1.09597	0.685165	3.9332	0.00240295	3.89663	0.000644289	8.79615	8.06e-14	7.22753	3.6e-11	4.9419	6.77e-06	0.796623	0.740099	-0.50496	0.873736	0.642288	0.818568	0.356606	0.884916	0.149307	0.95787	1.18689	0.573279	-4.12712	0.293083	-2.42917	0.291183	-1.69921	0.459892
CP33	AT3G52380	AT3G52380	0.124596	0.925175	-0.823134	0.160071	-1.6278	0.000447472	-0.724592	0.182361	0.296746	0.601741	-1.055	0.0240696	0.0897802	0.944166	-0.19197	0.873105	0.0404589	0.977415	0.0707663	0.947602	-0.436252	0.534958	-0.324201	0.727874	0.395441	0.791138	-0.105289	0.929289	-0.136697	0.908255
AT2G21210	AT2G21210	AT2G21210	-0.48166	0.728467	-0.977569	0.256068	-0.0188122	0.984644	0.382747	0.691726	1.1356	0.0991624	-1.43117	0.0296193	-0.619619	0.531068	-0.536191	0.680434	-0.191759	0.914557	-0.530205	0.559101	-0.540808	0.601513	-0.485722	0.706771	-0.095943	0.984267	-0.451509	0.733846	-0.505598	0.711475
AT1G52342	AT1G52342	AT1G52342	2.3539	0.000626376	2.19686	0.00132134	2.24186	0.000273186	1.26995	0.0723681	1.78478	0.00429675	0.236243	0.762875	-0.472249	0.656185	-0.0628294	0.974554	0.800701	0.471772	-0.195372	0.86214	0.0975024	0.945458	1.37657	0.106382	0.211158	0.948403	-0.278917	0.843428	-0.763323	0.539039
CR88	AT2G04030	AT2G04030	-0.0633667	0.961931	-0.917528	0.0351847	-1.62819	7.59e-06	0.59498	0.17074	0.0627405	0.907472	0.129391	0.779525	0.35464	0.527437	0.434008	0.492952	0.317306	0.675928	0.831698	0.0387287	0.301506	0.609053	0.399209	0.542945	0.796077	0.312213	0.282299	0.705328	0.498576	0.480191
AT1G67700	AT1G67700	AT1G67700	-0.033609	0.98212	-0.794987	0.0309405	-1.32386	2.07e-05	-0.507054	0.166279	0.311759	0.387014	-1.78176	2.68e-09	-0.0137447	1	-0.717691	0.0741297	-0.507743	0.314966	-0.478379	0.196538	-1.00425	0.0035574	-0.699442	0.100718	0.323907	0.725853	0.202129	0.755364	0.384163	0.533437
GME	AT5G28840	AT5G28840	0.547065	0.0421939	0.0675165	0.856856	-0.299374	0.206913	-0.149802	0.622617	-0.494257	0.0235437	-0.994511	1.04e-06	-0.47395	0.0542987	-0.316096	0.337741	-0.232276	0.564293	-0.94072	8.47e-06	-0.64756	0.00643148	-0.192418	0.637059	-0.102456	0.90763	-0.11491	0.80304	-0.13638	0.773202
AT1G34030	AT1G34030	AT1G34030	0.175153	0.835779	-0.23966	0.656289	-0.442985	0.259428	-0.50407	0.229915	-0.751119	0.0360826	-0.534122	0.146543	0.162805	0.812769	0.000739212	1	0.130082	0.885866	0.538482	0.191593	0.137074	0.841902	-0.015945	0.989184	0.576047	0.507191	-0.0168484	0.986549	0.274839	0.706759
AT3G20820	AT3G20820	AT3G20820	-0.0416036	0.991811	0.278007	0.809987	-2.18052	0.00148753	0.324062	0.762558	1.9134	0.00510131	-1.18871	0.0946416	-1.56247	0.0448695	-0.680854	0.592312	-1.02334	0.371723	-0.29339	0.801192	-0.322584	0.802277	-0.616404	0.636664	-0.289228	0.925716	0.149812	0.932726	-0.291863	0.859809
RALF23	AT3G16570	AT3G16570	0.660286	0.323195	0.302827	0.650416	0.20587	0.706786	0.576395	0.276439	1.258	0.00343341	0.29741	0.553408	-0.596949	0.303459	0.175673	0.877339	0.313989	0.740487	-0.28243	0.659141	-0.0259991	0.983471	-0.34689	0.684387	-0.204643	0.909498	0.193566	0.842355	0.109377	0.923249
THX	AT1G50320	AT1G50320	0.131683	0.786977	-0.211761	0.4943	-0.276967	0.253455	-0.39153	0.110807	0.128209	0.630938	-0.903812	1.28e-05	0.170476	0.626337	-0.0935846	0.864242	-0.0718248	0.900174	-0.239085	0.384079	-0.163813	0.638972	-0.23105	0.547701	0.158032	0.832288	-0.08514	0.862558	-0.160625	0.724391
eIF6A	AT3G55620	AT3G55620	0.0562608	0.977907	-0.676322	0.246521	0.136136	0.816575	-0.318597	0.612719	-1.20833	0.00649826	0.243943	0.645967	0.00471996	1	-0.503649	0.514828	-0.216312	0.845591	0.46527	0.422829	0.0681948	0.945914	-0.0421711	0.977008	0.149936	0.948403	-1.10436	0.103621	-0.0528679	0.969091
AT4G33666	AT4G33666	AT4G33666	0.532238	0.727306	1.34088	0.134775	0.771261	0.345218	-0.76355	0.407113	1.13385	0.141022	-2.91002	2.6e-05	-2.15907	0.00432031	-2.27433	0.00649933	-1.50335	0.149236	-0.44434	0.679148	-0.782655	0.458417	-1.71726	0.0684631	0.103097	0.984269	-0.479233	0.746842	-1.79932	0.126379
AT1G43910	AT1G43910	AT1G43910	1.59857	0.0532563	0.820145	0.317671	1.61423	0.00860975	-1.93959	0.0149418	-6.58568	1.35e-28	-0.361404	0.614784	-1.52661	0.0734381	-0.680282	0.523712	0.192845	0.905869	-1.98442	0.0104053	-3.85e-05	1	0.164145	0.918829	-0.974906	0.598819	-1.62692	0.0754304	-0.0990483	0.954164
PORB	AT4G27440	AT4G27440	-0.804046	0.525773	-1.06147	0.261086	-4.63349	6.28e-11	-1.64749	0.0364801	-2.32336	0.000947716	-2.91225	2.19e-05	0.350526	0.798418	-0.722107	0.581535	-0.0258851	0.992105	1.90922	0.0115787	-0.410809	0.744862	-0.220073	0.903353	0.567915	0.814268	0.356695	0.817449	0.330916	0.844312
AT4G15545	AT4G15545	AT4G15545	-0.00425899	1	0.127085	0.781863	-0.479056	0.10655	-0.267061	0.459377	0.156994	0.649135	-0.921308	0.000630945	-0.300688	0.452587	-0.322374	0.496809	-0.20043	0.739904	-0.926372	0.00101297	-0.646193	0.0471222	-0.357156	0.437813	-0.13556	0.904067	-0.140233	0.813227	-0.252368	0.66255
AT2G26690	AT2G26690	AT2G26690	-0.495205	0.499023	-0.083037	0.914369	0.243041	0.639652	-0.252774	0.683974	0.968385	0.0241397	-0.188157	0.713063	-0.962379	0.043867	-1.02371	0.0540719	-1.21222	0.0244225	-0.508374	0.337299	-0.230772	0.760989	-0.525887	0.458504	-0.866553	0.343125	-0.307799	0.720549	-0.765119	0.323931
PSRP2	AT3G52150	AT3G52150	-0.119003	0.925733	-1.02025	0.0557001	-1.92973	9.71e-06	-1.17079	0.0139455	-0.306985	0.571383	-1.96069	4.16e-06	0.0489212	0.977182	-0.500261	0.519485	-0.587244	0.448381	-0.146738	0.850946	-0.672141	0.25912	-0.596759	0.412806	0.597525	0.614595	0.452792	0.585454	0.322962	0.731888
WRKY40	AT1G80840	AT1G80840	2.02846	0.238876	1.00993	0.563387	1.83056	0.152833	1.27539	0.398463	0.298419	0.858116	-0.625147	0.66058	3.88998	0.00136671	2.21285	0.177837	1.84624	0.337214	1.51482	0.300891	1.41629	0.400593	0.461239	0.871921	-0.808036	0.848969	1.18917	0.59169	0.499452	0.861262
cICDH	AT1G65930	AT1G65930	0.355081	0.296939	-0.0872036	0.821152	-0.0482876	0.874972	-1.67655	3.7e-15	-1.49626	1.22e-12	-0.967482	7.25e-06	-0.59525	0.015696	-0.979625	4.55e-05	-0.511918	0.105787	-1.10127	5.17e-07	-0.959392	4.26e-05	-0.948876	0.000124958	-0.413339	0.43352	-0.5909	0.0844848	-0.709302	0.0363642
TLP2	AT2G18280	AT2G18280	-0.0880082	0.943359	-0.0496758	0.944499	-0.566258	0.172819	0.120387	0.853038	-2.32645	6.04e-11	-1.17827	0.00154481	-0.428402	0.452559	0.396358	0.562037	-0.202817	0.825117	-0.842115	0.0510117	-0.372667	0.515181	-0.0231514	0.985702	-0.0166432	1	0.581837	0.373252	0.353462	0.652183
AT2G19740	AT2G19740	AT2G19740	0.256268	0.716261	0.111596	0.847721	-0.0954598	0.830488	-0.17168	0.740722	-1.06785	0.001172	-0.705332	0.0387452	0.0946195	0.910646	0.169972	0.834285	0.291815	0.670719	0.52211	0.186789	0.259786	0.631208	0.0815802	0.926998	0.423297	0.646381	-0.0719926	0.933743	0.224075	0.758548
AT2G04400	AT2G04400	AT2G04400	-0.57041	0.456753	0.0676535	0.935059	0.219727	0.697944	-0.185614	0.798196	-0.323689	0.553433	0.737555	0.11387	1.70496	0.000141345	0.773075	0.230473	0.170231	0.883862	2.97753	1.28e-12	1.82093	9.17e-05	1.60986	0.00153891	-0.102415	0.970048	0.114635	0.920718	0.0244045	0.987996
FLA7	AT2G04780	AT2G04780	-0.335337	0.897509	-0.590948	0.69278	-1.75743	0.0861321	-1.69328	0.120793	0.591761	0.615309	-3.51136	0.00024585	0.573915	0.738619	0.461941	0.844779	-0.186903	0.947438	0.387968	0.810884	0.467133	0.791199	0.450809	0.834438	0.640755	0.852111	1.50423	0.358893	1.0014	0.600784
AT4G10450	AT4G10450	AT4G10450	-0.193107	0.894008	-0.853681	0.218363	-1.30751	0.0186158	-1.07829	0.0743557	-1.86371	0.000350352	-0.539602	0.364672	-0.0728591	0.96501	0.1513	0.922554	0.124788	0.935763	0.752151	0.245466	0.12798	0.910298	0.154121	0.912393	0.766313	0.587917	-0.201045	0.872864	0.552348	0.610923
PPa1	AT1G01050	AT1G01050	0.271103	0.549609	-0.164475	0.673812	0.0419781	0.90372	-0.302382	0.336631	-0.912284	0.000174423	-0.561691	0.0269697	-0.549265	0.0583303	-0.262644	0.561944	0.0156633	0.985445	-0.907909	0.000372694	-0.393463	0.236797	-0.176911	0.726558	-0.227859	0.774798	0.0513676	0.938084	-0.192433	0.715519
FBA6	AT2G36460	AT2G36460	0.248245	0.63716	-0.0833743	0.858655	-0.217857	0.49457	0.479903	0.120994	-0.852876	0.00118406	0.591274	0.0278807	-0.456804	0.176605	-0.376399	0.368963	-0.153805	0.808124	0.0748995	0.880908	-0.212637	0.620236	-0.294903	0.532207	-0.4648	0.487032	-0.5418	0.208446	-0.00937693	0.991931
AT5G48760	AT5G48760	AT5G48760	0.190082	0.855532	-0.698814	0.183649	-1.25628	0.00242536	-0.384284	0.48114	-0.957114	0.022397	-0.353042	0.446756	-0.266232	0.717471	0.0946286	0.940486	-0.0666708	0.957478	0.564263	0.260831	0.0360871	0.972265	-0.203074	0.827179	0.283818	0.847596	0.0250273	0.983038	0.295965	0.736254
sks5	AT1G76160	AT1G76160	-0.322301	0.84981	-1.14778	0.192214	-2.05326	0.00313202	-2.3434	0.000912245	-1.07124	0.145574	-2.41811	0.000309504	1.27247	0.120081	0.659764	0.60622	0.412209	0.796442	0.730753	0.409536	0.693471	0.497934	0.40889	0.780761	0.388155	0.882789	1.05489	0.371586	0.782364	0.562722
UGD2	AT3G29360	AT3G29360	-0.452344	0.491635	-0.611861	0.215349	-0.366108	0.407688	-0.722726	0.0943504	-0.152458	0.761316	-0.659755	0.0948261	0.903992	0.0332382	0.5693	0.326103	0.233209	0.79228	0.953776	0.0185478	0.72	0.128828	0.539872	0.374884	-0.000409679	1	0.396024	0.576402	0.242443	0.772056
AT4G08570	AT4G08570	AT4G08570	2.26861	0.531346	3.27007	0.188153	5.42431	0.00409967	11.6745	1.01e-11	12.6526	2.46e-14	11.5461	3.43e-12	2.66061	0.310827	2.69596	0.377529	3.31962	0.312017	2.67454	0.248969	2.74718	0.289848	4.38921	0.0872673	-0.634427	0.964413	-0.339761	0.95777	0	1
AT1G19450	AT1G19450	AT1G19450	-0.210613	0.890179	-1.16094	0.0979806	-0.733384	0.250579	-2.62956	3.1e-06	-1.22596	0.0361374	-3.23707	4.57e-09	-0.427731	0.652352	-0.687669	0.474952	-0.155123	0.921676	0.0779014	0.956242	-0.118781	0.922467	0.074006	0.966651	-0.425693	0.828296	-0.404791	0.727905	-0.414122	0.73213
OEP16-1	AT2G28900	AT2G28900	0.670871	0.460187	-0.351899	0.675467	-0.976059	0.0901355	0.203274	0.817834	0.327096	0.622452	1.0734	0.0482368	1.71807	0.00201132	0.364169	0.755232	0.519352	0.623642	3.42404	9.38e-12	1.23752	0.0502721	1.35593	0.0474064	0.15239	0.962784	0.269783	0.815648	0.397006	0.725074
PK1	AT3G08730	AT3G08730	0.726977	0.082681	-0.0620991	0.914852	0.706731	0.0324904	-0.0846271	0.878856	-1.27084	3.25e-05	0.147259	0.703991	-0.163259	0.78691	0.270651	0.665606	0.225125	0.750675	-0.24836	0.583816	0.0442765	0.951999	0.467928	0.355307	-0.0286062	0.993249	0.351301	0.548259	0.0726645	0.933331
AT4G27700	AT4G27700	AT4G27700	-0.565236	0.230005	-0.622945	0.126229	-1.25273	0.000105656	-0.00257839	1	0.84499	0.00932876	-0.831435	0.010555	0.0873827	0.915491	-0.336512	0.570215	-0.382019	0.522743	0.167039	0.747264	-0.277851	0.586607	-0.452484	0.392931	0.562091	0.475519	0.138623	0.850251	-0.0132292	0.99145
AT2G38240	AT2G38240	AT2G38240	0.190416	0.979503	2.12858	0.386677	-0.500557	0.773297	-0.137524	0.978399	1.87041	0.346815	-1.90103	0.191924	8.73792	7.02e-11	6.18393	0.000630025	-0.835688	0.788863	9.34168	3.31e-12	8.60932	1.99e-07	1.49205	0.522188	-1.547	0.784779	5.92062	0.00775921	-1.6564	0.536433
AT2G04390	AT2G04390	AT2G04390	0.188012	0.743651	-0.0702337	0.881355	-0.389346	0.184295	-0.51542	0.0866492	-0.530409	0.0543223	-0.43749	0.115856	0.330514	0.367237	0.425677	0.278199	0.221944	0.68713	0.473466	0.117952	0.390239	0.274799	0.16958	0.761254	0.396226	0.55882	-0.0447646	0.951823	0.176206	0.760875
AT3G28900	AT3G28900	AT3G28900	0.882115	0.262764	-0.44498	0.574325	-0.928003	0.104647	-0.826673	0.190192	-1.02874	0.0644543	-0.677167	0.237164	0.540625	0.494338	0.561948	0.557879	0.679404	0.468686	1.11023	0.0589278	0.700731	0.343872	0.461318	0.651792	0.688209	0.632672	-0.0348501	0.981155	0.385568	0.732955
AT5G61820	AT5G61820	AT5G61820	0.655021	0.581649	0.137108	0.905743	1.03026	0.136543	1.96864	0.00343461	1.48975	0.0227404	1.4991	0.0195369	-1.00828	0.222084	-1.07812	0.250396	-0.625134	0.623007	-0.583612	0.505771	-1.09386	0.190199	-0.297747	0.839694	-1.55208	0.21106	-0.85212	0.454883	-1.57662	0.140274
AT4G37830	AT4G37830	AT4G37830	0.572668	0.0108671	0.434468	0.0562598	0.576351	0.00240236	0.312314	0.160356	0.28319	0.168591	0.337643	0.085597	0.54234	0.00748826	0.346917	0.194193	0.360518	0.20764	0.17854	0.486175	0.402231	0.0801661	0.257913	0.407245	-0.077557	0.928602	-0.260165	0.440132	-0.209888	0.582169
MGP1	AT2G21870	AT2G21870	0.203786	0.538679	-0.00862358	0.982716	0.279283	0.16855	0.0212449	0.965241	0.127897	0.571383	0.669827	0.000166525	0.445807	0.0313264	0.242312	0.41753	0.205098	0.55477	0.39472	0.0524072	0.404962	0.0676036	0.136267	0.712693	0.0141435	0.996126	-0.217661	0.520993	-0.0999889	0.813541
KCS3	AT1G07720	AT1G07720	0.326064	0.736604	-0.271737	0.706488	0.237113	0.677487	0.765847	0.143847	1.7766	4.28e-05	1.03563	0.0229301	-1.45186	0.0020895	-0.681696	0.326157	-0.192146	0.868832	-0.890373	0.0790092	-1.22667	0.0178064	-1.21135	0.0379548	-0.675998	0.560333	-1.25131	0.0628694	-0.618819	0.480191
EXO70H7	AT5G59730	AT5G59730	-0.182864	0.903113	-0.641295	0.398736	-0.411173	0.530068	0.223076	0.796708	1.10901	0.0470455	-0.546385	0.366353	2.34825	8.01e-06	1.28366	0.0604305	0.091982	0.955574	-0.290229	0.732945	0.195216	0.857061	-0.17901	0.895827	-0.625017	0.679833	0.786755	0.402115	-0.0705116	0.965505
PSAT	AT4G35630	AT4G35630	-0.222628	0.874288	0.0136904	0.990546	0.27076	0.679781	-0.0369022	0.985628	-1.10568	0.0421826	0.329895	0.590012	1.70496	0.00188591	0.76112	0.348199	-0.0299867	0.986816	3.7453	2.3e-14	2.24634	3.33e-05	1.74738	0.00411472	0.0983413	0.977236	0.368062	0.730629	-0.351222	0.759005
MSRB2	AT4G21860	AT4G21860	0.0103353	0.997972	-0.393147	0.27973	-0.555365	0.0540821	-0.0678867	0.887267	0.338696	0.263435	-0.853254	0.00147172	-0.147028	0.772466	-0.28687	0.560186	-0.461852	0.284425	-0.491179	0.114046	-0.40005	0.27768	-0.5715	0.13311	0.161071	0.874853	0.219812	0.686141	0.0324125	0.969091
AT5G13780	AT5G13780	AT5G13780	0.162219	0.843538	-0.0995221	0.863908	0.0123875	0.9802	-0.327605	0.45265	-1.43908	5.75e-06	0.0621316	0.888842	-0.141876	0.83554	0.085627	0.930428	0.122241	0.888162	0.148192	0.792948	0.05326	0.943026	0.111186	0.893661	0.258308	0.822822	0.00881544	0.992389	0.168183	0.827431
FIB4	AT3G23400	AT3G23400	-0.379625	0.635002	-0.751792	0.148703	-0.756858	0.0844932	0.027294	0.987184	0.850766	0.0451642	-0.31808	0.499298	0.280676	0.696143	-0.254008	0.787009	-0.596491	0.393318	0.143583	0.842288	-0.102816	0.906273	-0.588676	0.373853	0.17878	0.920137	-0.147621	0.881468	-0.597668	0.444766
GDC1	AT1G50900	AT1G50900	0.133823	0.912173	-0.47869	0.431998	-1.52927	0.000384128	-0.420081	0.455273	0.621275	0.185399	-2.04899	7.37e-07	0.193532	0.821856	-0.286294	0.763875	-0.0127591	0.993999	-0.067041	0.946672	-0.382324	0.568614	-0.199666	0.839973	0.37568	0.785506	0.0561297	0.962541	0.108369	0.923374
AT3G62650	AT3G62650	AT3G62650	0.292285	0.824964	1.91528	0.00129821	1.22963	0.0295115	1.77301	0.001877	0.673382	0.270355	1.09917	0.0485771	0.177235	0.891316	0.582591	0.554855	0.449215	0.69384	0.573265	0.424769	0.431072	0.626032	0.642033	0.496985	-0.584518	0.718032	0.0582467	0.970044	-0.254335	0.844946
AMT1-1	AT4G13510	AT4G13510	0.414327	0.718987	-0.0355635	0.974676	-0.0891551	0.905834	-0.958896	0.128775	-1.66715	0.00201302	-0.676087	0.249645	-0.496086	0.558912	-0.380906	0.747791	0.192872	0.892888	-1.61683	0.00466027	-0.202544	0.851553	-0.135319	0.92564	-0.982465	0.454582	-1.49399	0.0647054	-1.1559	0.228858
TSPO	AT2G47770	AT2G47770	1.33465	0.654731	3.50271	0.027009	4.85166	0.000209819	7.60716	4.78e-08	8.2584	4.62e-11	8.15551	4.09e-11	0.546475	0.87331	0.0208734	0.998406	0.897251	0.773856	-1.05493	0.670559	0.606031	0.82013	0.220113	0.957662	-2.57279	0.636892	-0.525798	0.882745	-1.03282	0.749234
GPRI1	AT2G20570	AT2G20570	-0.549411	0.324173	-0.224157	0.695314	-0.441101	0.283895	0.228176	0.663635	1.19847	0.00069748	-0.642541	0.0884439	-0.869356	0.0316159	-0.116345	0.909786	-0.357497	0.61789	-0.0785046	0.912742	0.0547937	0.946922	-0.163553	0.845823	-0.917101	0.165738	-0.554213	0.380437	-0.458096	0.51802
AT2G42690	AT2G42690	AT2G42690	-0.496421	0.540364	-0.226622	0.762219	-1.48243	0.00110469	-0.924465	0.0692305	0.252952	0.657123	-2.29993	1.12e-07	-1.39349	0.00340591	-1.0332	0.0774428	-1.03923	0.102902	-1.41701	0.00246063	-1.42849	0.00442557	-1.37915	0.0121623	-0.301365	0.855206	-0.415742	0.635861	-0.692649	0.422399
petL	ATCG00590	ATCG00590	2.45491	0.00043669	1.68478	0.0242238	1.10381	0.107517	2.10196	0.00158182	2.84821	3.15e-06	0.124664	0.884101	3.1033	5.01e-07	2.50475	0.000320894	1.48487	0.0953444	2.56134	6.14e-05	1.55545	0.0385985	1.34114	0.131199	0.167863	0.96575	0.119476	0.94633	-0.575241	0.671116
AT5G05750	AT5G05750	AT5G05750	-0.375738	0.672196	0.550539	0.323978	0.481027	0.305774	0.527045	0.32113	-2.70931	2.86e-12	0.314445	0.507744	-0.108088	0.925694	0.217179	0.82706	0.0976121	0.934597	-0.676256	0.188237	-0.0135588	0.992982	0.227558	0.805416	-0.204917	0.909498	0.461835	0.543121	0.00554483	0.997764
AT4G17560	AT4G17560	AT4G17560	0.0519046	0.981977	-0.927268	0.11662	-2.19822	2.28e-06	-0.849444	0.119564	-0.00636361	1	-2.37657	1.55e-07	0.1807	0.861313	-0.129499	0.926058	-0.387584	0.696483	-0.0997129	0.916676	-0.516928	0.45849	-0.357663	0.703611	0.633434	0.61948	0.631952	0.452462	0.350366	0.726771
PPI1	AT4G27500	AT4G27500	0.630887	0.0117345	0.447999	0.0737459	-0.114582	0.659367	0.228496	0.39677	-0.509502	0.0153801	0.224355	0.324463	1.86268	8.92e-23	0.962513	6.81e-06	0.489535	0.0851983	1.75314	3.94e-20	0.895725	2.46e-05	0.821071	0.000320959	-0.138934	0.859486	0.134193	0.755301	-0.0333419	0.954679
AT1G74060	AT1G74060	AT1G74060	0.0360414	0.980399	-0.182153	0.707496	-0.741878	0.0186338	-0.423065	0.254002	-0.630885	0.0453347	-0.542913	0.0862041	-0.0672399	0.93734	0.0763618	0.933769	0.0682257	0.939218	0.26299	0.531147	0.0257948	0.973153	0.0475051	0.958351	0.445383	0.576944	-0.0200982	0.981032	0.442865	0.444294
AT3G54500	AT3G54500	AT3G54500	1.0006	0.0033078	0.530875	0.160142	0.575726	0.0685827	-0.0562906	0.924349	0.261874	0.456635	-0.329308	0.318806	0.0559114	0.946649	0.252999	0.668654	-0.300535	0.610574	-0.797622	0.0120517	-0.450405	0.262955	-0.648669	0.116791	-0.0370929	0.984553	-0.24041	0.688578	-0.637372	0.230803
AT3G56880	AT3G56880	AT3G56880	0.41506	0.74718	0.00950588	0.994816	0.0333416	0.970531	0.414078	0.623645	1.62835	0.00602631	-0.0917052	0.909153	0.442772	0.658775	0.566283	0.613625	1.59987	0.0399001	0.196427	0.851145	0.247682	0.831003	0.310782	0.816469	-0.189932	0.953561	-0.498005	0.671815	0.605993	0.617804
PMEAMT	AT1G48600	AT1G48600	-0.0468086	0.98629	-0.901223	0.216815	-1.05767	0.0768634	0.622614	0.383297	0.978771	0.0998092	-1.77094	0.00135179	0.402367	0.677138	0.139313	0.934222	-0.415606	0.734223	0.425057	0.595293	-0.408266	0.659896	-0.262507	0.83865	0.20812	0.939429	0.473284	0.668824	0.243423	0.857739
AT4G02920	AT4G02920	AT4G02920	-0.219765	0.729752	-0.589463	0.111437	-0.286829	0.411856	-0.484277	0.166099	-0.21407	0.554892	-0.454413	0.150751	-0.946157	0.00233824	-0.807437	0.0255768	-0.544024	0.238134	-0.84529	0.00698068	-0.931063	0.00477108	-0.823081	0.0292677	-0.0434333	0.984267	-0.163808	0.798275	-0.379931	0.515605
AT5G24165	AT5G24165	AT5G24165	1.31601	0.0043074	0.682205	0.18423	0.360761	0.443465	0.415988	0.423998	0.61761	0.15447	-0.517719	0.230571	0.137356	0.880984	0.122647	0.916028	0.120601	0.911614	-0.464578	0.364221	-0.450475	0.441929	-0.106884	0.920268	-0.00839314	1	0.0544623	0.961771	-0.267281	0.760225
BASS2	AT2G26900	AT2G26900	-0.455425	0.451465	-0.451938	0.361743	-1.57625	8.37e-06	0.569648	0.177486	0.923499	0.0103474	-0.623334	0.0951712	0.650637	0.134165	0.622505	0.226937	0.49809	0.416883	0.841971	0.0299777	0.516754	0.289242	0.610538	0.254236	0.349143	0.749203	0.56102	0.365746	0.416113	0.557696
AT1G51650	AT1G51650	AT1G51650	0.738215	0.00452529	0.558795	0.0352226	0.646662	0.00433582	0.111003	0.753565	-0.0156622	0.967365	0.497393	0.028661	0.777179	0.000778264	0.473721	0.114069	0.311792	0.420726	0.621137	0.00927203	0.622468	0.0149573	0.181619	0.682038	0.132566	0.87814	-0.0371992	0.95363	-0.0408817	0.947424
AT3G52230	AT3G52230	AT3G52230	0.315055	0.43297	0.406759	0.194007	0.358857	0.180598	0.558548	0.0351103	1.49446	3.05e-11	0.663852	0.00576759	0.150184	0.730017	-0.0416043	0.957323	-0.0250356	0.972294	-0.434647	0.11669	-0.181013	0.650664	-0.315995	0.440317	-0.154181	0.860934	-0.191773	0.697007	-0.313047	0.513746
TRIP-1	AT2G46280	AT2G46280	0.235706	0.76943	0.128208	0.836088	-0.11456	0.809742	-0.190076	0.730607	-1.08328	0.00227045	0.169347	0.698027	0.0418099	0.975157	0.181903	0.834635	0.286737	0.705144	0.394872	0.393841	0.0683778	0.930346	0.187916	0.815867	0.183609	0.900487	-0.219765	0.770096	0.20243	0.802939
CH1	AT1G44446	AT1G44446	-0.672631	0.0292052	-0.608888	0.0409982	-1.44336	4.68e-09	-0.946415	0.000186099	-0.0652983	0.853059	-1.49968	3.5e-10	-1.27814	1e-07	-0.894897	0.00133081	-1.03322	0.000261089	-0.64336	0.0153983	-0.844761	0.00198255	-1.19769	9.28e-06	0.169287	0.850277	0.213947	0.663513	-0.327012	0.503363
GASA4	AT5G15230	AT5G15230	0.941223	0.640642	1.68651	0.206549	-3.55737	0.000558557	-2.21969	0.0545311	-1.02882	0.389956	-5.69532	1.63e-08	0.537353	0.781935	0.394914	0.885341	0.252976	0.93182	0.474256	0.784159	0.742426	0.664916	0.122119	0.970716	-0.215156	0.973967	2.02388	0.228246	1.09583	0.597661
AT2G14910	AT2G14910	AT2G14910	0.116808	0.900188	-0.0596403	0.923688	-0.222811	0.586906	0.104955	0.853138	-0.322712	0.411381	-1.07429	0.0011421	0.00943441	1	0.09981	0.919608	-0.00608314	0.996131	-0.572234	0.146212	-0.051919	0.945914	0.150505	0.847312	-0.246203	0.834692	0.28224	0.671531	0.26715	0.705508
LTL1	AT3G04290	AT3G04290	0.184842	0.984555	0.997146	0.75844	-3.86361	0.102328	-3.03878	0.196662	-2.19844	0.329648	-4.16251	0.0644959	0.683646	0.878577	1.64029	0.678131	-0.154401	0.98044	-0.490797	0.895809	2.21672	0.440845	1.42968	0.718461	1.40677	0.840334	3.09989	0.365562	4.34783	0.20617
AT3G22910	AT3G22910	AT3G22910	0.994587	0.629371	-0.0234423	0.991859	0.456785	0.724515	-0.713045	0.649454	-3.12074	0.00285109	-0.354335	0.783152	1.30332	0.376907	-0.0193307	0.997133	-0.518735	0.838839	1.65254	0.184443	3.23539	0.00435394	0.590629	0.792381	-0.4845	0.916509	-1.21063	0.523093	-2.68533	0.110284
CLPP5	AT1G02560	AT1G02560	-0.505144	0.190746	-0.398719	0.270612	0.393909	0.18641	-0.178099	0.650131	0.10757	0.765545	0.132887	0.685997	-0.094605	0.877531	-0.401882	0.33873	-0.230956	0.680669	-0.319965	0.35332	-0.357634	0.347183	-0.250842	0.624772	0.0830146	0.958691	-0.112796	0.855588	-0.110556	0.866292
AT5G04800	AT5G04800	AT5G04800	0.468822	0.479563	-0.211014	0.733273	-0.428201	0.334023	-0.418228	0.398415	-0.991917	0.0106332	0.106408	0.829768	0.393221	0.493589	0.52047	0.396685	0.539552	0.413651	0.826689	0.0512494	0.469913	0.390151	0.282567	0.714134	0.562684	0.576963	-0.101379	0.917874	0.236789	0.78263
GSTU13	AT1G27130	AT1G27130	-0.201418	0.815328	-0.681498	0.142325	-2.34162	7.54e-10	-0.0132113	1	0.9357	0.0107349	0.171988	0.700365	1.55217	1.31e-05	0.694766	0.169688	-0.020674	0.987313	0.481656	0.281739	0.182884	0.787753	-0.49183	0.421304	0.244944	0.852111	0.45168	0.493362	0.286187	0.711475
AGC2-1	AT3G25250	AT3G25250	0.0585241	NA	-1.37435	NA	0.373648	NA	0.167372	NA	-3.97477	NA	1.90401	NA	2.46388	NA	-0.562809	NA	0.358741	NA	0.663264	NA	4.84904	NA	0.631706	NA	-2.3362	NA	-0.718117	NA	-0.553331	NA
Tudor2	AT5G61780	AT5G61780	0.12147	0.922443	-0.275962	0.684805	-0.202663	0.710866	-0.110515	0.883366	0.325378	0.529537	0.138155	0.797999	3.04928	9.7e-15	1.48228	0.00190528	0.226784	0.828925	2.56124	2.21e-10	1.69679	0.000153596	1.31881	0.00990142	0.227031	0.894766	0.666891	0.369276	0.23056	0.813916
AT5G18600	AT5G18600	AT5G18600	-1.22561	0.189412	-0.961266	0.275279	0.5844	0.452001	-2.55167	0.000135773	-0.125755	0.896079	-2.09269	0.00143163	-0.272447	0.841617	-0.886663	0.404172	-0.074065	0.970104	-0.796103	0.337838	-0.99913	0.261014	-1.61164	0.0651154	-0.859469	0.62797	-0.41816	0.762796	-0.719234	0.589156
HTB4	AT5G59910	AT5G59910	0.376168	0.474127	0.255619	0.577345	0.381895	0.268041	0.166721	0.721903	0.407988	0.228917	0.898225	0.00279029	0.897214	0.00592234	0.227761	0.724383	0.0233267	0.980769	1.07862	0.00053476	0.602763	0.113241	0.247749	0.680229	0.472254	0.544982	0.0712364	0.927763	-0.115278	0.879942
AT5G13430	AT5G13430	AT5G13430	-0.430579	0.190524	-0.735686	0.00426253	-0.356519	0.160565	-0.931423	6.78e-05	-1.28128	3.14e-09	-0.0229436	0.944	-0.343737	0.253444	-0.433182	0.175773	-0.301753	0.458502	-0.230549	0.451102	-0.299423	0.351539	-0.503416	0.113103	0.000728035	1	-0.298679	0.466821	-0.0412126	0.948683
AT5G14910	AT5G14910	AT5G14910	0.745359	0.14557	0.176649	0.77566	-0.741156	0.0605161	-0.252043	0.637037	0.243742	0.596143	-1.13674	0.00198618	0.85972	0.0414845	0.462023	0.459687	0.450507	0.506403	0.56132	0.207065	0.272317	0.658722	0.354554	0.607739	0.514601	0.604598	0.357002	0.61554	0.195771	0.819201
SSI2	AT2G43710	AT2G43710	0.265414	0.604939	-0.682771	0.0333663	-0.520697	0.0731647	0.0457118	0.936455	0.438564	0.132372	-0.522094	0.0632259	-0.442353	0.198221	-0.155864	0.808433	-0.294667	0.568547	-0.438155	0.170643	-0.4342	0.229316	-0.246162	0.636344	-0.0290041	0.988592	0.0578328	0.935381	0.0401685	0.958931
AOX1D	AT1G32350	AT1G32350	0.44493	0.939936	3.39018	0.0846234	3.37293	0.0431939	1.20319	0.639151	-2.78491	0.120565	2.55723	0.126901	-0.308156	0.956934	-0.36836	0.941729	-0.412032	0.927827	-0.823969	0.801974	5.30374	0.0026689	0.493887	0.903944	-3.32064	0.560747	-3.86909	0.172257	-2.22973	0.46782
AT5G47550	AT5G47550	AT5G47550	1.00501	0.241657	0.78828	0.32795	1.62337	0.00674472	2.63317	5.95e-06	4.29848	1.74e-15	3.06431	2.95e-08	-0.635482	0.460808	-0.308441	0.832239	0.316153	0.828865	-0.294195	0.757442	-0.434923	0.658813	0.70412	0.492822	-0.292034	0.90355	-0.679229	0.541945	-0.270096	0.852155
AT5G15780	AT5G15780	AT5G15780	0.00129781	1	0.22643	0.933251	-3.3426	0.0408989	-2.41841	0.155229	0.376177	0.854666	-2.76559	0.0764417	0.0138751	1	-0.151741	0.973862	-0.449533	0.910781	-0.425837	0.871953	0.309768	0.921401	0.54508	0.880535	0.599763	0.927144	1.01697	0.732151	1.58026	0.589156
UCP5	AT2G22500	AT2G22500	0.61907	0.734367	-0.180827	0.906528	1.50925	0.096041	0.0490709	0.990617	-0.921275	0.34335	0.0191284	0.990693	2.41318	0.00813164	0.924614	0.544152	1.77749	0.150199	1.08289	0.307686	0.755166	0.568626	0.576786	0.741307	-1.28315	0.558079	-0.0374446	0.987056	0.22645	0.918727
BAG1	AT5G52060	AT5G52060	0.506674	0.539448	-0.0579029	0.947934	0.0577915	0.930721	0.171681	0.821992	1.2291	0.00800505	-0.619079	0.218489	0.693714	0.246526	0.300749	0.769513	0.560327	0.508216	1.18096	0.0165753	0.718108	0.245138	1.09142	0.0751075	-0.0520312	0.987536	0.178792	0.867768	0.359523	0.713366
AT5G27120	AT5G27120	AT5G27120	-0.501975	0.774988	-0.664637	0.562568	-1.73764	0.0364235	-0.836836	0.40283	-2.76501	0.000257687	0.412102	0.658841	-0.356861	0.817559	0.177704	0.940687	0.197053	0.929271	1.17812	0.202709	0.506801	0.700913	0.299086	0.875398	0.944616	0.657858	-0.740133	0.616623	0.660919	0.684778
GUT15	AT2G18440	AT2G18440	0.17169	0.866765	-0.0622265	0.931849	-0.0154072	0.97898	1.48239	0.000204873	0.840213	0.0372544	1.18799	0.0019241	0.536802	0.309761	0.0586262	0.962545	0.174097	0.860417	0.409974	0.425885	0.836819	0.0781242	0.0910638	0.931533	-0.00524905	1	-0.0414642	0.970044	-0.0377215	0.976137
AT2G33370	AT2G33370	AT2G33370	0.567946	0.4608	-0.172119	0.825954	-0.710208	0.152083	-0.800024	0.129466	-2.06021	2.22e-06	-0.990609	0.0316107	0.349647	0.64541	0.249784	0.8179	0.275261	0.795838	0.181629	0.816925	0.22041	0.795559	0.215964	0.834422	0.801587	0.469929	0.118214	0.919091	0.476429	0.603513
CPN10	AT1G14980	AT1G14980	0.266101	0.690939	-0.486531	0.259722	-0.719101	0.0356408	0.179124	0.716966	0.151601	0.719032	0.494872	0.148602	0.274477	0.596766	0.569195	0.220419	0.496676	0.355498	0.921761	0.00691432	0.775684	0.0414616	0.519975	0.297745	0.730353	0.271693	0.337572	0.578742	0.715531	0.205507
FLOT1	AT5G25250	AT5G25250	0.0757274	0.989818	0.812728	0.62518	1.27113	0.303218	-3.97012	0.000751404	-5.92338	9.27e-08	-0.819805	0.513374	-0.289217	0.919006	0.314899	0.921633	0.624435	0.809281	-1.53952	0.25098	2.19187	0.104056	0.347974	0.89983	-3.95098	0.0177593	-1.91962	0.301837	-0.663058	0.785412
AT1G20823	AT1G20823	AT1G20823	0.548504	0.682703	-0.558034	0.570847	1.01109	0.16319	0.0406819	0.988931	0.776653	0.29338	0.0906068	0.920287	1.41535	0.0621532	0.412494	0.782244	1.25006	0.211603	-0.309317	0.776643	-1.08014	0.213821	0.10192	0.958964	-0.877054	0.621109	-0.278014	0.852938	1.27281	0.287744
AT3G28510	AT3G28510	AT3G28510	0.825095	0.839065	0.67648	0.796208	0.99479	0.59993	-0.357744	0.910306	-9.05978	5.97e-08	-2.61156	0.108878	-1.38732	0.642348	-0.678145	0.865432	-0.163718	0.971269	-0.529687	0.861133	0.414811	0.899878	0.199438	0.967834	-1.87575	0.736639	-4.7666	0.0350276	-5.34161	0.0175719
AT5G52760	AT5G52760	AT5G52760	2.10898	0.17991	1.13603	0.474491	1.17018	0.355401	-2.78759	0.0264037	-5.46681	4.96e-07	-0.844508	0.506162	0.947686	0.593886	0.17333	0.961616	1.36635	0.494321	-1.42124	0.312688	1.37095	0.383722	0.625172	0.797754	-1.87454	0.511276	-1.47347	0.454883	-0.516156	0.844237
HA2	AT4G30190	AT4G30190	-0.415576	0.453398	-0.590044	0.156941	-1.02445	0.00180276	-2.40038	2.12e-14	-2.17691	1.59e-12	-2.28877	7.65e-14	-1.10761	0.00111905	-0.57732	0.219915	-0.914963	0.0314535	-0.422641	0.300814	-0.458952	0.309912	-0.112496	0.891805	-0.446229	0.614395	-0.0841964	0.920125	-0.566485	0.354775
BOU	AT5G46800	AT5G46800	0.116851	0.892038	-0.713344	0.0655255	-1.33793	2.53e-05	-0.896274	0.00856512	-0.268767	0.47913	-2.00638	4.92e-11	-0.288191	0.562809	-0.620351	0.159993	-0.757349	0.089503	-0.864267	0.0107636	-0.8559	0.0195239	-0.653877	0.14803	0.251494	0.817829	0.129189	0.859332	-0.0920207	0.911441
AT1G74270	AT1G74270	AT1G74270	0.773672	0.0943761	0.212746	0.699526	0.388475	0.328657	0.215814	0.673435	-0.536451	0.154524	-0.041951	0.930487	0.708573	0.0840056	0.337767	0.605343	0.51016	0.387786	0.874695	0.0194125	0.310153	0.5672	0.210848	0.778754	0.403348	0.682736	-0.354036	0.589276	0.18548	0.816234
AT2G05310	AT2G05310	AT2G05310	0.851842	0.080262	0.538368	0.27998	0.396738	0.354762	0.879137	0.0306122	1.95791	2.15e-08	-0.254087	0.559686	0.639963	0.163895	0.0728584	0.950992	0.261939	0.751955	0.0585932	0.945961	-0.172321	0.808177	-0.19083	0.821638	0.313173	0.797763	0.290366	0.701023	-0.0697792	0.945984
AT3G22160	AT3G22160	AT3G22160	1.22556	0.46689	1.43476	0.272681	2.03507	0.0474939	-0.0318446	1	-1.7191	0.102299	-0.116605	0.931615	2.8732	0.00634829	1.2815	0.424614	0.984924	0.609969	-0.52045	0.744024	2.25989	0.0537546	0.642077	0.754394	-1.96029	0.390661	-1.291	0.464183	-1.59657	0.38797
AT1G62480	AT1G62480	AT1G62480	-0.249848	0.891947	0.699975	0.474249	2.57209	0.000112487	-2.53446	0.000283681	-1.32644	0.0639348	-2.19043	0.00112588	-0.593099	0.582343	0.258394	0.88686	0.0961436	0.961874	-0.85178	0.319196	-0.249248	0.855406	-0.411974	0.779418	-0.514266	0.828296	1.04538	0.37697	0.93348	0.474309
AT4G29390	AT4G29390	AT4G29390	0.696016	0.0570234	0.341314	0.388085	0.363132	0.258194	0.700988	0.0237975	0.32927	0.304325	0.652601	0.0229301	1.03219	0.000342577	0.832755	0.0131311	0.784568	0.0340327	1.13874	6.14e-05	0.832724	0.00889941	0.605103	0.124659	0.576671	0.359522	0.127292	0.842355	0.358924	0.520324
AT5G20500	AT5G20500	AT5G20500	-0.164459	0.761028	0.0946724	0.814765	-0.0566687	0.861627	-0.669886	0.010412	-1.9049	7.27e-18	-0.987227	1.81e-05	-0.0223586	0.983904	0.012415	0.987164	0.00678294	0.994733	-0.149023	0.682815	-0.114821	0.796678	-0.00962225	0.98959	0.0385685	0.982081	0.344195	0.407635	0.102138	0.859506
MBP1	AT1G52040	AT1G52040	-0.0695696	0.993075	0.5283	0.809308	-1.87266	0.195344	5.22494	4.28e-05	5.22491	1.94e-05	1.3692	0.324661	2.6714	0.0707787	2.98369	0.0669527	-0.10689	0.978626	5.46526	1.3e-05	5.44345	3.89e-05	3.33621	0.0368033	0.142141	0.988085	2.99755	0.132563	0.922534	0.732184
AT2G21160	AT2G21160	AT2G21160	-0.22311	0.665995	-0.546188	0.0801614	-0.553658	0.0393403	-1.09952	2.14e-05	-1.48246	7.29e-10	-0.952024	0.0001283	-0.220623	0.588633	-0.236266	0.628141	-0.233191	0.653471	-0.030972	0.96606	-0.109605	0.824052	-0.342039	0.418483	0.00304341	1	-0.00156779	1	-0.0637437	0.924731
SKU5	AT4G12420	AT4G12420	0.186683	0.923144	-0.651923	0.499052	-2.4048	0.000317897	-2.76703	4.08e-05	-1.60341	0.0186421	-4.36846	2.05e-11	-0.328869	0.798228	0.0328537	0.98841	0.27305	0.874009	-0.557481	0.54893	-0.40522	0.728735	-0.917168	0.403244	0.361828	0.890255	0.483475	0.723044	0.219184	0.89832
AT3G17520	AT3G17520	AT3G17520	2.55835	0.508721	3.77559	0.111031	9.56337	9.14e-06	7.67554	0.000379614	9.87713	2.87e-08	13.0151	3.49e-10	1.0897	0.811487	2.8777	0.327378	4.60375	0.169996	-0.0662452	1	2.01423	0.483315	0.905059	0.89155	-1.56357	0.866621	0.159907	0.97833	-0.00896346	0.999706
AT5G10960	AT5G10960	AT5G10960	0.164742	0.81351	0.639443	0.0716414	0.509795	0.10414	0.993609	0.00110343	0.321784	0.335424	1.00091	0.000417086	-0.309716	0.477885	-0.0209146	0.98273	-0.0851677	0.915763	-0.310893	0.420636	-0.0392492	0.954593	0.189891	0.757214	-0.332962	0.693293	-0.0364332	0.964258	-0.45135	0.419449
AT5G51010	AT5G51010	AT5G51010	-0.255345	0.807579	-0.63762	0.292218	-0.947736	0.0466236	-1.83511	5.29e-05	-0.520834	0.305565	-1.39063	0.0018356	-0.318507	0.682332	-0.604731	0.404194	-0.539131	0.514927	-0.783224	0.131466	-0.998881	0.0651079	-0.754472	0.271158	0.40198	0.778254	0.280112	0.767537	0.295172	0.76527
AT3G52580	AT3G52580	AT3G52580	0.267337	0.813714	-0.23501	0.765731	-0.0451117	0.948078	-0.588371	0.327185	-1.75968	0.000154776	0.333695	0.546246	0.131548	0.913932	0.0202041	0.989656	0.0478712	0.973067	0.475779	0.455807	0.132336	0.895758	-0.137124	0.912598	0.613373	0.641004	-0.203325	0.850994	0.271943	0.800815
GH9A1	AT5G49720	AT5G49720	-0.78342	0.0496841	-0.904803	0.0117639	-0.992778	0.00168715	-0.995033	0.00238327	-0.22002	0.565844	-1.81633	1.09e-09	-0.88569	0.00857688	-0.754447	0.057492	-0.706449	0.110922	-1.0504	0.00107012	-0.764931	0.037353	-0.750847	0.0701043	-0.119334	0.93654	0.110962	0.883609	0.0222483	0.983895
AT1G76200	AT1G76200	AT1G76200	0.186613	0.71731	-0.0573003	0.896643	0.180872	0.538149	-0.238183	0.457471	0.211918	0.463461	-0.423185	0.0959013	0.210769	0.586359	-0.125222	0.834133	-0.200393	0.695165	-0.0190596	0.989088	0.0730888	0.884712	-0.395235	0.291578	-0.0711993	0.96152	-0.151962	0.768713	-0.353847	0.446719
ACHT4	AT1G08570	AT1G08570	0.728228	0.25471	0.810386	0.134855	1.13437	0.00977402	0.482595	0.380767	1.16944	0.00692892	1.05502	0.0146343	-2.88835	1.63e-12	-2.03104	8.54e-06	-1.53771	0.00289812	-2.24258	9.97e-08	-1.69276	0.000241386	-1.13777	0.0400149	-0.842528	0.388524	-0.813946	0.257707	-1.47734	0.0175719
AT4G38860	AT4G38860	AT4G38860	-0.421888	0.808183	-0.918691	0.372067	-3.11986	2.02e-05	-1.65494	0.0452035	-0.364315	0.70421	-6.139	1.06e-16	-1.9251	0.0188664	-1.19943	0.280027	-0.521422	0.751955	-0.227195	0.865732	-0.124161	0.940149	-0.738689	0.588992	-0.2592	0.946404	-0.591231	0.693375	-0.514574	0.749234
AT4G21105	AT4G21105	AT4G21105	0.278734	0.64901	0.405597	0.336573	1.00643	0.00103136	0.27227	0.514602	-0.285339	0.431777	0.317163	0.354291	0.468991	0.244346	-0.0085751	0.994007	0.0596882	0.94814	0.407286	0.289387	0.251502	0.611831	-0.0824237	0.920268	0.0706017	0.970179	-0.154514	0.818856	-0.20669	0.75937
OPT3	AT4G16370	AT4G16370	1.34045	0.0352328	-1.02444	0.103327	-1.65023	0.00113201	-0.115005	0.902714	-2.22101	5.23e-06	-3.65717	1.89e-14	-1.33296	0.0188557	-1.63055	0.00536974	-1.50037	0.0207079	-1.22102	0.0283759	-1.3766	0.0178623	-1.85619	0.00140124	-0.259072	0.901428	-1.25905	0.105432	-1.74966	0.01507
AT3G01690	AT3G01690	AT3G01690	-0.584922	0.453085	-0.247584	0.738998	-2.74042	2.05e-09	-0.318696	0.628444	-1.0935	0.019846	-2.79809	2.73e-10	-0.965443	0.0738139	0.170765	0.889177	-0.715283	0.346589	-1.4185	0.00319105	-0.490468	0.471156	-0.646435	0.389168	-0.246642	0.893136	0.615528	0.450591	0.128458	0.914548
EXPA6	AT2G28950	AT2G28950	0.28382	0.897563	-0.30248	0.827331	-3.70603	3.64e-06	-2.49712	0.00302687	-0.895033	0.327141	-5.08922	1.57e-10	-0.474976	0.745836	0.148182	0.954346	-0.667284	0.690551	-0.384967	0.77123	-0.156606	0.928678	-0.734142	0.628969	0.128082	0.982081	0.679794	0.667471	0.544123	0.75527
AT5G39570	AT5G39570	AT5G39570	-0.515915	0.173676	-0.399474	0.265588	-0.201927	0.532289	0.273507	0.433913	0.783673	0.0033186	0.317674	0.275806	-0.051435	0.945764	-0.376099	0.376482	-0.65271	0.0767469	-0.000113829	1	-0.175708	0.702414	-0.367039	0.40562	-0.0424781	0.982102	0.0397613	0.958284	-0.160387	0.789894
CESA5	AT5G09870	AT5G09870	-0.357767	0.7424	-1.38756	0.0169269	-2.05731	4.55e-05	-1.01043	0.0743643	0.0992559	0.892481	-2.31594	2.25e-06	-0.718525	0.278068	-0.348664	0.750497	-0.407474	0.701165	-0.531731	0.417038	-0.63241	0.37422	-0.24021	0.8344	-0.139961	0.964413	0.255482	0.813178	0.41595	0.693112
AT3G54400	AT3G54400	AT3G54400	0.0520487	0.992816	-0.135747	0.939058	-0.966223	0.382939	-2.35117	0.0229813	-0.269698	0.839505	-2.31488	0.0177975	0.187929	0.944099	0.537108	0.811197	1.07106	0.546479	1.04379	0.394069	1.42388	0.267128	1.02464	0.545687	0.1226	0.984395	1.03121	0.558378	1.77127	0.30867
AT2G44290	AT2G44290	AT2G44290	0.614429	0.642939	0.256165	0.825626	0.640322	0.414327	-0.33496	0.751273	-1.19364	0.0966138	-1.33728	0.0530071	0.613616	0.560527	0.0720533	0.972867	0.501182	0.733059	-0.506465	0.601429	0.0316082	0.988362	-0.108197	0.956967	-0.947658	0.599566	-1.46101	0.173596	-1.59928	0.161279
AT3G63540	AT3G63540	AT3G63540	0.495558	0.158158	0.336734	0.329772	0.0712087	0.835769	0.289449	0.365494	0.820508	0.000974931	-0.164402	0.583103	0.684363	0.0125743	0.359742	0.365014	0.485146	0.205331	0.306104	0.337001	0.15609	0.723357	0.277112	0.540818	0.261897	0.727942	-0.0400178	0.955075	0.0252933	0.975648
AT1G10140	AT1G10140	AT1G10140	-0.078686	0.986311	2.56595	0.0164609	1.80293	0.0626339	2.43799	0.0148079	2.47066	0.00807737	1.21081	0.219796	0.260059	0.912597	0.335607	0.895073	0.365153	0.878312	0.595059	0.6693	4.99124	7.05e-08	0.854946	0.621485	-0.567216	0.873311	-0.758227	0.693482	-1.26357	0.480191
GLK2	AT5G44190	AT5G44190	-0.346712	0.672196	-0.558632	0.310673	-0.752897	0.0842562	0.0221676	0.99207	1.20533	0.00273283	-0.631605	0.141206	-0.98371	0.0303551	-0.658476	0.277519	-0.429719	0.582612	-0.0250377	0.998196	-0.179012	0.818936	-0.333072	0.676015	-0.227241	0.884903	-0.153563	0.872928	-0.217944	0.815346
CML41	AT3G50770	AT3G50770	0.66845	0.812571	1.25238	0.432898	1.47012	0.243448	1.86947	0.17666	-5.86544	2.95e-07	-0.139499	0.92851	-0.0492897	1	-0.349028	0.915164	-0.0230487	0.995926	-1.66227	0.283992	1.24522	0.453654	-0.0676455	0.985867	-1.37629	0.705832	-1.20204	0.57194	-1.04997	0.655477
VDAC2	AT5G67500	AT5G67500	-0.0676962	0.900142	-0.148064	0.620343	0.524174	0.00820038	-0.162629	0.538954	0.113171	0.642253	0.850921	4.04e-06	0.815823	2.02e-05	0.326605	0.249896	0.182472	0.642608	1.07591	6.58e-09	0.684396	0.00108211	0.326655	0.266697	-0.0186591	0.992369	-0.302251	0.374718	-0.321662	0.380847
AT1G67870	AT1G67870	AT1G67870	0.814112	0.443984	0.0385556	0.976496	0.212531	0.797572	2.05861	0.00178542	2.10788	0.000680956	-0.0759351	0.930859	0.961134	0.241983	0.511984	0.688914	-0.489715	0.718508	0.859841	0.268857	0.536892	0.592685	-0.0413761	0.985	-0.152021	0.968547	-0.0559491	0.97581	-0.235293	0.881614
CIPK5	AT5G10930	AT5G10930	1.30437	0.167916	2.25187	0.00249921	2.76812	2.42e-05	2.87454	2.15e-05	2.86476	9.07e-06	2.79754	1.36e-05	-3.62954	1.24e-07	-0.124649	0.954346	-0.264107	0.880809	-1.73303	0.0177644	-0.171288	0.904814	0.327252	0.831599	-1.26548	0.425414	-0.135544	0.940333	-1.28894	0.306271
NAP1;2	AT2G19480	AT2G19480	0.695309	0.085281	0.0816701	0.880597	-0.209159	0.579569	0.0082881	1	-0.504058	0.12508	0.777703	0.0110347	0.469328	0.236354	0.654353	0.104857	0.537682	0.261812	0.845681	0.00904349	0.543664	0.165533	0.585459	0.184991	0.481389	0.53847	0.125606	0.857491	0.302459	0.631789
AT1G80380	AT1G80380	AT1G80380	-0.14703	0.818586	-0.64426	0.0474094	-0.890841	0.00133945	-0.779273	0.0062913	0.308922	0.31015	-1.11542	2.69e-05	-0.0348975	0.968652	-0.577603	0.107098	-0.292961	0.572196	-0.285233	0.415588	-0.630902	0.0490363	-0.532397	0.174805	0.443493	0.508467	0.0768467	0.91127	0.13891	0.825501
YLS8	AT5G08290	AT5G08290	0.294477	0.460496	0.575239	0.0366257	0.646336	0.00627604	0.309967	0.283543	-0.316887	0.219917	0.240488	0.353515	0.384366	0.195201	0.161111	0.753311	-0.00179294	0.998141	0.187083	0.572375	0.130085	0.756961	0.289345	0.464672	0.000498185	1	-0.203944	0.656894	-0.241502	0.61317
AT4G27560	AT4G27560	AT4G27560	-0.386517	0.758736	-0.595441	0.465356	-1.75431	0.00388274	-0.150305	0.878856	0.304442	0.670146	0.688161	0.262715	2.56407	2.84e-06	1.14681	0.131391	-0.27788	0.845726	3.23145	1.64e-09	2.43025	2.99e-05	2.51889	2.91e-05	-0.293958	0.898729	1.1919	0.184242	1.17246	0.242624
MAPKKK21	AT4G36950	AT4G36950	0.27805	0.96062	1.24813	0.594312	2.46317	0.139102	2.7651	0.125341	0.935669	0.62903	0.244436	0.906134	7.78364	2.07e-07	5.008	0.00466608	2.22159	0.395073	3.78212	0.024827	4.58593	0.00806792	1.2541	0.677357	-2.54464	0.569265	2.47484	0.355439	-1.05292	0.75567
SEC61 BETA	AT2G45070	AT2G45070	-0.105508	0.899185	-0.065948	0.903092	0.331988	0.331483	-0.601564	0.076459	-0.415986	0.207484	-0.730507	0.0151903	0.347998	0.415489	-0.0605506	0.949412	0.138834	0.85517	0.251553	0.547077	0.330084	0.453209	0.0289669	0.976555	-0.0591823	0.976196	-0.361116	0.507557	-0.257603	0.683847
MEE59	AT4G37300	AT4G37300	0.434581	0.574543	1.21061	0.0112042	0.696608	0.12322	0.798166	0.0949625	0.951465	0.026635	-0.10429	0.848103	0.684869	0.195295	1.23317	0.0127772	0.951548	0.105787	0.86811	0.0625046	0.768118	0.150198	0.960727	0.0863958	0.00584333	1	0.63168	0.3867	0.421909	0.622829
NTF2B	AT1G27970	AT1G27970	-0.162366	0.835785	-0.348974	0.443983	0.698575	0.0362571	-0.463991	0.233811	-1.30001	2.6e-05	0.184365	0.628894	0.106185	0.888076	-0.277999	0.659398	0.205262	0.780644	0.227684	0.624267	-0.244686	0.639918	0.0626527	0.945655	-0.0298559	0.992644	-0.476915	0.39267	-0.0919348	0.911668
AT1G22160	AT1G22160	AT1G22160	0.384063	0.820764	0.277738	0.817283	0.195381	0.837371	2.79062	9.24e-05	2.26276	0.00111034	1.23677	0.0914391	-0.918741	0.346808	-0.404248	0.80862	-0.483595	0.761452	-1.61759	0.0373817	-0.709668	0.505804	0.237812	0.893661	-0.297529	0.926656	0.0335808	0.98661	0.370285	0.82091
AT2G15960	AT2G15960	AT2G15960	0.0192186	1	3.63331	7.41e-07	1.75951	0.0167265	2.88556	7.16e-05	4.09971	1.47e-09	0.679971	0.397347	3.42753	8.53e-07	2.65302	0.000889086	1.15807	0.315912	2.40038	0.00113547	2.47247	0.00169339	1.09217	0.332674	-0.622676	0.791138	1.17672	0.347646	0.273932	0.87769
ATCG01160	ATCG01160	ATCG01160	2.85378	2.94e-06	2.03323	0.00205354	1.80592	0.00316786	1.67961	0.00790196	3.20275	1.19e-08	1.89682	0.00139114	3.13265	3.2e-08	2.88849	2.95e-06	3.0987	9.43e-07	2.70952	3.15e-06	2.3904	0.000144366	3.00741	1.97e-06	0.450623	0.827179	0.143086	0.927197	0.617595	0.623469
AT4G20830	AT4G20830	AT4G20830	-1.20124	0.317365	-0.476287	0.69867	0.712255	0.433003	-2.3588	0.0042086	-2.63919	0.00056655	0.174798	0.863634	1.45143	0.121048	0.632304	0.686554	0.0205244	0.995222	-0.273663	0.84168	0.887028	0.432306	-0.615909	0.688342	-1.24481	0.530408	0.223376	0.910365	-0.0112075	0.997376
ATCG00970	ATCG00970	ATCG00970	2.85378	2.94e-06	2.03323	0.00205354	1.80592	0.00316959	1.67961	0.00790744	3.20275	1.19e-08	1.89682	0.00139217	3.13232	3.22e-08	2.8891	2.95e-06	3.0987	9.43e-07	2.7098	3.15e-06	2.3904	0.000144366	3.0055	1.97e-06	0.450623	0.827179	0.143092	0.927197	0.617594	0.623469
PATL1	AT1G72150	AT1G72150	0.781521	0.190746	0.988537	0.0488036	0.239771	0.645025	0.357326	0.530951	0.448759	0.351839	0.248607	0.617145	0.459167	0.453675	0.912138	0.0986686	1.00263	0.0829307	0.135633	0.855891	0.484024	0.427158	0.617367	0.355768	-0.16675	0.932107	-0.18475	0.845747	-0.169042	0.868604
NdhL	AT1G70760	AT1G70760	-0.499786	0.486619	-1.06765	0.0293642	-2.25977	4.13e-08	-0.312119	0.589898	0.854074	0.0472615	-3.01205	5.47e-14	-0.324104	0.637922	-1.0545	0.0416591	-0.98266	0.0902188	-1.02285	0.0221685	-1.24959	0.00731597	-1.0119	0.0651154	0.329436	0.815727	0.265217	0.76051	0.258275	0.78087
TUB3	AT5G62700	AT5G62700	-0.108834	0.957397	-0.290822	0.765613	-2.29265	8.85e-05	-0.657951	0.382442	-0.0352311	0.97407	-1.57131	0.00756399	0.599002	0.496791	0.435351	0.726688	-0.121604	0.945297	0.490842	0.550992	0.149324	0.904814	0.232639	0.870116	0.516596	0.785526	0.906755	0.375799	0.855864	0.444766
FLR1	AT3G12145	AT3G12145	-0.367824	0.87256	1.03324	0.398922	-1.65915	0.0807531	-1.18885	0.268537	0.344721	0.767808	-2.69366	0.00271647	3.51795	3.9e-05	2.69163	0.00779166	-0.164726	0.94959	4.64142	2.28e-08	4.68822	6.17e-08	2.89949	0.00383925	0.363404	0.926656	2.20477	0.095982	1.31232	0.423244
AT5G02610	AT5G02610	AT5G02610	0.578847	0.314127	-0.373087	0.489033	-0.207821	0.657842	-0.171161	0.772383	-0.247393	0.591306	-0.118668	0.802055	0.412919	0.447421	0.443992	0.486957	0.512605	0.429004	0.826094	0.043529	0.560729	0.26534	0.324932	0.654207	0.633308	0.496081	-0.0868611	0.927763	0.341344	0.664289
psbK	ATCG00070	ATCG00070	0.0992791	0.959916	0.122812	0.903211	-0.45613	0.496425	0.0230984	0.99932	1.1109	0.0565788	-1.27807	0.0249708	1.04767	0.118324	0.160757	0.921986	0.0591681	0.970848	0.431874	0.586114	-0.59287	0.475473	-0.0900902	0.956967	-0.545121	0.749203	-1.06152	0.253785	-0.703748	0.524296
LRR XI-23	AT1G09970	AT1G09970	-0.110394	0.956493	0.00655743	0.996071	0.0825303	0.91869	-0.78958	0.270679	-1.85991	0.00122788	-0.160878	0.829426	3.0484	4.23e-08	0.671829	0.503787	0.0346805	0.986197	1.82859	0.00237302	0.864039	0.270757	0.355599	0.775483	-0.537764	0.771301	0.309633	0.804256	-0.0791487	0.963987
AT1G14345	AT1G14345	AT1G14345	0.214862	0.863705	-0.122285	0.887383	-0.492998	0.379372	-0.821664	0.142899	0.618428	0.249288	-1.15336	0.0186545	-0.717904	0.253262	-0.746768	0.309959	-0.0257221	0.98826	-0.658717	0.264586	-0.898917	0.142926	-0.47133	0.598762	0.337687	0.844785	-0.241793	0.818432	-0.218192	0.851254
GT72B1	AT4G01070	AT4G01070	0.930792	0.131953	0.461339	0.479801	1.30289	0.00427836	0.73693	0.167309	1.33175	0.00312462	0.57045	0.24358	-0.325573	0.678068	-0.455687	0.587965	-0.174628	0.882076	-0.0281909	0.998046	-0.578666	0.367367	-0.234728	0.819193	-0.269435	0.87521	-1.07056	0.132651	-0.839567	0.316991
SIS	AT5G02020	AT5G02020	-0.903135	0.612029	4.28982	5.64e-06	2.46886	0.00721025	1.79213	0.0843238	2.6194	0.00422674	4.59175	7.51e-08	-1.67485	0.148532	-0.00914888	0.999854	-0.822083	0.660302	-2.48256	0.0146679	1.11712	0.396853	-0.718973	0.691581	-1.59034	0.498126	-0.503063	0.804256	-2.32591	0.132033
GRF2 AT1G78300	AT1G78300	AT1G78300	0.05566	0.940355	0.210431	0.548669	0.635172	0.00846994	-0.192127	0.552908	0.376325	0.139665	-0.379384	0.130277	0.397833	0.178561	0.340699	0.357261	0.205181	0.674793	0.256401	0.403125	0.329465	0.313033	0.325452	0.403381	-0.022872	0.992365	-0.0160542	0.980691	-0.0486214	0.939921
AT2G32190	AT2G32190	AT2G32190	-0.349464	0.904665	1.68252	0.208625	3.63476	0.000329058	-3.37994	0.00288326	-2.53743	0.0182619	0.751999	0.526241	2.90708	0.00878396	1.35906	0.416619	1.31531	0.471711	0.732586	0.624238	3.5901	0.00132932	1.96114	0.184688	-1.57307	0.558708	0.56132	0.80195	-1.02605	0.629048
AT3G61260	AT3G61260	AT3G61260	0.493432	0.263769	0.663393	0.066675	0.0957753	0.809861	-0.0116511	1	1.18354	3.79e-05	-0.490091	0.122254	0.745846	0.023263	0.901219	0.0100041	0.739199	0.068885	0.216229	0.611925	0.33932	0.435118	0.509894	0.256472	0.0584552	0.976196	0.374056	0.4879	0.178534	0.791375
NAP1;1	AT4G26110	AT4G26110	0.104723	0.943345	-0.336116	0.634706	-1.13569	0.0180756	0.0102496	1	-1.44771	0.00152131	-0.432242	0.40508	0.191737	0.842378	0.230835	0.838636	0.46432	0.608265	0.660619	0.238782	0.0375186	0.974433	0.591564	0.443408	0.589323	0.64598	0.0680092	0.958306	0.5955	0.508481
HMGB2	AT1G20693	AT1G20693	0.43178	0.681005	1.23927	0.0406886	0.656546	0.25194	1.96773	0.000162896	0.452833	0.453957	0.97049	0.0648821	0.632907	0.378251	0.191593	0.888895	0.437018	0.678733	1.01753	0.0777273	0.6183	0.399423	1.15736	0.0920619	-0.395255	0.82567	-0.727039	0.421456	-0.466634	0.664422
AT2G39390	AT2G39390	AT2G39390	0.46838	0.533381	-0.439981	0.466151	-0.15409	0.7793	-0.658655	0.188623	-0.912173	0.0357263	0.247947	0.620276	0.404764	0.527655	0.239124	0.809599	0.345515	0.696495	1.03	0.0231426	0.467732	0.446357	0.306791	0.717075	0.782148	0.425299	-0.218787	0.809718	0.471057	0.577327
AT1G55260	AT1G55260	AT1G55260	0.300766	0.87283	-0.798901	0.433143	-3.64889	6.26e-07	-0.248971	0.836181	0.949222	0.233126	-3.35139	2e-06	0.69073	0.526661	0.753978	0.563795	-0.730726	0.604529	1.1654	0.166889	1.107	0.250568	0.675205	0.614879	0.0944853	0.984395	0.766273	0.568213	0.280191	0.873903
BI1	AT5G47120	AT5G47120	0.083613	0.968627	0.292709	0.74431	0.677797	0.276443	0.590211	0.409662	-0.493634	0.44978	0.0726915	0.923248	0.166907	0.901873	-0.3733	0.759545	-0.172031	0.908945	-0.184356	0.851145	-0.167906	0.882867	0.0536835	0.976361	-0.595928	0.713493	-0.991575	0.288549	-0.926625	0.370185
ECT3	AT5G61020	AT5G61020	0.198393	0.858091	-0.798458	0.14144	-1.10768	0.0135663	-0.746155	0.13755	-1.4715	0.000492481	-0.272369	0.59192	-0.403985	0.544019	-0.108987	0.932534	-0.23603	0.821102	0.735841	0.141713	0.341475	0.622984	-0.0503603	0.971259	0.367704	0.794606	-0.392036	0.638688	0.0783793	0.947417
VAMP711	AT4G32150	AT4G32150	0.77861	0.153113	0.487247	0.365123	0.743877	0.0715194	1.16717	0.00489899	-0.4969	0.253628	0.465625	0.271309	-0.275234	0.690213	-0.00837231	0.996469	0.0812973	0.944377	-0.733014	0.103408	-0.266456	0.686191	0.0438548	0.97244	-0.556136	0.598048	0.0628239	0.954659	-0.0359087	0.977004
NCBP	AT5G18110	AT5G18110	-0.71105	0.186914	-0.238529	0.678144	-0.305156	0.485115	-0.594727	0.180925	-2.68058	5.5e-15	-0.223724	0.605319	-0.697006	0.127344	-0.493617	0.402462	-0.707216	0.201219	-1.09706	0.00562134	-0.78593	0.0777849	-0.580311	0.307037	-0.156098	0.926656	0.223598	0.771836	0.0653261	0.948915
AT3G22275	AT3G22275	AT3G22275	-1.61381	0.543833	1.17477	0.605752	1.50735	0.363421	-0.0241212	1	2.89488	0.0582489	0.197393	0.921057	6.99231	2.44e-07	6.90052	4.83e-06	3.01283	0.144875	3.35518	0.0279838	6.12326	5.31e-05	4.20201	0.015208	-2.94905	0.400347	5.96776	0.00129272	0.935929	0.769335
[truncated: 31,526 more rows]
