# Supplementary material for: Nuclear coat protein drives a multifaceted tolerance program during Turnip crinkle virus infection
Source: Research Square preprint supplement (doi:10.21203/rs.3.rs-8695072/v1), 2026-02-12
Supplement: Supplementary file 8 [file cde941314cb3b3a868dfdbd1.xlsx]

## Sheet: Supplementary Table 3
symbol	ensembl_ID	User_ID	atg5Mock_1	atg5Mock_2	atg5Mock_3	atg5TCV_1	atg5TCV_2	atg5TCV_3	atg5NES_1	atg5NES_2	atg5NES_3	rbohDMock_1	rbohDMock_2	rbohDMock_3	rbohDTCV_1	rbohDTCV_2	rbohDTCV_3	rbohDNES_1	rbohDNES_2	rbohDNES_3	rbohFMock_1	rbohFMock_2	rbohFMock_3	rbohFTCV_1	rbohFTCV_2	rbohFTCV_3	rbohFNES_1	rbohFNES_2	rbohFNES_3	rbohDFMock_1	rbohDFMock_2	rbohDFMock_3	rbohDFTCV_1	rbohDFTCV_2	rbohDFTCV_3	rbohDFNES_1	rbohDFNES_2	rbohDFNES_3	Col0Mock_1	Col0Mock_2	Col0Mock_3	Col0TCV_1	Col0TCV_2	Col0TCV_3	Col0NES_1	Col0NES_2	Col0NES_3	sid2Mock_1	sid2Mock_2
ATCG00950	ATCG00950	ATCG00950	20.4268	20.6459	18.2106	17.782	17.2191	17.9203	18.0751	18.583	19.1389	20.0866	19.3991	19.413	18.2683	17.1886	17.408	19.2224	19.1333	17.8549	18.9161	20.6399	19.0321	17.5329	17.851	17.1674	19.2846	18.2758	17.3009	19.5781	19.5922	19.7732	16.6822	18.146	19.7226	18.7808	19.06	20.0109	15.1391	14.677	14.9516	14.1205	13.4132	13.1499	14.9017	14.7259	12.3397	14.5091	14.8599
ATCG01180	ATCG01180	ATCG01180	20.4267	20.6458	18.2104	17.7819	17.219	17.9202	18.0749	18.5829	19.1387	20.0865	19.3989	19.4128	18.2682	17.1884	17.4078	19.2223	19.1332	17.8547	18.9159	20.6397	19.0318	17.5328	17.8509	17.1673	19.2844	18.2756	17.3007	19.5779	19.592	19.773	16.682	18.1458	19.7225	18.7806	19.0599	20.0108	15.139	14.6767	14.9508	14.1199	13.4126	13.1489	14.9015	14.7256	12.3397	14.5089	14.8596
RBCS1A	AT1G67090	AT1G67090	18.4642	18.7286	18.6489	15.1622	15.3959	15.0912	16.9852	15.8646	17.338	18.7383	18.4729	18.6225	16.6249	17.419	16.7842	17.6406	17.0049	17.3786	18.3938	18.1773	18.1534	16.5345	17.5484	16.4757	16.973	16.0461	17.5834	17.4441	17.6344	16.5978	15.315	15.0822	12.9419	17.6257	17.5725	16.6552	18.2363	18.5115	18.5044	17.6927	16.9749	17.2634	17.3781	17.6777	17.7625	18.6539	18.6786
CAB1	AT1G29930	AT1G29930	18.0022	18.1528	18.1461	13.4992	14.1507	14.033	16.8554	15.6959	17.181	17.8731	17.6364	17.6849	15.7107	16.873	16.5097	17.6875	16.5136	17.6775	17.639	17.2098	17.4602	16.0865	17.3613	15.8006	16.4124	15.7884	17.6062	16.0888	16.8167	15.8228	12.6676	13.795	13.0696	16.4551	16.3236	15.958	17.3406	17.886	17.5687	17.3648	16.4709	16.9863	17.2652	17.4841	17.7883	17.5837	17.8006
RBCS3B	AT5G38410	AT5G38410	16.8496	17.2975	17.3164	12.3227	12.6613	12.569	14.0923	12.981	15.7518	17.6625	17.4416	17.4242	14.6027	15.7086	14.8082	15.4447	15.4084	15.1248	17.3278	17.1399	17.0726	14.6068	15.5675	14.5838	15.4234	14.1471	15.5263	15.7598	16.6293	14.4833	12.2169	12.1477	10.9488	16.6698	16.1458	14.9092	16.8944	17.2526	17.1412	15.725	14.7604	15.2792	15.2675	16.0644	15.2739	17.6327	17.7139
CAB2	AT1G29920	AT1G29920	15.8995	16.1693	16.4655	12.3408	12.8886	12.3261	15.4965	14.3339	15.5901	16.5675	16.0378	16.4494	14.7286	16.0124	15.4059	16.5866	15.6606	16.5126	16.1578	15.8287	15.9846	14.8261	16.384	14.5981	15.8301	15.019	16.5527	15.464	16.0213	14.5874	11.4885	13.3194	11.6688	15.7002	15.6435	14.9283	16.1089	16.4549	16.1574	16.3483	15.5928	15.7864	16.4692	16.2733	16.4397	16.3995	16.5916
RCA	AT2G39730	AT2G39730	16.7304	16.7783	16.1277	13.813	13.8243	13.8772	15.0258	13.8058	15.3993	16.4529	16.7932	16.0693	14.4254	15.1801	14.3856	15.1494	15.4463	15.1154	16.1383	16.2211	15.9036	14.76	15.0595	14.766	15.3784	14.5618	14.9812	16.4726	16.4494	16.1591	13.9614	13.8673	10.6062	16.4053	16.4476	15.6894	16.8251	16.7926	16.6	15.5616	15.4198	15.3146	15.9993	15.9909	15.738	16.835	16.901
RBCS1B	AT5G38430	AT5G38430	16.0471	16.4158	16.4354	11.6738	11.9687	11.7263	13.3816	11.8922	14.6742	16.574	16.3099	16.2461	13.8104	14.8596	13.9199	14.5689	14.3336	14.2601	16.2072	16.0099	15.9856	13.6898	14.6317	13.6616	14.3407	13.0015	14.5571	14.4984	15.2535	13.4391	11.5274	11.2867	9.7543	15.2827	14.8539	13.3866	15.8486	16.3688	16.3156	15.054	14.0651	14.631	14.5411	15.1425	14.7141	16.5531	16.808
LHB1B2	AT2G34420	AT2G34420	16.0604	16.0878	15.6928	13.3803	13.7681	13.8516	14.8302	14.0839	15.1527	16.5239	16.8558	16.3519	14.6723	15.1368	14.3453	15.1269	15.5726	15.1261	16.1455	15.9953	16.0555	14.571	14.5978	14.6193	15.5432	14.4467	14.9312	16.4075	16.6799	16.1992	13.1314	13.942	12.5691	16.4778	16.4783	16.3961	16.2868	16.1472	15.9364	15.2018	15.0233	14.9023	15.3245	15.477	14.5736	16.2752	16.607
LHCB5	AT4G10340	AT4G10340	15.8921	16.2791	16.1774	12.2109	12.6384	12.3563	14.7498	13.7828	15.2059	16.4991	16.6824	16.2874	14.3397	15.3808	14.7746	15.2178	14.911	15.1341	16.2609	15.9356	16.0681	14.5063	15.4988	14.2958	15.0653	13.9423	15.2537	15.3504	15.8707	14.7145	11.3166	11.8111	10.1396	15.6075	15.5572	14.6931	16.3757	16.3644	16.2166	15.7671	14.7973	15.3402	15.1833	15.5648	15.1821	16.3705	16.5742
CAB3	AT1G29910	AT1G29910	15.4559	15.6806	15.8349	11.1979	11.9537	12.1127	14.0888	13.2175	14.4846	16.5958	16.1362	16.3826	13.6087	14.798	13.7533	15.2023	14.4684	15.0541	16.4126	15.8344	16.3158	13.7068	14.8914	13.5746	14.5727	13.6501	15.2235	14.703	15.7288	14.7501	10.5104	12.5232	10.2066	15.1948	15.1664	14.5895	15.1278	15.9747	15.3434	14.8972	14.0468	14.3484	14.686	14.7795	14.3265	15.9599	16.26
PSBR	AT1G79040	AT1G79040	16.2681	15.9379	15.8169	13.753	14.0907	14.0633	14.4954	13.8377	15.1223	16.2379	16.5594	15.8102	14.4312	14.9	14.1661	14.4331	14.7992	14.141	15.9496	16.0037	15.7112	14.2154	14.7708	14.4288	15.1605	13.8806	14.1967	16.1015	15.9978	15.5232	13.1595	13.3403	12.2773	15.8117	16.06	15.9416	15.9059	15.6691	15.6932	15.0362	14.4597	14.4631	14.8355	15.0402	13.9941	15.647	16.3922
LHCB3	AT5G54270	AT5G54270	15.2367	15.617	15.5666	10.9732	11.6672	11.7194	13.3374	12.3544	14.3941	16.0982	16.237	15.8587	13.2697	14.2973	13.4451	14.3238	14.1937	14.2003	15.8331	15.522	15.7335	12.865	14.266	13.001	14.393	12.9637	14.363	14.9543	15.562	14.3196	10.7835	11.3984	9.76966	15.1986	15.1952	14.351	16.0346	16.047	15.8261	14.9883	14.2786	14.474	14.4543	15.0939	14.2884	16.0354	16.3294
DRT112	AT1G20340	AT1G20340	15.8155	15.9014	15.8403	12.2666	12.5831	12.3015	12.9668	12.1885	14.5358	16.27	16.3013	15.9352	13.5522	14.3399	13.6353	13.8303	14.1441	13.3436	15.9623	15.9241	15.7769	13.2078	14.3711	13.2256	14.4146	12.8166	13.8224	15.2431	15.5688	14.2062	11.3983	11.9177	10.4279	15.3219	15.3695	14.5136	15.6596	15.695	15.685	14.4615	13.816	13.9864	13.81	14.8162	13.6041	15.8293	16.1938
psbM	ATCG00220	ATCG00220	16.3954	16.0749	15.8433	14.4637	14.72	15.2311	14.594	14.0946	15.5771	16.3575	16.779	15.7973	14.834	14.0575	14.412	14.6668	15.2516	14.3453	15.978	15.8698	15.8028	13.7794	15.0286	13.9134	15.309	14.3139	12.415	16.2693	16.0364	15.7518	12.9592	14.3131	13.5842	15.562	15.8856	16.1172	15.0609	14.7367	14.6939	13.8616	13.8469	13.5	14.2148	14.3724	13.2949	14.6447	15.4235
RBCS2B	AT5G38420	AT5G38420	15.0393	15.5262	14.6783	9.25267	9.76083	10.6304	11.9108	10.4212	13.5476	15.9196	16.2491	15.4183	12.5637	13.8244	12.2363	13.1302	12.8597	12.7276	15.5377	15.6876	15.3412	12.3382	13.3076	12.303	13.5452	11.6873	13.165	14.7238	15.4586	13.917	9.4959	8.7976	9.40286	15.2957	14.996	13.8178	15.6512	15.5629	15.5663	14.0064	13.1361	13.3617	12.8833	14.2157	13.5664	15.6512	16.2689
LHCB2.1	AT2G05100	AT2G05100	15.6286	15.6799	15.3835	12.8717	12.9443	12.7987	13.0054	12.8234	14.5989	15.5897	15.8191	15.6071	13.3334	14.0052	13.6341	13.2078	13.8771	12.6124	15.356	15.1441	15.3415	12.7649	13.4713	12.9122	14.1333	12.2336	12.9737	15.6869	15.9133	14.7854	11.846	12.239	10.8026	15.6887	15.7002	15.0575	16.0208	15.7818	15.5542	14.6089	14.1326	14.1897	13.8225	14.8634	13.3685	15.7077	15.8752
LHCA4	AT3G47470	AT3G47470	15.2525	15.4774	15.2405	11.6165	11.9426	12.0639	13.4626	12.6217	14.2806	15.8596	15.9788	15.6265	13.2304	14.0714	13.4794	14.1187	14.1247	14.0345	15.4717	15.1224	15.4172	13.0265	13.9336	12.9779	14.2759	12.9294	14.0956	15.2247	15.5847	14.8263	11.7452	12.055	10.5907	15.3548	15.3026	14.9924	16.0306	15.9097	15.6586	14.8312	14.2256	14.3063	14.5245	15.0298	14.1474	15.9444	16.1546
AT1G07590	AT1G07590	AT1G07590	13.4821	12.846	11.2149	17.3211	17.6732	17.2483	13.7414	14.2791	12.6102	12.6032	14.0581	11.109	15.4123	14.2493	12.7648	11.957	12.1442	11.9859	12.8577	13.7079	11.5852	14.1202	13.0746	15.2363	13.2522	13.2559	11.7838	14.6266	13.2491	14.2937	16.4073	15.1513	13.5629	13.64	14.4252	14.4601	13.4698	11.5389	12.5088	13.4338	14.1864	13.3959	11.9442	11.5368	12.2303	10.531	12.5275
atpE	ATCG00470	ATCG00470	15.9096	15.8748	15.7434	13.0796	13.1761	13.7905	13.6712	13.1721	14.9768	16.1843	16.2922	15.7531	13.8259	13.9259	13.9459	14.2683	14.7549	13.8226	15.6961	15.888	15.4409	13.4673	14.4458	13.2522	14.8332	13.7436	13.8886	15.3197	15.5869	14.9612	12.3147	13.3406	12.2573	15.5352	15.3503	15.2227	14.2286	14.4298	14.1723	13.0608	13.0297	12.9981	13.3062	13.7418	12.3959	14.4186	14.8492
LHCA3	AT1G61520	AT1G61520	15.1324	15.2325	15.0027	11.8255	12.291	12.129	13.2834	12.5278	14.1316	15.6115	15.8899	15.2508	13.2979	13.9918	13.2312	13.6497	13.8733	13.4929	15.3897	15.1856	15.2242	13.1293	13.8373	13.0623	14.1395	12.7383	13.3923	15.1442	15.3267	14.857	12.172	12.4707	11.4744	15.1269	15.1356	14.8968	15.8034	15.6333	15.5353	14.5774	14.0741	14.0853	14.2581	14.7747	13.8471	15.6361	16.0228
PSAG	AT1G55670	AT1G55670	15.2281	15.4635	15.1333	11.052	11.2266	11.9922	12.3347	11.7313	14.0926	15.7823	15.7896	15.4688	12.7849	13.4696	12.9151	13.3018	13.7682	12.6454	15.6181	15.3401	15.4744	12.5725	13.7369	12.5073	13.9954	12.4121	13.1082	14.6379	15.1414	14.1257	10.3476	11.1841	10.0111	14.9049	14.7559	14.4472	15.3163	15.3594	15.0801	13.9237	13.2374	13.4833	13.6715	14.4509	12.9699	15.494	15.6648
FED A	AT1G60950	AT1G60950	15.2682	15.4316	15.6156	12.1162	12.5209	11.9309	12.863	12.3187	14.248	15.7467	15.4972	15.4932	13.2531	13.656	13.2092	13.615	13.6632	13.3401	15.5929	14.9567	15.3222	12.8909	13.638	12.6635	13.3608	11.687	13.6074	14.2553	14.0056	13.7722	12.7755	12.2166	10.5959	14.7847	14.3355	12.5811	15.0652	15.5272	15.4273	13.7768	13.0984	13.4947	13.6783	14.4945	13.5286	15.5217	15.7813
LHCA1	AT3G54890	AT3G54890	14.7635	15.0566	14.9971	10.4314	10.7385	11.1919	12.4266	12.0129	13.7247	15.8462	15.8608	15.5449	12.5422	13.6158	12.8594	13.4954	13.6376	13.1642	15.3819	14.9954	15.3533	12.7084	13.4701	12.6735	13.9057	12.4577	13.1911	14.6721	15.2325	14.2233	11.158	11.3571	10.8882	14.9019	14.8724	14.2846	15.1407	15.4031	15.0477	13.7538	13.1766	13.332	13.5307	14.2015	12.9121	15.5509	15.8137
GER1 AT1G72610	AT1G72610	AT1G72610	15.3106	15.8522	15.3814	12.008	12.2525	12.2062	12.8408	11.0688	14.4199	15.196	14.5795	14.8905	14.1169	14.5882	13.8179	14.3609	14.3431	13.5958	15.2474	15.0818	14.7367	13.209	14.5276	13.1359	14.2604	12.955	13.7572	10.8929	12.1029	9.39905	8.71217	8.54929	8.10726	11.7817	12.1075	7.87595	15.1546	15.8407	15.5731	14.6556	14.5184	14.2568	14.4709	14.9131	14.3073	15.3566	15.7426
AT5G42530	AT5G42530	AT5G42530	15.9833	15.7538	15.2211	15.0756	15.2094	15.0647	15.2362	14.9874	15.6881	15.4551	14.5922	15.7091	15.663	15.5945	14.9596	14.7361	15.6086	14.4064	14.6743	14.5505	14.9277	15.7679	14.2699	15.5091	15.9519	14.9962	14.3281	12.8648	14.1937	10.9634	12.8789	12.2913	10.4124	14.2752	13.5453	12.2329	15.649	14.8658	15.7506	14.6947	15.0846	15.0109	14.5578	15.1527	14.303	13.614	13.767
PSAL	AT4G12800	AT4G12800	15.1094	15.2053	15.1033	11.5999	12.2088	12.0142	12.8039	12.0404	14.1042	15.7375	15.8379	15.3763	13.2019	14.1226	13.3845	13.7509	13.9092	13.378	15.4435	15.3143	15.2895	13.1207	14.1245	13.0999	14.2244	12.9453	13.498	14.9074	15.2657	14.3893	11.6851	12.4425	11.2332	15.0811	15.0283	14.7894	15.3546	15.3262	15.1103	14.2599	13.5425	13.7511	13.7888	14.3937	13.3023	15.3096	15.5701
ECS1	AT1G31580	AT1G31580	16.1905	15.7205	14.6145	14.702	14.8207	15.7357	15.3863	15.1605	15.7004	15.0728	15.1848	14.9553	15.7653	15.0581	14.6977	14.5771	15.5801	14.1266	14.2263	14.5607	14.7265	15.5787	13.6779	15.3479	15.7797	15.0319	13.5664	15.107	14.7744	14.0756	12.2766	11.819	9.39496	14.6295	14.917	13.6792	15.8216	14.8386	15.5668	14.4213	15.3813	14.8097	15.2975	15.2841	14.3667	13.9582	14.4875
PSAF	AT1G31330	AT1G31330	14.6662	15.1082	15.0262	10.7495	11.0031	11.3519	12.1608	11.5926	14.0631	15.5565	15.6429	15.4139	12.6184	13.5593	13.1018	13.1869	13.6444	12.7408	15.4676	15.0788	15.3557	12.5423	13.6218	12.345	13.8335	12.1862	13.1543	14.1427	14.7277	13.6225	10.7288	10.9243	9.78183	14.7133	14.462	13.4495	15.0312	15.2804	14.9776	13.6517	12.9939	13.3269	13.1069	14.23	12.7093	15.3602	15.3358
MT2A	AT3G09390	AT3G09390	12.6443	11.6616	11.0082	16.117	16.5155	15.5393	14.361	14.3109	13.6564	10.9669	12.4029	10.2819	15.2986	13.5809	13.3432	12.8551	13.2986	12.8222	10.4762	11.6128	10.5657	13.6129	12.4081	13.8933	13.8684	14.0141	12.4305	14.5212	13.6908	14.8197	15.4548	16.0148	17.2573	13.8534	14.3445	14.815	12.2301	11.0636	11.9622	13.7763	14.625	14.0511	14.086	12.3478	13.4519	10.2394	11.0922
PSBX	AT2G06520	AT2G06520	15.1829	15.3056	15.3232	12.3064	12.7044	12.1832	13.4543	12.3762	14.3127	15.6755	15.7189	15.3519	13.6978	14.568	13.5885	14.181	14.0802	13.9027	15.2917	15.1302	15.2518	13.4553	14.4716	13.5801	14.3012	13.111	14.0167	14.9383	15.0944	14.3314	12.2082	12.1493	10.0988	14.91	15.0243	14.5869	15.1939	15.2088	15.2352	14.4552	13.859	14.0122	14.0493	14.3695	13.867	15.2469	15.7211
AT2G25510	AT2G25510	AT2G25510	15.7321	15.3277	14.2477	16.001	16.0449	15.7502	15.2819	14.6861	15.4915	14.6456	14.3467	14.7452	15.8298	15.0286	14.3031	13.5743	15.437	13.3856	13.84	14.1457	14.0597	15.5104	13.1676	15.3302	15.8746	14.9402	13.1699	13.5278	13.1953	13.2351	13.1005	13.1877	10.9188	13.1834	13.3325	12.9924	15.2324	14.285	15.3812	14.0406	15.2247	14.5429	14.3657	14.9879	13.9022	12.1122	13.3459
PSBO1	AT5G66570	AT5G66570	15.2256	15.2379	15.1326	12.3298	12.8284	12.5748	13.745	12.7413	14.2305	15.429	15.5526	15.1454	13.0169	13.7292	13.0696	13.6644	13.6812	13.6218	15.1593	14.9451	14.9165	12.822	13.5803	12.9084	13.9271	12.622	13.5302	14.6757	14.9528	14.2524	11.5693	12.0289	10.3666	14.758	14.7656	14.5675	15.3235	15.2959	15.2157	14.109	13.5734	13.6782	14.0431	14.4603	13.892	15.2691	15.5811
PSAK	AT1G30380	AT1G30380	15.0094	15.1182	15.3076	10.7375	11.2802	11.2227	12.0986	11.6709	14.0222	15.5355	15.5315	15.3531	12.4718	13.5333	12.7411	13.0373	13.4833	12.6439	15.1086	14.9342	15.0059	12.2578	13.3972	12.2935	13.7849	12.1044	13.1068	14.2293	14.8189	13.5323	10.4305	11.0224	9.42631	14.4987	14.4553	13.8461	14.9744	15.0977	15.0892	13.9761	12.9509	13.2861	13.0603	14.1271	12.8076	15.0384	15.4839
PSBW	AT2G30570	AT2G30570	15.0261	15.0554	15.0924	12.3984	12.8643	12.4409	13.0516	12.3591	14.0649	15.6995	15.8083	15.3341	13.3957	14.0982	13.2744	13.3274	13.7731	13.0416	15.3674	15.2215	15.2578	13.0155	13.7565	13.116	14.1125	12.5967	13.2696	14.6725	15.0624	14.0521	11.9302	11.9753	10.3986	14.8005	14.855	14.4111	14.8436	14.775	14.7933	13.9461	13.2072	13.3183	13.256	13.8664	12.7292	14.7359	15.2337
LHCB2.2	AT2G05070	AT2G05070	14.8341	14.9858	14.8663	10.405	10.748	10.9309	11.9778	11.669	14.0622	15.0629	15.0781	15.1173	12.2699	13.3996	12.8706	12.8856	13.2209	12.2589	14.7467	14.3499	14.8618	11.8757	12.9186	11.9635	13.3042	11.3764	12.5909	14.7485	15.2867	13.8217	9.76803	10.5896	8.90979	14.8738	14.8695	13.9939	15.3104	15.2799	14.9303	14.0123	13.5105	13.5683	13.1818	14.2562	12.7764	15.1696	15.4066
LHCA2	AT3G61470	AT3G61470	15.1917	15.2903	15.0606	11.8759	12.2889	12.1478	13.6251	12.6738	14.3454	15.55	15.6339	15.1681	13.1098	14.0487	13.4089	13.8925	13.828	13.7808	15.3129	14.9848	15.0985	13.1955	14.1439	12.9943	13.9949	12.792	13.6731	14.4644	15.0521	14.034	11.2318	12.1826	10.8896	14.9235	14.7159	14.5613	15.205	15.2108	15.1391	14.2112	13.6942	13.8027	14.0142	14.4792	13.968	15.1816	15.4757
psaB	ATCG00340	ATCG00340	14.6033	15.3921	14.5945	11.7717	11.5871	12.5079	12.0998	11.8895	14.1788	15.1335	15.1017	15.1391	12.6268	12.9051	12.693	13.2586	13.7812	12.519	14.8143	15.1975	14.7488	12.3754	13.4681	12.2696	13.4267	12.4291	12.4148	14.3768	14.6307	14.0334	12.1304	12.5222	12.3804	14.8579	14.1462	14.3207	14.9765	15.114	14.6118	13.6074	13.3403	13.6051	13.4593	14.6092	12.5118	15.6852	14.5089
PSAO	AT1G08380	AT1G08380	14.6362	14.7873	14.7582	10.9809	11.5448	11.5385	12.2967	11.6261	13.7027	15.6194	15.6717	15.2524	12.992	13.8065	12.8663	13.0867	13.4866	12.7105	15.2515	15.1185	15.19	12.7382	13.3927	12.7095	13.9856	12.2743	12.9875	14.6048	14.9578	14.096	10.9593	11.2566	9.99807	14.6461	14.7202	14.0853	14.8005	14.8153	14.7508	13.7706	13.0491	13.2178	12.8294	13.8553	12.633	14.8822	15.3089
FBA2	AT4G38970	AT4G38970	14.878	14.9382	14.4853	11.7266	12.1289	11.8747	13.4454	12.0617	13.5465	15.0606	15.2032	14.6873	12.9033	13.6063	12.8466	13.9048	13.8064	13.7206	14.7838	14.6965	14.4155	12.8343	13.5376	12.7815	13.9386	12.8145	13.8082	14.9085	14.6294	14.2763	11.9728	12.372	10.3339	14.6768	14.7377	14.202	15.258	15.2135	15.0257	14.1102	13.6979	13.6651	14.3449	14.5001	14.242	15.3268	15.5814
PSBP-1	AT1G06680	AT1G06680	14.954	15.0468	14.9532	11.4791	12.0881	11.6157	13.1176	12.0703	13.8524	15.5033	15.5245	15.2023	12.8619	13.7317	12.9062	13.3728	13.4972	13.1399	15.1579	14.9231	15.0503	12.7128	13.6753	12.6117	13.8057	12.3172	13.3115	14.3992	14.908	13.9042	10.9406	11.3021	9.88697	14.687	14.657	14.1003	14.9726	14.9795	14.9254	13.9043	13.1565	13.4135	13.416	14.0699	13.3407	15.0824	15.394
AGP15	AT5G11740	AT5G11740	13.5377	13.9916	13.7187	12.2539	12.156	12.3718	11.2412	10.781	12.6656	15.3196	15.4894	14.0809	13.9985	14.2926	13.6949	14.6123	14.2707	13.6724	15.2275	15.8849	14.0586	12.876	15.0329	12.8385	14.2124	13.7209	13.7972	12.4989	12.6496	11.7245	12.4375	12.5766	14.2962	12.2406	12.424	12.7936	12.8764	13.2013	13.1086	12.6806	12.2999	12.1861	12.4789	12.6058	12.3686	13.2511	13.7092
CA1	AT3G01500	AT3G01500	14.5206	14.7172	14.4826	7.28907	7.98546	10.0007	10.5765	9.3282	13.0005	14.8287	14.7642	14.5524	10.9461	12.0698	11.0745	11.8099	12.0482	11.3831	14.3651	14.3338	14.1376	10.753	11.7643	10.9523	12.3545	10.6934	11.3826	13.2018	14.2047	11.983	7.26571	6.63129	8.3956	13.9395	13.683	12.8487	14.632	14.9457	14.7592	13.2009	12.3587	12.5998	12.7673	13.9331	12.6704	15.3652	15.6217
GAPA	AT3G26650	AT3G26650	15.2727	15.2781	14.9953	12.3482	12.4852	12.3833	13.6319	12.6529	14.1565	14.8444	14.7405	14.6942	12.9678	13.6498	13.1442	13.2895	13.3793	13.1898	14.1824	13.9327	14.0674	12.9341	13.3413	12.9822	13.2118	12.1992	13.0264	14.1276	14.2637	13.6774	11.5502	11.4464	9.82657	14.0676	14.1123	13.547	15.1283	15.2273	15.2216	14.4256	13.9388	13.9756	14.1941	14.4948	14.0189	15.2931	15.384
LHCB4.1	AT5G01530	AT5G01530	14.8267	15.0453	15.0018	11.4882	11.9406	11.9099	13.1263	12.4038	13.9678	15.4047	15.3579	15.0655	12.9796	13.7994	13.2529	13.5297	13.6091	13.2655	15.1719	14.8408	14.992	12.845	13.7806	12.769	13.8198	12.4376	13.4881	14.1501	14.5079	13.7424	11.3612	11.9076	11.3685	14.461	14.2729	13.8759	14.822	14.9333	14.8329	13.8465	13.0813	13.4273	13.334	14.1047	13.253	14.9702	15.2219
LHCB6	AT1G15820	AT1G15820	14.5801	14.8974	14.9779	9.91438	10.7747	10.8274	11.9346	11.3765	13.7162	15.3795	15.3969	15.1432	12.1897	13.5268	12.5728	13.0845	13.246	12.6703	14.9584	14.6977	14.924	12.1173	13.3364	12.2002	13.5472	11.8571	12.8609	13.9318	14.7234	13.027	9.57633	10.2146	8.64249	14.3503	14.2221	13.2327	14.6153	14.7624	14.612	13.3805	12.7558	13.0207	12.6029	13.6497	12.4016	14.737	15.0233
PSAE-1	AT4G28750	AT4G28750	15.0006	14.9505	14.8633	11.4095	11.8983	11.8932	12.8989	11.7283	13.7946	15.3099	15.4806	14.9908	12.6894	13.573	12.6875	13.1523	13.3917	12.8705	15.0746	14.8593	14.8996	12.5222	13.6496	12.4461	13.7323	12.3359	12.9823	14.2523	14.6147	13.7425	10.8021	11.4622	10.6483	14.2819	14.3505	14.2014	14.6336	14.6301	14.5646	13.5971	12.866	13.0166	13.1286	13.7461	12.8826	14.6748	15.1185
TCTP	AT3G16640	AT3G16640	15.5148	14.9799	14.8102	14.5716	14.566	14.3983	14.7646	14.9195	14.5151	14.6797	15.0437	14.578	14.5003	14.2323	14.2571	14.7645	14.2418	14.6592	14.3651	14.6748	14.7367	14.0665	14.4208	13.9811	14.2572	14.0923	14.4817	15.3096	15.3243	15.6614	13.4416	13.8341	12.7407	14.8982	15.1587	15.4737	14.3092	14.2986	13.9951	13.8904	13.7156	13.836	13.9466	13.8266	14.0187	14.2126	14.2806
PSAD-1	AT4G02770	AT4G02770	14.3314	14.6973	14.5204	10.8897	11.2614	11.4118	11.977	11.5508	13.5432	15.2016	15.1206	14.9711	12.4318	13.2802	12.5499	12.9386	13.4249	12.3706	15.0497	14.7555	14.9675	12.3549	13.274	12.351	13.6632	12.054	12.7558	14.1944	14.7	13.852	11.3852	11.6487	9.50916	14.5584	14.359	14.0563	14.4815	14.5931	14.3568	13.4042	12.7178	12.8826	12.8646	13.6355	12.266	14.6427	14.7436
PIP2A	AT3G53420	AT3G53420	15.1862	14.942	14.2376	15.0657	15.3737	13.7875	13.85	13.1872	13.4905	14.4895	15.0695	13.7636	13.4721	13.5966	12.7224	13.4942	12.781	12.9965	15.2399	15.3007	14.719	12.7561	13.9559	12.8986	14.0275	12.8863	13.0153	14.9017	14.773	14.2666	13.4427	13.1236	10.4774	14.3538	14.8113	14.0376	14.8848	14.492	14.7082	14.1964	13.6464	13.4259	13.404	13.1918	13.2475	14.2233	14.6351
AT2G10940	AT2G10940	AT2G10940	13.8265	14.732	14.6155	5.18079	4.92861	7.86983	8.86561	9.9324	12.5964	14.2619	12.8711	13.9963	7.73551	11.1525	11.2235	12.1506	10.5935	10.9225	14.0476	13.4298	13.8986	9.26602	12.0212	10.0607	10.0564	8.6889	12.2024	8.19096	12.2122	4.62435	5.63457	4.38173	6.84451	11.6632	10.3948	7.63519	13.9296	15.1288	14.527	12.2033	9.96778	11.8444	11.0261	13.2929	11.0972	14.7771	14.8711
LHB1B1	AT2G34430	AT2G34430	13.8816	14.4416	14.6468	8.31178	8.42684	9.64499	12.0952	10.73	13.6205	15.0147	14.8283	14.5232	11.193	12.6702	12.2352	12.2037	12.2819	12.1271	14.6334	13.3487	14.7456	11.424	12.5345	11.4169	12.3576	11.2806	11.4736	10.1193	12.7882	9.71194	7.60942	7.51857	8.09756	11.0123	10.8525	10.3476	13.8784	14.7529	13.8639	13.2527	12.4899	12.7396	13.4562	13.7518	12.483	14.4616	14.8552
TIP2	AT3G26520	AT3G26520	14.1049	14.2716	14.2939	13.6657	13.7162	12.9641	13.2162	12.2634	13.146	14.5728	14.8723	14.3992	13.1309	13.4727	12.8789	13.5957	12.9297	12.9529	15.0952	15.182	14.6898	12.6766	14.328	12.3673	13.9284	13.1026	13.5573	12.3159	12.4696	10.9905	10.6373	10.362	8.4727	12.0104	12.2415	10.3013	13.5169	14.2103	14.0984	13.6406	13.0086	13.0368	13.1247	12.8272	12.9963	14.2691	14.4045
rpl32	ATCG01020	ATCG01020	15.3301	15.0881	15.4263	13.1156	13.6092	13.4156	13.6408	13.5623	14.8105	15.248	15.2386	14.9782	13.5366	13.4105	13.4529	13.9409	14.09	13.6987	14.8545	14.6192	14.6829	12.7616	13.9559	12.6626	14.0741	13.3535	13.7419	14.3333	14.354	14.422	11.6864	13.328	12.5501	13.9283	14.132	14.5264	13.8678	13.8893	13.9349	13.2608	12.7048	12.5818	13.0749	13.506	12.8601	13.729	14.57
LP1	AT2G38540	AT2G38540	13.6092	13.5904	14.3511	10.8213	11.8348	10.0427	10.871	12.0257	12.8847	14.5303	13.7508	14.2928	11.9398	13.2125	13.2425	13.7148	13.2588	13.2475	14.1919	13.6272	14.5337	11.1669	13.9821	11.6518	13.145	11.5335	14.0187	14.6905	14.5626	13.9877	12.7323	12.9276	10.3666	14.2836	14.7575	15.1955	14.0749	14.2893	14.2852	14.0233	12.4014	12.9735	12.9702	13.5579	12.9274	13.9492	14.3884
ndhC	ATCG00440	ATCG00440	14.1933	14.6343	14.1967	10.9821	10.8252	12.3497	12.1622	11.2347	13.2107	14.5558	14.9991	14.3475	12.2051	12.0259	12.5167	12.9693	13.36	12.2	14.4755	14.8814	14.3339	11.6923	13.2591	11.6381	13.5805	12.3367	12.2633	14.4504	14.4818	13.9306	10.1297	11.6752	9.17267	14.4833	14.1609	14.2529	14.4844	14.0058	13.7272	12.6041	12.6417	12.4023	13.0493	13.4783	11.8266	14.1876	14.0313
DELTA-TIP	AT3G16240	AT3G16240	15.0597	15.3959	15.0922	11.4359	11.9301	11.1845	11.7001	10.4799	13.2314	14.589	14.0814	13.93	11.2035	12.6133	12.5465	12.3735	11.7922	11.1225	14.2976	13.9177	14.135	10.6525	13.0545	10.7622	11.9096	10.6288	11.796	9.98356	11.7053	8.87466	8.23322	7.26337	6.82112	10.612	10.6795	9.85217	12.9539	14.787	14.3452	12.8709	12.1588	12.1895	12.0425	12.5951	11.8467	14.1717	14.6723
AT2G45180	AT2G45180	AT2G45180	15.0593	15.3158	14.3404	9.53659	9.15229	10.6631	11.4227	9.74179	12.7506	14.6322	14.8949	14.1605	12.5938	13.5095	12.7353	12.9292	12.5589	11.551	14.6	14.4043	14.2361	12.1058	13.0643	12.1783	13.1463	11.0249	11.7758	12.8033	13.2641	12.853	8.1559	8.29085	8.09756	12.4807	13.2722	10.927	14.3104	14.3972	14.1593	13.0841	12.5101	12.4213	12.1169	12.801	11.8461	14.4963	14.9734
APE2	AT5G46110	AT5G46110	14.4139	14.5346	14.2771	12.4208	12.6238	12.0071	13.19	12.1384	13.664	14.4492	14.7318	14.2992	13.0059	13.4001	12.9026	13.0841	13.0778	12.8364	14.2688	14.0089	14.148	12.687	13.2108	12.5694	13.192	12.0381	12.5745	13.9205	14.2465	13.7445	11.3627	11.8557	8.76403	14.0443	14.0411	13.491	14.8472	14.7732	14.8027	14.13	13.4791	13.6954	13.729	13.9551	13.492	14.7899	14.8163
FBA1	AT2G21330	AT2G21330	14.7706	14.5813	13.8913	11.2834	11.7637	11.1669	13.108	11.2423	13.0207	13.9138	14.1892	13.3691	12.2992	13.0271	11.936	13.4364	12.7161	13.4115	13.1815	13.3152	13.1642	12.0333	12.6028	11.9619	12.8879	12.0254	13.3391	14.7338	13.9454	14.2718	11.5419	12.0327	9.46456	13.943	14.44	13.7534	14.8604	14.4338	14.5578	13.6473	13.3225	13.1701	13.8682	13.8782	13.9851	14.3828	14.9256
HOG1	AT4G13940	AT4G13940	12.27	12.5863	13.7657	13.0322	12.915	12.4868	13.7804	13.7222	13.1027	12.554	11.9931	12.4894	13.2276	13.331	13.6491	14.0047	13.5128	14.2572	12.6845	12.6105	12.5334	13.096	13.8171	13.0007	13.6439	13.2433	14.521	12.4072	11.849	12.2141	12.4889	13.0349	12.6402	11.7736	12.1329	12.4891	12.3416	13.176	13.1708	13.7602	13.1986	13.7415	13.5801	13.7924	14.4921	12.9163	12.8291
PSAH2	AT1G52230	AT1G52230	14.2443	14.4697	14.4697	10.8733	11.3838	10.829	11.9349	11.064	13.1917	14.7995	14.8076	14.6049	12.3636	13.2062	12.3392	12.7857	12.8317	12.3198	14.5051	14.221	14.4864	11.8959	13.0081	11.9334	13.2283	11.7535	12.5445	13.717	14.1249	12.7129	9.6829	10.4607	8.81822	13.7934	13.8442	13.0643	14.3767	14.447	14.3669	13.5046	12.8385	12.9877	12.8448	13.5061	12.553	14.4687	15.0032
PSBY	AT1G67740	AT1G67740	13.9583	14.1791	14.0917	11.4563	11.5228	11.4435	11.8672	11.2882	13.1365	14.4993	14.4647	14.3372	12.1083	12.6805	12.2509	12.3588	12.8453	11.9497	14.273	13.9671	14.1715	11.9462	12.6322	11.992	13.0269	11.5614	12.1121	13.5636	13.9211	12.6574	10.9364	10.9799	9.02178	13.8028	13.6704	12.8206	14.5468	14.649	14.5276	13.4687	12.8822	13.0279	13.107	13.7074	12.7136	14.769	14.942
CA2	AT5G14740	AT5G14740	14.9749	14.9004	14.5897	9.56076	9.86974	10.7107	12.8572	10.754	13.6426	14.6535	14.7505	14.2569	12.0884	13.2582	12.2272	12.6502	12.1426	12.7408	13.3956	13.079	13.4455	11.9638	12.8207	11.8773	11.5662	10.8806	12.262	12.9064	13.7102	12.7855	7.96305	8.34901	8.29729	12.965	13.2782	12.0888	14.3195	14.7614	14.7455	13.6134	12.9269	13.0611	12.914	13.6684	13.2321	14.461	15.0056
PSBTN	AT3G21055	AT3G21055	14.2792	14.5106	14.7903	10.642	11.2447	10.7055	12.0401	11.1	13.3495	15.0596	14.9574	14.7927	12.2502	13.1726	12.2834	12.7593	12.7621	12.3969	14.7249	14.3224	14.6286	12.0539	13.0456	12.0001	13.1132	11.5138	12.7206	13.2575	14.0433	12.6187	9.71266	10.0436	8.52432	13.6479	13.596	12.8591	13.674	13.9123	13.9199	12.7589	11.8612	12.2944	12.0957	12.8742	11.9187	14.0307	14.4686
GAPA-2	AT1G12900	AT1G12900	13.6227	13.9471	13.9702	9.26953	9.85804	9.57805	11.2153	9.95945	12.3451	14.2781	14.0365	13.9073	10.8902	11.962	11.2684	11.6167	11.5569	11.2352	13.9372	13.5569	13.6642	10.6696	11.8302	10.4817	11.9168	10.1377	11.5113	12.5914	12.8667	11.877	9.32341	9.72844	9.14938	12.6655	12.6896	11.7125	14.3333	14.6791	14.5116	13.0953	12.0414	12.49	12.4188	13.4635	12.718	14.6693	14.9356
PSBQA	AT4G21280	AT4G21280	14.1632	14.5212	14.7291	10.1328	10.6631	10.2881	11.8962	11.0271	13.2632	14.8628	14.6244	14.6619	11.7189	12.7881	12.2442	12.5763	12.5845	12.2849	14.4308	14.0496	14.3042	11.6092	12.6595	11.505	12.7903	11.1245	12.6502	13.0299	13.7153	12.0594	9.21669	9.67871	8.12648	13.5445	13.3013	12.4218	13.937	14.3323	14.3127	13.1863	12.0008	12.5781	12.2288	13.2142	12.406	14.5247	14.74
PCC1	AT3G22231	AT3G22231	14.3714	14.3012	13.7173	12.0236	11.9012	11.8186	12.4906	11.437	14.4052	14.4189	11.7866	13.8642	13.5525	13.0532	13.4029	12.7532	14.7213	11.5851	13.2531	12.6069	13.6901	14.3409	11.8468	13.3349	14.8852	13.8448	11.7423	9.39101	12.5976	7.54908	7.89546	8.50275	7.79537	10.6218	9.37506	9.44096	13.528	13.5439	14.228	11.0939	13.3481	12.6875	11.988	14.918	11.4766	9.82977	12.5288
PSAN	AT5G64040	AT5G64040	14.6143	14.4732	14.4993	10.6142	11.2037	10.4958	12.0742	11.5267	13.2082	14.951	14.9262	14.4789	11.7731	12.7323	11.827	12.052	12.3631	11.6617	14.4383	14.1618	14.3816	11.4911	12.435	11.5962	12.5761	10.7814	11.9714	13.3058	13.8129	12.7125	9.8859	9.98131	8.53155	13.5741	13.5231	12.5845	14.1779	14.0984	14.0164	12.839	11.8446	12.1702	12.0876	13.0769	11.9312	14.2232	14.6867
ATCG00920	ATCG00920	ATCG00920	13.7485	15.0211	11.4785	12.101	10.8386	11.6809	10.8911	12.4926	12.1708	13.7535	12.4256	13.924	11.8169	10.5967	11.0378	12.7589	12.4736	10.9013	13.0349	14.914	13.3768	11.4132	10.6833	10.2527	13.6062	12.0879	9.93264	12.3217	13.31	12.5543	10.9468	11.2012	15.9896	13.1467	11.4746	12.8141	10.9606	11.0056	10.7142	10.4733	9.5612	9.44839	13.9565	10.8847	7.97996	10.9485	10.1359
ATCG01210	ATCG01210	ATCG01210	13.748	15.0207	11.478	12.101	10.8386	11.6809	10.8911	12.4916	12.1713	13.7535	12.4245	13.9235	11.8169	10.598	11.0395	12.7589	12.4731	10.9008	13.0348	14.9137	13.3765	11.4132	10.6833	10.2544	13.6058	12.0887	9.93109	12.3214	13.3092	12.554	10.9468	11.2006	15.9892	13.1467	11.4765	12.8138	10.9583	11.0036	10.7122	10.4733	9.5612	9.44428	13.9561	10.8842	7.97695	10.9458	10.1343
LHCB4.2	AT3G08940	AT3G08940	14.2093	14.3419	14.0974	10.3525	10.8855	10.745	12.4107	11.7367	13.3927	14.455	14.6406	14.3792	11.6911	12.7135	12.0824	12.3032	12.6541	12.1304	13.7944	13.5545	14.0137	11.5461	12.3474	11.5496	12.6069	11.0019	11.9541	13.8294	14.5748	13.312	9.98271	10.3793	8.75789	14.1488	14.0792	13.5372	14.4266	14.2577	14.0197	13.127	12.4715	12.6135	12.3561	13.2709	12.1268	14.3352	14.5658
KIN2	AT5G15970	AT5G15970	11.4107	10.7223	11.7017	10.492	9.44995	11.3641	9.45396	11.2508	12.144	13.2712	13.8568	12.3855	10.3683	9.95638	8.53512	10.5781	10.8427	10.4424	14.8801	14.9313	13.612	9.86615	12.5397	9.73031	12.0595	11.2431	12.4908	12.8128	13.5008	13.1756	9.49018	10.0504	8.34728	13.2315	13.2051	13.8102	10.7265	10.2649	10.3902	9.23931	9.15544	8.42779	9.7365	10.1461	8.37257	9.3629	9.61216
PSBQ-2	AT4G05180	AT4G05180	14.2685	14.2794	14.0314	10.2479	10.8327	11.0835	12.259	11.4473	13.2102	14.6713	14.9405	14.4093	11.8383	12.8958	11.7745	12.356	12.6688	11.9519	14.4464	14.211	14.3374	11.8942	12.8141	11.8453	12.9037	11.5254	11.8805	13.5779	14.1606	13.4167	9.8551	10.3544	8.64249	13.8352	13.7254	13.2606	14.1187	13.9789	13.8228	12.6331	12.1734	12.1926	12.5355	13.0117	11.7198	14.089	14.4645
ELP	AT1G12090	AT1G12090	11.6985	12.6582	12.2613	7.07555	6.64921	8.08869	8.50914	10.022	11.1883	13.885	13.3839	13.2268	10.4999	12.2745	11.7238	12.603	11.0572	11.8048	14.347	14.1775	14.0696	10.8845	13.1464	11.2147	12.1962	10.6865	12.634	13.4677	14.2001	13.3473	7.5557	9.23017	8.45761	14.0328	13.9227	13.9848	14.1546	14.1997	13.8537	12.4846	11.2194	11.6341	11.505	12.9742	11.0713	13.9482	14.3854
UBQ3	AT5G03240	AT5G03240	10.6699	10.1918	9.86005	13.0185	12.955	12.7374	14.3983	14.164	12.6495	9.05656	9.59063	9.267	12.6292	12.6104	12.5043	14.1131	13.036	14.2225	9.9069	10.2276	9.99962	13.2065	12.4391	13.2434	13.2459	13.5203	13.7219	11.3191	10.6086	12.3964	12.7213	13.4825	14.2826	10.7547	10.9437	11.9554	10.3915	9.47228	9.81472	12.0997	12.6891	12.2571	13.2757	12.5818	13.5569	9.33516	9.53806
PSI-P	AT2G46820	AT2G46820	13.9589	14.1165	13.8012	10.0693	10.3716	10.4632	11.2751	10.3317	12.6799	14.5081	14.7603	14.0189	11.2035	11.8688	11.3452	11.6544	12.2614	11.2632	14.17	14.0088	13.9559	10.9578	11.9204	11.0472	12.7452	10.9056	11.6245	13.7241	13.9709	12.9247	9.96014	10.3782	8.81822	13.686	13.7483	13.1694	14.2773	13.9394	13.7961	12.4527	11.7271	11.8477	12.0969	13.1214	11.7162	14.1165	14.342
PSAH-1	AT3G16140	AT3G16140	14.045	14.2024	14.0319	10.9949	11.2525	11.2142	11.7071	11.2849	13.1261	14.5685	14.7238	14.2662	12.2151	12.804	11.9965	12.6379	12.8236	12.1447	14.3984	14.236	14.1749	11.8712	12.821	11.9671	13.0696	11.7088	12.3496	13.8122	14.134	13.3902	10.3696	11.0869	8.84746	14.0587	13.8564	13.8899	14.0174	13.9549	13.8606	12.8424	12.2369	12.3399	12.4169	13.1267	12.0795	14.1256	14.4062
NPQ4	AT1G44575	AT1G44575	13.9709	13.9416	13.7782	10.8468	11.4985	10.7433	11.6424	10.8065	12.5154	14.3656	14.3475	13.9406	11.8685	12.6738	12.0216	12.6771	12.5091	12.3483	14.1806	14.0745	13.8258	11.8592	12.6777	11.9075	12.9082	11.3598	12.678	14.2215	14.1526	13.504	11.6394	11.8923	9.91211	14.3808	14.2688	14.071	14.0213	13.8966	13.9419	12.9547	12.1955	12.4763	12.4767	13.0882	12.6406	14.1468	14.5325
GAPB	AT1G42970	AT1G42970	14.2078	14.2283	13.8915	10.791	11.1398	10.9249	12.428	10.7031	12.6863	14.1024	14.2368	13.7497	11.9704	12.7887	12.2363	12.6708	12.437	12.5728	13.7763	13.8103	13.4375	12.0241	12.8134	12.0093	12.7024	11.5548	12.6102	13.7493	13.5109	13.3801	10.9676	11.2443	8.98013	13.5579	13.6544	13.2595	14.4024	14.3177	14.3512	13.569	12.6995	13.2394	13.3595	13.5855	13.6789	14.4611	14.6098
AT1G09310	AT1G09310	AT1G09310	13.5276	13.2094	12.5791	8.31178	9.07352	9.39136	9.8028	10.0081	11.6993	13.3843	13.6571	12.7935	10.3007	11.5794	11.996	12.4998	12.0406	12.1186	12.837	12.5536	13.1983	9.84555	12.5283	10.399	12.1652	10.6197	11.956	14.5669	14.2886	13.3489	10.5356	10.1669	7.92174	14.1924	14.7248	14.535	14.1694	13.2488	13.2628	12.7576	11.8574	12.0525	12.6898	12.8999	12.2293	13.2565	13.9593
CRD1	AT3G56940	AT3G56940	14.3668	14.4321	14.3875	10.9961	11.0932	11.3135	13.1478	11.9458	13.4016	14.3366	14.3276	14.2066	12.1639	13.0229	12.7374	13.4558	13.0176	13.447	14.0687	13.9209	14.012	12.2421	13.0451	12.0409	12.9216	11.8525	13.3251	14.0028	13.937	13.5153	10.834	11.6407	10.483	13.921	13.9475	13.4066	14.1125	14.3385	14.1201	13.3518	12.4988	12.9571	12.9727	13.5815	13.177	14.3165	14.4759
LHCB2.3	AT3G27690	AT3G27690	13.2582	13.702	13.497	6.02145	6.27977	8.46313	8.88355	9.56611	12.3913	14.1593	13.9095	14.1046	8.51963	10.5017	10.2052	10.4089	10.913	9.37565	13.6438	13.0036	13.6679	8.38729	10.2917	8.90769	11.427	8.93413	10.2781	11.3841	13.7735	8.77758	6.23599	5.66036	7.3649	13.1358	12.4423	10.0167	14.0433	14.2683	13.5479	12.1996	10.9073	11.7684	10.857	12.9621	10.2414	14.4544	14.6977
LOX2	AT3G45140	AT3G45140	9.52286	9.80143	9.96244	10.574	10.1758	10.5375	9.89632	8.73172	10.2978	13.188	14.2076	13.173	11.7806	11.1809	10.4577	11.8161	12.0145	11.8227	14.7528	14.6565	14.2484	12.2089	13.9727	11.4731	13.4576	13.1164	12.6883	10.6367	11.6967	8.8719	8.78401	9.23492	8.26297	12.0326	10.9156	9.63016	11.7535	10.143	10.5928	11.4887	11.8312	11.4545	10.9486	10.5303	10.4755	10.8243	11.1662
ATCG01050	ATCG01050	ATCG01050	13.2643	13.5356	14.0606	13.2288	13.026	13.2821	13.253	12.7162	13.423	14.7403	14.3208	13.9748	13.7786	13.4948	13.0964	14.1168	13.6652	13.3792	14.1418	14.5132	14.3978	12.596	14.3837	12.9512	13.4184	13.1453	13.4233	14.2574	14.0329	14.482	11.029	12.5314	11.736	13.4455	14.0831	14.2703	13.4539	13.0738	13.2306	13.4127	12.6361	13.0344	12.9314	13.0522	12.1927	13.4292	12.981
THI1	AT5G54770	AT5G54770	14.0341	13.6629	13.5331	12.5771	12.8922	12.4151	12.9001	11.7439	12.8212	13.8425	14.2491	13.539	13.1556	13.4343	12.9663	13.4616	13.0455	13.0241	13.7682	13.8366	13.5573	12.8013	13.3507	12.9141	13.5363	12.2842	12.8434	14.5934	14.0627	14.4811	12.472	13.4289	10.7755	14.0904	14.5222	14.3319	14.395	13.6505	14.0969	13.5754	13.4045	13.318	14.1006	13.2564	13.509	14.0345	14.2585
AGT	AT2G13360	AT2G13360	14.2922	14.1119	13.3989	12.1845	12.5027	12.1567	12.6528	12.2322	13.0408	13.6465	13.958	13.1546	12.3744	12.8953	11.9211	12.0339	12.1902	12.0792	12.8502	12.8283	12.888	12.2857	11.9307	12.5452	12.1987	10.9639	11.526	14.6561	14.1573	14.4599	12.9894	12.3851	10.575	14.3169	14.4283	14.1433	14.1696	13.6663	13.8124	12.9212	12.5034	12.3715	12.5427	12.852	12.4544	13.5553	13.7695
MT2B	AT5G02380	AT5G02380	14.0943	13.7954	13.4842	14.5676	14.5743	15.034	13.4763	13.2761	13.2758	13.8152	14.3859	13.3931	14.2609	13.9148	14.0287	13.1648	13.3169	12.779	13.6727	14.003	13.1689	13.8336	13.4678	14.2821	13.7836	13.3278	12.7681	14.8866	13.9542	14.3341	15.0524	14.1257	13.0505	14.4015	14.8488	14.2798	14.6781	13.431	13.6216	14.1724	14.0435	14.1743	13.5237	13.2515	13.2045	13.6779	13.7548
AOS	AT5G42650	AT5G42650	10.4761	10.2815	8.50022	9.39008	9.52217	10.3762	9.88746	8.93829	8.95784	13.7159	14.7366	13.0143	10.9812	9.68813	9.54691	11.6068	11.8491	11.5895	14.4721	14.6372	13.5448	11.586	13.487	10.7766	13.46	12.9698	12.2009	11.3837	11.2948	10.9821	9.03233	9.86194	8.54589	11.0742	10.8087	10.4891	11.2341	9.74599	9.65296	9.87945	10.1809	9.47414	10.408	9.44486	9.21203	9.84374	10.3226
atpB	ATCG00480	ATCG00480	13.0593	13.0811	12.8996	10.2243	10.2671	11.0942	10.9185	10.4727	12.2036	13.462	13.537	13.0753	11.0128	11.2053	11.1621	11.6194	12.0737	11.0898	12.9693	13.4041	12.8315	10.8331	11.6825	10.3471	12.1154	11.0116	11.193	12.5333	12.8165	12.242	9.6319	10.5634	9.43404	12.8095	12.5967	12.4586	14.1852	14.4139	14.0108	13.0583	12.8875	13.0212	13.2389	13.7241	12.3301	14.4301	14.6723
ERD14	AT1G76180	AT1G76180	12.9261	12.3256	11.9761	14.1721	14.2171	14.5337	13.1438	13.844	12.9685	13.7983	14.4713	13.0522	13.0739	12.3423	12.0745	12.5315	12.8449	12.5898	13.1865	13.4253	12.924	12.4934	12.2915	13.2827	12.409	12.7754	11.9732	14.3815	14.3022	14.4283	13.2396	12.9679	12.6461	13.7736	14.1133	14.9665	12.6299	12.3768	12.3727	12.0759	12.5421	11.8665	12.5595	11.5993	11.3409	11.4955	11.9207
GRP-3	AT2G05520	AT2G05520	14.0925	13.2885	13.169	14.5688	15.0043	13.2618	13.0036	12.4733	12.9791	11.7958	12.6421	11.67	14.1864	13.2395	13.6752	11.887	12.0017	11.5685	11.6158	11.491	11.8926	12.5885	12.6263	12.5441	12.621	11.845	11.5421	13.7506	13.3532	14.8805	14.7955	14.3291	14.2768	13.0865	13.6789	14.3669	13.3461	12.0561	12.9774	14.1717	13.8521	13.7093	12.4272	12.4663	12.3688	10.9235	11.0132
MT3	AT3G15353	AT3G15353	14.2399	13.8413	12.9798	13.9125	13.9792	14.4226	13.3812	12.9312	13.11	13.5415	14.5087	13.4417	13.5321	13.0047	12.5754	12.9539	13.1239	12.2366	13.1441	13.601	13.0562	12.7677	12.4222	13.3458	13.3027	12.7611	11.6727	14.7494	13.8685	14.6437	13.0411	13.083	10.8322	13.6781	14.5733	14.0906	14.4256	12.8918	13.0373	12.6506	13.5154	12.593	13.509	12.953	12.2325	13.1441	13.9109
PRXR1	AT4G21960	AT4G21960	13.2551	12.7394	11.9229	9.44307	9.41044	10.7433	12.6932	12.5753	12.489	12.3494	13.0927	12.2301	10.8922	11.9023	12.1992	13.3134	12.6874	12.9934	12.2294	12.0472	12.9427	11.5425	12.4257	11.4031	12.8546	12.163	12.7539	13.9211	14.5124	13.2213	10.6451	11.2145	8.13599	14.0046	14.1639	14.4392	13.9752	12.6623	13.0146	12.7561	12.1256	12.7385	13.5363	13.014	12.7837	12.3674	12.8938
AT5G60390	AT5G60390	AT5G60390	12.4053	12.7237	13.7827	12.047	11.8876	11.7885	12.8795	12.9564	12.5304	13.665	13.0403	13.6876	12.622	12.8125	12.9383	13.6715	13.119	13.7843	13.7787	13.6437	13.821	12.5117	13.1708	12.2729	13.0429	13.4501	14.0381	12.8812	12.6401	12.9053	12.4676	12.9427	12.525	12.9131	12.7975	12.9347	12.5126	13.7464	13.3673	12.9519	12.7372	12.8795	13.008	13.2232	14.0771	13.8104	13.5195
PIP1B	AT2G45960	AT2G45960	14.422	14.1416	13.4833	14.7292	14.6563	14.0191	13.7345	13.2766	13.2979	12.8879	13.3727	12.6876	12.794	12.6544	12.303	12.5243	12.2834	12.2179	12.8769	12.8476	13.2242	12.263	12.3447	12.4055	12.4914	11.6345	12.0522	13.5383	13.3749	13.5198	13.2219	12.8079	10.916	13.1171	13.548	13.1808	14.3911	14.2594	14.5219	13.7653	14.0826	13.3967	13.8095	13.2452	13.3764	13.7495	14.0869
AT2G26500	AT2G26500	AT2G26500	14.2854	14.1896	14.4095	12.2304	12.6781	11.4257	13.0228	12.131	13.3617	14.5498	14.469	14.2354	13.1164	13.7297	13.0805	13.0987	12.958	12.9998	14.1415	13.8827	13.9132	12.9787	13.5078	12.958	13.0443	11.8134	12.9943	13.4466	13.3221	13.3606	11.6054	11.5319	9.90099	13.4688	13.4247	12.7323	13.6489	13.9051	14.0277	13.4953	12.5746	12.9468	12.8612	13.0621	12.8252	14.0524	14.3823
rpoA	ATCG00740	ATCG00740	14.1256	14.4687	14.3696	11.5873	11.6605	12.4283	12.7802	12.3046	13.4397	14.2583	14.1716	14.2045	12.3953	12.6811	12.7734	13.6018	13.1419	13.2577	14.0797	13.7752	13.8262	12.365	13.3326	11.9264	12.8751	12.5879	13.1738	13.3197	13.8795	13.45	11.0831	12.2055	10.2749	13.7909	13.3537	13.2265	13.5135	13.984	13.6543	12.761	12.7013	12.638	13.1733	13.256	12.939	14.1048	13.809
LTP3	AT5G59320	AT5G59320	6.22914	5.51053	4.0217	10.5875	11.6038	6.33338	4.21635	5.92855	4.45956	5.24559	5.24418	4.97544	9.34378	6.35964	5.04455	5.42568	6.11249	4.67956	4.12987	5.06059	5.55489	5.18381	5.49838	6.25514	7.24676	5.77494	5.88199	12.2222	11.5078	13.9318	13.8981	13.4176	9.24038	13.0113	13.5457	14.9409	6.98807	3.49492	4.58897	3.88483	4.07927	3.49621	4.22809	4.37135	4.30688	2.24422	2.70664
ERD10	AT1G20450	AT1G20450	11.8566	11.346	9.92053	11.8197	12.03	12.14	10.4559	11.2972	10.97	14.4674	15.027	13.3147	11.7246	10.8502	10.3586	12.2156	12.5114	12.1709	13.3766	13.5516	12.6598	10.4626	12.5299	10.8497	11.7642	11.1394	11.8889	13.1636	12.8486	13.0508	11.2163	11.4064	10.5942	12.4488	12.6415	14.2446	10.7435	10.5405	10.6927	10.1256	11.0593	9.8545	10.8133	10.1002	9.55365	9.66647	9.86968
rps14	ATCG00330	ATCG00330	13.6837	14.3292	13.6392	10.9654	10.8505	11.4653	11.0107	10.9252	13.1817	14.1647	14.0635	14.0755	11.9095	11.8841	11.6328	12.1103	12.7113	11.5188	13.762	14.0227	13.6874	11.3307	12.4426	11.3287	12.4115	11.3888	11.2852	13.3436	13.5508	13.1077	10.9416	11.42	11.3286	13.7544	13.1883	13.3959	11.6659	11.7165	11.365	10.1847	10.2454	10.2303	10.3448	11.3231	9.14922	12.2806	11.4866
AT4G16980	AT4G16980	AT4G16980	14.0664	14.5536	14.2307	10.5431	10.5422	10.7194	11.184	10.293	13.0144	13.5883	13.1252	13.4211	11.9218	12.2422	12.1938	12.1478	12.0318	11.3234	13.2134	12.5351	13.4166	10.9057	11.8324	10.8486	12.022	10.5047	11.6108	9.85286	11.7297	8.86079	7.87806	7.86365	6.69808	11.229	10.7983	9.11587	13.123	14.0193	13.8472	12.5897	11.8327	12.1345	11.822	12.8591	12.0955	13.885	14.1364
HSC70-1	AT5G02500	AT5G02500	14.1274	14.2617	14.5626	12.6106	12.5782	12.6171	12.6024	12.579	13.3985	13.1748	13.4474	12.9337	12.4989	12.5035	12.6764	12.8941	12.9988	12.8485	13.6513	14.0175	13.5893	12.5465	13.2186	12.063	12.9449	12.9386	13.4619	13.8831	13.106	13.921	12.6108	12.9563	12.416	12.9456	13.2337	14.0072	13.6908	13.9343	13.7177	12.8838	12.8613	12.856	12.6254	13.8631	13.3297	13.2639	13.4477
RD22	AT5G25610	AT5G25610	12.6203	12.3324	10.6453	9.26112	9.90997	8.49574	8.99911	9.2325	10.5542	11.6314	12.418	10.7876	9.86095	10.5193	10.5333	11.1565	10.6486	10.9533	11.3823	11.7051	11.7758	8.90366	11.1106	9.43383	11.2156	9.60704	10.8128	13.7229	13.6134	13.0225	11.9051	11.136	10.4143	13.7167	14.1684	14.5513	13.4125	11.9045	12.0208	11.4688	10.4912	10.4552	10.9699	11.5439	11.0808	10.9382	11.8344
ESM1	AT3G14210	AT3G14210	13.2735	13.8317	13.5197	8.99322	8.73265	8.67015	10.5655	10.4582	11.9391	12.3285	11.9267	12.3215	9.42055	10.9575	10.4394	12.0187	10.148	11.399	13.0896	13.0365	13.2347	10.089	11.9773	10.225	11.0055	10.0363	12.3073	9.15046	11.3492	8.84678	9.19577	9.45866	7.05971	11.5404	10.3738	8.74157	14.0182	14.0409	14.0447	11.8707	10.4393	11.5346	11.2617	12.7955	11.7241	13.5425	13.7474
ARGAH2	AT4G08870	AT4G08870	10.4233	10.7341	10.7584	9.92506	9.87265	9.42561	8.69074	8.31477	9.75871	12.6664	13.5119	12.6746	11.4781	10.4574	9.76959	11.2143	11.1718	10.8895	14.1954	14.4765	13.6206	11.6872	12.9964	10.4581	13.2394	12.5077	12.144	11.5015	11.5696	10.4309	8.77463	9.31342	7.79537	12.1637	11.4231	10.6326	12.013	11.2454	11.1842	10.2584	10.7375	9.9171	9.92549	10.7549	10.0025	11.3218	11.3873
GGT1 AT1G23310	AT1G23310	AT1G23310	13.9851	13.9804	13.1738	11.5447	11.2379	11.6649	12.1316	11.44	12.9469	13.3457	13.8121	12.9762	11.9011	12.1284	11.5962	11.6461	12.4455	11.7726	12.8482	12.8708	12.7276	11.9191	11.8995	11.7387	12.207	11.1826	11.453	13.7955	13.5716	13.3874	11.0211	11.2578	9.67495	13.4783	13.6896	13.4838	14.2946	13.765	13.9436	12.487	12.7463	12.5516	12.6531	13.3455	12.4032	13.5799	13.8164
ATPD	AT4G09650	AT4G09650	13.2947	13.529	13.6786	10.0955	10.3819	9.92489	10.9486	10.0474	12.2086	13.9931	13.7994	13.6529	11.1832	11.9268	11.327	11.5155	11.7494	10.9425	13.8121	13.5548	13.6499	10.7835	11.8222	10.7294	12.2529	10.4622	11.3372	12.5529	12.778	11.877	9.98067	10.0395	8.28879	12.6586	12.6662	11.766	13.4965	13.699	13.6787	12.3977	11.4129	11.767	11.5806	12.5461	11.5349	13.7707	13.9521
ATCG00030	ATCG00030	ATCG00030	13.5335	14.0358	14.5955	9.94357	10.3571	10.5356	11.3382	11.1941	12.5496	14.2538	13.7517	14.099	11.9475	12.5325	11.831	12.8042	12.7196	12.1908	13.6711	13.4803	13.7872	11.6086	12.7768	11.6795	12.3413	11.2806	12.8051	13.0356	13.3009	13.2655	10.3445	11.0651	10.1301	12.8096	12.918	12.8987	12.6355	13.2877	13.1826	11.9585	10.7103	11.4582	11.907	12.3356	11.1967	13.4847	13.311
AT1G13930	AT1G13930	AT1G13930	11.3545	11.1786	10.9282	11.3768	12.0494	10.8685	10.2274	10.9029	10.7142	12.5294	12.9191	11.4999	12.0197	12.0217	11.4327	11.185	10.9602	10.7436	13.0506	13.4949	12.8555	11.7372	12.276	12.0138	12.4128	10.9218	11.4873	13.9652	13.6378	14.1875	13.0982	12.5362	11.0641	13.4989	13.8819	14.2276	12.5993	11.7598	12.0042	11.5229	11.0557	10.6378	10.8803	11.266	10.1981	11.5611	12.5111
GLDP1	AT4G33010	AT4G33010	12.8876	12.7958	11.7508	9.44678	9.82836	10.2905	10.6373	9.77263	11.5101	12.7099	13.314	12.1567	10.779	11.0245	10.1741	10.9633	11.3736	10.8693	12.231	12.5387	11.8495	10.7295	10.6507	10.9439	11.3933	10.1182	10.3447	14.0474	13.5062	14.2452	11.0831	11.6076	9.68146	13.6905	13.7896	13.8281	13.3899	13.0017	12.9616	11.3416	11.82	11.3493	12.0766	12.1713	11.622	13.3305	13.6194
AT3G22235	AT3G22235	AT3G22235	13.3455	13.2227	12.7489	12.0427	11.9564	12.005	12.031	11.3657	13.4301	13.3074	11.0518	12.5441	13.2799	12.5891	12.5398	11.9344	13.8083	10.922	12.1235	11.6138	12.638	13.5243	11.2378	12.9654	13.9798	13.0827	10.9799	9.01438	11.4971	6.67145	9.24751	9.07976	7.98627	9.85251	9.39981	9.01646	12.9493	12.9798	13.5123	11.1493	13.4244	12.5793	12.0709	14.3747	11.2747	9.63469	12.3053
BGLU18	AT1G52400	AT1G52400	7.2383	7.64659	8.1212	5.85267	6.27977	6.56613	5.9792	9.33457	6.40954	11.4761	12.0608	11.2505	8.58038	8.62922	8.08395	10.2783	8.90594	8.9776	13.9929	13.8964	14.4209	12.1092	13.1159	10.2039	12.6298	12.3221	12.2484	9.74642	9.34629	12.1118	8.64173	9.17187	6.8902	10.1897	9.0094	10.9608	8.61533	7.74293	7.88247	10.3955	6.89015	9.35956	6.9728	5.99618	6.42829	8.7323	8.16558
GS2	AT5G35630	AT5G35630	13.3471	13.582	13.8898	11.2023	11.2758	11.415	11.5915	10.8824	12.8273	13.848	13.6522	13.7081	11.5771	12.0145	11.79	12.0327	12.4378	11.6647	13.5437	13.3505	13.2306	11.3398	12.1108	11.1719	12.4268	11.1628	12.0381	13.0316	13.2471	12.3799	10.3555	11.2896	8.28023	13.3081	13.1757	12.9667	13.6124	13.8049	13.9575	12.6569	12.1816	12.4092	12.6022	13.1006	12.1408	13.9796	14.0118
ATMS1	AT5G17920	AT5G17920	12.6282	13.0142	13.7026	11.8068	11.8991	11.6783	11.8015	11.9153	12.5409	13.7791	13.2982	13.7646	12.2699	12.7229	12.7347	13.0357	12.9884	12.7006	13.7902	13.6381	13.7652	12.1164	13.5613	12.151	12.9106	12.1205	13.2906	13.0254	12.9022	12.3284	11.9254	12.2055	10.3946	12.8029	12.8246	12.6186	13.0563	13.9058	13.7005	12.9586	12.4012	12.7396	12.6612	13.2324	12.4264	14.058	13.9894
DHAR1	AT1G19570	AT1G19570	9.45318	9.00078	9.06757	10.8897	11.1204	9.63038	9.7365	9.77731	8.69504	13.274	13.9071	12.9583	10.7082	10.0376	9.22994	11.3425	11.2323	11.1749	14.1351	14.263	13.6079	11.3833	13.0388	10.3031	12.9204	12.2113	12.1532	11.5839	11.6107	11.6014	11.8313	11.7716	8.9318	11.7736	11.4844	12.1856	11.1023	9.88344	10.1936	10.5361	10.3261	10.2649	10.4557	9.11634	9.8805	9.9292	10.0713
GRP7	AT2G21660	AT2G21660	9.06999	8.58082	7.75625	10.817	11.0591	10.3783	13.6972	13.1233	11.6669	7.71463	7.27088	7.723	10.9248	10.912	11.1021	12.8001	12.1558	13.1103	7.90915	8.52049	8.96517	11.0245	11.5203	10.8269	12.488	11.9889	13.1553	7.42682	6.60035	6.7458	9.56005	10.9236	13.1952	7.25836	6.67794	6.94523	6.92521	7.43258	7.14218	10.2559	10.3814	10.5639	12.5646	12.4602	12.6741	7.36495	6.99854
GSTU5	AT2G29450	AT2G29450	11.9541	11.8589	11.9765	11.6754	11.8452	11.4076	10.6052	10.4001	10.7822	14.1722	15.072	13.5179	11.2954	10.1056	10.1293	12.048	12.2907	12.3124	13.3557	13.5126	12.5493	11.6987	12.6963	10.9471	12.2739	12.2689	11.9536	11.5136	11.2419	11.0497	11.0221	10.5587	10.9782	11.3331	11.1351	11.3606	11.8229	11.3195	11.3898	10.8553	10.7246	10.3115	10.3316	10.9435	10.6368	10.7018	11.1447
NIT1	AT3G44310	AT3G44310	13.4654	13.1622	13.2369	14.0221	14.2409	13.4467	12.8994	12.4916	12.4921	13.1901	13.5478	13.2332	13.1674	12.5769	12.0536	12.5965	12.3507	12.4438	14.0229	14.2171	13.79	12.5033	13.2542	12.9316	13.3342	12.8689	12.6723	13.5213	12.8618	13.2718	13.8969	12.9736	12.2331	12.6475	13.154	12.7124	14.2302	13.2688	13.7297	13.3149	13.2661	12.8097	12.7213	13.0604	13.2386	13.5316	13.7917
RABE1b	AT4G20360	AT4G20360	13.4817	13.5141	13.8501	11.2456	11.543	11.1258	11.9333	11.1888	12.3401	13.7786	13.6724	13.4906	11.729	12.5069	11.7334	12.4244	12.1545	12.1256	13.5485	13.4934	13.2718	11.7721	12.3109	11.8322	12.3648	11.2818	12.4077	13.2915	13.0223	12.8958	11.507	11.2975	9.28809	13.0171	13.1981	12.5652	13.3708	13.796	13.7098	12.7123	12.0548	12.3716	12.4854	12.7103	12.4506	13.9075	13.8785
RAB18 AT5G66400	AT5G66400	AT5G66400	7.73976	7.15604	6.5354	9.51907	9.63276	7.93072	7.67147	8.97546	8.59784	8.12487	8.64466	7.62929	7.40698	6.38352	7.11822	7.91191	8.84971	7.8856	8.0628	8.34407	7.87941	6.79878	7.65982	7.02173	8.69025	7.67981	7.57278	9.98356	10.3815	13.9982	12.4925	13.5711	14.9485	10.1234	10.4017	14.5264	8.71957	8.05453	8.5837	4.71495	7.17415	5.69146	7.67055	8.56335	5.08771	6.49703	7.49951
SAG21	AT4G02380	AT4G02380	9.41878	7.98594	8.28588	12.987	13.2245	12.725	11.902	12.6252	12.0145	10.7686	9.95021	10.0901	12.663	10.6432	11.1966	9.44472	11.6082	10.4556	7.09614	7.08553	7.53468	10.7786	9.04276	11.2486	10.0201	12.3949	9.10346	8.43724	8.26307	11.742	12.3687	13.1384	16.05	8.28233	8.04429	11.7082	8.5924	8.59473	8.23356	9.28985	10.8294	10.0883	10.2031	11.0161	9.57571	6.93132	6.44994
LOS1	AT1G56070	AT1G56070	11.8959	12.2079	12.7691	11.9058	11.7715	11.7893	12.8612	12.7024	12.2075	12.6183	12.1035	12.4378	11.9694	12.1538	12.3347	13.1109	12.6713	13.2952	12.717	12.6191	12.7004	12.0464	12.4025	11.8834	12.6056	12.8068	13.3928	12.195	11.6733	12.1698	11.9743	12.3633	12.0094	11.8849	11.9522	12.1838	12.2334	13.0522	12.7353	12.5332	12.6662	12.6199	12.9434	13.1776	13.8722	13.0108	12.8356
PETC	AT4G03280	AT4G03280	13.3352	13.4308	13.4272	11.0175	11.1531	10.6304	11.6607	10.9963	12.4247	13.7535	13.7775	13.3804	11.6871	12.2454	11.7097	11.8884	12.0893	11.7178	13.4559	13.3104	13.1816	11.6207	12.191	11.5524	12.2362	11.0263	11.7036	13.0327	13.0812	12.665	10.8079	10.9162	10.5234	13.1125	13.0591	12.7427	13.6642	13.677	13.6311	12.6303	12.044	12.2342	12.402	12.7483	12.1954	13.7971	14.075
AT1G74470	AT1G74470	AT1G74470	13.3182	13.5223	13.5465	9.95142	10.1968	9.93385	12.0275	11.0602	12.3366	13.4152	13.2928	13.0443	11.0054	12.0708	11.7168	12.3055	11.7773	12.3724	13.1652	12.781	13.0388	11.4271	12.2043	11.1619	11.7359	10.7948	12.3659	12.2907	12.5305	12.3492	10.2049	10.6673	9.75738	12.4512	12.3647	11.9715	13.363	13.7539	13.4971	12.8018	12.1504	12.5086	12.7223	13.0591	12.8877	13.7227	13.918
CAT2 AT4G35090	AT4G35090	AT4G35090	14.013	13.528	12.367	11.1372	11.2998	11.4918	11.6033	10.3221	12.3481	12.0822	13.076	11.7033	11.3733	10.755	10.1503	10.8115	11.8063	10.807	12.0029	12.3345	11.4718	10.7094	10.9815	10.7789	11.5814	10.5402	10.3522	14.1716	12.8613	13.7807	11.184	11.5952	9.94224	13.2392	13.6111	13.04	13.8215	12.7448	13.2889	11.7274	12.271	11.7568	12.4347	12.6765	12.1261	12.8288	13.4311
ATPC1	AT4G04640	AT4G04640	13.0732	13.2456	13.1155	10.6387	10.9393	10.4958	11.3016	10.3221	12.1232	13.576	13.6529	13.1976	11.6801	12.1039	11.4914	11.6879	11.9797	11.3476	13.4709	13.2731	13.1851	11.3381	11.9225	11.4283	12.2755	10.8515	11.5268	13.1043	13.0927	12.8716	10.7263	10.9799	9.18188	13.1156	13.1071	12.6436	13.5957	13.6212	13.6198	12.6272	12.1468	12.2971	12.4275	12.7673	12.0558	13.6843	13.9168
GAPC2	AT1G13440	AT1G13440	13.4913	13.4056	13.3021	13.0552	13.3642	12.4802	12.9846	12.5672	13.1272	13.7549	13.7479	13.3001	13.1149	12.8937	12.8106	12.9132	12.9193	12.6595	13.1779	13.1697	13.3266	12.3778	12.7786	12.244	12.8557	12.0139	12.6247	14.3551	13.5671	13.6623	12.9787	13.4202	12.2928	13.365	13.975	13.4313	13.6589	13.6152	13.8226	13.2731	13.0906	13.2215	13.4921	13.2523	12.8583	13.4515	13.9317
VSP2	AT5G24770	AT5G24770	6.13057	6.28413	6.1972	5.8072	6.17047	6.47094	5.14427	6.6132	5.38557	11.9619	12.7481	12.4162	9.52468	9.09103	6.86086	9.86681	9.23585	9.3975	13.4375	13.9276	13.883	11.005	12.0393	9.37213	11.6959	10.9006	11.0807	11.699	12.7497	9.51519	6.9195	7.46294	7.3969	13.7604	10.6398	12.1546	9.06399	7.75755	6.68269	8.32188	6.66046	7.46081	6.34674	5.08387	4.89697	10.7252	10.4955
TGG1	AT5G26000	AT5G26000	12.56	13.0024	13.4728	8.87148	8.71977	9.51183	10.7107	11.2098	12.4356	13.0571	12.2418	14.0027	10.0356	11.207	12.2539	12.7388	11.5869	12.1992	13.1636	12.3646	13.6107	11.3721	12.5247	11.0794	11.4011	11.236	13.2691	8.71042	11.8704	7.5765	8.1559	6.83285	9.96377	11.0123	10.9284	11.2015	12.4003	13.0223	12.9174	11.53	11.8029	11.8681	11.2704	12.3058	11.9267	13.7179	13.4428
PDE334	AT4G32260	AT4G32260	13.9075	13.8359	13.6646	11.6658	11.8592	11.7151	12.4074	11.6105	12.7449	13.8338	14.0158	13.567	12.1901	12.7188	12.1624	12.5659	12.5778	12.4113	13.6319	13.5164	13.3367	12.1396	12.7203	12.1887	12.8308	11.7607	12.3181	13.5656	13.5248	13.0711	11.5419	11.4479	9.6386	13.4528	13.5277	13.3802	13.2885	13.1839	13.1908	12.527	11.8688	12.0133	12.3053	12.5072	12.0805	13.2731	13.5447
UBQ10	AT4G05320	AT4G05320	13.3655	13.2976	12.7806	13.5557	13.3349	13.7623	12.4147	13.3631	13.3767	12.2201	12.4523	12.5813	12.7215	12.7141	12.5751	11.5346	12.5509	11.852	12.5233	12.6018	12.2551	13.5277	12.2165	13.7611	12.9621	13.8235	11.8061	13.4259	12.94	13.796	13.7299	13.4564	12.9704	13.0146	13.1935	13.7776	13.9134	12.7406	12.7227	13.3048	13.9021	13.6164	13.4075	12.9938	12.9819	12.2424	12.7117
SSR16	AT4G34620	AT4G34620	13.5439	13.4939	13.9248	11.3739	11.7368	11.0413	12.7053	12.212	12.5185	13.8044	13.5663	13.5471	12.3131	12.8802	12.6776	13.0879	12.1893	12.9556	13.2597	13.1841	13.2056	12.1438	12.9601	12.0571	12.0359	11.4246	12.9785	12.6534	12.7078	12.4647	10.0829	10.5568	9.55952	12.3776	12.5753	12.3165	13.1364	13.5239	13.4913	13.204	12.1757	12.6382	12.4795	12.5451	12.9042	13.5809	13.9342
CLH1	AT1G19670	AT1G19670	9.8071	9.98531	9.59286	6.09897	6.70254	8.27869	7.41202	7.46063	9.15295	13.3705	14.0855	13.1285	9.84246	8.23553	8.62541	10.9901	11.281	10.8313	13.6709	13.7746	13.3841	11.7489	12.6317	10.2354	12.6425	12.1974	11.4017	9.76808	11.0378	8.41708	7.27903	7.82003	6.93448	10.9615	9.44956	8.48179	11.1721	9.76782	9.92365	9.34665	8.29668	7.81487	8.09284	9.09448	7.41679	10.3545	10.4943
GOX1	AT3G14420	AT3G14420	13.813	13.659	12.795	10.876	10.9098	11.2166	12.0959	11.0457	12.4124	12.959	13.3553	12.6063	11.3502	11.8023	10.6945	11.7384	12.0778	11.7339	12.2765	12.2486	12.2449	11.4523	11.2524	11.5956	12.1107	10.9856	11.3439	13.7004	13.2669	13.4249	11.6516	11.3723	9.01664	13.3066	13.5664	13.0856	13.7936	13.1039	13.4907	12.221	12.0507	11.8563	12.7175	12.634	12.3035	13.2866	13.6067
psbA	ATCG00020	ATCG00020	12.8028	13.4094	10.7601	12.8977	13.0358	11.6792	11.3041	9.73458	11.6954	12.2241	13.4275	11.6502	12.6148	9.96827	10.6306	11.0549	11.2974	9.95231	11.96	13.3183	12.0939	10.1368	11.1507	10.9204	11.2151	10.1461	7.23954	13.5702	14.4158	13.2214	10.157	11.2508	11.1239	12.9419	12.5715	12.7231	13.0392	11.9598	11.961	10.8797	11.5268	11.036	11.5691	11.2086	10.493	12.3022	11.8011
VTC2	AT4G26850	AT4G26850	14.6924	14.3269	13.3319	12.0676	12.1476	13.1659	12.7241	11.7806	13.2265	11.2406	12.7795	11.0792	11.7167	11.3103	10.8941	11.4777	11.2709	11.4636	12.6293	13.1461	12.1732	11.8033	12.1342	11.874	11.909	11.5984	11.3263	13.7094	12.867	12.9639	11.5056	11.6895	11.9932	12.8127	13.1303	12.3942	14.0612	12.6488	12.7065	11.6489	12.5299	11.5317	12.4698	12.4863	12.2067	12.6805	12.8611
GAMMA-TIP	AT2G36830	AT2G36830	11.9335	12.3615	13.0401	13.9639	14.0652	12.3646	11.0677	10.8156	11.804	12.9823	13.1997	12.6986	12.2486	11.4081	11.2998	12.4116	12.34	11.665	13.8811	13.715	13.2026	10.8038	13.1105	10.2215	13.0577	12.1883	12.3391	10.647	11.5328	10.4253	10.1443	10.3857	8.93725	11.0006	11.1836	10.3996	12.5787	13.2457	13.7634	12.7637	12.3069	12.083	12.1441	12.1429	11.9826	12.9529	13.1981
CSD2	AT2G28190	AT2G28190	12.046	13.2892	13.6332	10.2458	10.748	9.96911	10.6065	10.5041	12.4186	12.9612	9.16483	13.4743	9.65749	10.7956	10.9365	11.1462	11.4916	11.0848	12.9171	9.49982	12.8488	10.634	11.1973	10.4788	10.6483	9.66793	11.7663	9.39624	11.8912	8.43217	10.0169	9.78787	9.35478	10.2314	10.0108	11.1374	13.1802	13.4799	13.6933	12.4322	11.5573	11.6053	12.2228	12.624	11.9605	13.0227	13.3839
AT5G27850	AT5G27850	AT5G27850	10.4542	10.7233	12.0885	10.7704	11.0718	10.2504	12.8289	12.5075	11.0916	11.628	10.6765	11.5718	11.7584	12.0382	12.1323	12.6539	11.665	13.0442	11.6976	11.5566	11.7509	11.801	12.1954	11.3719	11.8075	12.4572	13.0266	10.7928	10.1702	10.8317	10.8587	11.285	11.2199	10.2799	10.4602	10.8245	10.8841	11.9932	11.5197	12.4002	11.5456	12.3686	12.0847	11.9927	13.8158	11.9038	11.8998
AT1G32920	AT1G32920	AT1G32920	13.0314	11.8763	9.93263	10.4793	10.6445	11.9152	10.473	11.1378	9.75571	13.3978	14.0554	13.3943	12.2119	11.3426	11.5761	10.4451	10.9069	11.2074	12.0475	12.3591	12.1044	10.8144	9.93923	11.3703	9.34821	14.0643	9.84911	11.9417	13.0852	9.28524	10.1223	10.0718	11.0888	12.0472	11.792	8.24279	10.7757	10.6614	9.53928	8.30232	8.85082	8.93871	9.8399	8.82472	9.91474	10.5489	10.6946
PSBO2	AT3G50820	AT3G50820	12.8613	12.8744	12.9776	11.0762	11.4	11.0427	11.6941	10.8802	11.89	13.5515	13.5959	13.1799	11.2322	11.6519	10.9027	10.9019	11.4454	10.5536	13.2107	12.9826	13.0177	10.9255	10.8939	11.2699	11.7457	10.2661	10.5505	12.7048	13.051	12.2986	10.6668	10.5434	9.04721	12.8178	12.8692	12.4378	13.2513	13.4056	13.2705	12.0997	11.6624	11.746	11.807	12.3407	11.3774	13.4179	13.8898
AT2G23120	AT2G23120	AT2G23120	12.5959	11.7509	10.9647	11.709	12.0215	12.2129	10.4774	10.9178	10.8597	14.2626	14.4445	13.4617	12.2123	11.4943	11.1038	12.3463	12.7091	12.4993	13.1076	13.3175	12.2286	10.8132	12.4802	11.3766	12.054	12.1207	12.414	12.3369	12.233	11.9626	11.4762	10.3642	8.84166	11.6397	12.1333	12.4141	10.3069	10.2101	10.304	10.4364	10.875	10.0591	10.0042	9.89625	9.68216	9.95731	10.3297
AT4G01150	AT4G01150	AT4G01150	13.3044	13.3386	13.1321	10.1804	10.6682	10.4425	11.6846	10.6808	12.1192	13.7005	13.8136	13.3698	11.3647	12.3563	11.814	12.3991	11.6422	12.1545	13.5218	13.257	13.2897	11.7146	12.7999	11.4884	12.0226	10.8725	12.2626	12.7714	13.0385	12.1963	9.54083	10.4607	9.67495	12.9434	12.8266	12.7355	13.2524	13.145	13.1514	12.5612	11.7265	12.1869	11.7914	12.3294	12.3238	13.378	13.7755
AT4G23670	AT4G23670	AT4G23670	12.2368	11.6351	11.9214	10.1715	11.2094	9.38702	10.0352	10.08	10.9726	12.6989	12.9521	12.4181	10.4973	10.4362	9.97516	10.5409	10.5402	10.331	12.0419	12.1978	12.1963	9.86388	10.4251	9.69295	11.2673	9.90955	10.1037	13.3012	13.7363	13.404	12.8558	12.7393	11.4613	13.2004	13.5083	13.9485	12.1612	11.6181	11.575	11.0882	10.5435	10.3855	10.1941	10.6438	10.0282	12.181	12.5599
COR15A	AT2G42540	AT2G42540	9.04766	7.87673	6.94678	7.69068	7.26004	8.75341	6.01219	6.7144	6.80751	11.9558	12.3459	9.94726	7.2413	7.28656	7.27913	7.87623	7.14476	7.79631	14.0724	13.9111	11.9147	7.37278	10.3884	7.38871	9.75746	8.91652	10.2486	9.57273	11.4374	11.0812	7.93807	8.40491	8.95348	10.667	10.3502	11.9624	7.81473	8.10495	8.79658	7.46236	6.81433	7.11983	7.10998	7.34537	6.92352	7.58048	8.44213
emb2386	AT1G02780	AT1G02780	11.8547	11.8598	12.7912	11.5386	11.6134	11.1258	12.7307	12.771	11.7086	12.5308	12.0515	12.4967	12.0638	12.1512	12.0468	13.0566	12.1937	13.2441	12.5501	12.4432	12.5386	11.9354	12.3061	11.7271	12.3213	12.7289	13.2149	12.2237	11.878	12.3262	11.866	12.2723	11.4422	11.8918	12.0449	12.2978	12.0408	12.8276	12.5847	12.4676	12.1497	12.3245	12.5388	12.4959	13.6067	12.8577	12.815
AT5G02960	AT5G02960	AT5G02960	11.7733	11.817	12.9765	11.4048	11.8825	10.8762	12.9505	12.6526	11.6032	12.7046	11.9439	12.4385	12.199	12.2713	12.1672	13.1203	12.1549	13.3563	12.5725	12.4835	12.6493	11.8632	12.4572	11.6473	12.3823	12.6281	13.3545	11.9085	11.3539	11.9305	11.3367	12.1493	11.0352	11.3262	11.6334	11.7684	11.6017	12.5367	12.2753	12.3381	11.7992	12.0003	12.2603	12.2027	13.4504	12.4692	12.6653
TIFY7	AT1G70700	AT1G70700	10.3756	10.3054	9.4253	9.86253	9.60502	10.3226	9.80633	9.1518	9.23282	13.7708	14.542	13.3865	11.251	9.12684	9.86046	11.861	12.2715	12.0911	12.98	13.1261	12.1218	11.4271	12.4612	10.6008	12.5625	12.3901	11.9534	10.8761	11.2588	9.7073	8.81177	9.12655	8.44236	11.6947	10.2085	10.2722	11.4328	9.86892	10.2461	10.3478	10.2482	9.80836	10.1461	9.91508	10.1917	10.1077	10.2793
PRK	AT1G32060	AT1G32060	13.74	13.763	13.0816	10.0789	10.2267	10.4632	11.4204	10.243	12.361	13.1523	13.4147	12.946	11.3833	11.8872	11.436	11.2858	11.7596	10.9043	12.575	12.426	12.5197	11.098	11.496	11.125	11.8146	10.1686	10.8094	13.2895	13.1506	12.8671	9.97454	10.4637	8.04803	13.1186	13.2064	12.7149	13.4504	13.2347	13.3402	12.1331	11.8811	11.7306	12.0879	12.4124	11.4616	13.3455	13.465
eEF-1Bb1	AT1G30230	AT1G30230	11.9493	11.9195	12.4152	11.9286	12.2502	11.5695	12.9812	12.8437	11.9184	11.2931	11.1357	11.3056	12.7178	12.9804	13.1606	12.9835	12.2287	13.1501	11.3586	11.4211	11.4126	12.9578	13.2813	12.6538	12.4069	12.2829	13.0504	11.4175	11.0606	11.6837	11.5902	11.7724	10.9188	10.8835	11.1415	11.6232	11.1219	11.6936	11.595	13.1766	12.314	13.1027	12.4813	12.0857	13.4356	11.1981	11.4308
PCR1	AT1G14880	AT1G14880	9.93917	8.65297	6.13573	11.9973	11.7566	12.9768	11.5291	9.68058	12.8479	5.4191	7.70368	4.38061	14.1334	11.0443	10.4589	5.26938	12.7417	4.56065	4.98935	6.65413	6.47959	13.4681	7.78164	12.8129	11.8039	12.549	5.43518	4.01602	4.62487	3.69872	4.82105	6.05378	5.70228	4.0154	4.08128	3.81516	9.08674	7.51522	7.3832	9.68296	14.0566	12.4002	10.8853	12.5573	9.01327	4.11108	4.87183
GSTF9	AT2G30860	AT2G30860	11.2817	11.4528	10.6417	11.1222	11.4574	10.7348	12.1132	12.6691	11.6419	12.3103	12.9758	12.4302	12.1164	11.6339	11.2743	12.7363	12.2484	12.3721	13.538	13.3414	13.3068	12.6445	13.2466	11.7856	13.241	12.8922	13.0711	13.0463	12.5526	13.0532	12.2456	13.2989	12.5169	12.9143	13.0764	12.9947	12.4506	10.6411	11.0272	11.3918	11.4877	11.6443	12.3557	11.3089	11.6131	11.3235	11.7104
TGG2	AT5G25980	AT5G25980	11.4229	12.3079	13.0581	6.30928	6.0522	7.67003	7.95629	9.97381	11.2092	12.4368	11.8817	13.714	7.6903	9.34624	10.5035	11.578	10.8355	10.2111	12.6673	11.9588	13.484	9.47718	11.1843	9.51884	10.9171	9.47295	12.0769	8.05663	11.6336	6.10199	6.06197	5.03289	7.75889	10.2692	10.0198	9.6649	12.3939	12.7004	12.4055	10.2643	9.29795	10.6826	9.41377	11.9132	9.95355	13.5736	13.263
CAT3 AT1G20620	AT1G20620	AT1G20620	12.5687	12.1501	11.8751	13.5501	13.4222	13.6059	13.7643	13.6293	12.4721	12.3254	12.9256	13.0884	13.539	13.8173	13.3997	12.6022	12.2278	12.7827	12.6997	11.7643	13.7386	13.6823	13.2303	13.6984	12.6425	12.5682	12.5747	12.5803	12.9128	13.7608	14.5578	13.6815	13.2632	13.2044	12.8186	12.4556	12.623	12.1294	12.6758	13.1438	13.1736	13.5869	12.9886	11.5311	12.7045	12.3475	11.896
AT4G39200	AT4G39200	AT4G39200	12.0778	12.1125	13.3318	12.4808	12.6855	11.7125	12.9982	13.0749	12.2667	12.675	11.8645	12.6753	12.9772	13.1766	13.2641	13.2121	12.3733	13.4134	12.4315	12.1982	12.5185	12.8444	13.3927	12.6464	12.3862	12.5091	13.6253	11.6987	11.5298	11.7772	11.8504	12.3351	12.0255	11.5109	11.6308	11.9209	11.1571	12.1924	12.047	12.7154	11.8872	12.4987	12.0751	11.9308	13.0812	12.2438	12.1474
GUN5	AT5G13630	AT5G13630	12.911	13.3167	13.3074	9.90631	10.0425	9.86687	11.6282	10.6569	12.1909	12.9899	12.8165	12.8951	10.4762	11.6076	11.5695	12.2113	11.9905	12.2729	12.3994	11.7905	12.3597	11.1642	11.7707	10.8621	11.4491	10.546	12.1657	11.8771	12.278	11.2647	9.01253	9.64875	8.06805	12.3086	11.9333	11.1288	12.9786	13.4075	13.2094	12.2035	11.8612	12.1908	12.341	12.8261	12.5585	13.4854	13.4383
BGL2	AT3G57260	AT3G57260	8.40627	7.82622	6.23677	12.0892	12.226	12.9825	10.0679	9.63226	11.5128	7.48011	8.27693	6.46191	13.8384	11.3087	10.6846	7.49016	11.7972	8.07829	6.54377	7.99289	6.94092	13.0928	8.65348	12.5283	13.1033	12.7037	8.39203	5.15642	5.84312	9.51165	11.9666	11.383	6.8902	6.56266	5.48981	6.41696	8.24802	7.80055	7.43096	11.1524	14.0023	12.9902	11.6691	11.3379	9.64754	4.44012	4.87183
MIPS1	AT4G39800	AT4G39800	12.6713	12.4192	11.6166	8.50216	9.03247	10.4214	9.52425	9.47675	11.4922	11.3431	11.8538	10.7753	9.14698	9.97418	8.86665	10.835	10.5113	10.3939	10.6453	10.6785	10.8867	8.46138	10.9615	8.8318	9.84831	9.0463	10.2102	13.7504	13.1726	12.9937	10.7031	11.2975	7.3649	13.2064	13.3055	13.6826	12.8741	11.9986	12.169	10.5989	10.3107	10.2834	10.7937	11.5095	10.3136	11.3563	11.9851
AOC2	AT3G25770	AT3G25770	7.19016	7.67133	5.27378	7.44564	7.72697	8.41279	6.97516	6.45843	6.89739	12.9581	14.0544	12.4288	10.7128	9.85967	9.17119	11.0098	10.9565	10.9869	13.6121	13.4796	12.8131	11.2693	13.0594	10.3031	12.3218	11.5586	10.9332	10.0133	10.0789	10.5254	8.26033	9.19645	8.77016	10.3156	9.82571	9.65442	10.0204	7.6362	8.44105	9.77925	9.54076	9.21434	8.24429	8.30865	7.61188	8.53981	8.78574
AT3G09200	AT3G09200	AT3G09200	10.8329	11.195	12.4506	10.8897	11.0807	10.3112	12.0207	12.1205	11.3807	11.9597	11.3071	12.024	11.7042	11.702	12.2676	12.3789	11.7494	12.677	12.0854	11.9586	12.1116	11.6248	12.1281	11.1773	11.7935	12.089	13.0523	11.2932	10.7696	11.2861	10.8408	11.5943	11.8824	11.0402	11.0949	11.2401	11.4504	12.3889	12.1662	12.4801	11.6378	12.4805	12.0709	12.2297	13.6361	12.4264	12.1674
PSAD-2	AT1G03130	AT1G03130	12.4851	12.8095	12.5352	9.13798	9.25849	9.77022	10.0501	9.85915	11.7102	13.323	13.3127	13.2553	10.6278	11.4067	10.7282	11.0454	11.5935	10.3624	13.0345	12.7524	13.1751	10.543	10.8493	10.3423	11.7817	9.91449	10.5859	12.341	13.0777	11.9084	9.37704	9.47482	8.75789	12.9319	12.7411	12.0567	13.1202	13.0338	12.7044	11.7438	11.2628	11.4214	10.9071	12.1199	10.4491	13.2882	13.4378
psbZ	ATCG00300	ATCG00300	12.56	13.283	12.6292	9.87636	9.87846	10.3827	10.2552	9.73939	12.1668	13.3366	13.7162	13.1961	11.3246	10.6395	11.3055	11.6136	11.805	10.8951	12.7845	12.9607	12.6934	10.1905	11.8235	10.5981	11.2214	10.119	8.95003	13.0727	13.3558	12.3992	10.5698	10.4164	9.70082	13.5201	12.6012	12.5455	11.649	11.2711	11.3054	9.79683	9.92448	9.86989	9.74396	10.44	8.87776	11.3084	11.0913
emb2171	AT3G04400	AT3G04400	12.2544	12.2341	13.2485	11.8786	12.2508	11.6249	13.0371	12.8885	12.1337	12.9967	12.4029	13.026	12.5941	12.646	12.6321	13.3274	12.5152	13.3009	12.7663	12.7178	12.976	12.3362	12.9205	12.0953	12.6372	12.5386	13.4157	12.4404	12.1572	12.5482	11.878	12.1662	11.4641	12.0815	12.2517	12.5162	11.8284	12.6073	12.3674	12.716	11.9557	12.4266	12.3398	12.1305	13.0975	12.7489	12.697
AT5G15200	AT5G15200	AT5G15200	11.4436	11.6652	12.9046	11.6466	11.9843	11.3204	12.8945	12.9972	11.9782	12.613	11.8588	12.6545	12.3082	12.1231	12.2139	13.0677	12.3377	13.1975	12.5849	12.5375	12.6816	11.8796	12.3524	11.6826	12.3639	12.5157	13.2599	11.7492	11.4016	11.7537	11.3126	11.9095	11.1836	11.4752	11.4891	11.8755	11.487	12.5603	12.2774	12.3159	11.8118	12.1313	12.4016	12.3345	13.1072	12.6533	12.5076
FD1	AT1G10960	AT1G10960	13.5159	13.3928	13.5495	11.3142	11.6316	11.2068	11.7199	11.3158	12.6341	12.7811	12.6569	12.941	11.6865	11.8888	11.3459	11.817	12.3739	11.6214	12.214	12.2057	12.2487	11.392	11.7867	11.4862	12.2474	11.1536	11.7392	12.9412	12.7281	11.7344	10.5562	10.5144	8.56009	12.6343	12.9182	11.9361	13.0481	13.1854	13.7155	12.4019	12.1004	12.0365	12.3926	12.7874	12.1919	13.3504	13.666
SHM1	AT4G37930	AT4G37930	12.697	12.8067	12.5122	9.62769	9.60152	9.90985	11.1126	9.80969	11.6717	13.1177	13.4659	12.7364	11.0137	11.5221	10.9244	11.5141	11.6068	11.2376	12.9476	13.0128	12.6252	11.1314	11.3614	11.0293	11.9347	10.728	11.0834	12.9145	12.9863	12.4418	10.0464	10.285	8.94268	13.0814	13.0496	12.6192	13.1423	12.8939	13.0241	11.5697	11.3722	11.3797	11.6583	12.2175	11.6386	13.2458	13.3968
AAC1	AT3G08580	AT3G08580	12.4296	12.6809	13.2753	12.3821	12.5003	12.2516	12.0331	12.0009	12.6564	13.3866	13.4264	13.1921	12.6885	12.3377	12.4729	12.5871	12.9867	12.5202	13.5387	13.557	13.2	12.2461	13.0904	11.9614	13.1784	12.6818	13.0788	12.1542	11.9971	11.8979	12.5201	12.7813	12.2342	12.1393	12.1614	12.0175	12.4202	13.0482	13.2288	12.7266	12.5167	12.5924	12.5725	13.0661	12.7256	12.9349	12.8054
OPR3	AT2G06050	AT2G06050	7.87785	7.82622	6.8352	7.90008	7.48974	8.85115	7.21362	7.23398	7.17408	13.6997	14.5413	13.0928	10.2765	8.07616	8.74047	11.5371	12.2427	11.5288	11.9736	12.1967	11.3106	10.1425	11.4071	9.34349	11.1333	10.7381	10.2025	7.93745	8.93864	7.63636	7.1972	7.57214	7.58922	8.97235	7.69019	7.67129	9.1192	6.83082	6.90189	7.18465	8.07502	7.46081	7.35048	7.0746	6.50555	7.31234	7.22264
AT1G51400	AT1G51400	AT1G51400	13.0447	12.9892	12.6346	9.12414	9.36154	9.82898	10.1882	10.0989	11.9898	13.2442	13.6174	13.0916	10.1199	11.245	10.2372	10.6552	11.1864	10.1523	12.733	12.5519	12.8643	9.91531	10.6755	9.91687	11.5715	9.42948	10.32	12.341	13.2632	11.7959	8.58923	8.8072	7.63018	12.836	12.9139	12.104	13.1246	12.718	12.6182	11.5369	11.0176	11.0604	10.6745	11.6284	10.2091	12.9493	13.4636
AT5G20290	AT5G20290	AT5G20290	11.6971	11.8961	13.2479	11.4828	11.6478	10.9778	12.4614	12.6931	11.9378	12.8609	11.9938	12.7804	12.2215	12.3649	12.5584	13.0889	12.2155	13.1277	12.7828	12.5963	12.8228	12.1592	12.639	11.7387	12.192	12.5392	13.2256	11.8245	11.4244	11.8673	11.3391	11.7007	11.0679	11.503	11.6279	11.8266	11.7202	12.8733	12.5523	12.4687	11.731	12.4021	12.16	12.2941	13.0342	12.816	12.8296
ROC4	AT3G62030	AT3G62030	11.7956	12.5389	13.5972	9.4016	9.76397	8.74665	9.94411	9.53324	11.485	13.1617	12.4907	13.158	10.4288	11.0245	10.8662	10.8969	10.803	10.6659	12.843	12.382	12.5613	10.4551	11.2116	10.2075	10.8764	9.48362	11.6336	11.2758	11.9097	10.9372	8.66729	9.59245	7.74653	12.0454	11.615	11.0831	12.1701	13.0076	13.3764	12.1319	10.6886	11.5945	10.8876	11.7823	11.6046	13.3169	13.2376
FAD2	AT3G12120	AT3G12120	12.0589	12.0917	12.077	9.76779	9.88135	9.77022	11.7843	11.6614	11.2321	11.5386	11.9145	11.4008	10.661	11.2129	11.3839	13.0402	11.3934	12.9954	11.5841	11.6999	11.6886	10.9653	12.1502	10.8587	11.3285	11.1541	13.167	12.3016	12.4238	12.4734	11.1243	11.1039	11.0679	12.1098	12.1045	12.7299	11.8287	11.7015	11.7358	11.3072	10.5726	11.2078	11.7192	11.7029	12.2093	11.6736	11.7995
petA	ATCG00540	ATCG00540	12.5955	13.1325	13.4348	10.7299	10.3085	11.4878	11.3496	10.9648	12.5047	13.4322	13.5066	13.2856	11.6796	11.2531	11.6178	12.0387	12.1367	11.4961	13.21	12.9571	12.8236	10.9936	12.0643	11.1491	12.0125	11.1009	11.0088	13.0123	13.1134	12.7419	9.84394	11.2012	10.0265	13.2775	12.5227	12.7533	11.4894	11.5833	11.6797	10.641	10.1034	10.7766	10.2335	10.9225	9.61208	11.2727	11.39
RP1 AT1G43170	AT1G43170	AT1G43170	11.1888	11.4746	12.6459	10.3446	10.4242	10.1205	12.0067	12.2085	11.2975	12.4371	11.5695	12.3831	11.4329	11.6829	11.72	12.8059	11.89	12.8489	12.5427	12.4166	12.4941	11.4294	12.1184	11.1408	11.932	12.4421	13.0164	11.426	11.0601	11.3974	10.8475	11.2941	10.7323	11.2508	11.2796	11.4091	11.5811	12.7523	12.3371	11.9642	11.529	11.9898	11.9851	12.2418	13.2152	12.8279	12.6756
AT3G11630	AT3G11630	AT3G11630	12.1804	12.7369	13.588	9.07223	9.45773	8.61184	10.2379	9.64769	11.4144	13.2191	12.6919	13.1797	10.2027	10.8362	10.6802	11.2112	10.8298	10.9825	12.9601	12.5087	12.7049	10.015	10.9631	9.80459	10.935	9.64078	11.655	11.6576	12.1534	11.1277	8.78867	9.61451	6.86754	12.2773	11.9301	11.6062	12.314	12.9707	13.2219	11.7776	10.4456	11.2429	10.963	11.7639	11.6249	13.2443	13.1616
AT5G27700	AT5G27700	AT5G27700	11.3129	11.1191	12.3061	12.0707	12.3371	11.597	13.2997	13.3861	12.2003	11.732	11.0417	11.67	12.2199	12.186	12.158	12.9556	12.3929	13.1442	11.5777	11.5176	11.5525	11.8033	12.0639	11.7974	12.3814	12.3595	13.0598	11.1125	10.6339	11.2851	11.0954	11.6154	10.7181	10.5851	10.8486	11.263	10.4179	11.4225	11.1682	11.9483	11.3299	11.6184	12.2143	11.9623	12.6648	11.2907	11.4062
MT1A	AT1G07600	AT1G07600	10.8968	10.1932	8.5284	14.7145	15.098	14.649	11.2126	11.6772	10.0236	9.97325	11.4544	8.50986	12.9033	11.7302	10.1928	9.51167	9.61703	9.44863	10.3308	11.3082	8.98312	11.5418	10.6356	12.6217	10.7022	10.7207	9.25208	12.0412	10.6671	11.6939	13.8706	12.5295	10.7197	11.0874	11.866	11.8576	11.6085	9.60218	10.598	11.5731	12.2525	11.5017	9.94934	9.56501	10.4316	8.53694	10.579
APX1	AT1G07890	AT1G07890	12.4747	12.2917	12.7902	11.9575	12.3223	12.4022	11.3948	11.6359	12.7984	13.0521	13.034	13.2788	12.954	11.7912	12.1592	11.9991	13.1864	11.9228	13.5282	13.3372	13.0495	12.5967	12.6907	12.733	13.2955	12.619	12.5199	13.1697	12.1726	13.6856	13.0276	13.6355	12.3081	13.0577	12.8653	12.3108	12.9354	12.7231	13.2731	12.2081	12.7377	12.6106	12.5035	13.1959	11.9645	12.8023	12.8594
SAMDC	AT3G02470	AT3G02470	13.6238	13.7981	13.7557	13.5622	13.581	13.4167	13.3715	12.9972	13.178	12.7072	13.2244	12.4304	12.5126	12.1297	12.0399	12.4561	12.386	12.2517	12.7955	12.9335	12.3987	12.016	11.8555	12.3696	12.4036	12.5045	11.9913	12.6672	12.7778	12.3489	12.9239	12.7668	12.8192	12.7728	12.845	13.0786	13.5558	13.3905	13.4071	12.4765	12.7903	12.4621	12.685	13.0664	13.0079	13.258	13.4085
AT1G07920	AT1G07920	AT1G07920	11.6098	11.7176	12.1507	11.2359	11.2345	11.4172	12.5659	12.51	11.5881	11.9802	11.7472	12.0823	11.552	11.9187	11.7854	12.8654	12.3186	13.2093	12.1449	12.2503	12.1461	11.9251	12.1031	11.7974	12.3285	13.111	13.1158	11.9046	11.6036	11.9906	11.7707	12.0361	11.164	11.7657	11.7253	11.9159	11.0117	11.9043	11.5374	11.611	11.7925	11.6068	12.2545	11.9075	13.1484	12.0098	11.8153
CP12-1	AT2G47400	AT2G47400	13.448	13.1923	13.4343	12.9048	13.3504	12.7103	13.3688	12.7085	12.7555	13.7286	13.5577	13.26	13.019	13.3603	12.5909	12.5838	12.6374	12.5818	13.2972	13.2843	13.1586	12.6956	12.9044	12.898	12.7086	11.9321	12.4315	12.8615	12.8313	12.9095	12.5201	12.3074	12.5599	12.6872	12.815	12.7883	13.046	13.3352	13.48	13.3223	12.9405	12.8853	13.1324	12.8144	12.8874	13.2208	13.6446
AT3G28220	AT3G28220	AT3G28220	7.64771	8.514	9.60425	4.86298	3.93903	6.71203	3.90125	6.41098	7.27814	10.9782	11.0307	10.7338	7.70855	5.77369	4.92987	8.62947	7.36578	7.04883	13.5807	13.2972	13.5496	10.4806	12.577	8.49231	11.5934	11.232	11.2499	8.32484	7.90182	10.1803	5.50452	5.89467	5.9809	8.21004	6.97832	8.82407	8.03913	9.51163	8.26025	6.70794	5.3375	4.21475	5.8894	7.39988	4.92224	9.77615	9.27804
AT1G67865	AT1G67865	AT1G67865	12.5955	12.2111	11.2528	12.7973	13.0809	12.9872	12.0594	11.1676	11.2321	12.4066	13.6548	11.3909	12.2996	10.7527	9.78617	10.9168	11.4684	10.2168	12.0134	13.1529	11.8935	10.3775	10.4145	11.2112	12.3386	11.6576	9.92722	13.8069	12.6221	11.9525	9.4729	9.48284	8.22782	11.7682	13.2835	12.2243	12.4522	10.8409	10.9087	9.69551	11.5981	9.80943	10.7536	10.6913	10.1548	10.4126	11.6862
SAHH2	AT3G23810	AT3G23810	10.1903	11.2377	12.4273	7.71551	7.93065	7.69832	7.8139	9.78896	10.7968	12.3511	11.6868	11.9756	8.62431	10.0637	10.1835	11.1927	11.0886	10.3801	13.4836	13.3171	12.6105	9.65083	12.7217	8.91203	11.8797	10.1777	12.5892	11.5445	11.482	8.67349	8.89199	8.51843	7.84261	11.3073	11.6477	11.2456	11.6291	12.5731	12.7256	11.2347	9.13416	10.5652	10.204	11.9043	10.4311	12.475	12.4135
AT1G23130	AT1G23130	AT1G23130	13.2871	12.9572	11.5892	13.0485	13.2699	13.9216	12.6621	11.6365	12.2157	12.3162	13.5066	11.8713	12.0486	12.1885	10.7431	11.6788	12.0665	11.0609	12.3063	13.0514	12.0362	11.5539	11.1543	12.3617	12.5662	12.2579	10.1635	13.3823	12.945	13.023	13.1173	12.1525	10.8952	13.0834	13.5564	12.9091	13.0796	11.2812	11.3628	10.9437	12.2572	10.8337	11.7501	11.3901	11.222	11.4837	12.0698
PRP4	AT4G38770	AT4G38770	12.615	13.1628	12.6704	5.03062	5.92337	8.48765	9.25131	9.33457	11.3322	13.0799	12.8512	12.8071	8.38988	10.522	11.4202	12.1714	11.4982	11.417	12.8185	12.5666	13.1624	8.78365	12.1009	9.67518	11.3549	9.55615	11.7346	11.5303	13.0454	10.2511	5.14586	7.18694	6.4152	12.2892	12.0759	11.6914	12.9968	13.0022	12.7199	11.9393	10.3116	11.0315	11.2088	12.3327	11.151	13.0118	13.177
ACP4	AT4G25050	AT4G25050	12.8823	13.1591	13.3561	9.51554	9.77023	9.15152	10.5445	9.72734	11.4333	13.3257	12.8323	12.9891	10.5864	11.3358	10.8989	10.8722	10.8242	10.6083	12.8775	12.4168	12.6318	10.1444	10.9534	10.1182	10.784	9.41562	11.2065	10.6382	11.2296	9.91892	9.20975	8.93246	8.2189	10.91	10.9547	9.35477	12.2331	13.1266	13.028	11.684	10.4612	11.0671	10.5466	11.6629	11.1662	13.0013	13.2851
ATMG00020	ATMG00020	ATMG00020	12.9199	13.2616	13.2523	13.2087	13.0309	13.9059	12.9225	14.0743	13.5909	13.5684	12.5567	13.3748	12.5068	12.1196	13.0214	13.0461	13.6741	12.8125	12.7581	12.578	12.9416	12.6544	13.2313	13.0409	13.3581	13.0274	13.5013	12.2904	12.8543	12.2645	13.0489	13.1965	14.7003	13.0668	12.7919	12.7641	12.8307	12.2952	12.6168	12.4937	12.437	12.9405	13.1777	12.9784	11.9279	12.9939	12.6975
HA1	AT2G18960	AT2G18960	11.4623	11.3632	11.2672	12.1513	12.007	11.7719	12.3918	11.77	11.6653	10.5998	10.6996	10.9346	11.8021	12.557	12.5793	12.3697	11.8046	12.5706	10.8999	10.7825	10.8711	12.7194	12.7579	12.6499	11.7725	11.7713	12.4275	10.9848	11.0067	11.44	12.1477	11.7822	12.1801	11.4701	11.2235	10.9283	11.4544	11.4396	11.5724	13.2134	12.6858	13.325	12.3314	12.2301	12.7932	11.2344	10.9972
AT2G41090	AT2G41090	AT2G41090	13.5891	13.2985	12.8546	11.9299	12.1697	12.033	12.0406	11.2321	12.8851	12.9364	12.4836	12.9235	12.4854	12.3728	11.9499	11.9658	12.7663	11.3728	11.6697	11.9497	12.3108	12.2535	11.2204	12.0179	13.0918	12.4895	11.2987	10.1536	10.776	6.60642	9.68039	9.75515	7.48886	10.5562	10.5923	8.65707	13.7486	12.6277	13.1671	11.3755	12.0196	11.8527	12.1453	12.8541	11.4037	11.316	12.0825
ERD15	AT2G41430	AT2G41430	11.7862	11.439	10.2346	10.7734	10.907	11.1362	10.6783	10.9933	10.7296	13.8078	14.4167	13.5177	11.8917	11.6598	11.286	11.8028	12.4878	11.807	11.3888	11.3	11.1063	11.3849	10.7806	11.544	11.3398	11.1343	10.0802	11.4696	11.9113	11.1728	11.5605	10.5134	10.2899	11.4189	11.5247	11.3463	11.2949	10.8528	10.6158	10.661	10.7477	10.557	10.4266	10.0585	9.4467	10.7158	10.8918
GSTF2	AT4G02520	AT4G02520	11.453	10.6009	10.9084	12.3393	12.5134	13.5154	12.1666	12.5974	13.2025	9.57968	9.55246	9.7536	13.2449	10.8459	12.223	9.69822	12.042	9.57289	8.56966	7.47643	9.06122	11.483	8.78313	10.9826	11.2989	11.3746	9.25332	8.16262	6.67522	8.71727	8.65712	9.64875	10.426	6.45418	6.87618	6.38833	10.9717	10.5991	12.7725	12.001	13.2929	13.2234	12.2394	13.0888	11.3105	8.54266	8.60085
SBPASE	AT3G55800	AT3G55800	13.2273	13.2276	12.8251	9.45786	10.0908	9.71244	10.7442	9.78198	11.7363	13.265	13.2622	12.9026	10.7407	11.419	10.8485	11.0404	11.3085	10.8021	12.8395	12.8748	12.4939	10.5823	11.3237	10.4875	11.5403	10.0052	10.9724	12.8304	12.6393	12.6487	9.95393	10.4164	8.00715	12.6277	12.7507	12.2502	12.7856	12.7058	12.7158	11.4848	10.9249	11.0451	11.3069	11.8602	11.1348	12.8761	13.1518
PIP3	AT4G35100	AT4G35100	13.2482	13.416	13.5202	8.42147	9.31949	10.3204	11.3128	11.3021	12.2808	12.6188	11.9169	12.3941	9.88923	11.5852	10.5097	11.6684	10.6972	11.1	12.8189	12.8463	12.1266	10.1941	11.379	10.0587	10.8899	10.3228	11.2502	10.8848	11.6828	10.6411	9.45247	8.77166	7.34862	11.3992	11.147	10.9252	11.9405	13.2424	13.1315	11.0029	10.2731	10.5152	10.7949	11.1391	11.157	12.9262	13.1367
psaJ	ATCG00630	ATCG00630	13.6872	13.6605	12.6741	10.9999	11.2368	11.7877	11.7017	11.7167	12.5981	13.6325	13.4383	12.7945	11.4486	10.2277	10.7621	11.714	11.9255	10.807	12.5393	12.7473	12.5802	9.6429	11.169	9.97613	11.7665	10.331	9.60328	12.3408	12.2083	12.0906	8.72683	9.98977	10.5052	11.7261	11.5612	12.2439	7.90127	7.33196	8.14224	6.53996	6.29253	5.97578	8.70044	7.0746	5.51055	7.25077	7.16026
EMB2296	AT2G18020	AT2G18020	10.9981	11.2556	12.464	10.6834	10.9924	10.0968	12.4033	12.1265	11.2081	12.2958	11.4973	12.1767	11.4628	11.5254	11.3091	12.5444	11.6928	12.8528	12.26	12.1442	12.3113	11.1568	11.7015	10.9247	11.9424	12.3853	12.9901	11.5127	10.997	11.46	10.809	11.435	10.4163	11.0277	11.2493	11.4443	11.2593	12.1364	11.8761	11.507	11.1555	11.2633	11.6371	11.8274	13.0245	12.1992	12.1518
LURP1	AT2G14560	AT2G14560	11.9145	11.1943	9.9491	12.3442	12.3013	12.989	11.9165	11.8732	12.8355	9.37105	7.59721	9.23554	12.6879	11.4469	11.826	8.40683	12.4731	7.91013	7.10403	5.97143	8.77482	12.6857	7.76697	12.9615	11.5912	11.4749	7.8629	5.675	8.0823	3.79524	11.259	9.03686	7.67002	6.46665	5.51269	5.19955	11.2698	9.48259	10.6997	10.7473	13.4546	12.6211	11.8197	13.3328	10.0669	5.37949	7.35105
AT2G34480	AT2G34480	AT2G34480	11.6652	11.834	12.7943	11.4199	11.8251	10.6486	12.4812	12.39	11.4324	12.5217	11.8731	12.4998	12.0704	12.264	12.0651	12.8664	11.9259	13.0078	12.5615	12.5003	12.5823	11.8791	12.3843	11.6137	12.1341	12.4577	13.1145	11.7951	11.4235	11.7009	11.4682	11.9516	11.4856	11.4581	11.5961	11.7712	11.2913	12.2372	12.004	12.0453	11.4654	11.7607	11.6798	11.7503	12.9638	12.2279	12.2762
AT3G60750	AT3G60750	AT3G60750	12.8147	13.0486	13.0578	10.5483	10.492	10.6897	11.3964	10.6657	12.1486	13.1591	13.2009	13.0747	11.4024	12.1262	11.7714	11.9371	12.0308	11.7396	12.9272	12.64	12.7369	11.5297	12.0262	11.4321	12.0237	10.9301	11.8632	12.7453	12.8657	12.7332	11.2189	11.4443	10.17	12.8506	12.8174	12.2203	12.7796	13.0081	13.044	12.0214	11.6875	11.8972	11.9344	12.2851	11.8364	13.1584	13.0276
CYT1	AT2G39770	AT2G39770	11.2399	11.1546	10.6554	10.0178	10.0503	10.5647	10.7188	10.5541	10.9648	12.3329	13.2226	12.2879	10.4479	10.3942	10.5887	11.2764	11.7747	11.1711	13.2045	13.5974	12.5181	11.153	12.5906	10.5994	12.5791	12.137	12.0877	10.5299	10.8337	9.87818	9.33939	9.82617	9.44173	11.0155	10.5312	10.0307	10.844	10.4593	10.5594	10.4668	10.3038	10.2223	10.8865	10.7687	10.1115	10.5833	10.6431
FSD1	AT4G25100	AT4G25100	11.7868	9.22899	8.5204	10.9641	10.8637	10.7107	9.67604	5.14157	5.11284	12.345	13.941	7.07787	12.5291	12.0121	12.012	10.9239	10.0899	11.1904	11.5642	13.1324	10.3018	10.7592	12.1879	10.2798	12.0791	10.5255	9.84419	12.7814	10.9613	12.5389	9.7961	11.8316	7.24694	12.8494	12.7321	11.0691	7.46929	4.69052	4.58897	10.3229	9.39548	11.3167	5.42836	3.7803	9.45214	11.3235	10.5056
LTP5	AT3G51600	AT3G51600	12.0822	11.9195	12.65	8.78617	9.87265	8.1918	10.285	10.1395	10.8791	12.1606	11.631	12.2681	10.3335	11.5638	12.0093	11.7291	10.8274	11.3506	12.3254	11.9382	12.2501	10.2802	11.9166	10.2406	11.0505	9.78896	11.8885	11.6002	11.8087	11.0344	8.85244	9.53194	7.61666	11.6733	12.0716	11.6058	12.9769	12.7617	12.8072	13.1009	11.8473	12.1071	11.703	12.5065	12.04	13.0319	13.189
TRX3	AT5G42980	AT5G42980	12.5913	12.3266	11.4456	12.7523	12.9146	13.3909	11.9982	11.4793	11.9083	12.4535	13.3792	11.841	12.7771	12.0207	11.3536	11.5804	12.3076	11.3027	12.435	12.9984	12.1498	11.7872	11.7615	12.0771	12.8779	12.2768	11.1715	13.295	12.9688	13.2697	12.9172	12.8791	12.5259	13.0265	13.44	13.123	12.3669	11.1622	11.5173	11.5027	12.4482	11.4964	12	11.2221	11.4051	11.0639	11.8264
AT1G66100	AT1G66100	AT1G66100	13.4704	13.377	11.8338	5.93953	6.47628	9.67733	9.16961	8.30831	11.711	12.6728	13.3665	12.7766	9.9442	7.46502	7.87509	10.3435	10.6264	9.78668	13.0425	12.7243	12.7882	8.58253	11.6801	7.90666	11.8268	11.1156	10.5107	9.3539	11.4889	4.86575	5.54919	5.07592	6.67216	9.45135	9.02141	7.30832	12.4269	11.9351	11.5758	10.347	10.8616	9.17024	11.5677	11.3172	9.66916	12.726	13.3011
AT1G67430	AT1G67430	AT1G67430	11.4606	11.6028	12.9058	11.3061	11.6864	10.829	12.1358	12.3727	11.5514	12.4846	11.6136	12.4559	12.122	12.1783	12.3445	12.8005	11.8961	12.8531	12.536	12.4791	12.5367	11.9086	12.5329	11.558	12.13	12.4246	13.0049	11.437	10.9817	11.448	11.1426	11.7777	11.1802	11.007	11.184	11.388	10.9817	12.2773	11.9225	12.2134	11.4352	12.0617	11.6733	11.7023	13.017	12.1908	12.149
AT1G62510	AT1G62510	AT1G62510	7.96626	7.72746	7.01665	7.54594	7.94178	5.65495	4.42669	5.82374	7.11909	9.90558	10.6643	7.9258	7.68108	5.77369	5.89446	6.10278	6.48481	5.21395	8.6925	9.56813	8.01206	6.30357	5.1817	7.31193	7.21589	6.08618	4.75683	12.0409	12.1836	14.1646	10.9819	12.3679	10.089	11.1287	11.7053	12.6442	9.70605	9.80114	10.0975	4.93413	5.56271	3.3161	7.56781	8.81807	4.87125	10.2578	10.7528
AT5G18380	AT5G18380	AT5G18380	12.0915	11.9917	13.0138	12.2734	12.3756	11.4766	12.5116	12.6656	11.8206	12.6269	12.0479	12.5213	12.5568	12.4049	12.4491	12.8514	12.0689	13.0666	12.6133	12.618	12.6249	12.0272	12.6829	11.7826	12.2325	12.7176	13.1182	12.2124	11.6492	12.4836	11.5895	12.1777	11.6548	11.6499	11.8719	12.2858	11.4441	12.297	11.9881	12.3639	11.8209	12.1681	11.8702	11.9017	12.9137	12.2446	12.2472
AT3G28270	AT3G28270	AT3G28270	10.5621	9.46659	8.06735	7.38503	8.55559	7.88221	6.09149	5.89446	7.74566	8.38236	8.87371	7.79382	8.1235	6.71997	6.01188	6.85548	6.6254	5.62294	11.0001	11.2091	10.5318	8.59904	10.6784	7.15958	10.0212	9.68304	8.63368	12.6969	11.2218	13.9462	11.5161	11.9265	8.26297	12.0906	12.2215	13.1547	10.3235	8.55063	9.66728	7.98414	8.11507	6.02061	6.74394	7.833	6.72962	7.95115	8.64707
ACT2	AT3G18780	AT3G18780	13.6006	13.4983	13.1037	12.2277	11.8198	12.2641	12.7343	12.2809	12.7622	12.5246	12.7605	12.3379	12.1795	12.4121	12.3574	12.9044	12.584	12.7233	12.2411	12.4502	12.1513	12.1986	12.6425	12.0344	12.3751	11.8737	12.5652	12.376	11.9919	12.2886	11.0631	11.1878	11.4345	11.6581	11.948	11.7038	12.5955	12.8459	12.9033	12.2843	12.2133	12.2046	12.5907	12.8838	12.6002	12.5024	12.6069
AT1G76960	AT1G76960	AT1G76960	9.91469	9.32306	5.69905	13.8649	14.3796	14.2481	11.6067	10.9993	11.4116	6.11796	8.33014	5.33335	12.9621	11.0758	9.29799	6.88271	11.4684	7.634	5.82089	8.0525	6.40166	11.9739	7.43689	11.8447	12.282	11.8281	7.15726	12.4591	9.19124	12.9758	13.1498	13.1083	11.5511	10.2719	11.6538	11.7674	10.5569	7.71323	9.69827	9.83022	12.6321	11.3001	11.5656	10.4443	8.70108	4.62402	5.04753
UBQ1	AT3G52590	AT3G52590	11.6415	11.632	12.9044	11.7967	12.2333	11.415	12.9403	12.8779	11.9384	12.8543	12.0569	12.6773	12.3744	12.4005	12.2023	12.8882	12.2831	13.0709	12.6419	12.5563	12.6186	12.0398	12.4313	11.8889	12.4173	12.4542	13.0876	11.9588	11.5374	11.8436	11.7087	12.1771	11.634	11.4752	11.7296	11.9496	11.2098	12.0811	11.8773	12.0947	11.5194	11.6976	11.8643	11.7625	12.6463	12.189	12.1697
AT4G18440	AT4G18440	AT4G18440	6.92197	7.86248	7.76304	6.13622	6.38137	6.18131	7.0722	6.31112	6.52684	11.7854	12.9984	11.8917	9.18659	8.9179	7.8198	10.1204	9.80782	10.1	13.2749	13.334	12.9552	10.2422	11.5398	8.54916	11.8754	10.7857	10.505	8.45738	10.303	7.42635	6.31572	6.3451	6.93448	10.5088	8.16833	7.7007	10.5064	9.45145	8.97976	8.70618	7.92989	8.18352	8.00036	7.84178	7.64261	9.99535	10.0491
COR413-PM1	AT2G15970	AT2G15970	11.0619	10.8605	10.5863	10.3326	10.533	10.2623	10.2518	10.1303	10.5507	11.5468	11.6611	10.8935	10.4947	10.6616	10.2612	10.3353	10.079	10.0177	13.0639	12.5249	11.9843	10.2157	12.1064	10.2798	10.7043	9.3875	11.1656	12.6596	12.5862	13.1303	11.7283	11.4606	9.62853	12.0265	12.5364	13.6156	11.3407	11.224	11.461	10.6757	10.3236	10.0537	10.4204	10.5499	9.84543	10.7196	11.1366
TT4	AT5G13930	AT5G13930	8.83455	11.1524	12.0359	7.32177	7.29518	5.53457	6.81616	8.5737	9.83178	10.3141	8.32061	10.7643	6.35045	6.68196	7.4861	8.3656	8.48571	8.09264	10.1047	9.17631	10.0345	7.10647	8.86811	7.35083	8.24302	6.99914	10.2597	5.84765	9.97411	8.34317	13.8629	14.0827	11.8343	11.5695	9.28658	11.4338	11.4145	11.2253	11.1807	10.2164	7.87963	9.37403	9.32537	10.7361	9.78904	12.5658	12.4449
AT3G62870	AT3G62870	AT3G62870	10.5871	10.8968	12.0976	10.2795	10.4497	9.45493	11.7657	11.7149	10.3839	11.7685	11.0388	11.6585	11.0553	11.3118	11.3063	12.0951	10.9168	12.4245	11.9434	11.9145	11.9804	11.0527	11.6328	10.7489	11.2292	12.024	12.4509	11.1288	10.5845	11.2871	10.6073	11.0044	10.6215	10.6798	10.8592	11.1624	10.938	12.0794	11.5935	11.5359	11.0049	11.3926	11.2061	11.369	13.252	12.0374	12.0753
AT4G16190	AT4G16190	AT4G16190	11.5039	10.5485	9.05101	13.0399	13.1294	13.7003	12.9219	12.852	11.5617	9.17927	10.4162	8.95051	12.3422	11.9284	11.4122	11.54	11.2608	11.7192	9.27979	9.52107	9.62554	12.6757	11.15	12.8239	11.5148	11.5996	10.9543	12.5544	11.6557	13.3342	12.9103	13.1493	12.3129	12.0239	12.2661	13.1328	11.4572	9.90877	10.3902	11.8068	12.8388	12.1745	12.5088	11.1708	11.9442	9.82743	10.0645
PMDH2	AT5G09660	AT5G09660	12.6399	12.5854	11.714	9.41682	9.5479	9.72624	11.0091	9.6528	11.0952	12.4612	13.0256	11.9983	10.698	11.2079	10.2788	10.9413	11.0117	10.8097	11.7998	12.068	11.6652	10.6643	10.765	10.7392	11.3209	9.91449	10.3574	13.0276	12.576	12.5343	9.6293	9.85115	8.41917	12.509	12.8197	12.4424	13.1429	12.5198	12.5561	11.4688	11.3543	11.0173	11.6785	11.7711	11.2615	12.6469	13.105
AOC1	AT3G25760	AT3G25760	6.51621	6.80001	3.92811	8.27885	8.48886	8.75341	7.12592	6.91481	5.56086	12.7216	14.1897	12.439	9.69231	7.55188	7.87509	10.4489	10.3049	10.5575	12.3321	12.2218	12.0181	9.5582	11.3535	9.76433	11.5791	10.6597	9.28756	8.35019	7.80512	9.30791	7.68141	8.2632	7.41264	8.21744	8.12816	8.24679	9.72726	5.25503	5.65978	7.98822	8.35135	7.50355	7.2701	5.42491	6.26013	6.81324	5.8667
ALP	AT5G60360	AT5G60360	12.0833	11.4652	10.3451	12.9315	13.0221	13.5674	12.3257	12.5243	12.0626	10.6967	11.7701	10.5041	12.2051	11.4701	11.0151	10.5837	11.239	10.7413	10.4385	10.7335	10.5959	11.9025	10.5222	12.3429	11.5784	11.4082	9.96096	12.9883	12.5295	13.3143	13.2358	13.1036	12.3593	12.6188	12.9196	13.5168	12.2659	11.2449	11.9332	11.4478	12.3279	11.7703	11.2998	11.2446	11.3427	10.6818	11.0446
AT1G11860	AT1G11860	AT1G11860	12.38	12.5928	12.7226	8.12983	8.25901	8.75341	10.0382	9.39984	11.3251	12.9433	12.8543	12.7693	9.40384	10.7261	10.5552	10.8413	10.8907	10.679	12.5024	12.2944	12.2265	9.8887	10.864	9.79286	11.0695	9.53066	11.0468	11.6734	12.255	11.0818	9.00051	9.13928	7.24694	12.1611	12.0149	11.1331	12.4161	12.8008	12.7981	11.1556	10.4282	10.8861	10.8338	11.6777	10.681	13.0342	12.9807
CRB	AT1G09340	AT1G09340	12.6127	12.7638	12.4044	8.56497	8.96315	9.03987	10.2604	9.12632	11.218	12.9687	12.8849	12.6163	10.2235	11.1385	10.3806	10.7163	10.9251	10.5393	12.6175	12.4935	12.3625	10.3997	11.0145	10.2932	11.1369	9.71847	10.6503	12.1322	12.3715	11.7187	8.83901	8.99824	7.56125	12.2001	12.2971	11.6958	12.4696	12.7031	12.6806	11.292	10.8002	10.9794	11.1136	11.6966	10.9682	12.9653	13.2296
AT3G49910	AT3G49910	AT3G49910	11.3949	11.4504	12.8165	11.2772	11.7142	10.5356	12.1141	12.3893	11.3943	12.2751	11.3795	12.1372	12.0324	12.0536	12.1938	12.8303	11.7835	12.8281	12.3065	12.2009	12.3315	11.7278	12.4694	11.4154	11.9042	12.1948	12.9742	11.3924	10.8411	11.4288	10.9849	11.6195	11.0765	10.8747	11.1598	11.3416	10.9482	12.1531	11.8712	12.0795	11.2721	11.8957	11.6067	11.7152	12.608	12.026	12.1385
HPR	AT1G68010	AT1G68010	12.6923	12.7061	11.9677	9.61455	9.79192	9.56274	10.7275	9.55523	11.2778	12.2477	12.7401	11.8143	10.5889	11.049	10.3419	10.6212	10.7459	10.448	11.4329	11.4848	11.4193	10.4716	10.3121	10.47	10.7008	9.36171	9.79062	12.9015	12.5946	12.6059	10.5411	10.3974	8.04803	12.4937	12.8153	12.2454	13.0384	12.5902	12.7078	11.5611	11.4773	11.2734	11.5795	11.7734	11.345	12.7427	13.0687
POM1	AT1G05850	AT1G05850	11.7922	12.2424	12.2143	8.55813	8.22296	8.93677	9.19317	9.77028	11.1771	12.6899	12.6292	12.4251	9.58522	10.4419	10.8356	11.2224	11.4601	10.4487	12.5039	12.5328	12.4982	9.71786	11.46	9.44586	11.6956	10.2435	11.1391	11.8063	12.442	10.7766	7.86928	8.79116	7.09915	12.0944	12.0988	11.941	12.715	12.9079	12.852	11.5261	10.4628	11.0786	11.3917	12.0466	10.5674	12.7581	12.9783
CYP18-3	AT4G38740	AT4G38740	12.0583	12.0047	11.0636	10.6897	10.9027	10.9457	10.705	10.4538	11.0505	11.8356	12.6869	11.756	11.0329	10.5683	10.6511	11.1722	11.2268	10.9941	12.2862	12.651	12.0469	11.0686	11.5181	10.6665	11.6949	11.1385	10.8988	13.0751	12.6148	12.7328	11.9185	12.1955	10.5768	12.7771	13.0636	13.2285	12.5054	11.4948	11.3863	10.9252	11.2677	11.1652	11.516	11.2446	10.9173	11.3868	11.8414
GGP1	AT4G30530	AT4G30530	10.0445	10.1484	8.60599	9.84857	10.0833	10.3226	10.0786	9.59027	9.21545	12.552	13.8472	11.8284	10.698	9.48239	9.16487	11.4419	11.4375	11.3173	12.6421	12.9123	11.8744	11.0677	12.1381	10.3163	12.1115	12.1121	11.2834	10.9609	10.5183	10.6165	10.0999	10.6496	9.35885	10.8084	10.9332	10.4385	11.1448	8.79229	9.11956	9.71783	10.0984	9.61359	10.3025	9.35422	9.73659	9.61853	10.1978
AT3G09440	AT3G09440	AT3G09440	13.3578	13.4402	13.6639	12.0397	11.9782	12.5671	11.576	11.7427	13.24	11.1318	11.8085	10.6488	11.7223	11.3645	11.9074	11.3828	12.457	11.3625	12.0754	12.5463	11.9946	12.0623	12.2545	11.7227	12.0499	12.2758	11.8955	11.4725	10.7408	10.6516	11.4164	11.7609	10.3422	10.5736	10.8983	10.8138	12.1166	12.2771	12.2116	11.8962	12.3904	12.1366	12.0273	13.2632	11.9886	10.8897	11.1797
CYP83B1	AT4G31500	AT4G31500	10.4111	10.4034	9.50241	9.86253	9.74185	10.8544	11.9181	11.8846	11.0772	12.3467	13.0342	12.0365	11.2385	10.0526	10.6578	11.9937	12.3044	11.7651	13.1293	12.9692	12.478	11.6599	12.5	10.7477	12.3657	12.3228	11.7263	10.3085	10.6022	9.40479	9.49875	11.5444	8.90423	10.7356	10.4543	8.89194	11.3403	10.1421	10.0655	10.2137	10.9829	10.5404	11.474	11.2246	10.604	10.3132	10.3255
GAPC1	AT3G04120	AT3G04120	12.0572	12.1167	12.6143	12.3912	12.526	12.1963	12.4524	12.3996	12.474	12.5586	12.3273	12.5734	12.6444	11.9187	12.1981	12.1696	12.5501	12.4808	12.3761	12.1307	12.4572	11.9042	11.859	11.9466	12.5162	12.7494	12.5469	12.1441	12.0206	11.996	12.2935	12.9261	12.5196	12.1116	12.181	12.1585	12.1022	12.4832	12.6616	12.3053	12.4078	12.3529	12.4759	12.4733	13.193	12.4318	12.4321
RPS17	AT1G79850	AT1G79850	12.1835	12.4079	13.4708	9.76185	10.1472	9.43405	10.6917	10.0951	11.2799	13.0901	12.5816	13.1176	10.949	11.7156	11.0787	11.7573	11.0845	11.464	12.806	12.4521	12.6486	10.8109	11.7771	10.7896	11.1426	10.1104	11.911	11.7825	12.0053	11.5396	10.0464	10.2677	8.44236	12.016	11.8022	11.5838	11.4663	12.376	12.3256	11.5127	10.5101	11.0568	10.861	11.0472	11.1676	12.5971	12.5161
AT3G41768	AT3G41768	AT3G41768	13.036	13.7298	11.8849	12.901	13.0149	12.9313	12.5628	13.1281	12.2792	13.3276	11.9901	13.6096	12.4118	11.6333	12.0837	12.5541	12.256	11.8652	12.2784	12.8828	12.7629	12.0899	11.8991	11.8656	12.45	12.3083	11.4986	11.7262	12.4643	12.8406	12.353	12.2121	14.1702	11.6369	11.5457	12.0416	12.2385	11.7286	12.1879	11.9642	11.0608	11.1036	12.6564	12.0437	11.6223	11.6859	11.336
AT4G32020	AT4G32020	AT4G32020	12.8419	12.4648	11.0622	13.1109	12.9836	13.4493	12.6901	12.6516	12.4694	11.8729	12.6908	11.9087	12.8731	12.1978	12.2215	12.6299	13.1432	12.6813	11.8385	12.0066	11.7505	12.0534	12.4096	12.3433	12.6213	12.8076	12.1049	12.8301	12.7163	12.608	12.2878	12.558	12.5735	12.3161	12.5385	12.1248	12.4176	11.9252	11.4398	12.0281	12.9423	11.9541	12.9959	12.6058	12.3063	11.5255	11.647
rps4	ATCG00380	ATCG00380	12.4789	12.7467	13.3167	10.6866	11.0869	11.0955	11.6145	11.1305	11.5366	13.0029	12.4534	13.2464	11.5482	11.0949	11.6339	11.9994	11.8017	11.9345	12.3824	12.3884	12.0799	11.1816	11.4519	10.2145	11.8127	10.994	11.3621	12.2676	12.7285	13.0158	9.95185	11.6682	10.3646	12.4647	12.0884	12.6341	11.0746	10.6392	11.065	10.4274	9.85878	10.2119	10.4048	10.4508	9.87323	11.4284	10.8792
AT1G78040	AT1G78040	AT1G78040	12.2179	12.3706	12.8566	10.8925	10.9911	10.1516	10.6615	10.9534	11.6165	13.1244	12.8179	12.8532	11.6592	12.0985	11.7895	12.1182	11.9909	11.5787	12.8245	12.8725	12.6652	11.0487	12.4743	10.8788	12.234	11.0962	11.9503	11.9085	12.2252	11.1467	9.61886	10.0797	8.20992	11.8546	11.9958	11.9177	12.3114	12.8402	12.7213	12.2438	11.2902	11.6709	11.626	11.9771	11.3114	12.6359	12.8924
ARFA1E	AT3G62290	AT3G62290	13.4935	13.1907	12.7985	12.9668	12.713	12.9159	13.0253	13.1672	13.2653	12.2387	12.6803	12.4659	13.0121	12.7226	12.9805	12.6605	12.99	12.5938	11.6519	11.7233	12.0874	12.8814	12.8044	12.6362	12.8128	12.404	12.3598	12.995	13.1986	13.4606	12.1915	12.4466	11.6507	12.8742	12.8675	13.363	12.5335	12.2669	12.3859	12.6315	12.6046	12.8029	12.8073	12.5262	11.9873	12.1752	12.018
TRX5	AT1G45145	AT1G45145	9.17678	8.35003	6.47049	13.5225	13.7184	14.7593	11.7311	12.1246	11.4823	10.7984	11.5599	9.79591	12.7833	11.2748	11.3941	9.79576	11.961	10.4148	10.0434	10.3812	9.42351	12.8043	11.1429	13.0947	12.1359	12.5316	9.5569	8.72433	8.78654	9.62761	12.3276	11.6135	12.9096	9.01328	8.76695	9.57246	7.99608	6.28899	7.67714	10.1126	11.8097	11.1221	10.3513	8.93342	8.26311	4.33855	5.73594
AT5G03350	AT5G03350	AT5G03350	10.6208	10.7124	10.4371	8.12057	8.74541	10.8947	10.0561	8.8297	11.7001	11.8724	9.64127	11.4946	12.3097	10.5761	10.2402	8.99237	12.1918	7.50037	10.7702	8.87548	10.8657	12.2421	8.06571	11.059	11.4211	10.4411	8.97576	4.50297	8.85255	2.92482	4.30029	5.8458	5.53978	5.71937	5.06374	3.176	9.86283	11.7779	11.0811	9.48465	13.1459	11.7334	10.8859	13.2907	8.8418	9.00514	10.6635
SAM1	AT1G02500	AT1G02500	11.2399	11.5752	11.9252	11.5797	11.1792	11.6595	12.3314	12.5601	12.2014	11.3063	11.3059	11.4808	11.4821	11.7285	11.7916	12.419	12.5869	12.5635	11.3487	11.1594	11.1271	11.9489	12.1498	11.7832	12.4171	12.0281	12.5812	11.1644	11.4605	11.0157	11.1271	11.3776	10.5216	11.2969	11.3849	11.6381	11.277	11.7103	11.7439	11.6499	12.0367	11.7716	12.3842	12.4634	12.2176	11.4744	11.4687
ATCG01130	ATCG01130	ATCG01130	12.0756	12.743	13.4431	10.6092	11.0437	10.2141	11.3728	11.2964	12.2277	12.7987	12.0106	13.1296	11.1577	11.6202	11.7254	12.5532	11.6431	12.4186	12.4189	11.9861	12.6076	11.0795	12.2698	10.7538	11.0245	10.9856	12.5347	11.4337	11.5453	12.0299	9.66017	10.7097	10.0964	11.2881	10.8565	10.9239	11.1894	12.3357	12.4755	11.8102	10.8348	11.4865	11.3352	11.3923	11.4796	12.5015	12.3583
UBQ11	AT4G05050	AT4G05050	13.3441	12.9359	12.3383	13.3051	13.3634	13.7116	11.9851	12.6385	13.035	13.2504	13.8629	13.1091	12.5355	11.7499	11.7646	11.7849	12.6923	12.1755	12.0013	12.0545	11.9476	12.4299	11.6206	12.8181	12.106	12.2877	11.2252	12.9822	12.7439	12.376	12.6565	12.3931	12.0185	12.4205	12.6358	12.925	12.8046	11.8952	12.0363	12.3818	13.2819	12.5693	12.6687	12.3161	11.6797	11.5945	11.9477
RBP31	AT4G24770	AT4G24770	12.4785	12.7008	13.0497	9.84013	10.0243	9.52374	11.2734	10.7892	11.4267	12.9715	12.7675	12.8135	11.0589	11.8056	11.788	12.0322	11.1927	11.8854	12.7366	12.5536	12.5881	11.3999	12.0762	11.1537	11.1415	10.4404	11.9928	11.9231	12.0674	11.2284	9.30073	9.89686	9.34661	11.8714	11.8025	11.3416	11.9591	12.6257	12.473	11.9081	10.9823	11.6221	11.4392	11.6473	11.5977	12.76	12.9284
FBR12	AT1G26630	AT1G26630	12.4327	12.48	13.1944	12.7553	12.9903	12.8282	12.613	12.6656	12.4412	13.146	12.8813	13.1799	12.8999	12.5984	12.5319	12.6825	12.6996	12.668	13.0383	13.018	13.1191	12.5487	12.7504	12.5518	12.8516	12.6791	12.7898	12.7508	12.6058	12.7233	12.7329	12.7441	12.6531	12.5158	12.6013	12.7751	12.1511	12.7869	12.7392	12.659	12.4515	12.5465	12.6265	12.2701	12.5142	12.8041	12.7913
LEA7	AT1G52690	AT1G52690	3.79798	3.95901	3.18603	10.754	10.8696	8.27869	5.33884	8.17262	8.71989	3.89809	3.51298	3.87082	6.78832	2.42506	3.81642	2.94065	4.41387	3.00988	3.42675	2.77939	3.97545	4.33443	3.56015	4.6009	3.2669	5.28303	3.50204	5.15642	5.68303	11.2359	10.4645	12.1197	14.4673	6.5034	4.86475	13.5577	2	2.24104	2.26384	2	5.60832	2.22101	2.94207	2.60576	2	2	2
AT3G47070	AT3G47070	AT3G47070	13.0735	12.8121	12.4898	9.36284	9.9128	9.49983	10.6206	9.75373	11.5949	12.8918	12.9805	12.39	10.7341	11.1253	10.1614	10.4512	11.2768	10.2754	12.2163	12.1814	12.0034	10.3855	10.2235	10.5488	11.2421	9.32363	10.2191	12.5696	12.324	11.8258	9.03626	9.38359	7.5753	12.3819	12.5062	11.6789	12.5878	12.3585	12.5856	11.3093	10.807	10.7612	11.3199	11.6103	10.8555	12.4414	13.1014
FNR1	AT5G66190	AT5G66190	12.323	12.4936	12.3511	9.96184	10.4242	9.53555	10.7552	9.56881	11.2683	12.6744	12.7419	12.318	10.8496	11.424	10.7282	10.8897	11.0811	10.7166	12.4428	12.3544	12.1963	10.7407	11.2035	10.6768	11.4985	10.1752	10.8357	12.3299	12.4138	12.0971	10.1149	10.3044	9.81478	12.4285	12.4736	12.2829	12.6956	12.5617	12.7417	11.7514	11.167	11.42	11.3458	11.7059	11.2287	12.7241	12.9989
GSTF8	AT2G47730	AT2G47730	12.9212	12.5228	12.5332	10.2437	10.4399	11.3805	11.2759	11.7618	13.0997	12.5581	12.7486	12.6535	11.6848	10.653	11.8069	11.4837	13.0006	11.4037	11.7051	11.2951	11.8168	10.8901	10.4181	10.7706	11.0689	11.0879	11.2167	11.3819	12.0938	10.4346	10.4095	11.7451	8.73928	11.8067	11.6784	11.4672	12.7344	12.7315	12.5132	11.4178	12.1622	11.7244	12.2033	13.207	11.5377	11.9063	12.1871
ccsA	ATCG01040	ATCG01040	13.5665	13.5415	12.6236	10.7405	11.3234	11.2178	11.2924	10.7938	11.7916	12.9702	12.9905	12.1814	11.2603	11.1137	10.7631	11.4351	11.5224	11.1609	12.4751	12.8271	12.3037	10.3663	11.6001	10.4758	11.785	10.8684	11.1706	12.2846	12.182	12.4571	9.37394	10.7318	9.59444	11.9434	12.075	12.2721	11.2552	10.4368	11.2302	10.4697	9.72801	9.6651	9.89789	10.393	9.61111	10.3257	11.2894
RPS5A	AT3G11940	AT3G11940	11.0884	11.159	12.334	11.1968	11.4349	10.7331	11.9525	12.1959	11.4464	11.8279	10.9855	11.9044	11.9001	11.7658	12.0321	12.512	11.7209	12.5781	11.8349	11.6311	11.8941	11.6024	12.0654	11.3703	11.6973	12.09	12.6806	11.064	10.7873	11.1592	10.951	11.4283	11.137	10.8706	10.9443	11.1829	10.922	12.1003	11.7371	12.0612	11.5925	12.0099	11.8427	11.8667	12.6781	12.149	11.9619
RD20	AT2G33380	AT2G33380	9.59549	9.44284	9.34384	13.3732	13.5087	13.575	10.1918	11.6778	10.5192	11.8226	12.9574	11.4884	10.564	8.6192	8.11052	8.86161	9.21127	9.67542	12.3384	12.3627	11.3574	9.4742	10.7733	10.7281	10.3894	10.2005	9.7018	12.1156	12.3452	11.3235	12.8291	10.994	12.1262	12.6545	12.246	13.0549	11.2548	9.9655	10.589	9.26311	10.194	9.91611	8.98485	9.47055	8.29247	8.94809	9.29556
PGK1	AT3G12780	AT3G12780	12.2996	12.5157	12.5445	9.98754	10.2847	9.90682	11.1593	9.67808	11.2429	12.5615	12.4836	12.3275	10.574	11.217	10.543	11.1959	10.9446	11.0627	12.2904	12.0796	11.9289	10.7444	10.9941	10.5502	11.3272	10.3413	11.1735	11.7921	12.0986	11.5383	9.51009	9.76997	8.81822	12.1933	12.0242	11.7541	12.4077	12.5342	12.8456	11.826	11.3341	11.5426	11.9122	11.8896	11.8572	12.8501	13.1081
AT2G01010	AT2G01010	AT2G01010	12.9498	13.6256	11.7933	12.786	12.8926	12.7815	12.4777	13.048	12.1965	13.2279	11.8849	13.4947	12.2768	11.497	11.9452	12.4495	12.1629	11.7617	12.1445	12.7481	12.6447	11.9483	11.755	11.7314	12.3245	12.2115	11.3933	11.619	12.3595	12.725	12.2038	12.1065	14.0615	11.5173	11.4463	11.9327	11.9986	11.4988	11.9668	11.7219	10.8432	10.8648	12.4654	11.8869	11.4251	11.4706	11.1129
AT3G22240	AT3G22240	AT3G22240	12.5265	12.4049	11.9739	11.2907	11.2163	11.2227	11.2377	10.6607	12.6218	12.4671	10.2123	11.6708	12.4634	11.7435	11.7135	11.0639	12.982	10.0964	11.2906	10.7152	11.7729	12.6698	10.4902	12.1869	13.1408	12.2633	10.1662	8.26517	10.6959	5.87788	8.5731	8.31799	7.51825	9.00689	8.59809	8.27834	11.4344	11.4952	11.9935	9.72152	12.0879	11.1752	10.7079	12.9334	9.81118	8.2103	11.0132
AT1G73600	AT1G73600	AT1G73600	10.1063	10.366	8.11059	6.30928	6.38137	6.53509	6.13706	6.17571	7.49521	10.6132	11.5619	9.89721	6.62491	7.26101	6.24562	8.10542	7.95688	7.88147	10.7671	11.4852	11.0856	6.57232	8.9254	7.77935	8.74532	7.29395	7.93258	12.788	11.8974	8.93682	6.06197	5.96502	6.56356	11.9699	12.6025	10.94	13.2783	10.5753	11.4564	9.27988	7.63716	8.77172	9.65443	9.79594	8.57531	11.0753	12.491
MTO3	AT3G17390	AT3G17390	11.6556	12.1008	12.6199	9.40542	9.54059	9.53163	9.51133	9.77731	11.2778	12.3871	11.7441	12.1989	11.3444	12.4902	11.6108	12.3546	11.8673	11.1791	12.1257	12.2381	11.8702	10.3743	12.5097	10.363	12.0114	11.149	12.1922	11.4729	11.2171	9.6552	9.02444	9.26079	7.97571	11.0376	11.523	10.4585	12.0877	12.3607	12.3301	12.1803	10.917	11.6916	11.4955	11.8141	11.6884	12.7759	12.8112
AT3G02080	AT3G02080	AT3G02080	10.8728	10.97	12.1077	11.6206	11.6689	10.9368	12.4201	12.5299	11.4931	11.6097	10.7233	11.5814	11.985	11.8919	11.9457	12.4856	11.7348	12.7818	11.5051	11.4845	11.5671	11.7076	11.9665	11.4138	11.633	12.094	12.7176	10.6492	10.2591	10.6313	10.5927	11.1462	10.6632	10.2495	10.485	10.7055	10.2658	11.2858	10.9314	11.5501	10.9995	11.4921	11.3065	11.318	12.4132	11.2766	11.2108
AT5G20190	AT5G20190	AT5G20190	10.7606	10.2283	9.73263	10.2564	10.3107	10.7736	10.1535	9.6655	9.92021	12.976	13.9626	12.292	10.916	9.91397	9.80459	10.9515	11.2845	11.0036	11.9976	12.6574	11.1752	10.5487	11.6991	10.4492	11.4458	11.6508	10.9645	11.1715	10.6362	10.9386	9.94142	10.2122	9.2666	10.8893	11.008	11.0435	11.0684	9.39489	9.90203	9.29974	9.56843	9.06359	9.85145	9.8686	10.0548	9.54776	9.73065
APS1	AT3G22890	AT3G22890	11.5031	11.4545	10.4759	10.6109	10.6101	11.0247	11.9879	11.7759	11.3342	11.5637	12.413	11.4628	11.01	10.6157	10.516	11.8932	12.0325	11.7991	11.7723	11.7675	11.4401	10.9145	11.4159	10.6008	12.1025	12.0148	11.8889	11.7675	11.5222	10.9686	10.2929	11.6571	10.2378	11.6324	11.8998	11.261	12.0772	10.7801	11.0954	11.1647	11.3286	11.2086	12.0754	11.6275	11.7268	11.1021	11.4853
CORI3	AT4G23600	AT4G23600	7.5746	6.76979	6.84803	10.4314	10.5694	9.13609	8.22603	7.90789	6.87544	10.364	12.1875	10.3887	10.6242	9.19926	8.24852	10.4693	9.25522	10.2144	12.9417	13.1396	12.3979	9.38183	12.2944	9.95103	11.6812	11.1731	11.4299	10.8118	10.1842	11.3624	10.2101	11.3814	9.87282	11.5921	10.7677	11.9249	10.0628	7.17379	7.59567	9.9628	9.71765	8.63182	8.84387	8.64585	9.11265	7.35847	6.27261
PSRP5	AT3G56910	AT3G56910	12.5458	12.5971	13.512	10.0813	10.6881	9.86375	11.3952	10.754	11.4768	13.2312	12.5878	12.9278	11.0082	11.7816	11.3736	11.7231	11.217	11.5882	12.6273	12.3389	12.373	11.0367	11.7908	11.0928	11.1619	10.162	11.8713	11.4803	11.712	11.109	9.58976	9.80874	8.46518	11.5121	11.5536	10.9891	11.2693	12.1464	12.0547	11.414	10.3012	10.8472	10.8443	11.1212	11.0618	12.3298	12.7338
AT4G16720	AT4G16720	AT4G16720	10.7384	10.9011	12.0547	10.4739	10.7654	10.0781	11.5471	11.5281	10.5798	11.7958	11.1165	11.517	11.369	11.4412	11.5214	11.9871	11.0503	12.19	11.912	11.8677	11.917	11.0696	11.6933	10.7331	11.3172	11.8113	12.2553	11.042	10.4355	11.0878	10.668	11.3478	10.1975	10.4652	10.7419	11.1363	11.07	12.0596	11.6659	11.7902	11.1565	11.6242	11.4498	11.5181	12.9646	11.9811	11.981
GSTF6	AT1G02930	AT1G02930	8.91573	7.51611	9.92053	12.7871	12.8861	13.0605	10.7558	10.3396	11.8623	10.2205	9.06563	9.25659	12.8565	10.4404	11.3106	7.77328	11.7218	8.01562	9.23558	7.23709	9.19428	10.8168	8.25114	11.0521	10.7243	11.7719	8.76623	4.33901	4.85699	5.66446	12.2886	12.9112	13.2676	8.32402	4.67499	7.12087	8.14144	8.89064	8.90443	11.3677	13.1088	12.0159	10.0156	12.507	10.0775	5.12879	4.74156
AT4G27090	AT4G27090	AT4G27090	11.7465	11.8166	12.8304	11.7113	11.9189	11.3396	12.5022	12.5628	11.6781	12.4078	11.7836	12.4798	12.1031	12.0731	12.1517	12.6876	11.9661	12.6539	12.3304	12.2257	12.4921	11.8853	12.1851	11.5662	12.1372	12.0107	12.8432	11.8306	11.6445	12.0106	11.3182	11.7025	10.7038	11.6087	11.7022	12.0393	11.0332	12.049	11.7256	11.7589	11.2735	11.6509	11.5813	11.5311	12.265	12.0749	11.9569
AT4G17390	AT4G17390	AT4G17390	10.6463	10.9709	12.248	9.19646	9.52957	8.67015	11.0061	11.0113	10.1502	11.7376	10.7015	11.5735	10.3082	10.7978	10.8495	11.6856	10.3796	12.1741	11.7989	11.6457	11.801	10.3239	11.2048	9.96572	10.5403	11.6365	12.2167	10.3709	9.95921	10.2617	9.72	10.0837	8.91532	9.98512	10.1847	10.2887	10.6249	12.0527	11.6691	11.1071	10.1978	10.9766	10.5034	11.1207	12.8426	11.9753	11.896
SAC52	AT1G14320	AT1G14320	11.1537	11.5007	12.4824	11.86	12.0248	11.415	12.2794	12.1964	11.2514	12.4403	11.6126	12.332	11.9537	11.767	11.6549	12.3303	11.8017	12.524	12.4129	12.2177	12.3755	11.6079	11.9121	11.5524	11.9802	12.315	12.5171	11.5283	11.0946	11.6841	11.614	11.9466	12.0764	11.0854	11.3231	11.4487	11.2909	12.2695	12.0598	11.8436	11.5587	11.7005	11.7302	11.6768	12.7673	12.2934	12.2042
AT2G37220	AT2G37220	AT2G37220	12.1524	12.2114	12.8293	10.0813	10.5404	9.82578	11.4104	10.7728	11.1993	12.5049	12.3424	12.3962	11.4695	12.1771	11.6673	11.9565	11.2916	12.0234	12.2288	12.0511	12.1439	11.5282	11.9824	11.5036	11.219	10.6532	12.0598	12.3813	11.9235	13.252	11.3399	11.3257	11.0314	12.0194	12.1578	12.209	11.9049	12.6308	12.4271	11.9681	11.2954	11.7529	11.7229	11.7077	12.2287	12.5877	12.674
AT1G76600	AT1G76600	AT1G76600	10.8665	10.0274	7.66492	6.80186	7.41184	9.40859	8.04662	8.47332	8.03027	10.0329	10.185	10.4143	8.71741	7.60362	8.83513	7.3988	7.80088	8.34137	8.64732	8.65989	9.02703	8.49117	5.38761	8.20443	5.56677	13.5434	6.64867	7.97052	9.7572	6.17557	6.63867	7.52635	8.28023	8.436	8.04821	6.28337	8.2914	8.66104	7.35519	6.1887	7.24805	7.87715	6.74394	7.05963	7.88998	8.27358	8.26969
MSRB6	AT4G04840	AT4G04840	10.3917	10.5204	10.5563	5.10766	5.01546	7.40409	7.30296	6.41098	9.72842	12.4831	12.7041	11.7504	7.49376	7.00804	8.35237	10.3702	10.354	9.81726	12.9495	12.9369	12.6778	10.1868	11.839	7.91533	11.6165	10.7996	10.7097	7.95172	8.79216	5.8331	5.08649	3.99019	5.65012	7.73092	7.01883	6.90537	9.30703	10.0491	10.1433	9.20987	8.13078	7.78052	9.03436	9.44917	8.56733	10.7545	11.2908
RPL23AA	AT2G39460	AT2G39460	10.7412	11.0239	12.2622	10.7268	11.0957	10.2215	12.1297	11.791	10.8846	11.965	11.1982	11.8075	11.3415	11.5999	11.2043	12.2382	11.3885	12.3947	11.9187	11.7577	11.994	11.1651	11.6338	10.9343	11.6392	11.6968	12.4398	10.9538	10.5567	10.882	10.5914	10.9469	10.029	10.5685	10.7843	10.688	11.0506	12.0811	11.816	11.8192	11.281	11.5369	11.6122	11.4985	12.6443	12.054	12.1276
RPE	AT5G61410	AT5G61410	12.143	12.2554	12.0736	10.7006	10.8282	10.6359	11.0823	10.6156	11.3914	12.2481	12.4457	11.9127	10.9869	11.2676	10.9384	11.244	11.1403	11.1498	12.0129	11.9	11.7632	10.932	11.3565	10.8788	11.2436	10.4246	11.1253	11.9167	11.8146	11.7344	10.0999	10.3803	10.0939	11.9263	11.8261	11.5815	12.729	12.7141	12.7377	11.9737	11.7339	11.7362	11.9964	12.1671	11.9071	12.7532	12.9171
AT5G62350	AT5G62350	AT5G62350	8.69779	8.83915	8.62103	4.77124	5.38519	5.59602	6.30618	7.40116	7.32748	11.9074	12.1415	11.5553	8.53506	9.27781	9.47715	10.0828	9.17868	9.4176	12.9666	13.2184	11.943	9.8616	12.131	9.15119	10.641	9.39882	10.8692	9.63593	9.72525	9.92293	5.71519	5.63182	6.24981	9.57881	9.52744	8.59889	9.53765	9.87228	9.36585	9.78514	8.39754	9.31676	8.50649	8.42419	8.16597	9.73553	9.83616
BCS1	AT3G50930	AT3G50930	9.26074	8.68976	6.74202	7.65262	7.77755	9.302	8.92743	9.95945	9.32883	9.89643	9.7937	9.83141	9.96143	7.98545	9.0252	8.72786	9.6189	10.1097	8.67936	8.46014	8.78509	8.83565	7.1047	8.70742	8.01102	13.506	8.47928	6.94663	8.71145	4.33429	7.76899	8.58696	8.33907	7.29377	6.34985	5.13206	8.34384	7.95654	7.13395	6.85839	8.27916	7.89732	9.34185	8.80691	10.5371	6.22554	5.8351
PSB27	AT1G03600	AT1G03600	12.4872	12.6104	12.8249	8.95724	9.31949	8.91282	10.8988	9.91762	11.4704	12.9787	12.7255	12.8416	10.2155	11.0767	10.6802	11.0175	10.8578	10.8086	12.3519	11.9191	12.3882	9.95646	10.6527	9.85507	10.8571	9.26765	10.8419	12.1228	12.3255	11.8883	8.95559	9.46474	7.67002	12.2112	12.1626	12.1215	11.8284	12.2329	12.0484	10.9816	10.0444	10.4388	10.4489	11.0944	10.3687	12.2929	12.4634
NIA2	AT1G37130	AT1G37130	12.8312	12.8744	11.419	11.9549	11.6748	11.3696	10.6987	10.02	11.4994	11.7102	12.6647	11.036	11.4184	10.9555	10.7163	11.2317	10.8712	11.24	12.2957	12.8855	11.7755	10.9884	11.6772	11.2129	11.3371	11.3154	10.6332	12.7097	11.5733	11.1467	9.23389	10.1072	10.4904	11.4821	12.0819	9.87299	13.1331	12.1591	12.3692	11.0477	11.6097	11.1153	11.5326	11.6792	11.3995	11.7547	12.2287
PSAE-2	AT2G20260	AT2G20260	12.892	12.8009	12.8059	9.97217	10.4633	10.2905	11.4208	10.8393	12.0006	13.0897	13.1492	12.7283	11.1104	12.1289	11.2595	11.5721	11.4844	11.3517	12.8603	12.4898	12.6375	11.2915	12.1392	11.2511	11.6352	10.5612	11.3732	12.1423	12.5431	12.009	9.29746	9.98555	8.66894	12.2804	12.2891	12.2192	11.9416	12.0554	11.8893	11.5512	10.8855	10.9823	11.0143	11.4079	10.8697	12.0425	12.5312
AT5G19240	AT5G19240	AT5G19240	13.322	13.0246	11.6389	10.4848	10.5033	11.887	10.9729	10.3725	11.9503	13.3438	13.5712	12.8838	12.3093	11.1048	11.6044	11.8096	12.1874	11.6301	11.0127	10.9136	11.2941	11.2442	9.57014	11.0412	10.4726	11.1653	9.43671	10.7967	12.0323	6.63279	8.31955	8.5795	6.50603	10.7465	10.7083	7.37552	11.7268	11.3994	10.8622	9.64335	11.8386	10.3848	10.6771	11.7315	9.7534	10.0902	10.6442
GUN4	AT3G59400	AT3G59400	12.8507	12.83	12.6582	9.58791	9.92967	9.90985	10.5868	9.82787	11.731	11.8771	12.1083	11.7975	9.81955	10.7878	10.3572	10.3087	10.0571	10.1212	12.3403	12.5302	12.1754	9.8887	10.8862	9.86406	10.7768	9.57373	10.2051	12.3116	12.4046	11.9117	8.98434	9.65586	6.77315	12.378	12.2143	11.8615	12.307	12.2939	12.0079	10.9374	10.2942	10.3537	10.3423	11.2701	10.5594	12.2462	12.4102
TLP18.3	AT1G54780	AT1G54780	11.7241	11.8909	11.5587	9.06741	9.31949	9.1819	9.7028	9.31859	10.8597	12.1939	12.4995	11.9117	9.99156	10.4	9.67038	9.87248	10.4982	9.45836	11.9354	11.7928	11.9027	9.71786	9.93267	9.66235	10.8306	9.0463	9.54279	12.3102	12.4529	11.9769	9.64482	9.432	7.53273	12.4327	12.4069	12.0321	12.4971	12.3147	12.3595	10.9209	10.5472	10.6686	10.7418	11.2545	9.90843	12.3816	12.6295
RPS13A	AT4G00100	AT4G00100	10.6626	11.0086	12.0885	10.0253	10.1544	9.67377	11.4702	11.1149	10.6751	11.6705	10.9488	11.6322	10.9699	10.9415	11.0036	11.9528	11.1801	12.1787	11.5823	11.4863	11.7023	10.5302	11.292	10.2441	11.304	11.5312	12.3539	10.8805	10.4735	10.9738	10.1926	10.9162	9.72623	10.3647	10.6076	10.8292	10.7959	11.8513	11.5114	11.3312	10.8088	11.1706	11.4567	11.448	12.7703	11.804	11.7965
TAT3	AT2G24850	AT2G24850	6.84115	5.18368	6.04947	10.4088	10.5531	11.1832	8.97212	6.80896	9.14838	11.2085	10.9488	10.9424	12.0849	8.95023	9.84867	9.8554	12.5257	9.87551	10.7978	10.0043	10.7855	12.1396	10.0434	11.0521	13.1904	12.8128	9.99836	3.94174	4.00534	4.33429	7.34385	8.14696	7.05971	5.10556	3.57289	3.72643	7.86345	5.17014	5.63669	8.93721	12.0204	10.4948	10.3283	10.8073	8.31649	3.41147	2.96199
ENODL2	AT4G27520	AT4G27520	11.1816	11.2134	11.4995	9.9224	10.0059	9.4632	9.32372	9.29917	10.7065	12.1168	12.5655	11.4196	10.3007	10.1705	9.67483	10.5732	10.1232	10.6659	12.9722	13.0293	12.0176	9.62957	11.7867	9.29776	10.8652	10.2403	11.1534	12.0823	11.8541	11.5513	10.0288	10.6822	7.98627	11.7695	11.6701	12.393	10.7865	11.6301	11.6202	10.6731	10.3038	10.0883	10.2184	11.3773	10.4728	10.8487	11.2038
RPL12-C	AT3G27850	AT3G27850	12.4131	12.4934	12.9883	9.39393	10.0059	9.47142	10.8642	10.3301	11.368	12.8024	12.4561	12.7435	10.8932	11.6327	11.1981	11.9123	11.2816	11.6109	12.6221	12.2764	12.4252	10.8215	11.8547	10.6008	11.2097	10.1165	11.8849	11.8212	11.7319	11.4723	9.60306	10.0744	8.4727	11.7245	11.7511	11.1449	11.7225	12.3633	12.3061	11.7595	10.7755	11.2625	11.3745	11.4473	11.338	12.5266	12.6876
JAR1	AT2G46370	AT2G46370	9.22933	8.92395	8.35044	9.37847	9.35739	9.53555	8.9784	8.63694	9.25424	12.5411	13.6799	11.5249	9.21561	8.46548	8.64372	9.80053	10.3291	10.0911	12.3092	12.8294	10.4845	9.85932	11.1606	9.38781	10.9415	10.5196	9.62735	9.44243	8.97861	9.3181	8.70725	8.73522	8.01748	8.8397	9.15281	9.06476	9.23665	7.96916	8.22197	8.28249	8.67444	8.28807	9.00362	8.71913	8.14734	7.68762	8.04648
PR1	AT2G14610	AT2G14610	4.35865	4.49075	3.0145	13.7387	13.879	12.5223	9.44191	8.01493	10.3643	4.3043	3.64101	3.07536	12.1853	10.06	8.5928	3.76147	8.20612	2.88345	3.20989	3.1723	4.04544	12.0752	4.65299	11.9382	9.42612	10.7269	4.54668	3.14917	3.3262	5.87788	5.75387	7.54943	6.84451	2.96415	3.57289	3.03533	3.45407	4.91581	7.60759	9.92066	13.0517	12.1275	8.87817	9.20405	6.66373	3.76464	4.05657
AT5G54940	AT5G54940	AT5G54940	12.392	12.2254	10.7318	12.0086	12.3078	12.9721	11.5615	11.4318	11.7294	13.2195	13.8199	13.0825	12.3843	11.5401	11.388	11.2773	12.6422	11.4692	11.7501	12.2255	11.4659	12.0083	11.0207	12.3771	11.7551	11.8851	10.1655	12.1327	12.4017	12.0143	12.0908	11.512	12.172	11.977	12.0498	11.5201	11.6901	10.5559	10.9014	10.8999	11.3931	11.0251	11.1398	10.3937	10.0304	10.3961	10.8802
AT2G41730	AT2G41730	AT2G41730	5.50109	5.03911	5.34793	6.80186	7.44351	8.40423	10.25	10.8505	7.15598	5.19875	5.11783	4.65874	8.67161	6.71997	9.25992	9.33069	6.48481	10.6575	5.05596	5.70041	5.10844	7.50711	6.59142	8.22551	7.59744	13.3302	9.44323	4.65018	4.81346	4.05122	6.03081	8.167	10.5307	4.66109	5.00041	4.37804	6.05816	5.19899	6.90189	6.29808	6.67124	7.14705	7.49305	5.93187	11.7729	4.48834	4.67173
AT1G70600	AT1G70600	AT1G70600	11.2211	11.4816	12.6399	10.4277	10.942	10.0092	11.1639	11.4634	10.7002	12.2466	11.4107	12.0624	11.5012	11.5703	11.5423	12.3294	11.414	12.2802	12.3275	12.3287	12.3947	11.1009	12.0201	10.712	11.5795	12.1279	12.5847	11.3894	10.7838	11.1934	11.0171	11.4723	11.3224	10.9455	11.1849	11.147	10.9011	12.0116	11.6363	11.4753	10.9305	11.2151	11.1199	11.2676	12.229	11.9486	12.0651
AT3G53430	AT3G53430	AT3G53430	11.4142	11.6309	12.5212	11.2477	11.5032	10.5781	11.7224	11.6722	11.2048	12.2885	11.7657	12.0116	11.6498	11.954	11.9041	12.2656	11.555	12.3047	12.584	12.5839	12.3221	11.6612	12.275	11.1872	11.9421	12.297	12.5096	11.3585	10.835	11.1856	11.027	11.4788	11.0199	10.8962	11.2065	11.2421	11.058	11.9981	11.7614	11.8613	11.3311	11.6598	11.2845	11.3403	12.322	11.9099	11.9945
AT2G44120	AT2G44120	AT2G44120	9.64692	10.029	11.367	10.1512	10.438	9.20673	11.4743	11.6039	10.0236	10.9954	9.86427	10.824	11.1317	11.2515	11.7254	11.7603	10.6659	12.2921	11.2574	11.3786	11.1486	11.0577	11.5949	10.6274	10.8683	12.4173	12.2645	9.59713	9.12823	9.67911	9.88154	10.5396	10.2334	9.24255	9.40134	9.6225	9.19729	10.7813	10.3095	11.055	10.24	11.1239	10.3795	10.681	12.6293	10.7018	10.678
STZ	AT1G27730	AT1G27730	12.4395	11.4545	8.42513	8.66395	9.35739	10.8418	9.34976	10.477	9.31258	12.0914	12.7153	12.2412	10.9499	10.1181	9.98596	8.1131	9.3002	9.29102	11.0742	11.1535	10.6918	9.40079	8.30293	9.07192	7.96999	13.1982	7.9571	11.1366	12.0411	8.70489	8.9135	8.58323	11.3471	11.1104	10.6858	7.81808	10.7519	9.8801	8.92601	6.96175	8.45484	7.78052	9.734	8.7934	8.52466	8.87969	8.73956
HEMA1	AT1G58290	AT1G58290	12.3174	12.3691	11.9979	9.85137	10.1033	9.74671	11.1772	10.4287	11.3991	12.3647	12.5701	11.9516	10.6819	11.0083	11.1597	11.5303	11.4359	11.6728	11.9824	12.0141	11.9607	10.5656	11.3312	10.3757	11.1548	10.3551	11.3837	10.9726	11.1585	9.5725	8.38877	8.91775	9.15874	11.1583	10.9739	8.71298	12.5061	12.5083	12.307	11.5785	11.192	11.3976	11.5582	12.1246	11.785	12.3957	12.6185
LEA4-5	AT5G06760	AT5G06760	5.27362	4.15883	3.18603	9.9383	10.386	7.47121	5.17373	7.99897	7.22705	4.62091	4.87902	2.73496	6.27895	4.14609	5.20111	4.10763	4.60714	4.56065	3.9313	3.88226	4.176	4.85779	3.56015	5.37983	4.20682	5.85927	4.41124	8.54779	7.91732	11.7083	10.7043	11.0409	11.0741	8.44232	8.24205	13.7276	5.9176	4.84455	5.87238	3.6574	5.1953	3.57848	4.28374	5.14187	3.75227	2	2.70664
RS27A	AT3G61110	AT3G61110	11.6227	11.5127	12.6577	11.4846	11.9104	10.9764	12.1421	12.2701	11.262	12.4152	11.6262	12.3105	11.9199	11.8893	11.791	12.5537	11.7638	12.5661	12.2106	12.2488	12.2884	11.3975	11.8057	11.4441	11.9096	12.2722	12.6633	11.8507	11.2254	11.9584	11.4906	11.8461	10.6417	11.282	11.5809	11.8612	10.7902	11.7607	11.4531	11.5152	11.0234	11.1502	11.3153	11.1629	12.0411	11.7463	11.8498
SRC2	AT1G09070	AT1G09070	12.4348	11.8585	9.97126	10.4277	9.95735	12.3015	10.653	10.6025	11.0296	12.7769	13.4413	12.6167	11.9756	11.2203	11.4458	11.7297	12.4301	12.2118	11.3095	11.5109	11.2433	11.4933	9.88079	12.2314	9.83821	12.6979	9.6771	11.5492	12.19	9.50631	9.75617	9.90583	9.6847	11.3955	11.4351	9.70319	10.9425	10.9912	10.1351	10.1658	11.4731	10.8384	9.96432	10.1549	9.97333	10.948	10.9892
SAM-2	AT4G01850	AT4G01850	10.5479	10.5891	11.1773	10.6866	10.2847	10.6119	11.0789	11.3029	11.1476	12.0809	12.7271	11.8655	11.0473	11.2368	11.2692	11.6474	11.9229	11.677	12.6927	12.8971	12.0694	11.7526	12.4102	11.171	12.2788	11.738	12.2177	10.5964	10.9266	10.5032	10.2376	10.7814	10.0162	11.0501	10.6617	10.7554	10.3655	10.9199	10.7973	10.8874	10.8861	10.9818	11.0653	11.4587	11.1014	11.0337	10.6802
RPS15A	AT1G07770	AT1G07770	11.5907	11.6942	12.8159	11.3817	11.8251	10.7636	12.2439	12.3082	11.6661	12.1208	11.315	12.1806	11.8996	11.8001	12.0799	12.3819	11.6897	12.4671	11.8488	11.6386	11.9926	11.5623	11.9373	11.2925	11.8246	11.6859	12.6702	11.2273	11.0223	11.3945	10.5356	11.4464	10.0792	10.91	11.0619	11.4046	10.7239	11.8376	11.6254	11.995	10.992	11.6538	11.5127	11.5037	12.0291	11.7032	11.7158
RPL16B	AT4G18730	AT4G18730	10.9117	10.9373	12.1491	10.4556	10.9379	9.85121	11.923	11.9121	10.694	11.552	10.6811	11.3376	11.1181	11.1244	11.1308	11.9342	11.1481	12.2833	11.5103	11.6101	11.5563	10.7357	11.3687	10.4417	11.3362	11.9243	12.3818	10.8085	10.1496	10.9159	10.3221	11.2188	10.1769	10.1458	10.5333	10.7596	10.3417	11.4617	11.1185	11.3488	10.7116	10.978	11.0791	11.1864	12.6547	11.3222	11.4275
UBC8	AT5G41700	AT5G41700	12.9977	12.3735	11.388	11.5789	11.7191	11.9023	12.0624	12.169	11.7371	11.6657	12.685	11.2945	11.5374	11.4154	11.2151	11.9525	11.471	11.9092	11.4337	11.8361	11.4872	11.2468	11.3669	11.3489	11.5738	11.1373	11.3296	12.921	12.7037	12.9393	11.347	10.8855	9.9691	12.2599	12.6502	12.8802	12.2625	11.3216	11.1672	11.1062	11.1052	10.959	11.487	11.0856	11.3087	11.0836	11.4719
PTAC16	AT3G46780	AT3G46780	12.0628	12.3681	12.0756	7.86723	7.57799	8.01187	11.1324	10.0895	11.231	12.5584	12.5478	12.3148	9.71957	11.4269	11.112	12.2705	10.9521	12.051	12.4334	12.2488	12.2163	10.9853	12.0332	10.4991	10.9804	10.3295	12.0975	11.2017	12.0499	10.6992	6.67942	7.53408	6.82112	11.9212	11.5268	11.1113	11.8339	11.8367	11.5221	11.2025	10.2951	11.1066	10.8026	11.3168	11.5479	12.0445	12.0766
AT1G54410	AT1G54410	AT1G54410	12.0717	12.2455	12.1549	12.1348	12.3366	12.5024	11.7086	11.2089	11.7894	12.3978	12.6924	12.2692	12.0996	11.7777	11.8435	11.5343	11.7722	10.9474	12.5409	12.7058	12.4307	10.9936	12.167	11.2673	12.2371	11.0887	11.5975	12.6061	12.6782	12.9201	11.3767	12.2907	13.8516	12.6776	12.8121	12.7856	12.1209	11.7892	11.909	11.7102	12.004	11.5452	11.9	11.356	11.1732	11.6449	11.9122
UBQ6	AT2G47110	AT2G47110	11.4656	11.4652	12.4393	11.3304	11.5476	10.887	11.9483	12.0987	11.2278	12.1109	11.4915	11.9778	12.0224	11.8976	11.9663	12.5222	11.5973	12.6109	12.1199	12.1567	12.1583	11.6866	12.2128	11.3719	11.7745	12.2201	12.6722	11.6891	11.1509	11.636	11.1335	11.6725	10.4643	11.2143	11.4106	11.6596	10.8753	11.6702	11.4523	11.5812	11.1047	11.3833	11.2686	11.1877	12.1437	11.6827	11.6679
XTH24	AT4G30270	AT4G30270	11.3251	10.2627	8.62848	13.3642	12.944	13.1835	11.4018	11.9041	9.83178	10.2947	11.1818	8.90058	13.1431	12.2848	11.2998	11.3808	11.5734	10.4375	9.98376	10.4544	9.43006	12.7864	9.5053	13.5534	11.7202	12.5793	8.80389	10.0809	8.59415	9.83199	10.663	8.61275	6.82112	9.15092	9.76508	8.00416	11.3173	8.73679	9.9296	10.9134	11.6157	12.1345	10.7774	9.01716	10.7412	7.72332	8.64707
GASA1	AT1G75750	AT1G75750	11.4882	11.5099	11.1906	14.1193	13.5407	9.97201	10.8687	8.5188	9.88494	9.29792	10.9885	8.94534	12.1799	11.2962	9.82078	9.53474	10.3507	9.3609	10.6951	11.6483	9.38184	10.8436	9.99697	11.1509	12.2197	10.9301	8.84225	8.7271	7.77706	8.93682	9.81451	7.83263	6.17796	7.97727	8.53524	6.71094	11.9989	11.4468	12.8807	11.2758	11.6815	10.1569	10.764	10.2371	11.4259	9.41996	10.2997
AVP1	AT1G15690	AT1G15690	12.8989	13.0973	12.7873	11.0447	11.0488	11.0646	11.8459	10.9061	11.9529	12.0412	11.933	12.0362	11.4404	11.8161	11.4498	11.838	11.4757	11.6871	11.9464	11.8889	11.9471	10.9748	11.43	11.1436	11.4697	10.537	11.8869	12.0817	11.8938	11.6316	11.2674	11.3926	11.1973	12.0056	12.0658	11.3993	12.3877	12.6777	12.7914	11.9621	11.4341	11.6939	11.5422	11.9328	11.9953	12.6058	12.5839
AT2G41840	AT2G41840	AT2G41840	11.2131	11.3702	12.4567	9.8373	10.0059	9.64862	11.3309	11.6487	11.1034	11.982	11.0467	11.7867	10.8721	10.9889	11.4914	12.1225	11.3177	12.1888	11.8944	11.8299	11.9907	10.6124	11.4288	10.3097	11.2019	11.6789	12.4937	10.955	10.4665	11.089	10.0962	10.881	10.5698	10.5043	10.6352	11.0458	10.6939	11.8705	11.5841	11.2649	10.4581	11.1187	11.0148	11.4926	12.3433	11.8848	11.8118
GOX2	AT3G14415	AT3G14415	12.4205	12.4344	11.7682	10.269	10.2038	9.68442	11.2117	10.0318	11.1703	11.9291	12.2687	11.6914	10.7919	11.2195	10.4654	10.7835	10.9281	10.8184	11.2139	11.0009	11.122	10.523	10.2127	10.4685	10.7768	9.55615	10.3504	12.303	12.072	11.9992	10.6906	10.3555	8.56009	12.1473	12.287	11.3803	12.7796	12.3235	12.6247	11.6965	11.4631	11.3747	11.5181	11.5626	11.4576	12.4745	12.737
AT1G07940	AT1G07940	AT1G07940	10.6493	10.9988	11.6541	10.837	10.8826	10.9516	11.6587	11.6865	11.1361	11.6881	11.3622	11.8217	11.1889	11.3017	11.3163	12.1031	11.8467	12.3162	11.908	11.9466	11.8971	11.4217	11.4422	11.3091	11.8512	12.2928	12.3068	11.4438	11.1982	11.5348	11.4827	11.8143	11.6794	11.3733	11.3626	11.5913	10.7896	11.6677	11.3777	11.1981	11.373	11.2461	11.8363	11.5636	12.6383	11.7482	11.5143
ROC3	AT2G16600	AT2G16600	10.4474	10.2045	10.7379	12.4872	12.7077	12.3685	12.4346	12.4315	12.3566	11.2861	10.5051	11.3066	12.8937	12.0967	11.9618	11.7387	12.6673	11.6853	11.4658	11.2043	11.7334	12.4505	11.43	12.3296	13.127	12.5154	11.9513	10.8319	10.9712	10.727	11.9142	12.3505	12.187	11.1384	11.2514	10.7638	10.7757	10.6555	11.0305	11.5173	12.0548	11.8373	12.5389	11.9542	11.6559	10.6457	10.7012
SAG29	AT5G13170	AT5G13170	5.14484	4.15883	3.47787	10.3124	11.394	7.55096	5.36461	5.45403	4.6782	4.81976	4.77121	3.78071	6.75357	5.77369	3.81642	5.42568	5.88274	4.85826	3.85854	5.34115	3.97545	5.18381	4.9928	8.58767	7.29185	5.07307	5.38183	10.1161	7.81066	13.1489	12.4774	12.9901	10.9515	9.40678	10.1404	12.8995	4.88348	3.89829	4.32578	5.55733	4.93388	4.76429	5.81581	3.5426	5.76914	4.11108	5.04753
CYP79B3	AT2G22330	AT2G22330	7.73976	7.80402	5.83418	7.88921	7.60625	7.7932	11.4598	10.7348	9.49281	10.6518	11.3257	10.6296	9.54006	8.95023	9.91235	11.9811	11.2845	11.8377	12.0399	12.0705	11.38	10.703	12.2419	9.24022	11.8201	11.5855	11.9355	7.49334	8.36459	6.60642	6.96965	7.60189	7.26439	8.58634	7.63392	6.15326	8.3541	7.23777	6.78074	9.22726	8.96916	9.49944	10.6113	9.32791	11.3262	7.08034	7.27066
CP5	AT1G64720	AT1G64720	11.5104	11.6647	10.9229	9.89277	9.99791	9.54337	11.6951	10.7504	10.8722	11.1193	11.8414	11.0415	10.6819	11.6829	11.4028	11.7858	10.9137	12.0902	10.461	10.527	10.8115	11.4515	11.7405	11.0687	10.7814	10.4702	11.8933	11.4737	11.8544	11.7299	9.85288	9.60168	8.77016	11.4725	11.619	11.0798	12.101	11.833	11.8018	12.0229	11.3518	12.1358	11.3625	11.6426	12.1049	11.7966	11.6413
AT3G16370	AT3G16370	AT3G16370	12.7275	13.066	12.3457	5.03062	4.73746	8.45486	8.65202	8.5683	11.4667	12.3527	11.876	12.2287	8.03222	10.7618	11.1989	11.5962	11.2126	11.0871	11.8086	10.9254	12.1822	8.95158	11.3436	9.53301	10.4236	8.675	11.1774	10.8655	11.9769	9.63252	4.7463	5.76922	5.75261	11.5285	11.714	11.1513	12.1371	12.633	12.2967	11.4625	10.0609	10.6849	11.2539	11.2834	10.7314	12.3788	12.6338
JAZ6	AT1G72450	AT1G72450	9.92698	9.73062	8.36836	8.90963	8.89033	10.1794	8.85883	8.23526	8.57758	13.1051	13.7069	12.6236	10.7251	9.06173	9.12307	11.2938	11.3929	11.0672	11.4084	11.2187	10.7466	10.2717	10.6901	9.52169	10.6323	10.7749	10.2223	9.85159	10.6556	8.24405	7.45366	7.54178	7.65686	10.331	9.05101	7.62295	10.1635	9.22643	9.28462	9.02136	9.18019	8.72281	8.88493	8.40359	8.61653	9.27801	9.72635
UBQ5	AT3G62250	AT3G62250	11.1252	11.3467	12.4564	10.9327	11.1386	10.374	11.8068	11.7806	11.0159	11.9478	11.2487	11.92	11.6253	11.78	11.6656	12.2346	11.4695	12.4262	11.9622	11.9078	12.0346	11.3975	11.9503	11.1005	11.6301	11.9294	12.5729	11.3876	10.8255	11.354	10.9778	11.5309	10.5162	10.8529	11.1053	11.3337	10.9998	11.8527	11.6846	11.6903	11.1536	11.5385	11.3385	11.4627	12.37	11.8022	11.9065
ATL5 AT3G25520	AT3G25520	AT3G25520	10.664	10.9642	12.3015	10.0523	10.353	9.32939	11.073	10.9943	10.4448	11.8404	10.8446	11.6514	10.8701	11.0424	11.1966	11.731	11.0195	11.9331	12.0406	11.8749	11.9793	10.7762	11.4634	10.3081	11.2325	11.5734	12.2378	10.4717	10.0047	10.6182	10.0638	10.6136	10.0136	10.1812	10.2686	10.5051	10.6284	11.9945	11.6151	11.4688	10.5876	11.252	10.9491	11.4451	12.4921	11.8238	11.8543
psbC	ATCG00280	ATCG00280	11.6288	12.5313	11.718	9.5331	9.36154	10.1413	10.0099	9.72005	10.82	12.6188	12.2556	12.0113	10.5065	10.2376	10.0914	10.8852	11.0825	9.96407	11.9835	12.4856	11.97	9.74778	10.7696	9.62581	11.0367	9.8826	9.72876	12.0752	12.3783	12.0894	9.26435	9.63263	10.5733	12.37	11.812	11.9499	12.2467	11.2436	11.6158	10.5821	10.0098	10.0875	10.277	10.9048	8.94864	12.4098	11.254
AT1G29070	AT1G29070	AT1G29070	11.6205	11.9565	12.7985	9.51554	9.74503	8.8637	11.3227	10.2515	10.97	12.4472	11.7974	12.3288	10.8352	11.6708	11.5368	12.047	10.9153	11.9132	11.9963	11.5801	11.8852	11.0804	11.9303	10.7058	10.6797	9.95529	12.3646	10.4101	10.9234	10.0975	8.7557	9.14435	9.31346	10.8624	10.6116	10.1008	10.8392	11.831	11.6972	11.615	10.421	11.1965	10.8909	11.1243	11.5453	11.9806	11.9931
GSTU20	AT1G78370	AT1G78370	10.0779	10.95	9.73263	9.12877	9.52217	6.62627	10.3101	9.71029	8.33376	11.3458	12.7284	11.4574	10.9718	10.3188	9.36574	11.655	10.9229	11.413	11.2445	11.6512	11.7778	9.3594	10.2879	9.40639	11.3362	10.0462	11.8837	11.577	11.5082	9.83483	9.42277	11.1278	9.23153	11.8031	12.2031	10.9258	12.4576	9.95179	10.1248	10.7467	10.3176	10.8704	11.7027	9.44917	11.5567	11.3676	11.5795
AT3G11510	AT3G11510	AT3G11510	11.0258	11.2535	12.3539	11.0225	11.43	10.219	11.8036	11.7403	10.9969	12.1514	11.4118	11.9889	11.5783	11.6252	11.5046	12.3801	11.5403	12.2089	12.1387	12.1743	12.217	11.2132	11.8438	10.82	11.7205	11.7683	12.5632	11.2249	10.6823	11.1806	10.6438	11.1226	9.44938	10.8145	10.9703	11.1222	10.7344	11.7299	11.3393	11.5957	10.8161	11.2707	11.2151	11.2842	12.1283	11.7479	11.7628
RPL12-A	AT3G27830	AT3G27830	12.0129	12.2951	12.8653	9.96184	10.2847	9.68442	10.4789	10.0455	11.2535	12.6819	12.4063	12.6928	10.8435	11.3365	11.0116	11.4289	11.2421	11.0866	12.4949	12.2175	12.3012	10.7871	11.5441	10.6793	11.2555	10.0712	11.5015	11.577	11.7736	11.2148	9.7868	10.2277	9.05726	11.7575	11.6193	11.1422	11.6532	12.329	12.2565	11.6931	10.9328	11.2994	11.4137	11.4365	11.0137	12.5363	12.6144
AGP21	AT1G55330	AT1G55330	11.66	12.3168	13.0172	7.30551	7.88525	6.89429	7.8139	8.90442	11.076	12.9856	11.5939	11.7434	9.95379	11.1944	10.6051	11.2639	10.4037	9.68611	12.3925	12.2761	11.2559	9.18451	12.1758	8.76616	10.6279	9.91547	10.2535	6.12443	9.16982	5.07248	5.99897	4.44873	6.06298	8.14562	7.90427	6.68762	10.122	11.7115	11.8487	9.90237	8.3845	8.97144	8.74573	9.52606	8.91285	12.016	12.4557
c-NAD-MDH1	AT1G04410	AT1G04410	11.4907	11.4148	11.8434	12.7054	12.8411	12.3306	12.0396	11.4251	11.945	11.8696	11.9326	11.6582	12.5571	11.8545	11.6695	11.5013	11.9551	11.5562	11.8314	11.6002	11.7931	11.76	11.6816	11.8756	12.2369	11.5235	11.6171	11.7638	11.5104	11.8464	12.5396	13.0148	11.0691	11.4044	11.714	11.585	12.1229	12.0798	12.4993	12.5242	12.8043	12.4731	12.5593	12.2893	12.5075	11.7842	11.9523
AT3G54210	AT3G54210	AT3G54210	11.6892	12.0534	12.9011	9.65682	10.0833	9.37393	10.9038	9.99609	11.0184	12.5228	12.068	12.5152	10.623	11.2203	10.8534	11.2259	10.8697	11.1164	12.2732	11.8139	12.0509	10.5027	11.3448	10.522	10.7965	9.73753	11.5134	11.1251	11.4212	10.9106	9.34573	9.80395	9.38701	11.4281	11.2274	10.9826	11.4231	12.3787	12.3453	11.593	10.5653	11.2374	11.0663	11.245	11.4059	12.5791	12.6318
AT2G18690	AT2G18690	AT2G18690	8.46139	6.50205	6.487	10.5045	10.2934	12.114	9.62097	9.86796	9.87943	9.65101	8.89634	8.75436	11.161	8.76267	10.3683	7.54232	10.3049	8.6872	8.10666	7.08553	7.65711	10.1704	6.71891	10.9523	8.06397	13.3179	7.71617	3.59921	4.15236	3.79524	8.06654	6.88217	9.70082	2.46505	3.48308	3.42187	7.86345	7.51522	6.94951	8.60338	10.8058	10.1281	8.53256	9.03449	7.5114	3.91334	4.59835
AT4G34670	AT4G34670	AT4G34670	10.7398	10.8774	11.7096	10.5009	10.7778	10.1919	11.7177	11.9458	10.7111	11.1733	10.3568	11.0721	11.1224	10.9986	11.4762	12.0079	11.1213	12.2222	11.1624	11.2174	11.1326	11.1076	11.2076	10.6958	11.1594	11.7051	11.9653	10.5542	10.1063	10.7891	10.06	10.6839	9.90933	10.0966	10.3116	10.7575	10.4565	11.5912	11.2302	11.4938	10.836	11.5423	11.3745	11.3818	12.6745	11.3624	11.3777
TLL1	AT1G45201	AT1G45201	10.1943	10.3923	10.0456	6.40396	6.779	7.33368	8.12032	7.75476	8.55013	10.6669	11.523	11.3316	9.24717	8.03906	8.34679	9.85654	9.27907	9.06211	10.9484	11.6742	11.6114	9.28654	10.8896	8.58223	10.6854	9.76074	9.27786	12.7129	12.35	11.6635	6.48621	8.43414	6.06298	12.4868	12.4198	12.1253	12.003	11.0903	10.7862	10.5354	9.11848	9.81474	9.46281	9.56633	9.11812	11.9267	11.6344
SOT12	AT2G03760	AT2G03760	6.51621	6.3469	6.71426	8.48782	8.06905	9.13091	9.69648	11.0466	7.91663	8.27355	8.04198	8.19799	8.87928	7.31167	9.38219	9.37931	8.01485	10.5148	8.49661	8.10224	8.03805	7.89353	7.33111	8.40258	8.13168	13.2558	9.51105	5.28215	6.136	4.67597	7.00215	7.97011	9.78183	6.41614	6.07039	6.68762	7.44389	7.122	7.97282	7.44463	8.14633	7.59038	7.60652	7.77919	11.2444	6.21125	6.60785
PSRP6	AT5G17870	AT5G17870	12.1685	12.223	12.9004	9.81163	10.2671	9.56274	11.366	10.4227	11.3006	12.8536	12.4939	12.7234	11.3415	12.0059	11.4927	12.1372	11.5618	11.8562	12.4749	12.233	12.424	11.3167	12.2114	11.2296	11.5341	10.596	12.1351	11.8643	12.0068	11.3629	9.61886	10.1706	9.1634	11.8153	11.8266	11.4723	11.1575	11.7277	11.6184	11.5856	10.606	11.0541	11.2487	11.0572	11.153	12.0916	12.1921
P40	AT1G72370	AT1G72370	10.7878	11.0964	12.1956	9.95403	10.4281	9.41286	11.0004	11.2449	10.3344	12.0094	11.2252	11.8025	10.9413	11.1464	11.0291	11.9325	11.1285	12.0279	12.0352	11.9035	12.0496	10.6979	11.373	10.4114	11.3456	11.6027	12.2287	11.254	10.5829	11.3416	10.5927	11.0994	10.3463	10.6141	10.9124	11.2184	10.9954	12.1017	11.6367	11.4441	10.878	11.1585	11.1889	11.3923	12.4227	12.0593	11.9913
AT3G59540	AT3G59540	AT3G59540	11.0763	11.1764	12.3525	10.5449	11.0385	10.0482	11.6489	11.5604	10.6655	11.7407	10.9612	11.6378	11.4031	11.3713	11.334	12.0299	11.2348	12.2212	11.7419	11.7318	11.7963	10.7689	11.4781	10.5599	11.4371	11.6856	12.3493	10.8611	10.1799	11.0319	10.4365	11.5444	10.5343	10.2305	10.4499	10.7914	10.5003	11.6661	11.2735	11.5639	10.8698	11.1366	11.1719	11.1872	12.4128	11.6359	11.8077
AT4G18100	AT4G18100	AT4G18100	10.8993	11.0903	12.4671	10.1849	10.5108	9.69499	11.4357	11.4936	10.378	11.9052	10.9519	11.8224	11.0589	11.2162	11.0134	11.9452	11.018	12.1626	11.9915	11.9273	12.066	10.6205	11.4329	10.3245	11.2545	11.9323	12.3372	10.9737	10.2325	11.1143	10.4905	10.9735	10.6045	10.4186	10.6514	11.0854	10.3849	11.655	11.3299	11.1656	10.4377	10.7233	10.7646	10.9312	12.3174	11.6222	11.6532
FBA5	AT4G26530	AT4G26530	12.0244	11.7843	9.03146	6.57649	6.17047	7.53536	9.70154	7.95828	9.76768	12.0437	13.0143	10.4962	8.59517	10.5954	9.42517	10.6366	9.3002	10.5307	10.6674	11.1069	10.559	10.2013	10.8905	10.0743	9.75344	8.90467	10.2622	12.3464	12.6804	11.1289	5.45843	6.57242	6.14064	12.1071	12.4628	10.3897	12.2015	11.3857	11.4357	10.6345	9.66196	9.96949	10.277	10.6325	10.3338	11.8241	12.3096
ARF1 AT1G23490	AT1G23490	AT1G23490	11.6445	11.7919	11.755	11.4809	11.5986	11.6809	11.3504	11.1835	11.9164	13.1067	13.0257	12.6588	11.8877	11.8095	11.7657	11.7752	12.4604	11.6587	12.635	12.8131	12.3796	11.6421	12.2623	11.7301	12.356	11.627	11.7996	11.0755	11.2301	10.6157	10.817	11.0231	10.645	10.9225	11.1015	11.0116	11.601	11.7659	11.7793	11.8272	11.6688	11.6254	11.7663	11.831	11.1185	11.588	11.7805
AT3G60245	AT3G60245	AT3G60245	10.7468	10.9141	12.5707	9.69164	10.1852	9.15152	10.5402	10.7996	10.1706	12.1278	11.0539	12.0504	10.7747	10.9354	10.6601	11.8383	10.8242	11.8823	12.1189	11.9239	12.1808	10.1368	11.1472	9.83692	11.124	11.5687	12.2574	10.9191	10.3514	10.8302	10.2863	10.8764	10.7556	10.4883	10.7144	10.851	10.679	11.9847	11.6853	10.9241	10.3498	10.6662	10.3747	11.0349	12.0479	11.9811	12.0337
PGY1	AT2G27530	AT2G27530	10.6873	11.0029	12.2444	10.2091	10.5586	9.66305	11.3759	11.298	10.3364	11.9689	11.0388	11.7079	11.011	11.2302	11.1668	11.99	10.9506	12.0522	11.9606	11.8245	11.926	10.8308	11.4189	10.4581	11.2445	11.5824	12.1445	10.844	10.1927	10.5958	10.2428	10.683	10.5872	10.2167	10.4734	10.8405	10.9756	12.0207	11.6797	11.5016	10.7792	11.1535	11.0256	11.307	12.3899	11.9513	11.9855
PSRP4	AT2G38140	AT2G38140	11.9108	12.1076	13.2111	9.66958	10.1058	9.33841	10.834	10.1965	11.2386	12.7259	12.1577	12.7438	10.7812	11.4334	11.1095	11.5213	10.98	11.358	12.4272	12.0121	12.2531	10.732	11.5613	10.5832	10.9069	9.88562	11.804	11.0944	11.4347	10.8058	9.43472	9.68394	8.27163	11.503	11.2214	10.9517	10.782	11.6764	11.6371	11.1642	9.91203	10.5333	10.3407	10.6382	10.7575	11.9294	11.9235
rpl2 ATCG01310	ATCG01310	ATCG01310	12.2139	12.4648	12.5709	10.0908	10.438	10.4898	10.4892	10.788	11.5357	12.4683	12.1904	12.253	10.7628	11.1315	11.1888	11.505	11.1883	11.27	12.0259	11.9212	12.0271	10.5172	11.5586	10.2092	11.0829	10.7336	11.5093	11.1972	11.7644	11.2902	9.97863	10.8159	10.6113	11.7454	11.326	11.5135	11.9577	12.7925	12.4665	11.9696	11.5857	11.7466	11.742	12.2461	11.5795	12.2241	12.2374
AT1G07930	AT1G07930	AT1G07930	10.883	11.1495	11.6325	10.1782	10.2627	10.0915	11.1589	11.26	10.7158	11.4287	11.0908	11.3832	10.8331	10.988	11.1453	11.9965	11.4167	12.1431	11.6377	11.7702	11.6718	10.847	11.4024	10.6222	11.4446	12.1186	12.3036	11.2535	10.7668	11.3391	10.9458	11.4106	11.3286	10.9963	11.0701	11.3028	10.6632	11.5963	11.1777	11.0496	11.0396	10.9931	11.4054	11.5047	12.4543	11.5741	11.508
CP1 AT5G49480	AT5G49480	AT5G49480	12.2313	11.5565	11.2968	11.48	11.4071	11.2433	10.8102	9.76084	10.528	12.2727	13.236	11.0263	10.9661	9.45447	9.84274	10.1413	10.1762	10.8297	12.3199	12.929	11.5955	9.93278	11.3736	10.5249	10.6035	11.5325	10.6545	10.8293	10.4577	9.39327	9.33621	11.0597	8.61555	10.5496	10.734	8.76403	10.4785	10.0501	10.0048	8.75016	9.61525	8.43332	9.9865	10.3061	10.768	10.0006	10.7883
DIP2	AT5G03210	AT5G03210	9.63198	7.14431	4.60906	10.2564	10.9503	11.2384	8.84516	9.87235	9.3409	8.09959	10.7368	7.0873	10.8527	6.81082	7.74545	5.85032	7.66991	8.26101	8.44474	9.75675	7.96317	8.41242	7.38015	9.10263	8.95843	10.376	6.90334	11.9366	10.4328	12.6038	11.1769	11.4723	9.79989	10.0682	10.1749	13.3583	6.916	4.69052	5.70488	4.89984	8.07908	5.23922	7.05506	7.56268	6.00026	2.63539	4.43934
AT1G52300	AT1G52300	AT1G52300	11.1816	11.2939	12.5455	10.3144	10.7856	9.71244	11.1352	11.3134	10.7158	12.3386	11.469	12.2925	11.2479	11.4326	11.3771	11.9803	11.0195	12.1219	12.155	12.0312	12.2947	10.9968	11.7029	10.6844	11.3344	11.8564	12.3196	11.2773	10.8364	11.3897	10.59	10.9294	10.5785	10.8482	11.0749	11.2757	10.7186	11.8159	11.5138	11.1955	10.4805	10.9978	10.6126	10.9911	12.0549	11.9055	11.9514
AT3G44010	AT3G44010	AT3G44010	11.5047	11.4032	12.5504	11.3971	11.8534	11.1206	12.0391	12.1108	11.3241	12.0712	11.5015	11.9357	11.8419	11.6817	11.6009	12.2776	11.6713	12.3331	11.996	12.0126	11.9865	11.2328	11.8222	11.088	11.9553	12.0258	12.4843	11.4501	10.8982	11.3275	11.0831	11.5021	10.854	10.8157	11.2227	11.2942	10.6864	11.4952	11.2702	11.5077	10.9539	11.0927	11.3601	11.1743	12.1339	11.5003	11.7903
rpl2 ATCG00830	ATCG00830	ATCG00830	12.1158	12.3829	12.5061	9.9977	10.3446	10.4086	10.4009	10.6933	11.4594	12.402	12.117	12.1847	10.6854	11.0462	11.0946	11.42	11.11	11.1841	11.945	11.8407	11.9632	10.4184	11.4713	10.135	10.9993	10.6449	11.4255	11.105	11.6805	11.2028	9.89458	10.7174	10.5307	11.6662	11.2373	11.4215	11.9357	12.7695	12.4459	11.9517	11.5576	11.7199	11.717	12.2236	11.5529	12.2064	12.2119
MAT3	AT2G36880	AT2G36880	11.5922	12.1186	12.4575	9.83164	9.81933	9.89159	9.76339	10.1211	11.3522	12.1595	11.8966	11.7773	10.4052	10.3986	10.6813	11.1694	11.4705	10.8409	12.3808	12.4406	12.1953	10.523	11.8822	10.4129	11.8562	11.1005	11.6865	11.8245	11.5594	10.8159	9.59509	10.1456	8.23669	11.4616	11.6704	11.5073	11.7952	12.2779	12.3141	11.0075	10.642	10.7165	10.7493	11.6109	10.5699	12.0548	12.2658
GRP3S	AT2G05380	AT2G05380	11.752	9.97872	9.85846	11.3543	11.3549	10.5838	11.9451	11.9817	11.315	6.75809	8.44424	7.67378	12.826	11.7584	13.0989	11.0801	10.0858	11.0978	7.93149	7.37423	8.65119	11.424	10.6316	10.8921	10.0962	10.6597	10.4271	10.5581	8.6291	12.4654	10.4948	12.3875	9.44938	8.57774	9.83027	10.4765	10.3095	10.5091	11.5114	11.5714	12.5507	11.1904	11.211	11.2192	11.8519	6.01124	4.1622
LEA3	AT1G02820	AT1G02820	11.8726	11.6927	10.2309	10.6142	10.5495	9.45493	9.59535	8.00697	9.64977	9.69809	11.0532	8.09426	8.52993	6.97699	4.98835	6.85548	8.20612	7.6535	9.90238	10.8718	9.32492	6.00641	6.71891	7.03771	8.70977	7.82946	7.27411	13.1045	11.3747	12.1732	8.63657	9.33793	6.3513	11.2535	12.3678	11.9817	11.1908	9.49718	10.5995	7.15588	8.19945	5.74588	8.89837	10.029	8.76706	8.67356	10.2645
FER1	AT5G01600	AT5G01600	8.94019	7.72746	9.67077	9.39008	10.9365	11.6258	9.60349	11.1514	11.0712	10.6712	10.3357	11.2899	11.4953	9.66396	10.9659	9.77774	10.5103	10.731	11.7561	10.2155	11.6308	10.9222	9.90612	10.8721	10.3285	11.076	10.5691	12.2552	9.23314	11.6405	13.6105	13.1086	12.7515	12.3506	11.3646	10.1303	10.6164	11.0744	12.2572	9.43462	9.46686	10.6988	9.31706	10.496	10.0311	10.0892	9.74984
XTH6	AT5G65730	AT5G65730	12.6643	12.5765	11.8358	6.86978	7.67456	7.53536	7.76151	8.06943	10.5385	10.0805	11.0094	10.1777	8.52479	9.47407	9.35745	9.47337	8.88122	8.62682	11.051	11.0412	10.3466	7.26657	9.60975	7.31193	9.87942	8.05717	9.18877	8.29158	9.46534	3.59527	4.07445	4.38173	6.97744	8.50711	8.8987	4.78191	12.5301	11.9981	12.223	10.8824	9.36259	10.1669	9.7365	10.6992	9.98462	12.3006	12.5386
AT1G09690	AT1G09690	AT1G09690	10.3774	10.6222	11.8876	10.4757	10.748	9.88852	11.9276	11.6828	10.7002	11.5345	10.7161	11.5039	11.3194	11.6377	11.679	12.0187	11.225	12.2497	11.4924	11.4812	11.64	11.3697	11.8783	11.1062	11.4558	11.5174	12.3926	10.798	10.5089	10.8472	10.4833	10.9777	10.3194	10.5155	10.4944	10.7742	10.138	11.2871	11.1154	11.44	10.893	11.4298	11.3069	11.0093	12.2252	11.4066	11.3118
GSTF7	AT1G02920	AT1G02920	8.85528	6.9558	9.00018	12.3197	12.8533	12.7484	10.6955	10.975	11.3006	9.32816	7.84333	7.78225	12.4745	9.55252	10.975	7.25337	10.7339	7.45108	8.23797	6.03586	8.27137	10.4761	6.62436	10.6588	9.62424	12.4521	7.32681	3.78062	2.719	5.444	9.2677	9.91177	12.8749	3.33426	2.78088	3.72643	8.22584	7.69815	7.76494	10.3438	12.7238	11.5927	9.64118	11.5089	9.41145	4.33855	4.9328
FAMT	AT3G44860	AT3G44860	9.09199	8.59381	5.06979	9.11016	9.11345	10.4299	8.61224	7.07562	8.0203	12.427	13.6118	11.6172	11.3298	8.09074	9.33509	10.1609	11.9778	10.8059	11.2302	11.1139	10.9365	11.4394	10.6367	10.2492	11.9482	11.4183	9.71983	9.99279	10.0227	9.50987	7.60942	8.86966	9.0063	9.81279	9.42264	10.0038	10.2244	6.57972	7.42424	7.66484	10.2427	8.33616	8.33927	9.07971	7.40339	5.69926	6.53106
VSP1	AT5G24780	AT5G24780	4.47035	4.41465	3.92811	4.33171	4.39278	4.17931	3.40121	6.31112	2.5361	10.7383	10.9519	11.4754	7.6903	7.59342	4.80527	6.94432	6.27312	6.95765	12.3637	12.5085	12.7753	10.0006	10.8466	7.80759	9.993	8.89071	10.9305	7.09965	7.40417	5.53067	4.82105	4.38173	5.29003	9.96988	5.23858	6.63983	6.24626	3.89829	4.14122	6.34981	3.09664	5.05033	2.94207	2.76189	2.83966	6.38687	5.15379
AT2G27710	AT2G27710	AT2G27710	10.4146	10.7193	12.1347	10.3973	10.7917	9.86998	11.3644	11.3563	10.5403	12.0287	11.2767	11.975	11.3134	11.2162	11.2632	12.0071	11.3417	12.096	12.1576	12.0091	12.1308	10.8585	11.7466	10.5846	11.6886	11.826	12.4298	10.8261	10.3665	10.7572	10.3943	11.391	10.6909	10.4936	10.6333	10.7414	10.0053	11.14	10.7388	10.8253	10.3397	10.5702	10.5914	10.6791	11.7058	11.2202	11.2599
NUC-L1	AT1G48920	AT1G48920	9.14766	9.42598	10.1451	8.46604	8.77682	8.69142	10.9196	11.1577	8.94735	10.7321	9.92684	10.1237	10.1946	10.4015	10.2715	11.7782	10.6458	12.1003	11.3294	11.73	11.4336	10.3206	10.8379	10.0955	11.0334	12.0552	11.9114	10.6557	9.30955	10.7193	10.4962	10.4069	11.5233	9.6351	10.0218	10.4984	9.74167	10.4608	9.66157	9.82109	9.66061	9.89218	10.1423	10.3712	12.3543	10.2578	10.4636
AT4G29020	AT4G29020	AT4G29020	7.12337	8.23305	12.5695	3.48176	2.55818	4.00905	5.11421	10.4137	10.0161	11.423	5.85874	12.3602	5.95115	4.61809	7.00946	9.30576	9.84983	9.012	9.51252	6.18537	10.7374	5.06209	8.76478	5.10433	6.56705	5.40026	11.6314	3.49917	8.86859	3.08615	5.31059	3.31409	4.08244	8.20633	5.83657	7.54725	6.82053	10.9689	9.82497	5.66335	3.87052	5.47227	6.15116	9.21591	5.08771	12.5488	11.3395
AT3G09500	AT3G09500	AT3G09500	11.3463	11.5342	12.5524	10.9367	11.2581	10.0727	11.9445	12.0803	11.0688	12.2212	11.4096	12.0525	11.5533	11.9709	11.7329	12.3011	11.3956	12.3521	11.9994	11.8322	12.056	11.521	12.0393	11.2588	11.5746	11.5322	12.415	11.2744	10.8943	11.4461	10.4905	10.7435	9.57008	10.7668	10.9289	11.2481	10.4597	11.5445	11.2999	11.4786	10.5595	11.1006	10.9389	10.8974	11.7261	11.5452	11.6763
AT3G22230	AT3G22230	AT3G22230	10.397	10.4848	11.7478	10.9194	11.3084	10.0371	12.1271	11.9888	10.4651	11.3738	10.6174	11.0892	11.3762	11.6327	11.3134	11.838	10.988	12.2419	11.3528	11.3444	11.3235	11.2222	11.574	11.0112	11.2316	11.9289	12.1922	10.3841	9.90321	10.3597	10.4876	10.9088	10.2749	9.85251	10.1892	10.2868	9.98234	11.0158	10.7293	11.2433	10.6255	10.9566	10.8174	10.6625	12.3184	10.8891	11.1844
psbI	ATCG00080	ATCG00080	12.1804	12.1585	11.6287	10.1049	9.79806	9.86375	9.58717	9.45936	11.6419	12.4559	12.7841	11.9351	10.6668	10.6382	10.7109	10.9707	11.349	10.4543	12.2465	12.366	11.9077	10.2387	11.3149	10.1387	11.5964	10.6449	10.289	12.1369	12.2224	11.4878	8.90063	9.96853	9.20014	12.287	11.7384	11.8445	11.0252	11.5864	11.131	10.1784	10.0392	9.88715	10.4336	10.9693	9.73748	9.44766	10.8139
ABCF1	AT5G60790	AT5G60790	9.73063	9.70689	10.2624	10.2157	10.2403	10.4256	10.8323	11.4764	10.099	9.96102	10.6932	9.49486	9.97091	9.3763	9.71652	10.6379	10.488	11.3699	10.2873	10.6271	9.94114	9.68474	10.0495	9.62051	10.4429	12.9662	11.1607	9.39798	8.98353	9.95462	10.3973	10.7468	11.0491	9.22248	9.17808	10.141	9.10711	9.72754	9.58221	9.2648	9.72543	9.46064	9.53625	10.4848	12.0042	9.47932	9.08
MT1C	AT1G07610	AT1G07610	7.70593	7.37264	5.64124	13.7878	14.385	12.9958	7.20651	6.63402	5.25564	7.68943	9.22481	5.16547	10.579	8.9179	6.60461	6.63832	5.15285	6.81772	7.86803	8.96093	6.95007	7.4717	8.77215	9.22634	6.84433	6.05791	6.051	8.32849	6.67522	6.92715	8.41917	6.97601	8.73928	6.78793	8.0045	6.53922	8.71161	6.05649	7.12569	9.18338	9.26984	8.44981	6.58689	6.14543	7.58839	4.11108	7.77398
ATCG00670	ATCG00670	ATCG00670	11.7996	12.3835	12.478	10.5134	10.2912	10.623	10.4378	10.5892	11.1419	12.4059	12.3204	12.2197	10.9794	10.5761	10.5945	11.0257	11.1902	10.5895	12.2856	12.1065	11.7928	10.6682	10.7285	10.2215	11.1073	10.7156	10.416	12.1421	12.3279	12.1118	10.0696	10.8802	11.3755	12.2766	11.7773	11.9165	9.95899	10.1724	10.4781	9.9628	9.93459	9.79981	10.5474	9.7407	8.14198	10.4997	10.1884
AT3G57450	AT3G57450	AT3G57450	11.8865	10.9676	10.4923	9.71645	10.0191	9.11	9.62498	9.9324	9.30028	13.0877	12.9687	12.3706	11.3386	10.5354	10.506	11.4654	11.0024	11.6803	11.8125	11.8785	11.2977	9.99022	10.0235	9.95103	10.1203	11.6905	10.9769	10.5495	11.5399	7.93537	9.36772	9.27931	9.60132	10.3813	10.3573	7.67722	9.55852	10.1196	9.21228	7.99636	8.13468	7.8649	8.88942	9.13966	9.49907	9.31524	9.69809
ASPG1	AT3G18490	AT3G18490	12.5667	12.2713	11.4556	10.6819	10.8446	11.1465	11.6245	11.2767	12.0522	10.5423	10.8872	10.9168	10.9218	11.0758	10.6567	11.015	11.4092	10.945	12.0249	12.3038	11.6968	11.0892	11.4212	11.1637	11.8929	10.8911	10.9739	12.4768	12.4092	12.0873	12.3356	11.1668	7.17494	12.5707	12.5847	11.4655	11.8388	11.2209	11.4365	11.136	11.2367	11.0997	11.4747	11.3364	10.7836	10.8243	11.103
MYBR1	AT5G67300	AT5G67300	10.781	10.7014	9.01732	10.9898	11.0057	10.9778	9.91932	9.70045	9.65944	12.8719	13.4391	11.6502	12.1573	10.2651	9.77167	11.8079	11.76	11.358	11.4935	11.853	10.837	10.6552	10.7951	10.717	10.8935	11.8868	10.5636	9.80913	10.4935	9.45737	10.5779	9.46676	10.24	9.91523	9.67796	9.79195	10.4203	9.65259	9.6687	9.03328	9.84098	9.13839	9.0505	9.35881	10.1088	9.31524	9.13618
AT5G47700	AT5G47700	AT5G47700	10.601	10.736	12.3482	10.4703	11.1118	9.57423	11.3795	11.7088	10.5628	11.9689	10.8254	11.8305	11.0491	11.2037	11.0905	11.8834	10.9822	12.1474	11.7038	11.6035	11.7871	10.5041	11.3331	10.3646	11.1441	11.4762	12.3859	10.5964	10.0191	10.3438	10.3317	10.8757	10.1037	10.0383	10.3502	10.6755	9.72066	11.1189	10.7789	10.9489	9.8576	10.4394	10.3325	10.6005	11.9455	11.1941	11.2659
P5CS1	AT2G39800	AT2G39800	8.82408	7.75857	6.80919	9.93037	9.89286	7.27853	10.1009	8.46172	8.19884	6.62268	7.93986	6.49062	8.57541	8.49318	8.12363	8.97139	7.74718	9.99689	7.48255	7.18122	7.82572	7.7823	7.92074	7.43772	8.3176	8.45147	9.54785	11.2787	11.4356	12.6688	11.9594	11.821	10.2156	11.672	11.5971	13.0479	9.85803	9.20169	10.1494	9.60128	9.7612	9.28495	9.70881	9.2835	10.5304	7.2154	7.47922
AT4G15000	AT4G15000	AT4G15000	10.7551	11.1033	12.32	10.6208	10.9654	10.0646	11.4104	11.4851	10.6623	11.9553	11.0329	11.89	11.3568	11.497	11.2662	12.23	11.3507	12.1929	11.9859	11.9337	12.0217	11.0667	11.7643	10.8303	11.5719	11.9243	12.3426	10.9395	10.5335	10.6866	10.6073	11.1946	10.6957	10.511	10.7653	10.8809	10.3322	11.525	11.1438	11.2531	10.613	10.9082	10.8893	10.8953	11.7324	11.5189	11.5854
AT1G77940	AT1G77940	AT1G77940	10.5653	10.8038	12.0592	10.0717	10.4536	9.19685	11.3929	11.3477	10.4448	11.6052	10.6348	11.5412	10.9585	11.1826	11.0291	11.9129	10.9988	12.1031	11.726	11.5706	11.6659	10.4761	11.272	10.268	11.1624	11.6658	12.3497	10.335	9.91097	10.1903	9.89025	10.5549	9.46833	9.93442	10.0708	10.2683	10.12	11.2428	10.864	10.7407	10.013	10.4381	10.4173	10.7882	11.9618	11.1591	11.2154
TUB4	AT5G44340	AT5G44340	11.4037	11.5877	11.8586	10.9615	10.3757	10.8418	11.7033	11.6703	11.5488	11.5665	11.1666	11.5881	11.0704	11.1438	11.4189	12.1007	11.7852	12.0072	11.4247	11.089	11.4963	11.1324	11.7949	10.8899	11.6047	11.2591	11.9206	9.70352	10.3628	8.87466	8.66729	9.49279	9.10647	9.61844	9.78753	9.32297	10.9277	11.6693	11.5969	11.009	11.0297	11.0883	11.4751	11.7922	11.7809	11.3668	11.4897
AT5G35530	AT5G35530	AT5G35530	10.2065	10.1989	10.9342	9.88185	10.1616	9.56274	11.3141	11.2508	9.99083	10.6755	10.2123	10.6101	10.6854	10.675	10.9169	11.7007	10.6586	11.924	10.7984	10.8495	10.8456	10.4491	11.0129	10.3031	10.7541	11.398	11.8957	10.3584	9.91741	10.4689	10.1333	10.5338	10.5768	9.94114	10.0985	10.3513	10.1674	11.0259	10.621	11.072	10.444	10.8932	10.9998	10.7699	12.506	11.1432	11.0097
NHL3	AT5G06320	AT5G06320	12.2858	11.8674	10.6754	12.5175	12.4665	12.1888	10.4164	10.7681	10.9995	11.9129	12.1917	11.9901	12.5517	11.3854	11.2677	11.0703	11.2625	11.0457	11.4957	11.3606	11.4188	11.9617	9.43741	12.7732	10.4775	13.0072	10.3153	10.7967	11.4854	8.5885	10.3773	10.2526	12.0671	10.7246	10.7151	9.52228	11.7035	11.5912	10.896	10.5685	12.2811	11.2718	11.0836	11.2717	10.4739	10.5034	10.9883
RPS15	AT1G04270	AT1G04270	11.1775	11.3764	12.3446	10.5875	11.1483	10.1719	11.5594	11.6909	10.8114	12.0296	11.2233	11.9074	11.2603	11.3396	11.2258	11.8155	11.1455	12.039	11.9259	11.9445	12.0776	10.9079	11.4112	10.5832	11.4525	11.7629	12.2201	11.35	10.8082	11.3011	10.6425	11.1392	10.7725	10.7686	11.0696	11.2922	10.955	11.9228	11.5999	11.4574	10.9311	11.1577	11.1529	11.215	12.1961	11.8013	11.9592
ATRBP45C	AT4G27000	AT4G27000	10.1426	10.0653	10.3742	11.3444	11.222	11.149	12.1278	12.0247	10.8258	9.87238	9.91739	9.85368	11.0949	11.1155	11.0507	11.97	11.0661	12.1377	9.66965	9.61105	9.82156	11.0387	11.2952	11.1764	11.1426	11.3019	11.6854	9.90388	9.96668	10.0482	10.7166	10.9324	10.4904	9.77696	9.9035	10.0295	9.99442	10.2835	10.072	11.0545	11.07	11.0145	11.3368	10.9527	11.89	10.0526	10.0265
ERF4	AT3G15210	AT3G15210	12.4893	11.725	9.9902	8.79784	9.31093	9.67021	9.62631	10.1248	9.55628	12.256	13.1609	12.072	10.7463	10.3403	9.82479	9.67634	9.92128	10.2903	11.8011	12.2332	11.2628	9.65083	10.4846	9.27434	10.142	11.9813	10.0298	11.4446	12.0405	10.6945	8.69239	8.99544	9.15874	10.9348	10.6096	10.8634	10.4493	10.4488	9.44274	8.18262	8.43283	7.93294	9.45828	9.04972	9.25741	10.181	10.1664
rps7-A ATCG00900	ATCG00900	ATCG00900	12.8545	12.956	12.372	10.8213	11.0553	11.2117	11.3103	11.3158	12.1657	12.6307	12.3512	12.8005	11.3459	11.3957	11.2969	12.1137	11.8634	11.5749	12.1101	12.1812	12.0828	10.7653	11.9454	10.6958	11.3725	11.1711	11.2849	11.7235	12.1264	11.9868	9.82817	10.911	10.1769	11.8878	11.6991	12.1177	11.0992	11.4339	11.1832	10.4387	10.4298	10.4593	10.5601	10.9369	9.72676	11.2796	11.3542
rps7-A ATCG01240	ATCG01240	ATCG01240	12.8542	12.9566	12.372	10.8199	11.0553	11.2129	11.3107	11.3158	12.1657	12.631	12.3506	12.8005	11.3459	11.3957	11.2976	12.1137	11.8626	11.5749	12.1091	12.181	12.083	10.7641	11.9459	10.6945	11.3725	11.1706	11.2849	11.7238	12.1275	11.9871	9.82817	10.9103	10.1769	11.8883	11.6991	12.1177	11.0987	11.4339	11.1837	10.4394	10.4306	10.4606	10.5601	10.9369	9.72676	11.2796	11.3542
AT1G64370	AT1G64370	AT1G64370	10.9794	10.7321	8.19337	10.0228	10.5837	11.2492	10.1274	9.3282	10.0286	10.6904	11.7116	10.0093	10.3246	9.78544	8.57859	10.1572	10.7881	9.47078	10.551	11.3252	10.3707	9.75516	9.47401	9.91687	10.9362	10.381	8.47504	12.2633	11.9962	12.6394	11.5126	12.2916	11.8181	11.9708	12.3255	12.5674	11.1154	9.26787	8.94728	9.38124	11.176	9.78473	11.0398	9.64867	9.89573	9.94872	10.6224
SLD1	AT3G61580	AT3G61580	10.6298	10.6944	10.2696	9.80007	9.86097	9.40859	11.5468	10.7227	10.4797	11.4987	11.6478	10.9585	10.6911	10.7889	10.4959	11.9013	11.2293	11.9059	11.1524	11.3147	10.7662	10.3918	10.8726	10.2092	11.3081	10.7386	12.182	10.1801	10.0429	10.1429	9.80534	9.78787	9.48331	10.0996	10.0058	10.1916	10.2685	10.5227	10.4675	10.0813	9.7447	9.88715	10.7889	11.0948	11.57	10.2964	10.269
AT1G57660	AT1G57660	AT1G57660	10.4761	10.6934	11.9765	9.94881	10.2999	9.3066	10.7978	11.0093	10.1974	11.559	10.6144	11.3311	10.6492	10.8209	10.7335	11.4925	10.552	11.7693	11.5939	11.5138	11.6027	10.3647	11.0967	10.084	10.8172	11.8071	11.8283	10.4256	9.96295	10.2992	9.86397	10.57	9.54173	10.0703	10.2225	10.3147	10.3605	11.655	11.3344	11.082	10.2758	10.7137	10.6508	10.8028	12.3706	11.6113	11.6407
AT1G21500	AT1G21500	AT1G21500	11.5427	11.9213	12.1236	7.60027	7.73978	7.48752	9.4328	8.52438	10.6348	12.6305	12.4804	12.2577	10.0302	11.1654	10.5443	10.5593	10.3165	10.1795	12.2804	11.9111	12.2025	10.0027	11.1011	9.78341	10.5302	9.02455	10.5338	10.4024	11.5952	9.58436	6.12234	6.49528	5.65012	11.1198	10.9898	10.1129	11.3747	11.8555	11.5931	10.9703	9.88797	10.399	9.66233	10.6785	9.86022	11.8834	12.3074
RPS6 AT4G31700	AT4G31700	AT4G31700	10.2065	10.6608	12.064	9.8791	10.0682	9.53555	11.0891	10.9555	10.4503	11.6164	10.4646	11.5642	10.724	10.7307	10.6724	11.7749	10.8554	11.8334	11.8155	11.7048	11.8311	10.1977	11.0168	9.71796	11.178	11.4218	12.0721	10.1023	9.40796	9.76206	9.99487	10.5998	10.1012	9.69194	9.91213	9.80284	10.0512	11.6413	11.2589	10.9246	10.2291	10.6686	10.7306	11.0656	12.0046	11.5807	11.5236
AT2G41410	AT2G41410	AT2G41410	11.7527	11.541	10.4613	13.0173	13.2812	13.4467	12.6392	12.6017	12.6002	10.815	10.6867	10.0497	12.5677	11.5113	10.8874	10.987	11.8399	11.2973	10.8971	10.9934	10.5218	11.8187	11.1026	12.1138	11.9048	12.5884	10.9974	11.7878	11.4071	11.9967	12.0569	12.0121	11.7593	11.6244	11.4924	11.6007	10.809	10.8596	10.6188	11.48	11.9673	11.2741	11.9589	11.6579	11.5565	9.70779	9.77919
ATBETAFRUCT4	AT1G12240	AT1G12240	9.97275	10.1051	9.66535	10.2816	10.1568	10.6249	9.79335	9.74897	9.12995	12.1924	13.0088	11.9429	9.72182	9.49614	9.08672	9.86225	10.3484	9.78668	12.3011	12.5486	11.652	11.0902	11.5295	10.399	11.4876	11.0892	10.3938	9.97544	10.198	9.8405	9.47868	9.11628	8.75789	10.5223	9.85061	9.17155	9.71934	10.0089	9.96826	9.61456	9.02698	9.5551	8.41287	8.18305	8.46143	9.70269	9.57439
HSP81-3	AT5G56010	AT5G56010	12.5454	12.792	13.2516	11.3513	11.3828	11.4108	10.9839	11.1613	12.202	11.0963	11.1172	10.7458	11.3988	11.3608	11.3255	11.2157	11.6839	11.079	11.9392	12.4081	12.0752	11.6762	11.7794	11.2571	11.7501	11.583	11.6324	12.2688	11.2176	11.8829	11.7702	11.8749	10.1723	11.2203	11.6461	11.7826	11.7886	11.8643	11.7839	11.4808	11.4731	11.5487	11.421	12.1472	11.438	11.1137	11.2405
ATARCA	AT1G18080	AT1G18080	10.4508	10.8515	11.7678	10.1282	10.1058	9.47142	11.1556	11.1342	10.3464	11.5979	10.8186	11.6079	10.6819	10.9253	10.7474	11.6411	10.8387	11.9373	11.6196	11.5296	11.7002	10.5501	11.1932	10.268	11.0765	11.5786	11.9313	10.9784	10.456	10.9796	10.6283	11.0217	11.0616	10.5133	10.7126	11.0274	10.6438	11.7317	11.5098	11.0462	10.6912	10.9284	11.1548	11.1993	12.3641	11.7951	11.6973
NIT2	AT3G44300	AT3G44300	5.21067	4.98751	4.41573	13.5949	13.8355	12.4038	11.2738	12.3111	8.6244	4.21296	4.31407	4.75654	11.0975	9.07279	8.58808	4.82131	4.01998	6.26658	4.55523	4.99728	4.69466	9.50664	4.94143	10.755	6.2542	11.5941	6.57135	4.27994	3.84163	6.61966	12.8294	11.603	12.4248	3.79592	4.25413	4.37804	5.93594	5.4356	6.68269	8.4037	10.3038	10.1594	5.40345	5.42491	9.39575	5.21729	5.76976
AT5G65220	AT5G65220	AT5G65220	12.1419	12.1103	12.9329	10.6596	11.0629	10.11	11.4376	10.9912	11.3601	12.7109	12.1533	12.6287	11.2672	12.1429	11.6928	11.865	11.0926	11.7695	12.1855	11.9728	12.1096	11.6872	12.345	11.6453	10.9243	10.1867	11.8757	11.3571	11.6519	11.3727	10.0999	10.5663	10.6249	11.5	11.4095	11.3285	11.1314	11.9627	11.8509	11.8117	10.7885	11.4214	11.0499	10.8274	11.2447	12.1639	12.2149
EMB3010	AT5G10360	AT5G10360	10.9117	11.1266	12.1073	10.3565	10.507	9.72624	11.1997	11.331	10.6397	11.6918	10.9703	11.5257	11.0695	11.049	11.3291	11.8328	10.9865	11.8913	11.817	11.8274	11.7787	10.8191	11.4393	10.5488	11.1795	11.537	12.0363	10.9336	10.3834	11.1632	10.2291	10.7097	10.2178	10.4921	10.6411	10.9963	10.8282	11.8643	11.6829	11.3602	10.749	11.3238	11.1407	11.287	12.1689	11.7191	11.6662
ACD6	AT4G14400	AT4G14400	12.4806	12.4703	11.4764	9.28205	9.43428	10.0509	11.3447	10.2665	12.0461	9.96976	10.2148	9.94985	11.2179	10.9171	11.0796	10.1839	11.4258	10.3595	9.12359	8.44242	9.79259	10.9035	9.1848	10.5432	10.9284	10.0318	8.72755	8.28032	8.89232	6.94829	7.23869	8.28628	5.70228	8.45489	8.57925	6.7787	12.5706	11.2762	11.2403	10.5848	11.8615	11.235	11.7809	12.3607	11.1761	8.47248	9.76249
CP12-2	AT3G62410	AT3G62410	12.7786	12.3295	11.3217	10.2287	10.589	10.6396	11.4119	9.94077	11.3261	11.7175	12.2531	11.1774	11.0598	11.2612	9.83678	10.3113	10.7714	10.2926	10.7552	10.8762	10.7733	10.5273	9.76922	10.9701	10.7741	9.58863	9.45941	12.4854	12.3486	12.1709	10.5019	9.5906	8.05808	12.2195	12.4845	11.4859	11.988	11.2821	12.0205	10.9547	11.0355	10.5989	11.1747	10.7361	10.6147	11.3453	11.9742
AGP12	AT3G13520	AT3G13520	13.0878	13.1376	13.1338	10.0717	10.1852	10.3272	9.99553	9.77497	11.7739	12.1702	11.1825	10.8485	11.1121	11.8709	11.4608	12.0565	11.1577	10.4947	11.8686	11.9116	10.8926	10.5628	11.741	10.7083	10.9373	10.7116	10.6892	10.1392	10.8713	8.97853	9.06346	8.99824	9.41072	10.546	10.5869	10.6733	10.5613	11.7647	11.8211	10.6883	10.4361	10.2633	10.1081	10.8547	10.6239	11.5142	12.0954
UBC10	AT5G53300	AT5G53300	13.2017	12.7693	12.4206	13.0095	13.1239	13.27	13.013	13.2027	12.9244	12.3664	12.7087	12.5386	12.9833	13.0133	12.6709	12.5618	12.7161	12.5408	12.045	12.0647	12.1563	13.0096	12.9897	13.0387	12.6134	12.4628	12.2331	12.5552	12.5872	12.5974	12.5825	12.0422	11.9378	12.1575	12.4172	12.6646	12.1403	12.0037	12.0366	12.5708	12.5479	12.4918	12.4325	12.1372	11.8533	11.7936	12.0753
LOX3	AT1G17420	AT1G17420	7.99456	7.50698	5.19561	7.22135	7.34634	7.59677	5.53316	6.41098	5.38557	12.5007	13.5196	11.9396	8.69011	5.73709	7.50625	9.93777	10.2625	10.3142	10.999	11.0573	9.20388	7.92878	9.46722	7.87142	9.02226	9.64791	8.55353	7.19066	8.35703	6.31233	6.34134	6.07514	7.38099	7.41448	6.63689	6.40272	8.38447	6.10303	5.94936	5.60068	6.55958	6.1872	6.51895	6.52911	5.68306	5.83598	6.31903
AT5G15950	AT5G15950	AT5G15950	11.5829	11.5964	10.6024	12.2529	12.2757	12.4177	12.8508	11.6203	11.9218	9.43307	10.2912	8.55133	10.513	10.1252	9.55902	10.1572	10.3741	10.5478	8.65271	8.91884	8.61711	9.60526	9.52288	9.74499	10.2994	10.8448	10.057	10.4921	10.1108	9.48838	9.51573	9.56629	9.99023	9.92542	10.107	10.4377	10.934	10.2425	10.1837	9.97931	10.8686	9.85965	11.0504	11.4877	12.2295	10.1514	10.2526
AT5G05600	AT5G05600	AT5G05600	5.65087	5.71472	4.54745	8.69549	8.54102	8.82573	6.55029	6.05742	5.56086	12.5907	13.1864	11.8368	10.101	7.27384	7.90576	10.2697	10.7544	10.0812	11.9947	12.0359	10.3868	9.74531	10.7733	9.29444	10.4766	10.5599	9.72787	6.29822	6.79196	7.03979	7.41798	7.60189	8.35545	7.42729	5.3945	6.71094	8.2914	4.64929	4.43688	7.45056	8.60019	8.02016	6.43541	5.05397	6.45451	5.35369	4.9328
AT1G65490	AT1G65490	AT1G65490	13.4489	13.1347	12.3038	10.791	11.1386	11.1439	10.4521	9.54428	11.7241	12.3014	12.8209	11.5839	11.3868	11.0876	10.3164	10.7937	11.3507	10.8211	9.53312	9.71923	9.76822	10.4246	8.71595	10.8176	9.55964	9.22538	8.65445	11.0771	11.1205	9.91758	10.1204	9.31566	6.17796	10.5829	11.0359	8.06874	12.0222	11.7592	11.4967	10.8819	11.6875	10.6275	11.0718	11.3172	10.026	11.3587	12.1182
RPL5B	AT5G39740	AT5G39740	10.2443	10.638	11.8028	9.66321	9.93525	9.36513	10.9054	10.9441	9.95987	11.6358	10.6261	11.4875	10.5323	10.8011	10.7788	11.6697	10.8298	11.8504	11.7135	11.6029	11.6773	10.4521	11.0701	10.1219	11.0505	11.6401	12.0059	10.4856	10.0662	10.5848	10.0848	10.638	10.1085	10.1727	10.282	10.5249	10.2594	11.4056	10.929	10.8609	10.1733	10.6485	10.5302	10.787	12.2487	11.4582	11.3211
RPL27AB	AT1G23290	AT1G23290	10.8804	11.0021	12.176	10.8608	11.2889	10.5099	11.3909	11.4786	10.8143	11.8437	11.0789	11.6968	11.3946	11.4183	11.1779	12.059	11.1545	12.0716	11.8602	11.98	11.9402	10.8539	11.6328	10.7343	11.4274	11.8362	12.2175	11.0218	10.5021	10.9445	10.9819	11.285	11.3584	10.5386	10.9091	11.1244	10.7422	11.6596	11.3317	11.4272	10.8651	11.0786	11.0928	11.0819	11.999	11.694	11.6458
HSP81-2	AT5G56030	AT5G56030	12.2839	12.6321	13.4386	10.7176	10.7013	10.8947	10.5648	10.8213	12.1758	10.7331	10.4657	10.4476	10.766	10.8329	10.8495	10.9299	11.1455	10.8859	11.517	11.851	11.7639	11.2354	11.3424	10.799	11.2195	11.1797	11.4508	11.3832	10.3637	10.9686	10.9829	11.0863	10.4299	10.4527	10.7273	10.9437	11.2855	11.7647	11.6815	11.0777	10.9931	11.1776	10.9689	12.0556	11.3377	10.8313	11.0061
HCEF1	AT3G54050	AT3G54050	12.006	11.9752	11.5776	8.72635	9.06337	9.02877	10.4536	9.10784	10.6167	12.0237	12.2028	11.6506	9.80689	10.8	9.92551	10.3146	10.2323	10.2274	11.7548	11.7024	11.4205	10.0967	10.5578	10.043	10.5333	9.17032	10.0605	11.7448	11.568	11.3673	9.06346	9.06915	7.70878	11.5289	11.6676	11.4564	12.2269	12.1153	12.1097	11.184	10.7142	10.8806	11.0821	11.2902	10.9157	12.1639	12.6427
ACT7	AT5G09810	AT5G09810	11.3672	11.4233	11.6812	12.2422	12.1252	11.887	11.7071	11.5467	11.6517	12.256	12.2291	11.9964	12.2151	12.034	11.9425	12.0071	12.1558	11.7693	12.3694	12.5092	12.3155	11.9995	12.4841	11.8812	12.4308	11.8323	11.9352	12.241	11.9837	12.0557	12.1096	12.3212	11.0365	11.9418	12.0673	11.9856	12.0227	12.18	12.2886	12.1589	12.309	12.1702	12.2078	12.0268	11.7772	12.1258	12.042
CHLM	AT4G25080	AT4G25080	10.7797	10.9939	11.1523	7.95323	7.83837	8.03424	10.5529	9.80281	10.2516	11.1778	10.9787	10.9978	9.47755	10.6604	10.5503	11.306	10.1454	11.4329	10.6661	10.1487	10.6572	10.2613	10.8674	9.81853	9.69589	9.28147	11.386	9.74506	10.4426	9.17744	7.22499	7.22566	5.9809	9.95889	10.106	8.90968	11.1711	11.5322	11.3281	11.2611	10.3142	11.1341	11.0413	11.2338	11.4508	11.5523	11.8758
AT1G01100	AT1G01100	AT1G01100	10.9532	10.9659	12.288	11.5114	11.8378	10.5989	11.8641	12.0208	11.0928	11.9897	11.224	11.8309	11.9354	11.763	11.8455	12.3095	11.4183	12.2465	11.7723	11.6042	11.8705	11.4225	11.9713	11.1389	11.5738	11.5196	12.4339	11.3373	10.7908	11.2332	11.1706	11.9058	11.6086	10.8701	11.1081	11.3243	10.5087	11.4332	11.2331	11.5418	10.9802	11.2461	11.0772	11.1252	11.8694	11.4702	11.6125
APR2	AT1G62180	AT1G62180	13.0716	12.3194	10.9903	10.38	10.7127	10.8512	10.8732	9.08156	10.5157	9.98019	10.916	9.52118	10.5926	11.149	9.53224	10.2411	9.41012	9.02516	10.2035	10.552	9.92846	9.41949	10.3159	9.3499	10.0378	9.4391	9.07293	12.5898	11.3615	11.7299	9.41072	10.823	8.25426	11.1602	12.2833	10.9614	12.44	10.9804	11.4882	11.2953	10.7636	10.8041	10.7499	11.468	10.9659	11.3983	11.9477
CPN20	AT5G20720	AT5G20720	10.9746	11.259	12.4803	9.58454	9.9491	8.96615	10.0883	10.134	10.2302	12.0781	11.3399	12.1347	10.6456	11.1057	11.3702	10.919	10.4263	10.8435	11.9038	11.8033	12.0162	10.6459	11.4335	10.4281	10.667	9.86436	11.5778	11.1008	10.7999	10.9647	10.1056	10.2182	8.55301	10.8272	10.9311	10.6127	10.9544	11.9737	11.9561	11.4717	10.4346	11.3573	10.4343	11.0581	11.3972	12.3223	12.3766
AT3G04840	AT3G04840	AT3G04840	10.5108	10.9483	12.1497	9.7287	10.1107	9.32032	10.4648	10.5363	10.1387	11.9944	11.0894	11.9117	10.6656	10.8459	10.6237	11.6454	10.7781	11.6319	12.044	11.8845	12.0718	10.3022	11.1829	9.98646	11.0962	11.4682	12.0205	10.8026	10.2075	10.6141	10.0886	10.4848	10.4065	10.486	10.5638	10.7135	10.5927	11.6974	11.4269	10.8928	10.3304	10.6257	10.5077	10.8805	11.7764	11.8094	11.7501
AOX1A	AT3G22370	AT3G22370	8.60293	8.12973	7.40322	9.58117	9.89859	10.9836	10.4453	10.8747	9.56316	8.36124	9.10779	8.00753	9.57779	8.22896	9.51245	9.09684	9.2504	10.538	8.36817	8.59455	8.0033	9.67957	8.61302	10.2406	8.86951	12.9655	9.3456	9.678	8.93864	9.76057	9.5844	9.98131	11.0057	9.44507	9.22211	10.0202	8.51522	7.25848	7.56542	8.31864	9.27868	8.85247	9.29353	8.70477	11.5251	7.13437	7.69698
RD21A	AT1G47128	AT1G47128	11.9052	11.3658	10.3653	12.9959	12.9122	13.4262	12.2954	12.7756	11.5737	10.0178	10.9642	10.1521	11.3661	11.4052	10.6329	10.4436	10.3961	10.6127	10.1804	10.2041	10.0029	12.0067	10.4597	12.968	10.562	10.7651	10.042	12.1019	11.8631	12.3884	13.2664	12.0764	12.3264	12.0088	12.0471	12.4524	11.7855	10.6851	11.2341	11.1281	11.4545	11.3566	10.9523	10.4946	10.936	10.653	10.8098
AT5G38980	AT5G38980	AT5G38980	12.8989	12.5135	11.8625	11.4067	11.7159	11.4827	11.6797	10.9862	11.8242	11.0167	11.5147	11.0506	11.6922	11.3464	10.8196	10.5684	11.1577	10.4326	9.65897	9.62813	10.4695	11.1825	9.5467	11.2235	11.0818	10.1445	9.66599	12.3896	12.241	12.6674	11.5433	11.1662	6.4152	12.0357	12.3473	11.9502	12.1925	11.4773	11.8559	11.239	11.6788	11.1743	11.7192	11.4573	10.735	11.0342	11.5783
AT1G61890	AT1G61890	AT1G61890	10.8171	10.26	8.82951	7.32177	8.16715	9.05636	7.91764	8.39012	8.41969	12.7873	13.4142	11.8964	9.94804	7.71132	8.61153	10.9261	10.7947	11.2099	10.8626	10.9248	10.1282	8.08537	9.59528	7.71123	9.13585	10.4527	9.71265	9.96727	10.8539	9.86989	8.95973	9.00938	8.56009	9.97534	9.32586	10.7178	8.59817	8.14998	7.70516	6.10086	6.64959	5.59593	7.12529	6.8319	7.73105	7.964	7.60631
PIP1A	AT3G61430	AT3G61430	12.5074	12.2544	11.3417	12.7893	13.123	12.1838	11.4235	11.0486	11.1315	10.6776	11.4522	10.2361	10.675	10.5566	9.59475	9.89717	9.54803	9.60455	10.8386	10.9007	10.8909	9.85015	9.63422	10.1681	10.0167	9.08359	8.94544	11.6941	11.57	11.5039	11.231	10.4957	7.68305	11.0989	11.7256	11.0116	12.6916	12.0235	12.4803	11.5314	11.8735	10.9348	11.5218	11.1333	11.0996	11.4152	12.0672
AT5G19510	AT5G19510	AT5G19510	11.1589	11.2113	12.3134	10.5842	10.9434	10.1413	11.5938	11.8242	10.9319	11.8216	11.1323	11.722	11.4506	11.5527	11.7286	12.0048	11.2673	12.0763	11.7041	11.6792	11.8538	11.1446	11.8847	10.9063	11.4071	11.6203	12.2314	10.9708	10.4883	10.9576	10.3059	10.9272	10.1677	10.3606	10.6307	11.0487	10.4925	11.4872	11.2902	11.5704	10.6792	11.1932	10.9486	11.1786	12.0024	11.5269	11.6413
COR47	AT1G20440	AT1G20440	11.0258	10.1381	9.37963	12.4548	12.3518	12.5695	10.3891	11.5481	10.1433	12.1883	13.089	10.8814	10.9538	10.5954	9.89335	10.6838	10.2505	10.5977	12.5026	12.0501	11.0149	10.4611	11.7082	11.088	9.46273	9.35882	10.6184	11.4901	11.3653	11.4586	11.6957	10.5329	12.4748	10.6425	11.1616	12.1239	9.24403	9.54292	9.35704	9.55658	10.2418	8.95997	9.10944	8.1195	8.32599	8.53694	9.01099
GER3	AT5G20630	AT5G20630	7.88795	9.34373	12.4327	2.9233	2.95964	3.32917	4.52138	9.54977	8.87729	10.7485	6.40115	11.7329	4.10031	6.49732	7.92834	9.17969	7.66267	8.27367	9.32438	6.51414	10.8271	6.74046	9.3855	7.17411	2.26414	3.49196	11.0161	2.49155	5.9475	2.53528	3.05006	2.58061	3.25491	4.90038	2.23823	2.27491	6.27535	11.4868	10.1787	9.26648	5.39067	8.89724	7.17028	9.06667	7.9618	12.7176	11.9046
PGR5-LIKE A	AT4G22890	AT4G22890	11.7726	11.7653	11.4158	9.27789	9.54059	9.34737	10.2552	9.31859	10.6348	11.9637	12.3907	11.7025	10.0482	10.3838	9.58767	10.0896	10.5363	9.93847	11.6251	11.6249	11.5458	9.81996	9.95064	9.89071	10.6966	9.41144	9.64915	12.1283	12.0729	11.7141	9.44362	9.50858	7.70878	11.9868	11.9627	11.6346	12.0219	11.7817	11.7766	10.8896	10.5213	10.3309	10.9054	10.911	10.2514	12.0816	12.2479
NEET	AT5G51720	AT5G51720	11.8865	11.7499	12.5235	5.93953	6.27977	5.76605	8.45619	8.5683	11.0481	12.4983	11.9916	12.063	8.64816	9.22262	10.2612	10.7327	10.6208	10.4967	12.0978	11.6005	11.9522	9.14009	10.3045	8.88578	9.81652	8.07139	10.9366	10.1669	9.45475	8.38642	6.48621	5.31015	5.29003	11.0722	10.1117	7.99469	11.2192	11.5533	11.7122	9.51895	8.04631	9.27419	9.87769	10.8778	9.75867	11.7596	11.6447
AT2G36160	AT2G36160	AT2G36160	10.5042	10.5706	11.8208	11.114	11.2976	10.8465	11.6218	11.8512	10.9803	11.4669	10.5978	11.3942	11.6784	11.5214	11.8205	12.1189	11.378	12.1317	11.4096	11.4101	11.5052	11.3274	11.883	11.1755	11.4487	11.8108	12.1984	10.6047	10.1441	10.7116	10.3476	11.077	10.5089	10.1095	10.3566	10.6807	10.1069	11.3075	10.9135	11.5822	10.9417	11.3346	11.2849	11.0689	11.9195	11.2881	11.2397
NCED4	AT4G19170	AT4G19170	11.2585	10.7024	8.34139	9.31084	9.62588	9.17688	9.23219	8.99972	9.33689	8.03439	9.45347	7.94148	9.22515	9.28734	7.20709	6.68032	8.2694	7.31074	9.84351	10.6797	9.73683	9.54122	7.61134	9.49009	10.1461	8.02832	6.83882	12.6443	11.7439	12.2598	9.39245	9.31117	5.93804	11.7642	12.2541	11.2041	11.9268	10.0451	10.3685	9.84494	10.2154	9.39547	9.84453	9.44486	8.35179	9.78704	10.1837
AT3G24830	AT3G24830	AT3G24830	10.8065	10.9584	11.9975	10.2004	10.6118	9.50784	11.1547	11.4576	10.5765	11.6451	10.8529	11.6414	10.912	10.9415	10.955	11.861	10.8547	11.882	11.5767	11.5191	11.6364	10.6864	11.0975	10.3866	10.9816	11.4204	12.0107	10.7273	10.4524	10.7736	10.0522	10.4687	9.87566	10.4058	10.5929	10.9126	10.7858	11.8104	11.4082	11.2792	10.5776	10.9978	11.0143	11.0893	12.0874	11.7861	11.7437
AT2G47610	AT2G47610	AT2G47610	10.1841	10.4754	11.5539	9.4016	9.66334	8.84484	10.7703	10.866	10.0751	11.3241	10.4504	11.3311	10.4695	10.6555	10.7389	11.4855	10.6301	11.7333	11.514	11.4852	11.4663	10.3321	11.1746	10.0331	10.837	11.3903	11.9402	10.1588	9.77149	10.0845	9.89891	10.3642	9.86997	9.92881	10.107	10.2101	10.3647	11.5466	11.1097	10.9374	10.3456	10.7256	10.5818	10.9307	12.246	11.4361	11.2988
ATCG00090	ATCG00090	ATCG00090	12.1814	12.1054	11.4356	9.94094	9.63276	9.71936	9.35298	9.12999	11.4058	12.3217	12.594	11.7102	10.7419	10.3764	10.6028	10.7445	11.102	10.2723	12.0767	11.9777	11.7174	10.0713	11.0857	9.92334	11.4442	10.3924	9.9954	11.8883	12.0735	11.299	8.70725	9.80714	9.12092	12.1029	11.6097	11.7215	9.92382	10.5327	10.1081	9.02733	9.21562	8.81053	9.4778	10.0799	8.64337	8.45439	10.2496
TCH3	AT2G41100	AT2G41100	10.9711	10.3133	9.80681	9.51554	9.48841	11.5238	9.73032	10.1285	11.3866	12.0454	12.1587	12.0123	11.1494	9.95638	11.1653	10.5366	11.6848	10.2347	9.31591	9.02581	9.42515	10.4184	8.83331	10.339	9.48069	12.7178	8.25535	6.26814	8.53842	4.90953	8.29353	9.7911	10.6973	7.08328	5.92449	5.52303	10.2954	10.3875	9.45764	9.23588	10.3389	10.3272	10.3209	10.3952	8.88099	9.11672	9.21193
CaS	AT5G23060	AT5G23060	12.3751	12.157	11.9187	9.13798	9.45773	9.2599	10.9672	8.9299	10.7142	12.0241	12.324	11.4257	10.8216	11.6277	10.8817	11.3668	10.8531	11.2412	11.7032	11.9601	11.4833	10.3173	11.5474	10.0936	11.3575	10.3646	11.2487	12.2266	11.7098	11.8078	8.11934	9.79432	6.56356	11.9266	12.189	11.0854	11.8394	11.7249	11.644	11.3945	10.4314	10.959	10.7816	11.1418	11.3436	12.0108	12.1855
HSPRO2	AT2G40000	AT2G40000	13.0507	12.1787	9.21354	10.3002	10.3425	11.9137	9.82849	11.3773	10.625	11.2485	12.0648	11.9829	10.8111	10.8231	10.4223	7.40507	9.1032	8.67054	10.8891	11.3341	11.0536	10.3089	6.60799	10.7526	7.78786	12.3794	6.25267	11.2264	12.431	8.39029	9.29746	6.82026	9.01148	11.3795	11.1611	7.82877	10.794	10.3364	9.58975	9.25126	10.2144	9.88209	9.57998	9.1361	7.98596	9.9379	10.0764
GRX480	AT1G28480	AT1G28480	7.85745	5.71472	3.33932	8.88795	9.19943	10.8716	7.96052	7.47223	7.27814	10.1713	10.6624	8.91124	10.1669	5.73709	9.01117	8.44995	10.4015	9.08563	6.48455	7.10819	6.93171	8.73966	5.56777	8.38395	7.84948	13.003	6.3669	4.74058	6.4521	2.53528	5.20289	5.51161	6.91251	4.86315	3.95335	2.70465	6.00704	4.15546	3.14013	5.55733	8.72448	7.78919	7.15544	8.45598	6.03542	2.24422	2.39616
AT5G07090	AT5G07090	AT5G07090	10.2404	10.7784	11.8546	8.87699	9.39027	8.57417	10.8738	10.8867	9.89588	11.6462	10.8832	11.6326	10.2947	10.7458	10.8475	11.6727	10.554	11.7748	11.6566	11.5431	11.711	10.3139	11.1662	9.88409	10.7474	10.9945	11.8506	10.4856	10.2702	10.4015	9.61361	9.83715	8.4035	10.2648	10.3566	10.4333	10.6694	11.7939	11.354	10.9877	10.1903	10.9666	10.6255	10.9043	11.9631	11.77	11.6379
ERD9	AT1G10370	AT1G10370	10.8145	11.2467	11.3919	8.336	8.56281	7.43804	6.57257	7.56186	9.82607	11.4669	11.6406	10.6464	8.87928	8.86799	8.78652	9.39987	9.04039	8.85872	12.4228	12.5488	11.1436	8.06175	11.4346	9.11775	9.93615	9.18019	10.5976	11.0997	10.677	9.27272	7.30531	7.88799	7.3649	10.5482	10.7576	10.6134	11.3489	11.3888	11.3724	10.4993	9.15159	9.53978	8.67204	10.7653	9.14386	11.3884	11.7363
BCB	AT5G20230	AT5G20230	10.5668	9.97209	8.85198	11.8082	11.6622	12.6955	9.78144	10.4712	10.4051	12.8058	12.0043	12.3908	12.0871	10.5044	10.8894	10.1627	11.4317	10.8238	11.7337	10.606	11.01	11.3967	10.5685	12.5804	10.2023	12.14	10.151	7.81796	9.41161	4.77398	8.8435	7.98711	12.0515	7.88743	7.327	6.06554	9.61935	9.61829	9.44274	9.78161	12.033	11.1307	8.88493	9.62979	9.29417	7.83475	8.13347
TPI	AT3G55440	AT3G55440	11.202	11.2678	11.5406	11.9326	12.1355	11.9785	11.9408	11.5343	11.4248	12.2744	12.5597	11.9279	11.7844	11.4554	11.4736	11.6082	11.6348	11.7181	12.3849	12.2993	11.9229	11.1577	12.0541	11.0373	12.0176	11.4648	11.8471	11.495	11.3979	11.3381	11.1769	11.8348	10.4491	11.4237	11.566	11.5394	11.6322	11.5378	11.9575	11.997	12.0099	11.8871	11.9064	11.361	12.0472	11.4855	11.5996
TRX-M4	AT3G15360	AT3G15360	11.7185	11.5438	11.5426	10.1096	10.315	10.07	10.3518	9.87016	10.8983	12.2212	12.4166	11.8476	10.868	11.1749	10.5624	10.567	11.1133	10.391	12.1452	12.1841	11.8599	10.753	11.096	10.7896	11.5912	10.3427	10.577	12.1789	11.9729	11.8701	10.5671	10.6469	9.08699	11.93	12.1124	12.0686	11.906	11.6241	11.7865	10.8395	10.6269	10.5327	10.7907	11.0034	10.2136	11.6093	11.9328
CPN60A	AT2G28000	AT2G28000	10.1903	10.9185	12.1249	8.39866	8.59842	7.25967	10.274	10.1647	9.53193	11.7519	11.0496	11.7946	10.2155	11.062	11.582	11.3334	10.2756	11.5041	11.6496	11.5397	11.9062	10.758	11.6976	10.232	10.1725	9.65383	11.9323	10.7321	10.6362	10.4988	9.12376	9.6236	8.77016	10.7142	10.574	9.93865	10.2658	11.5378	11.0155	11.0115	9.89373	11.2231	10.4001	10.5317	11.6338	11.937	11.7617
AT2G37190	AT2G37190	AT2G37190	10.0102	10.1097	11.5025	10.0277	10.3961	9.43825	11.3276	11.5692	9.95726	10.9297	9.94711	10.9261	11.3201	11.8259	12.1537	11.9323	10.8169	12.0526	11.2329	11.2252	11.2549	11.744	12.1785	11.2356	10.9243	11.3782	12.0863	9.79865	9.41708	9.9256	10.1497	10.6344	9.7543	9.37738	9.46137	9.89096	8.99351	10.4734	9.97403	11.5508	10.1388	11.5073	10.1777	10.1372	11.7382	10.4382	10.355
AT4G40040	AT4G40040	AT4G40040	12.2018	12.0643	11.8159	12.5703	12.5031	13.4025	12.3733	12.5201	12.1747	12.052	12.5277	12.0036	12.8844	12.5028	12.2185	11.9442	12.1014	12.077	12.1661	12.3289	12.088	12.7499	12.2708	13.074	12.209	12.4406	11.7887	12.3203	12.3342	12.3219	12.8852	12.2998	13.1699	12.3965	12.4832	12.2623	12.3028	11.8266	11.8179	12.5436	12.6869	12.4051	12.2132	11.6461	11.9637	11.95	11.9319
EMB1080	AT3G48930	AT3G48930	10.6132	10.7737	12.078	10.1489	10.4261	9.57041	11.1225	11.2874	10.2791	11.6186	10.7844	11.4592	10.8548	11.0684	11.0863	11.693	10.6901	11.8926	11.6829	11.5331	11.6161	10.7043	11.2894	10.2781	10.8788	11.5245	12.0103	10.5911	9.94793	10.4862	10.1112	10.5212	10.292	10.0309	10.3454	10.6288	10.4154	11.6195	11.3562	11.0457	10.5603	10.8211	10.7756	10.9911	12.0493	11.4837	11.5627
CLPC1	AT5G50920	AT5G50920	11.9077	11.986	11.7983	11.4535	11.2277	11.7967	11.4081	11.519	11.5881	11.8056	12.2147	11.6593	11.161	11.2883	11.0116	11.2854	11.4016	11.2896	11.8942	12.0364	11.5638	11.6227	11.2997	11.7509	11.6035	10.9036	11.036	12.4597	11.9574	12.7932	12.2203	11.9667	11.4903	12.3735	12.2245	12.6155	11.8437	11.7969	11.9543	11.0467	11.2646	11.339	11.451	11.1257	11.2009	11.908	11.6223
TIP2;2	AT4G17340	AT4G17340	11.4924	11.0045	9.86479	13.3176	13.3312	12.64	11.5468	10.9892	10.5438	11.1411	12.418	10.3628	11.3097	11.0044	9.50996	10.7672	11.1226	10.3903	11.0216	11.7493	11.1215	10.174	10.2221	10.5092	11.5227	10.4802	9.37661	12.3471	11.7558	11.6262	10.548	9.75184	6.74856	11.3609	12.1402	10.8886	12.2977	11.1199	11.9305	11.0623	11.7575	10.2014	11.474	10.6526	10.5407	10.0646	10.8946
NDPK1	AT4G09320	AT4G09320	11.0097	11.2148	12.1387	10.8055	11.178	10.3783	11.2623	11.3881	10.7158	12.1298	11.4219	12.0501	11.4868	11.4469	11.0644	11.894	11.3206	11.8844	12.0199	11.9505	12.1426	11.0597	11.3614	10.8677	11.6139	11.6045	12.0134	11.3643	10.9737	11.2578	10.8894	11.1252	9.61839	10.9719	11.0897	11.3565	10.9437	11.8304	11.6708	11.4426	11.0987	11.185	11.182	11.1881	11.8946	11.8644	11.9606
AT2G27720	AT2G27720	AT2G27720	10.6815	10.8924	12.4096	10.8608	11.4418	10.131	11.681	11.7517	10.953	11.8845	10.984	11.9177	11.5323	11.6708	11.7473	11.8501	11.0818	12.092	11.7276	11.5777	11.8453	11.252	11.8486	11.0687	11.2715	11.4859	12.3118	10.8421	10.5633	10.781	10.5806	10.9714	10.4414	10.4936	10.6261	10.9258	9.82766	11.0513	10.7907	11.1902	10.2255	10.876	10.4072	10.6501	11.5033	11.0332	11.2622
MS2 AT3G03780	AT3G03780	AT3G03780	9.36198	10.4684	10.4738	7.96363	8.0486	7.3868	8.75548	8.30182	8.97858	11.4908	11.4341	10.9649	9.29024	9.52863	9.51742	11.0333	10.5868	10.5633	11.5974	11.5324	11.5947	9.15505	10.9767	8.84094	10.989	9.89664	11.18	11.5334	11.0814	10.457	8.5513	9.50071	7.01916	10.9796	11.3567	11.092	11.5664	11.1507	11.3451	10.2268	9.698	10.0456	10.7079	10.4834	10.2877	11.8805	12.3242
AT4G12735	AT4G12735	AT4G12735	4.76138	4.06238	3.0145	7.16838	7.64762	8.88232	10.0893	10.6871	7.48074	5.24559	5.56792	3.87082	8.51963	4.84142	8.05003	8.3429	8.19112	10.1761	2.45964	3.9507	3.11969	6.97774	5.53349	6.4588	7.7826	12.9242	8.8439	3.78062	4.57361	3.48383	5.9664	7.81369	8.45761	4.0154	3.17429	3.03533	3.81272	2.933	3.26584	5.00037	6.23553	6.13378	7.56781	6.85809	10.6306	2.24422	2.96199
SIP3	AT4G30960	AT4G30960	10.6463	10.2869	9.15019	11.6903	12.108	11.7142	10.9614	11.5597	10.4996	8.77854	9.21198	8.48867	10.8216	10.987	10.3751	10.6637	10.166	10.6635	9.50061	9.74114	9.61838	10.9884	10.4262	11.233	10.2014	10.4849	10.0996	11.6338	11.4728	12.7831	12.4709	12.295	13.6502	11.2032	11.464	12.5698	10.2594	9.60353	9.62684	10.8625	11.1613	10.6533	10.6302	10.0271	10.3148	9.14708	9.55513
TROL	AT4G01050	AT4G01050	11.8009	11.9757	12.0719	9.4206	9.63619	9.47959	11.4747	10.5731	11.1533	11.7128	11.6672	11.7306	10.2992	11.2466	10.9216	11.8087	10.9084	11.9661	11.5798	11.3532	11.4197	10.9255	11.5729	10.6549	10.8677	10.4142	11.9046	11.0508	11.2108	11.102	8.96387	9.89985	9.20014	11.1797	10.9724	11.0227	11.1692	11.732	11.559	11.3231	10.6102	11.1904	11.087	11.1673	11.7835	11.7882	11.7071
emb1473	AT1G78630	AT1G78630	11.4924	11.6846	12.6173	8.37548	8.96315	8.45486	10.7937	10.0121	10.6861	12.3055	11.653	12.2005	9.85071	10.8044	10.4782	11.2492	10.3073	11.2364	11.9614	11.5442	11.7896	10.1462	10.8981	10.0311	10.1974	9.3266	11.5682	10.8459	11.1525	10.8703	8.58923	9.12911	7.60301	11.1079	10.8553	10.8602	10.9	11.7814	11.6712	10.8819	9.82054	10.4263	10.5143	10.7502	11.0334	11.9278	12.0501
BBC1	AT3G49010	AT3G49010	10.5715	10.8038	12.0302	9.8736	9.96283	9.3783	10.5752	10.7093	10.2193	11.6902	10.7555	11.5814	10.868	10.9314	10.8176	11.546	10.5461	11.6362	11.7564	11.5109	11.8077	10.6205	11.0618	10.2233	10.9556	11.289	11.8156	10.673	10.0755	10.7788	10.368	10.5511	9.92588	10.1234	10.4032	10.5845	10.7232	11.9163	11.5678	11.0418	10.6165	10.9484	10.6548	11.0576	11.9807	11.7712	11.8444
DI19	AT1G56280	AT1G56280	12.4105	11.6739	10.5824	12.1028	12.1885	11.9626	12.0453	12.156	11.4163	10.8795	11.7472	10.6264	11.8315	12.1659	11.6555	11.7234	11.1507	11.7709	10.6118	11.0417	10.6904	12.0036	12.1049	11.8628	11.2892	11.0453	11.2684	12.2373	12.1037	12.7843	11.8879	11.3641	11.5169	11.957	12.104	12.5872	11.7545	10.8545	10.6378	12.1063	11.8218	11.8067	11.331	11.0736	11.5072	10.6444	10.9729
EIF4A1	AT3G13920	AT3G13920	11.6586	11.5059	11.8891	11.7167	11.4554	11.7493	12.1089	12.0968	11.6922	12.0026	11.7974	11.7318	11.8242	11.419	11.6447	12.0304	12.1114	12.0076	11.9941	12.0196	11.8644	11.5036	11.6216	11.3529	12.0348	11.8978	11.9785	11.3736	10.7299	11.2429	10.7623	11.3942	10.7967	10.7799	10.9311	11.1374	11.1413	11.7628	11.4415	11.4033	11.4301	11.3965	11.8697	11.8556	11.7124	11.61	11.651
AT5G44020	AT5G44020	AT5G44020	11.5743	11.8838	12.047	5.5555	6.01053	6.73952	8.26075	7.86452	10.0871	11.8351	11.2705	11.8628	10.0193	11.7067	11.1676	11.4427	10.6758	10.0549	11.2098	11.0095	11.1903	8.69429	11.0671	8.91203	10.3222	7.99516	10.3597	5.69774	7.37452	5.50235	3.80657	3.31409	4.49102	5.91395	6.32422	4.59406	10.8245	11.9037	11.6162	11.1764	10.0465	10.3197	9.8399	10.2861	10.0003	12.2516	12.3475
petB	ATCG00720	ATCG00720	10.0102	10.5999	10.1373	8.30362	8.0486	8.7193	8.48878	8.46753	9.18453	10.491	10.5114	10.1317	8.44537	8.28708	8.63917	8.81761	9.44638	8.196	9.96763	10.66	9.58646	9.01035	8.79041	8.10931	9.31764	8.30882	7.89816	10.4349	10.2712	10.2575	7.49991	9.01215	9.09188	10.1253	9.90782	9.86392	12.2536	12.1517	11.7976	10.7521	10.7349	10.8253	11.0179	11.5116	9.83383	12.3804	12.0736
CCoAOMT1	AT4G34050	AT4G34050	11.4194	11.5331	11.6157	11.2583	11.429	10.415	9.9117	10.6858	11.0171	11.1929	11.1969	10.824	10.7518	9.95837	10.1471	10.2136	10.825	10.266	10.1701	10.0282	10.5552	10.2175	9.62	10.3788	10.4185	10.1842	10.1167	12.2981	11.8813	11.7017	11.0181	10.7568	7.50363	11.7306	12.1278	12.5197	12.0326	11.8159	12.1573	11.0892	11.385	10.9676	10.882	11.3149	10.6025	11.7131	11.8533
CIPK7	AT3G23000	AT3G23000	11.7596	11.1025	10.1242	11.5789	11.4994	11.5356	11.9146	11.7659	11.2015	8.33981	8.88668	8.80381	9.54261	9.39404	9.07665	10.3845	10.5907	10.779	9.47193	9.88362	9.65243	9.47718	9.38069	9.26419	10.7628	10.8638	10.2025	12.108	11.2103	12.3206	10.0999	10.5961	9.95304	10.9697	11.4552	12.8201	10.9133	9.38864	10.0459	9.33225	9.74215	9.34053	11.2626	10.8816	10.8294	9.21492	9.68928
AT5G21020	AT5G21020	AT5G21020	12.1865	11.3005	10.6463	10.3722	10.6631	10.5857	10.7257	10.613	10.5765	10.1187	11.3835	10.1134	9.61456	9.66152	9.37125	10.0421	9.51828	10.0695	9.18811	9.72046	9.58792	9.11735	9.6839	9.21584	9.61539	9.09407	10.1119	12.1254	11.2501	13.0582	9.69289	10.5154	11.7258	10.703	11.4848	12.4463	11.391	9.93044	10.224	9.47594	9.08661	9.22395	9.76489	9.43909	9.97936	9.44461	9.66703
AT3G14067	AT3G14067	AT3G14067	10.4388	10.3367	9.36408	10.7192	10.6257	11.0915	10.7094	10.7178	10.454	9.79969	10.5699	9.68539	9.92481	9.81208	9.17119	10.1243	10.0613	10.288	10.1047	9.92354	9.96955	10.1759	9.76184	10.4236	10.0356	9.95433	9.58373	12.1117	11.92	12.5109	11.3929	11.2337	10.2662	11.9445	11.801	12.8373	11.088	9.96864	10.3711	9.84944	10.5854	9.79013	10.4723	10.0781	10.1252	10.0556	10.1488
RPS9	AT1G74970	AT1G74970	11.7479	11.8133	12.5937	9.13338	9.79806	8.97196	10.6751	10.2498	10.7881	12.2902	11.7432	12.2277	10.3202	11.0405	11.2089	11.5956	10.4777	11.3104	11.9179	11.5569	11.8366	10.488	11.5004	10.3662	10.1644	9.48627	11.5992	10.8176	11.2839	10.6223	8.62096	9.35549	7.75889	11.0974	10.8006	10.8077	10.9828	11.8456	11.6261	11.4959	10.2951	10.9657	10.5908	10.8466	11.0889	11.9932	11.9706
CSD1	AT1G08830	AT1G08830	10.7523	11.2932	11.7319	11.3444	11.8919	11.9069	10.9331	11.8304	12.1162	11.2166	9.20682	11.6836	10.4288	10.687	10.7109	10.8807	11.8153	10.7589	11.2432	9.38084	11.4865	11.1248	11.0168	11.3083	11.4371	10.8816	11.3328	8.95661	10.644	8.90472	11.5645	10.6576	11.6843	9.68529	9.44362	10.3852	11.6518	11.5658	12.0893	11.8812	12.447	11.875	12.3606	12.0098	11.3045	11.0673	11.2799
FBA8	AT3G52930	AT3G52930	10.898	11.2134	12.0794	10.9936	10.8593	11.114	11.1291	11.4184	11.7148	11.7361	11.4208	11.8075	11.2954	11.1774	11.752	11.8366	11.8705	11.9363	11.7821	11.5445	11.6808	11.0557	11.8961	11.1194	11.7229	11.9569	12.2946	11.35	11.0929	10.8288	11.4119	11.9806	11.8958	11.0065	11.3464	11.1787	10.9817	11.6961	11.6938	11.4418	11.3593	11.4256	11.717	11.8507	11.7335	11.6647	11.4796
BAM5	AT4G15210	AT4G15210	3.95985	5.03911	3.92811	7.43073	7.27772	5.47039	4.73403	4.95565	4.57302	10.8552	10.9262	11.3765	8.55032	7.98545	7.36992	9.88038	9.14792	9.54183	11.9229	12.649	11.6286	8.50874	11.8133	6.93904	10.8496	10.583	11.023	4.69609	6.74639	3.59527	5.41081	4.15975	5.70228	7.40803	4.89988	4.69104	6.31792	7.46858	7.72718	8.84559	6.72399	7.69551	7.55656	3.7803	7.75586	7.66157	7.10834
SHM4	AT4G13930	AT4G13930	10.7715	11.3594	12.2224	8.93627	9.14268	8.45486	9.17144	9.61142	10.5507	11.5203	10.9688	11.4243	9.69917	10.093	10.1438	10.8419	10.7459	10.5471	11.9912	11.9466	11.5955	9.76006	11.7282	9.55816	11.0268	10.3146	11.5469	10.8215	10.7204	9.62433	9.22704	9.44025	7.95436	10.6049	10.7925	10.6342	11.1994	11.888	11.8044	11.023	10.0257	10.5828	10.4663	11.3333	10.6439	11.9107	11.7711
AT5G35480	AT5G35480	AT5G35480	12.3295	12.0169	11.644	11.785	12.9143	11.0915	11.998	10.3833	11.1737	11.5596	12.2393	10.567	11.7682	12.2373	11.2074	11.6441	11.0364	11.3706	11.561	12.0121	11.677	11.1493	11.6579	11.0183	10.8325	10.2466	10.1282	11.8652	11.6638	11.5951	7.93807	9.3642	6.59149	11.0413	12.0237	10.6792	11.3304	10.8403	10.7149	12.4865	12.0218	11.7914	11.7395	10.7479	11.6167	10.6979	12.0647
DHS1	AT4G39980	AT4G39980	7.20638	8.14158	8.89899	5.8072	5.92337	6.59652	6.92408	7.44893	7.49521	10.6604	11.4028	10.6865	8.75303	7.8634	8.05003	9.37931	9.56171	9.21922	12.4819	12.4829	11.5779	10.2972	11.6957	8.50386	11.3751	10.9384	10.3763	8.50973	8.23034	7.61006	6.57529	8.64525	8.66238	8.61741	8.07919	8.69263	9.1232	8.67395	8.59272	8.09818	7.83716	7.94074	7.81448	8.2734	8.03021	9.36936	9.25435
TIR	AT1G72930	AT1G72930	12.4292	12.2673	10.8362	11.6238	11.9626	12.2741	11.6228	11.3469	12.1227	12.099	12.2358	11.6394	12.5355	11.7331	11.6009	10.9749	12.1439	10.4838	10.7016	10.8224	11.1605	12.0211	10.6194	12.0279	12.0243	11.8471	9.86216	10.8046	11.5282	8.8884	10.2994	10.7157	8.2455	10.8881	11.3073	8.04601	12.628	11.6433	11.6017	11.1813	12.1992	11.5513	11.4747	12.1469	10.5139	10.9936	11.6673
AT3G53870	AT3G53870	AT3G53870	10.3792	10.7154	11.5312	10.1282	10.1992	9.62302	11.1399	10.9586	10.228	11.4501	10.8546	11.3518	10.675	10.6978	10.4858	11.4454	10.6892	11.5281	11.5317	11.4457	11.5533	10.446	10.9379	10.159	10.9579	11.1339	11.5547	10.9149	10.4823	10.8029	10.3059	10.552	10.2641	10.437	10.6808	10.8192	11.0464	11.8626	11.6389	11.1844	10.9367	11.0901	11.2195	11.2459	12.1535	11.8721	11.9197
AT5G19940	AT5G19940	AT5G19940	11.8814	11.7975	11.6133	9.5539	9.8639	9.81613	11.0765	10.1557	10.9739	11.9079	12.1793	11.6103	10.2826	11.0415	10.446	10.732	10.6513	10.6879	11.6292	11.5084	11.5585	10.3518	11.1415	10.1753	10.8471	9.75415	10.4724	11.6364	11.6994	11.5309	9.54359	9.72844	8.1169	11.4459	11.6535	11.3228	12.1354	12.049	12.0127	11.6752	11.0801	11.2207	11.2556	11.3822	10.9818	12.0996	12.3604
FIB	AT4G04020	AT4G04020	9.98456	9.94022	9.68515	9.41682	9.88712	9.65224	8.67795	8.38398	9.23282	10.4453	11.4989	9.78581	9.27194	8.37903	8.61617	8.17683	10.6686	8.15212	10.938	11.6095	10.6495	9.01035	9.74509	8.80403	11.1865	10.1587	8.82403	12.3987	11.4898	11.0668	9.20627	9.44231	9.06724	11.5079	11.8853	12.1772	11.9861	10.9167	11.2461	9.82566	10.3142	9.75739	10.5976	11.4559	9.83633	11.1242	11.8651
LTPG1	AT1G27950	AT1G27950	11.9268	11.9864	12.2753	7.75196	7.77755	7.55096	8.30135	8.69257	10.7939	12.1856	11.4241	11.9832	9.03569	10.7296	10.6063	11.7496	10.8697	11.1146	11.9584	11.4509	11.8511	8.17618	11.6165	8.8226	10.5504	9.05348	11.6159	11.0602	10.8799	9.88915	9.06346	9.07181	10.0939	10.5379	10.9651	11.1979	11.2548	11.9405	11.5412	10.5726	9.51105	9.78797	10.04	10.9466	10.5957	11.5445	11.6651
PP2CA	AT3G11410	AT3G11410	10.5933	9.75975	8.22323	10.6042	11.0385	11.399	10.0099	10.3491	10.2749	9.10817	9.9838	8.43798	10.1233	9.17894	8.41767	8.50356	9.25762	8.39159	9.40164	9.99213	9.50029	8.99796	8.85081	9.55816	9.16644	9.69227	7.87904	11.8833	11.3377	12.5426	11.8944	11.0564	11.1871	11.2449	11.3681	12.8716	10.001	9.59269	9.65296	8.65312	9.53191	8.64858	9.43389	9.0191	8.66598	8.51965	8.70065
APA1	AT1G11910	AT1G11910	11.3545	11.0239	10.8751	13.0132	12.9164	13.1697	12.0503	12.2124	11.8155	10.6365	11.2124	10.8955	12.01	11.2129	11.2677	10.9256	11.4606	10.8227	10.6925	10.6225	10.814	11.7661	10.6989	12.2551	11.4819	11.1164	10.692	11.7931	11.501	12.3884	13.2479	13.1401	12.8578	11.6773	11.7637	12.1832	11.6621	11.0424	11.3742	11.4912	12.0881	11.6044	11.936	11.2259	11.2283	10.9158	10.8889
KTI1	AT1G73260	AT1G73260	3.61563	3.10781	2.32775	13.3506	13.7738	13.7819	9.98206	10.2174	6.78413	2.38186	2.84363	3.07536	10.5091	6.49732	9.27469	2.94065	2	2.74487	2.45964	2.4417	3.11969	9.3168	3.07972	11.305	3.58938	9.0463	2.93826	2.68611	3.3262	3.79524	8.09694	5.54262	8.07795	2.46505	2.44264	3.176	2	2.44752	2.4868	7.30091	10.2518	10.5139	2.63485	2.23134	2.17837	2	2
JAZ7	AT2G34600	AT2G34600	7.12337	6.57378	3.0145	7.98421	7.862	8.55882	5.9792	5.96186	4.45956	12.6269	13.4257	11.2985	9.47489	5.77369	7.27913	8.48887	8.91814	8.98146	7.48255	8.6315	7.0974	6.79878	5.8992	7.41342	7.13571	8.66097	5.93233	6.3422	7.65906	3.79524	6.26306	6.29135	8.06805	7.14662	4.63385	4.9481	6.54993	2.44752	2.4868	5.0637	6.54793	5.76357	3.8398	3.7803	4.38165	4.11108	3.17887
PSRP3/1	AT1G68590	AT1G68590	11.6037	11.7494	12.6206	8.60538	8.90177	8.38695	9.5748	8.79777	10.528	12.2513	11.8389	12.0666	9.97469	10.5942	9.68371	10.3196	10.1219	9.89305	11.8936	11.6541	11.6876	9.31347	10.0048	9.48135	10.3095	8.60101	10.5536	11.0247	11.0378	10.6716	9.1348	9.11371	7.34862	11.0054	11.0954	10.2101	11.1154	11.782	11.8878	10.6706	9.41647	10.009	9.76611	10.4371	10.0484	11.8384	12.0566
AT5G56980	AT5G56980	AT5G56980	8.83455	8.29803	6.76926	10.0741	10.5108	9.85749	8.25042	8.62659	8.09819	12.7419	13.2616	11.8957	9.49344	6.77516	8.23651	10.7949	11.1351	10.8286	9.00639	9.19935	8.41049	8.31587	8.73869	8.41487	9.44952	10.5843	9.49649	8.09569	8.92592	6.93776	7.66121	7.13703	8.53155	8.21374	7.65464	6.96476	7.98731	7.29234	6.83246	5.55733	7.03078	6.07831	7.15544	7.55203	6.97875	7.03236	6.83247
AT1G64510	AT1G64510	AT1G64510	11.3082	11.5861	12.5089	8.054	8.71977	8.09934	9.58717	9.26288	10.3364	12.1804	11.5999	12.1287	9.26887	10.2425	9.6204	10.2498	9.78634	9.88791	11.8465	11.4308	11.6784	9.36263	10.1701	9.32732	9.63302	8.46499	10.5765	10.3002	10.8956	10.0928	7.97128	8.26785	7.01916	10.8114	10.4312	10.0752	10.9035	11.8136	11.7007	10.6839	9.58278	10.1981	10.0299	10.3817	10.2841	12.0994	12.0281
AT3G45730	AT3G45730	AT3G45730	8.45462	8.28205	7.37689	9.59126	9.81025	11.9457	11.841	12.9497	9.59373	8.04767	8.88021	7.96213	9.83417	7.82904	9.6088	8.60242	8.60373	10.1411	6.48455	5.72016	6.73392	9.39765	6.95735	10.1626	7.40563	12.6124	8.38978	6.19007	7.08525	5.58568	7.29223	7.82634	8.2189	6.08537	5.3945	5.67302	8.40765	8.12389	7.51567	7.39008	8.8413	8.31832	9.65443	7.28229	9.84047	6.29497	6.53106
RGP2	AT5G15650	AT5G15650	9.45318	9.56448	10.2576	10.5638	10.3256	10.7228	10.2492	10.018	10.3663	11.8896	12.6708	11.3809	10.9345	10.1217	10.3641	10.8557	11.2015	10.835	12.3575	12.2002	11.2085	10.409	12.0029	10.1163	11.5156	11.1207	11.4381	9.46911	9.56714	8.49818	9.65507	10.1731	11.0237	9.59167	9.44362	9.93122	9.9657	10.4704	10.5197	10.8983	11.0593	10.8831	10.7937	11.1838	10.9054	10.3015	10.1081
LOS2	AT2G36530	AT2G36530	10.5995	10.8747	11.7353	10.6158	10.7369	11.0673	11.138	11.4872	11.0184	11.6651	11.2686	11.6156	11.1121	11.0235	11.3005	11.4469	11.4264	11.6018	11.8491	11.8959	11.6832	10.9642	11.557	10.8587	11.69	12.4503	11.7192	11.1877	10.9067	10.7964	11.5105	11.5961	10.838	10.9516	11.0954	11.2189	10.8555	11.4094	11.4498	11.005	11.0187	11.0896	11.1724	11.223	11.97	11.4152	11.3961
GAE6	AT3G23820	AT3G23820	11.2807	11.4062	11.0491	7.75196	8.00682	8.84484	9.65531	9.2393	10.8041	11.8757	12.3692	11.725	9.57032	10.3296	10.4076	11.4281	11.5093	10.784	12.1008	12.1914	11.7324	9.82465	11.7989	9.28777	11.8468	10.7996	11.1581	11.7249	11.5125	9.85597	6.98599	7.86365	6.17796	11.5226	11.5223	10.8158	11.1458	10.8804	11.0437	10.065	9.51405	9.60257	10.9459	10.7966	10.202	10.816	10.7592
AT3G16080	AT3G16080	AT3G16080	10.343	10.6137	11.8081	9.78549	10.2627	9.19188	11.0847	10.9771	10.3445	11.2254	10.3309	10.8561	10.7628	10.8651	10.7756	11.822	10.8347	11.842	11.4897	11.5376	11.3728	10.3056	11.0768	10.0646	11.1167	11.3963	11.9893	10.2061	9.57531	10.1034	9.79378	10.5822	9.27523	9.61425	9.85845	10.1041	9.70605	11.0739	10.6224	10.7206	9.88912	10.3227	10.5852	10.6337	11.7897	10.8348	11.1063
RPL27	AT5G40950	AT5G40950	11.508	11.8621	12.5337	9.68851	9.90144	9.45493	10.2808	9.6528	10.8915	12.2333	11.8422	12.2285	10.4614	10.8491	10.6225	10.7702	10.757	10.6508	12.0648	11.6377	11.7966	10.1312	10.8939	10.0568	10.8452	9.75964	11.1557	11.1329	11.086	11.0907	9.41676	9.85733	7.94357	11.0568	11.0987	10.725	11.1961	11.885	11.9432	11.217	10.1875	10.6257	10.572	10.8847	10.8452	11.9911	12.074
CP29	AT3G53460	AT3G53460	9.25685	9.61636	11.9073	8.50927	8.81364	7.3868	10.5606	10.022	9.18006	10.621	9.53814	10.4567	10.4397	11.4915	11.4155	11.3347	9.99945	11.4787	10.6813	10.27	10.8146	10.9417	11.6569	10.5006	9.6776	9.66909	11.8771	8.73537	8.7408	9.40288	9.32019	9.56818	10.3194	8.99188	8.64801	7.75218	8.77155	10.8915	10.3659	11.1341	9.7998	10.7738	10.3779	10.4778	11.8767	10.9544	10.688
FUM2	AT5G50950	AT5G50950	9.14766	9.77885	7.83571	8.336	8.25008	7.9426	7.38709	6.41098	8.39676	11.6275	12.3634	10.7569	9.48287	9.11263	6.89183	9.18334	9.46314	8.54303	11.7827	11.9766	11.3496	8.08537	9.29377	7.72116	10.365	8.98381	7.65752	11.7089	11.7105	11.3649	8.12672	8.36644	6.3836	11.4744	11.4808	11.543	11.6343	10.7328	10.3807	8.61135	9.25558	8.29721	8.8691	9.27056	7.69119	11.1785	11.4042
AT2G19730	AT2G19730	AT2G19730	10.1923	10.5147	11.8562	10.405	10.5765	9.82578	11.5021	11.5281	10.3839	11.57	10.7634	11.5257	11.1485	11.1533	11.1445	11.7942	10.9372	11.7898	11.5897	11.4349	11.713	10.7871	11.4124	10.5404	11.0882	11.1817	12.018	10.6441	10.2211	10.6321	10.0229	10.4361	9.35478	10.4082	10.4624	10.6643	10.3148	11.4063	11.1712	11.217	10.4682	11.0182	10.8026	10.9037	11.8828	11.4612	11.4872
GBSS1	AT1G32900	AT1G32900	12.5843	12.4125	11.6096	7.2556	7.76507	9.11526	9.31052	8.2953	10.6575	11.1816	11.9788	10.8561	8.02495	8.55757	8.27225	9.4217	9.23585	9.1878	12.005	12.5553	10.8819	8.64215	11.2184	7.98293	10.2335	10.0033	10.0283	11.5832	10.5081	10.6984	8.03548	9.56252	6.21433	10.9365	10.9156	11.3043	11.5613	10.4466	10.7829	10.1891	9.84813	9.72389	10.7231	10.5744	10.2168	10.593	10.8617
PSB29	AT2G20890	AT2G20890	11.4333	11.6278	11.9647	9.10548	9.62588	9.07805	9.79808	9.37532	10.4429	11.9527	11.8901	11.7714	9.73078	10.2539	9.7675	10.171	10.1686	9.94837	11.7167	11.5362	11.4266	9.56662	10.1854	9.52453	10.41	9.17032	10.401	11.22	11.4397	10.9968	9.22359	9.50465	8.60188	11.3717	11.3512	11.1703	11.7122	12.0642	11.9645	10.9516	10.1143	10.4954	10.5537	10.9317	10.5848	12.1447	12.2431
GDCH	AT2G35370	AT2G35370	12.2801	12.0003	11.9859	9.47976	9.73867	9.61932	10.6133	9.71518	11.0407	12.0594	12.0662	11.9285	10.5577	11.2804	10.7746	11.0599	10.8704	10.8494	11.7167	11.5631	11.4683	10.6419	11.4679	10.5557	11.2277	10.1027	11.0003	11.6029	11.6336	11.4288	8.62618	9.32461	7.79537	11.6094	11.714	11.774	11.8333	11.7162	12.013	11.6541	10.8721	11.1556	11.3199	11.3101	11.197	12.1625	12.4696
AT3G05560	AT3G05560	AT3G05560	10.5778	10.8533	12.0526	10.1625	10.5182	9.50784	10.939	10.941	10.2388	11.7725	10.9565	11.5369	10.8174	10.9354	10.6511	11.6583	10.798	11.7163	11.8215	11.6438	11.7443	10.5027	11.1856	10.2424	11.1136	11.3749	11.8947	10.6752	10.1275	10.4044	10.1112	10.5869	10.4202	10.0825	10.4245	10.5009	10.6199	11.5895	11.3045	10.9744	10.469	10.6698	10.7369	10.8634	11.7422	11.4996	11.7528
rpl16 ATCG00790	ATCG00790	ATCG00790	11.7085	12.334	12.8308	9.30676	9.45384	9.60818	10.171	10.3301	11.3943	12.1243	11.8339	12.6401	10.0993	10.4204	10.7621	11.3157	10.6776	11.0618	11.7548	11.4692	11.5114	9.98185	10.9878	9.6546	10.2033	9.85103	10.6237	10.5043	11.4802	10.7512	9.07496	9.9088	9.5201	11.3634	10.3026	10.4602	10.177	11.1498	11.1591	10.0909	9.4052	9.44976	9.12856	10.1452	9.46616	10.625	10.8558
AT5G44580	AT5G44580	AT5G44580	12.2397	11.7834	11.3709	11.801	11.8976	12.6994	11.6288	11.9046	11.8831	11.3364	11.9291	11.1394	12.3506	11.8741	11.6634	10.8477	11.3603	10.6514	10.8093	10.6504	10.6262	11.9596	10.7314	12.102	11.165	10.8282	9.71714	10.7348	10.8103	11.0967	10.3253	10.7943	7.50363	10.4868	10.9113	10.5034	12.1472	11.3516	11.1091	12.2701	12.5512	12.1103	12.0739	12.0447	10.929	10.4931	11.274
GSTU19	AT1G78380	AT1G78380	10.9289	10.6598	11.2137	12.7605	13.0436	13.1907	11.3285	11.4829	12.0176	11.3816	11.3323	11.3371	12.3127	10.5722	11.2356	10.5753	11.7731	10.2707	11.1797	10.9923	11.3736	11.1134	10.6336	11.9189	11.3218	11.9813	10.5586	11.2438	11.428	11.3331	11.9281	12.8308	13.9289	11.3642	11.4489	11.5866	11.1908	11.1885	11.6669	11.2687	12.5214	11.5964	11.3885	11.5513	10.784	11.2624	11.4209
STR16	AT5G66040	AT5G66040	12.4549	11.3777	10.3731	10.7465	11.1228	10.0399	10.134	9.35038	9.98315	11.0971	12.0533	10.4549	10.364	10.3464	10.2282	10.2654	9.80782	9.78115	10.5944	11.0299	10.9757	9.94143	10.1405	9.76193	10.432	9.39882	9.21443	12.4591	11.3835	12.4193	10.6769	10.6647	8.17343	10.7911	11.942	12.4887	11.3243	10.1309	10.7816	10.1088	9.93347	9.79552	9.76121	9.49579	9.44344	9.52483	10.4943
CDSP32	AT1G76080	AT1G76080	11.942	11.8714	11.5996	10.6468	10.9763	10.7835	10.5848	10.4785	11.0345	11.9483	11.9712	11.7132	10.3883	10.7664	10.1756	10.0521	10.9461	9.62197	11.6849	11.956	11.4122	10.6617	10.2475	10.9949	10.9213	9.93988	9.74381	12.1705	11.8856	11.5435	10.7694	10.3066	8.03792	11.8732	12.0917	11.41	11.6209	11.7274	11.7557	10.668	10.5603	10.5027	10.3938	10.8773	9.96043	12.018	12.0757
RPL15	AT3G25920	AT3G25920	11.0189	11.4693	12.4952	7.43073	8.15764	7.42116	9.87518	9.31215	10.3142	11.9327	11.3192	11.8906	9.4908	10.3524	10.3928	10.6333	9.85618	10.4445	11.5855	11.1153	11.3935	9.85932	10.7266	9.66235	9.61982	8.66332	11.0838	9.82213	10.6229	9.668	7.63036	8.09562	7.3649	10.5922	10.2969	9.8042	10.759	11.7743	11.7976	11.0963	9.71635	10.6896	10.1489	10.7303	10.9054	12	12.0372
AT5G02870	AT5G02870	AT5G02870	10.3021	10.6731	11.6799	9.52961	9.68337	9.01759	10.5459	10.6169	9.94414	11.4394	10.683	11.2975	10.3525	10.5826	10.5308	11.5425	10.4694	11.6387	11.5901	11.4465	11.5863	10.0252	10.9081	9.6546	10.746	11.3749	11.8015	10.4196	9.79965	10.2701	10.0109	10.277	10.0417	10.1293	10.1998	10.2375	10.3579	11.5293	11.1469	10.7982	10.0974	10.5927	10.404	10.834	11.8625	11.5455	11.5074
RPL21C	AT1G35680	AT1G35680	10.7145	11.3176	12.477	8.2705	8.71329	8.03424	9.84002	9.22222	9.92556	12.052	11.5141	12.0079	9.7128	10.6798	10.2626	10.3782	9.95721	10.1945	11.7321	11.3802	11.6676	9.98395	10.7659	9.92763	9.79318	8.7208	10.7307	10.2101	10.8179	10.0543	8.14866	8.64167	6.69808	10.8374	10.4252	10.0808	10.8392	11.8637	11.628	10.9112	9.86935	10.4152	10.1461	10.5665	10.5139	12.0933	12.2226
AT2G18193	AT2G18193	AT2G18193	3.40684	2.65772	2.8198	3.88337	3.53089	4.4693	8.11274	9.64	4.45956	3.14541	3.37247	3.58162	4.48626	3.43996	4.80527	8.34942	4.72296	10.0512	2.24805	3.05284	3.56316	5.44956	4.51927	4.68449	5.56677	12.7657	8.59709	3.49917	3.3262	3.36305	5.02457	3.31409	5.29003	3.43917	2.78088	3.53069	2.82639	3.2956	2.4868	3.88483	4.37148	4.36139	6.05848	3.62626	10.9387	2.45302	2
CAM3	AT3G56800	AT3G56800	11.7269	11.3012	11.3038	11.6627	11.7479	12.6396	11.179	10.8758	11.6541	12.5552	12.9262	12.1756	12.1581	11.3211	10.9375	10.9901	12.3485	10.8097	12.2303	12.2396	12.0515	11.447	11.6648	11.6852	12.1222	11.3376	10.9807	11.6459	11.397	11.4377	11.0486	11.077	9.96109	11.1079	11.363	11.3984	11.0411	10.8619	11.0042	11.1524	11.8357	11.1392	11.232	11.1594	9.99284	10.6979	10.8449
AT4G14320	AT4G14320	AT4G14320	10.4215	10.509	11.7593	10.0523	10.386	9.40859	11.398	11.3453	10.0111	11.5351	10.7564	11.4942	10.4841	10.6906	10.4263	11.4837	10.5637	11.8162	11.3619	11.2972	11.4623	10.2509	10.6921	10.0548	10.8159	11.3973	11.8202	10.7875	10.4506	10.8751	10.2031	10.3878	9.30506	10.4202	10.5822	10.9158	10.3588	11.3588	11.0666	10.8452	10.2687	10.4484	10.6228	10.6172	11.9942	11.4117	11.3625
AT1G18540	AT1G18540	AT1G18540	9.97512	10.1746	11.503	9.39393	9.93246	8.97196	10.6828	10.8747	9.77955	11.4619	10.4646	11.3346	10.5464	10.7527	10.5382	11.5282	10.4601	11.7628	11.5247	11.3898	11.5544	10.3743	10.933	9.96572	10.7688	11.3949	11.9267	10.6197	10.0239	10.5245	10.0229	10.3235	10.8056	10.1526	10.3391	10.608	10.2558	11.2236	10.9461	10.6332	9.97758	10.3805	10.3267	10.6005	11.8775	11.438	11.3197
AT3G60770	AT3G60770	AT3G60770	10.7003	10.7888	11.8498	10.6436	10.804	10.0316	11.0871	11.1729	10.6051	11.4853	10.8346	11.3449	11.1233	10.9394	10.9141	11.5962	10.9099	11.7748	11.7148	11.671	11.6009	10.7245	11.1939	10.399	11.2107	11.5066	11.934	10.5306	10.0983	10.5558	10.3043	10.6952	10.2727	10.2378	10.4131	10.4611	10.2936	11.4098	11.2084	10.9432	10.5515	10.8446	10.7719	11.0281	11.9091	11.3	11.3954
GTR1	AT3G47960	AT3G47960	10.6448	10.423	9.25268	8.30362	8.59137	8.27869	8.34408	7.8907	8.94208	12.6077	13.2474	12.1158	10.0009	9.44031	9.06311	11.1472	10.5637	10.534	10.73	11.0373	9.61551	9.94789	10.2528	9.25054	9.95379	9.82924	9.14275	10.1495	10.307	10.5678	10.0561	9.48284	9.6847	10.0309	10.0308	9.65442	9.73514	9.11918	9.06005	8.82517	8.70362	8.60016	8.65103	8.93342	8.14466	8.87289	9.15869
RPL18	AT3G05590	AT3G05590	10.5684	10.8131	11.975	9.7287	9.96283	9.1819	10.5943	10.7717	9.9415	11.6673	10.8945	11.6266	10.6326	10.8965	10.787	11.5845	10.5283	11.6814	11.6852	11.6161	11.7466	10.5041	11.1236	10.1571	10.7501	11.169	11.7568	10.8904	10.5468	10.8116	10.4395	10.5425	10.3946	10.4543	10.628	10.907	10.6284	11.7492	11.3375	10.9959	10.5063	10.7928	10.6449	10.7887	11.8391	11.6526	11.7147
AT3G19030	AT3G19030	AT3G19030	12.6143	11.6744	10.1999	11.3582	11.6946	10.9099	10.5868	10.4197	10.0186	11.5792	12.8236	11.2432	11.4121	10.4866	9.8308	9.89717	9.89991	10.9104	11.0304	11.7122	10.8542	9.60798	10.4846	10.0069	9.98043	10.5536	9.40697	12.3173	12.2224	11.4041	9.71511	10.1418	10.1301	11.4044	11.8181	10.8712	10.668	10.4888	10.3258	9.5607	10.0382	9.14347	10.065	9.63611	9.49697	9.83328	10.3578
RPS10B	AT5G41520	AT5G41520	10.9326	11.0524	12.1494	10.5327	10.7794	9.94864	11.4334	11.3703	10.535	11.784	11.1713	11.7102	11.107	11.1288	11.2499	11.7083	11.0195	11.7873	11.7757	11.73	11.8492	10.753	11.4531	10.6274	11.3035	11.3566	11.9657	11.2067	10.7908	11.2154	10.5833	10.9869	10.0693	10.6259	10.9059	11.32	10.634	11.583	11.3181	11.1062	10.6872	10.9284	10.8667	10.9602	11.7539	11.4567	11.5371
AT2G21580	AT2G21580	AT2G21580	10.7272	10.8288	11.921	10.0596	10.5404	9.58942	11.3049	11.3366	10.3682	11.4902	10.7323	11.2873	10.9071	11.0044	10.8691	11.7172	10.9844	11.8766	11.6244	11.6085	11.64	10.5012	11.1925	10.2798	11.182	11.4428	11.9945	11.0895	10.477	11.3892	10.7324	11.6416	10.7038	10.5297	10.8168	11.6958	10.112	11.2719	10.9195	10.8901	10.296	10.5282	10.7098	10.7836	11.7176	11.0688	11.3139
GLDP2	AT2G26080	AT2G26080	12.0991	12.1298	11.5391	9.06258	9.21786	9.47551	10.1954	8.95906	10.6364	11.0995	11.4658	10.7804	9.84865	10.2376	9.91424	10.0259	10.4486	10.0102	10.5204	10.602	10.248	9.89317	10.1205	10.1088	10.4429	9.45274	9.65385	12.1005	11.7644	11.9255	9.8417	10.2061	8.66894	11.8802	11.9063	11.7809	11.9736	11.758	11.7228	10.5486	10.6786	10.4848	11.0539	11.0477	10.5639	11.7894	11.8194
GRP23 AT2G32690	AT2G32690	AT2G32690	11.5129	11.8226	12.3519	6.89173	6.98672	9.2881	7.90013	8.45003	10.4279	12.5338	11.3198	12.279	8.93461	9.29365	9.95147	10.3893	10.457	9.49801	11.5581	10.7889	12.1837	8.70958	10.3032	8.60923	10.7406	8.99317	10.3165	10.2336	11.5794	9.07781	6.28963	6.0321	5.2202	10.6971	10.9765	10.083	10.8537	11.1649	10.9008	9.86619	9.4052	9.57903	8.85079	10.4918	8.30453	11.3172	11.2472
AT4G35750	AT4G35750	AT4G35750	10.6493	9.08298	7.59812	11.5325	11.5512	13.4352	12.6411	12.7592	10.8357	7.43029	8.16955	7.89392	10.7866	10.4333	9.76332	8.93282	9.36404	9.21759	8.00918	7.89207	8.21932	11.4069	8.89198	12.2131	9.95962	10.0399	7.95406	9.03462	9.56222	10.4328	11.5543	11.1656	11.4316	9.53362	9.64469	9.47029	8.47189	7.11445	7.50295	10.2311	10.5819	10.2757	9.66364	7.90177	8.30453	7.66682	7.38417
GSTF10	AT2G30870	AT2G30870	9.74181	9.62905	9.42744	10.2981	10.7622	10.4	9.46145	9.76557	10.215	11.6158	12.1056	11.2985	10.947	9.94037	10.1293	10.3597	10.9439	10.013	12.0504	12.3853	11.341	11.0265	11.8354	10.4327	12.0622	11.6401	10.7006	9.90754	10.5534	10.1981	10.1497	11.57	10.8867	10.0393	10.0947	11.2893	10.2475	9.38551	9.91048	10.4513	10.9215	10.2926	10.6402	10.4027	9.36614	9.56332	9.71555
AT5G10760	AT5G10760	AT5G10760	9.07883	9.14905	6.98214	10.0327	10.2015	11.3238	10.2115	9.07015	10.7002	7.63769	8.09883	6.06376	12.5152	10.6457	10.7033	8.30314	11.7174	8.54565	6.35828	6.9912	7.20071	11.8541	8.38692	11.5861	11.6371	10.875	7.49954	6.20603	5.77667	8.35509	9.70033	9.95274	5.14682	5.80038	5.72346	4.73719	8.58079	7.89174	7.34097	10.3189	12.298	11.4439	11.792	11.2599	9.46509	4.33855	5.10164
JAZ1	AT1G19180	AT1G19180	8.79755	8.8023	6.04947	8.84922	8.91313	10.9413	8.18684	8.27556	7.64545	12.3842	13.1675	11.9177	10.6218	7.99323	9.22082	10.268	10.9357	10.5195	10.8087	10.9045	10.115	9.2967	9.85326	9.25397	9.72769	10.7803	9.39804	8.55092	9.75432	6.8506	8.14138	8.29085	11.0237	9.23892	7.77778	7.7409	8.4999	7.72815	6.28255	6.78512	8.47345	7.63432	6.9211	6.79622	7.46487	7.8254	7.32853
AT5G46430	AT5G46430	AT5G46430	10.9387	10.9676	11.7383	10.3486	10.7046	9.64135	11.5863	11.7174	10.4335	11.2756	10.5879	11.3321	10.809	10.8986	11.03	11.6474	10.5598	11.915	11.1997	11.37	11.2298	10.7295	11.1465	10.5178	10.6389	11.8709	11.7581	10.8421	10.4753	10.9602	10.2994	10.3089	9.73565	10.421	10.7002	11.0406	10.2838	11.1288	10.7816	10.8575	10.0548	10.7182	10.3827	10.3937	11.9496	11.0448	11.022
CWLP	AT3G22120	AT3G22120	10.5092	11.1993	11.6995	5.03062	4.63146	6.68401	8.46813	10.3523	9.99846	10.9315	9.2451	11.6466	7.56563	9.80104	10.0179	9.9846	9.02637	9.78225	11.9321	10.3873	11.5823	10.0987	11.1571	9.79286	8.47252	8.53845	11.7421	6.20603	9.71937	6.57957	4.95987	4.31146	5.89387	9.51574	7.74917	7.4605	10.3016	11.8098	10.9689	10.9557	10.1133	10.9922	9.8165	11.042	9.11402	11.682	11.2644
RPL34	AT1G69620	AT1G69620	10.7797	10.9642	11.9776	10.6692	10.8252	10.1592	11.2576	11.4377	10.9346	11.6075	11.0668	11.5843	11.4768	11.4977	11.4698	11.749	11.2348	11.8706	11.5552	11.4848	11.5367	11.2881	11.6068	11.0658	11.2851	11.3767	11.9091	10.7914	10.6276	10.7707	10.1802	10.7584	9.84118	10.5901	10.6732	10.8398	10.737	11.6397	11.4696	11.4253	10.945	11.4137	11.2133	11.3309	11.8922	11.5319	11.706
PGY2	AT1G33140	AT1G33140	10.9934	11.1488	12.0695	10.9301	11.1253	10.4425	11.2481	11.2808	10.8041	11.4401	10.9348	11.4772	11.4438	11.4103	11.4933	11.6271	11.0926	11.8583	11.6217	11.6154	11.7137	11.1989	11.7097	10.813	11.4028	11.6588	12.0609	11.2091	10.587	11.5278	11.0021	11.3296	11.6457	10.6771	10.8654	11.3388	10.1761	11.0947	11.047	11.1902	10.6591	11.0936	10.6482	10.7467	11.9511	11.0448	10.8937
CAX1	AT2G38170	AT2G38170	10.9544	10.9626	9.64527	11.4882	11.5209	11.0578	11.3767	10.3663	10.3643	10.2057	11.4363	9.63646	11.5981	10.9161	9.68813	10.5774	10.1622	10.5678	11.959	12.6147	11.5608	10.2299	11.517	10.1735	11.3664	11.0426	10.1497	11.5223	10.1006	11.6172	10.8785	10.5492	7.87706	10.286	10.7796	9.64234	11.0262	10.7663	11.2327	11.1714	10.5776	10.6515	10.9093	10.5208	11.2918	9.26941	9.70248
CCH	AT3G56240	AT3G56240	10.5778	9.90415	9.12669	10.5275	10.6496	11.7383	9.94624	9.72491	9.54589	9.93446	11.5924	8.97611	10.5438	10.127	9.65692	8.62947	9.73036	8.75647	9.45814	10.2892	8.99201	10.1179	9.78752	10.419	10.508	10.2396	7.5528	12.2124	11.2849	11.8756	10.5766	10.9869	9.52373	11.6867	12.4168	12.0105	10.7304	8.65324	9.17069	9.54553	9.73317	10.0256	8.80398	8.2138	8.17651	9.47484	9.82414
AT1G15930	AT1G15930	AT1G15930	10.4146	10.7174	11.7854	10.4296	10.8461	9.76689	11.0469	10.9781	10.308	11.0082	10.4428	11.0065	11.3904	11.1611	11.388	11.3433	10.6208	11.6074	11.0912	10.9512	11.1703	10.7283	11.2817	10.4052	10.7474	10.979	11.7836	10.2616	9.77149	10.4468	9.97454	10.823	9.47584	9.80667	10.0456	10.377	10.2429	11.2389	10.9781	11.4045	10.8113	11.3751	10.8425	10.9178	12.1554	11.167	11.2314
PIP2B	AT2G37170	AT2G37170	10.908	10.6191	9.67977	13.225	13.5199	12.5885	12.0734	11.6072	10.5068	10.2452	11.1357	9.76833	10.408	10.4131	9.41987	11.2596	10.6577	11.1778	10.5618	10.2198	11.051	10.3791	10.56	10.3567	11.0072	10.5409	10.5251	9.61815	9.92126	10.5489	10.1534	9.72168	6.59149	9.55858	10.0407	8.94943	10.9555	10.9856	11.0497	11.2043	11.7888	10.6592	11.759	10.4101	11.1866	9.9379	9.9947
AT1G05340	AT1G05340	AT1G05340	6.59227	5.4735	4.7249	11.188	11.3435	12.5628	9.10228	11.0222	9.70993	6.72541	7.33855	5.67094	9.08544	7.18152	7.64904	6.26334	6.71206	7.35905	5.5476	5.85126	5.26333	8.10091	5.56777	9.69042	5.00579	9.38608	6.03956	5.53043	5.01906	8.09083	11.3004	9.98837	14.2267	4.32015	4.75392	7.33857	4.22433	5.17014	4.81148	6.32418	6.9445	7.55526	4.9323	5.08387	5.93968	3.41147	3.17887
AT2G43030	AT2G43030	AT2G43030	11.2419	11.523	12.344	8.70791	8.94113	8.22135	10.2186	9.70045	10.3858	12.2513	11.7547	12.0383	9.91305	11.0822	10.7891	11.0986	10.5204	10.9365	11.9736	11.6732	11.7668	10.3338	11.376	10.1238	10.3755	9.43086	11.3119	10.7057	10.9507	10.2426	8.87015	9.2976	7.98627	10.9128	10.6965	10.1008	10.8906	11.6961	11.4785	11.0145	9.95017	10.5288	10.4745	10.7344	10.6425	11.9082	11.8464
AT1G52220	AT1G52220	AT1G52220	11.3699	11.6135	11.6866	9.4206	9.6566	9.42561	9.77905	9.14094	10.6494	12.2481	12.3698	12.1341	10.2283	10.8534	10.2098	10.354	10.5744	9.91139	12.0613	11.7937	11.9607	9.98813	10.8104	9.97198	10.8966	9.47027	10.1556	11.2876	11.8362	10.8317	8.67234	8.90886	7.01916	11.5785	11.467	10.9885	11.3151	11.2288	11.3504	10.8006	9.92561	10.1535	10.0156	10.3351	9.46401	11.4571	11.6751
rps18	ATCG00650	ATCG00650	11.7726	12.0921	12.8332	8.39097	9.24057	9.35628	9.95157	9.82108	10.2323	12.3346	12.0633	11.8224	9.82165	10.4546	10.2715	10.5508	10.4528	10.7656	11.814	11.5212	11.4262	10.0109	10.5842	9.45481	10.6461	9.68766	10.6256	11.2342	11.7098	11.6155	8.67738	10.0664	9.78787	11.2018	10.7936	10.7328	9.96904	10.0843	10.3168	9.38279	8.56881	8.87706	9.48968	9.55437	8.82849	10.6074	10.5501
ACR11	AT1G16880	AT1G16880	11.9256	11.959	11.8406	10.5569	10.5495	10.1516	10.6233	10.0819	11.1338	11.9932	12.3252	11.7663	10.7628	10.9889	10.405	10.3262	10.7822	10.0794	11.6829	11.7532	11.4064	10.4746	10.454	10.6314	10.7925	9.66909	10.1376	11.4803	11.6919	11.237	10.1731	9.77976	7.58922	11.6206	11.6676	10.8016	11.9314	11.9211	12.1456	11.1875	10.6427	10.842	10.7092	11	10.4398	11.9267	12.0643
AT1G52720	AT1G52720	AT1G52720	6.9985	7.46986	7.65034	9.36676	9.19943	9.82257	7.69197	8.51319	8.58437	11.9129	13.006	11.7523	9.03569	7.73007	7.85951	8.99237	10.2589	8.95813	11.7028	11.8293	11.0626	9.3168	10.1519	8.78995	10.8552	9.81875	9.41253	7.49982	8.45589	7.38041	8.10445	8.12152	8.42694	8.38767	7.62345	8.50198	7.66887	6.85821	6.85264	7.87362	7.63716	7.6295	7.31753	6.73158	6.08101	6.83205	6.81638
DFR	AT5G42800	AT5G42800	2.86851	3.28923	2.32775	7.38503	7.09038	3.00604	2.62954	5.45403	2.5361	2.68351	2.61326	3.58162	6.12434	4.61809	4.86891	3.19356	3.01335	2.41998	2.24805	2.6204	4.85917	5.75468	4.9928	6.93904	4.00497	2.99186	6.07361	2.85751	4.08072	6.55221	13.054	13.1282	10.8293	10.396	7.5424	10.1707	2	2.24104	2	7.05819	3.62638	5.18773	2.63485	2	4.58519	2.79727	2.39616
ROC5	AT4G34870	AT4G34870	10.8652	11.0005	11.6366	11.005	11.3807	10.6667	11.2916	11.5329	11.1245	11.545	11.2322	11.5583	11.2556	11.0684	10.8894	11.5714	11.471	11.7368	11.7391	11.8644	11.6548	10.9035	11.7225	11.0726	11.7383	11.6009	11.7938	11.5083	11.2034	11.3376	11.6081	11.776	11.4287	11.2041	11.496	11.856	11.3823	11.5057	11.5106	11.507	11.2267	11.2944	12.0295	11.3949	11.9726	11.6459	11.6464
AT3G56290	AT3G56290	AT3G56290	13.3792	12.928	12.3386	12.4626	12.8847	12.1618	12.1	11.1782	11.7241	10.8343	11.5487	9.92114	10.6574	10.032	9.58767	9.95177	10.4643	10.1609	10.2424	10.8287	10.1201	10.3934	10.1161	10.7742	10.6612	10.03	9.96927	11.9381	10.9681	11.4819	10.499	10.8665	9.1634	11.0778	11.3677	11.4697	11.2993	10.7408	11.472	10.2482	10.3465	9.80836	10.7701	10.771	10.7624	10.4872	11.2555
AT5G57290	AT5G57290	AT5G57290	10.6844	10.6275	12.0725	10.4537	11.1459	10.0646	11.3087	11.4678	10.3974	11.975	11.0475	11.5901	11.1527	11.0903	10.8826	11.6487	11.0244	11.8173	11.7533	11.727	11.7883	10.5782	11.3826	10.6208	11.4122	11.6754	12.0245	10.8415	10.3274	10.6116	10.5562	10.865	10.3747	10.2612	10.6136	10.8576	9.74557	10.8259	10.5362	10.6397	10.0403	10.2726	10.2597	10.2429	11.1666	10.7692	11.1187
PRXCB	AT3G49120	AT3G49120	8.34164	8.18231	8.58698	12.5354	12.6238	12.7905	10.2892	11.215	9.95726	9.94514	10.0181	9.99312	11.772	10.1977	10.6578	10.145	10.0926	9.95133	10.1086	9.88471	10.0018	11.7636	9.71673	12.9046	10.8159	11.1883	10.3236	7.4737	8.2468	8.12837	12.4063	11.369	13.1901	8.44548	7.97186	8.60201	9.57323	9.00739	9.42769	10.3683	12.2552	11.8253	10.0329	9.90465	9.91631	8.49035	8.67411
rps2	ATCG00160	ATCG00160	11.3957	11.8161	11.9406	9.16527	9.13785	9.7999	10.2543	9.91762	10.7614	12.2113	11.7342	12.0129	10.0836	10.4921	10.7087	11.7108	10.6476	11.2074	11.8744	12.0041	11.7995	10.1083	11.5644	10.037	10.587	10.3689	11.2987	10.9033	11.5684	11.3088	9.2909	10.1988	10.0817	11.5352	10.5815	11.1075	9.87357	10.1467	10.1566	10.0475	9.53781	9.79444	9.848	9.9347	9.33707	10.6655	9.95483
PDX1.1	AT2G38230	AT2G38230	12.8939	12.4826	11.9145	9.55734	10.0783	10.0427	11.4057	10.0571	11.107	11.663	12.0058	11.2123	10.1702	10.5193	9.72943	10.7062	10.3484	11.0549	11.0642	11.3813	10.8956	10.3222	10.2422	10.1897	10.4775	9.82296	10.3141	12.1575	11.5622	11.6164	9.33621	9.31791	7.38099	11.7248	11.9601	11.2874	11.5675	11.1222	11.6188	10.5136	10.4651	10.0338	10.718	10.6834	11.2041	11.1886	11.609
SIB1	AT3G56710	AT3G56710	9.88728	9.24556	8.6396	8.96244	9.17605	11.3362	9.7091	9.68557	10.8414	8.3452	7.52436	8.49577	10.4246	8.87221	10.2949	8.79867	10.3939	9.01577	7.32268	7.41114	8.54343	9.67179	7.56967	9.09883	8.91345	12.7908	8.20504	7.79177	9.1036	6.21099	7.92965	8.11122	10.6925	8.21744	8.12073	6.06554	9.61224	8.99921	7.92598	7.76826	9.77876	9.01641	10.064	10.7531	8.7138	6.59938	7.16026
AT4G31985	AT4G31985	AT4G31985	10.9663	10.9923	12.17	10.8012	11.159	10.2788	11.3504	11.3429	10.7219	11.9367	11.1686	11.8747	11.2618	11.3578	11.1169	11.7394	11.0777	11.8214	11.7895	11.6217	11.8887	10.8979	11.3287	10.8269	11.3838	11.6185	11.9069	11.0128	10.5853	10.977	10.6152	11.0141	10.568	10.3968	10.7995	10.9082	10.1895	11.2376	10.9538	11.0623	10.5161	10.6756	10.6673	10.6637	11.6228	11.3506	11.7088
AT2G43460	AT2G43460	AT2G43460	10.8092	10.9923	12.0609	10.2135	10.6513	9.64862	10.9937	11.0369	10.4996	11.8139	11.1877	11.7681	11.0174	11.1385	10.9885	11.6788	10.8217	11.8388	11.6931	11.548	11.7211	10.4821	11.3299	10.3179	11.0716	11.4322	11.945	10.8923	10.6054	10.6516	10.1461	10.7642	10.029	10.4457	10.6965	10.6501	10.0407	10.9302	10.692	10.7807	9.98409	10.3456	10.1977	10.2626	11.5802	11.0683	11.2092
RAN-1	AT5G20010	AT5G20010	11.0686	11.101	10.8522	10.5535	10.6496	11.2215	10.8922	11.2816	12.1803	11.525	11.8276	11.2193	10.7671	10.1876	10.3107	10.6935	12.1256	11.3739	11.0631	11.2918	11.0467	10.5628	10.4597	10.8932	11.5508	11.1139	10.5878	10.7252	10.5958	10.6272	10.6007	10.8143	10.7921	10.6984	10.7701	10.7901	10.6396	10.8363	10.6047	10.106	10.3781	10.2477	12.8832	11.4042	10.7354	10.4374	10.7056
AT5G45775	AT5G45775	AT5G45775	9.79105	10.0991	11.3234	9.43188	9.86097	8.82573	11.2632	11.0821	9.83463	10.7114	9.93779	10.6368	10.4219	10.6726	10.5768	11.4484	10.5133	11.6665	10.9755	11.0684	10.9879	10.2785	10.8579	9.93831	10.7853	11.2093	11.7467	9.97427	9.11709	9.74555	9.75379	10.2134	9.21816	9.3691	9.68049	9.86262	9.76749	10.9264	10.4099	10.9096	10.1123	10.6136	10.5949	10.5418	11.9736	10.7934	10.8169
AT5G62300	AT5G62300	AT5G62300	10.7891	11.011	12.0338	10.7465	10.8342	10.0288	11.4042	11.3703	10.6364	11.5059	10.8127	11.4483	11.1309	11.2954	11.2454	11.7813	11.0634	11.8992	11.4901	11.5376	11.5771	10.8026	11.3778	10.5777	11.3035	11.5724	12.0292	10.754	10.411	10.8073	10.2764	10.7368	9.61839	10.4154	10.5747	10.7449	10.2235	11.0349	10.8497	10.8631	10.3748	10.6013	10.616	10.635	11.5643	11.1031	10.9757
PFN2	AT4G29350	AT4G29350	12.4646	12.2944	11.9925	12.7319	13.0455	12.5292	11.9056	11.6138	12.0504	12.3151	12.5293	11.7608	12.4851	11.8992	11.8008	11.588	12.2275	11.4241	11.9838	12.0969	11.8973	11.7908	11.6464	11.9739	12.5237	11.6428	11.2806	12.3246	12.1948	12.2018	12.4082	12.7758	12.6385	11.9238	12.2992	12.2858	12.2152	11.9818	12.2914	12.1443	12.1109	11.8521	12.3049	11.8444	11.629	11.6703	12.2846
AT3G06700	AT3G06700	AT3G06700	10.6757	10.8149	12.1328	10.3022	10.784	9.85435	10.7734	11.0013	10.3203	11.872	11.1117	11.7419	10.914	11.0349	10.6109	11.6612	10.9046	11.671	11.7337	11.6735	11.7137	10.3404	11.1856	10.3851	11.1959	11.6772	11.8436	10.7875	10.358	10.8087	10.5286	10.7991	10.2488	10.4401	10.6643	10.7742	10.3765	11.4305	11.28	10.9928	10.5228	10.5627	10.6913	10.8084	11.5104	11.4414	11.5353
AT1G57720	AT1G57720	AT1G57720	10.496	10.5518	11.047	10.4902	10.4301	10.6101	11.709	11.5014	10.83	10.6332	10.2641	10.5986	10.8206	10.546	10.7663	11.4393	10.9304	11.5393	10.6007	10.5602	10.6656	10.5988	10.7678	10.2915	11.0532	11.0992	11.4629	10.2239	10.0824	10.5489	9.84394	10.5396	9.29235	10.0204	10.0641	10.4245	10.3882	11.2479	10.8218	11.123	11.2253	11.1476	11.6009	11.3145	11.8767	11.0733	11.0524
AT3G47650	AT3G47650	AT3G47650	11.3699	11.4342	12.2649	9.43188	9.90713	9.07266	10.677	9.91549	10.4669	12.0254	11.6199	11.8326	10.2841	11.0822	10.5443	10.937	10.6124	10.8776	11.6613	11.386	11.5359	10.3695	11.0238	10.2731	10.5901	9.67609	11.1781	11.0459	10.9008	10.955	9.31696	9.8151	8.29729	10.9968	10.9247	10.59	11.2707	11.8564	11.8259	11.3794	10.4472	10.8483	11.0473	10.9095	11.182	11.9869	12.2107
AT5G56710	AT5G56710	AT5G56710	10.829	11.039	12.109	9.88459	10.2176	9.51978	11.0534	10.9771	10.4298	11.7503	10.8212	11.4959	10.7844	10.8329	10.9723	11.6952	10.8419	11.6065	11.7586	11.7646	11.667	10.5273	11.2477	10.232	11.1157	11.1271	11.8456	10.5503	10.1713	10.5183	9.9456	10.4838	9.79989	10.1085	10.3668	10.551	10.2963	11.478	11.1591	10.9734	10.3707	10.7351	10.6515	10.866	11.4383	11.4058	11.5978
AT1G32470	AT1G32470	AT1G32470	11.7297	11.727	12.1163	8.1842	8.71329	8.01187	9.80633	9.04317	10.6924	11.9407	11.6831	11.9324	9.75952	10.7866	10.1162	10.5337	10.1298	10.2911	11.6162	11.1862	11.344	9.80106	10.8922	9.80692	10.0866	8.93607	10.5981	10.8586	11.2103	10.412	7.58817	7.46294	6.79733	11.0969	11.1778	10.7735	11.4141	11.774	11.7979	11.1773	10.2571	10.7673	10.5608	10.8427	10.5391	12.0359	12.4065
AT1G08360	AT1G08360	AT1G08360	10.3393	10.6169	11.4759	10.4183	10.6665	9.63038	11.2827	11.2808	10.2601	10.9704	10.3649	10.9915	10.8341	11.1182	10.9244	11.4829	10.7578	11.5717	11.0433	10.8439	11.0339	10.9233	11.1704	10.575	10.9643	11.0605	11.5953	10.4517	9.8664	10.7795	10.0209	10.2572	9.09676	10.06	10.1358	10.3734	10.4113	11.362	11.0939	11.4537	10.9785	11.2887	11.2469	10.9718	12.0554	11.326	11.3563
GSR2	AT1G66200	AT1G66200	12.731	12.3334	11.734	12.0725	12.2265	11.9699	11.242	11.3334	11.5287	11.5515	12.2644	11.4126	11.4479	11.3802	10.7228	10.1692	10.9938	10.1472	10.9658	11.0324	11.0924	11.4815	10.5578	11.8905	10.5772	10.0853	9.8775	11.7668	11.4789	11.0686	12.718	11.1712	11.567	11.3967	11.8363	10.377	12.409	11.9214	12.4138	11.5376	11.6954	11.4408	11.1103	11.215	10.6609	11.8811	12.025
emb2394	AT1G05190	AT1G05190	11.7206	11.8647	12.4319	9.08657	9.59095	9.15663	10.9422	10.2277	10.8286	12.1208	11.7892	12.0984	10.1734	10.9889	10.7537	11.3736	10.6476	11.1664	11.8095	11.547	11.7361	10.5416	11.2048	10.3277	10.4058	9.63122	11.3305	10.9143	11.3444	10.7315	8.58387	8.98983	7.44361	11.355	11.0507	10.7307	10.8489	11.556	11.3954	10.7889	9.94906	10.4552	10.5928	10.5784	10.6879	11.8288	11.8294
AT2G23090	AT2G23090	AT2G23090	12.3956	11.9536	11.8562	12.6437	12.8983	12.8786	12.3555	12.2626	11.9358	11.9798	12.17	11.7486	12.316	12.0877	11.7227	11.8141	11.9462	11.6242	11.752	11.9188	11.7397	11.924	11.8016	12.2448	12.218	11.825	11.586	12.3811	11.9935	12.7102	12.3179	12.4182	12.493	11.7978	12.2093	12.4941	11.159	11.0394	11.3549	11.4204	11.4816	11.268	11.549	10.8285	10.9027	10.8925	11.319
BZIP60	AT1G42990	AT1G42990	9.19315	8.60242	8.24765	9.69164	9.57317	10.11	9.35137	9.64769	9.3449	9.00303	8.90593	8.61138	9.89323	8.52573	8.88985	8.88649	9.29787	9.53528	7.50656	7.79768	7.76996	9.17353	7.83187	9.47843	8.39197	12.7865	8.55152	8.43386	8.44524	8.59856	8.90923	8.74858	10.3319	8.11428	8.38527	8.83206	8.64071	8.71947	8.4477	8.44293	9.24118	8.8566	8.79443	9.05728	9.98537	7.62429	7.68817
SVB	AT1G56580	AT1G56580	10.3058	10.3028	11.2	7.66542	8.27669	7.43804	7.17044	9.44176	9.68806	11.7361	11.3162	12.0606	8.4508	9.10546	9.17119	10.7126	10.4113	10.4702	11.6842	11.1836	11.855	8.83565	11.257	8.40874	10.4815	9.56497	11.6195	10.8144	11.2547	9.45921	8.47232	8.27248	8.2455	11.1049	11.1179	11.9286	10.6918	10.9457	10.7617	10.0376	9.11848	9.18181	9.80704	10.1672	9.42477	11.2822	11.0711
IAR3	AT1G51760	AT1G51760	6.73331	6.4648	6.25616	9.98499	9.77956	10.5685	10.1433	10.774	9.02419	11.8202	12.6829	11.4763	10.05	8.48768	8.53512	9.82764	11.0661	10.1558	11.4867	11.4476	10.6161	10.1006	10.5779	9.99876	11.6465	11.7082	10.6474	7.04748	7.34425	6.60642	8.34511	8.84189	9.35478	7.84986	6.9024	6.52614	8.53641	6.73555	7.06644	8.52116	10.2802	9.11273	9.56742	8.96389	9.45863	6.69494	6.767
AT4G33865	AT4G33865	AT4G33865	10.9993	11.0834	12.258	11.0545	11.3529	10.4508	11.5764	11.4481	10.8215	11.7283	11.0539	11.7575	11.3149	11.2867	11.0036	11.8542	11.1239	11.8409	11.5971	11.4237	11.6449	10.7345	11.1048	10.6995	11.309	11.4162	11.9243	10.9946	10.6299	10.9563	10.6881	11.0737	10.0417	10.6575	10.7872	11.0239	10.2775	11.2108	11.0261	10.9563	10.5833	10.5487	10.934	10.6998	11.57	11.4175	11.5972
AT1G29660	AT1G29660	AT1G29660	11.3993	11.7825	11.1975	4.56815	5.09737	6.29684	7.8139	7.06032	10.3484	9.88168	9.59261	9.80451	7.36156	10.4362	10.6746	10.879	10.0613	10.5646	9.29538	8.80097	10.0193	7.95467	9.85673	8.16131	9.2827	7.42147	9.98798	7.69334	9.1976	5.76323	4.19178	3.8973	4.80906	8.46113	8.79288	6.48616	11.281	11.8214	11.7976	11.5429	10.3227	10.8622	11.4616	10.7882	11.158	11.4563	11.7596
CSLA01	AT4G16590	AT4G16590	3.79798	3.95901	3.47787	2.9233	3.27336	4.00905	2.7903	3.27661	3.48553	9.94691	10.2492	9.67761	4.85743	4.14609	2.70533	8.04241	7.29268	6.6336	11.9013	12.4799	11.5344	4.92916	9.85499	5.22091	10.7945	9.86231	10.1668	7.62377	7.55717	5.35178	3.65132	3.79802	3.5103	9.11377	7.30751	7.04033	8.04758	3.3987	5.91138	3.81293	2.81479	2.87005	3.59781	4.86024	5.97633	8.05886	5.51449
TBL26	AT4G01080	AT4G01080	9.09199	9.89367	9.11877	5.18079	5.5687	6.56613	6.70959	5.19857	7.70889	10.8693	11.8905	10.0913	7.70855	7.59342	6.64152	9.47933	9.14273	9.1591	11.823	12.5174	10.9056	8.54895	11.1287	7.35083	11.0999	10.3846	10.37	9.39101	8.63224	7.88142	5.20289	6.0321	5.29003	9.5874	8.84788	7.50786	10.3511	8.55343	9.36233	8.59	7.62056	7.70927	9.33364	8.31181	9.31578	8.8197	9.05279
FLA8	AT2G45470	AT2G45470	10.5206	11.6785	11.6555	4.19717	4.39278	6.4038	6.49302	7.91642	9.69434	11.7097	11.2568	11.4844	7.54546	9.69291	9.74648	10.6656	9.42303	9.52208	11.7187	11.2885	11.7684	8.19801	10.893	8.29365	9.90383	8.34729	10.2659	9.89037	10.3419	8.30679	5.45843	5.57297	4.605	10.1944	9.6627	9.10491	10.4676	11.7109	11.2211	9.77453	8.30363	9.26646	8.78482	9.97615	8.88581	11.9093	11.9936
ACO2 AT1G62380	AT1G62380	AT1G62380	11.0417	11.0579	11.4831	9.91706	10.3064	10.7297	8.8151	10.8337	10.3121	11.0835	10.7626	11.136	9.72406	9.42314	10.9831	9.58258	9.61703	9.28791	11.4601	11.2191	10.8711	10.8789	11.2524	11.5566	9.86954	10.1377	10.4607	8.88904	9.47235	7.26717	10.6731	9.17929	10.3401	9.54835	9.41962	8.32819	11.8293	12.1425	12.4229	11.2069	10.2108	11.4473	10.1995	10.6907	9.93815	11.4011	11.2322
AT5G54170	AT5G54170	AT5G54170	9.02038	8.72169	7.78989	9.50845	9.34487	9.4632	8.50045	8.35293	7.92734	12.1983	13.2209	11.503	9.75952	8.06882	8.26043	9.80409	10.5888	10.2817	10.4633	10.6166	8.77224	9.26602	10.069	9.62051	10.1046	10.7563	9.5265	7.96115	8.4345	7.82537	8.24004	7.70826	8.23669	8.11823	8.10577	7.05862	9.10711	8.13139	8.4477	8.55461	8.96916	8.5878	8.16129	7.73276	8.93163	7.94252	7.80693
PIP1C	AT1G01620	AT1G01620	12.3024	12.4957	12.2774	10.7299	11.0346	9.52769	10.9153	10.5664	11.0033	11.3869	11.3789	11.1331	9.77042	10.6043	10.516	10.405	9.46937	9.78998	10.6614	10.212	11.1251	8.39991	9.46495	8.58223	8.64173	7.60362	9.71714	10.604	11.5733	10.0773	9.2677	8.8072	6.53508	11.0454	11.0802	10.4394	11.4243	12.0073	12.1423	10.4484	9.64701	10.051	9.64649	10.1479	9.93272	11.5106	11.7153
PLAT1	AT4G39730	AT4G39730	9.97512	9.72078	9.51655	10.086	10.4556	9.83855	9.29217	9.03927	9.56659	9.99569	10.424	9.90656	9.98221	9.42889	9.10004	9.37452	9.76961	9.34449	10.3165	10.4552	10.3125	9.08647	10.0645	9.36898	10.5983	9.6384	9.63972	12.1306	11.3965	12.0763	10.6515	11.4798	10.6383	11.1735	11.7133	12.6417	10.501	9.91639	10.483	9.95551	9.91431	9.53593	9.78069	10.0836	9.5945	9.8633	10.3771
JR1	AT3G16470	AT3G16470	7.86769	7.36255	7.43758	5.71172	6.01053	6.71203	8.31463	8.69752	6.43977	10.2042	10.7956	10.2768	8.54016	8.43723	8.19365	9.57842	8.71282	9.26273	12.0163	11.997	12.2192	11.098	11.6358	9.03656	11.0262	10.8638	10.4564	8.6417	8.94874	10.2308	8.19156	8.99824	6.3836	9.00689	8.26244	9.35477	7.9917	6.92882	6.95885	9.18694	8.31742	9.21273	8.30606	6.9257	7.51555	7.8254	7.10834
PEN3 AT1G59870	AT1G59870	AT1G59870	9.69083	9.07063	9.27185	10.4519	10.1448	11.3021	10.0302	9.92819	10.535	11.78	12.3916	11.7378	11.0482	10.429	10.7325	10.2305	11.6422	10.5691	10.3616	10.1944	10.4349	10.9926	9.72624	11.1062	10.8351	12.2992	9.88151	6.55647	8.25495	8.16044	9.73216	10.3268	11.4355	8.04947	6.97832	7.30832	10.4565	9.55552	9.18468	10.1088	11.269	10.8019	10.0471	10.8213	9.89573	8.83843	8.76494
AXS2	AT1G08200	AT1G08200	9.95606	10.2909	10.3428	8.73851	8.8317	9.07805	9.21282	9.04705	9.67223	11.8794	12.6471	11.5608	9.62181	9.83391	9.78823	10.6104	10.7578	10.5504	12.0076	12.0924	11.3261	10.5988	11.6011	9.64419	11.3681	10.8208	10.7693	10.9143	10.9475	9.90816	8.83901	9.0824	7.92174	10.9168	10.6482	10.8898	10.8912	10.8534	10.8256	10.2155	9.7612	9.95801	10.2423	10.4012	9.76567	10.8166	10.9436
psbJ	ATCG00550	ATCG00550	11.4572	11.4264	10.6563	9.85417	9.88999	10.2951	10.064	9.72976	10.5832	11.3525	11.9129	10.9495	10.1702	10.311	10.3405	10.7629	10.7356	10.2045	11.3001	11.4888	11.0981	10.0334	10.6346	9.70301	10.9344	10.2981	10.0391	11.0657	11.1806	11.0418	8.72196	9.90583	8.61555	10.8841	10.9026	10.9915	12.2412	11.7671	11.5552	11.5173	11.1444	11.166	11.5813	11.453	10.9426	11.6018	11.9769
LEA14	AT1G01470	AT1G01470	9.66464	8.68167	8.47148	11.6173	11.532	11.9361	9.58717	10.4567	10.3663	11.2657	12.6908	10.1385	10.9614	9.35533	9.68592	9.86908	10.3906	10.4162	11.0907	11.1755	10.282	9.37226	10.5407	9.99876	10.1954	10.9267	9.82683	10.9784	10.4883	11.5943	10.4674	10.725	11.0441	10.3555	10.7359	12.6819	9.41882	8.73679	8.86523	9.56618	10.8539	9.58028	9.20442	8.89809	9.0567	8.19221	8.67411
KCS6	AT1G68530	AT1G68530	11.8437	11.5796	10.2419	8.65114	9.048	8.8193	9.33842	9.03536	10.3203	9.97672	10.6096	9.84398	9.62421	10.0526	10.3847	10.0818	10.3895	10.1736	10.2353	10.0537	10.3432	9.79868	9.88928	9.58832	10.5017	9.56497	9.93418	11.9387	11.5031	11.6188	10.7905	10.2277	7.56125	11.7222	11.9224	12.2494	11.9728	10.6139	10.8256	11.1104	10.5457	10.2903	10.6201	10.5208	10.6458	9.79664	10.1245
AT5G51110	AT5G51110	AT5G51110	11.2271	11.2596	11.3798	8.915	9.56239	8.48765	10.1095	9.03536	9.87667	11.5809	11.5256	11.2781	9.69689	10.2376	9.72943	10.1756	9.6775	10.1044	11.3598	11.2744	11.07	9.46523	10.0795	9.51028	9.91948	8.67034	10.0739	11.2881	10.9374	11.0589	8.86132	9.18421	7.50363	11.0049	11.0662	10.9245	11.506	11.837	11.8157	11.021	10.1922	10.5608	10.5776	10.8542	10.8402	11.9226	12.0858
AT5G47210	AT5G47210	AT5G47210	10.5887	10.8623	11.6408	9.71337	9.67339	9.50784	10.6609	10.8007	10.1225	11.6753	10.9847	11.4781	10.5272	10.8872	10.6758	11.5123	10.6531	11.538	11.6677	11.6483	11.6676	10.5586	10.9289	10.2233	10.7188	11.2951	11.7048	11.0308	10.5259	11.0107	10.5671	10.3674	10.5125	10.7233	10.8282	10.9214	10.6605	11.458	11.0682	10.4972	10.2291	10.4579	10.5804	10.7525	11.6326	11.4918	11.5024
TDT	AT5G47560	AT5G47560	10.8677	10.4483	8.79015	11.8759	11.9203	11.4044	11.0096	11.0427	10.184	8.38236	9.44473	7.59003	9.83625	8.81629	8.34679	7.52514	8.25985	7.95797	8.00918	8.19333	7.89845	9.60798	6.59142	10.2354	8.11505	8.34729	6.70767	11.8167	10.8786	12.3657	11.6094	11.6865	11.3213	10.8296	11.2729	12.3151	11.3046	10.0775	10.589	9.22726	10.7642	9.57152	10.0739	10.091	9.88613	8.75957	9.72204
RSR4	AT5G01410	AT5G01410	12.3235	12.0639	11.2371	10.4648	10.5568	10.6101	11.151	10.2294	10.8414	11.4908	12.0253	11.0385	11.0527	11.1568	10.7663	11.3194	11.5427	11.2509	11.4651	11.9276	11.2424	10.9342	11.3632	10.9418	11.8757	11.0844	11.1689	12.2002	11.2839	11.3834	9.83044	10.4153	10.2899	11.2349	11.6593	11.1529	11.945	11.3046	11.7242	11.2867	11.069	10.7771	11.8194	11.2426	11.3144	11.1762	11.8729
CAF1a	AT3G44260	AT3G44260	12.0301	10.9236	8.4548	6.17253	6.56534	7.91875	7.67662	9.15541	7.70889	12.1739	12.5145	11.9753	9.66452	9.61185	9.34631	8.36881	8.29302	8.67293	11.1065	11.5201	11.1205	7.90243	7.23839	7.2854	6.9606	10.3486	6.79188	10.8472	11.7061	7.7248	6.509	5.66036	6.02253	10.8022	10.7033	6.26773	10.1712	9.74843	8.78087	5.34433	6.0661	5.36045	8.10447	7.77919	6.99074	9.63469	9.6715
AT3G56340	AT3G56340	AT3G56340	10.6117	10.8632	11.8763	9.90091	9.95735	9.302	10.624	10.5865	10.3121	11.5089	10.9317	11.4312	10.7003	10.522	10.6144	11.4408	10.6686	11.4605	11.6075	11.539	11.531	10.1102	10.8683	9.76673	10.8204	11.0547	11.6787	10.5035	9.96792	10.3438	9.52414	10.249	9.08207	10.0559	10.2033	10.2624	10.3932	11.5336	11.1892	10.5207	10.2052	10.4875	10.5273	10.8515	11.4907	11.3457	11.6049
NIR1	AT2G15620	AT2G15620	10.4677	10.638	10.2161	9.09132	9.09861	9.22143	9.03767	8.37164	9.94677	11.9323	12.3347	10.8422	9.18659	9.2521	8.85491	9.91487	9.98212	9.88585	11.8068	12.0141	11.3745	8.40618	10.5926	8.45113	9.75746	8.81249	9.62926	11.6691	10.3514	9.95984	8.63657	8.56069	7.56125	10.5979	11.028	9.67679	11.4198	11.2262	11.3263	9.28985	8.97353	9.21594	10.2308	10.6662	9.35574	10.948	11.7934
CNI1	AT5G27420	AT5G27420	7.40221	6.02734	5.80814	7.67811	8.52631	9.86063	7.73706	8.82065	8.51507	6.09256	5.07313	6.50476	8.8301	6.77516	8.20603	5.81306	8.0596	7.41154	4.30439	4.19598	5.4032	8.10091	4.44745	8.2394	6.34257	12.6939	5.41762	6.03794	7.14793	4.99331	7.46536	7.46294	8.72044	6.06912	5.72346	4.31858	7.91982	7.46858	6.51556	5.90728	7.55802	7.7364	7.79546	7.98335	6.81303	4.2293	4.52104
GAE1	AT4G30440	AT4G30440	12.2603	12.108	10.9462	9.59796	9.92687	9.90379	9.59263	9.69551	10.4354	11.9702	12.3084	11.4089	10.9557	10.988	10.4447	10.7919	10.5103	10.2492	11.1515	11.3102	11.0339	9.85015	10.0928	9.63372	10.064	10.0552	9.44756	12.0376	12.0257	11.2251	9.66525	9.46474	8.06805	11.6743	11.7964	11.5039	11.0485	10.8534	10.7038	9.74586	9.1283	9.32869	9.47033	9.48182	9.65133	10.7946	10.7904
EMB3119	AT3G04790	AT3G04790	11.6578	11.6977	12.0036	9.0431	9.79499	8.92484	10.0211	9.05865	10.5713	12.0974	11.7736	11.8214	10.066	10.6233	9.94963	10.6063	10.5273	10.2484	11.7726	11.6538	11.5863	9.66397	10.7047	9.84829	10.7925	9.5358	10.7351	11.4328	11.1371	10.9018	9.13846	9.51054	7.50363	11.015	11.1701	10.6858	11.2525	11.5547	11.7269	10.7611	9.9579	10.1851	10.4313	10.8185	10.3692	11.7553	11.9375
AT3G53890	AT3G53890	AT3G53890	10.4371	10.6422	11.79	11.1486	11.3848	10.4108	11.3536	11.4348	10.6478	11.6684	10.7913	11.5083	11.3179	11.1817	10.9235	11.8237	11.1219	11.8342	11.4946	11.4402	11.6258	10.7714	11.2425	10.5654	11.3773	11.3449	11.8883	10.405	10.1006	10.2167	10.3649	10.9265	10.0085	10.1831	10.3165	10.1506	10.1943	11.1114	10.9332	11.1678	10.6577	10.7402	10.8655	10.7601	11.3	11.1995	11.3845
AT5G28060	AT5G28060	AT5G28060	11.073	11.0834	12.1565	10.9127	11.1792	10.0646	11.2606	11.5726	10.8056	11.6828	10.8488	11.6115	11.5783	11.4624	11.7667	11.8622	10.9183	11.8198	11.5613	11.4387	11.6484	11.3142	11.6604	10.8372	11.0972	11.2109	11.9887	10.8331	10.5592	10.9569	10.2031	10.6218	9.95035	10.4274	10.4944	10.9394	10.3051	11.2867	10.9349	11.27	10.4581	11.0154	10.4967	10.6526	11.3185	11.1981	11.2054
AT2G31610	AT2G31610	AT2G31610	10.0668	10.3874	11.4249	9.33907	9.64983	9.21165	10.4431	10.3269	9.6849	10.9704	10.1109	10.7428	10.1914	10.3809	10.3249	11.0016	10.1977	11.1507	11.1562	11.1334	11.0573	10.0089	10.6636	9.78578	10.4952	11.0453	11.3354	10.0492	9.60912	10.0457	9.73941	9.98696	9.84699	9.70777	9.83368	9.96676	10.4707	11.5796	11.1346	10.8819	10.4074	10.658	10.5734	10.9374	11.9337	11.4066	11.3995
ALDH11A3	AT2G24270	AT2G24270	11.66	11.4306	10.8969	8.99322	9.26293	9.19188	10.7758	10.5098	10.8143	10.6766	11.133	10.6889	10.3568	10.8383	10.7055	10.9337	10.8641	10.9864	10.2272	10.3419	10.4639	10.5345	10.8309	10.3614	10.6235	9.936	10.8199	11.7872	11.6699	11.9957	10.559	11.0717	9.27953	11.5928	11.7262	11.7351	11.7225	11.317	11.5905	11.5345	11.122	11.3051	11.8241	11.1651	11.0086	11.5391	11.4667
SAG20	AT3G10985	AT3G10985	9.81241	9.89016	9.25268	11.4247	11.1827	13.4573	11.4875	12.1411	10.9145	11.548	11.4862	11.6952	11.7512	10.7108	10.5708	10.8874	11.4059	10.8086	10.7702	11.1535	10.1038	11.153	10.9445	11.9097	11.192	12.1665	10.264	9.09156	10.0546	8.87742	9.23047	9.69087	10.9049	9.93106	9.41203	8.65105	9.76108	9.35057	8.83259	9.94714	11.3188	10.2834	9.68834	9.84369	8.74599	9.57034	9.2751
AT4G34150	AT4G34150	AT4G34150	12.2139	11.8198	10.3439	11.0532	11.0731	11.7728	10.5016	10.5541	11.2799	12.2183	12.8703	11.8597	11.4384	10.3927	10.9965	10.8488	11.5179	10.8797	10.3608	10.094	10.1392	10.7762	8.6654	11.2243	9.67618	11.2707	8.99957	10.6419	11.6171	9.77691	10.0522	10.3089	10.8924	10.7686	10.5514	9.22111	11.5981	11.4798	10.6523	10.3486	11.2597	10.9752	10.7859	10.9602	10.1601	10.5651	10.5682
SNG1	AT2G22990	AT2G22990	11.1484	11.3714	11.2791	10.1782	9.58741	9.53555	10.5745	9.53601	10.2388	11.1067	11.7854	11.0232	10.0696	10.2555	9.96609	9.11991	9.42943	8.84182	10.9418	10.8309	10.9644	9.27973	9.50751	8.93781	9.78401	8.51784	8.95156	9.79865	10.9028	10.2554	8.91777	8.54929	8.28879	10.6425	10.4215	9.30967	11.817	12.005	11.9691	11.1866	10.5675	10.5914	10.2658	10.6755	10.1535	11.8627	11.9055
AT5G08050	AT5G08050	AT5G08050	11.6827	11.6693	11.947	8.27885	8.64001	7.69832	9.75367	9.20494	10.4779	12.0178	11.633	11.6386	9.2627	10.1671	9.62732	10.0013	9.92431	9.68255	11.5974	11.2021	11.3444	8.86779	10.0219	9.15852	9.96891	8.38191	10.0619	10.429	10.5683	9.76206	8.00374	8.36644	7.21139	10.4457	10.572	9.70173	11.2419	11.7305	11.6846	10.6475	9.57992	9.93673	10.1675	10.6712	10.1799	11.7045	12.0021
LDOX	AT4G22880	AT4G22880	3.95985	2.36602	2.32775	6.89173	6.779	3.59301	3.06636	5.40643	2.92607	2.68351	2.33897	2.73496	6.06889	5.49554	4.43659	3.68102	3.92643	3.23367	2.80768	2.6204	5.32092	5.34905	4.44745	6.33492	4.26828	3.21309	6.66364	3.27551	5.41827	7.33296	12.7014	13.0555	10.0964	10.2781	7.72978	10.0975	2.47158	2	2.26384	7.02675	3.09664	4.83293	2.63485	2.43066	3.8608	3.075	2
PRXQ	AT3G26060	AT3G26060	10.3245	10.7174	11.5757	6.65559	6.53626	6.22086	7.38709	7.63596	9.66904	11.2457	10.628	11.3371	8.18998	9.09465	8.67076	8.87524	8.78456	8.71298	10.9846	10.3411	10.6147	8.08537	8.99947	8.13925	9.05533	7.28788	9.56091	9.55571	10.1441	9.24308	6.75764	7.46294	6.86754	10.396	9.95764	9.8042	11.0777	11.6802	11.8112	10.1459	8.99943	9.60993	9.52331	10.5545	9.63136	11.9979	12.0816
AT1G21520	AT1G21520	AT1G21520	7.22243	6.90108	7.58285	11.9286	12.0894	13.4185	11.2958	11.7349	11.6621	7.18799	6.57153	7.53597	10.7682	8.98186	10.9131	9.2476	11.3223	9.74297	6.74893	5.59744	7.42078	9.54122	8.44801	10.0782	10.516	11.0014	8.37165	4.39576	5.32834	5.35178	8.54028	10.0691	6.59149	6.37706	4.45645	4.25655	6.95249	7.62029	7.50295	9.35616	11.1042	10.1409	11.9872	11.3758	10.3172	6.44911	6.296
WRKY18	AT4G31800	AT4G31800	6.97974	6.32628	5.64124	9.83447	9.60502	10.9545	8.47406	7.70645	8.73215	12.554	12.7552	11.9892	10.6586	8.88899	9.28347	10.689	10.9938	10.0196	7.85873	7.14516	6.52929	9.97975	7.20611	10.011	7.54253	10.6288	7.57278	4.78374	5.77667	4.39715	7.34385	6.07514	8.08779	6.17923	5.34438	4.31858	6.34562	6.69561	5.2971	7.42668	9.96339	9.25868	7.92798	9.02489	7.21177	5.69926	5.43241
AT3G29240	AT3G29240	AT3G29240	10.4023	10.196	10.1568	10.2669	10.2381	11.3181	10.3726	10.7834	11.5949	9.13018	8.81043	9.50192	9.99156	9.35834	9.44096	8.19505	10.4263	8.28622	8.5026	8.21436	8.75928	10.6617	7.93394	10.47	9.14612	9.38323	7.8201	9.50663	10.0651	9.03398	9.70281	8.65946	8.27163	10.0257	9.91642	9.58986	11.009	10.9876	10.9867	10.5855	12.2565	11.4758	10.3602	12.2488	9.57173	10.8065	10.8666
AT5G13210	AT5G13210	AT5G13210	4.57402	4.82062	4.27076	5.66151	5.51008	5.25872	8.4917	9.5634	4.57302	5.19875	5.53533	4.97544	5.64479	5.35768	6.31581	8.20946	5.60934	10.0318	4.41001	4.67198	4.40626	6.43196	5.26762	6.50552	5.29873	12.5869	8.80389	3.27551	4.40787	2.74316	4.30029	4.63287	7.74653	3.53696	3.81296	4.49009	4.28281	3.82614	3.92954	4.67495	5.25387	5.69146	5.45284	3.70534	10.4776	3.68411	2.70664
FLA2	AT4G12730	AT4G12730	9.91716	11.3473	11.1016	5.03062	5.67923	5.91814	6.60537	7.88203	9.61707	12.0161	11.577	11.5275	8.27207	10.1074	9.89526	10.8784	10.4252	9.88791	11.9321	12.0193	11.4188	8.7297	10.987	8.13183	10.8191	9.66559	10.2998	8.76529	10.1927	5.31969	3.05006	4.57406	5.48128	9.55858	9.12339	7.9116	10.2972	10.9563	10.8109	9.19404	7.67516	8.42501	8.70808	9.60551	8.86152	11.1642	11.3873
SIP2	AT3G57520	AT3G57520	8.06743	7.35239	6.72821	9.50133	10.1945	9.21165	9.56511	8.96728	6.68665	8.57808	8.99848	8.64688	8.58038	8.28074	8.56425	9.15942	8.13472	8.88164	9.76977	9.53507	7.38073	8.65799	8.48883	9.37528	9.81394	9.15706	7.79651	9.02341	8.87125	11.0955	12.2902	11.8011	13.7923	9.04063	9.49622	11.9438	7.14606	7.09155	7.95427	7.78714	8.57744	8.79556	8.22664	6.0426	8.16067	6.80375	6.81638
AT4G40030	AT4G40030	AT4G40030	12.1691	11.8454	12.0408	11.4535	11.7159	12.0163	11.5065	11.5753	11.541	11.772	11.8476	11.6668	11.7391	11.5904	11.2714	11.5471	11.3507	11.4954	11.7843	11.9518	11.8584	11.5152	11.5038	11.9135	11.4417	11.5082	11.5216	12.0046	12.1403	11.9762	12.222	11.3926	11.5323	12.2054	12.2027	12.061	11.8327	11.6067	11.4938	11.5611	11.5294	11.3005	11.4369	11.2162	11.5321	11.7479	11.9103
AT1G41880	AT1G41880	AT1G41880	10.4761	10.7074	11.8482	10.0572	10.1616	9.22143	10.2909	10.4712	9.99846	11.5573	10.7224	11.4261	10.7352	10.8372	10.6329	11.5492	10.5666	11.4333	11.5393	11.5885	11.6414	10.3566	11.0716	10.1644	10.8395	10.9615	11.6077	10.6055	10.0558	10.5907	10.3317	10.4878	10.1952	10.1613	10.3605	10.4645	10.4879	11.4883	11.2103	10.9123	10.4226	10.7418	10.6692	10.698	11.459	11.5197	11.5615
AT2G01250	AT2G01250	AT2G01250	10.4163	10.7698	11.9	10.2981	10.3696	9.56658	10.7649	10.9462	10.3324	11.7299	10.8313	11.6241	10.8599	10.9811	11.0028	11.376	10.7629	11.379	11.6875	11.539	11.8277	10.7119	11.2713	10.5006	10.9907	10.8946	11.6991	10.5964	10.2304	10.5359	10.0772	10.2998	9.27523	10.286	10.4169	10.4891	10.4179	11.5046	11.1097	10.8424	10.364	10.789	10.5997	10.809	11.3526	11.5413	11.5896
ATAF2	AT5G08790	AT5G08790	8.57196	7.52519	7.36801	8.45134	8.89606	10.7802	9.46592	9.69055	9.64329	8.83324	9.13251	8.06115	9.42608	7.76685	8.64826	8.01396	8.97765	9.05112	7.92705	7.98475	7.36028	8.88584	7.12786	9.06413	8.04214	12.6552	7.89181	7.35709	8.17551	6.46686	7.31827	7.68065	9.49445	7.60691	7.17038	6.29884	7.50043	7.43258	6.87254	7.27438	8.86967	8.43332	8.17239	9.00744	8.8484	6.88705	7.09507
AT5G19760	AT5G19760	AT5G19760	11.3499	11.3658	11.5592	10.045	10.2604	9.99785	11.0344	10.7693	11.042	11.7544	11.6464	11.5726	10.5938	10.8089	10.7442	11.3198	11.2637	11.2946	11.6822	11.7989	11.3719	10.5416	11.3287	10.3694	11.3496	10.5332	11.5139	11.089	11.1002	10.6256	9.93091	10.4195	9.54887	11.0329	11.0681	10.9541	11.1164	11.366	11.4294	11.0705	10.5918	10.8683	11.2231	11.287	11.2108	11.4789	11.7098
ACBP6	AT1G31812	AT1G31812	12.2844	12.0713	11.6292	11.3284	11.6748	11.9821	11.4572	10.8371	11.4612	11.8678	12.3317	11.3975	11.389	11.5133	11.3077	11.2743	11.3354	10.8735	11.5158	11.7409	11.423	10.9957	11.7922	10.9712	11.6627	10.8129	10.7719	12.2995	11.8944	12.0389	11.57	11.4987	10.2984	11.888	12.2464	12.377	11.4344	11.3334	11.2976	11.3543	11.2014	11.1204	11.4691	10.6846	10.7359	10.9251	11.7586
SAG24	AT1G66580	AT1G66580	9.52609	9.5038	10.6231	10.2857	10.5513	10.8685	10.885	11.2261	10.1387	10.5656	9.9031	10.5904	10.9803	10.3971	10.8306	10.9381	10.6274	11.0558	10.6912	10.739	10.5959	10.7295	10.6214	11.1728	10.6294	12.5548	11.0726	9.57427	9.2207	9.47569	9.99487	10.7183	11.4024	9.44192	9.41355	9.57723	9.26413	10.1206	9.85654	10.1676	10.4813	10.3152	10.1081	10.1184	11.0571	10.1009	10.1408
AVA-P2	AT1G19910	AT1G19910	11.2439	10.9899	10.9236	12.3338	12.4994	11.6906	11.702	11.5295	11.2641	10.8768	11.2773	10.6873	11.8294	11.3608	11.2273	11.324	11.2439	11.2628	10.928	10.905	10.7681	11.1568	11.3608	11.3954	11.5298	11.2121	11.1679	11.1947	10.8296	11.4194	11.71	11.9735	12.3527	10.7737	11.0677	11.3689	11.4392	11.2833	11.7132	12.0031	11.8929	11.7618	11.7758	11.527	11.74	10.8625	11.0737
XTH7	AT4G37800	AT4G37800	10.9411	11.0757	9.59096	5.10766	5.09737	6.09881	7.3359	6.7144	8.93148	10.7566	11.5559	9.34571	8.0538	8.58871	8.58808	8.456	8.88433	7.82669	10.6406	10.674	10.4275	6.40718	8.77582	7.36357	10.0345	7.56899	7.52437	10.1034	10.3342	8.4471	4.49552	4.9428	4.36725	9.58454	10.5122	7.69487	12.167	11.3584	12.0459	10.8299	9.0416	9.96949	9.75261	9.99594	9.48959	11.0539	11.6634
SOT16	AT1G74100	AT1G74100	9.32159	9.37669	8.78349	8.34398	8.03827	9.52374	9.5748	10.0101	9.587	11.7427	12.158	11.3395	9.7877	8.47662	9.06989	10.5251	10.9099	10.3505	12.1184	11.8669	11.3084	10.3918	11.6574	9.24711	10.7541	10.6437	10.4391	9.80913	10.1959	8.51245	8.35143	10.4617	9.78787	9.78693	9.64986	8.59263	10.0311	8.82967	8.74623	8.42496	9.02698	8.63422	9.47929	9.4187	8.51639	9.20594	9.43117
DWF1	AT3G19820	AT3G19820	9.73344	10.4672	11.0868	6.68102	6.92075	7.58166	9.55535	10.4317	10.1615	10.4982	9.56058	10.7428	9.52468	10.2408	10.9894	11.588	10.2944	11.1203	10.2108	9.45634	10.4487	10.2682	11.1507	10.013	9.64031	9.01906	11.5805	8.77334	9.83137	8.39415	7.16885	7.37954	5.93804	9.7606	9.23936	9.1841	10.0161	10.8219	10.5686	10.7193	9.49141	10.8962	10.1545	10.9317	10.232	11.0569	10.8169
EMB3105	AT1G48350	AT1G48350	10.7412	11.0781	12.3298	8.2621	8.80147	8.20171	9.38166	9.05479	9.91484	11.7938	10.8808	11.8737	9.48816	10.4532	10.1819	10.0481	9.58677	9.8588	11.3746	10.8926	11.3146	9.68216	10.5905	9.51884	9.46437	8.25691	10.8336	10.0145	10.4165	10.0688	8.28034	8.8909	7.09915	10.4098	10.1238	9.86001	10.3664	11.5536	11.4222	10.9728	9.79611	10.5073	9.94504	10.3636	10.3847	11.8335	11.9842
GolS2	AT1G56600	AT1G56600	8.88582	5.74611	3.33932	8.2621	9.29366	10.8497	9.27868	9.34092	9.06355	4.81976	8.25208	3.35059	7.75321	4.97315	4.92987	4.22577	6.00218	4.98681	4.24853	6.43273	5.17241	5.44956	4.88818	5.61105	6.47881	6.80018	3.56722	11.8437	10.8364	11.973	9.06346	10.1619	8.87044	10.6643	11.2834	12.3944	9.51038	3.82614	5.89201	6.21683	8.81236	6.0641	8.84155	7.51958	5.57569	2.24422	3.53405
ACR9	AT2G39570	AT2G39570	8.29688	8.29272	7.47115	7.33785	7.02908	8.23106	10.653	9.68058	8.66975	5.53677	6.16597	6.15626	8.14377	8.84667	9.03217	11.3684	9.8891	11.0036	8.05875	7.9559	6.98611	8.5546	9.2601	8.8087	10.1441	9.79326	10.4639	7.72136	7.92246	8.66713	7.79704	7.52635	6.86754	7.38195	7.81506	8.00887	7.97406	7.79583	7.31938	8.70121	8.40079	9.0256	10.6315	9.62089	10.7332	7.42812	7.64326
RLK902 AT3G18740	AT3G18740	AT3G18740	10.6873	10.8818	12.1003	10.3702	10.7778	9.88852	11.1657	11.1532	10.4724	11.5439	10.8144	11.4418	11.0183	11.1603	10.7463	11.558	10.7408	11.5442	11.6643	11.6311	11.6907	10.6656	11.169	10.638	11.0919	11.3497	11.8156	10.8344	10.168	10.8626	10.4601	10.7216	9.83244	10.2075	10.5094	10.8265	10.2169	11.1312	10.9717	10.8736	10.4432	10.5702	10.6174	10.6662	11.2738	11.1276	11.4315
rbcL	ATCG00490	ATCG00490	11.643	11.8571	11.0581	8.97277	8.91313	8.61926	8.91441	8.46172	9.88219	11.3377	10.6793	10.7346	9.72854	9.57603	9.13282	10.0974	9.65215	9.10169	10.1701	12.6538	10.344	8.75938	9.55099	8.60387	9.49683	8.34729	9.05458	10.8306	10.448	10.7632	8.55678	8.91775	10.277	10.167	10.121	10.1602	10.32	10.0668	10.3022	9.39207	8.46727	8.75854	8.93141	9.34653	7.98297	9.54776	9.75407
EMB3136	AT5G13510	AT5G13510	11.1252	11.4087	11.7618	8.74456	8.91877	8.45486	9.4175	8.99168	10.0286	11.7396	11.4744	11.6394	9.65514	10.3645	9.85654	10.2217	10.1493	9.98154	11.5552	11.2095	11.3066	9.40079	10.3247	9.34027	10.1297	8.83765	10.3802	10.8046	10.6951	10.3948	8.79332	9.0824	7.21139	10.7674	10.7612	10.2574	11.2089	11.7237	11.6169	10.6241	9.89833	10.313	10.1923	10.6625	10.3065	11.961	12.0052
J11	AT4G36040	AT4G36040	10.2983	9.64579	8.39484	12.3864	12.5888	13.0828	11.0101	12.4154	11.3581	9.41782	9.5626	10.6003	10.7877	11.4139	10.6824	8.39111	10.6366	8.48435	10.7172	10.7772	10.7174	11.8506	9.09658	12.4204	10.9532	11.0408	8.59514	10.9502	11.2465	11.6081	13.0687	10.7543	10.0136	11.262	11.0443	10.6326	10.8782	10.2234	10.0481	11.1053	11.3162	11.5307	10.1023	9.75471	8.56933	10.0344	9.89289
AT5G52650	AT5G52650	AT5G52650	10.1593	10.5079	11.7105	10.7283	10.8739	10.0995	11.3211	11.1993	10.8414	11.4089	10.424	11.2719	11.156	10.8996	11.1684	11.5054	10.8547	11.4845	11.4543	11.4067	11.377	10.4761	11.1536	10.2372	10.9845	10.9629	11.681	10.0088	9.50693	9.8768	9.62409	10.3357	9.73877	9.57737	9.65501	9.815	10.0021	11.2218	10.8534	11.1364	10.4338	10.9367	10.7287	11.0614	11.4196	11.1804	11.242
AT3G55750	AT3G55750	AT3G55750	9.75841	10.1232	11.2968	9.64394	9.9128	8.94269	10.3726	10.3396	9.57001	11.0451	10.0602	11.0263	10.2171	10.3479	10.2552	11.1368	10.2408	11.2493	11.1676	11.137	11.1825	9.80344	10.6587	9.58015	10.5573	10.877	11.4757	9.89652	9.43334	9.74404	9.65507	10.1718	9.77271	9.62541	9.76746	9.73481	10.128	11.3059	10.9207	10.7449	10.2089	10.5589	10.5055	10.6198	11.7515	11.3749	11.3017
AT2G42220	AT2G42220	AT2G42220	11.095	11.3422	11.7542	6.60334	7.07023	7.29715	9.21636	8.52438	9.95202	11.6114	11.4219	11.5684	8.60007	9.78768	9.21165	9.81356	9.1736	9.52737	11.5953	11.1036	11.4106	8.78365	10.0001	8.37139	9.38162	8.32076	9.97303	9.83758	10.4074	9.65841	5.50452	7.12683	6.02253	10.0966	10.0258	9.50404	10.8355	11.6879	11.3531	10.2567	9.28747	9.764	9.56461	10.3719	9.89014	11.8632	11.9532
AT3G09630	AT3G09630	AT3G09630	10.3375	10.5429	11.5187	9.62113	9.5479	9.32939	10.3757	10.6338	9.98571	11.0484	10.2276	10.9694	10.1619	10.2539	10.3278	11.2883	10.3983	11.3831	11.3091	11.2312	11.241	10.0414	10.6286	9.74011	10.4734	11.5861	11.5054	10.1546	9.70157	10.2868	9.85733	10.1316	10.2223	9.78445	9.94193	10.1958	9.98784	11.2363	10.792	10.2294	9.79364	10.0707	10.2658	10.5973	11.6455	11.1161	11.0167
PRPL35	AT2G24090	AT2G24090	11.2121	11.4233	12.4364	8.39097	8.96315	7.9426	9.63162	9.20146	10.2302	12.0246	11.3709	11.9503	9.50914	10.4015	9.90857	10.2181	9.93336	10.0196	11.6044	11.167	11.3834	9.4562	10.4846	9.5692	9.87078	8.541	10.6179	10.2786	10.603	10.2101	8.20558	8.78469	7.31552	10.5386	10.2993	9.98242	10.4015	11.4677	11.3397	10.6042	9.31524	9.99593	9.75753	10.1166	9.94433	11.5866	11.7857
ANNAT1	AT1G35720	AT1G35720	8.5339	8.14747	9.39283	10.1073	10.2803	8.34282	9.3368	10.0667	9.33286	9.07613	8.94056	9.68849	9.82374	9.75601	10.0179	9.58396	9.17868	9.45559	9.07624	9.27137	9.49248	10.1236	9.78388	9.90167	10.1379	9.46221	10.0655	10.994	10.8309	11.8527	11.1417	11.7894	10.3256	10.7686	11.2188	12.7732	9.33147	9.56387	9.99347	9.87505	9.86231	9.81155	9.7365	9.77547	9.99284	9.25554	9.05964
AT1G19020	AT1G19020	AT1G19020	9.31037	8.07516	7.77653	8.90424	8.68044	11.1465	8.8221	9.11155	9.17108	10.5103	10.7853	10.2329	10.1351	7.82904	9.45139	8.23433	9.73381	8.90826	8.16063	8.08712	8.07617	8.94729	6.337	9.96154	6.78248	12.5603	6.447	6.22181	7.44753	4.51522	6.63867	6.9646	9.35071	6.29557	6.14549	4.64337	8.65462	8.62694	7.39012	7.14127	8.89979	8.62457	8.1907	8.43872	7.14358	6.74542	7.43775
AT5G02450	AT5G02450	AT5G02450	10.4811	10.7438	12.2069	10.3326	10.5658	9.93087	10.7282	10.9104	10.407	11.5137	10.4061	11.7441	11.1317	11.1155	11.3241	11.3425	10.5569	11.4835	11.4558	11.2652	11.5329	10.8539	11.4542	10.5446	10.8062	10.9912	11.7498	10.2491	9.97535	10.43	9.64995	10.2666	9.33013	10.0383	9.95451	10.3861	9.59359	11.1433	10.8715	10.9252	10.1504	10.7618	10.0749	10.3719	11.3006	11.1735	11.0394
WRKY70	AT3G56400	AT3G56400	11.0862	10.5837	10.0089	10.5926	10.4882	11.8599	9.93015	10.2464	11.2767	8.33441	7.04647	8.11284	10.3217	8.97795	9.52978	7.82099	9.54016	7.6535	8.97446	9.19053	9.0227	10.722	8.35784	10.7682	9.67618	11.5674	8.47079	7.17454	9.05769	4.62435	9.02839	8.19654	9.28809	8.63408	8.05602	5.69657	11.3827	10.9183	10.1392	9.24274	11.993	10.9633	10.7517	11.9927	9.3935	8.75219	9.57917
AT3G07110	AT3G07110	AT3G07110	9.78296	9.9984	11.3263	9.01338	9.50727	8.42977	10.0078	10.1539	9.44889	10.8121	9.84778	10.4748	9.93259	9.91602	10.0056	10.8361	9.83703	11.0695	10.991	10.9125	11.0094	9.52115	10.2994	9.03258	10.1795	10.9233	11.2084	9.78676	9.08998	9.72578	9.20627	9.90433	9.61499	9.21142	9.47745	9.76436	9.6051	11.0056	10.5686	10.4199	9.68742	10.0636	10.037	10.2821	11.9542	10.8919	10.9408
EFE	AT1G05010	AT1G05010	10.6298	10.5858	11.2612	11.2834	11.1967	11.9531	10.2825	10.6505	11.3017	11.783	11.6511	11.7486	10.9775	10.0821	10.386	10.8807	11.7714	10.89	11.5995	11.5187	11.7535	10.7157	11.3054	10.8406	11.7102	11.9567	10.8111	8.69637	9.63748	7.35688	9.70527	10.3836	11.1464	8.90297	8.70126	8.31304	9.81285	10.3429	9.89839	10.0514	11.389	10.5333	10.2563	10.719	10.5066	11.1333	11.274
AT3G26450	AT3G26450	AT3G26450	11.4478	11.0358	10.4862	9.5049	9.50352	9.32032	9.16228	9.14094	10.1341	10.5446	11.2902	10.5085	9.60485	9.83607	9.89717	9.63823	9.66126	9.50205	10.4709	10.4958	10.8052	9.48609	9.64027	9.3467	9.98959	9.43773	9.27054	11.9512	11.8688	11.3491	10.283	9.98977	7.68305	11.6091	11.9232	11.4637	11.8633	10.9451	11.3131	10.8127	10.2714	10.3301	10.4056	10.1681	9.72317	11.1036	11.7038
AT4G28460	AT4G28460	AT4G28460	2.49865	2.36602	3.47787	6.02145	6.41371	7.53536	5.46332	6.02626	2.92607	4.54803	3.04224	4.55383	6.71797	3.24519	4.66888	4.04473	2.59388	6.20183	2.64413	2.4417	2.98368	4.70351	2.35435	5.32878	3.00331	12.5592	3.95589	2.26661	2	2.74316	3.47734	3.16267	8.64915	2	2	2.50572	4.09973	5.30897	3.76893	2.78086	4.26159	3.65631	3.8398	4.10588	5.783	2.45302	2
AT1G49500	AT1G49500	AT1G49500	9.7721	9.39661	8.79015	10.2437	10.4977	9.68088	7.46063	7.99897	7.56545	10.6255	11.588	9.53158	9.80477	8.25508	7.4861	6.96994	7.66991	6.99634	10.6242	11.1733	10.2076	8.34225	8.20833	8.56027	9.28642	7.58888	6.85196	11.7819	10.9073	12.2218	8.09694	8.95568	7.69597	9.43718	10.9558	12.1051	10.3545	10.2649	10.4732	9.95551	9.59557	9.36247	8.02914	8.96991	7.75937	8.29746	9.27804
PGR5	AT2G05620	AT2G05620	12.4	12.0636	11.9161	10.8454	10.7963	10.4938	10.7794	10.2815	11.2037	11.8308	12.0472	11.4074	10.5777	10.7389	10.1228	10.5571	10.7922	10.5678	11.3701	11.396	11.158	10.3485	10.6823	10.3293	10.9308	9.93114	10.5389	11.944	11.5018	11.5608	10.1315	10.1481	9.85853	11.3943	11.6784	11.8085	11.6887	11.5592	11.6726	10.9599	10.6031	10.5223	10.901	10.9763	10.6819	11.4792	11.9555
AT5G16130	AT5G16130	AT5G16130	10.1635	10.5977	11.7795	9.07223	9.47698	8.4213	10.2595	10.5168	10.6134	11.4325	10.5425	11.3016	10.5182	10.7108	10.7109	11.2308	10.3818	11.281	11.436	11.3373	11.5264	10.2904	11.0626	9.96154	10.5998	10.8536	11.5286	10.3387	9.91741	10.2167	9.55185	10.1805	8.96953	9.9862	10.1303	10.1335	10.1885	11.3853	10.9555	10.862	10.064	10.6075	10.2554	10.5228	11.4579	11.4058	11.3866
AT5G47190	AT5G47190	AT5G47190	10.5092	10.8131	11.9724	8.58532	9.26736	8.49574	10.7238	9.74897	10.0161	11.5826	10.9104	11.6486	9.82583	10.7423	10.5382	11.2803	10.2396	11.0654	11.3146	10.8926	11.2194	10.1941	11.0618	9.97405	9.97353	9.30571	11.3433	10.1034	10.5418	9.95723	7.84261	8.99263	8.15483	10.5758	10.1117	10.0342	10.117	11.2488	10.8708	11.1249	10.0517	10.4626	10.681	10.4378	10.8693	11.6184	11.4847
AGP16	AT2G46330	AT2G46330	10.9411	11.8935	11.2838	9.06741	9.28057	10.4938	9.12884	9.07015	10.4924	11.671	10.8645	11.7284	10.6445	10.6954	10.7152	10.4019	11.0074	9.11054	10.2254	9.41757	10.6544	9.39134	8.58819	9.50741	9.2564	12.3609	8.96371	8.25371	9.54236	7.93537	7.58817	8.3358	11.0365	8.75332	8.72349	8.00416	10.199	10.7173	10.2326	8.7136	8.52192	9.11618	8.23725	9.27381	7.84774	10.381	10.4083
RPS18C	AT4G09800	AT4G09800	10.664	10.6212	11.4712	11.2979	11.5013	10.972	11.7218	11.814	11.0772	10.992	10.4892	11.1291	11.7156	11.516	11.6656	11.6395	11.1147	11.7149	11.0417	10.9099	11.0526	11.4561	11.6894	11.2261	11.1219	11.107	11.6534	10.7043	10.4753	10.8044	10.5286	10.9469	9.6847	10.4393	10.5733	10.8543	10.2802	11.108	10.8547	11.6583	11.0862	11.4249	11.2751	10.9653	11.4957	10.9993	11.0787
AT3G51450	AT3G51450	AT3G51450	6.48994	6.32628	5.02529	6.89173	6.94307	7.86983	6.64796	6.17571	6.60896	11.768	12.3856	11.1993	9.11311	6.7931	7.2908	8.99029	10.4231	9.05479	11.6408	11.5818	11.0494	9.65873	10.2528	8.4748	11.3044	10.7341	9.64066	6.8382	7.80512	6.67145	5.25775	6.70165	6.28444	7.89667	6.5621	6.62763	7.25962	5.19899	5.61322	6.13074	8.19198	6.76321	7.19226	7.09677	6.02379	5.75945	5.47403
AT5G03850	AT5G03850	AT5G03850	10.4354	10.5902	11.8482	10.7939	11.135	10.2384	11.1211	11.0241	10.3182	11.5303	10.8554	11.4289	11.0897	11.0424	10.9439	11.6448	10.8112	11.5832	11.5735	11.4783	11.6053	10.6722	11.1092	10.5376	11.171	11.2594	11.7348	10.693	10.2169	10.7208	10.3317	10.6514	9.49814	10.2287	10.5375	10.6924	10.1576	11.1363	10.8339	10.815	10.3985	10.5481	10.5997	10.4508	11.2565	11.0659	11.2123
PHT2;1	AT3G26570	AT3G26570	11.6385	11.9868	11.6718	9.32704	9.4024	9.35628	9.92691	9.36291	10.6559	11.5149	11.6131	11.2924	9.57779	9.97024	9.52485	10.2038	10.0695	9.98154	11.5656	11.4751	11.3505	9.49199	10.2763	9.48135	10.2966	9.29515	10.2914	11.3509	11.2103	10.895	9.65252	9.61997	7.78331	11.2951	11.3264	10.6219	11.4412	11.5861	11.5295	10.0376	9.85878	9.81049	10.2545	10.5599	10.1582	11.6329	11.7379
SVR3	AT5G13650	AT5G13650	11.1898	11.175	10.4146	8.67665	8.82571	8.65579	9.62897	8.72688	9.46735	10.5862	11.1255	9.94596	9.335	9.6369	9.2893	10.2119	9.69356	10.0411	10.3173	10.6588	10.1068	9.13632	9.50971	9.05238	9.90262	9.01539	9.89108	11.5577	10.6401	11.205	8.86132	8.99263	8.90979	10.7911	11.0497	10.7866	11.9139	11.4309	11.5961	10.697	10.3665	10.4538	10.896	10.9456	11.0298	11.3176	11.7153
CCL	AT3G26740	AT3G26740	8.37072	7.89785	6.3673	9.96702	9.97642	11.0007	9.58853	11.164	10.0606	8.13734	8.89954	8.44166	10.648	10.9811	9.57342	7.80209	9.07077	7.66315	8.45094	8.6052	8.92396	11.5693	8.28244	12.2082	10.112	9.8018	7.68347	11.0336	11.2598	12.4348	12.568	10.8402	10.8612	11.2458	11.3368	11.4646	9.92841	8.62162	9.48375	10.0455	10.4082	10.0866	9.39652	8.45883	7.71668	8.27701	8.20319
GSR 1	AT5G37600	AT5G37600	7.86769	7.4025	7.68651	10.7525	10.5294	12.4498	10.32	10.9252	10.9037	8.09959	8.48746	8.02726	11.7682	10.9604	11.1095	9.47187	11.6472	10.0121	7.7623	7.69668	8.29311	12.1661	10.2554	12.4097	11.2668	11.4819	9.47223	7.61782	7.73101	7.773	11.2514	10.2584	11.0288	8.20261	7.87808	7.06768	7.77454	7.52094	7.93547	10.6794	11.4125	11.3919	11.4529	10.9225	9.09192	6.39954	6.55064
AT5G42050	AT5G42050	AT5G42050	11.4402	10.6084	9.81664	12.0784	11.9245	12.6783	10.8276	11.2313	11.5548	10.3534	10.8734	10.5346	11.4177	10.0637	10.4705	9.31579	11.0343	10.0083	10.3715	10.2916	10.1913	10.9578	9.51412	11.3008	10.3258	12.1213	9.23839	11.0054	11.1655	11.6385	11.9084	12.1952	12.8357	10.887	10.8345	11.9937	10.4349	10.1514	9.6758	9.99158	11.6721	10.7535	11.1468	10.7916	9.97786	9.30518	9.42057
AT3G52800	AT3G52800	AT3G52800	12.0415	11.2176	9.45076	11.2241	11.2469	12.0909	10.7157	10.7528	10.7388	12.2234	12.6717	11.9097	11.494	10.4783	10.4236	10.3029	10.9558	10.5484	10.8667	11.2338	10.6347	10.4106	9.22025	10.7778	9.67192	10.9828	8.58927	11.4885	11.8611	11.1392	11.0161	10.7493	11.6424	11.3667	11.2493	11.1179	10.4357	9.9634	9.2489	8.94143	10.1875	9.45248	9.69091	9.39206	9.1901	9.48081	9.42057
STO	AT1G06040	AT1G06040	11.7889	11.6012	10.9975	10.7585	10.8608	10.6809	10.4544	10.2208	10.6233	10.7747	11.337	10.6456	10.4024	10.5367	10.1113	9.86908	9.90452	9.64651	10.8684	11.066	10.8602	10.3123	10.2127	10.3788	10.3808	9.43224	9.72519	11.8969	11.4889	12.008	11.0727	10.7132	9.37902	11.4732	11.6328	11.8625	12.0011	11.556	11.4683	10.9744	10.9226	10.6791	10.8757	10.8362	10.505	11.3531	11.6458
MTHFR1	AT3G59970	AT3G59970	10.0954	10.7935	11.2162	8.2621	8.5189	8.01187	9.00322	9.02752	9.79717	11.3829	11.334	11.3272	9.15698	9.5966	9.58767	10.4268	10.3038	10.064	12.0204	11.7565	11.7073	9.45014	11.2785	8.81335	10.7675	9.68304	10.8724	10.214	10.3514	9.08499	8.26033	8.83564	6.97744	10.3087	10.3222	9.76575	10.7291	11.1488	11.0277	9.95238	9.26629	9.59271	9.66495	10.2212	9.65321	11.3206	11.2651
ARD4	AT5G43850	AT5G43850	11.0884	10.4047	9.12932	9.512	9.93246	9.90379	9.84575	9.39069	9.56316	8.66681	9.79197	8.19363	9.12336	8.84667	8.36346	8.34617	8.82724	8.34137	8.9374	9.34949	8.56445	9.01856	8.66935	9.25738	9.22961	8.51264	8.01665	11.9464	10.8075	12.1816	9.84394	10.0929	9.32598	10.9042	11.4582	12.2682	10.8465	9.39801	10.0104	9.84607	10.1388	9.50733	10.3859	9.54499	9.49592	9.37738	9.9749
AT3G58610	AT3G58610	AT3G58610	10.4336	10.7813	11.6403	9.16976	9.37803	8.99495	10.215	10.1193	9.92556	11.5596	11.0859	11.5266	9.77042	10.1446	10.2144	10.9531	10.2359	10.9738	11.4551	11.2601	11.5727	9.71028	10.6173	9.43985	10.2892	10.7369	11.1222	10.7828	10.4788	10.6223	9.55732	10.0731	9.10163	10.4041	10.5569	10.5695	10.5985	11.5014	11.2206	10.3691	9.97758	10.2895	10.4693	10.673	11.4295	11.7058	11.6333
PIP1;5	AT4G23400	AT4G23400	11.3975	11.3196	10.5136	9.00333	8.74541	8.65579	9.11562	8.45589	9.55972	10.631	11.1013	10.1408	9.08194	9.13741	9.19001	8.97772	9.1685	8.56637	9.95241	9.60044	10.0355	9.10969	9.27833	9.26419	9.21212	8.12005	7.85966	9.67084	10.3862	8.40183	7.35648	6.79473	5.65012	9.66785	10.0128	9.00471	12.101	11.514	11.7868	10.5403	10.0351	10.0927	10.4782	10.359	9.49065	11.5901	12.1941
AT2G45820	AT2G45820	AT2G45820	11.7353	11.2287	10.5757	9.40542	9.39432	10.0619	9.9409	9.83912	9.96507	12.169	12.4947	11.1834	9.77042	9.85541	9.67928	10.6624	10.4643	10.455	11.5088	11.6085	11.0127	9.5998	10.6597	9.713	10.0055	9.41004	10.1563	11.4909	11.5573	11.0338	9.58708	9.05847	8.66894	11.1707	11.35	11.4242	11.0252	10.8579	10.6392	9.72397	9.61525	9.49679	9.71388	9.6549	9.13443	10.5595	10.991
FNR2	AT1G20020	AT1G20020	11.2251	11.3802	11.6942	8.60538	8.88457	8.86993	9.98518	9.08912	10.7111	11.633	11.7521	11.3885	10.2502	10.9684	10.2052	10.2181	10.3906	10.0512	12.0045	11.7749	11.6617	10.5726	11.0573	10.4758	10.9462	9.74642	10.4298	10.6564	11.0566	10.619	8.69736	8.7651	6.86754	11.2327	10.8334	10.4351	11.214	11.277	11.2084	10.853	9.9612	10.436	10.4189	10.8096	10.1621	11.4811	11.5086
CYP79B2	AT4G39950	AT4G39950	7.5746	8.44873	6.21712	8.09242	8.21381	10.2117	9.00936	8.71227	8.25093	9.68328	10.1718	9.85368	9.06433	7.38448	8.17489	10.3589	9.98647	9.89202	11.3676	11.803	11.2061	10.4044	11.4364	8.77572	11.0295	11.4615	10.7676	6.72095	8.61649	5.81019	6.57529	9.18667	12.7175	8.77603	7.50866	6.32929	7.75917	6.69561	6.31199	6.72763	7.49264	7.78919	7.53952	7.36985	6.96666	7.26468	7.14745
AT2G04050	AT2G04050	AT2G04050	3.16264	2.90024	3.0145	6.20795	5.96761	7.33368	9.0175	10.1647	5.81264	2.38186	3.04224	2.73496	6.39623	4.53525	5.73282	8.52676	5.19357	10.5945	2.45964	3.3851	2.66585	5.90385	4.02236	6.38575	5.35647	11.9335	9.03744	3.49917	3.75224	4.05122	6.48621	5.94195	6.50603	4.08172	4.59151	3.63188	2.97567	2.62812	2.4868	4.40843	5.3375	5.31317	5.47692	4.50995	11.7117	2.63539	2.39616
AT1G33120	AT1G33120	AT1G33120	10.3356	10.4291	11.5996	10.3144	10.5819	9.93682	10.5052	10.5998	10.2665	10.9929	10.3684	10.97	11.022	10.7833	10.9921	11.2303	10.6171	11.3911	11.2297	11.2873	11.2443	10.6178	11.1966	10.2215	10.9873	11.41	11.64	10.4848	9.87304	10.6921	10.4542	11.0483	11.3522	10.0662	10.2346	10.6953	9.83988	10.8714	10.6906	10.8999	10.3814	10.7284	10.3349	10.5738	11.7393	10.8107	10.6567
emb2184	AT1G75350	AT1G75350	11.3815	11.4734	12.2471	9.35101	9.92126	9.29275	10.3789	9.71762	10.6233	12.006	11.6905	11.8853	10.2564	10.8459	10.2744	10.6909	10.5073	10.5729	11.7096	11.4638	11.4454	10.1923	10.8264	10.1879	10.4126	9.4876	11.0029	11.0453	11.0768	10.8029	9.31696	9.58689	8.37165	11.1277	10.9796	10.6895	10.5694	11.3142	11.3785	10.8259	9.85878	10.3062	10.3513	10.3289	10.3909	11.5632	11.7082
EMB3137	AT5G14320	AT5G14320	11.1579	11.3137	12.1367	9.21399	9.64983	9.11	10.3026	9.59027	10.4559	11.9228	11.492	11.7359	10.101	11.0121	10.7087	10.3661	10.1977	10.4048	11.5939	11.1625	11.3449	10.4821	11.2385	10.2697	10.1379	9.13185	10.8464	10.6759	10.8937	10.3626	8.83451	9.20858	8.65578	10.956	10.8024	10.6463	10.9695	11.5716	11.5651	11.3211	10.1809	10.979	10.3691	10.5836	10.6449	11.6972	11.8796
AT5G64400	AT5G64400	AT5G64400	11.5323	11.413	11.7271	11.5507	11.9371	12.1586	11.1758	11.2389	11.6645	11.7123	11.9287	11.5789	12.2083	11.672	11.5128	11.3891	12.0024	11.3809	11.5967	11.798	11.5878	11.9036	11.4473	12.092	11.9042	11.8121	11.35	12.1154	11.488	12.0416	12.2349	11.8711	11.7662	11.5688	11.866	11.9579	11.5453	11.6586	11.9852	11.6965	11.9427	11.792	11.5561	11.7374	11.4421	11.4241	11.6407
MSS1	AT5G26340	AT5G26340	6.09615	5.03911	3.82803	9.90091	9.85215	10.6119	9.13821	10.2225	8.81522	5.19875	6.98747	5.0155	10.3007	8.42578	8.83513	7.3345	8.85289	8.94829	5.63733	6.44465	5.62515	9.98813	6.4331	10.6142	8.56726	12.3187	7.45718	6.54397	5.75383	7.86483	9.10892	9.00382	12.8147	5.98498	6.07039	6.28337	6.05816	4.73059	4.43688	7.33339	10.6852	9.00901	7.81448	8.54466	9.95814	4.2293	3.68346
AT5G27770	AT5G27770	AT5G27770	10.2344	10.3786	11.34	10.4333	10.6496	9.71936	10.925	10.9483	10.2832	11.0875	10.4128	10.7701	10.7296	10.6978	10.6443	11.2849	10.5501	11.3269	10.9252	10.8607	11.0846	10.446	10.9305	10.148	10.7708	10.8866	11.4236	10.2644	9.69708	10.2941	9.96633	10.2061	9.53096	9.69988	9.99162	10.1686	10.2457	11.0661	10.771	11.1732	10.5442	10.8025	10.7677	10.8062	11.7331	10.9301	11.2306
ABCC3	AT3G13080	AT3G13080	7.97575	7.15604	6.72821	8.62517	8.69367	9.90379	10.0854	10.973	9.28371	6.45342	6.40115	6.08274	9.35542	8.68793	9.39306	9.118	8.63364	10.4619	5.52426	5.46332	5.23366	9.72038	6.97022	9.75469	8.25825	12.2181	9.70633	5.84765	5.65863	6.17557	8.33876	9.40061	9.30927	6.44161	6.48323	5.54914	6.92521	6.46561	6.31199	8.47532	10.1319	9.43327	9.45374	9.08342	11.2982	5.1589	5.25277
FAD5	AT3G15850	AT3G15850	10.8446	11.2245	11.0861	7.79918	8.10909	7.29715	8.76519	7.48375	9.55972	10.9324	10.6027	10.284	8.60007	9.08012	8.50037	8.90653	8.73368	8.62928	10.9056	10.9147	10.443	8.10862	8.94183	8.08645	9.19046	7.79133	8.89715	9.5018	9.52391	8.97596	6.69938	6.43046	6.69808	9.46384	9.6369	7.84993	11.1673	11.7202	11.6637	9.97829	9.28396	9.54619	9.2365	10.4967	9.64375	11.5741	11.9606
VDAC3	AT5G15090	AT5G15090	10.256	10.3277	10.7719	9.36676	9.55878	9.47142	10.1972	10.4928	9.97543	10.6626	10.5466	10.5242	10.0138	9.7966	10.1342	10.6266	10.2014	11.0622	10.7464	10.7701	10.6404	9.48904	9.93923	9.40331	10.3842	11.4513	10.7775	10.3691	10.0429	9.75308	9.94977	10.339	10.3946	10.2121	10.1998	10.0864	10.5554	10.75	10.8057	10.064	9.75868	9.86887	10.1489	10.3429	12.0046	10.9382	11.1945
TUA6	AT4G14960	AT4G14960	10.2245	10.4929	11.1413	9.66321	9.4024	9.3066	11.2759	10.7984	10.4596	10.9625	10.2851	10.9162	9.99714	10.632	10.2934	11.3347	10.6171	11.2136	11.1643	10.804	11.1767	10.3289	11.1004	10.2764	10.6541	10.2568	11.3718	9.5758	9.99009	9.3181	9.42876	9.78787	9.34661	9.65157	9.65501	9.44791	10.1019	11.2174	11.0912	10.4922	10.3159	10.4875	10.6024	10.9562	11.2271	11.0438	11.2577
SIR	AT5G04590	AT5G04590	10.4491	10.739	10.5266	9.82024	9.79499	9.00064	10.6828	10.5514	9.97801	11.1334	11.6808	10.8091	10.2549	10.289	10.1503	10.9702	10.2956	10.8869	11.7035	11.7846	11.5465	10.4551	11.0391	10.0291	10.716	10.8916	10.8591	11.0314	10.5625	10.6058	9.94142	10.7376	9.745	10.7566	10.94	9.98839	11.4804	10.7029	10.7848	10.63	10.3193	10.5099	10.6052	10.5999	11.1165	11.0357	11.2123
PIP1;4	AT4G00430	AT4G00430	11.884	11.9281	11.8394	12.6056	12.6793	11.6359	10.9624	10.7799	11.1058	11.2528	11.4571	10.7898	11.0914	11.0452	10.8515	11.4107	10.803	11.1338	11.8732	11.9751	11.2887	10.6552	11.5792	10.8832	11.2952	11.013	11.2375	11.4183	11.0877	11.7779	12.1871	11.9191	11.1155	11.2078	11.1902	12.1111	11.376	11.6936	11.6945	11.5205	11.396	11.1256	11.5447	11.2749	11.3459	11.6946	11.9896
AT2G17360	AT2G17360	AT2G17360	9.77754	9.92315	10.9221	9.17872	9.38212	8.74665	9.87518	9.95945	9.4892	10.6861	9.94557	10.6296	9.96902	10.0894	10.1819	10.6306	9.80454	10.9533	10.7559	10.5813	10.7643	9.77709	10.3932	9.46962	9.9873	10.6191	10.9955	9.98703	9.44587	10.2458	9.29418	9.91474	10.0136	9.51574	9.6993	9.93988	10.2151	11.2591	10.9969	10.6267	10.1996	10.579	10.3554	10.6563	11.8303	11.2103	11.1382
RPL24A	AT2G36620	AT2G36620	9.8923	10.3457	11.5142	8.8934	9.31093	8.4213	9.46443	9.84583	9.25424	11.3248	10.0998	11.0715	9.75952	10.0784	9.71219	11.1063	9.89374	10.9543	11.3031	11.1589	11.3097	9.37865	10.3812	9.24711	10.3633	10.7519	11.2951	9.48718	9.3501	9.48114	9.05574	9.74852	8.53874	9.41001	9.51191	9.63474	9.90533	11.3009	11.0031	10.3099	9.74853	9.86273	9.99069	10.3234	11.2615	11.2304	11.2397
AT5G61170	AT5G61170	AT5G61170	9.96562	10.2708	11.5391	8.92567	9.31949	8.57417	9.82618	10.0021	9.51072	11.3269	10.3451	10.9928	10.0156	10.2011	10.0109	11.1878	10.1762	11.0893	11.4419	11.4051	11.4482	9.58883	10.6882	9.29111	10.6035	10.8282	11.4315	10.0369	9.44052	9.87542	9.42277	10.001	9.53815	9.5262	9.77694	9.91751	9.7312	11.1171	10.6779	10.2885	9.4591	9.81155	9.83059	10.2026	11.1613	11.0589	11.108
AT2G43530	AT2G43530	AT2G43530	7.8263	8.12377	7.48765	7.03668	7.41184	6.4038	6.37119	6.28503	6.68665	11.124	11.4776	10.8732	9.85276	8.81629	7.27913	9.99504	9.06255	9.19448	11.7154	11.8443	11.4738	10.7407	11.7015	9.32732	11.1052	10.8966	10.2025	8.84387	9.09226	9.74706	7.23869	7.43842	6.06298	9.65566	8.90735	8.76124	8.98032	7.76239	8.07941	8.92233	8.51894	8.16699	7.84254	6.87529	7.04351	7.87612	8.21551
AT1G74730	AT1G74730	AT1G74730	11.2091	11.3345	11.5005	8.92035	9.31093	8.8385	9.93983	8.97546	10.2623	11.8149	11.6136	11.5404	9.71054	10.5166	9.81271	10.262	10.1699	9.95821	11.5915	11.3196	11.4307	9.42259	10.4745	9.53019	10.4143	9.0748	10.2998	10.9443	10.9406	10.2243	8.74134	9.30892	8.08779	10.8765	10.8288	10.4628	11.3902	11.5165	11.6043	10.7907	9.9211	10.1544	10.4212	10.6755	10.1845	11.5373	11.7239
GolS1	AT2G47180	AT2G47180	8.21104	8.78351	8.01141	7.62668	7.39574	8.17176	7.48433	7.99092	8.01026	9.83649	11.2773	10.4712	8.63867	8.35508	7.76231	8.47103	8.35268	8.78106	11.7698	12.136	11.3621	11.1229	11.1408	9.17306	10.488	10.048	9.48494	9.4575	9.99131	9.03645	7.30531	7.26337	6.97744	10.8047	9.15099	8.95187	8.62949	7.90055	8.19851	8.52679	7.72259	8.44159	7.89262	7.20277	6.09218	7.83941	8.01862
AKR2	AT4G35450	AT4G35450	11.4682	11.5275	11.6053	10.4031	10.4614	10.2928	10.8916	10.3986	10.9064	11.6833	11.7234	11.4013	10.9031	11.1226	10.6329	11.0742	11.0109	10.9365	11.3944	11.3244	11.2213	10.5947	10.9799	10.4773	10.9296	10.1335	10.9285	11.5647	11.3213	11.5745	10.6139	10.6181	10.5628	11.1816	11.4083	11.4189	11.6847	11.7342	11.8705	11.3704	11.0139	10.9609	11.2373	11.2272	11.2226	11.6205	11.8006
SCO1	AT1G62750	AT1G62750	11.729	11.7938	11.3941	8.65756	8.67378	9.25515	9.93983	9.26955	10.2707	11.5421	11.7261	11.0183	9.34086	10.2811	10.2006	10.4136	10.0571	10.1711	11.2596	11.3583	10.9599	10.0109	10.3715	9.80925	9.99186	9.03365	10.1916	11.4659	11.0205	11.0788	9.13846	8.9757	7.77116	11.1683	11.2641	10.7533	11.5083	11.5651	11.4155	10.4184	10.1358	10.5204	10.4297	10.7693	10.5427	11.5639	11.8364
AT5G59850	AT5G59850	AT5G59850	9.98691	10.3736	11.5411	9.25267	9.80417	8.97196	10.0951	10.1825	9.57683	11.1473	10.2753	10.9188	10.4052	10.2684	10.126	11.2862	10.3652	11.1837	11.3336	11.4036	11.3155	9.84785	10.8282	9.60182	10.8274	10.8422	11.4239	10.0145	9.33093	9.74706	9.47868	9.99958	9.24917	9.40516	9.78518	9.6827	10.0031	11.213	10.7796	10.5949	10.0813	10.2649	10.3217	10.5289	11.2131	11.0634	11.2622
AT1G09590	AT1G09590	AT1G09590	10.0867	10.2895	11.4409	9.52961	9.8492	9.51978	10.3315	10.6846	9.87667	11.073	10.2876	10.8787	10.579	10.4616	10.36	11.2871	10.602	11.3147	11.2454	11.2926	11.2489	10.2013	10.7951	9.92549	10.9093	11.4479	11.5754	10.2453	9.79546	10.1498	10.1204	10.4111	9.76966	9.89693	10.0485	10.141	9.74167	10.9008	10.6305	10.3955	10.1542	10.2664	10.4663	10.4764	11.3584	10.9603	10.9784
AT4G27652	AT4G27652	AT4G27652	11.7882	10.329	6.97045	7.33785	7.63396	6.98895	6.84391	7.46063	6.34711	10.8285	12.6241	11.0009	10.0119	9.23251	8.92396	6.40781	6.51726	7.14152	10.5661	11.6068	10.6169	7.7233	6.55771	7.20275	5.8937	7.69365	6.06235	10.8131	11.2301	9.41812	7.25227	7.13703	7.70878	10.4074	9.98959	7.4605	8.39776	8.11634	6.54065	5.62187	5.46693	5.13433	5.73825	6.33141	5.49379	7.89859	8.15282
COL5	AT5G57660	AT5G57660	10.7145	10.5056	9.72221	11.0593	10.9654	10.8669	10.1218	10.4669	10.0919	11.9093	12.7936	11.4826	10.7003	10.4783	10.0864	10.4842	10.9229	10.5465	11.4427	11.6282	11.1742	10.567	10.3347	10.6844	10.859	10.5421	9.91475	10.6773	10.6533	10.6866	10.4976	9.84495	8.07795	10.0885	10.6521	9.01411	11.5314	10.8887	10.8096	10.9437	11.0551	10.8168	10.6548	10.2691	10.0901	10.6357	10.7655
RGF9	AT5G64770	AT5G64770	10.7551	9.87605	8.5204	5.38028	4.92861	7.55096	8.56578	7.60467	8.48639	9.68115	10.7939	9.5858	7.61486	7.99323	9.47203	8.87297	8.64102	9.33999	10.4046	9.71801	10.8584	8.62614	10.2501	8.53234	10.0422	8.89071	9.32337	12.1322	11.4052	11.3849	5.20289	8.167	6.10233	11.1877	11.7115	11.5271	10.5826	9.99767	10.8083	10.2172	9.00371	9.41799	10.3008	9.27705	9.64565	10.1965	11.2945
CHLI1	AT4G18480	AT4G18480	10.4894	10.8801	11.5757	7.94276	8.68044	8.06716	9.61293	8.7509	9.74969	11.452	10.9657	11.2776	9.43158	10.0748	9.4669	9.98356	9.91369	9.84721	11.3078	10.9449	11.0515	9.2452	9.92443	9.06803	10.029	8.76737	10.1708	9.95079	9.99983	9.60781	8.24684	8.59067	6.4152	10.0172	9.96492	9.13539	10.8812	11.684	11.5682	10.5644	9.8169	10.151	10.3225	10.6569	10.4431	11.726	11.7239
CAD9	AT4G39330	AT4G39330	10.903	10.9972	11.1262	4.56815	5.24844	6.73952	7.13344	8.47332	10.0871	10.6755	9.84279	10.7532	6.88781	9.08376	9.44096	10.1729	9.30486	9.8248	9.35941	8.21088	10.9027	7.13693	9.40459	8.18303	7.47896	6.55928	10.4172	11.0553	11.4958	9.10867	5.93308	5.19778	4.9878	10.9915	11.44	11.222	11.4404	11.5104	11.2532	10.4085	8.93601	9.5627	9.97176	10.8515	9.47152	11.2847	11.3104
TRXF1	AT3G02730	AT3G02730	11.1786	11.0239	10.5326	8.60538	9.25849	9.06725	9.2057	8.58443	10.1796	11.4108	11.8111	10.9815	9.64569	9.82739	9.14573	9.44776	10.2862	9.12458	11.0069	11.0205	10.9214	9.31347	9.72054	9.49589	10.6102	9.13354	9.22583	11.7458	11.3905	11.4032	9.48732	9.52614	6.95612	11.3475	11.7041	11.523	11.4067	10.8602	11.1611	10.1712	10.0119	9.80836	10.4542	10.4721	9.38443	11.0802	11.6441
CML37	AT5G42380	AT5G42380	8.3779	6.24071	4.93194	7.13197	7.72697	8.92484	6.5162	7.81068	6.43977	7.46039	7.95226	7.53597	8.8712	5.66098	7.59361	4.82131	5.27173	7.20237	6.03414	6.06703	5.81747	7.50711	4.44745	7.72116	4.8537	12.4537	6.02803	3.86343	6.15356	2.74316	6.20841	6.19707	8.01748	4.42605	3.81296	2.27491	5.89902	5.41115	4.54003	5.0637	6.70312	6.28845	7.15544	6.20106	6.13604	3.68411	2.96199
PIP2E	AT2G39010	AT2G39010	11.6696	11.7304	11.269	10.5959	10.4844	10.2974	10.9813	9.97585	10.9359	11.6694	11.8347	10.9649	10.3082	10.2795	9.96791	10.967	10.8791	10.7622	11.7231	11.6843	11.4344	10.0772	10.9574	9.90603	11.1364	10.4191	10.55	11.0252	11.2316	10.968	9.01651	9.40061	6.61888	10.8671	11.0594	11.1829	11.4449	11.4747	11.5358	10.7199	10.6165	10.4415	11.2866	10.8196	10.8774	11.0281	11.3068
AT1G14250	AT1G14250	AT1G14250	6.77741	8.165	6.3673	4.77124	4.8362	5.01055	5.43927	5.19857	6.55474	11.0318	10.999	11.3756	8.18347	7.40795	5.62635	8.71023	8.16576	7.47867	11.8059	10.9375	12.1735	8.57142	8.06571	7.40112	9.45118	8.75202	8.80896	6.95609	9.15682	5.25327	3.94672	2.99347	5.14682	9.99268	7.0426	7.19714	8.13748	8.92774	7.74349	6.74705	6.04966	6.12011	7.2701	7.86349	6.1786	10.3282	9.72635
TIFY10B	AT1G74950	AT1G74950	8.00387	7.91176	7.07239	8.14819	7.39574	9.03433	7.32282	7.12056	7.67116	11.8603	12.949	11.5144	9.2534	7.3726	7.80361	9.49412	9.96899	9.79658	9.76729	9.70196	8.49109	9.16985	9.24958	8.16858	9.314	9.3384	8.42317	8.03446	8.77524	7.55598	7.48848	7.57964	8.09756	8.88218	7.60228	8.09999	8.68746	7.12951	7.33381	7.35886	7.87497	7.52964	7.38905	7.27583	7.20149	7.54101	7.13453
TSB1	AT5G54810	AT5G54810	8.29688	8.11778	8.31852	9.52259	9.76083	10.374	11.1961	11.2132	9.81169	9.81724	9.94557	9.54875	9.87516	9.82957	9.93669	10.7967	10.2225	11.059	10.9285	10.7854	10.4647	10.2246	10.9695	9.74985	10.7413	11.1719	11.0673	8.83364	8.49775	8.94473	8.82545	9.70807	10.8896	8.70154	8.73083	8.65406	9.11719	8.60285	8.93314	10.1144	9.99486	10.4332	10.3431	10.2094	11.0221	8.70705	8.57717
UBQ14	AT4G02890	AT4G02890	11.5602	11.5867	11.6982	10.9745	11.2197	11.3294	10.3225	10.7432	11.2882	10.2821	10.7278	10.4979	10.5143	10.4532	10.3806	9.80528	10.2163	10.0857	10.2308	10.4843	10.4503	10.9631	10.2329	10.9523	10.6548	11.3631	10.1363	11.8558	11.1382	11.2741	10.7227	10.5831	11.0096	11.1825	11.4034	11.9255	12.0289	11.3592	11.3267	11.3583	11.5055	11.2903	11.224	11.2635	10.7689	10.9826	11.3605
AT1G70780	AT1G70780	AT1G70780	9.54535	9.05505	10.4136	11.8648	11.964	12.1166	10.3582	10.8315	10.6719	11.3194	11.8654	11.3479	11.5615	10.1252	10.2037	10.6584	11.0503	10.8931	11.7045	12.0015	10.7215	10.4323	11.5104	10.967	11.2813	11.5073	11.1904	9.75322	9.67901	9.5205	10.8307	11.3223	12.0572	9.44349	9.6993	9.21704	9.58345	10.0201	10.1867	10.1748	10.5812	9.91314	10.0207	10.5619	10.2626	9.44461	9.65577
PFL	AT1G22780	AT1G22780	9.94885	10.0242	11.4593	9.64717	10.0451	9.11526	10.5613	10.9284	10.1661	10.9799	9.83109	10.838	10.4356	10.3675	10.4602	11.1397	10.1914	11.2295	11.0226	10.9595	10.9003	9.95646	10.6356	9.77152	10.4287	10.9408	11.4195	9.59713	9.16982	9.69014	9.33302	9.91622	9.11612	9.18526	9.39674	9.65291	9.43663	10.9167	10.6997	10.7437	9.997	10.4728	10.3041	10.5499	11.5213	10.8365	10.9061
AT3G20390	AT3G20390	AT3G20390	9.91222	10.2158	10.5986	8.66395	8.94113	8.51972	8.91004	9.07396	9.57342	11.617	11.9109	11.5515	9.55779	9.2456	9.65014	10.0095	10.1519	9.4831	12.0344	11.703	11.6118	9.70775	10.8326	8.91203	10.9225	9.99031	10.4982	9.51786	10.0251	9.1016	8.26033	9.20858	7.24694	10.0692	9.82913	9.67086	10.216	10.2391	10.2967	9.88604	9.36259	9.79874	9.83525	9.89835	9.31697	10.659	10.4688
HDR	AT4G34350	AT4G34350	11.7962	11.7872	11.4577	10.7645	10.5801	11.0316	10.9577	10.7516	10.9764	11.6303	12.0533	11.149	10.2841	10.1323	10.0713	10.2101	10.6449	10.0955	11.3487	11.4981	10.974	10.2699	9.98116	10.5063	10.6741	9.82191	10.1747	11.7441	11.4596	11.1564	10.817	10.2432	10.5976	11.4874	11.4888	11.2138	11.731	11.5371	11.5822	10.2155	10.5428	10.1998	10.4343	10.8725	10.2896	11.3449	11.5402
ndhI	ATCG01090	ATCG01090	10.9958	11.3097	11.047	8.57179	8.16715	9.15152	9.37057	8.6876	10.2749	11.3262	11.1425	10.8787	9.40104	9.59149	9.35745	10.2181	10.1298	9.60705	10.9269	11.4278	11.0558	8.66846	10.5779	9.0125	9.86954	9.3428	9.7018	10.6916	10.8296	10.8765	7.06502	8.167	6.86754	10.5879	10.5781	10.4765	11.6948	11.392	11.6472	11.1057	10.2346	10.6485	10.7474	11.1216	9.69138	11.6853	11.6281
RPL4	AT1G07320	AT1G07320	11.1651	11.3045	11.8342	7.41566	8.00682	7.90667	10.1331	9.45059	9.99083	11.4853	11.0079	11.3601	9.21241	10.191	10.0091	10.9462	9.91369	10.679	11.1036	10.7766	11.0371	9.44407	10.3932	9.31754	9.68888	8.73872	11.0976	10.1443	10.339	9.86573	7.33112	7.77505	6.47639	10.1841	10.1349	9.66042	10.4628	11.36	11.0747	10.5962	9.42923	10.1867	10.2228	10.3855	10.6647	11.5699	11.5049
ILL6	AT1G44350	AT1G44350	5.78655	5.31508	5.06979	7.5038	7.4745	8.41279	7.36811	6.8977	5.6669	11.4451	12.2856	11.0578	9.38125	7.32407	7.61233	9.88824	10.1271	10.0512	11.3754	11.6409	10.3579	9.34316	10.9751	8.62518	10.7648	10.5649	10.2424	5.9268	7.1214	6.27934	6.12234	7.36226	8.3225	8.06185	6.07039	6.91544	7.18492	5.92449	5.68251	6.698	7.87497	6.59553	7.02272	5.84723	7.56452	5.6577	5.92788
AT5G57345	AT5G57345	AT5G57345	11.6083	11.2952	10.9618	9.75588	10.1327	9.40859	9.62897	9.2393	10.4127	11.552	11.8221	10.9135	9.91501	10.2748	9.31523	8.93499	9.70064	8.74742	11.5287	11.6824	11.4184	9.49787	9.64027	9.65719	10.5681	8.9687	9.32573	11.4926	11.1955	11.1851	9.79378	9.51836	8.46518	11.1712	11.3448	10.9145	11.1109	10.7179	11.0249	9.94399	9.15544	9.44154	9.13991	9.81278	8.79469	10.3898	10.9334
EXT3	AT1G21310	AT1G21310	6.02475	6.9558	4.83213	10.4426	10.492	11.3849	8.72844	8.2008	9.16204	3.49474	3.86732	2.91518	10.6314	9.05059	8.86275	4.16791	8.2789	4.71711	4.30439	4.2513	4.04544	10.6259	6.25523	10.6742	10.9862	10.1503	8.33703	3.86343	3.84163	7.01996	6.18029	6.68785	5.4203	4.86315	4.40846	3.63188	5.72013	6.64408	6.07491	9.58788	12.2529	11.5967	9.75999	9.46913	7.83449	3.30779	3.81884
BGAL1	AT3G13750	AT3G13750	9.82822	9.41137	8.72556	10.3306	9.1475	9.89159	12.381	10.2649	9.76768	8.22762	8.88021	9.43888	9.22832	9.8808	9.79848	9.60864	8.9571	9.66705	7.86339	6.74365	8.15745	8.16143	8.61302	8.44515	8.95376	7.95357	9.19652	6.64105	7.93774	6.72144	6.509	5.7952	3.91573	7.35538	7.31404	5.49644	8.96031	9.53445	9.96247	9.68925	9.25558	9.64615	10.8262	9.89414	11.0457	9.64004	9.22113
AT5G23820	AT5G23820	AT5G23820	7.12337	8.32945	9.92053	5.38028	6.44534	4.71065	6.0284	8.71227	7.49521	11.0065	11.1096	11.8361	7.72658	7.08287	7.89051	9.53903	9.01506	9.0456	11.7642	11.3155	11.7829	9.03077	11.0269	8.01558	10.4295	9.8198	10.2229	7.11663	8.6815	7.71866	5.71519	7.32708	4.49102	8.13395	6.82227	7.12087	8.13351	8.76601	8.08369	8.16468	6.99688	7.61982	7.29739	7.28229	6.48026	9.93356	9.64897
AILP1	AT5G19140	AT5G19140	11.5712	11.0239	9.02016	11.8226	11.5675	12.2245	11.3917	11.5148	10.875	10.8897	12.1066	10.7473	12.1631	11.7861	10.9272	10.1243	10.972	9.83871	10.9335	11.3236	10.7525	12.3921	10.1118	12.75	11.5372	10.98	8.76796	10.9743	11.3601	11.2799	11.9794	10.5813	10.6062	11.0334	11.2586	9.97521	11.5565	10.2666	10.5173	11.1132	11.8511	11.5165	10.8848	9.94797	9.16782	10.4663	10.8898
AT1G56220	AT1G56220	AT1G56220	10.3171	9.35395	8.88037	10.3144	10.522	9.77355	9.96847	10.5041	9.30849	8.49327	9.43151	9.73572	10.3466	10.5166	9.84472	7.77812	8.31626	8.12793	9.08424	8.91884	9.89212	9.54122	8.24056	9.83234	9.10881	8.21912	7.61962	11.0662	11.7297	11.7853	11.6028	10.6986	10.9366	11.035	11.4445	12.049	11.247	10.1347	10.372	10.8202	10.2052	10.541	8.50356	9.11996	7.91222	9.64536	9.86382
ACT8	AT1G49240	AT1G49240	11.2884	11.2946	11.1209	11.4737	11.3148	11.2288	11.5475	11.582	11.4324	10.3916	10.5779	10.3491	11.0845	10.9948	11.3326	11.376	11.3846	11.1825	10.0669	9.78982	10.2341	11.1324	11.2881	10.9182	11.3593	10.5662	11.1182	10.1841	10.5642	9.92826	9.79378	10.376	10.4605	9.99375	10.2068	10.2415	10.6014	10.7621	10.932	11.2287	11.1699	11.3156	11.4818	11.5116	10.9803	10.5581	10.5031
CDC48	AT3G09840	AT3G09840	10.6147	10.4506	10.6924	11.5974	11.2559	12.0043	11.8445	12.0511	11.5083	10.3772	10.6086	10.5526	11.1726	11.5794	11.5737	11.5414	11.5594	11.7594	10.4525	10.3873	10.4357	12.0967	11.6145	12.1119	11.2823	11.5545	11.3894	10.8749	10.756	11.054	11.4463	11.3905	11.798	10.9703	10.8559	11.1651	10.2056	10.3757	10.5038	11.1114	11.2521	11.3862	11.1117	11.0434	11.1247	10.3601	10.0178
ELI3-1	AT4G37980	AT4G37980	11.2769	10.7574	10.4092	8.12983	8.41889	9.6985	9.20926	9.82108	10.4924	10.7525	11.1041	10.2115	8.28429	8.04655	8.2898	9.82647	9.10052	9.47078	10.7427	10.3371	10.4487	8.10091	9.81987	8.3964	8.97235	8.6059	9.38115	11.3722	11.437	12.1154	9.80993	10.223	7.50363	11.1891	11.5338	11.7761	10.2998	10.7438	10.771	8.94353	9.1783	8.34794	9.26616	9.93573	9.1875	10.803	11.2681
AT2G32150	AT2G32150	AT2G32150	7.92763	7.81146	6.3673	9.68537	9.88712	11.9684	8.47996	9.45936	8.57077	12.1034	12.8558	11.5188	9.43707	7.87187	8.52033	9.58258	10.2384	9.31724	9.40004	8.97126	8.33214	9.49199	8.06571	9.97198	9.53796	9.51385	7.34551	8.44734	9.26379	8.89386	9.53529	8.68052	8.62233	8.8373	8.09064	8.38002	8.59817	7.63091	6.94011	8.17547	8.99729	8.83375	7.78103	7.19594	6.53861	7.37139	7.40584
TIM	AT2G21170	AT2G21170	11.3129	11.5532	11.6911	8.92035	9.24956	8.7193	9.55395	9.39375	10.521	11.7278	11.423	11.6346	9.83001	10.4	10.6556	10.3924	10.3188	10.2864	11.3807	11.143	11.3146	9.96497	11.0106	9.74011	10.3694	9.55489	10.6901	10.8163	11.0013	10.4458	10.0406	10.2537	9.45319	11.0081	10.8951	11.001	11.1159	11.4595	11.5773	10.8248	10.0609	10.6977	10.1959	10.7624	10.5376	11.6302	11.6868
F3H	AT3G51240	AT3G51240	9.83084	10.4169	10.8914	8.0637	8.94113	7.25967	7.64016	8.07705	8.96825	7.57487	7.711	7.72903	6.56605	6.64292	7.00946	7.52514	7.29268	7.14152	7.08821	7.22333	7.28993	6.8364	7.54407	6.8693	6.66171	5.89167	8.44717	9.5018	8.73497	10.2014	11.9861	12.8394	10.1537	9.91409	9.22904	11.2072	8.88915	8.76842	9.15452	8.51834	7.03913	7.77617	7.97945	8.23394	8.21024	9.15457	8.76074
ATCG00820	ATCG00820	ATCG00820	12.0695	12.5355	12.2625	9.46153	9.92407	9.44244	9.68757	9.97381	10.8012	11.7488	11.1746	11.873	9.91108	10.2277	10.2744	10.7901	10.32	10.5021	11.2029	10.9781	11.1757	9.64024	10.5957	9.45481	9.99186	9.64673	10.7484	10.1392	10.8465	10.6597	9.00853	9.73684	10.1537	10.8846	10.1201	10.5282	9.69128	10.4756	10.3876	9.791	9.19521	9.36101	9.46281	9.97814	9.13713	10.169	10.1536
AT5G02160	AT5G02160	AT5G02160	10.9591	11.2678	11.9447	8.1842	8.48886	8.30652	10.1199	9.10038	10.7096	11.4363	11.7494	11.3071	9.44253	10.0244	10.002	9.53617	9.32791	9.17268	11.0637	10.2726	11.3561	8.89032	9.5424	8.72727	9.3357	7.79989	9.13067	8.22659	10.3079	8.88018	5.86404	6.27298	6.8902	9.39541	9.32747	8.76124	10.9046	11.603	11.2346	10.8598	9.67139	10.2127	10.0166	10.7367	10.0936	11.255	11.2988
emb1138	AT5G26742	AT5G26742	11.0109	11.0827	11.2944	8.75058	9.01149	8.56652	10.0089	9.34092	9.79717	11.1114	10.9364	10.6834	10.4614	10.9634	10.8186	11.1763	10.3507	11.0411	10.464	10.364	10.6822	10.2989	10.9799	10.2039	10.2383	9.70029	11.2116	11.221	10.6679	11.4213	10.0347	10.3357	10.4997	10.8829	10.9744	10.7113	11.1438	11.3774	11.2622	10.9166	10.5324	10.6762	10.7955	10.6859	11.3834	11.3745	11.375
AT1G23710	AT1G23710	AT1G23710	10.8511	9.97541	7.55181	8.34398	8.52631	9.95452	8.4917	8.96728	7.87298	8.27919	8.637	9.13457	8.98791	8.24208	8.14306	6.89167	7.24504	8.24182	8.45094	8.49493	8.23439	8.4493	6.21254	8.8318	6.61516	12.4022	6.75039	9.26721	10.1186	7.62983	8.09694	7.51857	9.40286	9.24074	8.98507	7.53424	8.94228	8.49936	7.92598	6.83135	7.82755	7.37132	8.01687	7.1186	7.86739	7.78736	7.75722
ATCG00040	ATCG00040	ATCG00040	10.2045	11.2384	12.3564	7.63971	7.75248	8.14117	8.60415	8.8297	10.2388	11.9237	10.9855	11.895	9.4908	9.42314	9.3685	10.4723	10.0613	9.68493	10.9391	10.8811	11.2452	8.6045	10.4297	9.14751	9.25829	8.4569	9.29118	10.0447	10.4849	10.3217	7.53364	7.95866	8.00715	10.1351	9.54419	9.8561	9.95899	10.9134	10.7038	9.50333	8.4796	9.54363	9.42309	9.53691	8.71199	11.342	10.2968
AT3G02560	AT3G02560	AT3G02560	10.1552	10.4047	11.4944	10.4012	10.6513	9.93978	11.0554	11.1844	10.4298	10.8486	9.90947	10.7165	11.0183	10.8297	11.2647	11.2683	10.5264	11.4424	10.9798	10.9847	11.0133	10.7043	11.2231	10.4861	10.6257	10.8851	11.5129	9.55571	9.23107	9.71039	9.45247	10.277	9.85853	9.25338	9.32101	9.69005	9.30703	10.8317	10.4419	11.01	10.0558	10.9181	10.3691	10.4869	11.2711	10.6431	10.6946
LTI65	AT5G52300	AT5G52300	3.16264	2.36602	3.47787	6.09897	6.96506	3.59301	3.67279	6.25847	6.02695	2.93287	3.21678	2.73496	3.57183	3.61153	2.96034	2.24352	2.32728	3.00988	2.45964	2.6204	2.8335	3.97846	2.87595	3.49032	3.00331	2.99186	2.60744	7.7269	6.65069	10.5991	9.82817	9.51836	11.3109	6.3504	6.85843	12.6826	2.25497	2.24104	2	2.44263	2.46417	2.87005	2.24398	3.03108	2.48007	2	2
CT-BMY	AT4G17090	AT4G17090	12.3804	12.2146	11.5172	9.75288	9.55516	9.7999	10.2203	9.0117	10.6332	11.0351	11.5482	10.5015	9.42608	9.44316	9.07327	10.3303	10.3972	10.34	11.1928	11.6121	9.93654	9.38501	10.7276	9.30438	10.803	10.551	9.90218	9.56502	9.38212	8.74774	7.27903	7.64538	6.28444	9.21142	9.41355	7.87595	11.4304	10.7432	11.1138	9.83704	10.1504	9.7205	10.9852	10.8274	10.8991	10.4946	10.925
DIC2	AT4G24570	AT4G24570	12.1398	11.2738	8.95937	6.06073	6.53626	6.43776	7.48433	8.81155	7.57909	11.3992	11.7927	11.7052	9.07843	9.29365	8.6618	7.69862	6.97992	8.62435	11.0692	11.2935	10.9238	7.13693	6.55771	6.30881	5.46545	9.53195	7.14664	10.3305	11.6787	6.24557	5.71519	5.31015	5.48128	10.1613	9.98653	5.7871	10.4956	10.3654	9.19064	5.57917	6.14559	5.654	8.60535	8.26037	7.95263	9.6387	9.86578
RING1	AT5G10380	AT5G10380	8.99259	8.76064	6.41982	10.4239	10.6799	11.6231	11.4459	11.0033	10.6861	7.72293	8.80361	7.23882	11.2486	10.2619	9.21777	8.8058	11.0579	9.62197	8.09879	8.55387	7.90788	10.5961	8.35293	10.4596	11.2832	10.8866	8.46224	8.42707	8.14071	8.46555	9.38631	9.11628	6.28444	8.24664	8.17909	6.83284	9.1685	8.29402	8.49981	10.1873	11.7076	10.7057	11.6911	10.681	10.4529	6.82268	7.49951
AT1G09640	AT1G09640	AT1G09640	10.049	10.096	10.7652	10.3585	10.2153	10.4938	11.1258	11.2457	10.6315	10.5575	10.1954	10.4039	10.6206	10.4131	10.6802	11.2828	10.9822	11.286	10.7502	10.8428	10.7374	10.3791	10.8466	10.2561	11.0455	11.1318	11.1994	10.2327	9.77716	10.2145	10.0425	10.4278	9.79989	9.97425	10.0058	10.204	10.125	10.8854	10.598	10.7467	10.7805	10.7923	11.2561	11.0902	11.4121	10.7668	10.6155
AT3G13120	AT3G13120	AT3G13120	10.5605	11.0247	11.9168	7.65262	8.10909	7.80625	9.3642	8.76983	9.78838	11.2246	10.9457	11.4027	9.27194	10.1393	9.82078	10.1793	9.68644	9.95428	11.0852	10.7647	10.9531	9.3168	10.2968	9.20172	9.3989	8.42405	10.5986	9.79206	10.2581	9.65037	8.0894	8.24447	7.19328	10.2396	9.91749	9.33428	10.5877	11.4301	11.2627	10.7736	9.75107	10.4159	10.2308	10.3085	10.6084	11.6719	11.5457
MIPS2	AT2G22240	AT2G22240	10.5238	10.2518	8.93552	6.4928	7.42776	8.03424	8.33433	8.86535	9.6912	8.11228	9.26511	8.40066	7.29061	7.68274	7.89816	8.56649	8.32086	8.12793	7.78211	7.9559	7.82572	7.92005	8.06571	7.48511	7.83432	7.16072	8.19477	11.426	11.7453	10.4698	8.84798	8.2632	6.61888	11.7144	11.4945	11.7632	10.6905	9.34413	9.54549	8.36965	8.49789	8.5878	9.45828	9.13074	8.5431	9.26768	9.60983
ENH1	AT5G17170	AT5G17170	11.237	11.0406	11.0827	8.90963	9.54425	8.62664	9.68374	9.11526	10.2916	11.0875	11.2693	10.8561	9.78125	9.82739	9.73157	9.4186	9.86093	9.52605	7.6855	6.95833	7.68479	7.70308	7.12786	7.97465	6.85439	6.12757	7.26922	10.8624	10.1594	10.6024	9.2909	9.29987	7.70878	10.8812	10.8053	9.31349	11.5367	11.3088	11.7486	10.3909	9.87869	10.0145	10.3803	10.6913	10.2601	11.3193	11.6757
PETE1	AT1G76100	AT1G76100	11.1421	11.3752	11.6157	8.51635	8.87299	8.85115	9.97267	9.39984	10.8499	11.6918	11.2568	11.6574	10.0993	10.7754	10.3669	10.5557	10.8594	9.85143	11.6182	11.3341	11.4052	9.95218	10.864	9.51884	10.9556	9.84691	10.3723	10.5275	11.2186	10.4253	7.7784	9.04229	8.2189	11.0033	10.9091	10.2683	10.9861	11.3399	11.1484	10.8994	10.3219	10.6592	10.33	10.8471	9.73481	11.7317	11.7607
GRF1 AT4G09000	AT4G09000	AT4G09000	11.1579	11.0734	11.176	11.841	11.6823	11.795	11.0294	10.8382	11.369	11.9906	12.1979	11.47	11.533	11.0994	10.9439	11.2492	11.6972	11.1618	11.7837	11.944	11.7271	11.0587	11.382	11.2059	11.6815	11.1915	11.1836	11.7231	11.2608	11.4089	11.1463	10.9368	10.4624	11.0869	11.45	11.414	11.2693	11.3166	11.5811	11.0295	11.2226	11.0062	11.2883	11.3286	10.8398	10.9667	11.1639
AT1G51200	AT1G51200	AT1G51200	12.2074	11.5041	10.6296	11.6065	11.7947	11.6359	11.6685	11.4078	11.07	10.5198	11.3755	10.3373	11.2772	11.3563	11.088	11.2858	11.0579	11.1155	10.4563	10.7534	10.4679	11.2275	11.3092	11.2925	11.175	10.8071	10.6713	11.8932	11.2608	12.2999	11.3207	11.3516	11.8838	10.8266	11.4434	11.9661	11.3768	10.5978	10.6623	11.4869	11.4884	11.252	11.6294	11.0175	11.1536	10.4282	10.8558
AT5G56670	AT5G56670	AT5G56670	10.285	10.3898	11.7916	9.701	10.1279	9.32939	10.4156	10.6156	9.92556	11.416	10.6027	11.2584	10.4205	10.4546	10.2788	11.2562	10.4931	11.2087	11.3988	11.3673	11.3327	9.89985	10.7724	9.76433	10.7561	11.1009	11.4414	10.1982	9.70604	10.1418	9.73458	10.0824	9.43018	9.58454	9.97731	10.0503	9.54364	10.756	10.5385	10.1385	9.61106	9.8232	9.84222	10.0901	10.8118	10.816	11.0114
CZF1	AT2G40140	AT2G40140	9.65876	8.77593	7.46283	8.76848	8.87299	9.86998	8.68563	9.56881	9.04891	8.30153	7.97673	9.06231	9.32911	8.21571	8.78652	7.83034	8.31626	9.02141	8.45403	8.45426	8.38034	9.03886	7.61134	9.1215	7.69019	12.4019	7.8334	7.67626	9.39325	6.17557	8.42517	8.29085	9.71675	8.32402	7.88248	6.38833	8.71692	8.68674	7.8477	7.50861	8.57457	8.37984	9.1881	8.83795	8.91127	7.24376	7.02679
ANNAT4	AT2G38750	AT2G38750	6.37981	6.98241	7.29491	4.86298	5.09737	6.79298	5.33884	4.8169	6.55474	11.5509	11.8873	10.7854	7.77936	6.09621	7.02351	9.7729	10.1285	9.50876	11.6275	11.5949	11.119	8.81224	10.8939	7.37619	11.1073	10.4981	9.75871	8.77334	8.91824	7.89782	5.59251	6.72887	5.53978	9.27125	7.89123	8.14347	8.27708	8.22555	8.28645	7.13391	6.97093	5.57604	7.19951	7.44665	6.21994	8.2317	8.28731
SVL2	AT1G66970	AT1G66970	10.8224	10.8001	10.3819	10.1305	9.78884	10.2336	10.7467	10.0377	10.9333	10.7786	10.3684	10.8394	10.8227	10.363	10.7206	9.88824	11.0838	9.6979	10.0475	9.61896	10.3142	10.7257	8.91878	10.4948	10.6804	9.80606	9.34444	9.21692	9.64371	8.79227	9.08637	9.51054	5.89387	9.60018	9.37818	8.79981	11.5988	11.2245	11.6129	10.6462	11.4253	11.0733	11.2119	11.9017	10.6693	10.4134	10.5144
DMR6	AT5G24530	AT5G24530	10.501	10.3635	9.75495	10.9498	10.9627	11.7159	10.0864	10.2847	11.4958	9.05984	8.70084	8.61464	11.1914	10.0301	10.2759	8.27601	10.913	8.54825	8.05468	7.15969	8.39046	11.1437	8.47083	10.5981	10.784	10.6113	8.43195	6.60541	7.08525	7.44878	10.7457	9.55303	9.69761	6.84633	6.80384	7.73522	9.51038	9.66039	9.26217	10.2294	11.9774	11.5449	10.6874	11.4527	9.22859	6.39954	7.10834
PCAP1	AT4G20260	AT4G20260	11.6761	11.6404	10.6906	12.8505	12.8879	13.6318	11.544	12.16	11.2037	10.8486	10.871	10.1898	11.7413	11.7816	11.0635	10.4206	10.2002	9.99498	10.3417	10.237	10.118	11.5239	9.85152	12.326	9.92903	10.3573	8.92539	10.3168	9.77006	11.3296	12.4989	11.0584	11.8299	9.65021	10.1989	10.8145	10.934	10.6991	10.8128	10.6188	10.6234	10.7022	9.80941	9.28993	9.83716	10.3065	10.4828
LQY1	AT1G75690	AT1G75690	11.2161	11.4426	11.6208	7.72776	7.78992	7.16146	8.77723	8.04632	9.96507	11.7314	11.584	11.3818	8.39553	9.28734	8.97547	8.72535	8.8175	8.62435	11.2997	10.7789	11.0778	8.23369	8.94183	8.26678	9.23731	7.47055	8.93468	10.0536	10.6006	9.44254	7.13994	7.34478	6.06298	10.2983	10.3375	9.71909	10.8657	11.1885	11.1444	9.63556	8.70887	8.84833	8.52969	9.93982	8.56933	11.2449	11.6401
AT2G09990	AT2G09990	AT2G09990	10.4285	10.4649	11.5796	10.2265	10.3981	9.70548	10.6458	10.8704	10.2366	10.9243	10.3404	10.6981	10.5653	10.6005	10.6857	11.0713	10.4124	11.3893	11.2867	11.4131	11.1456	10.3056	11.0618	9.97198	10.6139	11.4951	11.4239	10.2965	9.77716	10.1914	9.93722	10.4818	9.31346	9.74917	10.0178	10.2445	9.45741	10.359	10.1596	10.0985	9.53191	9.94256	9.87202	10.0799	11.1158	10.1992	10.2675
APG1	AT3G63410	AT3G63410	10.9289	11.1495	11.2785	8.51635	8.84954	8.47952	9.59399	8.92146	10.1061	11.2798	11.2828	11.1596	9.48552	10.2178	10.0848	10.1948	10.0899	10.0401	11.1031	10.9564	10.9185	9.52979	10.3396	9.39092	10.1815	9.09407	10.4591	10.8573	10.7845	10.3948	8.99245	9.20374	7.70878	10.9145	10.8753	10.5742	11.1063	11.4148	11.4205	10.8265	9.99379	10.5877	10.4827	10.8235	10.8612	11.6171	11.748
AT3G06355	AT3G06355	AT3G06355	11.2241	11.3695	12.0828	11.8731	11.8933	10.8669	11.3186	11.8874	11.4286	11.7107	10.6661	11.4312	11.1326	10.7237	10.916	11.4339	10.6954	10.8103	10.5923	10.8304	11.3462	10.5459	10.72	10.2646	10.7814	10.5073	11.1192	10.2365	10.4506	10.4477	10.3989	11.0691	12.7635	10.0662	10.3383	10.7414	8.32309	8.37211	9.22974	8.62453	8.25427	8.27887	8.47695	8.16217	8.04754	9.37418	8.49868
CSP41A	AT3G63140	AT3G63140	11.1187	11.3448	11.1308	6.27629	6.98672	7.61172	8.35697	7.53997	9.8088	11.3632	11.3858	10.9903	8.18347	8.88899	7.77066	8.68467	9.37956	8.36817	11.1434	10.8207	10.7174	8.14654	8.62934	8.32003	9.58401	8.0994	8.86024	10.3269	10.9002	9.80036	7.13994	7.25404	6.56356	10.7522	10.6617	10.1259	11.0289	11.1442	11.2	9.34027	8.70887	8.8421	9.4385	10.2412	8.92071	11.5983	11.6929
RAV2	AT1G68840	AT1G68840	10.7851	9.89542	7.89874	8.24515	7.96379	9.47959	8.44113	9.69551	8.44972	9.30899	8.35836	10.4199	8.85079	8.78973	8.47503	8.42546	8.70228	8.35632	9.2971	8.8056	9.28569	9.27289	7.1047	8.87692	7.23141	12.358	6.83221	7.32091	9.12601	6.37614	5.02457	6.19707	6.64577	8.18763	8.71365	4.31858	10.1449	9.7917	8.31944	8.10572	8.87668	8.71828	8.23019	8.19337	7.82448	9.25902	9.06306
SYP122	AT3G52400	AT3G52400	9.80177	8.89273	6.97045	9.34704	9.23606	10.2788	8.46515	8.7604	8.47913	9.28956	9.90947	9.37295	10.3187	8.93416	9.34631	7.81629	8.77788	8.81176	7.96654	7.56642	7.80569	9.42876	6.29669	10.0646	7.31388	12.3749	7.01851	7.11663	8.27114	5.14754	7.45366	7.16718	10.0162	6.68503	6.91104	4.69104	9.1411	8.51378	7.67714	7.80578	9.24118	8.99971	8.62164	8.15867	7.81101	6.32183	6.80011
AT4G19200	AT4G19200	AT4G19200	11.4246	11.3293	10.4676	11.2709	11.3715	11.8242	10.2379	9.57151	10.6233	11.7376	12.3512	11.1955	12.0892	11.1191	10.9504	10.7543	11.1507	10.7247	11.1974	11.3248	10.9347	11.447	11.0975	11.9237	10.9014	10.6009	10.0262	11.0847	10.8452	10.6692	10.5118	10.3312	10.229	10.7985	11.0151	10.868	11.1384	10.8703	10.7789	11.608	12.1615	11.5908	10.9345	10.4932	10.4887	9.92482	10.887
HSP70	AT3G12580	AT3G12580	11.0039	10.4649	11.5152	9.09132	9.4024	9.7228	9.38953	10.2548	11.4333	7.73118	9.07416	6.87508	9.43707	8.72579	9.50746	9.71978	11.3753	10.092	8.25224	9.89994	8.67622	9.80106	9.61181	9.47256	10.4185	9.97054	9.43671	11.3589	10.4533	11.8006	11.0339	11.9541	11.8196	10.3597	10.7671	11.9509	8.24066	8.71947	8.93314	8.66338	9.16692	9.09537	10.8926	11.215	9.46831	7.16437	7.96854
AT3G51730	AT3G51730	AT3G51730	10.7551	10.2228	9.06482	12.3888	12.4334	13.1346	11.662	12.0326	10.9372	9.0166	10.0269	9.06469	10.8185	10.2668	9.73157	8.81053	9.73898	8.9224	8.89026	8.97332	8.8054	11.2052	9.07589	11.9408	9.92784	9.805	8.44067	11.1972	10.7596	11.7083	11.8143	11.2981	11.1071	10.7291	10.9878	11.4943	10.8331	9.7642	10.2005	10.5164	11.1245	10.9289	10.8638	9.84806	9.57273	9.74424	10.073
CYP83A1	AT4G13770	AT4G13770	9.93187	10.3898	7.76304	8.7744	8.9244	6.59652	9.86394	7.75476	7.29477	9.85926	11.292	9.4984	9.74633	9.30932	8.12363	10.8215	9.89837	10.5215	10.2442	10.819	10.6739	9.10585	9.85673	8.83638	10.562	9.56371	10.5174	11.5362	10.6571	10.7602	8.74614	10.3055	6.28444	10.9449	11.456	10.6762	11.5329	8.62694	8.90925	9.76026	9.64974	9.64853	10.9247	9.06292	10.6883	9.9754	10.4402
AT5G23900	AT5G23900	AT5G23900	10.0377	10.1036	11.2168	9.35496	9.53693	8.8946	10.6873	10.8472	9.84313	10.727	9.99283	10.6352	10.193	10.3001	10.4972	11.0539	10.328	11.371	10.7546	10.9088	10.8296	10.2263	10.5957	9.96154	10.3222	10.9292	11.269	9.75051	9.64371	9.78722	9.32019	9.59431	8.9318	9.54982	9.70428	10.0038	9.51801	10.7837	10.3402	10.3034	9.51554	10.2508	10.2175	10.1681	11.4975	10.7619	10.7012
RPT2	AT2G30520	AT2G30520	12.1244	11.9315	10.9462	11.5772	11.2889	11.1529	11.4654	11.5604	11.3271	9.80556	9.81081	9.95501	10.5802	10.822	10.5308	10.354	10.1006	10.0713	11.0242	11.1822	10.9729	10.717	10.1205	10.9214	10.4354	9.78466	9.51209	11.104	11.7027	10.6937	10.6642	9.91029	8.55301	11.1887	11.4216	9.94726	11.7483	11.6482	11.3584	11.152	11.1488	11.0927	10.5367	10.8821	10.2639	11.4353	11.5807
CML38	AT1G76650	AT1G76650	9.77482	7.94595	5.58102	7.32177	7.62017	10.3089	7.57542	7.74523	5.03576	11.5939	12.5168	11.7619	9.59261	8.22896	8.45961	7.05219	7.38349	8.08189	10.4579	11.2852	10.1241	8.29576	6.99562	9.3467	6.31371	10.358	6.57927	6.67584	8.58123	5.61242	6.18029	6.19707	6.91251	7.79656	7.05044	3.97776	8.21461	7.99818	6.09199	5.26572	7.72777	6.74552	5.15754	5.44808	5.49379	8.2067	7.94653
rps3 ATCG00800	ATCG00800	ATCG00800	11.0519	11.5421	12.1617	9.45786	9.36154	9.45078	9.95581	10.1026	10.9982	11.7929	11.0901	11.9908	9.95188	10.4362	10.1471	11.0108	10.298	10.6659	11.1816	10.974	11.1742	9.81054	10.8077	9.68028	9.68042	9.67725	10.74	10.1902	10.8207	10.6289	8.80718	9.72168	8.95348	10.6411	10.0387	10.2132	10.0896	11.1817	11.0704	9.87063	9.14967	9.65802	9.8399	10.1139	9.49697	11.6366	11.2435
CSR1	AT3G48560	AT3G48560	11.4521	11.481	11.3142	8.68923	8.86716	8.88847	9.62364	9.50527	10.1433	11.5404	11.4571	11.3765	9.4534	10.0014	9.97696	10.4474	10.3405	10.3089	11.5433	11.6144	11.3905	9.63758	10.4517	9.61786	10.3258	10.1018	10.5003	11.3099	11.1503	11.08	9.16381	9.51446	10.0316	11.0869	11.0648	11.3509	10.8183	11.0719	10.753	10.0278	9.49899	9.59765	10.0238	10.3621	9.85531	11.2528	11.2592
AT5G58420	AT5G58420	AT5G58420	9.82034	9.95204	11.1308	8.98813	9.39432	8.88232	10.1424	10.2582	9.51072	10.4702	9.62006	10.3442	9.91501	9.7213	9.92364	10.7037	9.97191	10.8409	10.8863	10.9179	10.8474	9.41949	10.1909	8.99623	10.2121	10.6378	11.0775	9.56037	9.06699	9.56567	9.00853	9.74519	9.09676	9.03227	9.26989	9.72482	9.77515	11.1695	10.6808	10.1504	9.83739	10.1702	10.3643	10.6375	11.4766	10.9251	10.9574
GSTF12	AT5G17220	AT5G17220	3.61563	3.84765	4.97937	7.60027	8.36203	3.32917	3.06636	6.05742	2.92607	3.14541	2	2.91518	5.88847	4.90879	3.36529	4.89448	3.33793	4.43105	2.80768	2.92258	5.07536	5.18381	4.2921	7.09993	4.20682	3.31216	7.05305	3.39167	6.00668	8.66713	12.5067	12.673	10.3339	10.0518	8.10577	10.2152	3.23461	2.44752	2	6.48318	3.53486	3.93141	3.07419	2.60576	4.79123	3.91334	2.70664
AT3G04920	AT3G04920	AT3G04920	10.2811	10.4435	11.5776	9.26953	9.70313	8.82573	10.3844	10.6208	9.99592	11.113	10.4956	10.9909	10.3379	10.4518	10.5588	11.3359	10.4242	11.2392	11.2216	11.2794	11.2959	10.0191	10.8536	9.71548	10.6548	10.7207	11.4643	10.3057	9.76293	10.4477	9.43472	10.0678	8.56009	9.78445	10.0985	10.428	9.88305	10.9425	10.5769	10.6056	9.70195	10.117	10.1243	10.2973	10.9735	10.8006	11.0106
MAPR2	AT2G24940	AT2G24940	11.3204	11.2141	11.2407	11.3464	11.7094	11.1192	10.8811	10.6758	11.0058	11.3671	11.1673	11.149	11.1938	11.0339	11.0282	10.8705	10.9402	10.4702	11.0591	11.1074	11.2733	10.6902	10.8484	10.6601	11.3054	10.4782	10.5676	11.5191	11.6847	11.7918	11.6801	11.6882	10.3867	11.7764	11.9022	12.2369	10.8312	10.5256	10.8459	10.5935	10.4487	10.5494	10.725	10.3467	9.9921	10.3166	10.7315
STV1	AT3G53020	AT3G53020	10.2245	10.312	11.3919	9.9977	10.1663	9.80642	10.5459	10.6695	10.1433	11.1891	10.3262	11.1757	10.564	10.4783	10.4934	11.2197	10.5589	11.1351	11.1676	11.1813	11.3314	10.3371	10.6336	10.1753	10.8533	10.8081	11.4329	10.5472	10.0287	10.6338	10.2495	10.5482	9.98234	10.0723	10.2886	10.6402	10.1576	11.1599	10.9147	10.5733	10.3055	10.3983	10.6758	10.6712	11.3024	11.2414	11.2472
TUA2	AT1G50010	AT1G50010	8.7814	9.33601	10.4697	7.8336	7.53454	8.23106	10.5325	10.5718	9.77065	10.125	9.05991	10.1374	9.05008	9.82739	10.0161	11.0875	9.91825	11.1745	10.2136	9.73266	10.2892	9.6242	10.7678	9.50166	9.51912	9.43224	11.3944	7.6356	8.93864	6.26255	6.71906	7.46294	7.92174	8.52807	8.10577	7.98516	8.40765	10.3693	9.91288	9.69801	9.30316	9.81686	9.83059	10.3704	10.532	10.2421	10.3853
RPL24	AT5G54600	AT5G54600	10.4491	10.6265	11.6063	9.38622	9.88712	8.79331	10.135	9.42991	9.46735	11.4829	10.8945	11.1971	9.95188	10.7481	10.2715	10.1318	9.38836	10.295	11.0022	10.6146	10.8633	10.2085	10.719	10.041	9.50164	8.74538	10.3982	10.0436	10.3089	9.91489	8.99245	9.20858	8.2189	10.409	10.2242	10.1259	10.6043	11.2821	11.385	11.2205	10.219	10.9191	10.2606	10.2362	10.9003	11.5911	11.8792
CAM9	AT3G51920	AT3G51920	12.4922	12.2561	11.4718	11.9555	11.9454	11.9339	11.3854	10.7775	11.5208	11.8489	12.3585	11.3625	11.2251	10.6082	10.678	10.5041	11.3994	10.5601	9.00639	9.10865	10.0706	9.92407	8.6212	10.5333	9.98158	10.6934	9.42026	11.5267	11.3406	10.9346	10.5752	10.6822	9.97176	11.1247	11.3705	11.3374	11.161	10.7054	10.8696	9.74223	10.1533	9.87397	10.464	10.3398	10.0099	10.2613	10.6635
AOC3	AT3G25780	AT3G25780	7.49758	7.39262	5.27378	7.76391	7.67456	9.302	6.62682	6.75297	6.78413	12.0064	12.536	11.0968	10.4397	7.27384	9.10666	10.2154	10.706	10.3654	9.43487	9.3223	8.38709	9.34316	10.5058	8.38395	8.88676	9.56748	8.94084	6.26814	8.14949	4.26856	6.59673	7.07476	7.63018	7.04224	5.99116	5.62474	6.97039	6.54642	5.65978	6.60527	8.13468	6.74552	6.65178	6.9257	5.59153	4.86223	4.9328
ALDH7B4	AT1G54100	AT1G54100	7.61162	7.10853	7.05035	11.3923	11.2824	11.2516	9.4866	10.2498	9.1575	7.33603	7.96455	7.21321	9.36983	8.26796	7.83582	7.84426	7.98035	7.83098	8.35831	8.21784	7.67378	9.05889	7.64384	9.82775	7.819	8.68659	7.6981	10.3549	9.86773	11.5106	11.7796	11.1637	11.3604	10.5627	10.2844	12.3991	8.09323	7.21676	7.44432	7.92994	8.95158	8.68849	7.74678	7.95532	8.0389	6.90492	6.96973
CB5-C	AT2G46650	AT2G46650	8.6212	9.15491	7.15733	8.67031	9.06846	8.44654	9.3626	8.73172	7.78151	10.8276	11.3287	10.7293	9.88923	8.43723	7.77066	10.6883	10.618	10.6096	11.5162	11.4663	11.0679	9.91311	11.2028	9.36265	11.1073	10.9403	10.8476	10.1298	9.44409	9.02405	8.30008	10.3985	10.0239	10.0055	10.1367	8.8817	10.1449	7.59879	7.98201	8.7405	8.52192	8.37121	9.6922	8.17265	9.25369	9.04599	9.52574
LIL3:2	AT5G47110	AT5G47110	11.458	11.3032	11.5106	9.60793	9.92967	9.67021	11.2033	10.357	10.7219	11.0794	11.1465	10.831	10.1267	10.6786	10.5333	11.1164	10.664	11.2279	10.759	10.6791	10.5364	10.1941	10.8484	9.93191	10.5184	9.88059	11.3927	10.8092	10.611	10.6548	9.52694	9.69433	8.60873	10.4837	10.7304	10.7935	10.9706	10.8219	10.966	10.8339	9.96339	10.4194	10.7054	10.707	10.9098	10.7018	10.839
AT4G22240	AT4G22240	AT4G22240	9.93187	9.83649	9.64159	11.3454	11.4805	11.2068	9.86845	10.3237	10.1013	9.93446	10.5208	9.69313	10.0941	9.66396	9.17119	8.90432	9.77465	8.80523	10.0186	10.0721	9.70879	9.73539	9.46949	10.3772	10.0043	9.29515	8.90031	11.3432	10.9688	11.2959	12.0404	11.4058	11.2747	11.3458	11.4471	12.3623	10.9482	10.4727	10.9332	10.2752	10.5747	10.2207	10.2246	10.3651	9.68493	10.3356	10.5598
ACS6	AT4G11280	AT4G11280	11.7121	10.9185	8.59842	7.27243	7.44351	8.9007	8.20835	8.54651	8.58437	9.60909	10.6558	10.3393	8.55537	7.79383	8.43879	7.94243	7.42683	8.58426	10.1106	10.9698	10.3664	7.16676	7.02059	7.25837	7.11913	11.99	7.21941	9.98933	11.1177	6.86178	6.43952	7.84512	10.8322	9.92203	10.2042	6.73388	10.8729	10.6516	9.83514	7.16312	7.91182	7.7047	8.64839	9.1696	8.93008	9.92044	9.87163
AT4G16410	AT4G16410	AT4G16410	11.9756	11.6997	11.5911	10.6612	10.8357	9.59695	10.7966	9.86576	10.6101	11.3618	11.6199	10.8268	11.0374	11.9156	11.2288	11.0098	10.3928	10.7566	11.0798	11.3212	11.0705	11.0844	11.5964	11.0132	10.5612	9.69227	10.6601	11.6415	11.1053	11.3215	10.4065	10.2596	8.3956	10.9952	11.3895	10.8131	11.5006	11.4381	11.4133	11.7867	10.8545	11.2602	10.778	10.6532	10.8689	11.2928	11.5902
RPS28	AT5G64140	AT5G64140	10.0889	10.3172	11.4551	9.94881	10.1327	9.64862	10.3821	10.3189	10.0919	11.2657	10.4667	11.0554	10.5703	10.4921	10.386	11.3664	10.6162	11.1846	11.2902	11.3159	11.2545	10.0068	10.9695	9.91471	10.9468	10.9257	11.5367	10.1182	9.63279	9.99329	9.69537	10.39	9.33013	9.65021	9.94928	9.98122	9.49963	10.522	10.2422	10.2736	9.67943	9.87091	9.92767	10.0744	10.681	10.4678	10.7294
ORA47	AT1G74930	AT1G74930	11.8668	10.8587	5.64124	3.6965	3.53089	5.01055	4.98725	6.5268	5.25564	9.19725	10.8229	10.0724	6.39623	6.9128	6.67751	4.89448	4.01998	5.58282	9.46735	9.83239	9.8597	4.85779	4.65299	4.97749	5.66145	8.91849	4.26176	11.3072	12.3447	5.53067	4.30029	3.16267	3.72721	10.7762	10.0862	5.99132	8.2033	7.67779	6.34085	4.89984	4.42344	4.26531	5.52389	4.82526	3.8608	8.17021	8.50372
BTI1	AT4G23630	AT4G23630	11.1651	10.7784	10.5494	11.5316	11.4738	11.7374	11.0484	11.0495	11.315	10.3031	10.9982	10.2201	10.9335	10.2211	10.3503	10.4097	10.7955	10.5081	11.6435	11.9201	10.7714	10.6682	11.3934	10.7682	11.187	11.2336	10.8069	11.5736	11.0513	11.4127	11.4164	11.383	11.3182	11.1198	11.2717	11.9168	11.048	10.6607	10.9694	10.682	11.3024	10.7485	11.2425	11.104	10.951	10.1992	10.3661
LrgB	AT1G32080	AT1G32080	11.1484	11.3176	11.1439	7.43073	7.70101	7.85734	9.55255	8.30831	10.1084	11.2144	11.3011	11.0822	8.98791	9.7583	9.28347	10.0188	9.43793	9.8248	11.0174	10.9307	10.6523	9.12497	9.65828	9.11398	9.35176	8.38476	9.92877	11.0976	11.33	10.4716	7.89546	8.50669	7.53273	11.3073	11.1661	10.699	11.1084	11.0913	11.1007	10.0669	9.32723	9.72841	9.85375	10.2229	9.93893	11.5131	11.4289
AOR	AT1G23740	AT1G23740	10.8918	10.8676	10.6119	9.03326	9.42637	8.90677	9.47482	8.9341	9.82033	10.8777	11.0682	10.6425	9.2534	9.36135	8.9277	9.21404	9.71994	9.23872	10.4891	10.6747	10.3492	8.87684	9.28091	9.03258	9.88923	8.70266	9.02879	11.546	11.2658	11.0601	9.52414	9.58317	8.27163	11.3542	11.4582	11.3421	11.2183	11.1204	11.2331	10.0543	9.84694	9.69767	10.2228	10.4049	9.65886	11.3038	11.6136
VAR2	AT2G30950	AT2G30950	11.1713	11.1436	11.0154	9.8373	9.96009	10.302	10.061	10.0435	10.7327	11.4025	11.7481	11.116	10.0941	10.3838	9.91047	10.2757	10.682	10.0866	11.3453	11.3767	11.1286	10.2989	10.3896	10.5149	10.7715	9.94568	10.1269	11.4913	11.4316	11.0504	10.3413	10.0327	9.55243	11.6352	11.4794	11.3894	11.371	11.1736	11.2465	10.296	10.2382	10.1694	10.4173	10.8129	10.0852	11.3375	11.4447
AT4G27657	AT4G27657	AT4G27657	12.5241	11.3038	9.23569	7.22135	7.66116	7.42116	8.09745	7.97469	7.86186	10.389	11.8776	10.6647	9.31428	8.59384	8.17489	6.08725	6.11249	6.62374	10.4006	11.2269	10.6904	7.25273	6.91803	7.05352	6.26931	7.04307	6.54732	11.01	11.5847	10.1128	7.30531	7.40507	7.81918	10.731	10.3971	10.0684	8.85583	9.15827	8.25646	5.62187	6.23553	4.89846	6.72397	6.81417	6.44582	9.1969	9.40182
LTP4	AT5G59310	AT5G59310	3.79798	3.45036	3.33932	9.09605	8.64683	4.00905	2.62954	4.66337	2	3.49474	2.61326	2.73496	6.99582	2.42506	3.17698	3.30512	2.81881	2.59155	2.45964	2.77939	2.8335	3.07229	3.07972	3.49032	3.77021	2.57954	3.28675	7.03859	7.81066	8.36299	12.7035	12.1509	10.0392	9.94893	9.78048	11.7067	4.3931	2.7886	2	2.78086	2.6501	2.41261	3.07419	2.23134	2	2	2
CEV1	AT5G05170	AT5G05170	9.74736	10.2158	10.2297	9.03326	8.56281	8.40423	9.85714	9.44176	9.66904	10.5713	10.6595	10.2912	9.25029	10.1074	10.0526	10.9579	10.345	10.4791	10.581	10.6323	10.4036	9.5008	10.6843	9.37528	10.4487	9.47429	10.8582	10.3495	10.5038	9.53804	8.34511	8.80081	7.17494	10.4799	10.4536	10.4059	10.9403	10.9689	10.9963	10.5065	10.0257	10.2834	10.4412	11.019	10.7922	11.0071	10.8578
AT1G27400	AT1G27400	AT1G27400	9.17678	9.76551	10.9713	7.91087	8.12871	7.35161	10.134	10.1789	8.65049	10.3264	9.12158	10.2881	9.18985	9.60932	9.48732	10.567	9.34383	11.0388	10.5063	10.285	10.5724	9.14759	10.0173	8.76616	9.62277	10.519	10.9409	9.07862	8.60696	9.02654	8.3949	8.60543	6.95612	8.87986	8.79288	9.11369	9.26594	10.8055	10.2911	9.73617	9.1631	9.64972	9.69733	9.83383	11.5575	10.6337	10.7273
CHI	AT2G43570	AT2G43570	5.78655	5.35634	4.97937	11.7923	11.8191	12.0302	9.26677	9.39069	9.9362	5.04833	4.23511	4.18371	11.552	9.79437	9.52238	5.03057	9.1323	6.09177	3.85854	4.45352	4.69466	11.2319	6.21254	11.4374	9.05096	10.219	5.70506	5.9268	5.32834	7.93537	11.3744	10.7427	11.851	5.87707	5.5352	7.95618	6.02429	6.07217	7.39012	9.39976	11.9352	11.2167	8.72074	9.18348	7.75234	2.63539	3.68346
EMB3113	AT2G33800	AT2G33800	10.8549	10.998	12.0488	8.04423	8.7892	8.20171	9.81921	9.14094	9.92556	11.5286	10.7713	11.4592	9.50654	10.2425	10.0091	10.3221	9.6739	10.0364	11.0792	10.6829	11.0198	9.68474	10.2289	9.6045	9.3729	8.42405	10.3904	9.76673	10.4283	9.74555	8.17027	8.82307	7.75889	10.3928	9.96699	9.6225	10.3305	11.3588	11.1752	10.5935	9.47457	10.1611	10.1003	10.1057	10.134	11.5283	11.5866
MYC2	AT1G32640	AT1G32640	9.92453	9.32566	7.85491	7.67811	7.82641	8.74665	8.19763	8.2953	7.63242	11.6192	12.327	11.2939	9.55779	8.2934	8.67522	10.3573	10.11	10.477	11.0932	11.3424	10.3843	9.64555	10.5102	8.86801	10.2199	10.5007	9.9954	9.83501	10.644	8.66713	8.32598	8.25854	7.09915	10.3216	9.08766	8.6897	8.92172	7.91367	7.65433	7.43268	7.97411	7.58542	8.20158	7.33297	7.50305	7.62429	7.43775
AT3G60415	AT3G60415	AT3G60415	8.81881	6.80001	6.59752	11.5932	11.532	12.1497	11.1408	12.1269	11.6024	7.47028	6.50577	7.24726	10.83	9.42889	9.56863	7.37342	10.9785	7.70113	5.83992	4.99728	5.75617	10.5359	7.97921	10.8349	9.85208	11.4756	7.43116	6.77543	7.29762	6.96913	9.08257	10.8071	9.56305	7.42089	6.84948	7.86039	7.11421	7.20968	7.98201	8.78346	11.3235	10.0945	9.3549	11.0224	8.47643	5.18839	5.73594
BTF3	AT1G17880	AT1G17880	10.5463	10.7468	11.4969	9.96184	10.1008	9.54727	10.6725	10.4465	9.92021	11.3289	10.8767	11.173	10.606	10.913	10.7346	11.1727	10.363	11.2485	11.3328	11.2992	11.4056	10.3997	11.0498	10.3048	10.5833	10.8007	11.2387	10.7768	10.2263	10.8288	9.82363	10.1418	9.42242	10.2259	10.4602	10.6895	10.2356	11.213	10.7252	10.7064	10.1153	10.4835	10.3914	10.3605	11.2891	10.9967	11.2261
HAI1	AT5G59220	AT5G59220	4.57402	4.24924	5.11296	10.2857	10.8342	10.3563	8.21544	9.53047	9.04891	5.15033	6.55537	4.80306	7.84685	4.35375	5.15079	4.57646	6.31063	6.22808	5.37573	4.63086	4.50893	5.44956	3.91994	8.23247	4.77118	8.44875	5.78942	9.73134	8.60057	11.1473	11.1625	10.8534	10.8867	9.10383	8.99525	12.483	4.84518	4.60686	4.3824	4.14119	8.09118	6.20025	5.24425	7.11136	6.02379	3.075	3.53405
FAD7	AT3G11170	AT3G11170	10.4694	10.7154	10.3929	7.32177	7.36299	7.72607	9.05162	7.8907	9.21545	11.2657	11.7662	10.9036	8.97665	9.34015	9.0665	9.70587	10.0265	9.6083	11.0862	11.2381	10.3397	9.02671	10.0342	9.15486	10.2345	10.0462	9.8863	9.90143	9.94793	9.1526	6.06197	6.64564	7.13754	9.85961	9.99569	9.3399	11.2675	11.2139	11.2138	10.2155	9.86349	9.82215	10.271	10.6476	10.2282	11.2144	11.3981
GAD2	AT1G65960	AT1G65960	11.1857	11.2239	10.5286	8.98303	9.17605	9.01196	9.84002	9.39984	10.1706	11.0794	11.4174	10.8127	9.84453	10.2111	10.1756	10.2995	10.3026	9.90733	11.3742	11.4692	11.2354	9.61341	10.8077	9.57742	10.6087	9.57622	10.0506	11.3669	11.4338	10.8888	9.18165	8.99824	6.31826	11.0182	11.406	10.917	11.5159	11.0309	11.1892	10.6933	10.0455	10.523	10.5266	10.5652	10.0655	10.7994	11.2
DOGT1	AT2G36800	AT2G36800	8.86553	7.62986	5.88487	9.34306	9.51101	8.7735	9.21459	10.4016	7.56545	2.68351	4.15157	4.03573	8.24104	7.5091	7.70243	7.43604	5.54785	8.94631	4.46006	5.50942	5.07536	8.89478	5.34871	9.47843	5.93218	12.0403	7.10884	7.42	7.60263	7.54908	10.4439	10.8658	9.0063	8.31371	8.02055	5.93303	7.56666	6.28899	6.35507	7.43268	8.34799	7.93685	6.9728	6.7221	11.0316	5.1589	5.55384
FAD6	AT4G30950	AT4G30950	10.8012	11.0524	11.0075	8.21064	8.26788	8.35176	9.81921	9.01567	9.74667	10.9581	10.9512	10.8766	9.05008	10.0187	9.97154	10.3726	9.81762	10.3976	10.858	10.6979	10.5582	9.5722	10.3593	9.31097	9.92307	9.08359	10.6342	10.5782	10.47	10.1406	8.30008	8.53779	8.55301	10.6092	10.6142	10.5034	11.0559	11.1961	11.0481	10.5644	9.95238	10.3754	10.4466	10.7414	10.8071	11.396	11.4859
RHL41	AT5G59820	AT5G59820	10.1468	9.26194	6.97045	8.10186	8.37029	9.1819	7.98565	8.58443	8.38903	9.92729	10.5187	10.3403	9.72182	8.61417	9.0252	6.78986	7.46892	8.12444	9.8376	10.2006	9.61119	8.53757	7.02059	8.7517	6.62694	12.2477	7.17828	8.38564	9.26984	6.13925	7.29223	7.22566	8.82999	8.45801	7.95107	5.95272	8.62384	8.49354	7.40387	6.34981	7.74318	7.39422	7.87914	7.56798	8.48706	7.78253	7.45863
AT1G74050	AT1G74050	AT1G74050	10.3864	10.4423	11.1994	9.85417	10.0682	9.27876	10.7368	10.7551	10.1593	10.7331	10.0773	10.5636	10.5489	10.6432	10.7066	11.1472	10.3003	11.1933	10.721	10.6074	10.7134	10.5187	10.8811	10.159	10.3312	10.6661	11.1807	9.87048	9.59794	9.90276	9.64482	9.84495	9.67821	9.62957	9.69681	9.90998	10.0978	10.9938	10.7999	10.9326	10.2273	10.7463	10.4374	10.5665	11.4104	11.0014	11.0838
PPa6	AT5G09650	AT5G09650	10.3774	10.7526	11.5646	8.55125	8.8317	7.9426	9.96321	9.72734	9.79425	11.5613	10.9802	11.4428	9.59997	10.0966	9.93669	10.4535	9.9763	10.3355	11.3855	11.1008	11.3977	9.65873	10.5811	9.34349	10.3384	9.65028	10.9262	9.81565	10.1745	9.23665	8.51798	9.53194	8.6358	10.1283	9.97731	9.37681	10.4195	10.999	10.9746	10.1926	9.07041	9.71027	9.77463	10.0537	10.2645	11.3197	11.3839
PRPS20	AT3G15190	AT3G15190	10.3648	10.7477	12.054	8.58532	8.87299	8.18181	10.0864	9.20494	9.62696	11.678	11.0249	11.5305	9.49869	10.5044	10.1097	10.5795	9.65398	10.4375	11.366	10.8969	11.1551	10.1083	10.5978	9.91254	9.65188	8.86646	10.8027	10.0314	10.4875	9.89869	8.19156	8.67003	8.14544	10.4875	10.2869	10.0752	10.0301	11.0066	10.9225	10.5347	9.51853	10.1627	9.88333	9.95507	10.2712	11.2689	11.4289
AT3G53740	AT3G53740	AT3G53740	10.6041	10.6307	11.6767	10.0352	10.5127	9.7331	10.9234	10.8671	10.1131	11.2033	10.445	11.1377	10.6796	10.7777	10.8691	11.0723	10.3484	11.3325	11.052	10.8315	11.2401	10.4701	10.9647	10.232	10.6139	10.8044	11.5617	10.4994	10.037	10.7692	10.0089	10.4205	10.4395	10.1076	10.2844	10.6553	9.71669	10.6652	10.5252	10.5036	9.77502	10.3826	9.97176	10.05	11.2612	10.8418	10.8646
AT3G21670	AT3G21670	AT3G21670	11.9158	11.6288	11.0147	10.4239	10.7337	9.96911	10.5896	9.80511	10.4485	9.90922	11.1626	9.22917	9.57779	9.3763	8.50037	9.11418	8.79452	9.3888	11.3668	11.7436	10.4861	9.05889	10.1936	9.24711	9.94558	9.44866	9.30439	11.3678	10.7922	11.7002	10.719	10.6344	8.88743	11.1188	10.9989	11.132	10.7953	10.5062	10.491	9.791	9.73574	8.94842	9.92439	9.83712	9.95814	9.87808	10.2496
AT4G36500	AT4G36500	AT4G36500	10.6147	9.65615	8.89281	8.4806	8.86716	10.0344	9.11372	9.29917	9.28371	11.777	12.3288	11.1003	10.3683	8.77175	9.54447	10.0002	11.096	10.2841	10.3885	10.5826	9.95371	8.80752	9.3855	9.20172	10.2082	11.4547	9.39131	9.04353	10.256	7.31679	6.88507	7.14715	8.37165	8.85163	8.81375	6.61533	10.7661	9.97073	9.50144	8.13181	8.46727	7.80636	9.78431	9.78802	8.35412	9.06201	9.59811
UBC28	AT1G64230	AT1G64230	11.7706	11.4378	11.1994	12.4704	12.5557	11.995	12.0675	11.8666	11.5234	10.7311	11.1884	10.4594	11.7839	11.5658	11.2758	11.15	11.4916	11.3702	10.2117	10.1704	10.1699	11.3365	11.0761	11.4775	11.5454	11.0231	10.7378	11.1977	11.0109	11.7245	11.2831	10.9563	10.0111	10.8218	11.0982	11.4109	10.9465	10.5163	10.8141	11.3328	11.2203	11.1303	11.3077	10.9793	10.9313	10.1983	10.427
SAG13	AT2G29350	AT2G29350	5.14484	4.15883	4.0217	12.5592	12.5963	12.2006	9.13447	9.69303	8.7861	4.54803	3.64101	4.03573	10.5987	8.10517	9.19312	4.66278	7.41827	5.79084	3.7819	3.05284	4.29572	9.90428	4.58768	11.2477	7.43273	11.1385	6.35772	5.72014	4.28577	8.72953	10.9727	10.2277	10.4279	4.42605	5.36966	6.26773	5.6552	4.32212	5.32626	8.6402	11.385	11.0429	7.41421	7.9952	7.3989	2.63539	2.70664
AT3G14600	AT3G14600	AT3G14600	9.19315	9.43082	10.5106	9.23561	9.46931	8.91282	10.6293	10.7396	9.53893	9.85738	8.97134	9.93164	9.9442	10.111	10.3419	10.7132	9.84024	10.9305	10.0414	10.0043	10.0494	9.96709	10.4643	9.68536	9.97007	10.5007	10.9035	9.08078	8.85792	9.2622	9.07496	9.39213	8.50976	8.86346	8.90087	9.38589	9.20487	10.4822	9.94143	10.6718	9.7887	10.6745	10.2735	10.1408	11.554	10.4056	10.2466
AT1G73230	AT1G73230	AT1G73230	9.91962	10.1717	11.2266	9.90901	10.1082	9.52374	10.8334	10.8878	10.001	10.887	10.2454	10.8084	10.6266	10.8903	10.9983	11.1823	10.4507	11.207	10.7862	10.7262	10.8542	10.5947	11.1599	10.3804	10.457	10.4776	11.2684	9.81044	9.59954	9.89052	9.38631	9.87875	8.95348	9.57306	9.65244	9.54354	9.98674	10.9462	10.6587	10.9964	10.3665	10.7998	10.7041	10.5665	11.078	10.9757	11.117
ELIP1	AT3G22840	AT3G22840	7.63578	7.62986	8.0999	7.51799	9.07858	8.17176	7.5306	8.76983	8.27628	5.92999	5.77748	5.96493	5.39716	4.77075	5.20111	4.82131	6.46831	5.94123	6.30451	6.75327	5.73514	6.70023	6.16854	6.7771	6.28426	6.24507	7.36855	8.87912	7.49652	9.30176	11.2077	12.714	12.3749	8.91211	8.7717	10.4585	8.52131	7.35778	8.09644	7.82419	6.93558	7.48234	8.00864	7.06713	7.78714	7.95115	7.73171
AT3G61870	AT3G61870	AT3G61870	10.7188	10.9609	10.996	8.0045	8.3948	7.43804	8.92743	8.05406	9.81458	11.2471	11.2853	11.1993	8.9462	9.5313	9.22082	9.7472	9.85618	9.51009	11.0626	10.8235	10.8711	9.04691	9.60563	8.78522	9.89412	8.56128	9.84911	10.5219	10.7336	10.43	8.12672	8.5795	6.17796	10.9703	10.7304	9.7796	11.0962	11.2617	11.3218	10.1513	9.45442	9.86273	10.2855	10.4707	9.98237	11.5087	11.5481
AT5G67510	AT5G67510	AT5G67510	9.79105	10.0496	11.2012	9.63746	9.94358	9.7228	10.6866	10.6895	10.0211	10.5376	9.65081	10.1941	10.2657	10.1859	10.0594	11.0494	10.5033	11.2295	10.7727	11.0402	10.5908	9.94143	10.4239	9.77867	10.5893	11.5354	11.1972	8.94715	8.65708	8.35113	9.17454	9.47482	8.78837	8.50711	8.81375	8.58949	8.37777	9.57767	9.2508	9.36405	9.08258	9.19327	9.39336	9.80045	10.5644	9.39488	9.6715
CCR1 AT4G39260	AT4G39260	AT4G39260	10.0998	10.3094	10.3072	9.14713	9.37803	10.3519	10.5374	10.338	9.58023	10.9261	10.1095	10.6647	10.3883	10.5865	10.7314	10.6728	10.3177	10.739	11.1347	11.8622	11.6583	11.4069	11.1479	11.4709	11.0619	11.2474	11.1219	10.0008	9.7814	9.8177	10.6178	9.81986	10.9622	9.64336	9.72891	9.70609	9.24403	9.96234	9.47889	9.71043	9.65247	9.73515	9.45677	9.65988	9.96043	10.227	10.1031
AGP1	AT5G64310	AT5G64310	11.2517	10.6557	9.09205	9.51907	9.18076	9.88852	7.71719	8.69752	8.52919	10.986	11.6315	10.5155	11.2932	9.5604	9.90288	9.62486	8.57319	10.1238	9.63603	9.9758	9.57762	8.75938	8.22453	9.24022	6.07661	12.0561	8.48139	8.91597	10.3351	7.66219	9.75617	9.03957	12.1581	9.51724	9.05101	9.87428	8.4142	9.24557	8.15449	7.1041	7.93885	7.71383	7.35048	7.02922	8.4976	8.84539	8.66065
BIP1	AT5G28540	AT5G28540	9.25295	9.17523	9.84732	9.67592	9.34487	11.0875	9.24612	8.97953	11.3271	9.54733	9.10502	10.096	11.2115	10.8672	10.405	9.67893	11.5447	9.21595	9.96655	9.97272	10.8614	11.8246	10.5915	11.2766	11.7084	11.1368	10.1903	9.10225	9.24957	9.27691	10.4424	10.5878	9.44938	9.31499	9.26148	9.05796	9.05353	10.0717	10.5432	10.1766	11.4101	10.8488	10.2957	11.7395	9.38897	10.0676	9.40182
SEP1 AT4G34190	AT4G34190	AT4G34190	11.3408	11.3032	11.5071	10.0523	10.3551	9.73651	10.5515	9.87454	10.5782	11.773	11.6454	11.3606	10.574	11.0903	10.3614	10.3163	10.6218	10.2675	11.4152	11.3867	11.052	10.5961	10.9591	10.5873	10.7514	9.71281	10.4188	11.3164	11.0324	11.0984	9.6829	9.93825	9.43789	10.9882	11.1379	11.0981	11.222	11.3269	11.4761	11.2846	10.5646	10.8094	10.818	10.6944	10.7007	11.3733	11.8249
AT1G36730	AT1G36730	AT1G36730	9.25685	9.16945	8.99153	9.97732	9.63276	9.81936	10.6596	10.6858	9.72228	9.46559	9.56058	9.07894	9.59752	9.61185	9.80256	11.0414	10.2956	11.1203	9.7038	9.72901	9.30722	9.73787	10.1575	9.73277	10.3544	11.0543	10.896	9.21495	8.6815	9.48657	9.56822	10.3312	11.0288	8.79097	8.90087	9.25521	9.2385	9.44845	9.40395	9.71167	10.0732	9.7629	10.4001	10.3997	11.402	9.30181	9.35803
DiT1	AT5G12860	AT5G12860	10.2305	10.9449	11.0609	9.33907	9.35739	9.16172	9.43585	8.84317	9.92021	11.3063	11.0718	10.8282	9.54768	9.83174	9.12307	9.71852	9.79464	9.46528	11.2525	11.0363	10.9365	8.7045	9.87395	8.99214	9.8036	8.95536	9.62449	10.4366	10.0927	9.71349	9.03233	9.49873	7.97571	10.2176	10.0456	9.63931	11.1551	11.5057	11.6191	10.3107	10.0119	10.1127	10.185	10.6742	10.0866	11.3126	11.6229
AT1G52000	AT1G52000	AT1G52000	7.41623	7.25756	6.38502	5.49942	5.96761	6.4038	6.16666	7.06032	6.06624	8.9043	9.77637	8.64049	7.88748	7.02332	6.19685	8.59421	7.22553	7.35905	11.3005	10.9291	11.8434	10.0614	11.4954	8.43311	10.0951	10.2981	9.98501	9.35211	8.2468	11.5322	8.58387	9.3044	5.4203	9.61844	9.41355	10.0319	7.90127	6.44166	6.89217	7.4085	6.72399	7.07802	6.68316	5.66142	5.35223	7.15693	5.66583
THFS	AT1G50480	AT1G50480	9.4901	9.22899	9.15794	10.5134	10.3235	9.7331	10.9486	10.613	9.4526	8.81394	9.25013	8.99126	10.3683	10.9324	10.6813	11.2148	9.85935	11.3893	8.99582	8.77289	9.19428	10.7469	11.0872	10.5362	9.96427	9.96198	11.0382	9.42549	9.72231	9.82915	10.809	10.5066	10.3339	9.60723	9.53025	9.55968	9.54961	8.89064	9.40053	10.7771	10.4597	10.788	10.244	9.74772	10.8746	8.97373	8.79399
AT1G78020	AT1G78020	AT1G78020	11.6556	10.9907	10.2062	9.06741	9.59801	9.4043	10.4648	9.79128	9.89861	9.45067	10.2617	9.39209	9.0714	9.55515	8.61617	10.2332	9.80124	10.3035	10.0869	10.6683	10.2637	9.37226	10.2994	9.27434	10.5207	10.0318	9.97603	11.6033	11.0324	11.0552	8.38261	8.54929	6.67216	10.5356	11.2671	10.7484	11.6434	10.0804	10.9314	10.0918	9.43082	9.5178	11.3343	9.9275	10.5315	10.5791	11.1463
CYP81D8	AT4G37370	AT4G37370	5.65087	3.95901	4.66814	7.79918	8.5189	9.53947	7.38709	8.56288	8.11702	4.75647	4.38893	4.97544	7.50425	5.09386	8.0973	6.62763	7.90265	7.75628	3.08787	3.65499	3.82436	6.92635	3.6903	7.54225	5.07622	12.2245	6.27235	4.08667	4.72225	4.57082	7.16885	8.53008	11.2617	4.37407	4.54788	5.06127	5.58722	5.81691	4.89168	6.29808	8.17313	7.64867	7.35698	8.45311	8.53902	4.04813	3.9426
AT2G42760	AT2G42760	AT2G42760	9.79105	9.43323	5.7271	6.99673	7.27772	7.7932	7.35531	6.7144	6.28185	11.396	12.7686	10.8429	8.50925	7.24806	7.05121	9.00895	9.00936	8.93839	9.60161	10.2859	9.18462	8.47933	8.21375	7.59721	8.53949	8.42957	7.09233	10.1557	10.4165	8.98622	7.03393	7.37093	6.64577	9.64336	9.18877	8.55125	7.85865	6.22027	5.81182	5.60068	6.74456	5.81539	6.07434	5.94822	5.29535	6.62117	7.06814
IDA	AT1G68765	AT1G68765	4.47035	3.72698	3.18603	6.52124	6.82781	6.91854	5.23089	5.78704	5.98656	3.89809	2.33897	3.6846	6.96578	3.01997	4.86891	3.97895	5.02328	5.52046	2.80768	2	2.8335	4.43592	2.35435	4.76351	3.00331	12.2302	3.36214	2.49155	2.51671	2.53528	4.07445	3.45111	7.41264	2	2.44264	2.27491	2.82639	3.18456	2.4868	3.88483	4.31759	4.86607	5.06528	4.46522	6.09218	2.24422	2
AT4G02530	AT4G02530	AT4G02530	10.6223	10.8488	11.4382	8.07334	8.57001	7.98914	9.25649	8.39622	9.80008	11.5602	11.2693	11.1713	9.206	9.92621	9.19932	9.94855	9.96752	9.69672	11.2579	11.1241	11.0285	9.14384	10.1147	9.16944	10.1634	8.79761	10.0718	10.6572	10.7985	10.16	8.24684	8.80401	7.70878	10.6085	10.6706	10.355	10.8609	11.1808	11.2523	10.3229	9.29097	9.69306	9.96964	10.3436	9.81877	11.3424	11.6043
THM1	AT1G03680	AT1G03680	11.053	11.0255	10.7895	9.5261	9.44214	9.49177	10.0362	9.10038	9.99846	11.3343	11.5553	10.9808	10.0428	10.3779	9.54691	9.79695	10.2064	9.64408	11.1352	10.9428	10.9868	9.73787	10.0358	9.76912	10.4652	9.23803	9.71265	11.3319	11.2124	11.2391	9.41676	9.45051	7.85418	11.1645	11.3364	10.9554	11.2725	11.1014	11.385	10.458	10.24	10.0456	10.7312	10.4974	10.0845	11.3338	11.7379
AT1G04480	AT1G04480	AT1G04480	10.3356	10.4566	11.61	10.1096	10.6898	10.0371	10.867	10.856	10.0919	10.9062	10.2529	10.692	10.8153	10.8067	10.8186	11.1217	10.5983	11.3776	11.1197	11.206	11.0344	10.5216	11.0284	10.2406	10.8813	11.119	11.4084	9.98008	9.42974	9.99202	10.0029	10.5125	9.91487	9.5351	9.67796	10.0226	9.21241	10.3526	10.1616	10.3581	9.78374	10.0751	9.94396	10.0519	10.9406	10.1201	10.3647
AT1G57860	AT1G57860	AT1G57860	9.81241	9.89542	10.9319	8.97277	9.1475	8.36064	9.97894	9.7959	9.27115	10.4565	9.61031	10.1453	9.57282	9.67125	9.50996	10.5767	9.50216	10.8075	10.5145	10.5129	10.5025	9.17353	9.72624	8.86801	9.89533	10.5216	10.868	9.4118	8.93611	9.44068	8.92202	9.64875	9.77575	9.01328	9.18699	9.3001	9.36739	10.85	10.5995	10.1757	9.30835	9.7452	9.79033	10.1247	11.5169	10.791	10.9408
HB-7 AT2G46680	AT2G46680	AT2G46680	7.40221	6.30536	5.83418	10.713	11.0869	10.4341	8.51778	9.59027	8.8267	5.15033	6.34585	4.80306	9.46418	7.88029	6.86086	5.75529	6.23461	6.37628	7.02311	8.106	6.64654	8.83565	6.8219	9.71548	7.70693	8.54864	5.81648	10.4324	9.68807	11.6559	11.6688	11.1606	11.2682	10.0946	10.2346	12.1811	6.74974	6.42954	6.22178	7.24736	9.08862	7.45538	6.51895	6.46239	6.77886	5.6577	5.34538
FIB1	AT5G52470	AT5G52470	8.81353	9.12835	9.86163	8.39097	8.7892	7.83202	10.1284	10.5084	8.34178	10.0362	9.47296	9.66665	9.24405	9.4601	9.49491	10.5494	9.63007	11.0168	10.2254	10.4186	10.3142	9.16617	9.63017	8.90333	9.78269	10.7263	10.6929	10.0927	9.25771	9.80181	9.41374	9.78138	9.77879	9.29416	9.54141	9.882	9.86881	10.439	9.72862	9.54968	9.27692	9.36826	9.97809	9.8761	11.672	10.3569	10.5119
AT4G00810	AT4G00810	AT4G00810	9.43952	9.68073	10.7753	9.48699	9.86097	8.82573	10.8213	10.08	9.41885	10.6387	9.86754	10.5762	9.89323	10.093	10.0491	10.7018	9.91216	11.0107	10.4268	10.205	10.4837	9.5722	10.2275	9.45481	10.0823	10.1562	11.1761	9.42037	9.14589	9.39327	8.82545	9.54922	8.80635	9.12757	9.12895	9.12891	9.16656	10.1932	9.93553	10.366	9.52301	10.0164	10.2821	9.85566	11.4465	10.3006	10.5561
AT4G27280	AT4G27280	AT4G27280	12.3396	11.3846	9.24299	8.72023	8.94667	9.87619	9.13634	10.4842	9.59709	10.7362	10.4428	10.9853	10.6842	9.82303	9.96245	7.99329	8.59616	8.38577	10.5416	10.6034	10.6952	9.44407	8.30293	9.27097	7.90375	11.0453	7.94489	10.7286	11.9824	7.77892	8.38877	8.167	8.1169	10.8404	10.9263	7.06768	10.6939	10.2417	9.41587	7.02675	7.62056	7.44445	9.71641	8.7357	8.12575	9.80738	9.72204
PAL1	AT2G37040	AT2G37040	10.1635	11.4172	12.1249	8.59873	8.67378	7.95437	7.17044	8.9299	10.3445	10.5986	10.6222	10.6488	8.69011	7.83771	8.66629	8.12455	9.24799	8.31099	11.1221	10.317	10.1913	8.831	9.4942	8.42706	8.86205	8.66567	9.52342	8.57876	9.7105	8.27785	11.427	12.2446	9.10647	9.97206	9.22038	10.2101	9.93867	10.6788	10.5883	9.4391	9.35592	9.05822	8.62972	10.1328	8.2432	10.8089	10.5622
AT2G34250	AT2G34250	AT2G34250	10.1277	10.2074	10.5986	10.9898	10.8535	11.4817	10.8357	10.3956	11.3982	10.936	11.1083	10.9234	11.5696	10.9243	11.0063	10.8442	11.7244	10.638	11.2011	11.0766	10.832	11.3216	11.1704	11.108	11.83	11.136	11.0621	10.0667	9.98519	10.2254	10.4761	10.9578	10.1301	10.0215	10.0795	10.0695	10.0449	10.5971	10.7697	10.9342	11.4008	11.068	11.2373	11.5987	10.5908	10.3762	10.1212
HB-12	AT3G61890	AT3G61890	9.20934	7.88381	6.89825	11.1656	11.5836	10.8809	9.60349	10.2396	9.09238	7.55641	9.17014	7.42137	8.9462	7.38448	7.18225	6.35693	7.69849	7.06349	7.46427	8.12463	7.25342	9.11352	7.49147	9.71051	8.16033	8.39043	6.57927	10.3911	9.71937	11.6266	11.6675	10.8277	12.0584	9.76187	9.50907	12.2319	8.49372	7.2447	7.81722	8.05208	9.51405	8.55516	7.66007	7.90596	7.08885	6.78457	7.22264
AVA-P1	AT4G34720	AT4G34720	11.4682	11.3473	11.5035	11.2678	11.3202	11.0399	10.5189	10.4465	11.1361	11.4663	11.6653	11.4074	11.3209	10.9007	11.0829	11.0723	11.1788	10.7538	11.5375	11.4524	11.3561	10.6773	11.385	10.6639	11.4083	10.5542	11.0914	11.1433	11.1344	10.5999	10.4454	10.8908	11.0314	10.9094	11.1091	10.9915	11.4092	11.4271	11.679	11.4018	10.9818	10.9884	11.0603	11.2898	10.5654	11.3118	11.3995
AT1G56045	AT1G56045	AT1G56045	10.5222	10.5067	11.8657	10.745	10.9253	10.2408	11.0264	11.0398	10.0459	11.5826	10.9519	11.3674	10.9784	11.0985	10.7621	11.2892	10.7697	11.1159	11.4203	11.3147	11.4023	10.4761	11.0284	10.6301	11.0732	10.8092	11.4017	10.8984	10.5081	10.8479	10.3665	10.5728	9.47584	10.4441	10.7218	10.9019	9.56883	10.4652	10.2781	10.2769	9.76372	9.9012	9.81886	9.76166	10.0768	10.3858	10.6968
mMDH1	AT1G53240	AT1G53240	10.9018	11.1146	11.4028	9.33106	9.75137	9.2018	9.46592	8.85652	10.0703	11.5119	11.1719	11.215	10.0446	10.249	10.2477	10.5416	10.3049	10.2323	11.4364	11.3248	11.2056	9.48312	10.6091	9.56093	10.625	9.66793	10.6299	10.4383	10.3138	9.85876	9.9989	10.1531	7.17494	10.3182	10.4282	9.37863	10.7487	11.3026	11.385	10.5122	10.0056	10.319	10.2361	10.581	10.3664	11.3453	11.5371
HSD2	AT3G47350	AT3G47350	9.72501	9.55565	9.69584	10.2222	10.3551	10.4612	11.2219	10.7996	10.1661	9.57051	9.76938	9.50545	10.4907	10.6846	10.8075	11.2527	10.4316	11.0074	9.50359	9.38548	9.57171	10.6552	11.1408	10.3835	10.333	10.0181	10.9516	9.68514	9.60593	9.63903	9.956	10.0916	8.45	9.35911	9.4687	9.38951	9.37581	9.43335	9.10911	10.7255	10.2526	10.5365	10.5949	10.5036	10.686	9.56473	9.39371
AT3G02480	AT3G02480	AT3G02480	3.16264	3.10781	2.8198	8.95724	9.63619	8.64129	3.67279	6.48158	5.18601	2.38186	2.84363	2.52897	7.84685	6.12483	6.79685	3.30512	2.32728	3.12611	2.80768	2.4417	2.66585	6.43196	4.51927	6.7771	3.58938	8.37619	4.94023	6.25286	6.40888	7.49262	9.80303	9.69433	8.98541	8.1725	7.37148	12.5528	2	2	2.4868	4.79177	4.42344	5.38352	2	2	3.12726	2	2.39616
AT2G46600	AT2G46600	AT2G46600	11.0451	10.6074	9.24542	11.567	11.7668	12.0869	11.2055	11.3904	10.82	10.8552	11.6859	10.2466	11.5895	10.8767	9.7675	10.1441	10.7544	10.5188	10.8931	11.3428	10.3902	11.4455	10.8717	11.6564	11.1477	11.8466	9.88869	11.1418	10.599	11.7653	10.7753	10.9088	8.89306	10.8248	10.7498	9.95339	10.2685	9.84744	9.74625	10.576	10.926	10.3264	11.1179	9.50134	10.117	8.87062	9.18712
AT1G54500	AT1G54500	AT1G54500	11.1155	11.1597	11.1925	9.21399	9.55153	8.47952	9.55255	8.78387	10.1341	11.2048	11.3132	10.8324	9.54768	10.0545	9.35189	9.7656	9.6485	9.54575	10.8117	10.7378	10.7752	9.16617	9.44895	9.15852	9.62424	8.02832	9.60619	11.0793	10.9594	10.8159	9.22015	9.21822	7.09915	10.9697	11.1323	10.6364	11.3334	11.2566	11.5169	10.3769	9.6821	9.95609	9.94827	10.227	10.0991	11.1252	11.4973
EBP	AT3G16770	AT3G16770	10.6463	9.86536	8.79015	11.069	11.1955	11.6377	11.3443	11.5239	9.32883	8.4589	10.2019	8.12205	10.2887	10.9293	9.91047	8.8058	7.60346	9.17099	7.55342	8.59989	7.96769	10.4656	9.73381	10.6367	8.44616	8.88066	8.18701	11.8348	10.0812	11.6994	10.3835	9.38359	8.90979	9.87138	10.5929	11.6419	10.5428	9.32462	9.13199	10.2567	10.131	10.2414	9.45677	7.69451	9.5597	7.43428	8.12042
SZF1	AT3G55980	AT3G55980	11.1857	10.3874	8.26689	7.77576	7.45908	9.07266	8.01442	8.9087	8.55704	10.5411	10.6076	10.8935	9.05722	7.74858	8.02929	8.05444	8.7058	8.74742	9.3445	9.26634	9.44147	7.16676	6.337	7.6708	6.73972	12.0645	6.89702	9.08078	10.6486	6.78158	7.29223	7.72186	9.34661	9.35744	9.26485	6.08352	10.3915	10.1706	9.00927	6.82222	7.95217	7.51404	8.96584	8.84669	8.17125	9.1969	9.07663
RPS11-BETA	AT5G23740	AT5G23740	10.1468	10.4894	11.782	9.5744	9.97371	8.93082	10.4133	10.5582	9.83747	11.1318	10.1598	10.9527	10.54	10.5566	10.8346	10.9113	9.89065	10.9912	11.1139	10.9147	11.1936	10.2921	10.8631	9.97198	10.1328	10.3027	11.2036	9.84905	9.46182	9.80472	9.19225	9.598	8.20088	9.48084	9.61196	9.72911	9.92497	11.0264	10.6751	10.707	9.7072	10.6178	9.99174	10.1698	10.8332	11.0342	11.1742
RPS1	AT5G30510	AT5G30510	10.7272	11.0183	11.6147	9.10077	9.51846	8.65579	10.3678	9.48823	10.0508	11.4369	11.2341	11.3445	9.71506	10.3794	9.98955	10.5529	10.1545	10.5028	11.0842	11.0407	11.0794	9.95859	10.4425	9.72292	10.2574	9.26301	10.8419	10.8137	10.9368	10.6605	8.87015	9.56629	9.1257	11.0839	10.8753	10.6364	10.7655	11.1699	11.0816	10.5767	9.82054	10.0875	10.541	10.3922	10.6253	11.3821	11.4209
AT2G32060	AT2G32060	AT2G32060	9.68794	10.0684	11.2756	8.81517	9.45384	8.70543	9.97267	10.0532	9.46	10.8712	10.0328	10.636	10.0156	10.0619	9.89144	11.0139	10.1939	10.9195	11.0942	11.126	11.0663	9.5008	10.3715	9.38469	10.5025	10.4955	11.2431	9.86547	9.16766	9.78575	9.25427	10.1891	8.98013	9.26948	9.53863	9.6271	9.61935	10.8294	10.3859	10.219	9.59274	9.84206	10.1675	10.1328	10.8815	10.657	10.8802
CLA1	AT4G15560	AT4G15560	10.7959	10.9381	10.649	8.07334	8.11893	8.4213	9.13821	9.2427	10.2128	10.6199	11.0116	10.8725	9.26579	9.89333	9.84075	9.42479	9.85777	9.06939	10.8846	10.717	10.9027	9.38501	9.87052	9.26758	9.89046	8.48105	9.23964	10.4601	11.1617	10.0506	8.1559	8.4869	7.92174	10.8945	10.6643	10.1474	11.4796	11.3691	11.1065	10.5801	10.1638	10.4511	10.1749	10.7373	9.3241	11.5334	11.4757
AT5G14730	AT5G14730	AT5G14730	3.40684	3.10781	3.47787	4.77124	4.51705	5.01055	5.99579	6.86286	4.05323	5.87145	6.0087	5.56695	5.39716	4.61809	6.09408	4.3866	3.71889	6.25386	4.35817	4.19598	4.176	6.19194	3.07972	6.48235	4.00497	12.187	4.09498	2.49155	4.00534	2.92482	3.94672	5.34574	5.59601	3.33426	3.38731	2.50572	3.11094	3.49492	4.26684	4.67495	4.37148	5.23922	4.17021	2.76189	6.68603	4.66656	4.59835
mtHsc70-1	AT4G37910	AT4G37910	7.22243	7.80402	8.72208	7.27243	7.11025	7.40409	9.51995	10.2413	7.78151	9.33088	8.637	8.95567	8.59026	8.83373	9.82479	10.3557	9.16594	11.0206	9.59322	9.81987	9.64258	8.82633	9.51631	8.90769	9.55964	11.502	10.6044	8.58487	8.10505	8.02269	8.57849	8.71495	9.94765	8.27171	8.19686	8.28612	8.46875	8.95337	8.51255	8.68116	8.51595	8.9941	9.00155	9.01522	11.3057	9.31858	9.31859
PR5	AT1G75040	AT1G75040	9.28768	9.45476	8.41654	9.02832	9.54059	10.0781	7.87793	6.48158	9.81458	9.38419	8.35836	8.88445	12.0875	9.38224	8.24852	7.14509	10.3303	7.07076	8.73377	7.90075	9.03135	11.1038	6.89122	9.46075	10.0554	8.92241	7.87583	5.31195	4.2206	8.64787	10.0009	7.63822	4.605	4.0154	3.05469	4.12388	8.53641	8.85255	8.57765	9.26143	12.0341	11.2074	9.33034	10.0556	7.7837	6.99112	7.21037
AT4G36130	AT4G36130	AT4G36130	9.30285	9.70089	10.6681	8.43648	8.65362	8.25982	10.4408	10.2815	9.14379	9.75586	9.14337	9.41661	9.51952	9.7787	9.7841	10.5522	9.76116	11.1177	10.3763	10.4224	10.218	9.53552	10.1561	9.20172	9.89533	10.764	11.0059	9.0721	8.51484	8.9262	9.02444	9.39425	9.06225	8.66415	8.7478	9.0625	8.80186	10.2538	9.82369	9.76979	9.10064	9.65565	9.70372	9.91508	11.4157	10.0536	10.118
PRPL11	AT1G32990	AT1G32990	10.5933	10.9525	11.7837	7.0946	7.62017	7.20155	8.62828	8.24206	9.57001	11.452	10.955	11.388	8.64816	9.59405	9.11652	9.57842	9.30486	9.20443	11.1746	10.7606	11.043	8.78365	9.6523	8.53797	9.27523	8.13027	10.1106	9.96141	10.4355	9.61774	7.44187	7.92964	5.80125	10.5965	10.165	9.82171	10.4211	11.0213	10.9361	9.84269	8.8148	9.41938	9.46883	9.77318	9.3867	11.3101	11.3605
TUF	AT4G11150	AT4G11150	11.4264	11.3018	11.4104	11.2803	11.3476	10.9501	10.9396	10.6594	11.0591	11.6955	11.8153	11.4252	11.2171	10.8022	10.6769	10.9294	11.1737	10.6991	11.5806	11.7061	11.5367	10.6273	10.9767	10.6639	11.4714	10.7814	10.9047	11.4663	11.2998	11.297	11.3937	11.4278	11.3451	11.2207	11.4471	11.468	11.1369	11.0947	11.346	10.7629	10.5617	10.5112	10.5128	10.6791	10.5232	11.0403	11.0703
AT2G36170	AT2G36170	AT2G36170	9.73623	9.75397	11.1836	9.77961	10.3592	9.05088	10.6432	10.8019	9.64329	10.7707	9.93935	10.4375	10.5577	10.658	10.5357	11.1878	10.1609	11.3684	10.7223	10.7146	10.6333	10.135	10.6833	10.041	10.4495	11.0826	11.3416	9.79996	9.26984	9.60448	9.6267	10.0902	9.11612	9.37572	9.60931	9.81096	9.1411	10.1661	9.82241	10.0218	9.46065	9.78689	9.71894	9.78005	10.9941	10.0765	10.3592
ADC2	AT4G34710	AT4G34710	7.47097	7.24662	9.91749	10.2669	10.3654	10.1643	8.09361	8.62139	8.09819	10.874	10.6913	11.3994	9.75952	8.48216	8.89368	8.85246	8.99215	9.44444	11.7583	11.5127	10.6262	9.85474	10.5621	10.9396	8.72355	10.1267	10.5009	8.53522	8.25902	9.38554	11.1104	11.081	11.3502	8.33426	8.50704	10.3003	7.21526	8.34008	7.93547	8.71853	10.1771	9.29106	7.71677	7.87636	8.97151	8.2067	7.21037
AT5G20700	AT5G20700	AT5G20700	10.1593	9.89717	9.68336	10.1602	10.3757	9.54727	10.7877	9.77263	9.70993	9.33359	9.80741	8.5342	9.81534	10.3897	9.71219	10.6748	10.3142	10.6417	10.1086	10.7158	10.1522	9.70521	10.3908	9.83005	11.1969	10.6544	10.9762	11.2239	10.3284	11.271	10.2994	10.2724	6.17796	10.595	11.0448	10.9614	10.4031	9.33928	9.86028	10.2233	9.74853	9.79444	10.1795	10.1505	10.9184	8.8361	9.01099
OPCL1	AT1G20510	AT1G20510	8.67466	7.90482	5.88487	6.97633	6.96506	8.4213	6.82547	7.06032	7.24428	11.8265	12.5145	11.5012	8.69011	6.96121	7.8198	9.55463	10.3597	9.52737	9.60439	9.70692	9.29111	8.53757	9.00886	7.72116	9.57644	9.38466	8.19991	7.64734	9.3232	6.42221	6.77654	7.24464	7.47393	8.16104	7.38394	6.83284	8.83888	7.4979	7.41069	7.04256	8.15788	7.31844	8.3027	8.03784	7.08326	7.42192	7.44823
AT1G71500	AT1G71500	AT1G71500	11.1058	11.05	10.7879	8.70171	9.02725	8.31568	9.68374	8.73172	10.1863	11.3028	11.4642	10.9398	9.47222	9.72831	9.48732	9.78978	9.87195	9.59575	10.9028	10.7971	10.8039	9.15876	9.56166	9.21935	9.9873	8.67267	9.4902	11.0111	10.7189	10.3636	8.46651	8.99824	8.29729	10.6391	10.7878	10.49	11.2707	11.2702	11.3597	10.1838	9.82416	9.7585	10.1813	10.5652	10.1157	11.2928	11.6729
2-Cys Prx B	AT5G06290	AT5G06290	10.1862	10.7841	11.1981	6.75473	7.63396	7.48752	8.81042	8.37164	9.84596	11.447	11.0242	11.3351	8.81332	9.14442	9.21165	9.57981	9.80124	9.2738	11.1863	10.754	11.1261	8.60994	9.48526	8.60387	9.76548	8.57382	10.0109	9.62113	10.3722	8.89386	7.06502	7.42184	6.61888	10.2843	9.82571	9.22314	10.3477	11.0474	10.9379	9.95342	9.21193	9.61724	9.56602	10.3421	9.64565	11.5007	11.2923
AT2G30620	AT2G30620	AT2G30620	10.285	10.4613	10.3394	10.1305	10.0059	11.1795	11.394	10.5238	10.4298	10.0869	10.1625	10.2371	10.9822	10.3509	10.0284	9.6329	9.60952	10.4646	10.6714	10.6759	10.7919	10.3695	9.94576	10.8497	10.3712	11.0791	10.2805	9.92693	10.6339	10.021	10.0248	9.91177	10.3298	10.8422	10.572	10.2365	11.2725	10.7705	11.1118	10.6036	11.0786	10.3486	9.92111	10.3997	11.4836	11.1361	11.1046
AT1G13520	AT1G13520	AT1G13520	2.49865	2.36602	2.8198	8.35982	8.2046	9.65585	6.29282	7.35175	4.20176	2.38186	2.84363	2	7.08237	5.66098	6.74691	2.79537	2.59388	4.47556	2	2.23769	2.8335	7.23875	3.6903	8.64096	3.2669	12.1651	2.60744	2.26661	2.51671	2	5.9664	4.38173	10.0618	2	2.23823	2.27491	2	2.7886	2.26384	4.59147	6.57115	6.89748	2.94207	2.43066	3.80755	2	2
LOX4	AT1G72520	AT1G72520	8.17851	7.53421	5.23523	6.57649	6.41371	8.31568	5.83917	6.08791	5.945	11.3578	12.5559	10.9036	8.69011	6.09621	7.6308	8.99029	9.45269	9.23549	8.49361	8.42749	7.48517	7.19599	7.64384	7.25837	7.68456	11.0267	6.61823	6.54397	7.62798	5.1105	5.36157	5.8458	7.98627	6.88398	5.5352	5.06127	7.98291	6.73555	6.25248	5.55733	6.76484	6.38305	6.5646	6.24142	6.15747	4.11108	4.9328
AT3G23390	AT3G23390	AT3G23390	9.71371	10.0049	11.2862	9.47976	9.81631	8.9835	10.2825	10.4001	9.44144	10.9608	10.185	11.0096	10.0836	10.1722	9.92925	10.8506	9.96164	10.942	10.9948	10.9538	10.9935	9.5722	10.3372	9.40022	10.3773	10.537	11.1623	10.0711	9.57694	9.86712	9.56278	9.98837	9.01664	9.72214	9.94298	9.9872	9.92726	10.909	10.5928	10.4616	9.8576	10.1144	10.1968	10.1523	11.1375	11.0738	10.9482
OHP2	AT1G34000	AT1G34000	11.0281	10.9642	10.5986	9.38622	9.62588	9.61562	9.65922	9.35038	10.0236	10.7686	11.0532	10.3608	9.77042	9.71896	9.32377	9.19244	9.84344	9.00442	10.426	10.3656	10.2124	9.16247	9.29377	9.3531	9.7708	8.6912	8.84718	10.962	10.6276	10.5823	9.57903	9.32906	8.80635	10.7037	10.6933	10.7666	11.5565	11.3731	11.4453	10.6629	10.3969	10.3464	10.6614	10.7836	10.0641	11.2839	11.6929
PSB28	AT4G28660	AT4G28660	10.8079	11.0757	11.372	8.0637	8.2411	7.85734	8.75304	7.88203	9.64977	11.3947	11.0168	11.0614	9.0393	9.60678	8.89368	9.56867	9.18374	9.28635	11.1779	10.9259	10.6836	8.47933	9.37828	8.52102	9.43117	7.87473	9.97828	10.3602	9.96295	9.92293	8.08182	8.40069	6.64577	10.0362	10.174	9.6117	10.3907	11.1161	11.1692	9.86841	8.96479	9.19816	9.26443	10.065	9.53943	11.3392	11.6281
HIR2	AT3G01290	AT3G01290	9.87718	9.50609	9.08935	10.2437	10.1968	11.985	10.0099	10.5293	10.7463	10.4982	10.3603	10.2158	11.437	10.546	10.4473	9.68539	11.281	9.04744	6.98943	7.23709	7.45976	10.7919	6.65657	11.4154	9.29567	11.8536	7.39571	3.27551	5.35894	3.48383	7.87806	8.5531	10.424	4.32015	3.57289	3.63188	9.459	9.03965	8.62241	8.96442	10.7836	10.2327	9.24879	10.2933	9.17966	6.70518	6.92542
PKT3	AT2G33150	AT2G33150	9.12224	9.08911	9.22343	12.458	12.2185	13.1166	11.3103	11.6878	10.8846	9.22382	9.76588	9.26284	11.1427	10.3927	10.3193	9.51892	10.1192	9.80314	9.26051	9.11984	9.19043	10.9233	9.74696	11.5704	10.1214	10.5867	9.51828	9.51466	9.61864	9.81194	12.1253	11.5071	12.2638	9.56294	9.60133	9.74614	9.50885	9.19991	9.81214	10.2533	11.0448	10.8316	10.558	9.80831	10.5024	9.12437	8.94592
AT3G05730	AT3G05730	AT3G05730	10.0691	11.5432	11.7559	3.22939	2.55818	7.64117	4.88412	8.5188	11.4305	11.1185	10.4072	11.7299	4.30616	4.77075	4.43659	8.12835	9.1323	7.07076	9.76481	9.58168	9.7513	4.43592	6.89122	3.96171	8.82162	8.44603	8.56753	4.55372	8.65708	3.48383	3.27946	2.80176	3.72721	7.26551	8.84338	4.8674	9.29287	10.6991	10.2142	7.61286	6.11432	8.63902	8.80873	10.5276	8.46143	10.5468	11.4256
AT5G36790	AT5G36790	AT5G36790	10.8537	11.1033	10.8305	8.3199	8.75805	8.30652	9.23044	8.06177	9.90945	11.155	11.2834	10.8366	9.3232	9.97811	9.43045	9.60183	9.64115	9.35495	10.8574	10.8467	10.6607	9.30678	9.83226	9.25738	9.76014	8.70721	9.4092	10.7526	10.8438	10.4551	7.82456	8.42169	5.59601	10.91	10.8151	10.3298	11.2747	11.1817	11.2172	10.576	9.98625	10.2111	10.3723	10.4233	9.96576	11.4128	11.498
SUC1	AT1G71880	AT1G71880	10.3245	10.4071	10.0017	9.24416	9.07858	8.79331	7.92199	7.44893	9.58361	11.1627	10.7956	11.2294	10.0338	9.15833	8.79064	9.1332	9.99802	8.19932	11.5287	11.9231	10.2955	9.60798	10.1305	9.71548	10.6483	10.162	9.70361	8.99385	8.55834	8.17845	9.52134	9.55873	5.9809	8.78103	9.26485	6.7787	10.0978	9.67972	9.23552	8.70121	9.87869	9.44291	8.66158	9.75005	8.35644	9.43695	9.5863
CYP89A2	AT1G64900	AT1G64900	8.65706	8.514	7.70073	8.16631	8.50396	8.55882	10.5268	10.1965	7.90584	8.85606	9.68277	8.35455	8.74421	8.65398	8.02929	10.2559	9.0735	10.8075	9.49612	9.89235	9.06755	8.5546	9.16535	8.67202	9.68184	10.5599	10.207	9.1276	8.85255	9.06093	8.66221	9.25612	8.56009	8.95476	8.90303	8.66006	9.48102	8.53657	8.7052	8.89648	8.94715	8.64619	9.79751	9.32947	11.514	8.55687	8.90466
PGLP1	AT5G36700	AT5G36700	10.8511	11.0949	10.8077	8.3199	8.74541	8.31568	9.21282	8.06943	9.89042	11.1365	11.2773	10.8254	9.30831	9.96432	9.43045	9.59635	9.63192	9.33396	10.8504	10.8315	10.6368	9.2967	9.8252	9.26419	9.75209	8.70037	9.40475	10.7465	10.8398	10.4477	7.80627	8.39645	5.53978	10.8968	10.8122	10.326	11.2716	11.1799	11.2147	10.5746	9.99271	10.2038	10.3691	10.4159	9.96043	11.4038	11.4923
AT4G01310	AT4G01310	AT4G01310	10.7342	10.9432	11.802	7.73991	7.90813	7.50364	9.74388	9.02358	9.64004	11.2685	10.8246	11.4023	9.13353	10.0358	9.85458	10.1609	9.25762	10.0512	10.9451	10.6323	10.9068	9.50372	10.2917	9.30108	9.01331	8.06074	10.3926	9.67227	10.199	9.77396	7.44187	8.50275	6.28444	10.2121	9.75912	9.63474	10.1537	11.1321	10.9821	10.3502	9.4591	9.86478	9.92111	9.9036	10.2301	11.4353	11.4089
AT5G47930	AT5G47930	AT5G47930	10.3702	10.5272	11.5872	10.3246	10.5014	9.74671	10.4745	10.5839	10.2749	11.2341	10.4151	11.0697	10.69	10.2326	10.4757	11.0777	10.5313	11.0749	11.2565	11.132	11.2746	10.0909	10.6853	9.80925	10.7886	10.8866	11.3795	10.3048	9.84899	10.1836	9.96221	10.3663	9.67821	9.83339	10.0446	10.2071	9.44466	10.6607	10.4014	10.1358	9.78994	10.0528	10.1904	10.175	10.7035	10.659	10.8189
AT5G10980	AT5G10980	AT5G10980	10.2521	10.3597	10.5186	10.4164	10.3613	10.9836	10.2142	10.391	10.2106	10.3386	10.3475	10.4855	10.5323	10.2603	9.96245	9.87925	10.106	10.3661	10.7782	10.6973	10.5333	10.3965	10.1589	10.9502	10.5215	12.1706	10.2671	10.2568	10.5427	10.1303	10.9279	10.3212	12.0127	10.5282	10.5542	10.4824	10.2439	10.203	10.3086	10.0297	10.3723	10.0866	9.83758	9.86538	10.5937	10.3216	10.3212
OMT1	AT5G54160	AT5G54160	10.0445	10.3736	9.94164	9.86531	10.152	8.62664	7.87793	8.65232	8.7802	10.6808	11.0554	10.1688	9.90713	9.0874	9.17435	9.11226	8.59995	8.59439	10.7534	10.1433	10.6432	9.3168	9.1765	9.40022	8.97235	8.47304	9.24463	11.0927	10.5821	11.4146	10.6451	10.5606	8.83584	10.9806	10.9641	11.8186	11.038	10.9515	10.8622	9.90885	10.4385	9.8431	8.72326	9.81946	8.67344	10.6337	10.841
AAS	AT2G20340	AT2G20340	8.28929	8.00553	6.75571	7.13197	7.42776	7.20155	7.04057	6.17571	6.87544	10.2321	11.9589	10.1644	8.30843	7.70186	6.79685	7.65717	8.75084	8.53254	11.304	11.452	10.7932	9.8616	9.44434	8.41487	11.0195	10.5699	8.67492	9.88046	9.16982	9.47022	7.80627	8.27248	4.9012	9.39704	9.19762	9.20888	8.88444	7.18104	7.93073	7.98822	7.87963	7.40553	8.29256	6.86672	7.17019	7.15693	7.43775
HTA9	AT1G52740	AT1G52740	10.7468	10.5193	10.792	11.5473	11.5181	11.3112	11.5925	11.8955	11.3972	10.3467	10.3118	10.5432	11.4848	11.2491	11.4281	11.3875	11.4343	11.3794	10.1426	10.0093	10.2066	11.153	11.3802	11.0253	11.0356	10.6766	11.2116	10.2558	10.3834	10.4753	10.5739	10.6558	10.0468	10.225	10.3478	10.5258	9.79413	9.9655	9.84147	11.0796	10.8616	10.8596	11.1313	10.7508	10.319	9.95409	9.94377
GHS1	AT3G27160	AT3G27160	10.5286	10.8889	11.721	7.82222	8.27669	7.64117	8.90346	8.37164	9.61707	11.5729	11.0227	11.3645	8.92293	9.57603	9.31523	9.42324	9.01221	9.18613	11.1983	10.8751	11.1093	8.8541	9.59321	8.79466	9.12135	8.17043	9.76133	9.48718	10.2732	9.12036	7.1972	7.45481	6.8902	10.2103	9.65115	9.39671	9.98564	10.9052	10.8231	9.92173	9.01856	9.36971	9.20622	9.57688	9.35921	11.0963	11.3852
ENODL17	AT5G15350	AT5G15350	11.1547	11.6383	11.7267	9.22268	8.77682	8.07796	8.27101	8.24206	10.0336	11.7953	11.0817	11.3296	9.91894	10.7777	10.4063	10.7138	10.1889	9.80314	10.8451	10.7103	10.4727	8.53185	10.1645	8.81335	9.41597	8.47304	9.99688	7.90361	9.1126	6.64579	6.67942	6.6168	4.9878	8.21004	8.44	7.57293	9.43341	10.9969	10.6202	9.8142	9.05196	9.21273	8.54115	9.31851	9.1099	11.0856	11.1694
LTI78	AT5G52310	AT5G52310	5.82908	5.4355	6.88586	5.85267	5.44899	6.79298	5.14427	7.53997	6.85315	9.44567	10.4038	8.03215	6.04034	5.73709	5.62635	6.93568	6.93259	6.85189	11.4368	11.3484	9.76692	6.03904	10.5674	5.98532	8.63882	7.44894	9.94725	9.95552	9.86374	9.91355	8.32598	8.77493	11.4278	9.44979	9.68175	11.7251	6.57354	7.33846	7.47067	6.39975	5.5857	5.83225	6.78309	7.26282	6.3373	5.87278	5.38955
AT4G23470	AT4G23470	AT4G23470	9.70517	9.80703	9.80845	10.791	10.6598	11.1541	10.9465	10.9627	11.2525	10.4885	10.1067	10.5111	10.9999	10.3265	10.6668	10.4298	11.5174	10.434	9.6251	9.42811	9.49873	10.9276	10.0312	10.8788	11.0592	11.0385	10.6624	7.90849	8.48046	8.1559	9.33939	10.0038	9.86997	8.51012	8.09444	8.38365	9.21617	9.47523	9.93907	10.1022	11.0218	10.5803	10.7256	11.463	10.717	8.85231	8.50873
RPS5B	AT2G37270	AT2G37270	9.90727	10.0976	11.1607	9.20963	9.29366	8.7193	9.82734	9.97176	9.39204	10.7352	9.83444	10.3647	10.0836	9.7966	10.1293	10.5878	9.72342	10.7878	11.0571	10.8888	10.8351	9.51537	10.3372	9.41865	10.1825	10.6088	11.0754	9.81174	9.02467	9.77987	8.9884	9.83245	9.24917	9.17391	9.37973	9.61015	9.46532	10.7506	10.4757	10.1477	9.41165	9.93575	9.76244	10.1802	11.1801	10.5881	10.6442
EMB3126	AT3G63490	AT3G63490	9.95846	10.3185	11.1176	8.61201	8.64001	8.94269	10.1655	9.54977	9.89315	10.7945	10.4139	10.8056	9.1603	10.2011	9.93669	10.6205	9.96164	10.6508	10.5226	10.1713	10.4127	10.0772	10.5557	9.74742	9.8178	9.1637	10.6332	9.78676	10.3119	9.81339	8.58387	9.14939	8.33907	10.3216	9.92284	9.87299	10.2393	10.9773	10.7822	10.7545	10.1865	10.6032	10.7762	10.3413	10.8219	11.277	11.029
AT1G13480	AT1G13480	AT1G13480	2	2.36602	2.59465	5.3168	5.38519	5.40323	3.40121	6.05742	4.05323	2	2	2	4.2069	3.43996	3.68113	2	4.26895	5.23998	2	2.23769	2.47612	6.03904	2	5.1638	3.00331	12.1125	3.8551	2	2	2.29232	2.77715	2.80176	5.48128	2.25118	2	2.50572	2	2.24104	2	3.05467	4.20334	3.3161	2	3.03108	4.45274	2	2
AT3G08520	AT3G08520	AT3G08520	10.5206	10.3623	11.841	10.4501	11.1301	9.76689	10.7734	11.0003	10.1248	11.2728	10.2802	10.9966	10.8578	10.7446	10.5898	11.1722	10.4746	11.1622	11.1313	11.1544	11.1718	10.1574	10.7861	10.1294	10.7153	10.6597	11.3604	10.3867	9.54236	10.4997	10.0169	10.823	10.6333	9.60018	9.99467	10.3485	8.92631	10.1421	9.87515	10.2102	9.44031	9.66274	9.8106	9.61834	10.1588	10.0794	10.6946
AT4G08555	AT4G08555	AT4G08555	7.69447	5.54663	4.7249	6.02145	6.87503	7.67003	7.41202	8.03854	8.03027	4.81976	4.31407	4.97544	7.82191	5.66098	8.19985	5.99043	6.32902	7.93424	4.06667	4.13846	4.81977	7.69286	3.6903	8.46301	5.17581	12.1048	5.5363	5.22066	5.79917	3.08615	4.4012	7.68065	6.97744	5.6771	6.08573	4.49009	6.45139	4.84455	5.03985	5.72342	6.64959	6.90548	6.84914	6.86672	8.82849	3.68411	3.9426
KCS10	AT2G26250	AT2G26250	11.1442	11.0742	11.0732	7.4604	7.71405	7.3868	9.3368	8.89151	10.2388	10.0059	9.3911	10.2706	8.66228	9.8954	10.1772	10.6063	9.82736	10.3333	9.80409	9.66297	10.2256	8.66846	9.90612	8.41487	9.20231	8.17373	10.5686	10.2568	10.3927	9.80906	9.01651	8.91183	8.13599	10.1916	10.3629	10.7193	11.1453	11.3407	11.0595	10.6552	9.99379	10.0483	10.4511	10.6526	10.5003	11.3147	11.257
DGR2	AT5G25460	AT5G25460	10.3612	10.7535	11.1222	3.22939	3.27336	4.33158	8.35697	7.74523	8.99394	10.6376	10.4882	10.171	6.09688	8.9179	9.81068	9.13131	7.9977	8.24503	9.51696	8.88426	10.3587	7.10647	9.52724	7.62921	7.10235	5.15543	8.86996	7.92786	9.51714	6.26255	3.05006	3.57625	4.9878	9.2677	8.21789	9.17784	9.64605	11.777	11.2791	10.8236	7.8703	10.353	8.73079	9.30588	9.47152	10.8231	10.8685
AT4G24350	AT4G24350	AT4G24350	7.45748	7.82622	7.23755	4.45477	4.2568	5.47039	5.48698	4.29643	6.02695	10.9089	11.591	11.2667	8.03222	7.19507	6.87643	8.29641	8.0374	8.22887	11.4972	11.3204	10.9267	9.34316	9.26533	8.36507	10.3755	8.9913	8.35098	6.80716	8.45943	6.21099	4.49552	4.44873	5.0695	7.88278	7.30096	6.13614	9.02383	7.52664	7.53453	7.71007	7.00543	6.81504	6.79271	6.40432	6.56291	8.27701	8.29313
ATNTT2	AT1G15500	AT1G15500	9.63498	9.84919	10.2074	8.72023	8.4109	8.67015	10.0854	9.98195	9.18453	9.60684	9.4204	9.54704	9.35542	9.69768	10.3136	10.87	9.6685	10.9888	9.60856	9.46368	9.71283	9.59433	10.2086	9.32407	9.45944	9.4649	11.0599	9.45583	9.35201	9.87404	8.75093	9.20616	10.0111	9.43242	9.34987	9.65291	9.41555	9.85765	9.55937	10.0017	9.46995	9.95705	10.222	9.77203	10.9606	9.91162	9.80388
GPX1	AT2G25080	AT2G25080	10.6537	10.5815	9.64894	8.72023	8.81364	8.75341	9.12319	8.34664	9.01418	10.6409	11.3599	9.69468	9.12336	9.36735	8.57859	8.46203	9.01221	8.22236	10.4401	10.8144	9.97292	9.03077	8.75737	8.8318	9.51596	8.2223	7.96317	10.6673	10.4875	10.0519	8.77933	8.74858	7.79537	10.3404	10.5555	9.65141	11.6931	11.1867	11.1191	10.0794	9.95238	9.74186	10.1243	10.2667	9.39575	10.8107	11.4289
AT5G64790	AT5G64790	AT5G64790	2.86851	2.36602	2.32775	3.6965	4.63146	6.18131	3.90125	4.49153	3.88764	2.38186	2.61326	2	2.99016	3.24519	3.81642	2.63379	2.32728	4.13064	2.24805	2.4417	2.66585	4.70351	2.87595	4.51216	3.14112	12.0929	2.83619	2.26661	2.28137	2.53528	3.27946	2.80176	4.36725	2.25118	2	2	2	2	2	2.62164	4.14264	3.49621	2.45261	2.23134	4.05606	2.24422	2
AT3G62530	AT3G62530	AT3G62530	8.96901	9.70489	10.9757	8.86595	9.17605	8.01187	9.78024	9.8074	8.57758	11.1067	10.486	11.0348	9.48552	9.65908	9.12632	10.4144	9.51628	10.5115	10.9571	11.0314	11.1037	9.1772	9.6503	9.15852	10.0411	10.263	10.4909	10.0325	10.1275	10.0531	9.28431	9.30666	7.94357	10.2028	10.0776	10.0342	9.81533	11.0797	10.7483	9.90777	9.22663	9.59518	9.82708	9.81501	10.9204	11.1161	11.2208
YCF37	AT2G23670	AT2G23670	11.1537	11.0842	11.2815	8.64469	8.67378	8.1918	9.0674	8.26892	9.74969	11.3471	11.0227	10.8841	9.58522	10.3234	9.83877	10.0136	9.5714	9.79658	11.3478	11.2148	11.1134	9.45921	10.3908	9.27771	9.88188	8.76519	10.1363	10.7567	10.47	10.2775	8.84798	9.15442	7.87706	10.5312	10.4908	10.1324	10.3374	11.0127	11.0459	10.3878	9.46995	9.78797	9.69861	10.066	9.75428	10.9909	11.5248
AT4G29905	AT4G29905	AT4G29905	11.9803	11.6425	11.0746	11.6706	11.8534	10.4065	10.4468	10.193	10.625	8.62312	8.75491	7.32901	10.5208	10.4131	9.50496	8.91974	8.36164	9.26748	9.99865	9.94047	10.272	9.09036	10.0705	9.76433	9.63448	8.38476	9.20166	11.6134	10.6142	11.2918	9.69785	9.68046	6.02253	10.0743	11.1778	10.7142	11.0209	10.9526	11.1325	10.9964	10.7116	10.1316	10.1573	10.274	9.99359	9.38695	10.2968
EXPA1	AT1G69530	AT1G69530	10.7328	10.6577	10.3907	7.51799	8.05886	8.48765	10.6744	7.47223	9.97801	9.5751	10.0342	10.8581	7.70855	9.32173	9.4669	7.46636	9.15825	7.57386	10.0081	9.94362	10.7026	8.02964	9.4942	8.35872	9.57644	8.24756	8.75927	7.81796	9.41526	5.14754	5.75387	7.53408	6.02253	8.72766	8.84112	7.2538	9.72989	11.3391	11.6541	10.7653	9.79117	10.2046	10.0531	9.56501	8.29489	10.9153	11.6188
AT5G60670	AT5G60670	AT5G60670	9.08762	9.5038	10.9823	7.54594	8.05886	7.01168	9.47482	9.70783	8.3656	10.3017	9.0163	10.0748	9.39259	9.85754	9.90098	10.7889	9.34156	10.945	10.4315	10.5927	10.5318	9.28654	10.0675	8.67713	9.62129	10.5643	11.0446	8.99615	8.42368	8.53009	8.35143	8.82937	6.67216	8.51012	8.72594	8.77237	8.71427	10.2269	9.68427	9.63816	8.55141	9.35227	8.94226	9.32165	11.0989	10.0921	10.2315
PNP-A	AT2G18660	AT2G18660	7.84714	5.83638	6.15651	10.6692	10.8342	12.6226	10.5081	11.265	11.5957	6.77415	4.38893	7.39882	11.1577	8.67831	10.1851	6.70086	11.1635	7.66315	4.55523	2.77939	6.09009	10.2263	6.16854	10.522	9.31218	10.1182	7.28384	2.85751	3.92581	5.28686	7.74998	8.2207	10.1229	2.65127	2.78088	3.63188	5.61024	6.80289	7.11737	8.75016	11.5261	10.19	10.8472	10.5718	7.77332	3.76464	4.05657
BBX15	AT1G25440	AT1G25440	10.9216	10.9003	10.3211	9.13798	9.24956	8.00055	8.11274	7.99092	9.39975	8.50295	8.43984	9.21634	8.8549	9.70006	8.58334	8.77948	8.25505	8.30484	10.5711	11.0319	10.5432	9.07864	9.58904	8.75653	9.87325	8.79333	8.61068	11.1977	10.9811	10.8352	9.09769	8.40069	6.47639	10.88	11.2326	9.70464	11.4449	10.624	10.6716	10.2952	9.92448	9.81262	9.87089	9.90779	9.66729	10.482	10.7078
Lhca6	AT1G19150	AT1G19150	10.7426	10.8352	10.3107	3.6965	3.93903	6.4038	7.46063	6.69472	9.11129	10.8023	10.8751	10.4494	7.12378	8.44293	7.7539	8.31984	8.39695	7.87733	10.1906	9.99719	10.0323	6.57232	7.89398	7.17411	8.50798	6.34203	8.07663	10.5051	10.7999	9.80181	4.30029	5.51161	4.9878	10.8157	10.7194	10.0491	11.0962	11.0374	10.9596	9.39976	8.45484	8.68617	8.90946	9.9439	8.80661	11.289	11.2887
PSY	AT5G17230	AT5G17230	11.5571	11.6601	11.3263	9.21399	9.59801	9.91589	9.30221	8.95079	10.6101	10.7606	10.848	10.6788	8.70382	9.10546	8.89368	8.39742	9.20631	7.9501	10.5438	10.4727	10.416	8.76426	9.11987	8.56027	9.34821	8.32966	8.51688	10.663	10.8871	10.7085	9.23047	9.29077	8.8123	10.9002	10.6572	10.8497	11.1687	11.0666	10.9798	9.51612	9.18208	9.21434	9.35002	10.1646	8.90495	11.1079	11.4049
RBP45B	AT1G11650	AT1G11650	10.7454	10.6792	10.5872	10.4239	10.3592	10.4172	11.1011	10.9007	10.6101	10.7249	10.7757	10.5041	10.496	10.5748	10.3833	11.2054	10.7847	11.1762	10.7627	10.6343	10.7241	10.4776	10.5428	10.5404	10.7728	10.8896	11.131	10.7928	10.664	10.8536	10.4919	10.6245	11.6323	10.5901	10.7021	10.5877	10.648	10.6864	10.8025	10.4417	10.5435	10.3898	10.9203	10.9688	11.1281	10.5888	10.6702
P5CR	AT5G14800	AT5G14800	7.81576	7.86248	9.00018	8.88795	8.79535	8.18181	10.4256	10.0474	8.75638	7.81122	7.52436	8.04188	9.4908	9.59405	10.2671	10.3146	9.51226	10.7096	8.46632	8.63671	8.49422	9.56662	9.94739	9.36582	9.81909	10.1587	10.8253	8.04337	7.41877	8.43592	8.87893	9.5454	10.1769	7.69958	7.81506	8.40167	7.74364	8.34655	8.48049	9.85057	9.1086	10.0591	9.78792	9.49718	11.3345	8.28044	8.02563
MO1	AT4G15760	AT4G15760	8.15363	6.98241	5.69905	5.93953	5.73148	7.16146	8.19045	9.77965	7.64545	8.72994	8.90593	8.72144	8.54525	6.623	8.97547	8.16947	7.94501	9.07482	8.73123	8.5456	7.87941	8.01331	7.33111	7.6708	7.67324	12.0572	7.1413	7.35709	8.39813	6.98968	6.69938	8.33137	7.05971	8.02018	7.70516	5.26402	7.86345	7.32543	6.6252	7.30746	8.2897	7.60026	7.18497	7.49753	10.0412	7.11914	7.25881
AT5G59690	AT5G59690	AT5G59690	9.83867	9.73454	10.8961	10.062	10.1327	9.29738	10.4171	9.28608	9.15295	10.4702	9.70492	11.014	9.73301	10.0168	9.51245	9.76804	8.85289	10.0177	9.98376	9.9572	10.4631	9.70267	9.76553	9.75469	8.82162	9.46221	10.301	9.95905	10.2106	9.54673	9.13113	9.6995	13.5268	10.0288	9.99873	9.49232	8.87971	9.52736	9.53616	9.39362	9.41486	9.20303	8.78241	8.4445	9.35458	10.2341	10.0662
ERD7	AT2G17840	AT2G17840	7.88795	7.10853	5.7271	6.91335	7.00805	8.38695	6.79736	7.30059	7.32748	11.8956	12.4907	10.1963	8.74862	6.68196	8.11052	9.37292	9.90452	9.48174	10.5496	10.075	8.93091	8.16143	9.80917	8.5713	8.10245	8.9649	9.28998	8.18694	8.05453	8.22251	7.13994	7.18694	8.70774	7.34192	7.65464	9.30776	6.7183	5.25503	6.10887	6.74705	7.84194	6.61515	7.05506	6.65397	6.3373	4.96804	5.8028
FDH	AT5G14780	AT5G14780	10.2945	9.43323	9.21602	11.573	11.8393	11.6915	10.7467	11.335	10.6315	8.24501	9.72312	7.81667	10.8268	9.70954	9.43309	8.9263	9.21869	9.1659	7.77719	8.08712	7.99005	10.015	8.64146	10.5178	9.55039	9.84587	8.34402	10.4542	10.1175	11.1945	12.2064	11.9028	11.3563	10.2684	10.561	10.9382	10.491	9.78338	10.5935	10.3769	10.9856	10.7546	10.3225	9.51238	10.6411	8.06285	8.50873
AT1G13360	AT1G13360	AT1G13360	10.397	9.46894	8.38607	11.7916	12.0844	11.8886	11.0963	10.8065	10.2345	9.31449	11.133	9.03089	10.832	10.2763	10.0232	9.15942	10.2968	9.6778	10.1378	10.8778	9.80903	10.6786	9.88928	11.2934	10.5434	10.7711	9.42357	11.2419	10.2802	11.6209	11.5707	11.2947	12.4748	10.5533	10.7534	10.8517	8.89853	7.7911	7.96821	8.89648	9.63742	9.19979	9.23826	8.50376	9.18619	7.6563	8.04648
AT4G27654	AT4G27654	AT4G27654	11.0212	9.27813	5.11296	3.22939	4.73746	4.33158	3.29799	5.08222	4.33641	10.8295	12.569	10.3432	8.1235	6.56153	6.67751	6.69063	5.97907	7.39425	8.76148	10.4922	9.01181	5.86798	5.56777	4.6009	3.77021	7.23835	4.72862	9.49369	10.4823	6.26255	3.47734	3.45111	4.36725	8.72766	7.88248	5.02452	5.15798	4.69052	2.85014	2.62164	2.96259	2.41261	2.94207	3.14893	2.33709	5.35369	5.8028
GLX1	AT1G11840	AT1G11840	9.12224	9.42356	9.81337	10.1512	10.6496	9.23114	9.77064	9.52769	9.59037	10.6321	10.9207	10.8492	9.90515	9.58378	9.53959	10.3893	10.2002	10.042	11.1434	11.2926	11.0301	9.43183	10.4935	9.19104	10.9462	9.87857	10.5531	10.896	11.121	10.7085	10.801	11.3312	9.91211	11.066	11.2092	11.3228	10.6494	10.2835	10.5525	10.3644	10.3465	10.1883	10.4982	10.122	10.6637	10.6662	10.7655
UGT73C6	AT2G36790	AT2G36790	7.93739	7.72746	6.3128	5.03062	5.01546	5.91814	8.308	9.31215	5.98656	4.47128	4.15157	5.33335	6.04034	5.80939	6.0672	7.62528	4.54555	8.88577	4.35817	4.75087	4.1122	6.33018	3.6903	6.59466	4.63782	11.8911	6.93455	6.46661	7.07607	5.66446	7.22499	7.60923	7.01916	7.17727	7.0426	5.02452	7.36488	6.34169	6.26759	6.07034	5.75747	5.67285	6.02621	5.51546	10.7571	6.2397	6.5112
AT1G58684 AT1G59359	AT1G59359	AT1G59359	9.43952	9.65409	10.625	9.02832	9.30664	8.65579	9.81454	9.87016	9.19786	10.114	9.35655	10.0569	9.7984	9.78544	9.64106	10.7543	9.77632	10.8905	10.4702	10.5813	10.5241	9.6107	10.057	9.19461	10.1563	10.7808	10.9332	9.64473	8.91309	9.5742	9.58172	9.71829	9.91211	9.13149	9.3451	9.42166	9.47789	10.46	10.2123	10.0592	9.85287	9.9445	10.1703	10.028	11.3462	10.4678	10.3853
AT1G58983	AT1G58983	AT1G58983	9.43952	9.65409	10.625	9.02832	9.30664	8.65579	9.81454	9.87016	9.19786	10.114	9.35655	10.0557	9.7984	9.78544	9.64106	10.7543	9.77632	10.8905	10.4702	10.5813	10.5241	9.6107	10.057	9.19461	10.1563	10.7808	10.9328	9.64473	8.91309	9.5742	9.58172	9.71829	9.90933	9.13149	9.3451	9.42166	9.47633	10.46	10.2113	10.0592	9.85287	9.94353	10.1694	10.028	11.3459	10.4678	10.384
AT1G58684 AT1G58684	AT1G58684	AT1G58684	9.43952	9.65409	10.625	9.02832	9.30664	8.65579	9.81454	9.87016	9.19786	10.114	9.35655	10.0557	9.7984	9.78544	9.64106	10.7543	9.77632	10.8905	10.4702	10.5813	10.5241	9.6107	10.057	9.19461	10.1563	10.7808	10.9328	9.64473	8.91309	9.5742	9.58172	9.71829	9.90933	9.13149	9.3451	9.42166	9.47633	10.46	10.2113	10.0592	9.85287	9.94353	10.1694	10.028	11.3459	10.4678	10.384
GLU1	AT5G04140	AT5G04140	10.4319	10.9609	10.638	8.2366	8.16715	8.75341	9.15122	8.23526	10.0136	10.7383	10.9915	10.5155	8.79208	9.4685	9.31809	9.37292	9.54016	9.40327	10.5233	10.4508	10.2434	9.32012	9.55099	9.21584	9.56271	8.57382	8.97576	10.6979	10.6078	10.1958	7.96305	8.33137	6.44612	11.0334	10.7854	10.3725	11.3278	11.1321	11.2767	9.86397	9.88218	10.0356	9.98965	10.4486	9.86918	11.2898	11.392
SHD	AT4G24190	AT4G24190	9.37639	9.54454	9.83287	9.17425	9.13785	10.4632	9.52139	9.10411	11.2588	9.71275	9.26759	10.1064	10.8952	10.6966	10.1928	9.44624	11.3462	9.18613	9.63603	9.43709	10.2462	11.3689	9.9555	10.8654	11.4924	10.6737	9.8042	9.11498	9.34438	9.46656	10.2461	10.2206	8.43467	9.45135	9.34669	9.32297	9.25503	10.0431	10.7361	10.3589	11.3383	11.0465	10.6469	11.6125	9.47686	10.1125	9.5934
ndhJ	ATCG00420	ATCG00420	11.4081	11.4019	10.9198	8.13904	8.58428	9.28344	9.16045	8.45589	9.75571	11.5374	11.8748	10.7188	9.12336	8.92198	9.56624	9.37931	9.99514	9.22575	10.9707	10.7965	10.3604	8.6045	9.62611	7.85347	10.2762	8.93801	8.42097	10.6937	10.9317	10.412	7.06502	8.65946	6.24981	10.7161	10.2886	10.3448	8.55433	8.03865	8.44438	6.97003	6.93558	6.62487	7.22816	7.80635	6.09218	7.84405	8.47325
NUDT21	AT1G73540	AT1G73540	12.0942	11.134	8.44216	7.30551	7.34634	8.90677	7.0722	8.90442	7.53776	10.5759	10.9862	11.296	9.05008	9.4629	8.98985	5.92208	5.66833	6.16154	10.4102	10.9243	10.593	7.88458	6.64056	7.44971	5.61489	9.16867	5.43518	10.6986	11.5121	8.63814	7.51124	6.32741	6.64577	10.486	10.4108	7.85517	9.69263	9.51307	8.25646	6.81304	6.84323	6.7276	7.49894	7.56268	5.97633	9.74672	10.0713
AT4G10480	AT4G10480	AT4G10480	10.0557	10.2667	11.2087	8.87699	9.27178	8.7193	9.66312	9.47675	9.31258	10.8429	9.97168	10.6191	9.8404	10.0072	9.69911	10.8127	9.75607	10.5128	11.0325	11.0999	10.989	9.42876	10.3272	9.26079	10.1825	10.3057	10.952	9.63887	9.14369	9.75158	9.37394	9.7634	10.0136	9.38888	9.44956	9.5977	9.5849	10.9793	10.5142	10.1459	9.55829	9.74074	9.8652	10.1166	10.8628	10.9268	10.9574
CYP86A2	AT4G00360	AT4G00360	11.6167	11.5883	10.649	6.75473	7.34634	7.95437	7.80451	7.37666	10.0966	10.7515	10.9395	10.1087	7.927	9.11975	9.49743	10.1636	9.95425	9.59323	10.8421	10.7713	10.4924	7.33386	9.79658	7.20275	9.81136	8.6132	9.30319	11.1407	10.9982	10.0975	6.65919	6.9646	5.80125	10.499	10.9107	11.0004	11.305	10.7657	10.7934	9.67918	8.94936	8.84833	9.96219	10.4551	9.67567	10.0725	10.4943
ZAT11	AT2G37430	AT2G37430	4.10538	2.36602	3.47787	3.48176	3.74934	4.4693	3.82904	4.8169	4.20176	6.14292	5.43291	6.04453	5.04153	3.01997	3.9401	3.76147	5.41639	5.07623	3.70097	2.23769	3.97545	4.53074	3.41708	3.66513	3.58938	12.0547	3.2072	2.26661	2.719	2.29232	2.77715	2.58061	4.71064	2.96415	3.28473	2	4.95715	4.95017	4.07405	2.23822	3.53486	2.58173	4.33733	4.27094	4.10101	3.075	2.96199
NFXL1	AT1G10170	AT1G10170	7.25399	7.24662	7.15733	7.77576	7.53454	8.2503	9.4175	10.1913	7.72125	6.70879	7.12522	6.53263	7.83027	8.36111	8.40699	9.48526	8.28362	10.4619	6.72866	7.07023	6.95917	8.46138	7.8667	8.50386	7.83939	11.767	9.45619	7.19066	6.80314	7.38817	7.89546	7.61653	9.49814	7.1153	6.89372	6.86437	7.21526	7.18104	6.98651	7.79183	8.08312	7.95236	7.98365	7.9714	10.86	7.18646	7.0407
EDA39	AT4G33050	AT4G33050	10.4456	9.98366	8.94451	10.1804	9.96283	11.3055	9.91824	9.9491	10.6462	9.41526	9.07982	9.53675	10.9595	9.76967	9.90478	9.09878	10.5412	9.53528	7.82093	7.29747	8.05512	10.4521	7.99819	10.4083	8.95843	11.9963	8.04552	7.4471	7.88615	7.79067	9.6854	9.96137	10.774	8.14174	7.50866	7.10335	9.45264	8.85709	8.15042	8.97682	10.2126	9.51127	9.5044	10.2404	9.05955	7.29888	7.55874
AT5G55450	AT5G55450	AT5G55450	9.0611	8.2874	9.65443	8.72023	8.96315	10.4508	9.19497	10.2582	11.3282	8.27355	6.43688	10.0031	10.6337	9.05059	9.68592	7.98912	11.4648	7.57897	6.60065	4.82567	8.21553	9.84324	8.35784	9.69295	10.3357	9.18347	9.24338	3.14917	3.44507	4.99331	8.05884	8.77493	4.49102	4.37407	2.78088	3.176	7.25232	8.88399	8.87266	9.06651	10.8953	10.1384	10.5208	11.7702	8.32125	7.17177	5.76976
AT4G36648	AT4G36648	AT4G36648	8.68048	8.44873	7.89874	10.1073	10.2759	11.0915	10.1018	10.018	9.81169	10.0262	10.6699	9.55725	10.4775	9.26501	9.89144	9.34708	10.6722	9.56519	9.98162	10.1118	9.46081	10.1611	9.78388	10.5846	10.7555	12.0194	9.2996	9.87423	10.0464	9.91355	10.3381	10.2953	11.7227	9.92881	9.604	9.96434	8.21836	7.57697	7.67147	8.16468	9.70195	9.10582	9.6034	8.75209	8.37257	8.02248	8.21551
AT3G47370	AT3G47370	AT3G47370	9.88979	10.0869	11.0267	9.11484	9.46931	9.07266	9.6303	9.50809	9.53193	10.7093	9.99733	10.2819	9.91894	9.37034	9.5566	10.394	9.77297	10.3647	11.0387	10.9595	10.9033	9.09812	10.1001	8.85904	10.2488	10.211	10.7758	9.61964	8.73205	9.40861	8.60518	9.44641	8.88743	9.05101	9.26821	9.37681	9.56442	10.8948	10.6407	9.90129	9.45754	9.53978	9.72524	10.3242	10.9564	10.7277	10.9838
CRT3	AT1G08450	AT1G08450	9.61992	9.00727	8.72556	10.5466	10.3299	11.5346	11.2267	10.7845	11.5797	9.17019	9.00147	9.14138	11.1393	10.2474	10.1064	9.31078	11.5521	9.67064	8.52921	8.29555	8.88869	10.6992	9.06992	10.5981	11.3786	10.6685	9.39468	7.95172	8.14511	8.40566	9.61098	9.89385	7.21139	8.15335	7.97186	7.93159	8.94001	8.66104	9.33211	9.63295	10.9725	10.3653	10.7073	11.2284	9.86674	7.77283	7.63411
AT1G18740	AT1G18740	AT1G18740	11.4487	10.7963	8.48387	8.32797	8.5189	8.94269	8.2119	8.52995	8.89921	11.7283	12.1334	11.3804	10.2826	9.64926	9.52978	10.0075	9.96311	9.90021	10.5394	10.7659	10.5103	8.38729	7.98557	8.3964	8.43616	10.1916	8.33937	9.82472	11.1042	8.00766	7.67134	7.30916	7.21139	9.85725	9.50765	7.64127	9.25137	9.5188	8.58068	8.00041	8.19945	7.94462	8.0413	8.35537	8.08718	9.73802	9.6535
KAT5	AT5G48880	AT5G48880	6.84115	7.89085	8.88349	6.77849	6.59384	6.22086	4.81102	5.85953	6.96131	10.3746	11.3441	10.1952	7.7176	7.28656	6.60461	7.93811	7.83989	7.74724	11.5081	11.6457	10.7308	9.05889	10.1881	7.76982	9.90262	9.00433	8.89715	9.1971	8.73497	8.4471	10.4948	10.2666	6.74856	9.2188	8.92877	8.5705	9.34526	8.12389	8.43437	7.80115	6.79474	6.84859	6.85833	7.73276	6.79263	8.87743	8.7733
AT3G22600	AT3G22600	AT3G22600	5.50109	3.72698	5.23523	12.153	12.2401	12.1394	8.88132	8.19381	8.59784	2.68351	4.71413	3.07536	10.2841	7.89697	8.76159	3.59583	8.39695	4.01479	3.52406	3.1723	4.69466	9.33333	4.11799	10.4933	6.72883	10.9931	4.00376	3.39167	2.89638	3.36305	7.75952	7.30012	12.1915	2.25118	2.78088	3.30417	3.64452	4.15546	3.68138	8.00848	11.2959	10.008	7.43279	8.84014	6.18905	3.19608	2.70664
AT5G22580	AT5G22580	AT5G22580	11.162	10.3264	11.5187	4.19717	4.10664	5.01055	8.53774	8.72203	9.52136	11.5256	10.1026	10.9437	6.75357	6.82833	8.90511	9.55039	9.33019	8.41463	10.923	10.4742	11.1496	9.12116	9.6523	7.70123	9.51438	8.29979	9.98798	7.58769	11.2228	3.97084	3.65132	2.99347	3.25491	9.80422	8.89217	8.04601	9.77388	11.0264	10.7038	8.80909	7.41134	8.85454	9.20622	9.28511	7.58048	10.1391	10.1031
AT5G43460	AT5G43460	AT5G43460	10.3189	9.96544	10.04	11.5974	11.4613	11.3751	11.4223	11.911	10.9969	9.54499	9.66782	9.66507	11.5175	11.0693	11.2543	10.8796	10.9793	10.9921	9.34949	9.33676	9.5568	11.1568	11.169	11.2059	10.6584	10.8592	10.7615	9.6894	10.0095	10.0097	10.0658	10.4454	10.1998	9.82494	9.89591	10.1129	9.45741	9.51307	9.37285	11.012	10.8342	10.88	10.9049	10.6476	10.4813	9.33186	9.45215
AT1G69252	AT1G69252	AT1G69252	11.0155	9.97706	9.18348	10.807	11.1756	10.795	11.2385	11.1074	10.625	8.36124	9.79885	8.24508	9.87718	9.14442	9.32661	10.0551	9.98067	10.3089	8.06684	8.3345	8.27137	9.40079	9.74509	9.28107	9.78269	9.56497	9.63497	11.1241	10.421	11.6246	9.55459	10.571	10.898	10.1066	10.4528	11.7857	9.73644	8.99098	9.10491	9.47303	9.88101	9.18016	10.5831	10.1417	10.0936	8.38921	8.81033
LTPG2	AT3G43720	AT3G43720	11.1516	11.3846	11.1684	6.30928	6.0522	7.22118	7.68687	8.17972	10.0508	11.4669	11.0475	10.9815	8.08209	9.98398	10.0109	10.3901	10.2649	9.85565	11.1941	10.8618	10.9394	7.83899	10.6417	8.071	9.85709	8.65862	10.0899	9.67657	10.0239	8.133	6.26306	6.55732	6.59149	9.60723	9.78166	9.78373	10.3965	10.9404	10.7429	9.79217	8.66368	8.80627	9.02419	9.76397	8.94248	11.0169	11.2487
AT2G05220	AT2G05220	AT2G05220	10.2245	10.4218	11.4114	9.52961	9.76083	9.49983	10.6052	10.6695	10.1929	11.3008	10.5547	11.2505	10.4614	10.6119	10.4884	11.0119	10.438	10.9811	11.1685	11.1186	11.1932	10.3615	10.9165	10.1662	10.6519	10.417	11.11	10.2424	10.0523	10.107	9.64739	9.88178	8.4035	9.98295	10.1971	10.3232	9.87713	10.9642	10.5014	10.3893	9.89833	10.1998	10.2957	10.2186	10.461	10.8272	11.0114
OHP	AT5G02120	AT5G02120	11.7346	11.4972	11.5237	9.64394	9.91562	9.44661	9.88078	9.67557	10.5782	11.1733	11.3239	11.004	9.43158	10.0894	9.11324	9.58672	9.84184	9.51942	10.6688	10.4735	10.5041	9.33004	9.55099	9.57742	9.75344	8.52043	9.46156	10.673	10.7488	10.114	9.10144	8.88486	6.47639	10.5915	10.7825	10.0875	11.0554	11.0563	11.3602	10.1676	9.95017	9.65447	10.2537	10.3242	9.73748	11.2193	11.7006
AT3G45030	AT3G45030	AT3G45030	9.89481	10.0746	11.3924	8.89883	9.41444	8.55882	10.2808	10.4032	9.30028	10.6583	9.79197	10.6215	10.1284	10.4686	10.4934	10.8969	9.60198	10.9893	10.7146	10.7642	10.8566	10.089	10.6061	9.79991	10.1172	10.4239	11.0712	9.92452	9.38025	10.1128	9.10144	9.34674	7.15636	9.50067	9.65372	9.85479	9.43824	10.673	10.3168	10.4085	9.55539	10.2524	9.81886	9.76743	10.9348	10.6304	10.7863
SKP1	AT1G75950	AT1G75950	11.3563	11.0271	11.1308	11.9011	11.9133	12.0078	11.558	11.5515	11.2893	11.4657	11.4495	11.2411	11.2939	11.3411	10.9122	10.8221	11.1545	10.9998	11.4516	11.5583	11.2864	11.41	11.1822	11.5101	11.2762	11.4397	11.0478	11.4815	11.1194	11.2804	11.4225	10.9869	11.1744	11.1149	11.3456	11.5559	10.7106	10.6516	10.8256	10.9887	10.926	10.8607	10.8367	10.6488	10.8227	10.5049	10.6612
AT3G52960	AT3G52960	AT3G52960	9.82034	10.3723	11.3886	7.35375	7.88525	6.91854	7.64542	8.04632	9.05381	11.1733	10.8279	11.2641	8.72191	9.08012	8.69291	9.64089	9.40146	9.21759	11.1226	10.8579	11.0637	8.29576	9.61591	8.31348	9.40404	8.31779	10.0079	10.0336	10.477	9.62268	8.3949	9.24202	7.58922	10.3739	10.0938	9.6649	10.0269	10.7663	10.6312	9.88165	8.69836	9.51649	9.52331	9.91923	9.27591	11.2313	11.0481
ARFA1D	AT1G70490	AT1G70490	10.6596	10.8038	11.2211	11.3101	11.3319	11.0862	10.5023	10.5932	11.3591	11.5327	11.3452	11.3659	11.156	10.9171	10.9586	10.5508	11.4396	10.3142	11.4558	11.4902	11.36	11.004	11.3645	11.0755	11.3821	10.6396	10.6059	10.9778	11.1076	10.6435	10.5033	10.8968	10.5521	10.8933	11.031	11.2521	10.9572	11.2319	11.2551	11.1849	11.0776	11.1451	11.3161	11.4743	10.2263	11.0479	11.3416
TCH4	AT5G57560	AT5G57560	11.4932	11.4822	9.3048	7.41566	8.03827	6.53509	7.72716	9.13365	7.959	11.8375	10.7696	11.145	10.3022	10.0301	9.4797	10.0621	7.93903	9.29878	10.4816	10.1044	10.2554	7.77263	7.46444	7.76022	5.83397	10.3191	7.65378	7.86394	10.1474	5.73916	8.65712	7.13703	10.2941	7.98162	7.50296	7.13817	10.3391	11.4602	10.2678	7.70014	8.16552	7.98666	8.72577	8.56069	9.67382	10.1938	9.77504
OASA1	AT4G14880	AT4G14880	11.0074	11.0437	11.1747	11.5369	11.8489	11.7934	11.1566	10.795	11.128	11.6876	11.8695	11.641	11.6397	11.1766	11.0601	10.8818	11.1364	10.7823	11.5735	11.2873	11.4126	11.4919	11.2371	11.4738	11.3764	10.63	10.89	10.9714	10.7189	11.2876	11.1866	11.6099	10.854	10.7824	10.9411	10.8312	10.9369	11.0087	11.1827	11.2796	11.5126	11.4315	11.4601	10.7687	10.802	11.0418	10.9729
RACK1B_AT	AT1G48630	AT1G48630	8.61514	9.21504	10.6906	7.47502	7.64762	7.27853	9.26506	9.39984	8.25943	10.1328	8.90593	9.81589	8.90325	9.11263	9.2893	10.4603	9.44849	10.5581	10.5846	10.6087	10.5056	8.71463	9.88249	8.45113	9.64755	10.5849	10.827	8.25371	7.82169	7.88142	7.91266	8.43	7.17494	7.84986	8.09064	7.90656	8.5454	10.4859	9.7204	9.44357	8.70887	9.21915	9.30366	9.75587	10.9503	10.269	10.4083
cpHsc70-2	AT5G49910	AT5G49910	10.5351	10.8827	11.3798	8.59873	8.8317	8.49574	8.94249	8.71716	9.78838	11.1988	10.8229	10.9437	9.27194	9.47685	9.09006	9.89494	9.74584	9.59953	11.1129	10.9729	11.0531	9.1772	9.50971	8.89896	9.71946	8.90069	10.0704	10.6773	9.93021	10.0868	8.9347	9.22779	7.53273	10.0497	10.1266	9.5977	10.2685	10.97	10.9189	9.45247	9.11256	9.4701	9.22943	10.1274	9.4843	11.2357	11.274
SQP1	AT5G24150	AT5G24150	11.7637	11.488	10.777	10.7405	10.8312	9.36071	9.08106	7.74523	10.0286	9.25564	10.4646	8.52034	9.76825	9.04311	7.7284	8.66911	8.54985	9.0382	9.87151	10.3162	9.07593	9.01035	9.55954	9.73031	9.13997	9.13524	8.83731	11.3482	10.6823	10.3617	10.8564	9.72675	9.90933	10.9371	11.1507	10.4815	11.5568	10.3201	10.8782	9.56891	9.79611	9.09013	9.42619	9.85132	10.1468	10.3438	10.7801
VHA-A	AT1G78900	AT1G78900	10.3227	10.4084	10.6005	10.8468	10.7417	10.4958	10.5752	10.288	10.6861	10.8247	10.9302	10.7628	10.6831	10.5852	10.6039	10.8056	10.903	10.7137	10.9005	10.6581	10.7134	10.4059	10.864	10.3882	10.952	10.2814	10.8525	10.8157	10.8089	10.8916	10.8564	11.2443	11.6565	10.7699	10.843	11.1113	10.8597	10.9371	11.2327	10.8808	11.0302	10.9367	10.9192	11.0948	11.1291	10.9983	10.8199
VAR1	AT5G42270	AT5G42270	11.3922	11.3051	10.9168	9.19646	9.45773	9.27407	9.45246	9.00373	10.2084	10.8934	10.927	10.5953	9.01383	9.39991	9.20241	9.13697	9.66126	9.01953	10.551	10.3506	10.3536	8.92127	9.3831	9.18746	9.73723	8.41293	9.17708	11.0303	10.6724	10.7565	9.7961	9.58317	9.40286	11.0874	10.8458	11.163	11.0684	10.9296	11.1692	9.86952	9.5842	9.57152	9.91671	10.3567	9.78732	11.0718	11.2681
THIC	AT2G29630	AT2G29630	11.0051	10.466	9.73263	9.30267	9.03766	8.79331	10.4566	9.09288	9.90675	8.24501	9.2451	7.99756	9.21879	9.63192	9.32661	10.4237	9.4058	10.3325	8.54089	8.93371	8.57336	9.80344	10.2659	9.52736	9.92426	9.60337	10.3831	10.8261	9.73111	11.2126	8.66221	9.22061	6.84451	9.9456	10.5521	10.9974	10.5428	9.01957	9.61211	10.205	9.98084	10.0822	10.2493	10.0836	11.0403	9.24681	9.31573
IIL1	AT4G13430	AT4G13430	9.13501	9.5423	9.45915	9.56076	9.7064	8.83213	10.4271	9.84806	9.4563	10.0495	10.8033	9.94726	10.0906	9.88916	9.49491	10.6624	10.2968	10.6701	10.0809	10.1997	10.2237	9.79391	9.97957	9.59913	10.7063	10.2364	10.6708	10.135	9.94036	9.71039	9.60041	10.5115	9.74811	10.1371	10.4357	9.84033	10.6121	9.73125	9.99461	9.85617	10.2006	9.92498	10.6822	10.1336	10.8592	10.0745	10.2361
ZKT	AT1G55480	AT1G55480	10.8817	10.939	10.6268	8.5234	8.80147	8.48765	8.95526	8.30831	9.66585	11.1185	11.1519	10.6827	8.99536	9.39404	8.73194	8.97982	9.5656	8.68246	10.799	10.7947	10.4234	8.54895	9.13709	8.99623	9.68607	8.28462	8.93313	10.8548	10.9241	10.4477	8.42517	8.51843	6.82112	10.8974	10.8786	10.6851	10.9139	10.9573	10.9648	9.74344	9.34249	9.34494	9.6345	10.0067	9.38897	10.9847	11.2412
AT4G29410	AT4G29410	AT4G29410	8.9832	9.01374	10.48	8.41391	8.83767	8.27869	10.375	10.4727	8.89921	9.79772	8.97741	9.79447	9.3113	9.45165	9.74223	10.3418	9.5441	10.8097	10.2795	10.2327	10.2692	9.22407	9.96035	8.97148	9.92545	10.4915	10.8295	9.04575	8.34178	9.00147	8.63138	9.10594	8.67548	8.77102	8.7835	9.19654	8.94001	10.2495	9.77165	9.96901	9.27692	9.7171	9.7452	9.78233	11.2867	10.0685	10.2496
AT2G43550	AT2G43550	AT2G43550	5.50109	6.80001	6.68594	4.45477	4.2568	4.00905	4.65269	4.88794	4.57302	10.0869	10.6586	9.8851	6.91951	7.15401	6.0672	7.78295	6.89604	7.59418	11.4096	11.6121	11.022	8.09316	10.195	7.20275	9.58401	8.6132	8.66193	6.75388	7.99732	5.41391	4.66745	4.51275	4.605	7.88743	6.81308	5.7871	7.23761	7.25848	6.69392	7.30091	6.13004	6.53501	7.06304	6.17351	5.91472	8.14034	8.1464
AT2G23270	AT2G23270	AT2G23270	3.16264	2.65772	2.59465	5.60948	6.13212	7.76672	4.88412	5.30624	4.05323	3.49474	2.33897	2.91518	5.25533	2	4.51825	2.79537	4.01998	5.38703	2.64413	2.23769	2.25761	4.53074	2.63859	3.66513	2.26414	11.9949	2.60744	2.26661	2.719	2.53528	2.77715	2.80176	7.70878	2	2.23823	2.50572	3.11094	2	2	2.78086	4.20334	4.26531	4.28374	3.03108	4.84507	2	2
CAO	AT2G47450	AT2G47450	10.4474	10.6201	11.033	8.39097	8.41889	8.47952	10.6133	9.56068	10.1294	10.9739	10.7956	10.6756	9.31726	10.27	9.98237	10.687	10.053	10.7241	10.7344	10.5368	11.0018	9.56101	10.149	9.48135	10.1328	9.22696	10.7182	9.80652	10.4515	9.62597	8.7652	8.42585	7.3649	10.4768	10.1051	9.4771	10.53	11.2419	10.8578	10.1631	9.5899	10.1417	9.8106	10.3636	10.117	10.949	10.6836
AT3G46080	AT3G46080	AT3G46080	6.37981	5.03911	2.32775	8.17528	8.35372	9.45907	6.45754	6.65454	7.02252	5.29096	5.20328	5.8141	7.84685	6.9128	7.85166	3.91004	4.41387	5.47734	3.9313	4.58852	3.74244	8.71463	3.80968	9.49009	4.00497	11.9956	4.98861	4.69609	4.2206	2.53528	5.54919	4.07746	6.31826	3.09835	3.48308	2.70465	3.34851	4.09534	3.14013	6.20284	7.49264	7.88525	3.41051	4.37135	5.42475	2.24422	2.70664
AT1G67860	AT1G67860	AT1G67860	10.2443	10.059	9.4124	11.9239	12.2407	12.672	10.4347	9.94494	9.90404	9.99911	10.7042	9.55725	10.3855	9.74914	8.63917	8.33635	9.83059	8.06378	9.66565	10.1015	9.18268	9.89317	7.70672	11.3091	10.2612	10.5345	7.52026	11.0398	11.0031	10.0531	10.8675	10.0341	8.93725	10.9236	11.4924	10.7264	10.5906	9.22292	9.45434	8.47823	9.95459	9.49017	9.19356	9.22264	8.48706	9.50299	9.89672
AT4G21570	AT4G21570	AT4G21570	8.82933	8.31905	7.7218	9.57779	9.66334	9.33841	8.20478	7.8907	8.21642	11.4816	12.3438	10.3686	9.58027	8.36711	8.13661	9.15011	9.26958	9.3203	11.1481	11.0269	9.97516	8.64745	9.91614	8.3964	9.56117	9.18999	9.2055	9.29359	8.92848	9.71039	8.6824	9.23492	9.20014	8.96797	8.97481	10.1634	8.74319	8.18646	8.4934	8.56832	9.35257	8.63902	8.47396	8.32126	8.47856	7.96826	8.03262
ABA1	AT5G67030	AT5G67030	11.0917	10.837	9.67977	9.75887	9.87846	9.9749	9.83772	9.51653	9.92021	10.1514	10.811	9.66192	9.06787	8.70225	8.5975	9.00482	9.61516	9.04928	9.8376	9.90857	9.53872	8.98127	8.34307	9.26758	9.59004	8.51524	8.43631	11.426	11.1076	11.3476	10.0503	9.83559	8.56714	11.1607	11.2339	11.4171	10.9437	10.186	10.3737	9.16726	9.70458	9.09537	9.91891	9.80943	9.32765	10.2819	10.4816
AT1G26880	AT1G26880	AT1G26880	9.43264	9.84739	10.9815	9.00836	9.11836	8.69844	9.59263	9.63484	9.21107	10.7072	9.83612	10.473	9.55779	9.62443	9.40115	10.4398	9.56171	10.4695	10.8344	10.7606	10.8456	9.28314	9.94902	9.01654	9.99868	10.3191	10.6736	9.55259	9.00303	9.40861	8.86574	9.22061	8.99589	8.95697	9.40134	9.37316	9.76493	10.9436	10.6708	9.93343	9.53043	9.75076	9.70499	10.0947	10.8726	10.875	11.0463
AT5G55620	AT5G55620	AT5G55620	11.9445	11.4752	10.8378	6.6297	6.47628	8.08869	8.99086	8.49054	10.0823	8.54569	9.29462	8.63085	8.44537	8.94222	10.0848	8.95651	8.94522	8.95616	9.27106	9.87704	9.58057	8.30919	9.57436	8.37768	9.3694	8.03196	9.25084	10.2616	9.51883	8.07169	4.58404	4.51275	5.0695	9.32358	10.0038	8.49863	11.4372	10.6921	10.7045	10.6358	9.57131	9.78905	10.6065	10.349	10.0676	10.9826	11.5074
NdhM	AT4G37925	AT4G37925	11.2556	10.998	10.2074	7.0946	7.90813	8.0231	8.65202	7.70645	9.64977	9.48768	9.9237	9.44255	8.59517	9.00128	8.24253	7.84426	8.25505	7.60924	8.721	8.94003	8.94471	8.34225	7.81056	8.68222	8.28452	6.95383	7.34551	11.097	10.7824	10.6953	7.29223	7.86977	5.53978	10.8659	10.9573	10.6157	11.3591	10.469	10.6779	10.1284	9.61106	9.39972	9.77827	9.67346	9.1263	10.8812	11.0114
AT2G40510	AT2G40510	AT2G40510	9.60776	9.76359	10.7387	9.94881	10.1945	9.81936	10.7546	10.6581	9.93089	10.7686	10.3022	10.6344	10.4136	10.4146	10.139	10.8419	10.4316	11.0772	10.7452	10.8052	10.79	10.1102	10.4745	10.2268	10.746	10.6726	11.0963	10.0645	9.70604	10.0531	9.92668	10.3814	9.85277	9.69459	9.86402	9.98002	9.4669	10.3299	10.1677	10.1079	9.93459	9.98749	10.2821	10.0781	11.1172	10.4343	10.3935
AT2G25210	AT2G25210	AT2G25210	9.85934	9.87605	11.4292	9.22268	9.51474	8.45486	9.79453	10.0259	9.68175	10.7846	9.75884	10.7035	9.97657	9.93634	10.0214	10.8666	9.84664	10.7515	10.8925	10.7146	10.8753	9.38183	10.3083	9.19461	10.1338	10.5402	11.1584	9.49856	9.03891	9.41052	9.07496	9.84495	9.18647	9.11377	9.23593	9.5804	8.86782	10.3804	9.91288	9.77689	9.07244	9.36826	9.32537	9.70507	10.4206	10.3977	10.6236
GASA6	AT1G74670	AT1G74670	11.5347	11.633	10.336	4.04879	4.51705	7.25967	8.49463	4.66337	9.66585	10.5964	11.4263	9.48419	6.71797	8.36111	8.5975	5.18439	7.00302	3.59812	5.94908	6.03586	8.61998	4.10713	4.65299	6.22753	5.17581	4.57138	4.60991	5.1232	8.54509	4.57082	3.27946	2.58061	3.25491	7.1153	7.0966	6.04734	8.67113	11.2566	11.059	9.29645	6.63864	9.07071	6.69347	7.37591	5.23614	10.2853	11.4885
FAD3	AT2G29980	AT2G29980	10.1299	10.5507	11.0725	5.18079	5.87774	7.25967	8.57685	9.35352	10.1387	9.43307	8.47463	9.978	8.32628	9.11263	9.96972	10.2065	9.51828	10.0475	10.1106	9.72291	10.3536	9.18086	10.5769	8.87692	9.20231	8.10631	11.2135	6.43988	8.49431	5.55844	6.09247	5.23622	5.48128	8.19888	7.45061	7.99469	9.20487	10.1102	9.87762	9.99564	7.74828	10.0071	8.82524	10.206	10.1555	9.75783	9.68042
AT1G67360	AT1G67360	AT1G67360	10.2638	9.60357	8.69392	11.6434	11.8008	12.0071	10.4102	10.6299	10.7418	7.46039	8.81723	7.25564	10.3539	9.47962	8.86665	8.77948	9.76116	8.69427	8.57535	8.94633	8.27137	10.2819	9.32416	10.6327	10.139	10.2411	8.70057	10.6802	9.52896	11.5093	11.2864	11.683	10.6062	10.0682	10.0008	11.7139	9.15486	7.57697	8.43437	9.55796	10.5011	9.77386	10.4587	9.92853	9.19917	7.24376	7.42719
BCA4	AT1G70410	AT1G70410	11.6022	11.6257	11.2	7.41566	7.862	8.26929	8.93175	8.04632	10.2538	11.3552	11.3059	11.0524	9.54768	10.2571	9.87215	10.0501	10.1311	9.76443	10.2549	10.2999	10.3044	8.7045	9.6878	8.8226	9.16038	8.77173	9.5559	10.8972	10.9234	10.3136	7.97946	7.80732	7.41264	10.5922	10.8475	10.0202	11.0155	10.9658	11.0981	10.1909	9.35759	9.60625	9.35976	10.0984	9.44888	10.8047	11.0626
VHA-C3	AT4G38920	AT4G38920	11.1495	10.9508	10.9492	11.1543	11.3694	10.7125	10.7331	10.1789	10.7403	10.8072	10.9411	10.6441	11.1241	10.7978	10.7973	10.6571	10.7373	10.5933	10.5803	10.6074	10.7074	10.4122	10.8229	10.3519	10.9695	10.2676	10.72	11.1741	10.7567	11.4084	11.2548	11.8091	11.5359	10.7323	11.0364	11.362	11.1951	11.0884	11.4407	11.2729	11.0479	10.9799	10.9972	10.9027	11.0906	10.8499	10.962
SIRANBP	AT1G07140	AT1G07140	9.48345	9.76933	10.1503	10.1489	10.0269	10.3914	10.5218	10.5555	10.5747	10.3534	10.0745	10.0449	10.5233	10.5274	10.6133	10.9901	10.8861	11.1194	10.3367	10.4836	10.3977	10.5331	10.8202	10.3567	11.0613	11.0372	10.9297	9.54791	9.51544	9.38166	9.71511	9.94116	10.6028	9.55858	9.46577	9.34176	9.44626	9.91747	10.0698	10.144	10.1724	10.2438	10.4782	10.5645	10.9117	9.83094	9.71988
RPL9	AT3G44890	AT3G44890	9.88476	10.4518	11.6536	8.09242	8.29417	7.58166	8.84973	8.5188	9.16657	11.1512	10.2629	11.1177	8.67161	9.4629	9.2922	9.74843	9.16082	9.48446	10.8177	10.2591	10.6572	9.11735	9.89604	9.02056	8.80357	8.03921	10.1296	9.22673	9.87039	9.25586	7.89546	8.44649	6.86754	9.83579	9.43766	9.03736	9.79664	10.9161	10.7177	10.1891	9.15352	9.70456	9.64915	9.87716	9.89892	11.2873	11.1789
AT3G23600	AT3G23600	AT3G23600	10.256	10.0081	9.79361	11.2855	11.6546	10.8916	11.1612	10.9431	10.5866	9.99226	10.319	9.77709	11.0527	10.3853	10.0144	10.7062	10.7373	10.6325	9.74097	9.83352	9.66081	10.6043	9.80379	10.6932	11.1609	10.7921	10.6404	10.9467	10.5617	11.2509	11.9962	11.6154	10.7149	10.5872	10.9263	11.3247	10.4731	10.1111	10.7156	10.4131	10.7811	10.5171	10.7505	10.4651	10.7287	9.67431	9.74347
AT5G07020	AT5G07020	AT5G07020	10.2773	10.3199	10.4092	7.99439	8.45818	7.86983	8.45619	7.99897	9.11129	10.7846	10.7757	10.4067	8.6339	9.13741	8.77411	9.03345	9.04318	8.69663	10.5909	10.3812	10.2955	8.30919	9.0907	8.68222	9.53796	8.31779	9.11304	10.354	10.3361	9.97537	8.19156	8.68052	7.78331	10.4852	10.3801	10.4593	10.9369	10.9673	11.0443	10.2155	9.64154	9.72163	9.90899	10.2094	9.75604	11.2313	11.6521
AT4G15610	AT4G15610	AT4G15610	5.07588	3.95901	3.0145	11.6498	11.4651	12.7728	9.85146	10.5126	7.92734	4.11545	5.46787	3.6846	9.94612	8.85096	9.21471	4.33495	4.92995	4.23788	5.76226	5.17944	4.2371	11.0286	7.03291	12.392	6.43927	10.2753	5.95686	4.60276	4.46526	4.99331	9.74901	7.7487	10.7323	3.33426	3.95335	4.12388	3.64452	2.62812	3.14013	8.09439	9.70982	10.2579	4.33733	3.25786	5.0652	2.79727	3.36736
GAMMA-VPE	AT4G32940	AT4G32940	9.62597	9.21784	7.94128	11.5865	11.5348	12.6707	11.4512	11.9797	10.3384	7.21178	8.80702	7.78225	10.2688	9.29994	8.80698	8.50356	9.44217	8.56894	7.65896	8.06027	7.42735	10.9779	8.11869	11.3727	9.79188	9.77383	8.1896	10.3638	10.0035	11.1369	10.8861	10.5747	11.1779	10.4698	10.3034	10.907	10.0794	8.02663	8.61061	9.25635	10.4721	9.98183	10.2813	9.10909	8.44844	8.43913	8.64707
AT5G43150	AT5G43150	AT5G43150	10.3245	9.20095	8.13174	8.336	9.25849	9.57805	9.39109	9.03145	8.90464	7.9163	8.94056	7.78225	7.38445	6.7931	6.2694	7.38616	7.78098	7.71047	8.42282	9.07838	8.21173	7.28028	7.87357	7.87142	8.60943	8.02102	7.8334	11.3753	10.4961	11.2311	9.3646	9.78463	9.15407	10.5722	10.9097	11.7229	10.069	8.46413	8.77823	7.93418	8.72707	7.27592	9.28333	9.03258	8.53698	8.27701	9.02506
PHT3;1	AT5G14040	AT5G14040	10.0557	10.3711	10.766	9.82024	10.0006	9.87309	9.56788	9.64	10.2302	10.7403	10.4935	10.7096	10.2471	10.0339	10.2905	10.5077	10.6649	10.2919	10.9863	10.8817	10.9127	9.93278	10.6901	9.8863	10.7602	10.528	10.8035	10.1266	10.0938	9.56053	10.2445	10.5212	10.6079	10.0905	10.1238	9.61634	10.6071	11.0334	11.0789	10.7982	10.5847	10.6305	10.6581	10.9882	10.7207	11.1031	11.1187
RPL23AB	AT3G55280	AT3G55280	9.29907	9.67258	10.777	9.28205	9.35739	8.55882	9.9831	9.99004	9.18453	10.402	9.66782	10.1249	9.87718	9.97221	9.72299	10.7069	9.88445	10.7293	10.7445	10.7462	10.7181	9.66135	10.3396	9.52736	10.2004	10.6348	10.9747	9.5018	9.14369	9.52226	9.31696	9.90433	9.3384	9.12167	9.20992	9.41989	9.3123	10.5263	10.1237	10.1312	9.61106	9.77713	9.94288	9.89414	10.9503	10.5224	10.5169
CAX3	AT3G51860	AT3G51860	6.06089	6.4458	2.59465	12.1525	12.1873	11.8739	10.1954	10.08	9.41505	3.64208	4.0629	3.21953	11.1676	9.4657	8.00824	7.20385	7.74032	8.17928	3.52406	3.65499	3.24397	9.81526	8.02311	10.2544	9.06185	10.3732	6.63353	6.00184	4.15236	8.78348	11.4595	11.3565	11.0986	4.93667	4.19878	5.06127	4.7654	5.22728	6.81199	10.0138	10.8246	10.0725	8.99947	7.81082	9.99582	3.19608	3.36736
HR4	AT3G50480	AT3G50480	9.22137	8.38535	8.28588	10.269	10.332	11.5657	9.84117	9.76321	10.8485	9.07613	8.53768	8.96337	10.5603	9.0356	9.79234	8.02215	10.5916	8.20924	7.69075	7.20943	7.58843	9.98604	7.29063	10.2458	9.78664	11.563	7.48274	5.72014	6.06352	6.13925	9.16381	9.15191	7.22927	5.39357	5.41893	5.19955	8.65738	8.18285	9.38502	9.74827	11.1435	10.5365	9.734	10.5986	8.85005	5.77897	6.20005
AT5G58330	AT5G58330	AT5G58330	10.1572	10.0976	10.2431	9.5261	9.81631	8.70543	9.98933	9.03536	9.51783	10.3182	10.5608	10.1974	9.59997	10.0821	9.43309	9.98146	9.81925	10.0411	10.005	9.70692	9.71551	9.56382	9.56591	9.75711	9.71118	9.08884	10.0057	10.7362	10.6455	10.92	10.4659	10.1594	9.58405	10.7535	10.8885	10.555	10.96	10.9242	11.0965	10.6417	10.359	10.4734	10.6038	10.3848	10.6248	10.9768	11.0846
BIP2	AT5G42020	AT5G42020	8.6452	8.59812	9.44655	8.83229	8.31144	10.709	8.42591	8.20776	10.9226	9.1457	8.25208	9.56739	10.7003	10.2078	9.96062	8.87524	11.1858	8.35929	9.24988	9.18344	10.2124	11.1028	10.072	10.399	11.1312	10.6632	9.51828	7.96115	8.49775	7.70008	9.38014	9.61268	8.95348	8.42965	8.24205	7.63519	8.3878	9.7176	10.1586	9.77335	10.8088	10.4124	9.66233	11.6688	8.94402	9.72424	9.01452
J3	AT3G44110	AT3G44110	11.3463	11.2939	11.5815	10.2816	10.2493	10.5395	10.5827	10.4167	11.0383	10.0025	10.3475	9.83561	9.96713	10.0091	10.1064	10.3548	10.278	10.4431	10.4276	10.4756	10.391	10.2699	10.392	10.021	10.2507	10.4343	10.574	10.7307	10.2273	10.5077	10.5603	10.4848	10.4586	10.3027	10.5072	10.6204	11.0829	11.0384	11.1822	10.5982	10.7356	10.5778	10.6362	11.3219	10.9855	10.3794	10.5682
GSTU9	AT5G62480	AT5G62480	4.10538	3.10781	2.59465	6.75473	7.60625	7.64117	8.45619	10.2962	5.76568	2.93287	2	2.73496	5.64479	3.90343	5.47096	6.93568	3.92643	8.196	2	2.23769	2	5.29604	2.35435	5.56768	5.14337	11.8584	7.13056	2.68611	2.89638	4.67597	6.83183	6.01008	8.73303	2.46505	3.17429	6.28337	3.34851	2.62812	3.38147	3.73726	5.00381	5.18773	5.00032	3.5426	9.97031	2.45302	2
PYL4	AT2G38310	AT2G38310	9.16852	9.45001	9.52456	8.19307	7.95282	7.89449	7.97314	7.30059	8.17208	11.8274	10.7904	12.042	9.87516	10.3001	9.67706	10.0157	10.3774	7.94615	8.90389	9.00786	8.52518	8.99796	9.27574	8.98391	8.79054	8.33556	8.80558	6.62927	6.80314	5.8331	6.26306	4.79614	5.9809	6.53925	7.28111	4.9481	8.02635	7.92235	7.5776	8.0125	8.04631	8.12654	7.73685	7.68478	7.30116	10.0705	9.69809
AT2G35260	AT2G35260	AT2G35260	10.0194	9.9621	9.95504	6.99673	7.57799	7.7932	9.05755	8.26892	9.30439	9.5659	9.8983	9.29371	8.39553	9.17553	9.43572	9.39515	9.53621	9.4332	9.92483	10.1128	9.85848	8.73469	9.33913	8.2394	9.5581	8.53845	9.27299	10.1129	10.3148	9.69796	7.63036	8.22549	7.95436	10.3361	10.1856	9.79332	10.9723	10.9954	10.7273	10.5093	9.997	10.3145	10.4602	10.7762	10.117	10.9847	10.9963
AT3G12345	AT3G12345	AT3G12345	11.0062	10.9734	11.1229	8.96244	9.19943	8.60439	9.32372	8.68261	9.92823	11.0217	11.1995	10.7796	9.18007	9.48515	9.38219	9.12182	9.42303	8.95026	10.4831	10.3687	10.3518	8.83565	9.04884	9.12898	9.28642	7.96122	9.02734	10.5067	10.6494	9.86434	8.37643	8.78144	7.45885	10.5598	10.6261	10.2643	10.9855	11.1222	11.1403	10.2786	9.7675	9.69075	9.67018	10.1646	9.20304	11.0327	11.3395
ADF3	AT5G59880	AT5G59880	11.521	11.2819	10.9462	11.5211	11.4728	11.4878	11.1505	10.7996	11.2092	11.4526	11.511	11.0299	11.426	10.9938	10.9393	10.9299	11.278	10.7955	11.2601	11.2047	11.0799	11.0081	10.9115	11.0402	11.4525	10.7835	10.7745	11.4235	10.9513	11.3752	10.7528	10.8818	10.1085	10.9343	11.2399	11.2275	11.3768	11.1677	11.3451	11.1179	11.2317	10.9628	11.2678	11.0712	10.813	10.8365	11.3598
TL29	AT4G09010	AT4G09010	9.87718	10.3172	10.8321	5.3168	6.27977	6.29684	7.92632	7.5065	9.12065	10.858	10.4775	10.7709	7.61486	8.68313	7.88282	8.6241	8.61502	8.27367	10.6701	10.0381	10.4845	7.63	8.91546	7.54225	8.77739	7.26333	9.18099	9.11498	9.96419	9.35222	5.08649	7.04259	5.4203	10.0631	9.59465	9.58829	10.1508	10.9814	10.7927	9.28819	8.47345	8.91516	9.02419	9.8973	8.77055	11.3514	11.2901
C4H	AT2G30490	AT2G30490	10.8012	11.0819	11.4831	10.3486	10.4478	9.83218	9.23743	9.84806	10.6184	9.8649	9.63743	9.96271	9.46687	8.82067	9.0217	9.36167	9.70417	9.17099	10.0352	9.57492	9.56874	9.36263	9.39984	9.69547	9.26019	9.14703	9.42467	10.8774	10.4683	10.5907	10.5603	11.0107	8.81822	10.4683	10.5617	11.7576	10.6383	10.8832	11.097	9.76384	10.601	9.79121	10.0001	10.6134	9.65133	11.0286	11.0255
AT1G19000	AT1G19000	AT1G19000	11.0051	10.8057	9.90833	9.91973	9.96283	9.75009	10.23	10.016	10.0799	9.51184	10.1915	9.37102	9.62662	9.64185	9.33227	9.25456	9.1323	9.27537	9.92037	10.0381	9.9718	9.53265	8.90209	9.55816	9.43284	8.52043	8.71502	11.1371	11.1415	10.6937	9.67536	9.37285	9.43404	10.6697	11.0854	10.6688	11.5719	10.9436	10.8471	10.5001	10.354	10.3257	10.0248	10.1102	9.61208	10.629	10.9784
AT1G44000	AT1G44000	AT1G44000	11.0884	11.2356	11.136	8.95203	8.96315	8.64129	9.67346	9.00373	10.2623	10.5103	10.3022	10.6199	8.89132	9.38815	9.23297	9.61406	9.45059	9.37124	10.4401	10.308	10.3741	8.68402	9.14279	8.85904	9.51279	8.29374	9.46904	9.87048	10.1724	8.97338	7.99569	8.24447	5.65012	9.80299	9.93348	8.77513	11.0063	11.2647	11.1946	10.3132	9.4324	9.77058	9.69348	10.3108	9.92727	11.105	11.2472
SOBIR1	AT2G31880	AT2G31880	10.9179	10.3406	8.50022	10.5116	10.2493	11.248	10.6712	10.4885	11.0493	9.77195	9.59853	9.97037	11.1519	10.0711	10.3765	9.67634	11.407	9.99115	8.13004	7.71155	8.60847	10.8121	7.94702	10.7778	9.97583	11.3885	8.39652	7.51911	9.25771	7.56286	9.55732	9.49675	7.34862	7.85935	7.49723	6.84342	9.76108	9.48844	8.88251	9.47011	10.9215	10.4166	10.8298	10.7882	9.52095	7.78736	7.94653
TCH2	AT5G37770	AT5G37770	11.8802	11.5521	10.158	7.75196	8.14806	8.28802	8.42285	8.69257	9.25424	11.0065	11.5349	10.878	9.87111	10.0149	9.27175	9.99088	9.5656	9.67303	10.5438	10.6747	10.4727	8.6315	8.46174	9.15486	7.45933	8.12005	8.15292	10.7036	11.1934	8.22251	7.96305	6.89424	6.69808	10.5584	10.5828	8.54153	10.3554	10.5012	9.97518	8.35073	8.12295	7.91722	8.49769	8.80466	8.47002	10.1344	10.5415
AT1G13650	AT1G13650	AT1G13650	9.34009	10.2074	9.66535	3.22939	3.74934	4.71065	6.04443	3.80311	8.37345	9.39981	8.64466	8.49223	6.62491	7.89697	7.68485	7.91631	6.48481	7.46218	10.53	10.3259	10.5211	6.77961	8.07169	6.65807	7.426	6.07211	8.12613	9.93173	10.4987	9.36407	5.14586	5.82072	5.14682	10.0393	9.92391	8.94943	10.1924	10.649	9.90445	8.91377	7.89351	7.9251	7.77133	9.25257	8.34012	11.0307	11.5055
AT4G34450	AT4G34450	AT4G34450	9.12651	9.36157	9.81009	10.2899	9.98721	10.1205	10.4752	10.4062	10.1863	9.57739	9.52368	9.64925	9.96143	10.4504	10.4116	10.6319	10.4486	10.7413	9.51252	9.42811	9.57171	10.5187	10.7228	10.4581	10.2421	9.90361	10.7133	9.21889	9.51714	9.49916	9.72974	9.92948	10.1037	9.46384	9.36724	9.60705	9.38083	9.80349	10.0698	10.7303	10.4234	10.7987	10.4481	10.704	10.6534	9.88935	9.53068
ABCB4	AT2G47000	AT2G47000	4.23756	3.84765	3.47787	5.44108	5.92337	7.95437	7.46659	9.14094	5.4464	3.89809	4.65469	4.03573	6.60555	5.20524	7.70243	8.39427	5.95559	9.98923	3.32239	4.19598	4.29572	7.29387	5.30874	7.54225	6.47881	11.7577	8.90977	3.78062	4.72225	3.48383	6.23599	6.27298	8.95348	4.47622	3.73729	4.59406	3.45407	3.3987	2.67988	4.96763	6.68195	6.23871	5.67722	4.6364	10.2974	3.59883	2.39616
AKN2	AT4G39940	AT4G39940	8.7868	9.11038	6.41982	7.38503	7.76507	7.88221	8.63094	8.15112	7.34356	10.6648	11.3417	10.3897	9.14698	7.56238	7.6308	9.89383	9.98502	9.67303	11.0672	11.2618	10.7361	9.70267	10.9574	8.48649	10.6117	10.3206	9.93727	9.65349	9.24957	8.39029	7.01812	9.00938	8.50243	9.66785	9.84612	8.25474	10.2631	7.22379	7.59567	8.37278	8.36137	8.26341	9.08419	7.87636	8.62233	8.52832	9.05279
AT1G49750	AT1G49750	AT1G49750	10.7932	10.9356	10.3731	8.13904	8.186	8.64856	8.72844	8.30182	10.0286	10.3942	9.69204	10.5611	9.10968	9.57084	9.50496	9.40144	9.90911	8.54825	9.9159	9.78163	10.3275	9.33333	8.84033	9.21584	9.94441	8.39327	8.56554	8.75448	9.60434	7.7248	7.96305	7.10623	3.91573	9.51424	9.2932	7.4257	11.5668	11.0488	11.2035	9.73981	9.88334	9.9032	9.96964	11.0463	9.20304	10.2473	10.7165
AT5G19250	AT5G19250	AT5G19250	10.1821	10.3212	10.4676	9.68537	9.4808	10.2263	9.21282	9.45352	10.5085	11.5131	11.3482	11.6181	11.022	9.8808	10.3833	9.90051	11.1285	9.38297	10.7899	10.2933	11.0392	10.2904	9.6741	10.2492	10.7568	9.91054	9.93881	8.52889	9.84764	7.42635	8.05109	8.06925	7.03958	9.33891	8.96861	8.50532	10.7435	10.4895	10.58	9.96694	10.6886	10.1092	10.0789	11.0717	8.96697	10.169	10.3716
AT2G40590	AT2G40590	AT2G40590	9.40479	9.41382	10.6545	8.92035	9.47315	8.8193	9.92799	10.0552	9.05381	10.4788	9.59458	10.0995	9.73746	9.96827	9.68592	10.6728	9.82412	10.7977	10.403	10.6297	10.4663	9.40079	10.1089	9.38781	10.1594	10.7207	10.7788	9.43229	8.93611	9.44812	9.15661	9.53001	8.92084	9.00475	9.29815	9.32675	9.23109	10.3883	9.97173	10.0975	9.44345	9.60993	9.86406	9.70507	11.0847	10.389	10.3975
AT5G22440	AT5G22440	AT5G22440	8.94504	9.46894	10.8474	8.68923	9.09362	8.08869	9.94304	9.88325	8.93679	10.3141	9.19121	10.0204	9.59261	9.70481	9.93297	10.6419	9.54016	10.8494	10.4602	10.5513	10.4259	9.3168	10.1547	9.14751	9.82037	10.2505	10.9724	9.10225	8.83633	9.05118	8.69239	9.47482	8.82411	8.86581	9.00738	9.20478	8.71957	10.1688	9.72315	9.68422	8.64465	9.44154	9.24704	9.3027	10.9598	9.9444	9.84412
PPC2	AT2G42600	AT2G42600	10.3702	10.22	9.86479	9.28205	8.90746	10.0454	9.22518	9.05479	10.2237	10.6031	11.0094	10.1832	9.80689	10.0507	9.45658	9.5073	10.18	9.53396	10.5416	10.604	10.483	9.65083	10.1419	9.44286	9.92665	8.82513	9.40586	11.2438	10.5476	10.8834	9.55185	9.65053	9.20014	10.6418	10.9005	10.8738	11.348	10.9129	11.0266	10.3549	10.5515	10.4928	10.5438	10.9607	9.79332	10.8423	11.3639
RTFL12	AT4G13395	AT4G13395	11.2903	10.5113	7.48765	7.2556	7.39574	8.73304	6.65842	8.12195	5.90222	10.4365	11.3581	11.2505	9.31726	8.88899	8.30713	6.51612	6.97992	6.79156	10.7602	11.3098	10.4201	7.82969	7.64384	7.75055	6.45257	9.63002	6.13937	9.39624	10.743	5.8331	5.02457	5.23622	8.61555	9.25338	8.83886	4.19174	7.9152	8.02663	6.3969	6.03917	7.02238	6.78936	6.23825	5.17003	5.08771	8.7323	8.63336
CAM4	AT1G66410	AT1G66410	9.4083	9.22899	9.39283	11.4818	11.5942	11.7552	10.8415	11.1827	11.037	10.2248	10.2912	10.1532	11.4322	10.7945	10.6668	10.5739	11.2679	10.3158	10.4307	10.6453	10.2955	11.2477	10.8955	11.3727	11.7406	11.1121	10.6251	10.673	10.5123	10.8493	11.4036	11.7501	11.8033	10.4114	10.6267	11.0452	9.5907	9.07316	9.49503	10.347	10.7604	10.4394	11.0668	10.4071	9.74988	9.24681	9.28391
HBP1	AT1G17100	AT1G17100	11.5491	11.3274	10.9713	9.5261	9.80417	9.3066	10.7601	9.53601	10.2193	8.85228	9.14876	9.24821	9.4908	9.87027	8.77826	10.4603	9.75267	10.6294	8.9129	8.7175	9.10695	9.61341	9.67016	9.92549	9.65044	9.15205	10.3271	10.3815	10.0972	10.9981	10.5314	10.3739	8.85324	10.3113	10.3573	10.1749	9.99879	9.9884	10.8115	10.3916	10.2544	10.1434	10.9464	9.99987	11.0341	10.2682	10.3297
JAZ8	AT1G30135	AT1G30135	6.29131	5.86526	3.47787	4.77124	5.67923	5.86921	4.03565	3.64802	2	11.7514	12.1483	11.3741	7.33829	4.25365	5.47096	8.04643	8.0374	7.89382	8.15304	9.24776	7.71195	5.44956	6.07631	6.92192	6.46575	7.39346	6.28209	4.94454	5.73061	3.36305	3.05006	2.99347	6.3836	5.31304	4.19878	3.176	4.16337	2.24104	3.00241	3.17426	4.07927	3.40896	2.45261	2.23134	2.61015	4.70787	4.1622
emb2726	AT4G29060	AT4G29060	10.706	11.337	11.427	7.44564	7.59219	7.64117	9.32864	8.63177	9.46368	11.2536	10.6802	11.0433	9.1028	9.94037	9.72514	10.5287	9.41659	10.0567	10.8988	10.6166	10.9092	9.48609	9.70907	9.32407	9.3729	8.40173	10.2992	9.7947	10.1702	10.1187	8.47232	8.74858	9.18647	10.0549	9.63169	9.31539	10.0659	10.9563	10.621	9.63164	9.13999	9.56144	9.56039	9.69299	9.84543	11.1337	10.972
HD2B	AT5G22650	AT5G22650	8.91573	9.25922	10.2419	7.79918	7.94178	8.04529	9.5041	9.76557	8.6375	9.90922	9.22991	9.45535	9.19633	9.05803	9.32377	10.4237	9.33475	10.6399	10.3763	10.6759	10.4766	8.95586	9.73946	8.85454	9.70703	10.5364	10.5379	9.67943	8.79216	9.67277	9.29746	9.3335	10.0618	9.11575	9.32262	9.57723	9.32279	10.2503	9.6758	9.28985	9.07448	9.29106	9.37105	9.72655	11.205	10.0526	10.1962
MLP423	AT1G24020	AT1G24020	5.39183	6.78498	10.625	2.9233	2	3.00604	3.49753	8.97138	6.85315	9.25849	6.95087	10.3859	5.04153	4.84142	5.83196	7.84426	7.53379	7.4455	9.60439	9.01187	10.4275	4.92916	9.14279	4.76351	7.71247	6.08618	11.132	7.56931	10.0023	7.34098	4.30029	5.54262	4.23186	9.35241	8.5711	8.66305	7.53091	8.58383	8.36932	5.83652	3.33233	5.99088	5.40345	7.1613	4.87125	10.5588	9.94377
HEMC	AT5G08280	AT5G08280	9.82297	10.3623	11.9462	8.55813	8.59842	8.59689	8.87685	8.60039	9.75571	10.8795	10.0487	11.0152	9.275	9.59149	9.45658	9.44928	9.55782	9.19448	10.7665	9.88581	10.629	9.05889	9.57225	8.97978	9.2238	8.51524	9.77	8.7271	9.34438	8.9964	8.51798	8.43827	8.54589	9.39215	9.02539	8.49863	9.3332	11.0203	10.8192	9.67411	8.99729	9.31526	9.12476	9.78802	9.20175	10.9794	10.8449
PRPL28	AT2G33450	AT2G33450	10.2423	10.5804	11.5829	7.96363	8.55559	7.64117	8.72596	8.46753	9.55628	11.1958	10.5769	11.2421	8.82173	9.54195	9.13282	9.50145	9.15567	9.28946	10.9879	10.5058	10.8663	8.82165	9.65828	8.66174	9.10881	8.02832	10.0858	9.54006	9.83681	9.34227	7.88679	8.23501	7.48886	9.9333	9.69181	9.46	9.8252	10.6947	10.5898	10.0128	8.80748	9.49282	9.01188	9.58213	9.41368	11.0215	11.0635
CYP79F1	AT1G16410	AT1G16410	8.38505	9.74429	2.8198	7.70315	7.82641	4.91734	7.94352	5.19857	5.61485	9.06638	11.2791	7.66121	9.61456	8.23553	5.69819	10.1061	9.19381	9.46528	9.24096	10.3145	9.84628	8.16143	8.18644	7.91533	10.2536	9.25214	9.65197	10.6234	10.0071	8.67031	7.90409	8.9383	4.36725	10.8004	11.1429	9.61015	11.0257	5.92449	6.43755	8.42194	8.53379	8.53211	9.83292	5.96438	9.42256	8.46647	9.43117
APK	AT2G14750	AT2G14750	9.02497	9.22621	7.77653	8.228	8.56281	8.24071	9.06543	8.61092	7.91663	10.5329	11.6018	10.2809	9.1028	8.15458	8.04315	9.77532	9.77967	9.59701	11.2794	11.2078	10.814	9.65083	10.7295	8.74684	10.4143	10.1402	9.62353	10.354	9.72672	9.60781	8.69736	10.1137	7.67002	10.1429	10.2015	9.41989	10.7363	8.33359	8.7135	9.09331	9.15544	8.71601	9.57162	8.63579	9.37303	9.01751	9.4072
ATHM2	AT4G03520	AT4G03520	10.8224	10.7784	10.8297	9.49776	9.6667	9.54337	9.68502	8.99972	9.86	10.7836	11.2047	10.6819	9.89522	10.1411	9.50746	9.47486	9.68108	9.31265	10.7414	10.751	10.606	9.76738	9.88928	9.86854	10.2479	9.0748	9.5265	10.7908	10.6189	10.7684	9.58708	9.48683	8.69492	10.5736	10.7298	10.6349	11.1908	10.9242	11.3081	10.347	10.1319	10.0742	10.3407	10.2362	9.82297	11.1702	11.3332
AT1G70420	AT1G70420	AT1G70420	6.16418	5.77683	4.97937	6.57649	7.32949	6.18131	6.15194	6.67477	6.10448	6.72541	5.80508	6.27653	7.32652	7.66336	6.78039	4.53129	5.80602	5.49906	6.81772	7.63562	6.90371	7.26657	6.83604	7.25837	6.84433	11.9055	6.01641	8.26136	7.34425	8.71727	7.651	7.23518	7.03958	7.51989	7.87367	9.03505	6.80066	5.30897	5.85247	6.45983	6.0661	6.21318	5.97642	5.51546	6.1252	4.89837	4.9328
AT4G28080	AT4G28080	AT4G28080	10.6567	11.2691	10.824	7.22135	7.39574	7.58166	9.7886	8.84764	9.78544	10.4213	10.1053	10.5155	9.0429	10.3219	10.5097	10.7955	8.9482	10.7977	9.6251	9.19935	9.879	10.3981	10.5821	9.91903	8.32485	8.29071	9.75172	9.61815	10.2397	10.0309	8.28034	8.2014	7.70878	9.94225	9.72647	8.84266	10.4541	11.0918	10.7776	10.853	9.71374	10.9973	9.53051	9.97315	10.1956	11.0024	10.8047
AT4G19410	AT4G19410	AT4G19410	9.74181	9.62694	10.1268	8.11125	8.08921	7.36931	10.1199	9.41194	9.51428	8.22762	7.55719	8.67216	8.82592	9.05431	9.4797	10.4214	9.26002	10.3004	8.44784	8.00903	8.36331	8.49705	9.23099	8.22551	9.3285	9.05348	10.5952	7.08247	7.44039	6.97944	7.44187	7.91786	7.80733	7.5318	7.33985	7.52111	8.5454	9.2369	9.45599	10.0148	8.92704	9.68844	9.57859	10.1514	10.9773	9.14143	8.58669
FLA9	AT1G03870	AT1G03870	11.4597	12.1838	11.5485	7.51799	8.08921	7.71226	9.7646	7.62561	10.0261	10.4059	9.31155	9.49663	9.51694	10.8242	9.84867	9.89271	9.63562	8.27682	8.98518	9.22893	8.76448	8.01331	8.25114	8.09411	9.04439	7.25712	7.43116	7.39933	8.05453	7.30044	4.66745	4.9428	4.36725	7.81129	7.92573	6.82217	8.90553	10.6997	10.6637	9.01336	8.85319	8.80627	8.92048	8.91274	9.41813	10.6773	10.7208
COB	AT5G60920	AT5G60920	9.62898	10.0869	10.0442	8.35982	7.99618	8.15144	9.16778	9.06632	9.803	10.8295	10.7179	10.4549	9.30531	9.86604	9.79848	10.2463	10.4818	9.76779	10.7868	10.9522	10.6663	9.20263	10.4086	8.69739	10.6811	9.43636	10.1942	10.9749	10.7401	9.73798	7.58817	8.14191	5.2202	10.3846	10.7243	10.4576	10.6312	10.6411	10.8173	9.88385	9.26451	9.68844	10.3192	10.5632	9.60722	10.6504	10.7078
AT2G20450	AT2G20450	AT2G20450	9.30662	9.66439	10.9022	7.96363	8.50396	7.45472	9.42823	9.2393	8.42726	10.268	9.73213	10.0204	9.30231	9.52326	9.2893	10.398	9.07077	10.7281	10.777	10.9657	10.6579	9.12116	10.0434	8.74684	9.77609	10.636	10.8328	9.20506	8.51484	9.22803	8.67234	9.23729	8.2455	8.58919	8.86576	9.00235	8.16106	9.66039	9.27156	8.94774	8.19198	8.47956	8.41287	8.83135	10.4898	9.55627	9.81405
[truncated: 31,839 more rows]
[truncated: 7 more columns]
