# Supplementary material for: Nuclear coat protein drives a multifaceted tolerance program during Turnip crinkle virus infection
Source: Research Square preprint supplement (doi:10.21203/rs.3.rs-8695072/v1), 2026-02-12
Supplement: Supplementary file 9 [file f7e8ff5416ed5214d238d90d.xlsx]

## Sheet: EBSeq_results
gene	Pattern	padj	Log2(TCV/Mock)	Log2(TCV/NES)	TCV_1	TCV_2	TCV_3	Mock_1	Mock_2	Mock_3	NES_1	NES_2	NES_3
AT1G01010	TCV = NES > Mock	1.26565e-14	3.76101	0.325013	811.222	1213.51	936.625	93.0289	59.1123	66.2614	476.878	786.535	1100.6
AT1G01020	TCV < Mock = NES	1.49836e-12	-0.86115	-1.06257	371.237	263.417	305.566	520.735	653.782	533.404	694.279	718.404	551.133
AT1G01030	TCV = Mock = NES	0.590706	-0.353752	-0.387173	158.119	75.007	99.6409	146.35	134.776	144.119	147.271	168.057	119.884
AT1G01040	TCV > Mock > NES	1.11022e-16	1.24015	0.886033	5382.94	4665.61	5341.7	2067.06	1956.62	2491.43	2846.37	2721.46	2759.83
AT1G01050	TCV = Mock < NES	0.391813	-0.0928981	-0.463773	2744.01	3558.37	2859.22	3033.65	3463.98	3273.31	3636.2	3920.56	5078.42
AT1G01060	TCV = NES < Mock	0	-0.901812	-0.0718807	23983.1	24382.6	21509.2	42699.1	45693.8	42162.1	25433.2	23599.1	24412.2
AT1G01070	TCV > Mock = NES	0	2.50019	3.05486	131.603	125.905	146.14	24.959	24.8272	21.535	9.64276	10.5982	28.3059
AT1G01080	TCV < Mock < NES	0	-2.84588	-1.42103	467.484	425.04	495.358	3337.7	3411.96	3228.59	1121.19	1299.03	1296.25
AT1G01090	TCV = NES < Mock	0	-1.09287	0.239336	2538.75	2172.52	2187.36	4442.7	5612.12	4659.83	1954.85	1822.88	2066.33
AT1G01100	TCV = Mock = NES	0.964086	0.0995408	-0.0519097	2410.09	2101.09	2666.35	2042.1	2914.23	1742.67	2587.77	2729.78	2122.95
AT1G01110	TCV < Mock < NES	0	-2.415	-0.770004	20.6243	3.57176	34.1626	93.0289	104.038	114.301	27.1751	42.3926	29.971
AT1G01120	TCV < Mock < NES	0	-4.24623	-1.86356	403.647	108.046	1515.49	10979.7	14369	13123.1	2490.46	2790.34	2096.3
AT1G01130	TCV = Mock > NES	0.000504049	0.549477	2.46336	54.016	154.479	77.8148	49.918	91.0329	54.6656	21.9154	16.6542	13.3204
AT1G01140	TCV > Mock = NES	4.41847e-12	1.81475	2.10704	9596.18	8125.76	6352.35	4014.99	1415.15	1413.02	1773.39	1367.16	2447.63
AT1G01150	TCV = Mock = NES	0.935358	1.8168	3.21795	0.982109	2.67882	4.74481	0	2.36449	0	0.876615	0	0
AT1G01160	TCV > Mock = NES	-2.22045e-16	1.13667	1.06623	1188.35	1123.32	1171.97	490.104	550.926	543.343	546.131	489.786	627.726
AT1G01170	TCV < Mock = NES	0	-0.902654	-1.01682	1151.03	879.546	980.277	1856.04	2083.12	1689.67	2159.1	2165.81	1767.46
AT1G01180	TCV > Mock = NES	0	3.17662	2.90725	923.182	768.822	690.844	78.2804	79.2104	106.018	129.739	94.6264	93.2431
AT1G01190	TCV = NES < Mock	4.34936e-05	-1.79555	0.0383333	2.94633	8.9294	8.54065	22.69	20.0982	28.1611	7.01292	4.54207	8.32528
AT1G01200	TCV < Mock < NES	-2.22045e-16	-6.98527	-4.61933	0	0	1.89792	86.2219	76.846	81.1702	7.01292	12.8692	27.4734
AT1G01210	TCV < NES < Mock	3.59924e-07	-0.516729	-1.20338	291.686	275.919	288.484	389.133	456.347	379.346	775.804	698.603	497.019
AT1G01220	TCV < Mock < NES	2.10942e-15	-0.922961	-0.393768	662.923	638.452	616.825	1215.05	1081.75	1340.14	745.123	833.469	941.589
AT1G01225	TCV = Mock = NES	0.740907	-0.272829	0.407288	59.9086	184.839	74.9679	122.526	131.229	132.523	79.7719	68.888	92.4106
AT1G01230	TCV > NES > Mock	0	0.572028	1.09109	991.93	931.337	902.462	654.606	585.211	660.957	394.477	422.412	509.507
AT1G01240	TCV > Mock > NES	0	3.51	2.11313	2313.85	1809.99	1703.39	209.882	160.785	140.805	480.385	401.973	464.55
AT1G01250	TCV < Mock < NES	1.80242e-05	-2.36095	-0.997049	12.7674	29.467	13.2855	82.8184	65.0235	137.492	36.8178	25.7384	48.2866
AT1G01260	TCV = NES < Mock	0.000712874	-0.499306	-0.0330276	820.061	741.14	776.25	1292.19	959.983	1051.9	817.005	856.937	717.639
AT1G01280	TCV = Mock = NES	0.98208	6.97732	2.13178	1.96422	1.78588	0	0	0	0	0	0	0.832528
AT1G01290	TCV = NES > Mock	0.000147871	0.238863	-0.110892	697.297	679.528	623.468	545.694	591.123	558.252	758.272	735.815	666.022
AT1G01300	TCV < Mock < NES	5.40917e-08	-1.59762	-0.906313	470.43	176.802	688.946	1274.04	1242.54	1527.33	709.181	765.338	1029.84
AT1G01310	TCV > Mock = NES	0.0673988	8.64599	2.31171	2.94633	7.14352	1.89792	0	0	0	0.876615	1.51402	0
AT1G01320	TCV = NES < Mock	1.1313e-09	-0.583241	0.214437	22370.5	22128	20372.3	30216.3	28908.3	38065.5	17890.8	18024.4	19995.6
AT1G01340	TCV > Mock > NES	0	2.53763	1.81569	1367.1	1763.56	1483.23	289.297	210.44	294.863	525.092	412.571	372.972
AT1G01350	TCV < Mock = NES	0.296687	-0.349842	-0.286295	559.801	595.348	560.696	704.416	809.759	672.542	809.825	719.041	563.621
AT1G01355	TCV > Mock = NES	1.04526e-11	6.31825	4.64961	59.9086	88.4011	35.1116	2.269	0	0	1.75323	3.02805	2.49758
AT1G01360	NES < TCV < Mock	8.88178e-16	-0.731683	0.337563	877.023	793.824	758.22	1527.04	1337.12	1169.51	570.676	588.198	763.428
AT1G01370	TCV = Mock > NES	0.0171333	0.232085	0.800715	62.8549	108.939	87.3044	63.532	87.4862	69.5745	52.5969	46.1777	49.9517
AT1G01380	TCV < Mock = NES	1.11022e-16	-2.88233	-2.95615	7.85687	18.7517	32.2647	178.116	141.869	114.301	127.986	130.963	198.142
AT1G01390	TCV = NES < Mock	2.90951e-05	-1.84236	-0.49596	53.0339	152.693	17.0813	323.332	205.711	270.015	112.207	94.6264	107.396
AT1G01400	TCV = Mock = NES	0.969111	7.31744	2.39998	1.96422	0.89294	1.89792	0	0	0	0.876615	0	0
AT1G01420	TCV > Mock = NES	0	1.0209	1.05825	994.876	996.521	879.687	467.414	367.678	579.787	504.93	404.244	469.546
AT1G01430	TCV < Mock < NES	4.8106e-12	-1.50984	-0.817124	503.822	532.192	701.282	1340.98	1956.62	1649.91	1011.61	1163.53	885.809
AT1G01440	TCV > NES > Mock	0	0.554284	0.946445	1335.67	1192.97	1335.19	806.629	782.646	1041.96	667.104	617.721	720.136
AT1G01450	TCV = Mock = NES	0.665399	3.36844	-0.383181	7.85687	1.78588	2.84688	0	1.18225	0	3.50646	5.29908	7.49275
AT1G01453	TCV > Mock = NES	0	12.8837	6.53076	96.2466	53.5764	76.8659	0	0	0	0	0.757011	1.66506
AT1G01470	TCV > Mock = NES	3.0017e-08	1.38854	1.41714	5763.01	3884.29	3672.48	2042.1	1443.52	1601.87	1781.28	1616.22	1590.13
AT1G01480	TCV = NES > Mock	0.0219993	5.73567	-1.14444	145.352	95.5446	65.4783	4.538	1.18225	0	508.437	93.1124	75.76
AT1G01490	TCV > NES > Mock	-2.22045e-16	1.05482	1.61032	3605.32	3883.4	2920.9	1624.6	2031.1	1355.05	1094.89	1075.71	1238.8
AT1G01500	TCV > Mock > NES	0	2.61321	0.698345	833.81	826.863	724.057	130.467	130.047	129.21	628.533	498.113	343.001
AT1G01510	TCV = Mock < NES	0	0.243167	-0.956818	1169.69	1534.07	1349.42	1072.1	1283.92	1068.46	2498.35	2903.9	2465.11
AT1G01520	TCV < Mock < NES	0	-1.96406	-0.990311	1211.92	1728.73	1099.85	5395.68	5061.19	5307.54	3098.83	2049.23	2878.88
AT1G01530	Mock < TCV < NES	0.183458	2.58831	-1.90457	1.96422	6.25058	1.89792	0	0	1.65653	3.50646	5.29908	29.1385
AT1G01540	TCV < Mock < NES	0	-1.24861	-0.405316	1493.79	1378.7	1610.39	3250.34	3765.45	3636.09	1875.08	1952.33	2109.62
AT1G01550	TCV > NES > Mock	0	0.836568	1.36766	14801.4	11652.9	11590.6	6803.59	7413.86	7086.66	5357.87	4647.29	4737.91
AT1G01560	TCV > Mock = NES	1.25838e-08	2.26486	2.30609	4976.34	3331.56	2707.39	940.5	372.407	979.012	1229.01	591.226	407.106
AT1G01570	TCV = Mock = NES	0.381843	0.264574	1.4563	17.678	121.44	49.346	60.1285	43.7431	53.0091	22.792	24.2244	21.6457
AT1G01580	TCV > Mock = NES	0	1.03376	0.904801	214.1	205.376	225.853	125.929	73.2992	115.957	101.687	118.094	124.879
AT1G01590	Mock < TCV < NES	0.000539101	0.91901	-3.91677	3.92843	6.25058	3.79585	4.538	1.18225	1.65653	106.947	87.0563	17.4831
AT1G01600	TCV = NES < Mock	2.32864e-06	-2.35284	0.142833	9.82109	4.4647	83.5086	231.438	132.411	135.836	18.4089	22.7103	47.4541
AT1G01610	TCV < Mock < NES	6.88338e-15	-2.52423	-1.15758	465.519	233.95	891.075	2183.91	3492.35	3473.75	1207.1	1200.62	1140.56
AT1G01620	TCV = NES < Mock	4.97761e-11	-1.92812	0.00289938	1306.2	1186.72	1686.3	3791.5	6812.1	5300.91	1547.23	1423.94	1199.67
AT1G01630	TCV = NES < Mock	0	-0.964157	0.085065	1175.58	1301.01	1195.69	2190.72	2492.17	2481.49	1090.51	1105.24	1266.27
AT1G01640	TCV > Mock > NES	1.11022e-16	4.01658	1.62913	654.084	950.089	640.549	54.456	46.1076	38.1003	232.303	211.963	281.394
AT1G01650	TCV > Mock = NES	0	1.23599	1.31903	3232.12	3568.19	3143.91	1614.39	1098.31	1509.1	1423.62	1223.33	1338.7
AT1G01660	TCV > Mock = NES	8.49478e-05	4.47644	4.91921	385.969	2061.8	1135.91	58.994	39.0141	62.9483	47.3372	30.2805	40.7938
AT1G01670	TCV > Mock = NES	0.000220946	2.8	1.77465	431.146	1166.18	832.239	119.122	92.2151	137.492	278.763	199.851	231.443
AT1G01680	TCV > Mock > NES	0	6.68705	1.20341	2806.87	2327.9	2236.7	37.4385	5.91123	28.1611	1212.36	1279.35	709.313
AT1G01690	TCV > Mock = NES	8.86291e-12	0.706949	0.817709	139.459	150.907	153.732	88.4909	95.7619	87.7963	70.1292	88.5703	93.2431
AT1G01695	TCV > Mock = NES	0.0587664	0.902124	1.59366	21.6064	69.6493	39.8564	19.2865	26.0094	24.848	7.01292	18.9253	17.4831
AT1G01700	TCV < Mock = NES	1.11022e-16	-2.25669	-1.83729	11.7853	16.9659	12.3365	69.2044	62.659	64.6049	40.3243	49.9627	56.6119
AT1G01710	TCV > Mock > NES	3.08631e-12	0.680313	0.430836	2216.62	2001.08	1801.13	1330.77	1147.96	1277.19	1515.67	1439.08	1510.2
AT1G01715	Mock < TCV < NES	5.67131e-08	0.805502	-1.12819	70.7118	158.943	104.386	66.9354	74.4815	49.696	266.491	275.552	188.151
AT1G01720	TCV = Mock = NES	0.537393	0.521155	0.725872	3965.75	2527.02	2951.27	2802.21	1734.35	2044.16	2749.06	1445.89	1515.2
AT1G01725	TCV > Mock = NES	1.11022e-15	2.18838	2.00985	1038.09	660.776	744.935	186.058	184.43	165.653	181.459	176.384	248.926
AT1G01730	TCV > Mock > NES	0	2.32212	1.77979	1990.73	1466.21	1844.78	340.35	340.487	379.346	514.573	454.964	574.444
AT1G01740	TCV = Mock < NES	2.57301e-07	-0.113964	-0.976833	184.636	161.622	141.395	200.806	134.776	192.158	351.523	353.524	254.753
AT1G01750	TCV = Mock = NES	0.797162	0.129796	2.21651	0	2.67882	0.948961	0	0	3.31307	0	0.757011	0
AT1G01760	TCV = Mock < NES	1.16662e-12	0.179999	-1.50795	88.3898	56.2552	84.4576	83.9529	60.2945	57.9787	257.725	224.075	169.836
AT1G01770	TCV > Mock > NES	0	1.67951	1.14891	1325.85	1006.34	1110.28	400.478	293.197	381.003	513.696	495.085	543.64
AT1G01780	TCV > Mock = NES	0	1.86707	1.59572	587.301	468.794	496.307	155.426	169.061	101.049	160.421	173.356	179.826
AT1G01790	TCV < Mock < NES	0	-2.972	-0.735968	1138.26	1718.91	1318.11	11090.9	9033.54	12636	2252.02	2154.45	2547.53
AT1G01800	TCV = Mock < NES	5.85441e-05	-0.14667	-0.367634	2118.41	1737.66	1939.68	2146.47	2104.4	2165.09	2585.14	2303.59	2589.16
AT1G01810	TCV = NES > Mock	0.000395998	1.39288	-0.454657	54.016	82.1505	71.1721	23.8245	31.9206	23.1915	119.22	107.496	57.4444
AT1G01820	TCV > Mock > NES	3.33011e-12	1.28992	0.442309	2775.44	2055.55	2237.65	951.845	935.156	1003.86	1939.07	1689.65	1573.48
AT1G01830	TCV > NES > Mock	1.11022e-16	0.880968	1.28566	1677.44	1834.1	1609.44	886.044	789.74	1104.91	731.097	643.46	725.964
AT1G01840	TCV < Mock = NES	0.000122974	-2.04162	-1.54997	7.85687	5.35764	5.69377	24.959	33.1029	19.8784	18.4089	21.1963	15.818
AT1G01860	TCV = Mock < NES	5.88444e-07	-0.0515759	-0.637719	155.173	216.984	186.945	169.04	203.346	207.067	302.432	311.889	255.586
AT1G01880	TCV > Mock = NES	0.413852	0.53785	0.307457	75.6224	103.581	109.131	74.8769	59.1123	64.6049	92.0446	81.0002	59.942
AT1G01900	TCV < Mock < NES	0	-2.10185	-0.627661	63.8371	63.3988	186.945	485.566	412.604	450.577	139.382	152.916	193.146
AT1G01910	TCV > Mock = NES	1.11022e-16	0.548065	0.40563	1487.89	1307.26	1376.94	918.944	958.801	975.699	1085.25	1030.29	1034
AT1G01920	TCV = Mock < NES	1.29023e-08	-0.123927	-1.54272	303.472	237.522	327.392	336.946	322.753	286.581	972.166	957.619	600.252
AT1G01930	TCV = Mock = NES	0.772506	0.208388	0.0118459	641.317	610.771	573.173	503.718	550.926	525.122	622.396	668.441	519.497
AT1G01940	TCV > Mock = NES	1.11022e-16	0.972513	0.685324	342.756	281.276	298.923	137.274	160.785	172.28	178.829	186.982	208.132
AT1G01950	NES < TCV < Mock	5.42344e-13	-0.542035	0.527951	1039.07	719.71	1035.32	1220.72	1424.61	1422.96	653.078	624.534	660.194
AT1G01960	Mock < TCV < NES	1.11022e-16	0.261337	-0.373584	3389.26	3065.46	3440.93	2874.82	2384.59	2996.67	4147.26	4240.02	4433.21
AT1G01970	TCV < Mock < NES	0	-2.55079	-1.2396	376.148	325.03	372.942	2028.48	2320.75	1944.77	816.128	806.974	913.283
AT1G01980	TCV = Mock = NES	0.50501	5.91956	5.91956	0	1.78588	0	0	0	0	0	0	0
AT1G01990	Mock < TCV < NES	3.51951e-08	0.661808	-0.878744	1006.66	937.587	894.87	586.536	643.141	564.878	2024.1	1899.34	1297.08
AT1G02000	NES < TCV < Mock	0	-0.236481	0.438288	491.054	425.04	405.206	502.583	519.006	535.061	325.224	336.87	313.03
AT1G02010	TCV < NES < Mock	1.11022e-16	-0.314307	-0.916539	547.034	615.236	525.725	739.693	699.889	659.301	1058.07	1082.53	1045.65
AT1G02020	TCV > NES > Mock	0	0.674858	0.972839	701.225	718.817	648.141	448.127	373.59	473.769	384.834	330.057	338.839
AT1G02030	TCV = Mock < NES	0.000295792	-0.0247937	-2.06864	4.91054	8.9294	12.3365	7.94149	7.09347	11.5957	21.0388	52.2338	36.6312
AT1G02040	TCV = Mock = NES	0.981251	5.9634	5.9634	0	0.89294	0.948961	0	0	0	0	0	0
AT1G02050	Mock < TCV < NES	-2.22045e-16	1.30146	-1.07275	234.724	206.269	267.607	87.3564	104.038	96.079	540.871	536.721	412.934
AT1G02060	Mock < TCV < NES	0	0.687536	-2.40048	263.205	244.666	251.475	166.771	115.86	188.845	1477.1	1514.02	1018.18
AT1G02065	TCV < Mock < NES	0.000791376	-5.30734	-3.32769	0	0	1.89792	46.5145	24.8272	4.9696	3.50646	8.32712	7.49275
AT1G02067	TCV = Mock = NES	0.99002	-5.81296	0	0	0	0	0	0	1.65653	0	0	0
AT1G02070	TCV = NES < Mock	0.007601	-3.93051	5.02822	0	0	0.948961	5.6725	5.91123	3.31307	0	0	0
AT1G02080	TCV > Mock > NES	0	0.938217	0.576822	8555.15	8306.13	8779.79	4305.42	3493.54	5582.52	6020.59	5765.4	5404.77
AT1G02090	TCV = Mock = NES	0.603317	0.238157	0.170061	1430.93	1192.97	1421.54	1057.35	1304.02	1068.46	1254.44	1150.66	1190.51
AT1G02100	Mock < TCV < NES	1.11022e-16	1.1735	-0.409992	2373.76	2432.37	2472.04	1101.6	1086.48	1038.65	3418.8	3236.98	3014.58
AT1G02110	TCV > Mock = NES	0.224435	2.10016	2.15489	732.653	2990.46	1207.08	339.215	419.697	390.942	394.477	376.235	336.341
AT1G02120	TCV = NES > Mock	1.49991e-13	0.631968	0.0792295	5375.08	6150.57	5020.01	3597.5	3367.03	3712.29	5379.78	5140.86	5140.86
AT1G02130	TCV > Mock = NES	0	0.93743	0.805769	2417.95	2010.9	2141.81	1166.27	1184.61	1080.06	1195.7	1146.12	1416.96
AT1G02140	TCV = Mock > NES	9.253e-08	-0.147616	0.278302	2784.28	2469.87	2554.6	2652.46	3106.94	2890.65	2230.11	2167.32	2041.36
AT1G02145	TCV = Mock < NES	1.11022e-16	-0.0568312	-0.775103	815.15	756.32	768.659	777.132	828.754	828.267	1273.72	1357.32	1373.67
AT1G02150	TCV < Mock = NES	3.98948e-12	-1.28627	-1.36561	882.916	1180.47	1141.6	2459.59	3001.72	2355.59	3190	2992.47	2076.32
AT1G02160	TCV = NES > Mock	2.66454e-15	0.636063	-0.0474612	477.305	446.47	414.696	283.625	319.206	258.419	472.495	484.487	426.254
AT1G02170	TCV > Mock = NES	1.11022e-16	1.94724	1.60674	1984.84	2688.64	1859.96	561.577	554.473	578.131	741.616	651.787	751.772
AT1G02180	TCV < Mock < NES	0	-3.35596	-1.94317	24.5527	13.3941	22.7751	158.83	232.902	230.258	71.0058	72.6731	89.913
AT1G02190	TCV > NES > Mock	2.31165e-05	5.81694	8.54374	166.958	1272.44	468.787	5.6725	16.5514	11.5957	1.75323	0	3.33011
AT1G02205	TCV < Mock < NES	0	-5.9393	-2.54675	41.2486	51.7905	121.467	3113.07	5467.88	4583.63	245.452	226.346	781.743
AT1G02220	TCV > Mock > NES	0	2.06012	1.61673	1542.89	1529.61	1323.8	385.73	357.038	311.429	480.385	451.936	501.182
AT1G02230	TCV = NES > Mock	1.14761e-08	2.01048	-0.396434	276.955	261.632	215.414	45.38	22.4627	119.271	415.515	367.15	209.797
AT1G02250	TCV > Mock = NES	1.06195e-05	7.97952	6.70871	105.086	670.598	246.73	0	2.36449	1.65653	2.62984	3.78506	3.33011
AT1G02260	TCV > Mock = NES	0.00455503	1.67617	1.36466	943.806	2006.44	1098.9	406.151	368.861	491.991	518.956	498.113	555.296
AT1G02270	TCV = Mock > NES	1.71544e-05	0.348535	1.08086	1680.39	1127.78	1103.64	1117.48	1048.65	906.125	539.118	653.301	656.864
AT1G02280	TCV < Mock = NES	5.32907e-15	-2.01297	-2.19373	1010.59	756.32	1158.68	3545.31	5305.92	2956.91	4350.64	5425.5	3608.17
AT1G02290	TCV < NES < Mock	0	-0.356302	-0.955132	308.382	271.454	332.136	370.981	372.407	424.073	596.098	569.273	602.75
AT1G02300	TCV > Mock > NES	0	3.69801	2.07963	741.492	785.787	716.466	73.7424	46.1076	53.0091	162.174	160.486	208.132
AT1G02305	TCV > Mock > NES	0	1.7986	1.03421	8906.74	8231.12	7650.53	2389.26	2274.64	2461.61	4134.99	3590.5	4378.26
AT1G02310	TCV > Mock > NES	0.00169489	7.57721	4.47372	304.454	39.2894	104.386	1.1345	1.18225	0	6.1363	9.84115	4.16264
AT1G02330	TCV = Mock = NES	0.929968	-0.115984	-0.0593171	858.363	712.566	814.209	787.342	974.17	823.298	924.829	848.61	711.811
AT1G02335	NES < TCV < Mock	0	-1.58234	0.625923	136.513	108.046	162.272	364.174	443.342	410.821	84.155	70.4021	109.061
AT1G02340	TCV > Mock > NES	4.42631e-11	2.19199	0.637963	247.491	168.766	202.129	55.5905	36.6496	43.0699	159.544	144.589	93.2431
AT1G02350	TCV < NES < Mock	1.96559e-10	-1.44236	-2.16865	13.7495	9.82234	12.3365	18.152	33.1029	46.383	62.2396	56.0188	43.2914
AT1G02360	TCV = Mock > NES	8.07875e-07	0.363756	1.71712	385.969	308.957	322.647	297.239	115.86	377.69	130.616	93.1124	85.7503
AT1G02370	TCV = Mock < NES	0.000207576	-0.00180446	-1.49242	209.189	166.98	231.547	198.537	204.528	205.41	678.5	685.095	346.331
AT1G02380	TCV < Mock < NES	0	-1.63637	-0.716872	54.9981	48.2188	46.4991	128.198	183.248	154.058	83.2784	87.0563	75.76
AT1G02390	TCV = Mock > NES	7.73998e-07	0.286417	1.27835	815.15	920.621	1117.88	864.488	501.272	974.042	489.151	370.936	316.36
AT1G02400	TCV = Mock > NES	0.00145529	0.615917	2.32835	878.005	356.283	387.176	372.116	445.707	240.198	123.603	114.309	84.9178
AT1G02405	TCV > Mock = NES	1.35463e-06	1.21317	1.20042	41.2486	41.9682	51.2439	21.5555	24.8272	11.5957	19.2855	15.8972	23.3108
AT1G02410	TCV = NES < Mock	8.90399e-14	-0.36488	0.131896	934.967	797.396	781.944	1112.94	1049.83	1075.09	788.953	754.74	750.94
AT1G02420	TCV < NES < Mock	2.20497e-10	-0.532126	-1.52839	149.28	140.192	143.293	174.713	217.533	233.571	470.742	466.319	311.365
AT1G02430	TCV > Mock > NES	1.92006e-08	5.76607	3.21804	35.3559	91.4067	55.1375	0	0	3.31307	4.38307	6.8131	8.32528
AT1G02440	TCV > Mock = NES	0.000480288	3.5062	2.4381	35.3559	95.2178	40.7076	2.269	1.18225	11.5957	7.88953	12.8692	10.8229
AT1G02450	TCV = NES > Mock	0.223752	1.43949	-0.0303541	743.456	196.447	375.789	98.7014	89.8506	296.52	555.774	430.739	357.154
AT1G02460	TCV > Mock = NES	1.70134e-07	1.68944	1.32321	253.384	151.8	249.577	94.1634	42.5608	66.2614	84.155	81.7572	95.7407
AT1G02470	TCV > Mock > NES	0	5.74743	2.55553	2472.95	2317.18	1664.48	56.725	31.9206	31.4742	345.386	342.926	409.604
AT1G02475	NES < TCV < Mock	5.46991e-08	-0.462775	0.443657	2057.52	2151.09	1599.95	2869.15	2586.75	2549.41	1297.39	1213.49	1759.96
AT1G02490	TCV = Mock = NES	0.876973	-8.56733	-7.7708	0	0	0	5.6725	2.36449	3.31307	1.75323	2.27103	2.49758
AT1G02500	TCV = NES > Mock	1.11022e-16	1.30774	0.0460512	22985.3	24157.6	20920.8	8433.87	9714.51	9346.17	20257.7	21087.3	24580.4
AT1G02510	TCV = Mock = NES	0.837225	4.9432	-0.950183	0	0.89294	0	0	0	0	1.75323	0	0
AT1G02520	TCV = NES > Mock	0.00553769	5.44257	-2.65724	156.013	117.868	196.435	2.269	3.54674	4.9696	1964.48	782.75	219.787
AT1G02530	TCV = Mock = NES	0.535571	0.468885	1.05539	25.6772	29.467	36.0605	19.2865	20.0982	26.5046	15.7861	18.9253	9.1578
AT1G02550	TCV = Mock = NES	0.979381	4.9432	4.9432	0	0.89294	0	0	0	0	0	0	0
AT1G02560	TCV = Mock > NES	0	0.104465	1.12559	9017.72	9583.93	7788.13	8244.41	8642.21	7659.82	3650.22	3419.42	5025.14
AT1G02570	TCV > Mock = NES	0.000101868	9.74899	9.74899	4.91054	15.18	5.69377	0	0	0	0	0	0
AT1G02580	TCV > Mock = NES	0.00566566	4.3515	3.28325	13.7495	18.7517	1.89792	0	0	1.65653	3.50646	0	0
AT1G02590	TCV = Mock = NES	0.972183	6.55503	6.55503	0	0.89294	1.89792	0	0	0	0	0	0
AT1G02610	TCV > Mock > NES	0	5.62355	3.34409	385.969	239.308	355.86	0	8.27572	11.5957	60.4864	13.6262	22.4782
AT1G02620	TCV > Mock = NES	0.00925957	9.30038	2.47417	8.83898	6.25058	3.79585	0	0	0	0.876615	0	2.49758
AT1G02630	TCV = Mock = NES	0.993942	-0.460912	-1.59617	1.96422	0	0.948961	0	2.36449	1.65653	1.75323	3.78506	3.33011
AT1G02640	TCV < Mock < NES	7.83817e-14	-2.09048	-0.746401	42.2307	52.6835	76.8659	225.765	312.113	193.815	91.1679	111.281	85.7503
AT1G02650	TCV = NES < Mock	1.11022e-16	-3.3536	-1.11349	5.89265	8.03646	5.69377	71.4734	69.7525	59.6353	9.64276	12.8692	19.9807
AT1G02660	TCV > Mock = NES	2.65656e-05	1.5178	1.96909	1305.22	593.805	1113.13	377.788	417.333	256.763	245.452	289.935	233.94
AT1G02670	TCV > Mock = NES	0.00358277	1.54067	1.52105	108.032	42.8611	65.4783	26.0935	20.0982	28.1611	29.8049	18.9253	26.6409
AT1G02680	TCV > Mock > NES	1.11022e-16	1.16364	0.544207	619.71	595.591	650.038	277.952	297.926	256.763	444.444	411.814	422.924
AT1G02690	Mock < TCV < NES	0.0266206	0.580227	-0.680174	222.939	234.843	274.25	167.906	156.056	165.653	439.184	489.029	244.763
AT1G02700	TCV = Mock = NES	0.985497	0.950614	0.826222	7.85687	14.287	7.59169	5.6725	4.72898	4.9696	9.64276	3.78506	3.33011
AT1G02705	NES < TCV < Mock	2.88186e-05	-1.0643	1.05041	48.1233	21.4306	29.4178	44.2455	73.2992	89.4529	12.2726	11.3552	24.1433
AT1G02710	TCV = Mock = NES	0.981639	5.98872	5.98872	0.982109	0.89294	0	0	0	0	0	0	0
AT1G02720	TCV < Mock < NES	0	-2.3555	-1.77045	89.3719	80.3646	107.233	417.496	562.749	437.325	254.218	319.459	371.307
AT1G02730	TCV < Mock < NES	2.50244e-13	-1.77135	-0.802748	96.2466	337.531	238.189	863.354	719.987	710.653	327.854	465.562	378.8
AT1G02740	TCV > Mock > NES	0	2.09803	1.1276	1068.53	957.232	866.402	234.841	235.267	205.41	504.053	421.655	397.948
AT1G02750	TCV = Mock < NES	1.67444e-05	0.144182	-1.49618	910.415	803.646	772.454	761.249	814.567	674.21	2949.81	2526.9	1537.68
AT1G02770	TCV > Mock = NES	0	5.28735	4.83301	326.06	491.117	282.79	11.345	11.8225	4.9696	15.7791	13.6262	9.1578
AT1G02780	TCV = Mock = NES	0.938543	-0.143956	-0.308683	10779.6	9312.47	11069.6	9933.67	13970.6	10527.3	14110	14197	10289.2
AT1G02790	TCV = Mock = NES	0.980936	0	-4.71335	0	0	0	0	0	0	0	0.757011	0
AT1G02800	TCV = NES < Mock	2.9316e-11	-5.54509	-2.08999	0.982109	0	0.948961	22.69	22.4627	46.383	4.38307	2.27103	1.66506
AT1G02810	TCV = NES < Mock	0	-3.48951	-1.5419	1.96422	2.67882	5.69377	32.9005	35.4674	48.0395	9.64276	11.3552	9.1578
AT1G02816	TCV = Mock > NES	2.97597e-08	0.220092	0.669698	1167.73	1475.14	1237.45	1144.71	1189.34	997.234	804.732	739.6	894.967
AT1G02820	TCV < Mock < NES	0	-3.60662	-0.950718	97.2287	273.24	47.4481	2042.1	1566.48	1482.6	244.576	221.047	342.169
AT1G02830	TCV < Mock = NES	0.108872	-7.60628	-8.69831	0	0	0	2.269	3.54674	0	7.88953	4.54207	0
AT1G02840	TCV > Mock = NES	2.22045e-16	0.930448	1.21496	4044.32	3247.62	3778.76	1785.7	2227.35	1795.68	1792.68	1551.12	1425.29
AT1G02850	TCV > Mock > NES	0	6.14285	0.845492	2797.05	3509.26	2919	79.4149	4.72898	46.383	1888.23	1871.33	1374.5
AT1G02860	TCV > Mock = NES	0.218121	0.811228	0.524957	750.331	590.234	563.683	346.022	399.599	339.59	645.188	378.506	299.71
AT1G02870	TCV = Mock < NES	0.0316817	0.226683	-1.21658	349.631	297.349	405.206	258.666	377.136	263.389	1074.73	915.984	454.56
AT1G02880	TCV = Mock = NES	0.851198	-0.259487	0.0847083	1122.21	1269.51	931.88	1599.64	1007.27	1371.61	1083.5	975.788	1074.78
AT1G02890	TCV > Mock = NES	-2.22045e-16	1.01622	1.01186	7256.8	5981.81	6303.95	3324.08	2766.45	3571.49	3339.03	3037.13	3315.12
AT1G02900	TCV = NES < Mock	2.10697e-10	-2.54882	-0.621563	4.91054	15.18	11.3875	64.6665	81.5749	38.1003	16.6557	15.1402	16.6506
AT1G02910	TCV = Mock < NES	0.0625459	0.0186009	-0.348742	1485.93	2023.4	1440.52	1665.44	1703.62	1517.39	2074.07	2110.55	2118.78
AT1G02920	TCV > Mock > NES	3.56359e-12	5.24328	2.04509	14182.1	7823.49	7633.15	448.823	72.117	261.517	2884.67	2243.17	2053.82
AT1G02930	TCV > Mock > NES	1.15056e-11	4.63581	1.66929	15360.7	9974.59	7601.47	910.307	102.855	311.644	3642.61	3150.54	3562.41
AT1G02940	TCV = Mock = NES	0.973206	0.162909	-1.39382	2.94633	2.67882	1.89792	3.4035	0	3.31307	8.76615	6.05609	4.99517
AT1G02950	TCV < Mock < NES	0	-3.3406	-2.32076	38.3022	8.03646	37.9585	276.818	299.108	278.298	118.343	143.075	159.845
AT1G02960	TCV = Mock = NES	0.908062	-0.154009	-0.0374391	576.498	493.796	505.796	542.291	610.039	601.322	595.221	509.469	512.837
AT1G02965	TCV = Mock = NES	0.990915	5.07626	0.362908	0.982109	0	0	0	0	0	0	0.757011	0
AT1G02970	TCV < Mock < NES	4.10749e-12	-2.88319	-1.83364	1.96422	25.0023	8.54065	81.6839	107.584	72.8875	33.3114	32.5515	60.7745
AT1G02980	TCV = Mock < NES	0.00766088	8.2841	-1.62172	0	2.67882	6.64273	0	0	0	8.76615	8.32712	11.6554
AT1G02990	TCV > Mock = NES	0.119848	0.138017	0.375585	1313.08	1446.56	1196.64	1331.9	964.712	1298.72	991.451	1059.82	998.201
AT1G03000	TCV = NES > Mock	0.253049	0.191426	0.0152489	915.325	964.376	954.655	823.646	750.726	907.781	967.783	974.274	862.499
AT1G03010	TCV < NES < Mock	5.3905e-06	-0.628591	-1.90007	11.7853	13.3941	30.3668	27.228	27.1916	31.4742	48.2138	90.0843	69.0998
AT1G03020	TCV = Mock < NES	0.274481	-0.0680111	-1.15994	7.85687	18.7517	1.89792	14.7485	11.8225	3.31307	27.1751	17.4113	19.1481
AT1G03030	TCV = NES > Mock	0.00243796	0.446011	0.040136	830.864	802.753	669.967	576.326	508.366	606.292	739.863	681.31	819.207
AT1G03040	TCV > Mock = NES	2.22045e-16	0.965294	0.93436	2731.24	2194.85	2453.06	1293.33	1309.93	1176.14	1219.37	1140.06	1501.88
AT1G03050	TCV > Mock > NES	3.9968e-15	6.39221	2.03356	24.5527	42.8611	30.3668	1.1345	0	0	7.88953	6.8131	9.1578
AT1G03055	TCV < Mock < NES	0	-3.6338	-1.52932	57.9444	51.7905	52.1929	644.396	786.193	579.787	149.025	146.103	172.333
AT1G03060	TCV = Mock = NES	0.967467	0.0838299	0.0520763	3319.53	4297.72	3872.71	3482.91	2691.97	4666.46	3640.58	3688.16	3753.87
AT1G03070	TCV > Mock = NES	3.89856e-11	1.37125	1.31049	65.8013	52.6835	81.6107	28.3625	22.4627	26.5046	28.0517	23.4674	29.1385
AT1G03080	TCV > Mock = NES	5.92748e-13	0.475507	0.499757	7678.12	7193.53	7187.43	5568.12	4442.88	5854.19	4879.24	5414.15	5307.36
AT1G03090	TCV > Mock = NES	0	2.02088	2.33265	2531.88	1826.96	2099.1	612.63	446.889	531.748	559.28	366.393	356.322
AT1G03100	TCV = Mock < NES	0.00351222	-0.203073	-1.17824	95.2645	91.0799	95.8451	93.0289	115.86	115.957	269.997	235.431	133.204
AT1G03103	TCV > Mock = NES	2.07865e-09	9.91167	4.99421	6.87476	12.5012	9.48961	0	0	0	0.876615	0	0
AT1G03106	TCV > Mock = NES	0.0109491	4.55224	1.72563	9.82109	8.9294	8.54065	1.1345	0	0	2.62984	2.27103	3.33011
AT1G03110	TCV < Mock = NES	7.09122e-12	-2.721	-2.40724	72.676	53.5764	103.437	450.396	588.758	475.425	506.683	508.712	203.137
AT1G03120	TCV = NES < Mock	2.45478e-07	-2.67169	0.436072	1.96422	1.78588	3.79585	11.345	23.6449	13.2523	0.876615	3.02805	1.66506
AT1G03130	TCV = NES < Mock	0	-2.37711	-0.142379	5834.71	5645.17	5293.31	29687.6	33728.3	23719.9	5900.49	5686.67	6925.8
AT1G03140	TCV = NES > Mock	4.38087e-07	0.855946	0.152649	1807.08	1472.46	1601.85	914.406	974.17	808.389	1674.33	1481.47	1235.47
AT1G03150	TCV = Mock < NES	1.64454e-08	0.0697513	-0.399204	640.335	658.097	692.742	613.764	740.086	543.343	835.414	912.199	878.317
AT1G03160	TCV < Mock = NES	0	-1.26232	-1.05343	1154.96	929.551	1078.02	2501.57	2359.76	2725	2365.11	2134.77	2063.84
AT1G03165	TCV = Mock = NES	0.939194	1.53863	1.23305	8.83898	9.82234	4.74481	5.6725	2.36449	0	3.50646	2.27103	4.16264
AT1G03170	TCV > Mock = NES	0.0408139	1.13846	0.580596	35.3559	52.6835	49.346	18.152	17.7337	26.5046	28.0517	19.6823	44.124
AT1G03180	TCV = NES < Mock	1.50707e-06	-1.45863	-0.538542	18.6601	18.7517	25.622	52.187	61.4768	59.6353	29.8049	31.7945	29.971
AT1G03190	TCV > Mock = NES	0	0.743529	0.633919	659.977	603.628	649.09	398.209	366.496	377.69	425.158	410.3	397.116
AT1G03200	TCV > Mock > NES	9.99201e-16	2.9798	1.49081	811.388	509.78	569.677	102.112	44.9253	92.6251	211.24	208.941	252.586
AT1G03210	TCV > Mock > NES	1.33227e-15	1.64092	1.14659	584.355	742.926	619.672	211.017	196.253	217.006	229.673	255.113	394.618
AT1G03220	TCV > NES > Mock	3.70302e-11	1.64228	2.86123	2061.47	1149.1	1301.03	524.139	461.075	460.055	191.979	257.384	171.501
AT1G03230	TCV > Mock = NES	0.258382	0.254817	0.523737	211.131	175.135	166.068	150.888	135.959	176.055	122.726	166.542	94.9081
AT1G03240	TCV > Mock = NES	4.35956e-11	2.09475	1.79544	25.3688	40.2716	40.5055	9.06919	2.36449	13.3931	8.79069	12.1061	9.66065
AT1G03250	TCV = Mock > NES	1.17198e-09	0.0452946	0.477254	969.341	1151.89	981.226	1010.84	1033.28	962.447	797.719	753.226	677.677
AT1G03260	TCV = Mock > NES	0.00341174	-0.0208505	0.339361	248.473	241.094	255.271	246.186	290.832	218.663	195.485	189.253	203.969
AT1G03270	TCV < Mock < NES	0	-5.47839	-3.03601	2.94633	4.4647	9.48961	301.777	221.08	231.915	45.584	49.9627	43.2914
AT1G03280	TCV > Mock = NES	0	0.770519	0.65948	2475.9	2343.08	2114.29	1364.8	1331.21	1368.3	1440.28	1406.53	1542.67
AT1G03290	TCV > Mock > NES	0	1.67953	1.15325	5215.98	6026.45	4758.09	1851.37	1313.47	1830.26	2265.17	2192.3	2736.52
AT1G03300	TCV < Mock = NES	0.00164601	-1.46087	-1.15723	47.1412	31.2529	76.8659	107.91	195.07	124.462	125.356	146.86	74.095
AT1G03310	TCV < Mock < NES	1.11022e-16	-1.66549	-1.11406	1038.09	1101	970.787	3227.65	2721.53	3916.05	2104.75	2090.87	2535.88
AT1G03320	TCV > Mock = NES	0.0118872	3.79436	4.23741	8.83898	81.2576	30.3668	2.269	4.72898	1.65653	0	3.02805	3.33011
AT1G03330	TCV < Mock = NES	1.04117e-05	-0.261067	-0.310684	834.792	772.393	729.751	932.558	1021.46	846.489	998.464	932.638	967.397
AT1G03340	TCV > Mock > NES	0	2.68719	0.773172	521.5	578.625	388.125	90.7599	50.8366	89.4529	264.738	292.206	313.863
AT1G03350	TCV > Mock = NES	5.55112e-16	0.364904	0.402653	2451.34	2229.67	2192.1	1698.35	1892.77	1745.99	1713.78	1688.89	1796.59
AT1G03360	TCV < NES < Mock	0.000498019	-0.900361	-2.10752	205.261	175.909	289.433	344.888	555.655	351.185	1165.02	1184.72	540.31
AT1G03365	TCV = Mock = NES	0.658182	0.00904107	0.132778	1028.27	940.266	912.901	967.728	939.885	955.821	884.504	831.955	911.618
AT1G03370	TCV > Mock = NES	0.00121206	0.444256	0.461712	2759.72	3157.44	2841.19	2324.59	1682.34	2430.14	2409.81	2108.28	1841.55
AT1G03380	TCV > Mock = NES	-2.22045e-16	1.35583	1.43293	5534.18	5411.05	4689.77	2188.45	1740.27	2180	1790.92	1648.01	2351.89
AT1G03390	TCV > NES > Mock	6.25826e-06	6.02876	8.57448	63.8371	381.453	143.293	5.6725	0	3.31307	0	1.51402	0
AT1G03395	TCV > Mock = NES	0.138242	8.23658	8.23658	0.982109	8.03646	0	0	0	0	0	0	0
AT1G03400	TCV > Mock = NES	0	1.47239	1.35663	3306.76	3211.91	2919	1098.2	936.338	1366.64	1282.49	1049.97	1352.86
AT1G03410	TCV > NES > Mock	0	0.427075	1.84445	782.74	828.649	711.721	586.536	611.221	530.091	185.842	177.141	283.892
AT1G03430	TCV > Mock = NES	3.0916e-06	0.681885	0.782113	1108.8	1270.65	1098.9	786.208	576.936	805.076	554.897	591.983	875.819
AT1G03440	TCV < Mock < NES	0	-1.74947	-0.992446	425.253	394.68	394.768	1345.52	1324.11	1414.68	845.057	802.432	769.255
AT1G03445	TCV = Mock = NES	0.81285	-0.336071	2.24272	2.94633	0.89294	3.79585	6.80699	1.18225	1.65653	0	0.757011	0.832528
AT1G03457	TCV < Mock < NES	0	-4.28676	-1.73561	13.7495	4.4647	37.9585	280.221	487.085	329.65	51.7203	77.9722	57.4444
AT1G03470	TCV > Mock = NES	4.44089e-16	0.647848	1.00034	173.833	154.479	161.323	99.8359	109.949	102.705	74.5123	87.8133	82.4202
AT1G03475	TCV < Mock < NES	0	-1.23555	-0.526261	2352.15	2945.81	2488.18	5649.81	6977.61	5706.76	3648.47	3623.06	3942.02
AT1G03495	TCV < NES < Mock	0.0120152	-0.385741	-2.17424	4.56288	8.23291	35.5367	60.1443	1.18225	1.83047	52.8248	70.561	94.8673
AT1G03510	TCV = NES > Mock	0.016511	0.911713	-0.392176	37.3201	89.294	67.3762	39.7075	31.9206	31.4742	97.3042	92.3554	64.9371
AT1G03520	TCV > NES > Mock	1.59573e-09	0.271438	0.608456	582.39	631.309	539.01	458.338	466.987	526.778	369.055	345.954	434.579
AT1G03530	TCV = Mock = NES	0.407854	0.374476	-1.21536	500.875	731.318	638.651	424.303	487.085	531.748	1976.77	1781.25	586.099
AT1G03540	TCV = Mock < NES	4.10386e-05	0.484042	-1.66617	56.9623	50.0047	44.6012	32.9005	39.0141	36.4438	197.238	192.281	91.578
AT1G03550	TCV > Mock > NES	0	3.35637	1.90945	1839.49	1572.47	1578.12	169.04	144.234	173.936	404.119	374.721	549.468
AT1G03560	TCV < Mock = NES	1.11022e-16	-1.29118	-1.29986	229.813	268.775	238.189	618.302	618.314	566.535	635.546	679.796	498.684
AT1G03590	TCV = Mock > NES	0	0.120854	0.425874	1748.15	1742.13	1726.16	1633.68	1603.12	1560.46	1232.52	1296	1354.52
AT1G03600	TCV < Mock < NES	0	-2.42072	-0.615228	1974.04	1942.15	2294.59	10547.4	13263.6	9443.91	3193.51	3058.33	3261.84
AT1G03610	TCV = NES < Mock	9.57547e-05	-0.555358	-0.0977627	919.254	733.104	814.209	1340.98	1306.38	977.356	914.309	899.329	825.867
AT1G03620	TCV > Mock > NES	0	3.90192	2.73339	107.05	160.729	121.467	5.6725	15.3692	4.9696	21.0388	16.6542	20.8132
AT1G03630	TCV < Mock < NES	0	-2.70877	-1.3543	1207.99	1451.92	1675.87	9138.39	10075.1	9132.48	3453.86	3314.95	4316.66
AT1G03650	TCV > Mock > NES	5.47762e-12	2.75686	0.778545	144.37	235.736	199.282	43.111	17.7337	24.848	140.258	115.066	82.4202
AT1G03660	TCV = NES > Mock	0.000687332	4.09121	-1.10425	104.104	208.055	189.792	9.07599	7.09347	13.2523	630.286	324.001	124.879
AT1G03670	TCV > Mock = NES	0.00117935	5.56092	5.0396	9.82109	52.6835	17.0813	0	0	1.65653	0.876615	1.51402	0
AT1G03680	TCV = NES < Mock	0	-1.16159	0.121204	3024.89	2961.88	2685.56	6495.01	6509.44	6395.88	2593.9	2280.12	3099.5
AT1G03687	TCV < Mock = NES	0	-1.41365	-1.31877	130.62	114.296	129.059	349.426	357.038	289.894	326.101	342.926	263.911
AT1G03700	TCV = Mock = NES	0.50501	5.91956	5.91956	0	1.78588	0	0	0	0	0	0	0
AT1G03710	TCV = Mock = NES	0.919597	0.380216	0.0157419	20.6243	11.6082	21.8261	13.614	13.0047	14.9088	26.2984	11.3552	15.818
AT1G03730	TCV > Mock > NES	3.66647e-10	1.30942	0.777029	381.058	286.634	337.83	155.426	127.683	122.584	232.303	202.122	152.353
AT1G03740	TCV > Mock > NES	4.82281e-13	1.32345	0.879675	2282.42	1918.04	1760.32	888.313	592.305	901.155	1282.49	1028.02	929.101
AT1G03750	TCV > Mock > NES	0	1.55622	0.959929	715.957	607.199	560.836	255.262	174.972	210.38	306.815	293.72	367.977
AT1G03760	Mock < TCV < NES	0.000325501	0.970364	-0.520858	209.189	201.805	242.934	117.988	89.8506	125.897	406.749	313.403	218.122
AT1G03770	TCV = NES > Mock	5.89444e-08	1.82807	-0.466227	417.396	270.561	364.401	100.97	91.0329	104.362	607.494	520.824	325.518
AT1G03780	TCV < Mock < NES	0	-3.29838	-2.47186	11.7853	17.8588	13.2855	163.368	146.598	112.644	49.967	98.4115	89.913
AT1G03790	TCV > Mock = NES	0.00754205	9.0561	3.16272	5.89265	6.25058	3.79585	0	0	0	1.75323	0	0
AT1G03800	TCV = Mock = NES	0.952197	-1.09078	0.446345	4.91054	3.57176	2.84688	10.2105	10.6402	3.31307	2.62984	1.51402	4.16264
AT1G03820	TCV < Mock < NES	0	-4.21573	-2.79684	15.7137	19.6447	25.622	366.443	371.225	395.912	111.33	162.757	149.855
AT1G03830	TCV < NES < Mock	2.02619e-09	-0.784156	-1.78539	94.2824	84.8293	163.221	204.21	191.524	193.815	441.814	451.936	286.389
AT1G03840	TCV < Mock = NES	0.0771365	-2.07715	-1.54774	2.94633	0.89294	4.74481	19.2865	7.09347	9.93921	3.50646	8.32712	13.3204
AT1G03850	TCV > Mock = NES	3.10489e-06	7.1872	5.87228	1927.88	326.816	975.532	7.94149	5.91123	8.28267	12.2726	21.1963	21.6457
AT1G03860	TCV = NES > Mock	6.65327e-05	0.522931	-0.0585794	1151.03	1354.59	1300.08	741.962	896.142	1010.49	1478.85	1332.34	1152.22
AT1G03870	TCV = NES < Mock	0.00170752	-2.04834	-0.431115	888.808	682.206	1864.71	2919.07	6892.49	4399.76	1506.02	1342.18	1784.11
AT1G03900	TCV > Mock > NES	0	1.08176	0.479416	3906.83	3784.28	3751.24	1743.73	1871.49	1790.71	2629.84	2609.42	2967.96
AT1G03905	TCV > Mock = NES	0.121182	1.56677	1.10693	150.263	440.22	240.087	104.374	106.402	69.5745	133.245	115.823	136.535
AT1G03910	TCV = Mock = NES	0.392817	0.453748	0.173827	1790.38	2353.79	2133.26	1511.15	1558.2	1514.07	2106.51	1919.02	1539.34
AT1G03920	TCV = Mock > NES	0.0762779	0.835897	2.54957	69.7297	375.035	161.323	103.239	133.594	102.705	30.6815	37.8506	34.9662
AT1G03930	TCV < Mock < NES	0	-1.56268	-0.486072	1003.71	895.619	952.757	2728.47	2931.97	2764.76	1376.29	1317.2	1301.24
AT1G03940	TCV = Mock = NES	0.84913	0.489116	-0.346136	52.3994	225.717	102.063	234.825	4.72898	31.3002	118.115	110.365	254.794
AT1G03950	TCV > Mock = NES	0	1.07276	1.03339	871.13	917.943	731.649	400.478	393.688	404.195	378.698	355.795	497.019
AT1G03960	TCV > Mock = NES	0	0.562477	0.476385	439.985	430.397	402.36	276.818	280.192	304.802	326.977	299.776	288.055
AT1G03970	TCV > Mock = NES	1.11022e-16	0.824807	0.776861	1161.83	1090.28	1062.84	726.079	547.38	598.009	684.636	663.142	586.932
AT1G03980	TCV = Mock = NES	0.955826	-0.967697	0.495976	3.92843	6.25058	5.69377	9.07599	15.3692	6.62614	0.876615	4.54207	5.82769
AT1G03982	TCV > Mock = NES	0.422293	7.96522	7.96522	2.94633	3.57176	0.948961	0	0	0	0	0	0
AT1G03990	TCV = Mock = NES	0.668866	-0.713081	-0.58428	4.91054	15.18	8.54065	24.959	15.3692	6.62614	14.0258	18.9253	9.99033
AT1G04000	TCV = Mock > NES	0	0.00474837	1.32429	395.79	358.069	425.135	395.94	403.146	376.033	156.914	141.561	172.333
AT1G04010	TCV < NES < Mock	0	-0.740182	-1.02538	249.456	228.593	261.913	422.034	353.491	460.517	483.015	475.403	547.803
AT1G04020	TCV < Mock < NES	0	-2.89872	-1.6644	37.3201	113.403	32.2647	458.338	374.772	531.748	167.433	177.898	234.773
AT1G04030	TCV = NES > Mock	3.00276e-10	1.07821	0.119648	235.706	235.736	190.741	119.122	85.1217	109.361	198.992	233.159	177.328
AT1G04040	TCV < Mock < NES	2.89246e-12	-4.68582	-2.82078	83.4792	33.9317	659.528	3883.39	9494.61	6619.48	1719.92	2053.01	1716.67
AT1G04050	TCV = NES < Mock	9.71747e-05	-1.28902	0.318755	28.4811	94.6517	85.4065	137.274	145.416	226.945	52.5969	44.6637	69.9323
AT1G04070	TCV > Mock > NES	1.11022e-16	2.10091	1.00143	420.342	454.507	510.541	110.046	121.771	91.1094	227.92	246.786	217.29
AT1G04080	TCV = NES > Mock	2.50908e-11	0.56608	-0.00297683	4277.08	3942.33	4127.98	2866.88	2580.84	2892.31	4399.73	4330.86	3642.31
AT1G04090	TCV > Mock = NES	0.172652	2.88941	1.359	50.0875	281.276	130.957	35.1695	18.9159	8.28267	79.7719	61.3179	39.1288
AT1G04100	TCV > NES > Mock	7.68935e-11	0.367159	1.05536	295.615	372.356	302.719	292.701	199.799	260.076	145.518	148.374	173.166
AT1G04110	TCV = NES < Mock	1.11022e-16	-2.47162	0.0414836	22.5885	101.795	68.3252	408.42	413.786	246.824	35.9412	52.2338	99.0708
AT1G04120	TCV = Mock = NES	0.85208	-0.2353	-0.0402515	5132.5	5196.02	5577.99	6630.01	5339.02	6755.35	4929.2	5816.12	5611.24
AT1G04130	TCV = NES < Mock	0.00631278	-0.668427	0.0242038	547.034	302.707	565.581	682.968	719.987	846.489	434.801	438.31	518.665
AT1G04140	TCV = NES > Mock	4.66294e-15	0.867169	0.0762128	4288.87	4444.16	4071.99	2281.48	2132.77	2605.73	4497.91	4174.92	3473.3
AT1G04160	TCV < Mock < NES	0	-4.54015	-2.4346	29.4633	25.8953	55.9887	945.038	715.258	930.973	172.693	185.468	243.931
AT1G04170	TCV < Mock = NES	2.45247e-06	-0.64219	-0.956411	2090.91	1913.57	2280.35	2908.86	3735.9	3163.98	4548.75	4455.77	3191.08
AT1G04180	TCV = Mock = NES	0.922913	-0.836669	-1.8143	0	0.89294	0.948961	0	0	3.31307	0.876615	1.51402	4.16264
AT1G04190	TCV < Mock = NES	2.22991e-08	-0.653571	-0.773698	662.923	655.418	705.078	928.02	1204.71	1050.24	1270.21	1222.57	966.564
AT1G04200	NES < TCV < Mock	0.00037257	-0.316581	0.474953	1330.76	835.792	1218.47	1538.38	1353.67	1323.57	732.85	825.142	877.484
AT1G04210	TCV = Mock < NES	0.00229355	-0.249071	-1.01255	2861.86	2564.52	2911.41	3189.08	3300.83	3419.09	6628.96	6278.65	3913.71
AT1G04220	TCV < Mock < NES	1.215e-09	-4.61447	-2.17005	9.82109	8.03646	36.0605	418.63	243.543	659.301	47.2557	43.1496	152.353
AT1G04230	TCV > Mock = NES	0.167406	0.478411	0.234255	550.963	499.154	513.388	410.728	353.595	357.901	531.356	441.393	356.419
AT1G04240	TCV < Mock < NES	0	-5.29077	-4.32385	134.549	43.7541	409.951	7236.94	7560.35	8231.24	4413.62	3630.57	3737.12
AT1G04250	TCV < Mock < NES	1.11022e-16	-3.03495	-2.21884	166.958	186.625	223.955	1634.81	1553.47	1545.55	971.289	719.161	998.201
AT1G04260	TCV > Mock > NES	0	1.8599	1.03739	816.132	866.152	810.413	228.034	223.444	235.228	430.418	394.403	389.623
AT1G04270	TCV < Mock = NES	2.65524e-05	-0.969662	-0.776935	3586.66	3051.18	3983.74	5960.66	8106.66	6733.81	6673.67	6910.76	4615.53
AT1G04280	TCV = NES > Mock	1.29893e-11	3.03952	0.26404	1470.22	1602.83	1285.84	205.344	177.337	147.432	1605.08	1384.57	640.214
AT1G04290	TCV = Mock > NES	1.16197e-08	0.126263	0.672297	705.154	806.325	632.957	635.32	650.235	679.179	402.366	417.113	526.157
AT1G04300	TCV > Mock > NES	0	1.09855	0.546309	4619.84	4666.51	4012.21	2221.35	1750.91	2237.98	3280.29	2919.79	2906.35
AT1G04310	TCV = Mock < NES	0	0.13547	-0.865623	120.799	153.586	169.864	140.678	131.229	132.523	260.355	261.926	287.222
AT1G04330	TCV = Mock = NES	0.998705	-0.250798	0.216969	6.87476	5.35764	6.64273	5.6725	11.8225	4.9696	5.25969	6.8131	4.16264
AT1G04340	TCV > Mock = NES	0	0.702952	0.708683	929.075	891.154	1000.21	613.764	580.482	538.374	522.462	606.366	596.922
AT1G04350	TCV = Mock > NES	1.62237e-09	-0.121701	0.583976	4344.85	3845	3371.66	4069.45	4157.96	4351.72	2434.36	2258.16	3020.41
AT1G04360	TCV < Mock < NES	4.23805e-12	-2.75521	-1.89735	10.8032	4.4647	9.48961	64.6665	57.93	44.7264	32.4347	42.3926	17.4831
AT1G04370	TCV = Mock = NES	0.323858	0.142811	-2.07553	0.982109	2.67882	0	0	0	3.31307	12.2726	0.757011	2.49758
AT1G04380	TCV > Mock = NES	4.30462e-05	2.91913	3.22837	14.7316	55.3623	44.6012	5.6725	1.18225	8.28267	3.50646	4.54207	4.16264
AT1G04390	TCV = NES > Mock	9.82214e-13	0.824277	0.0195672	776.848	793.824	705.078	405.016	394.87	485.365	846.81	746.413	651.869
AT1G04400	TCV > Mock > NES	0	1.97067	1.45337	5037.23	5087.97	4710.64	1420.39	1228.35	1136.38	1927.68	1703.28	1786.6
AT1G04410	TCV > Mock = NES	2.28647e-06	0.702653	0.581473	16132.1	20646.6	16311.7	10026.7	11526.9	11067.3	11203.1	10994.8	13281.3
AT1G04420	TCV < Mock = NES	-2.22045e-16	-2.47864	-2.38824	828.9	584.876	773.403	4038.82	4504.35	3647.69	3817.66	4012.92	3619.83
AT1G04430	TCV < Mock < NES	1.11022e-16	-2.57192	-1.33825	1260.05	786.68	2081.07	7689.64	9391.76	7462.69	3104.97	3497.39	3834.62
AT1G04440	TCV > Mock = NES	1.11022e-16	1.18387	1.43944	5742.39	4516.49	4402.23	2279.21	2090.21	2083.92	1867.19	1775.19	1763.29
AT1G04445	TCV > Mock = NES	1.69452e-11	2.73529	4.81407	14.7316	18.7517	13.2855	2.269	4.72898	0	0.876615	0.757011	0
AT1G04450	TCV = Mock = NES	0.48583	6.05472	6.05472	1.96422	0	0	0	0	0	0	0	0
AT1G04470	TCV = Mock = NES	0.990695	5.02822	0.314867	0	0	0.948961	0	0	0	0	0.757011	0
AT1G04480	TCV = Mock = NES	0.863352	-0.390828	-0.221484	2132.16	1892.14	2478.69	2381.31	3635.4	2509.65	2552.7	2928.88	2100.47
AT1G04490	TCV > Mock = NES	0	1.63083	2.02536	225.885	194.661	159.425	57.8595	61.4768	67.9179	52.5969	42.3926	47.4541
AT1G04500	TCV > Mock > NES	1.76049e-08	7.84979	3.60025	278.919	91.9729	159.425	2.269	0	0	30.6815	3.02805	9.99033
AT1G04510	TCV = Mock = NES	0.521589	-0.0516722	0.148465	1507.54	1498.35	1493.67	1480.52	1731.99	1451.12	1392.94	1426.97	1239.63
AT1G04520	TCV < Mock < NES	0	-6.06409	-3.93964	15.7137	14.287	65.4783	1808.39	2444.88	2136.93	376.068	504.17	585.267
AT1G04530	TCV = NES < Mock	0	-1.11121	-0.00790547	3838.08	3147.61	2910.46	7114.44	7821.74	6442.26	2814.81	3320.25	3815.47
AT1G04540	TCV < Mock = NES	0.00103163	-1.80222	-1.16145	7.85687	4.4647	11.3875	34.035	27.1916	21.535	12.2726	16.6542	24.1433
AT1G04550	TCV < Mock < NES	0	-1.21512	-0.372434	1308.17	1170.64	1268.76	2592.33	3141.23	2966.85	1564.76	1479.2	1807.42
AT1G04555	TCV > Mock = NES	8.32667e-15	0.89329	0.808605	381.058	361.641	334.983	229.169	190.342	160.684	184.966	184.711	245.596
AT1G04570	TCV = Mock = NES	0.489789	-0.449226	-0.643219	224.903	215.199	199.282	245.052	177.337	450.577	378.698	270.253	349.662
AT1G04580	TCV > Mock = NES	4.996e-15	7.45221	9.64944	374.183	141.978	176.507	2.269	0	1.65653	0	0	0.832528
AT1G04590	TCV < Mock = NES	2.53099e-07	-0.912084	-1.24428	413.468	359.855	427.033	693.179	883.137	682.492	1104.53	1043.16	695.993
AT1G04600	TCV > Mock > NES	1.62339e-05	3.73949	2.14679	766.045	289.313	515.286	61.263	24.8272	31.4742	80.6486	115.823	158.18
AT1G04610	TCV = Mock = NES	0.516502	0	-5.89339	0	0	0	0	0	0	1.75323	0	0
AT1G04620	TCV < Mock = NES	1.20823e-11	-0.674129	-0.52669	541.142	593.805	419.441	876.968	851.217	752.067	761.778	719.918	757.6
AT1G04625	TCV = Mock = NES	0.992256	-5.2786	-6.33428	0	0	0	1.1345	0	0	0.876615	1.51402	0
AT1G04630	TCV = NES < Mock	0	-0.7817	-0.0941506	490.072	548.265	469.736	814.57	972.988	805.076	537.365	516.282	556.128
AT1G04635	TCV < Mock = NES	1.66345e-05	-1.51258	-2.2091	28.4811	16.9659	31.3157	65.801	88.6684	64.6049	151.654	139.29	64.1046
AT1G04640	TCV < Mock < NES	-2.22045e-16	-1.35402	-1.02794	737.563	613.45	557.989	1549.73	1877.41	1452.78	1351.74	1367.92	1173.03
AT1G04645	TCV = Mock = NES	0.981728	1.6925	2.09513	0.982109	3.57176	2.84688	2.269	0	0	0.876615	0	0.832528
AT1G04650	TCV < Mock = NES	0.00564567	-0.667244	-0.748475	38.3022	47.3258	45.5501	73.7424	73.2992	61.2918	73.6356	64.346	82.4202
AT1G04660	TCV = NES < Mock	1.11022e-16	-11.8945	-5.89339	0	0	0	23.8245	47.2898	43.0699	1.75323	0	0
AT1G04680	TCV < Mock < NES	0	-4.68016	-2.48409	60.8907	40.1823	569.377	4923.73	6006.99	6258.39	990.575	1093.88	1666.72
AT1G04690	TCV > Mock = NES	0	1.19076	1.10578	4771.08	4615.61	4431.65	1820.87	2163.51	2069.01	1829.5	1929.62	2661.59
AT1G04700	TCV > Mock = NES	0.108385	1.17731	1.2339	96.2466	303.6	185.996	105.508	75.6637	77.8571	91.1679	77.9722	79.9226
AT1G04710	TCV > NES > Mock	1.79228e-11	0.288576	0.546409	846.578	722.389	717.449	587.671	626.59	657.644	506.683	535.207	523.66
AT1G04730	TCV > Mock = NES	0.333076	1.69312	2.35322	225.885	1350.13	526.674	212.151	204.528	233.571	116.59	156.701	138.2
AT1G04750	TCV > Mock = NES	1.11022e-16	0.762022	0.891517	3312.65	3157.44	3244.5	1859.44	1992.08	1876.85	1550.73	1574.58	2111.29
AT1G04760	TCV < Mock < NES	-2.22045e-16	-4.16416	-2.80414	0.982109	4.4647	0.948961	39.7075	30.7384	44.7264	21.9154	12.1122	10.8229
AT1G04770	TCV = Mock = NES	0.786387	0.209491	-0.335712	604.979	400.93	381.482	217.824	331.029	651.018	662.721	616.964	471.211
AT1G04778	TCV = Mock = NES	0.997994	-0.076895	0.664284	1.96422	9.82234	6.64273	4.538	8.27572	6.62614	5.25969	3.02805	3.33011
AT1G04780	TCV > Mock > NES	0	1.02534	0.415197	3635.77	3479.79	3255.89	1789.11	1573.57	1732.74	2574.62	2489.05	2714.04
AT1G04790	Mock < TCV < NES	0.00150523	0.414408	-0.330221	1290.49	1491.21	1241.24	1046.39	969.727	1002.4	1846.15	1849.75	1361.77
AT1G04800	TCV < Mock < NES	0	-8.68885	-5.60854	5.89265	5.35764	48.397	9068.81	7686.68	7871.65	814.375	630.973	1466.32
AT1G04810	Mock < TCV < NES	0	1.10215	-0.285037	2499.47	2916.34	2923.75	1227.53	1250.82	1406.4	3200.52	3355.07	3605.68
AT1G04820	TCV < Mock = NES	1.32575e-09	-1.04468	-0.867241	4145.45	4406.38	5428.88	7809.99	11439.6	9591.34	7626.6	8481.4	9395.24
AT1G04830	TCV > Mock > NES	1.11022e-16	1.54135	0.732164	937.914	1254.58	1004	375.519	358.22	364.438	639.929	628.319	656.032
AT1G04840	TCV > Mock = NES	0.122568	4.24428	2.13402	289.722	1518.89	536.163	34.035	36.6496	53.0091	188.472	206.664	139.032
AT1G04850	TCV > Mock = NES	0.0646733	0.255426	0.124378	2714.55	2899.38	2619.13	2147.61	2501.63	2247.92	2431.73	2458.02	2663.26
AT1G04860	TCV = NES > Mock	0.0760196	0.242164	-0.182025	1660.75	1857.32	1620.83	1465.77	1441.16	1437.87	2177.51	1976.56	1675.88
AT1G04870	TCV = Mock < NES	0.0804103	-0.142656	-1.14488	725.778	867.045	858.81	774.863	1048.65	882.933	2276.57	2100.71	1043.99
AT1G04880	TCV < Mock = NES	9.01875e-05	-2.58936	-3.49155	0.982109	2.67882	0	6.80699	7.09347	8.28267	16.6557	18.1683	6.66022
AT1G04890	TCV > Mock = NES	0.117324	7.937	7.937	1.96422	5.35764	0	0	0	0	0	0	0
AT1G04900	TCV < NES < Mock	0	-0.936739	-2.51323	95.2645	118.761	155.63	220.093	242.36	245.167	755.642	781.236	573.611
AT1G04910	Mock < TCV < NES	9.15465e-11	0.46278	-0.220939	1240.4	1317.09	1291.54	881.506	983.628	927.66	1370.15	1438.32	1677.54
AT1G04920	TCV = Mock = NES	0.833963	-0.51945	-0.162342	90.354	328.602	179.354	281.356	231.72	344.559	220.03	242.244	207.299
AT1G04930	TCV > Mock = NES	0.000691765	0.790983	0.565367	180.708	144.656	158.477	65.801	127.683	86.1398	113.96	118.094	94.9081
AT1G04940	TCV < Mock < NES	0	-1.12445	-0.79782	805.159	712.982	738.209	1631.04	1733.61	1554.65	1188.44	1256.68	1477.5
AT1G04945	Mock < TCV < NES	0.000533609	0.695245	-1.10226	546.222	617.499	528.654	304.419	383.798	356.99	1542.22	1330.02	761.166
AT1G04950	TCV = NES > Mock	0.000182071	0.684703	0.248025	1165.76	1578.72	1232.7	817.974	776.735	879.62	1104.53	1118.86	1125.58
AT1G04960	TCV > NES > Mock	0	0.73728	0.999074	1483.97	1332.27	1288.69	824.781	819.296	818.328	738.986	632.104	682.673
AT1G04970	TCV > Mock > NES	0	1.79731	1.12228	3543.45	3291.38	3258.73	1033.53	841.759	1028.71	1575.28	1325.53	1735.82
AT1G04980	TCV > Mock > NES	0.000105857	1.93169	1.07922	699.261	1170.64	943.267	232.572	244.725	260.076	277.887	371.693	681.84
AT1G04985	TCV = NES > Mock	0.0344573	0.197702	-0.185192	998.804	1177.79	966.992	880.371	994.268	866.368	1270.21	1190.02	1113.92
AT1G04990	TCV = NES > Mock	0.00130452	0.795119	0.137107	1054.78	900.084	780.046	623.975	446.889	505.243	738.11	770.638	978.22
AT1G05000	TCV > Mock > NES	0	5.2647	3.08094	489.09	548.265	371.044	12.4795	14.1869	9.93921	49.0904	75.7011	41.6264
AT1G05005	TCV > Mock = NES	0.00213986	10.6517	10.6517	1.96422	33.9317	12.3365	0	0	0	0	0	0
AT1G05010	TCV = NES < Mock	1.95852e-11	-0.82972	-0.0109778	8066.06	8759.74	6259.35	12446.6	13394.8	15188.8	8738.1	7578.44	6944.94
AT1G05020	TCV = Mock > NES	0.000204086	-0.30565	0.997831	43.2128	35.7176	38.9074	68.0699	46.1076	31.4742	20.1621	19.6823	19.1481
AT1G05030	NES < TCV < Mock	0	-0.502531	0.445552	423.289	450.935	386.227	628.513	600.581	556.596	283.147	295.234	347.164
AT1G05035	TCV = Mock = NES	0.984904	-5.33658	0	0	0	0	0	1.18225	0	0	0	0
AT1G05040	TCV > Mock = NES	0.000207815	12.6088	5.61817	19.6422	125.012	42.7033	0	0	0	0	3.78506	0
AT1G05055	TCV = Mock = NES	0.637907	0.518156	0.18979	344.72	576.839	392.87	272.28	335.758	309.772	427.788	389.104	335.509
AT1G05060	TCV > Mock > NES	0	1.74575	0.755	1441.74	1313.52	1327.6	381.192	405.51	430.699	842.427	817.572	759.265
AT1G05065	TCV < Mock < NES	0	-3.61005	-2.97477	2.94633	4.4647	7.59169	51.0525	57.93	74.5441	42.0775	30.2805	45.789
AT1G05070	NES < TCV < Mock	6.18684e-06	-0.536435	0.377281	625.603	461.65	569.377	675.027	879.591	848.146	389.217	371.693	514.502
AT1G05080	TCV = Mock < NES	2.06258e-05	0.192985	-5.48056	0	0	1.89792	0	0	1.65653	46.4606	28.7664	10.8229
AT1G05087	TCV > Mock > NES	1.11022e-16	1.70793	0.561424	275.374	251.149	251.959	101.635	59.876	76.7605	200.704	173.43	153.382
AT1G05090	TCV = NES > Mock	1.62109e-11	0.77617	-0.0326077	466.005	536.528	548.953	268.466	324.922	312.535	587.585	466.257	533.11
AT1G05100	TCV > Mock = NES	0.000578952	1.39485	1.39401	98.2109	159.836	99.6409	78.2804	21.2804	36.4438	63.1163	36.3365	36.6312
AT1G05120	TCV > Mock > NES	0	1.30335	0.717835	1660.75	1578.72	1546.81	655.741	582.847	700.714	1025.64	938.694	945.751
AT1G05140	TCV < Mock < NES	0	-1.21072	-0.162971	1176.57	1184.04	1062.84	2688.76	2778.28	2456.64	1200.96	1232.41	1399.48
AT1G05150	TCV < Mock < NES	2.22045e-16	-0.867304	-0.573912	1272.81	1509.07	1479.43	2526.53	2528.82	2718.37	1998.68	2213.5	2131.03
AT1G05160	Mock < TCV < NES	0	1.40066	-1.06268	951.663	1802.85	1133.06	508.256	487.085	477.082	2671.05	2866.04	2583.33
AT1G05170	TCV < Mock < NES	1.11022e-16	-2.53134	-1.45191	887.826	1096.53	876.84	5682.71	4026.73	6831.55	3063.77	2203.66	2560.02
AT1G05180	TCV = NES > Mock	1.8143e-06	0.562374	-0.164145	1183.44	1422.45	1241.24	881.506	877.226	846.489	1591.06	1495.85	1223.82
AT1G05190	TCV < Mock < NES	0	-2.56118	-1.37146	2969.9	2238.6	2741.55	15484.8	17805.8	13630	6619.32	6823.7	7126.44
AT1G05200	TCV = NES < Mock	6.66822e-12	-0.552407	-0.0265294	1714.76	1363.52	1318.11	2090.88	2110.31	2246.26	1505.15	1495.1	1477.74
AT1G05205	TCV = Mock = NES	0.785219	-0.15623	0.185818	253.384	244.666	286.586	241.648	359.403	273.328	198.115	220.29	271.404
AT1G05210	TCV < Mock < NES	0	-2.6374	-1.18	9.82109	29.467	28.4688	128.198	156.056	137.492	40.3243	49.9627	63.2721
AT1G05220	Mock < TCV < NES	0.00735154	2.66687	-0.953266	5.89265	14.287	1.89792	2.269	1.18225	0	12.2726	11.3552	19.1481
AT1G05230	TCV = NES < Mock	0.00666577	-0.488809	-0.113129	959.52	956.339	1360.81	1556.53	1469.53	1572.05	1158.88	1161.26	1223.82
AT1G05260	TCV < Mock < NES	0.0305237	-4.75425	-1.97746	0	0	1.89792	6.80699	7.09347	38.1003	4.38307	1.51402	1.66506
AT1G05270	TCV > Mock = NES	3.17397e-05	0.435408	0.270789	1397.54	1402.81	1272.56	1007.44	1123.13	881.277	1218.49	1081.77	1075.63
AT1G05300	TCV > Mock = NES	0.00112724	1.10256	1.03278	86.4255	92.8658	146.14	63.532	36.6496	51.3526	66.6227	49.9627	42.4589
AT1G05310	TCV = NES < Mock	1.11022e-16	-2.31693	0.561615	20.6243	34.8247	29.4178	132.736	139.505	150.745	21.9154	18.9253	16.6506
AT1G05320	TCV < Mock < NES	2.22045e-16	-3.30024	-2.25169	145.352	172.337	184.098	1834.49	1458.89	1649.91	701.292	807.731	880.814
AT1G05330	TCV > Mock = NES	5.72893e-09	3.31804	2.93583	17.678	9.82234	18.9792	2.269	2.36449	0	4.38307	0	1.66506
AT1G05340	TCV > Mock > NES	-2.22045e-16	5.69695	2.61282	2256.89	1322.44	1875.15	47.649	42.5608	14.9088	561.033	207.421	123.214
AT1G05350	TCV < Mock = NES	0.367809	-0.385466	-0.247908	727.742	686.671	760.118	891.716	1067.57	881.277	716.194	839.526	1026.51
AT1G05360	TCV < Mock = NES	1.21024e-07	-0.348059	-0.379958	458.645	417.896	512.439	622.84	576.936	568.191	575.059	639.675	592.76
AT1G05370	TCV < Mock < NES	6.41325e-08	-2.27793	-1.29934	14.7316	5.35764	4.74481	46.5145	34.2851	39.7568	16.6557	29.5234	14.9855
AT1G05380	TCV = NES > Mock	4.59632e-14	0.513838	-0.0950262	2238.23	2293.07	2405.62	1565.61	1434.06	1858.63	2579	2563.24	2266.97
AT1G05385	TCV < Mock < NES	1.11022e-16	-1.35998	-0.956532	435.074	271.454	385.278	884.909	1079.39	838.207	710.935	750.198	657.697
AT1G05400	TCV > Mock > NES	1.11022e-16	3.41894	1.12803	143.388	164.301	142.344	12.4795	13.0047	16.5653	81.5252	80.2432	44.124
AT1G05410	TCV = Mock < NES	2.23155e-14	0.00484034	-1.42576	494.983	442.005	466.889	477.624	510.73	410.821	1415.73	1378.52	977.387
AT1G05420	TCV = Mock = NES	0.771893	0.324714	-0.286379	9.82109	0	13.2855	5.6725	9.45796	3.31307	9.64276	6.05609	12.4879
AT1G05430	TCV = NES > Mock	1.61919e-05	0.375778	0.10528	957.556	950.981	929.982	728.348	735.357	723.906	924.829	928.853	785.073
AT1G05440	TCV < Mock = NES	9.02785e-06	-2.88543	-2.26875	2.94633	7.14352	0.948961	40.842	26.0094	14.9088	14.0258	23.4674	15.818
AT1G05450	TCV > Mock = NES	0.0172896	8.81994	8.81994	8.83898	0.89294	3.79585	0	0	0	0	0	0
AT1G05460	TCV < Mock < NES	0	-1.06132	-0.761472	236.688	307.171	285.637	585.402	509.548	636.109	423.405	496.599	486.196
AT1G05470	TCV < Mock < NES	0	-3.61621	-2.14877	54.016	50.0047	70.2231	693.179	753.09	690.775	231.426	289.935	251.423
AT1G05490	Mock < TCV < NES	1.60827e-12	2.29853	-0.951985	20.6243	45.54	62.6314	7.94149	8.27572	9.93921	81.5252	96.8975	70.7648
AT1G05500	TCV = NES < Mock	0	-0.477353	0.0667285	1284.6	1159.04	1216.57	1580.36	1762.73	1752.61	1077.36	1229.39	1188.02
AT1G05510	TCV > Mock = NES	2.46054e-05	12.9139	12.9139	17.678	161.622	52.1929	0	0	0	0	0	0
AT1G05520	TCV > Mock > NES	1.11022e-16	1.06092	0.490715	2295.19	2320.75	2217.72	1001.76	1062.84	1210.93	1502.52	1536.73	1824.07
AT1G05530	TCV = Mock = NES	0.804958	-2.12358	0.257083	2.94633	0	0.948961	4.538	5.91123	6.62614	0	0.757011	2.49758
AT1G05540	TCV < Mock < NES	0	-4.59464	-2.63054	24.5527	46.4329	26.5709	731.752	777.917	848.146	193.732	174.113	236.438
AT1G05550	TCV < Mock < NES	5.42814e-05	-2.06134	-1.03094	6.87476	20.5376	0.948961	51.0525	34.2851	33.1307	16.6557	19.6823	21.6457
AT1G05560	TCV = Mock = NES	0.710193	0.970198	1.83008	768.009	4161.1	1648.35	1277.45	1112.49	967.416	882.751	520.067	447.067
AT1G05570	TCV > Mock > NES	0	4.27695	0.849506	12385.4	18638.3	13902.3	959.786	323.935	1033.68	6682.43	7072	11178.3
AT1G05575	TCV > Mock = NES	0.30922	1.52299	0.90015	563.73	264.31	334.034	231.438	101.673	71.231	347.139	142.318	133.204
AT1G05577	TCV = Mock = NES	0.975895	-2.82405	-3.02894	0	0	0.948961	4.538	2.36449	0	1.75323	4.54207	1.66506
AT1G05590	TCV < Mock = NES	1.69381e-06	-0.430504	-0.25027	526.41	538.443	527.622	679.565	696.343	770.289	596.098	607.88	690.165
AT1G05600	TCV = Mock < NES	0.00395677	-0.103914	-0.371312	245.527	291.099	220.159	282.49	262.458	268.359	339.25	330.814	308.868
AT1G05610	TCV < Mock = NES	4.37344e-07	-2.1406	-1.60179	9.82109	3.57176	8.54065	31.766	31.9206	33.1307	14.0258	31.7945	20.8132
AT1G05620	TCV > Mock = NES	2.7045e-13	1.27141	1.06834	806.311	617.022	584.56	271.145	287.286	273.328	270.874	336.113	350.494
AT1G05630	TCV < NES < Mock	1.11022e-16	-1.4137	-1.89829	709.082	552.73	892.024	1666.58	1474.26	2597.45	2418.58	2662.41	2947.98
AT1G05640	TCV < Mock = NES	3.21965e-15	-1.59698	-1.83127	22.5885	25.0023	36.0605	72.6079	66.2057	114.301	88.5381	97.6545	111.559
AT1G05650	TCV = Mock = NES	0.982848	-6.28955	0	0	0	0	1.1345	1.18225	0	0	0	0
AT1G05670	TCV = Mock < NES	0.000169642	0.015085	-0.60743	396.772	504.511	445.063	426.572	422.062	483.708	757.395	741.871	551.966
AT1G05675	TCV = Mock = NES	0.481997	0.189417	-1.84667	267.134	133.941	144.242	268.876	109.949	99.3921	1158.88	534.45	268.074
AT1G05680	Mock < TCV < NES	7.50468e-05	4.98486	-3.22651	239.634	265.203	330.239	9.07599	10.6402	6.62614	4461.97	2492.08	862.499
AT1G05690	TCV = NES > Mock	0.00491707	0.787072	0.00319807	974.252	1159.93	732.598	588.805	506.001	566.535	997.588	796.376	1066.47
AT1G05700	TCV > Mock = NES	1.07361e-05	10.4025	11.0258	99.193	1232.26	309.361	0	1.18225	0	0	0.757011	0
AT1G05710	TCV > NES > Mock	2.10104e-08	0.766502	1.32325	580.426	409.86	451.706	224.631	371.225	251.793	167.433	199.851	208.964
AT1G05720	Mock < TCV < NES	0	1.32583	-0.266914	1301.29	1257.26	1194.74	530.946	477.627	488.678	1427.02	1372.46	1716.61
AT1G05730	Mock < TCV < NES	1.65187e-05	1.11524	-2.29384	57.9444	49.1117	66.4273	30.6315	29.5561	19.8784	348.117	361.094	141.6
AT1G05740	TCV = Mock = NES	0.769188	1.71328	-0.148411	4.91054	2.67882	3.79585	2.269	1.18225	0	2.62984	8.32712	1.66506
AT1G05750	Mock < TCV < NES	0	1.88874	-0.598358	281.865	437.541	333.085	83.9529	87.5985	112.644	597.851	538.992	456.636
AT1G05760	TCV < Mock < NES	1.11022e-16	-3.15429	-2.32245	17.678	4.4647	28.4688	142.947	140.575	167.31	91.1679	81.7572	80.3447
AT1G05770	TCV < Mock = NES	0.456577	-0.770705	-0.656181	8.83898	27.6812	17.0813	35.1695	24.8272	31.4742	18.4089	30.2805	35.7987
AT1G05780	TCV = NES > Mock	1.33653e-06	0.598173	-0.163163	156.155	148.228	161.323	80.5494	119.407	107.675	177.076	152.916	191.481
AT1G05783	TCV > Mock > NES	2.68946e-11	3.8669	2.08209	92.3182	46.4329	74.9679	1.1345	3.54674	9.93921	21.9154	14.3832	14.153
AT1G05785	TCV > Mock = NES	0	0.874583	1.08836	352.577	323.244	387.176	195.134	197.435	187.188	156.037	158.215	185.654
AT1G05790	TCV = NES > Mock	4.73288e-13	1.54068	0.32364	1561.55	2008.22	1367.45	605.823	537.922	553.283	1371.03	1219.55	1354.52
AT1G05800	TCV = Mock = NES	0.754951	0	-7.94584	0	0	0	0	0	0	3.50646	3.02805	0.832528
AT1G05805	TCV > Mock = NES	0	2.69294	2.65386	1900.38	1427.81	1597.1	283.625	274.281	203.754	205.128	245.272	332.178
AT1G05810	TCV < Mock = NES	1.81388e-12	-1.11869	-1.33114	158.119	167.873	293.229	501.449	511.912	331.307	461.976	563.216	532.818
AT1G05820	TCV = Mock = NES	0.561439	1.16594	0.660445	127.674	414.324	217.312	119.122	126.5	92.766	126.233	146.86	207.299
AT1G05830	TCV = Mock > NES	0	0.0706131	0.509726	1681.37	1435.85	1487.97	1445.35	1425.79	1514.07	1064.21	1086.31	1083.95
AT1G05835	TCV = NES < Mock	0	-1.80915	-0.138319	30.4454	141.978	92.0492	315.391	288.468	323.024	92.9212	108.253	89.913
AT1G05840	TCV > NES > Mock	0	0.769651	1.09434	1727.53	1523.36	1421.54	884.909	911.511	944.225	699.539	657.086	831.695
AT1G05850	TCV < Mock < NES	0	-3.40546	-1.68573	1679.41	1521.57	3714.23	23063.2	25745.8	24465.4	6415.94	6408.86	9421.71
AT1G05860	TCV < Mock = NES	2.18361e-08	-0.450093	-0.288336	386.951	345.568	412.798	513.928	543.833	506.9	444.444	482.216	472.043
AT1G05870	TCV = NES < Mock	0.101895	-0.343648	0.223133	2048.68	2229.67	2105.75	2588.93	2520.55	2991.7	1797.06	1394.41	2277.8
AT1G05880	TCV = NES > Mock	1.07288e-10	15.0778	0.695981	202.314	437.541	397.615	0	0	0	419.898	184.711	35.7987
AT1G05890	TCV > Mock > NES	1.11022e-16	1.41906	0.633786	4106.2	4668.29	4037.83	1702.88	1584.21	1504.13	2819.19	2586.71	2851.41
AT1G05894	TCV > Mock = NES	8.18318e-09	5.33263	6.24011	274.99	1018.84	578.866	14.7485	20.0982	11.5957	4.38307	12.8692	7.49275
AT1G05900	TCV = Mock > NES	1.11022e-16	-0.125845	0.798052	1135.32	1260.83	1031.52	1253.62	1391.5	1094.97	615.384	603.338	752.605
AT1G05910	TCV > Mock = NES	2.24277e-08	0.956663	0.719692	1626.37	2293.96	2048.81	920.079	1002.54	1152.95	1263.2	1289.95	1071.46
AT1G05920	TCV > Mock = NES	3.03554e-10	13.6795	13.6795	58.9265	232.164	102.488	0	0	0	0	0	0
AT1G05930	TCV = Mock = NES	0.80027	7.52691	7.52691	0.982109	3.57176	0.948961	0	0	0	0	0	0
AT1G05940	TCV > Mock > NES	1.11022e-16	1.00636	0.26484	1758.96	1825.17	1698.64	847.471	735.357	1046.93	1539.34	1349.75	1507.71
AT1G05950	TCV > Mock > NES	2.41222e-06	1.96618	1.05079	238.652	416.11	266.658	62.3975	75.6637	97.7356	138.505	151.402	154.85
AT1G05960	TCV < NES < Mock	0	-1.07731	-2.40125	1335.67	1320.66	1462.35	3004.15	2746.36	2940.35	7388.11	7845.67	6523.69
AT1G05970	TCV = Mock = NES	0.957151	0.0469248	-0.0323029	179.726	161.622	173.66	130.467	197.435	170.623	188.472	181.683	156.515
AT1G05990	TCV = Mock < NES	0	5.07626	-6.5687	0.982109	0	0	0	0	0	35.9412	40.1216	19.9807
AT1G06000	TCV < Mock < NES	-2.22045e-16	-3.10085	-0.803351	1125.5	817.04	1022.03	9778.25	7230.61	8425.14	1641.9	1383.82	2147.92
AT1G06010	TCV < NES < Mock	7.3248e-11	-0.392555	-0.798063	297.579	233.95	334.983	378.923	425.608	332.964	478.632	485.244	542.808
AT1G06020	TCV > Mock = NES	7.60452e-07	3.00046	3.09636	60.8907	145.549	80.6617	13.614	10.6402	11.5957	12.2726	12.1122	9.1578
AT1G06030	TCV > Mock = NES	1.11022e-16	4.16823	3.81627	47.154	60.6021	43.2926	3.4035	0	4.9696	3.36357	3.87211	3.45915
AT1G06040	TCV = Mock > NES	2.22045e-16	-0.26958	0.809525	15201.1	11027.8	12292.8	14939.1	16769	14728.3	7551.16	6513.33	7914.84
AT1G06045	TCV > Mock = NES	0.149336	8.19389	8.19389	7.86178	0.89294	0	0	0	0	0	0	0
AT1G06050	TCV > Mock = NES	1.89182e-13	0.841637	0.806702	438.02	400.037	472.583	251.859	245.907	233.571	304.185	245.272	199.807
AT1G06060	TCV > NES > Mock	1.11022e-16	0.718171	1.0111	1044.96	1025.99	970.787	614.899	627.772	606.292	486.521	455.721	566.951
AT1G06070	TCV > Mock = NES	7.45078e-09	0.407919	0.323305	1002.73	859.902	949.91	676.161	699.889	743.784	775.804	766.095	705.983
AT1G06080	TCV < Mock < NES	1.11022e-16	-10.211	-5.27835	0	0	0.948961	251.859	588.758	319.711	11.396	9.08414	17.4831
AT1G06090	TCV = NES < Mock	0.14123	-1.34996	1.3041	3.92843	2.67882	5.69377	12.4795	10.6402	8.28267	0.876615	0.757011	3.33011
AT1G06100	NES < TCV < Mock	0.268022	-2.45171	1.25005	0	0.89294	0.948961	10.2105	0	0	0	0.757011	0
AT1G06110	Mock < TCV < NES	0	1.2916	-0.550609	2153.76	2053.76	2087.71	861.085	852.399	858.085	3278.54	3117.37	2824.77
AT1G06130	TCV > Mock = NES	0.00134478	0.774239	0.430616	2309.92	1816.24	1592.36	1101.6	1142.05	1099.94	1514.79	1295.25	1432.78
AT1G06135	TCV = Mock = NES	0.398638	2.44436	-1.23137	21.6064	8.03646	14.2344	5.6725	2.36449	0	86.7849	12.1122	4.16264
AT1G06137	Mock < TCV < NES	0.16355	2.83351	-4.23046	9.82109	8.9294	5.69377	3.4035	0	0	399.736	44.6637	14.9855
AT1G06140	TCV = Mock < NES	0.000112087	0.464396	-1.27874	32.4096	54.4694	52.1929	44.2455	20.0982	36.4438	143.765	119.608	74.095
AT1G06143	TCV = Mock = NES	0.751895	0.801016	0.246388	121.781	393.787	195.486	138.409	112.313	157.371	215.647	225.589	158.18
AT1G06148	TCV = Mock = NES	0.997652	0.799858	0.200475	11.7853	8.03646	4.74481	2.269	3.54674	8.28267	9.64276	7.57011	4.16264
AT1G06150	Mock < TCV < NES	0	0.256204	-0.68048	2039.84	2496.66	2060.19	1943.4	1779.28	1800.65	3413.54	3739.64	3419.19
AT1G06160	TCV = Mock < NES	0.10258	-0.377683	-1.20319	16.6958	17.8588	7.59169	19.2865	18.9159	16.5653	21.9154	47.6917	27.4734
AT1G06170	TCV < Mock < NES	3.07132e-11	-6.12044	-4.88383	0.982109	0	0	19.2865	21.2804	29.8176	9.64276	6.05609	14.153
AT1G06180	TCV < Mock < NES	0	-1.36953	-0.749226	540.16	459.864	614.927	1255.89	1338.3	1578.68	987.068	742.628	984.88
AT1G06190	TCV < Mock = NES	0	-1.33961	-1.61974	1062.64	1131.36	1127.37	2790.87	3065.56	2549.41	3776.46	3626.84	2803.95
AT1G06200	TCV = Mock = NES	0.925351	-0.0716844	0.0672272	1353.35	1098.32	1214.67	1268.37	1324.11	1260.62	1285.99	1129.46	1083.95
AT1G06210	TCV = Mock > NES	1.11022e-16	0.0680448	0.434336	1602.8	1447.46	1552.5	1454.43	1463.62	1472.66	1148.37	1068.14	1189.68
AT1G06220	TCV = Mock < NES	0.000936135	-0.238269	-0.753896	2426.41	2520.4	2708.36	2831.98	3055.86	3142.03	4789.27	4804.36	3315.62
AT1G06225	TCV = Mock = NES	0.899582	7.27298	7.27298	0.982109	2.67882	0.948961	0	0	0	0	0	0
AT1G06230	TCV = NES > Mock	2.69784e-14	0.608879	-0.152888	4495.11	4048.59	4416.47	2870.28	2765.27	2862.49	5141.35	5040.94	4226.74
AT1G06240	TCV = NES < Mock	0.0795684	-0.663111	0.0463117	400.7	861.687	533.316	913.272	969.441	960.79	499.67	562.459	676.845
AT1G06250	TCV > Mock = NES	0.014763	2.93105	3.17964	12.7674	48.2188	14.2344	2.269	5.91123	1.65653	3.50646	2.27103	2.49758
AT1G06260	TCV > Mock = NES	6.0009e-05	5.6293	6.59672	6.87476	50.0047	26.5709	0	0	1.65653	0	0	0.832528
AT1G06270	TCV = Mock < NES	0.000361902	0.221779	-0.780053	141.424	149.121	173.66	129.333	131.229	137.492	288.406	316.431	192.314
AT1G06290	TCV > Mock = NES	2.22045e-16	0.942228	1.03771	4027.92	3378.84	3267.2	1952.95	1770.26	1831.81	1549.46	1581.12	2068.7
AT1G06310	TCV > Mock = NES	0.186891	3.64338	2.56909	1.96422	11.6082	0.948961	1.1345	0	0	0	0.757011	1.66506
AT1G06320	TCV > Mock = NES	0.271973	6.9076	6.9076	0	3.57176	0	0	0	0	0	0	0
AT1G06330	TCV = Mock = NES	0.980936	0	-4.71335	0	0	0	0	0	0	0	0.757011	0
AT1G06340	TCV = Mock = NES	0.70547	6.5834	-0.494933	0	0	2.84688	0	0	0	1.75323	2.27103	0
AT1G06350	TCV < Mock = NES	0.0296394	-2.7388	-1.5635	0	0	18.0303	13.614	63.8413	43.0699	8.76615	28.7664	15.818
AT1G06360	TCV < Mock < NES	0	-7.53244	-3.96435	0	0	47.4481	2227.02	4336.48	2226.38	189.349	286.15	265.576
AT1G06380	TCV < Mock = NES	0.00809021	-0.837063	-1.26966	183.654	183.053	231.547	287.028	475.263	306.459	560.157	585.927	296.38
AT1G06390	TCV < Mock = NES	0	-0.854817	-0.914417	1431.91	1295.81	1384.53	2341.61	2748.25	2347.31	2331.8	2649.22	2769.82
AT1G06400	TCV > Mock > NES	1.11022e-16	1.6904	1.42928	4358.6	4470.79	4116.59	1411.32	1345.87	1254	1709.4	1424.26	1673.38
AT1G06410	TCV > NES > Mock	0	0.306144	0.799646	6367.99	6249.69	6255.55	5126.8	5211.34	4926.53	3452.11	3471.65	3918.71
AT1G06420	TCV > Mock = NES	0.0143538	2.55899	4.13097	114.907	651.846	261.913	45.38	66.2057	62.9483	14.0258	19.6823	24.9758
AT1G06430	TCV = Mock > NES	2.65128e-07	-0.420475	0.617253	9711.09	10176.8	9452.6	13569.7	10766.7	14932	6430.85	4701.8	7994.76
AT1G06440	TCV = NES > Mock	0.00105436	1.44328	0.296919	104.104	156.265	87.3044	53.3215	41.3786	33.1307	88.5381	112.038	82.4202
AT1G06450	TCV > Mock > NES	1.58514e-09	1.41073	0.554627	246.509	261.632	316.953	95.2979	112.313	102.705	213.017	209.692	139.032
AT1G06460	TCV = NES < Mock	0.001018	-0.662729	-0.0464355	1260.05	944.731	776.25	1700.61	1514.46	1504.13	1036.16	849.367	1193.01
AT1G06470	TCV < Mock < NES	0	-1.14651	-0.201861	517.571	544.694	490.613	1183.28	1205.89	1048.59	537.365	589.712	659.018
AT1G06475	TCV < Mock = NES	0.00707866	-1.34461	-0.801977	32.4096	31.2529	36.0605	62.3975	81.5749	109.331	46.4606	44.6637	82.7641
AT1G06490	TCV < Mock < NES	0	-3.90397	-2.68538	23.5706	16.0729	41.7543	429.975	333.393	455.547	166.557	191.524	165.673
AT1G06500	TCV = Mock = NES	0.989999	0.0111481	-0.0360082	203.296	181.267	193.588	192.865	198.617	182.219	202.498	168.814	221.452
AT1G06510	TCV < Mock = NES	1.11022e-16	-1.0325	-0.932134	464.537	443.791	387.176	854.278	998.997	796.793	778.434	816.058	877.484
AT1G06515	TCV = Mock = NES	0.87443	-0.064502	0.202781	488.108	434.862	481.123	392.537	613.585	462.173	352.399	374.721	492.856
AT1G06520	TCV > Mock = NES	0.000280089	3.93023	2.94239	680.601	191.982	406.155	30.6315	28.3739	24.848	41.2009	97.6545	27.4734
AT1G06530	TCV < Mock = NES	0.0744647	-0.451275	-0.346011	1580.16	1371.53	1441.45	1746.88	2362.92	1896.73	2083.68	1900.09	1600.11
AT1G06540	NES < TCV < Mock	1.11022e-16	-1.72643	1.29097	40.3185	53.6005	25.6447	143.198	164.721	87.7963	17.5682	12.122	19.1548
AT1G06550	TCV < Mock = NES	0	-2.0791	-2.01623	745.42	498.261	819.903	2871.42	3136.5	2711.75	2757.83	2875.13	2714.87
AT1G06560	Mock < TCV < NES	5.38579e-08	0.403788	-0.512749	344.72	380.393	458.348	274.549	316.842	303.146	632.916	567.758	487.861
AT1G06570	TCV > NES > Mock	0	0.83736	2.0313	6576.2	5420.15	5308.49	3161.85	2953.25	3569.83	1585.8	1125.68	1521.86
AT1G06580	TCV = Mock = NES	0.999565	0.146862	-0.0104263	132.585	153.586	156.579	141.812	120.589	137.492	163.927	152.159	129.874
AT1G06590	TCV = NES > Mock	0.0390981	0.504512	-0.0932111	308.382	318.78	324.545	200.806	211.622	258.419	369.931	391.375	253.921
AT1G06620	TCV > Mock > NES	0	4.07447	1.90344	1219.78	1009.02	868.3	116.853	27.1916	39.7568	182.336	347.468	298.045
AT1G06630	TCV = NES > Mock	4.71845e-14	0.772763	0.163565	829.899	702.826	758.702	467.414	397.179	476.557	728.467	695.455	621.898
AT1G06640	TCV = Mock = NES	0.862145	-0.418264	-0.463692	2815.95	1980.53	4107.1	5244.79	2934.33	3718.92	3400.39	4584.91	4293.34
AT1G06645	TCV > Mock = NES	1.11022e-16	1.7222	1.75382	1125.5	1287.62	896.768	412.958	275.463	314.742	301.555	270.253	409.604
AT1G06650	TCV > Mock = NES	0	1.07059	1.25398	5057.61	5413.91	4109.95	2619.56	2028.73	2294.3	2034.62	1757.32	2321.92
AT1G06660	TCV = Mock = NES	0.929717	0.418073	0.361847	36.338	57.1482	39.8564	39.7075	31.9206	28.1611	29.8049	34.8225	39.1288
AT1G06670	TCV = Mock = NES	0.647083	-0.246554	-0.3878	1963.23	1775.17	1892.23	2031.89	2102.03	2546.09	2832.34	2654.08	1880.68
AT1G06680	TCV < Mock < NES	0	-2.36817	-0.511258	21904.9	18828.5	19325.6	95642.8	110266	104168	31921.9	25820.1	27859.7
AT1G06690	TCV = NES < Mock	-2.22045e-16	-1.13368	0.0653273	1068.53	988.485	1208.03	2241.77	2149.32	2773.04	1066.84	853.152	1200.5
AT1G06700	TCV = NES > Mock	9.4369e-15	0.536862	-0.0327459	2960.08	2550.24	2754.83	1780.03	2124.49	1792.37	2735.91	2925.85	2793.13
AT1G06710	Mock < TCV < NES	0.000734377	0.650803	-1.19804	208.207	320.566	280.893	183.789	143.052	188.845	790.707	688.123	378.8
AT1G06720	TCV = Mock < NES	0.0189897	-0.733087	-2.20424	642.299	476.83	786.689	962.055	1120.77	1085.03	3688.79	3766.89	1327.05
AT1G06730	TCV < Mock < NES	0	-1.00075	-0.734628	353.559	309.85	386.227	713.6	792.104	594.696	568.046	587.441	591.095
AT1G06740	TCV = Mock = NES	0.873462	-0.0439258	0.199458	196.422	133.048	222.057	186.058	165.514	217.006	172.693	154.43	153.185
AT1G06750	TCV > Mock = NES	3.92308e-06	2.36247	2.71691	22.5885	56.2552	35.1116	7.94149	5.91123	8.28267	7.01292	5.29908	4.99517
AT1G06760	TCV > Mock = NES	0	1.61726	1.55843	4843.76	4528.1	3682.92	1843.56	1119.59	1292.1	1811.96	1130.97	1489.39
AT1G06770	TCV < Mock = NES	5.44774e-07	-0.517066	-0.319255	343.738	320.566	317.902	483.297	471.716	450.577	428.665	441.338	355.489
AT1G06780	TCV > Mock > NES	2.17604e-14	0.761813	0.259091	909.432	834.006	757.271	525.273	457.529	491.991	745.999	685.095	658.529
AT1G06790	TCV = Mock = NES	0.799446	0.197745	-0.143329	252.402	384.857	363.452	257.531	341.669	273.328	383.957	389.104	332.178
AT1G06800	TCV > Mock = NES	8.49492e-08	1.23844	1.37665	394.808	697.386	607.335	245.052	215.169	260.076	212.141	222.561	219.787
AT1G06810	TCV > Mock = NES	3.94459e-05	4.23666	5.06172	17.678	80.3646	39.8564	1.1345	1.18225	4.9696	1.75323	1.51402	0.832528
AT1G06820	TCV < Mock = NES	0	-0.892731	-0.790215	1158.89	1245.65	1104.59	2174.83	2026.37	2314.18	2031.99	2082.54	1953.94
AT1G06830	TCV < Mock < NES	0	-4.46988	-1.87442	22.5885	32.1459	9.48961	537.753	475.263	410.821	49.967	67.374	118.219
AT1G06840	TCV = Mock = NES	0.665085	-0.234385	-0.527516	662.923	589.341	725.955	769.19	666.786	891.216	1210.61	984.872	656.032
AT1G06850	TCV < Mock < NES	1.11022e-16	-2.0343	-0.909472	103.121	48.2188	126.212	391.402	362.949	382.66	140.258	177.141	203.969
AT1G06870	TCV > Mock = NES	1.95103e-05	0.272996	0.22133	765.063	772.393	810.413	614.899	698.707	629.483	634.669	669.955	709.313
AT1G06890	TCV = NES > Mock	0	0.586986	-0.0446138	2036.89	1903.75	2000.41	1250.22	1363.13	1341.79	1891.73	2086.32	2149.59
AT1G06900	TCV < Mock = NES	0	-1.35735	-1.66653	938.896	809.004	1041.01	2275.81	2424.79	2445.05	3161.07	3392.92	2299.44
AT1G06910	TCV = Mock = NES	0.999411	0.0871558	0.138281	288.74	254.488	276.148	267.742	268.37	235.228	243.699	254.356	246.428
AT1G06920	TCV = Mock = NES	0.981639	5.98872	5.98872	0.982109	0.89294	0	0	0	0	0	0	0
AT1G06925	TCV = Mock = NES	0.509489	5.9634	-0.708105	0	0.89294	0.948961	0	0	0	0	3.02805	0
AT1G06950	TCV < Mock < NES	0	-1.15482	-0.621245	2225.46	2079.66	2537.52	4919.19	5373.31	4943.1	3804.51	3848.65	2872.22
AT1G06960	TCV < Mock = NES	5.55112e-16	-0.767981	-0.792687	292.668	246.452	300.821	467.414	552.109	410.821	518.956	472.375	463.718
AT1G06970	TCV > Mock = NES	0.00359849	4.08504	4.24829	27.499	145.549	47.4481	1.1345	3.54674	8.28267	4.38307	3.02805	4.16264
AT1G06980	TCV < Mock = NES	1.3665e-09	-3.42352	-3.10996	5.89265	8.03646	14.2344	74.8769	68.5702	159.027	112.207	62.0749	69.0998
AT1G07000	TCV > Mock > NES	0	2.72421	1.41846	7269.57	6424.71	5714.64	1072.1	793.287	1071.78	2328.29	2010.62	2922.17
AT1G07010	TCV < Mock < NES	1.11022e-16	-1.26658	-0.656941	3373.54	3761.06	2942.73	8121.88	7865.48	8257.83	5381.54	4752.52	5755.26
AT1G07020	TCV > Mock = NES	0	1.38837	1.53815	494.983	485.76	470.685	190.596	166.697	197.128	164.804	172.599	162.343
AT1G07025	TCV > Mock = NES	3.67445e-07	12.4348	12.4348	20.6243	101.795	43.6522	0	0	0	0	0	0
AT1G07030	Mock < TCV < NES	0	0.640062	-0.185067	774.884	819.719	739.241	473.086	506.001	518.495	859.959	934.152	859.168
AT1G07040	TCV > Mock = NES	0	2.76047	2.2469	2691.96	2072.51	2127.57	414.092	276.645	326.337	477.755	365.636	608.578
AT1G07050	TCV < Mock < NES	8.64063e-11	-2.28933	-1.54269	9.82109	13.3941	10.4386	55.5905	70.9347	38.1003	33.3114	26.4954	38.2963
AT1G07060	TCV = Mock = NES	0.997086	1.18837	-0.371186	0.982109	2.67882	2.84688	0	1.18225	1.65653	3.50646	0.757011	4.16264
AT1G07070	TCV < Mock = NES	2.62886e-07	-1.96928	-1.59707	86.4255	75.007	111.028	262.069	491.814	313.085	311.198	322.487	190.649
AT1G07080	TCV > Mock = NES	3.21965e-15	0.506417	0.619292	3213.46	2907.41	2708.34	1962.68	1976.71	2276.08	1967.12	1760.05	2020.54
AT1G07090	TCV > Mock = NES	0	1.66536	2.12356	455.698	452.721	351.116	136.14	113.496	147.432	78.8953	88.5703	121.549
AT1G07110	TCV < Mock < NES	0	-1.12012	-0.543813	2961.05	2333.25	2553.65	5663.42	5892.31	5503.01	3961.42	3754.78	3724.73
AT1G07120	TCV < Mock = NES	1.59583e-07	-1.93502	-1.75268	9.82109	10.7153	6.64273	29.497	33.1029	41.4134	31.5581	40.1216	19.9807
AT1G07130	TCV > Mock = NES	1.11022e-16	1.61992	1.79492	140.442	128.583	130.957	38.573	48.4721	43.0699	38.5711	40.8786	35.7987
AT1G07135	TCV = NES < Mock	4.45532e-13	-1.30747	0.156111	3604.34	1621.58	2441.68	6826.28	6802.64	5348.95	2642.12	2463.31	1775.78
AT1G07140	Mock < TCV < NES	0	0.601739	-0.311826	5086.34	5594.27	5183.23	3100.59	4059.83	3293.19	6271.3	6536.79	6883.34
AT1G07150	TCV > Mock = NES	0.000309046	2.27278	2.0738	783.723	343.782	426.084	128.198	92.2151	101.049	200.745	65.86	102.401
AT1G07160	Mock < TCV < NES	0.157534	1.65847	-4.62769	10.8032	5.35764	5.69377	4.538	2.36449	0	460.223	49.9627	30.8035
AT1G07170	TCV = NES > Mock	1.11022e-16	1.39853	-0.213662	657.031	688.457	569.377	224.631	289.65	212.036	722.331	829.684	668.52
AT1G07180	TCV < Mock < NES	0	-3.29122	-2.07372	964.431	1135.82	951.808	9373.23	10103.5	10401.4	5119.43	3991.72	3737.22
AT1G07190	TCV = Mock = NES	0.979381	4.9432	4.9432	0	0.89294	0	0	0	0	0	0	0
AT1G07200	TCV < NES < Mock	1.11022e-16	-0.925814	-1.47732	1171.66	967.054	930.931	2162.36	1953.07	1716.17	2679.81	2776.72	3090.34
AT1G07210	TCV = Mock < NES	1.48026e-12	-0.121129	-0.690377	724.796	610.771	826.545	778.266	864.221	708.997	1076.48	1177.91	1234.64
AT1G07220	TCV > Mock > NES	0	1.35586	0.229944	1636.19	1538.54	1405.41	568.384	598.216	622.857	1207.98	1235.44	1461.92
AT1G07230	TCV > NES > Mock	0	0.398596	1.06819	1761.9	1643.9	1522.13	1364.8	1210.62	1162.89	762.655	651.787	935.761
AT1G07240	TCV > Mock = NES	6.08134e-08	1.22318	1.50974	691.404	444.684	471.634	266.607	186.795	235.228	233.18	199.851	131.539
AT1G07250	TCV < Mock = NES	0.00310447	-0.375703	-0.498628	1118.62	1063.49	943.267	1418.12	1111.31	1525.67	1527.06	1295.25	1593.46
AT1G07260	TCV = Mock = NES	0.955712	0.0218772	0.129388	9.82109	20.5376	24.673	15.883	20.0982	18.2219	17.5323	21.9533	10.8229
AT1G07270	TCV < Mock < NES	1.49067e-10	-2.58657	-1.91771	6.87476	6.25058	6.64273	40.842	53.201	24.848	25.4218	22.7088	26.6409
AT1G07280	TCV = Mock > NES	3.44271e-08	0.524912	1.55742	2490.63	2675.25	1671.12	1638.22	1220.08	1893.42	704.798	604.095	1014.02
AT1G07290	Mock < TCV < NES	8.27056e-08	0.876023	-0.466	72.676	85.7223	62.6314	44.2455	33.1029	43.0699	113.96	109.767	81.5877
AT1G07300	TCV > Mock = NES	0.000401414	1.14403	1.42878	243.563	427.718	231.547	145.216	115.86	147.432	120.973	96.1404	118.219
AT1G07310	TCV > NES > Mock	0	1.81255	2.25676	2049.66	1864.46	1793.54	551.367	470.534	602.979	396.23	370.936	427.087
AT1G07320	TCV < Mock < NES	0	-2.72879	-1.82027	1990.73	1406.38	1980.48	10496.4	14760.3	10391.4	6331.79	6762.38	5896.79
AT1G07330	NES < TCV < Mock	0.107283	-0.54095	1.42135	2.94633	39.2894	16.1323	38.573	24.8272	21.535	7.01292	10.5982	4.16264
AT1G07340	TCV = Mock = NES	0.990826	4.9432	0.0976668	0	0.89294	0	0	0	0	0	0	0.832528
AT1G07350	TCV = Mock > NES	9.61265e-10	0.054714	0.99599	3113.28	3032.43	3175.22	2251.98	3266.54	3455.53	1485.86	1211.98	1975.59
AT1G07360	TCV > Mock > NES	3.10699e-05	0.636618	0.265317	1833.6	1715.34	1678.71	1151.52	1132.59	1078.4	1655.93	1482.23	1211.33
AT1G07370	TCV < Mock < NES	0	-3.30293	-1.80075	18.6601	41.9682	34.1626	277.952	354.674	303.146	87.6615	96.1404	146.525
AT1G07380	TCV > Mock > NES	1.11022e-16	1.50541	0.501985	944.788	901.87	729.751	299.508	268.37	339.59	615.384	633.618	570.281
AT1G07390	TCV = NES > Mock	1.33221e-05	0.600205	0.173893	335.881	309.85	317.902	216.689	157.239	261.733	298.926	275.552	279.729
AT1G07400	TCV = Mock = NES	0.609385	-0.687425	0.418234	123.746	90.187	119.569	81.6839	165.514	289.894	66.6227	60.5609	122.382
AT1G07410	TCV = NES < Mock	0.0195859	-0.603958	0.0262959	58.9265	58.9341	55.9887	82.8184	96.9441	84.4833	41.2009	53.7478	75.76
AT1G07420	TCV = Mock = NES	0.926626	0.0863338	0.0057044	474.358	434.862	424.186	414.092	440.978	400.881	364.672	389.861	573.611
AT1G07430	TCV > Mock > NES	1.11022e-16	4.90078	1.07744	719.886	865.259	630.11	26.0935	8.27572	39.7568	568.923	246.029	234.773
AT1G07440	TCV < NES < Mock	8.7912e-09	-0.345896	-0.833903	1746.19	1456.39	1157.73	2009.2	1620.86	1911.64	2870.04	2458.77	2443.47
AT1G07450	TCV < Mock < NES	1.11022e-16	-5.30383	-4.39523	4.91054	1.78588	10.4386	332.408	166.697	178.906	128.862	116.58	115.721
AT1G07460	TCV = Mock = NES	0.980904	5.02822	5.02822	0	0	0.948961	0	0	0	0	0	0
AT1G07470	TCV > Mock > NES	1.11022e-16	1.68476	0.45716	2266.88	2400.33	2213.92	735.688	748.256	656.44	1552.41	1540.16	1919.76
AT1G07473	TCV > Mock = NES	2.91264e-05	5.9508	6.35343	18.6601	88.4011	35.1116	2.269	0	0	0.876615	0	0.832528
AT1G07476	TCV > Mock = NES	1.78868e-06	10.9424	6.22904	6.87476	31.2529	20.8771	0	0	0	0	0.757011	0
AT1G07480	TCV > Mock > NES	0	1.52776	0.498133	1792.17	1796.49	1769.82	606.425	603.05	648.909	1300.97	1169.18	1323.77
AT1G07485	TCV < Mock = NES	0	-2.78217	-2.8611	6.87476	4.4647	11.3875	45.5558	62.659	48.2979	42.9541	52.9908	69.3704
AT1G07490	TCV < Mock < NES	0	-5.35741	-4.29827	3.92843	2.67882	11.3875	235.8	256.547	246.565	112.207	104.468	137.929
AT1G07500	TCV > Mock > NES	2.78994e-09	3.11268	1.83507	121.781	225.914	144.242	26.0935	14.1869	16.5653	51.7203	37.8506	48.2866
AT1G07510	TCV > Mock = NES	2.56271e-06	0.386412	0.734324	3029.8	2967.24	3059.17	2594.29	1683.52	2650.46	1908.71	1576.11	1958.85
AT1G07520	Mock < TCV < NES	5.7655e-12	0.838326	-2.28668	605.961	605.414	539.296	400.789	321.571	256.763	3470.19	3161.26	1910.74
AT1G07530	TCV > Mock > NES	0	1.95954	0.584865	4281.01	4448.63	3935.34	1126.56	980.081	1149.64	3083.05	2869.07	2491.75
AT1G07540	TCV = Mock = NES	0.995698	2.45067	0.0500966	1.96422	1.78588	2.84688	0	1.18225	0	1.75323	3.78506	0.832528
AT1G07550	TCV > Mock = NES	2.12038e-05	9.2253	9.2253	6.87476	5.35764	5.69377	0	0	0	0	0	0
AT1G07560	TCV = Mock = NES	0.984232	0	-4.91746	0	0	0	0	0	0	0.876615	0	0
AT1G07570	TCV = NES < Mock	0	-1.88177	-0.142871	373.201	478.616	422.288	1613.26	1525.1	1557.14	435.678	497.356	473.708
AT1G07590	TCV > Mock = NES	0	2.49466	2.90752	72467.1	62923	52338.9	14545.2	8698.95	10065.1	7360.88	6706.21	10952.6
AT1G07600	TCV > Mock > NES	0	16.8337	6.54546	1310.49	1213.03	980.571	0	0	0	0	8.23704	29.2475
AT1G07610	TCV > NES > Mock	0.000350576	1.39635	2.75466	314.283	247.344	104.386	141.812	53.201	57.9787	36.8178	31.0375	30.8035
AT1G07615	TCV = Mock = NES	0.558995	2.38804	1.22291	228.831	1202.79	409.951	121.391	111.131	119.271	295.419	302.048	191.481
AT1G07620	TCV > Mock = NES	0	1.8285	1.49884	2071.27	2207.35	1712.88	732.886	148.963	805.076	717.948	658.6	743.447
AT1G07630	TCV > Mock > NES	0	1.18222	0.841786	3381.4	3174.4	2817.47	1452.16	1144.41	1533.95	1904.01	1803.96	1521.86
AT1G07640	TCV > NES > Mock	0	0.283301	1.0441	1507.54	1182.25	1268.76	1068.7	1067.57	1116.5	595.221	551.861	772.586
AT1G07645	TCV = Mock = NES	0.993233	-5.81296	-4.71335	0	0	0	0	0	1.65653	0	0.757011	0
AT1G07650	TCV = NES < Mock	0.154895	-0.463524	0.288499	4669.93	2644.89	4373.76	4684.35	5125.03	6308.08	3018.18	3222.6	3329.28
AT1G07660	TCV = NES < Mock	0.165073	-0.233647	0.224902	728.967	552.735	677.056	717.643	914.816	670.661	531.806	560.412	583.795
AT1G07670	TCV > Mock > NES	1.11022e-16	1.50458	0.900942	4027.84	3746.98	4206.83	1395.97	1316.64	1510.1	2001.46	1937.68	2477.46
AT1G07690	TCV = Mock = NES	0.610047	6.92986	6.92986	0	2.67882	0.948961	0	0	0	0	0	0
AT1G07700	NES < TCV < Mock	0	-0.655552	0.318025	2100.73	2280.57	1901.72	3359.25	3354.03	3183.86	1547.23	1557.17	1935.63
AT1G07705	TCV > Mock = NES	0.000910871	0.853401	0.75161	1118.62	1749.27	1193.79	808.898	740.086	699.058	764.408	805.46	842.518
AT1G07710	TCV = NES < Mock	3.4521e-05	-2.0609	0.9447	1.96422	8.9294	0	13.614	15.3692	16.5653	0.876615	2.27103	2.49758
AT1G07720	TCV < Mock < NES	0	-1.89795	-0.670201	1753.06	1910.89	2325.9	6467.78	7756.71	8098.8	3410.91	3071.19	3049.55
AT1G07725	TCV > Mock = NES	0.000119115	3.46142	3.24911	46.1591	143.763	69.2742	9.07599	9.45796	4.9696	8.76615	6.8131	11.6554
AT1G07730	TCV > Mock = NES	0.208946	2.57939	8.242	0	9.05263	0	0	1.48963	0	0	0	0
AT1G07740	TCV = NES > Mock	3.18313e-09	1.59752	-0.291163	192.493	384.734	272.352	111.181	80.0853	89.4529	362.042	368.665	308.868
AT1G07745	TCV = Mock < NES	8.55985e-05	0.265521	-0.337819	187.583	172.337	170.813	136.14	167.879	137.492	234.933	221.047	214.792
AT1G07750	TCV > Mock > NES	0	1.69572	0.722433	1603.78	1615.33	1719.52	452.665	445.707	626.17	975.672	915.227	1102.27
AT1G07770	TCV < Mock = NES	2.23932e-07	-0.909771	-1.04587	3668.18	2650.25	3926.8	5416.1	8105.47	5726.64	7257.41	7876.7	6018.34
AT1G07780	TCV < Mock = NES	6.42946e-10	-1.6668	-2.36676	133.6	112.757	145.485	347.972	465.387	430.846	800.042	792.5	428.635
AT1G07790	TCV > NES > Mock	9.44669e-08	0.250329	0.634763	689.44	575.947	700.333	509.39	623.043	520.152	459.346	409.543	397.116
AT1G07795	TCV > Mock = NES	0.015997	9.87952	5.16617	2.94633	20.5376	4.74481	0	0	0	0	0.757011	0
AT1G07810	TCV > Mock > NES	0	2.23345	0.53612	5056.66	4477.89	4695.37	1025.05	887.066	1113.85	3074.14	3194.1	3545.04
AT1G07820	TCV = NES < Mock	1.48424e-05	-0.343235	0.0930906	828.657	690.238	747.335	929.649	1073.72	871.573	702.467	694.713	727.436
AT1G07830	TCV = NES > Mock	5.54059e-05	0.688471	-0.192484	294.633	283.062	362.503	170.175	245.907	167.31	405.873	358.823	309.7
AT1G07840	TCV < Mock = NES	0.120745	-0.364105	-0.660279	660.959	515.227	644.345	651.203	906.782	785.198	1079.11	1095.4	702.653
AT1G07850	TCV > Mock = NES	1.24161e-06	8.41395	9.85797	90.354	541.122	168.915	1.1345	1.18225	0	0	0	0.832528
AT1G07860	TCV > Mock = NES	0.0449878	10.6141	4.79389	1.02041	39.6787	6.29161	0	0	0	0	0	1.66506
AT1G07870	TCV > Mock = NES	0	1.33886	1.12455	1024.3	887.193	907.558	393.671	346.398	374.377	397.106	433.767	462.053
AT1G07880	TCV < Mock = NES	-2.22045e-16	-2.46292	-2.33563	24.5527	32.1459	38.9074	183.789	192.706	150.745	148.148	184.711	149.855
AT1G07885	TCV = NES < Mock	0.235047	-2.1399	-0.0725955	0	0.89294	3.79585	6.80699	2.36449	11.5957	1.75323	1.51402	1.66506
AT1G07890	TCV = Mock > NES	1.44562e-12	0.159575	1.1637	20002.6	16356.9	18944.1	15830.8	14308.7	19373.2	7385.48	6214.31	11085.9
AT1G07900	TCV = NES > Mock	2.12053e-14	2.16936	0.453649	1073.44	960.804	706.027	240.514	55.5655	313.085	707.428	570.03	723.466
AT1G07901	TCV = Mock = NES	0.992545	0.693653	2.35553	0.982109	2.67882	0.948961	0	1.18225	1.65653	0.876615	0	0
AT1G07902	TCV > Mock > NES	0.00641937	1.64577	0.634262	45.177	76.7929	39.8564	19.2865	14.1869	18.2219	35.0646	40.8786	28.3059
AT1G07910	TCV = Mock = NES	0.556123	1.3617	1.11231	1000.77	3127.08	1395.92	622.84	625.408	901.155	895.9	877.376	781.743
AT1G07920	TCV > Mock > NES	1.11022e-16	1.32053	0.317428	21601.6	21618.5	20793.4	7575.39	8679.58	9375.27	19383.4	18038.1	13949.2
AT1G07930	TCV = NES > Mock	0.000629821	0.540215	-0.247173	9836.5	10439.1	10828.4	6011.08	7934.97	7443.19	13529.7	13504.9	9882.19
AT1G07940	TCV = NES > Mock	1.95832e-12	1.11529	0.114998	15501.6	16676	15994.5	6444.25	7284.37	8507.48	17155.7	15435.7	11889.9
AT1G07950	Mock < TCV < NES	0	0.456302	-0.284977	466.502	428.611	467.838	330.139	378.319	284.924	548.761	563.216	548.636
AT1G07960	Mock < TCV < NES	1.92664e-07	0.403841	-0.236677	1280.67	1118.85	1215.62	870.161	969.441	892.872	1308.79	1356.56	1594.29
AT1G07970	Mock < TCV < NES	0	0.587773	-0.525613	471.412	483.974	540.908	317.66	374.772	303.146	776.681	731.273	646.041
AT1G07980	TCV > Mock = NES	1.11022e-16	0.472066	0.644548	535.249	446.47	470.685	342.619	333.393	371.064	317.335	302.048	309.7
AT1G07985	TCV = NES > Mock	0.000376621	2.21102	0.206252	28.4811	18.7517	27.5199	10.2105	5.91123	0	21.0388	28.7664	14.9855
AT1G07990	TCV > Mock = NES	0	1.10736	0.987151	3644.6	3478.9	3182.82	1735.78	1396.23	1651.57	1701.51	1632.87	1864.86
AT1G08000	TCV < Mock < NES	4.9873e-07	-0.620395	-0.246975	250.438	284.848	296.076	410.689	476.434	390.942	363.795	316.431	306.37
AT1G08005	TCV = Mock = NES	0.34319	2.08478	1.31489	2.94633	16.9659	1.89792	2.269	1.19289	1.65653	0.876615	4.54207	3.33011
AT1G08010	TCV = NES < Mock	4.33575e-12	-0.615114	0.0891352	437.038	332.174	464.042	613.764	673.88	601.322	369.055	398.188	392.12
AT1G08030	Mock < TCV < NES	0	0.633429	-0.318705	973.27	997.414	864.504	626.244	601.763	599.666	1270.21	1162.77	1103.1
AT1G08035	TCV = Mock = NES	0.998048	0.266322	-0.517123	4.91054	1.78588	4.74481	4.538	0	4.9696	5.25969	5.29908	5.82769
AT1G08040	TCV = Mock = NES	0.944758	-0.100366	-0.0219598	691.404	1190.29	801.872	1057.35	881.955	937.599	825.771	843.311	1055.64
AT1G08050	TCV > Mock > NES	0	4.42139	1.98539	2568.21	3078.86	2463.5	166.771	104.038	107.675	710.935	589.712	747.61
AT1G08060	TCV > Mock = NES	8.69504e-12	0.621503	0.489963	1785.47	1647.47	1804.92	1168.53	900.871	1335.17	1271.09	1201.38	1257.12
AT1G08065	TCV = Mock = NES	0.981712	5.07626	5.07626	0.982109	0	0	0	0	0	0	0	0
AT1G08070	Mock < TCV < NES	2.22045e-16	0.73194	-0.864803	61.8728	84.8293	68.3252	37.4385	47.2898	44.7264	120.096	149.131	122.382
AT1G08080	TCV = Mock = NES	0.991183	-5.33658	-4.71335	0	0	0	0	1.18225	0	0	0.757011	0
AT1G08090	TCV = Mock = NES	0.288095	-2.97242	-0.934361	2.94633	0	0	2.269	1.18225	19.8784	2.62984	3.02805	0
AT1G08110	TCV = Mock > NES	0.0183745	-0.0249428	0.271871	3177.12	2609.17	2841.19	2861.21	3019.45	2897.28	2316.89	2202.15	2626.62
AT1G08120	TCV = NES > Mock	0.00540577	5.37683	0.00857962	11.7853	69.6493	18.0303	0	2.36449	0	45.584	41.6356	11.6554
AT1G08125	TCV > Mock > NES	1.11022e-16	0.988706	0.456309	717.921	697.386	670.916	319.929	414.968	316.398	535.612	525.366	459.555
AT1G08130	TCV < Mock = NES	0.213539	-0.488751	-0.377862	773.902	575.054	701.282	895.12	939.885	1041.96	1042.29	950.806	671.017
AT1G08135	TCV = Mock = NES	0.980904	5.02822	5.02822	0	0	0.948961	0	0	0	0	0	0
AT1G08140	TCV = Mock = NES	0.987829	-5.33658	-7.04661	0	0	0	0	1.18225	0	0	2.27103	1.66506
AT1G08150	TCV = Mock = NES	0.97443	7.53286	1.73964	0	2.67882	2.84688	0	0	0	0.876615	0.757011	0
AT1G08160	TCV < Mock < NES	0	-2.67682	-1.57708	47.1412	19.6447	43.6522	232.572	268.37	205.41	102.564	127.935	99.0708
AT1G08165	TCV = NES < Mock	0	-2.45336	-0.527	20.6243	10.7153	18.0303	102.105	83.9394	84.4833	27.1751	18.1683	25.8084
AT1G08170	TCV = Mock = NES	0.99622	-0.630303	0.983156	1.96422	0.89294	1.89792	4.538	1.18225	1.65653	0.876615	1.51402	0
AT1G08180	TCV > Mock = NES	-2.22045e-16	1.23846	1.35851	266.151	238.415	249.577	132.736	95.7619	91.1094	78.8953	87.8133	127.377
AT1G08190	NES < TCV < Mock	0	-0.590924	0.295924	2731.24	3025.28	2738.7	4027.47	4091.75	4676.4	2170.5	2139.31	2609.97
AT1G08200	TCV < Mock < NES	0	-1.88996	-0.786537	3494.34	3042.25	3992.28	13956.6	13198.6	11867.4	5485.86	5953.89	6721.83
AT1G08210	Mock < TCV < NES	1.11022e-16	0.762247	-0.675969	572.569	505.404	589.305	335.812	360.585	286.581	860.836	979.573	823.37
AT1G08220	TCV = Mock < NES	0.00830833	0.100653	-0.988208	190.529	173.23	182.201	153.157	173.79	182.219	457.593	398.188	227.28
AT1G08230	TCV = NES > Mock	0.0181365	0.740709	0.121848	1212.9	834.899	1004.95	596.747	501.272	728.875	1052.81	999.255	753.437
AT1G08250	NES < TCV < Mock	1.11022e-16	-0.363055	1.11499	457.663	448.157	425.945	579.301	462.258	671.294	211.264	177.141	226.447
AT1G08260	TCV < Mock = NES	0	-1.23799	-1.41147	238.652	284.054	369.284	678.858	625.408	799.709	823.141	831.198	718.471
AT1G08270	TCV = Mock = NES	0.500753	0.604175	-0.199855	63.8371	61.6129	57.8866	45.38	43.7431	31.4742	81.5252	66.617	62.4396
AT1G08280	TCV < Mock < NES	0	-2.56624	-2.23512	88.3898	86.6152	140.446	562.712	667.969	637.766	491.781	556.403	437.077
AT1G08290	TCV = Mock = NES	0.406965	0.101748	0.404747	210.171	158.943	201.18	196.268	167.879	167.31	114.837	146.103	169.836
AT1G08300	TCV < Mock = NES	1.78698e-05	-1.53762	-1.39958	62.8549	44.647	98.692	200.806	213.986	183.875	252.465	181.683	109.894
AT1G08310	TCV > Mock = NES	0	3.44613	2.98624	123.746	108.046	101.539	10.2105	7.09347	13.2523	9.64276	17.4113	14.9855
AT1G08315	TCV > NES > Mock	1.11022e-16	2.37772	3.00807	513.643	419.682	371.044	83.9529	87.4862	79.5137	61.363	49.9627	50.7842
AT1G08320	TCV > Mock > NES	8.13901e-10	12.0339	3.26017	59.9086	24.1094	41.7543	0	0	0	6.1363	5.29908	1.66506
AT1G08340	TCV < Mock < NES	0	-2.16325	-0.906296	15.7137	18.7517	33.2136	111.181	99.3086	92.766	39.4477	41.6356	45.789
AT1G08350	TCV < NES < Mock	0	-0.46241	-1.4538	280.883	216.092	294.178	332.408	353.491	404.195	688.143	729.002	750.107
AT1G08360	TCV < Mock = NES	1.26035e-09	-0.633762	-1.04549	5051.97	4186.1	5325.57	6678.8	8851.47	7066.78	10573.7	11053.9	8432.67
AT1G08370	TCV > Mock = NES	0	0.91564	0.994761	1951.45	2250.21	1959.61	1110.67	1052.2	1103.25	1090.51	1002.28	999.033
AT1G08380	TCV = NES < Mock	0	-2.21724	0.0532373	10673.6	8466.86	8376.48	40313.3	44081.2	43560.2	9497.24	7418.71	9604.04
AT1G08390	TCV < Mock = NES	0.00015465	-0.837273	-0.620408	59.3292	46.4329	55.9887	106.643	94.5796	87.7963	68.376	95.3834	84.9178
AT1G08400	TCV = NES > Mock	2.77379e-11	0.759833	-0.0279991	388.512	359.855	355.86	207.613	200.982	243.511	416.392	390.618	318.858
AT1G08410	TCV = Mock < NES	0.249122	-0.339551	-1.08375	600.068	600.056	706.976	690.91	905.6	816.672	1756.74	1542.03	743.447
AT1G08420	TCV > Mock = NES	1.11022e-16	0.656194	0.798306	3894.06	4018.23	3613.64	2296.23	2370.4	2647.14	2222.68	2118.87	2286.12
AT1G08430	TCV > Mock = NES	0.00248331	3.5941	5.08383	22.5885	158.05	63.5804	3.4035	11.8225	4.9696	2.62984	4.54207	0
AT1G08440	TCV < Mock = NES	0.0993375	-3.24495	-3.32674	0	0	1.89792	15.883	2.36449	0	1.75323	7.57011	9.99033
AT1G08450	TCV > Mock > NES	-2.22045e-16	2.8689	0.6148	17814.5	15514.8	14367.3	2275.81	1826.57	2426.82	8625.01	8726.83	13795
AT1G08460	TCV > Mock > NES	0	2.22216	1.17269	1473.16	1549.25	1275.4	329.005	295.561	296.52	675.87	541.263	689.333
AT1G08465	TCV = Mock > NES	0.00185339	-0.214781	0.348394	582.39	457.185	584.56	581.998	708.165	594.696	377.821	429.982	467.88
AT1G08470	TCV < Mock < NES	0	-1.38963	-0.392261	286.776	358.069	309.361	888.313	780.282	831.58	365.548	407.272	479.536
AT1G08480	TCV > Mock = NES	9.47546e-07	0.399978	0.392253	1717.71	1609.97	1617.03	1199.17	1348.94	1199.33	1222.88	1121.89	1422.79
AT1G08490	TCV < NES < Mock	0	-0.227018	-0.602465	1800.2	2110.02	1779.3	2183.91	2318.38	2156.81	2785.01	2912.98	2940.49
AT1G08500	TCV < Mock = NES	0.00144845	-0.90682	-1.58544	6.87476	12.5012	18.9792	21.5555	27.1916	23.1915	26.2984	52.2338	36.6312
AT1G08510	NES < TCV < Mock	0	-0.874615	0.469005	2899.18	2582.38	2978.79	4777.38	5279.91	5454.97	1918.91	1753.24	2440.14
AT1G08520	TCV < Mock < NES	0	-1.73355	-0.473679	2889.36	3356.56	3352.68	9857.66	11461.9	10600.2	4254.21	4503.46	4571.41
AT1G08530	TCV = Mock = NES	0.900364	-0.152537	0.238225	304.454	694.708	371.044	525.273	519.006	478.739	297.172	339.141	525.325
AT1G08540	TCV < Mock < NES	0	-1.85932	-0.39817	976.216	1569.79	1022.98	4202.18	4725.43	4022.07	1534.95	1445.89	1722.5
AT1G08550	TCV < Mock < NES	2.29952e-09	-0.88115	-0.493085	672.744	900.977	671.865	1521.36	1460.07	1154.6	1107.16	1064.36	989.043
AT1G08560	TCV < Mock < NES	0	-2.76128	-2.02964	54.016	76.7929	71.1721	488.969	492.996	387.629	241.946	324.758	258.084
AT1G08570	TCV = Mock > NES	1.11022e-16	0.270537	1.08813	5204.19	6223.79	5299.95	4718.38	5099.02	4050.23	2555.33	2439.09	2873.89
AT1G08580	TCV < Mock = NES	0.00103264	-1.03387	-1.41561	575.516	460.757	669.018	1024.45	1534.55	932.629	1896.12	1694.95	958.239
AT1G08590	TCV = Mock = NES	0.99794	0.0948538	-0.627029	6.87476	8.03646	0.948961	6.80699	4.72898	3.31307	8.76615	9.08414	6.66022
AT1G08600	TCV > Mock > NES	2.11053e-13	0.862185	0.494185	2344.29	2317.18	2057.35	1215.05	1041.56	1439.53	1660.31	1716.14	1393.65
AT1G08610	TCV < Mock = NES	9.22613e-09	-1.63736	-2.30991	137.495	65.1846	133.804	324.467	404.328	318.055	670.61	653.301	344.666
AT1G08620	TCV = NES > Mock	0	0.56621	-0.035164	2630.09	2862.77	2571.69	1873.06	1675.24	1898.39	2881.43	2822.9	2559.19
AT1G08630	TCV > Mock > NES	9.06375e-12	5.00501	2.23023	167.941	364.32	282.79	10.2105	3.54674	11.5957	34.188	45.4207	94.0756
AT1G08640	TCV < Mock < NES	0	-1.25077	-0.801675	1723.6	1579.61	1439.57	3646.28	4293.92	3346.2	2888.45	2872.1	2506.74
AT1G08645	TCV = Mock = NES	0.981639	5.98872	5.98872	0.982109	0.89294	0	0	0	0	0	0	0
AT1G08650	TCV < Mock = NES	8.27089e-05	-1.18784	-1.64214	560.784	572.375	614.927	1247.95	1727.26	1007.17	1939.07	2338.41	1178.86
AT1G08660	TCV < Mock = NES	0	-0.573611	-0.804102	553.909	423.254	581.713	729.483	833.483	757.036	921.322	953.077	847.513
AT1G08670	TCV = Mock = NES	0.984232	0	-4.91746	0	0	0	0	0	0	0.876615	0	0
AT1G08680	TCV > Mock = NES	7.22511e-08	0.494738	0.472619	1650.92	1342.98	1433.88	1035.8	946.979	1159.57	1132.59	1031.81	1026.51
AT1G08695	TCV = Mock = NES	0.610047	6.92986	6.92986	0	2.67882	0.948961	0	0	0	0	0	0
AT1G08700	TCV = Mock < NES	1.11022e-16	0.0023666	-1.32939	947.735	985.806	904.36	938.231	912.693	982.325	2302.87	2386.1	2442.64
AT1G08710	Mock < TCV < NES	0	1.16888	-0.423641	557.838	574.161	568.428	238.245	269.552	248.48	872.232	743.385	665.19
AT1G08720	TCV > Mock > NES	0	2.49421	1.81728	2964.99	4003.94	3023.39	644.396	509.548	619.544	1007.23	919.012	909.12
AT1G08730	TCV > Mock = NES	0.00276927	3.65975	4.59365	185.619	1135.82	515.286	43.111	50.8366	51.3526	28.0517	28.0094	19.9807
AT1G08750	TCV = Mock = NES	0.998844	-0.0860913	0.0742713	453.734	416.11	426.084	448.127	483.538	443.951	402.366	415.599	412.934
AT1G08760	TCV > Mock = NES	7.05109e-11	0.739056	1.03151	1147.1	1485.85	1097	744.231	748.361	742.128	545.254	585.927	693.495
AT1G08770	TCV > Mock = NES	0	1.63227	1.50581	733.635	687.564	716.466	222.362	226.991	240.198	258.601	246.029	248.093
AT1G08780	TCV > Mock = NES	0.123874	0.282034	0.333835	512.661	436.648	527.622	393.671	484.721	336.277	386.587	407.272	377.968
AT1G08790	TCV = Mock = NES	0.979381	4.9432	4.9432	0	0.89294	0	0	0	0	0	0	0
AT1G08800	TCV > Mock > NES	0	1.63445	0.695328	2560.36	2126.98	2025.08	687.506	631.319	843.176	1459.56	1367.92	1317.89
AT1G08810	TCV < Mock < NES	0	-2.54043	-0.815565	188.565	175.909	134.752	1109.54	902.053	892.872	290.159	226.346	362.149
AT1G08820	TCV > Mock > NES	1.18794e-14	1.18731	0.572201	2560.36	2114.48	2450.22	1137.9	942.25	1048.59	1470.96	1440.59	1880.68
AT1G08830	TCV > Mock = NES	7.70127e-06	0.871334	0.940149	20175.5	13923.6	20031.6	9997.21	9486.34	10106.5	8485.63	8226.44	11499.7
AT1G08840	TCV < Mock < NES	2.5047e-09	-1.3634	-0.871855	100.175	68.7564	83.5086	195.134	217.533	236.884	166.557	184.711	110.726
AT1G08845	TCV = Mock = NES	0.900251	-0.214993	-0.00513652	88.3898	66.9705	92.0492	94.1634	113.496	79.5137	83.2784	98.4115	66.6022
AT1G08860	TCV > Mock > NES	1.67644e-14	7.24869	1.79915	159.102	79.4717	111.028	2.269	0	0	35.9412	46.1777	18.3156
AT1G08880	TCV > Mock = NES	0.0876042	0.407188	0.387474	1303.26	1367.09	1197.59	934.827	1100.67	881.277	1223.75	928.096	805.054
AT1G08890	Mock < TCV < NES	0	2.02941	-0.323333	272.044	244.666	292.28	63.532	48.4721	86.1398	343.633	349.739	318.858
AT1G08900	Mock < TCV < NES	0	0.814868	-0.559593	1406.38	1227.79	1393.08	914.406	578.118	796.793	2131.93	2004.57	1799.09
AT1G08910	TCV = Mock = NES	0.685862	0.237543	0.11535	654.084	717.031	707.925	591.074	579.3	593.039	690.772	687.366	541.143
AT1G08920	TCV > Mock > NES	3.78586e-14	1.43569	0.775737	2013.32	1803.74	2171.22	1092.52	673.88	447.264	1101.03	1195.32	1201.34
AT1G08930	TCV > Mock = NES	1.11022e-16	1.09479	1.2895	7297.07	5963.95	7106.77	3280.97	3154.23	3101.03	3671.26	2581.41	2079.65
AT1G08940	TCV > Mock = NES	0	3.14479	3.54655	751.313	675.063	543.755	63.532	86.3039	72.8875	66.6227	46.1777	55.7793
AT1G08960	TCV = Mock = NES	0.933528	-0.0973717	-0.0623262	340.792	479.509	419.441	445.858	423.244	457.204	390.094	473.132	431.249
AT1G08970	TCV > Mock > NES	0	1.70012	1.17943	1756.99	1764.45	1754.63	537.753	542.651	543.343	818.758	720.675	790.069
AT1G08980	TCV = NES > Mock	0.000151045	1.11798	-0.0656024	1636.19	1574.25	1284.89	722.676	763.731	584.757	1864.56	1750.97	1088.95
AT1G08985	TCV = Mock = NES	0.981712	5.07626	5.07626	0.982109	0	0	0	0	0	0	0	0
AT1G08990	TCV = Mock = NES	0.951393	7.01946	7.01946	1.96422	0	1.89792	0	0	0	0	0	0
AT1G09000	TCV = NES < Mock	0.0121584	-1.06658	-0.40601	23.5706	33.9317	29.4178	73.7424	52.0188	56.3222	23.6686	42.3926	49.1191
AT1G09010	Mock < TCV < NES	1.11022e-16	1.44179	-0.546342	4019.77	4053.95	4555.96	1669.98	1468.35	1510.76	6415.94	6361.17	5667.01
AT1G09020	TCV > NES > Mock	1.11022e-16	0.181305	0.743346	1949.49	1908.21	1849.53	1638.22	1620.86	1774.15	1151	1122.65	1135.57
AT1G09040	TCV = NES > Mock	7.82196e-08	0.812052	-0.214482	394.845	258.82	338.812	228.227	159.653	177.393	391.367	388.765	371.431
AT1G09050	TCV = NES > Mock	0.414653	0.6429	-0.0302415	392.806	195.687	287.502	193.806	153.642	213.549	255.574	281.947	357.03
AT1G09060	TCV > Mock = NES	0	0.717526	0.611106	2972.84	2804.73	2736.8	1745.99	1627.95	1803.97	1945.21	1851.65	1777.45
AT1G09070	TCV > NES > Mock	1.11022e-16	1.31085	2.53437	53029.9	33340.6	38063.8	18606.9	17016.1	14534.4	8213.88	6586	6679.37
AT1G09080	TCV > Mock > NES	1.11022e-16	7.29515	1.43643	1119.6	1594.79	1466.15	3.4035	8.27572	14.9088	255.972	526.88	761.763
AT1G09090	TCV > Mock = NES	1.02213e-07	10.6453	10.6453	8.83898	25.8953	13.2855	0	0	0	0	0	0
AT1G09100	TCV > Mock > NES	1.11022e-16	1.7484	0.530319	1658.78	1999.29	1629.37	563.846	484.721	525.122	1209.73	1165.04	1286.26
AT1G09130	TCV > NES > Mock	0	0.73694	1.13788	6074.34	6267.55	5336.01	3650.82	3575.11	3380.99	2520.27	2252.87	3260.18
AT1G09140	TCV > Mock = NES	0	0.855394	1.09745	4219.14	3453.89	3797.74	1839.02	1989.72	2511.31	1742.71	1470.12	2147.92
AT1G09150	NES < TCV < Mock	2.89302e-12	-0.284007	0.280699	901.576	832.22	841.729	1011.97	1118.4	1005.52	659.214	669.198	791.734
AT1G09155	TCV = Mock = NES	0.895249	-0.342507	0.800553	0	0.89294	1.89792	0	3.54674	0	0	0.757011	0.832528
AT1G09157	TCV > Mock = NES	2.2466e-06	4.42548	11.2641	8.83898	39.2894	25.622	3.4035	0	0	0	0	0
AT1G09160	TCV < Mock < NES	1.11022e-16	-1.81644	-0.585369	538.195	320.566	632.957	1495.27	2097.3	1661.5	731.097	790.32	716.806
AT1G09170	TCV < Mock = NES	2.92417e-09	-3.75071	-3.68046	2.94633	2.67882	20.8771	190.596	88.6684	77.8571	79.7719	93.8694	166.506
AT1G09176	TCV > Mock = NES	0.0645021	1.97088	1.74633	13.7495	6.25058	4.74481	2.269	2.36449	1.65653	1.75323	2.27103	3.33011
AT1G09180	TCV = Mock = NES	0.548477	0.146553	0.44658	212.135	215.199	204.976	267.742	156.056	147.432	163.927	130.206	169.836
AT1G09190	TCV > Mock = NES	0.204252	3.48652	2.12852	213.118	930.444	255.271	36.304	43.7431	44.7264	113.083	121.879	84.9178
AT1G09195	TCV = NES > Mock	0.000250186	1.52334	0.447397	659.977	1142.07	701.282	298.373	266.005	306.459	625.903	581.385	628.558
AT1G09200	TCV = Mock > NES	0.00773108	-0.47564	0.970148	223.921	545.587	241.036	403.882	481.174	520.152	163.927	169.571	182.324
AT1G09210	TCV = Mock = NES	0.506867	0.783941	-0.299614	6372.9	7382.83	7889.66	4101.21	4409.78	4060.17	6374.74	7635.97	12630.8
AT1G09220	TCV > Mock = NES	0.0561454	2.84594	1.61441	86.4255	322.351	143.293	30.6315	21.2804	24.848	67.4993	71.1591	41.6264
AT1G09230	TCV > Mock = NES	0	0.938557	0.819354	1000.77	911.692	810.413	507.121	472.898	440.638	545.254	463.291	534.483
AT1G09240	TCV > Mock = NES	0	6.23135	6.38055	2490.63	2015.37	2032.68	68.0699	2.36449	16.5653	26.2984	19.6823	32.4686
AT1G09250	NES < TCV < Mock	1.11022e-16	-0.823341	0.437125	1033.18	979.556	995.46	1991.05	1720.17	1611.81	881.874	654.815	685.17
AT1G09270	TCV > NES > Mock	1.11022e-16	0.248795	0.627006	2733.21	2512.73	2688.41	2240.64	2265.18	2171.72	1716.41	1632.12	1789.1
AT1G09280	Mock < TCV < NES	8.90399e-14	0.917699	-0.627809	781.758	674.17	660.477	377.788	374.772	367.751	1233.4	1162.77	874.154
AT1G09290	TCV = Mock < NES	3.30972e-06	-0.235269	-0.967776	296.597	223.235	234.393	282.49	295.561	309.772	561.91	534.45	378.8
AT1G09300	TCV = NES > Mock	1.51503e-05	0.951009	-0.0504526	314.275	373.249	338.779	182.654	164.332	183.875	428.665	369.422	264.744
AT1G09310	TCV < Mock < NES	0	-4.83438	-3.15028	1108.8	308.957	3820.52	42214.7	54112.6	53118.4	16012.2	14443	16052
AT1G09320	TCV = NES > Mock	0.077952	1.79945	0.514741	433.11	987.592	559.887	192.865	193.888	182.219	557.527	555.646	273.069
AT1G09330	TCV > Mock = NES	0.438587	0.124476	0.206141	1321.92	1286.73	1140.65	1112.94	1199.98	1126.44	1004.6	1049.97	1195.51
AT1G09340	TCV < Mock < NES	0	-3.46373	-1.31119	3798.8	3201.19	3574.74	37654	41456.6	37558.6	8266.48	8060.66	9913.74
AT1G09350	TCV < Mock < NES	0.057596	-5.09703	-1.01039	0.982109	1.78588	0.948961	111.181	7.09347	9.93921	3.50646	1.51402	2.49758
AT1G09370	TCV = Mock = NES	0.598422	-6.83857	-6.40386	0	0	0	3.4035	0	0	1.75323	0.757011	0
AT1G09380	Mock < TCV < NES	0.125547	8.51866	-1.96841	0.982109	7.14352	2.84688	0	0	0	9.64276	32.5515	0.832528
AT1G09390	NES < TCV < Mock	0.000412225	-0.31892	0.60896	224.903	130.369	185.996	220.093	261.276	193.815	128.862	121.122	104.898
AT1G09400	TCV > Mock > NES	0	6.43255	2.47557	69.7297	79.4717	49.346	2.269	0	0	14.0258	8.32712	13.3204
AT1G09410	Mock < TCV < NES	3.60614e-05	1.23584	-0.577481	50.0875	71.4352	58.8356	35.1695	24.8272	16.5653	111.33	95.3834	62.4396
AT1G09415	TCV < NES < Mock	4.37423e-07	-0.48409	-1.11091	310.346	374.142	297.025	484.431	502.454	385.973	806.486	762.31	551.133
AT1G09420	TCV > Mock > NES	2.33147e-15	4.22244	1.62259	1880.74	1146.54	1130.21	97.5669	80.3927	44.7264	473.372	491.3	385.46
AT1G09430	TCV = NES > Mock	0	0.894992	-0.156271	4954.74	4386.12	3920.16	2400.6	2355.03	2375.47	5149.24	4866.83	4762.06
AT1G09440	TCV < Mock < NES	0	-4.26322	-2.5352	24.5527	28.5741	43.6522	585.402	682.156	591.383	170.94	169.571	220.62
AT1G09450	TCV < Mock < NES	0.000270583	-1.57144	-0.952594	4.91054	39.2894	17.0813	54.456	69.7525	57.9787	35.0646	38.6076	44.9565
AT1G09460	TCV > Mock = NES	0.00620111	2.26875	1.3574	42.2307	54.4694	106.284	11.345	14.1869	16.5653	20.1621	34.0655	24.9758
AT1G09470	TCV < Mock < NES	0	-4.44268	-2.31956	1.96422	8.03646	6.64273	123.66	147.781	91.1094	18.4089	26.4954	38.2963
AT1G09480	TCV > Mock > NES	1.77636e-15	5.05627	3.33996	355.523	189.303	219.21	11.345	8.27572	3.31307	32.4347	19.6823	23.3108
AT1G09483	TCV > Mock = NES	0.449321	7.03169	7.03169	2.94633	0	0.948961	0	0	0	0	0	0
AT1G09490	TCV = Mock > NES	0.256644	-0.16013	0.164262	749.349	789.359	685.15	863.354	785.011	836.55	744.246	560.945	679.342
AT1G09500	TCV > Mock > NES	1.11022e-16	4.35184	2.52053	182.672	248.237	144.242	17.0175	1.18225	9.93921	58.7332	18.1683	23.3108
AT1G09510	TCV = Mock = NES	0.899582	7.27298	7.27298	0.982109	2.67882	0.948961	0	0	0	0	0	0
AT1G09520	Mock < TCV < NES	1.61994e-05	0.604402	-1.03264	551.945	615.236	635.804	359.636	422.062	404.195	1514.79	1327.04	846.681
AT1G09530	TCV = NES > Mock	2.7672e-11	1.63805	0.200677	466.502	653.632	457.399	169.04	173.79	163.997	465.482	520.067	387.125
AT1G09540	TCV < Mock < NES	0.0362167	-2.5005	-1.29485	1.96422	4.4647	1.89792	12.4795	8.27572	26.5046	5.25969	6.05609	9.1578
AT1G09550	TCV = Mock = NES	0.900661	7.51824	1.66097	0	3.57176	1.89792	0	0	0	0.876615	0	0.832528
AT1G09560	TCV > NES > Mock	-2.22045e-16	1.08944	2.03888	4335.03	4791.52	3963.81	2182.78	1808.84	2160.12	1122.94	922.04	1140.56
AT1G09570	TCV = NES > Mock	0.0103486	0.745064	0.00814664	2955.16	2224.31	2534.68	1452.16	1503.82	1646.6	3200.52	2283.15	2187.05
AT1G09575	TCV < Mock < NES	1.11022e-16	-3.52291	-1.53149	17.678	8.03646	16.1323	172.444	204.528	104.362	31.5581	54.5048	34.9662
AT1G09580	TCV < Mock < NES	4.66294e-13	-1.51697	-0.897969	85.4434	53.5764	80.6617	182.654	250.636	195.471	113.96	151.402	144.027
AT1G09590	TCV = Mock = NES	0.960678	-0.050494	0.060317	1980.38	1892.37	2148.41	1717.79	2448.45	2069.39	2064.36	2145.82	1564.44
AT1G09600	TCV > Mock = NES	0.00668854	3.94623	5.35725	194.457	1232.26	401.411	43.111	39.0141	36.4438	8.76615	16.6542	19.1481
AT1G09610	TCV > Mock = NES	0.041018	1.53113	2.7799	63.8371	266.096	104.386	48.7835	56.7478	44.7264	22.792	20.4393	19.9807
AT1G09620	TCV = Mock < NES	1.11022e-16	-0.127555	-1.14783	3931.38	3894.11	4664.14	4331.52	4377.85	4934.82	9827.73	9823.74	8023.07
AT1G09630	TCV > NES > Mock	8.43769e-15	0.333067	0.629942	548.999	511.655	523.827	375.519	459.893	422.416	312.075	333.842	377.968
AT1G09640	TCV = NES > Mock	1.11022e-15	0.781906	0.0725794	9484.22	8708.85	9804.67	4847.71	5993.98	5441.72	9616.46	9064.45	7943.15
AT1G09645	TCV > Mock > NES	0	1.57283	1.03715	1573.34	1485.85	1233.65	453.8	532.01	457.204	675.87	619.235	796.729
AT1G09650	TCV = Mock = NES	0.337614	0.34714	1.34932	14.7316	39.2894	11.3875	20.421	9.45796	21.535	4.38307	12.1122	9.1578
AT1G09660	TCV = NES < Mock	0.0323139	-0.44241	-0.134728	595.158	557.195	696.538	715.869	943.432	853.115	650.448	693.422	686.003
AT1G09680	TCV = NES > Mock	0.00594759	3.07524	0.800096	352.577	1035.81	460.246	94.1634	47.2898	77.8571	336.62	351.253	373.805
AT1G09690	TCV = Mock < NES	0.000663516	0.256924	-0.448151	4226.54	3190.24	4348.18	2830.42	3575.09	3440.24	5734.01	5700.6	4616.24
AT1G09700	TCV < Mock = NES	1.9458e-06	-0.529523	-0.64271	277.937	269.668	332.136	392.537	459.893	417.447	483.891	504.17	385.46
AT1G09710	TCV > Mock > NES	0	1.75818	0.811803	392.843	446.47	403.309	90.7599	91.0329	185.532	236.686	225.589	245.596
AT1G09720	TCV > Mock = NES	1.61053e-10	14.5112	14.5112	79.5508	417.896	203.078	0	0	0	0	0	0
AT1G09730	Mock < TCV < NES	0	0.526093	-0.287666	2062.43	2245.74	2075.38	1514.56	1359.58	1558.8	2587.77	2634.4	2570.01
AT1G09740	TCV > Mock = NES	0	2.26848	2.7087	1215.85	986.699	929.033	224.631	228.173	197.128	154.284	158.215	166.506
AT1G09750	TCV < Mock < NES	0	-3.2331	-0.946358	76.6045	17.8588	323.596	1055.08	1522.73	1353.39	252.465	280.094	273.069
AT1G09760	Mock < TCV < NES	1.25167e-12	0.474703	-0.498006	1639.14	1409.95	1857.12	1057.35	1391.5	1081.72	2459.78	2352.79	2116.29
AT1G09770	TCV = Mock < NES	0.000441256	0.323885	-0.416326	4021.09	3042.25	4080.53	2795.41	3069.51	3038.08	5446.41	5196.13	4229.24
AT1G09780	Mock < TCV < NES	1.11022e-16	0.594533	-0.389275	4726.55	4701.33	5158.55	3100.59	3468.31	3091.09	5626.99	6747.24	6730.15
AT1G09794	TCV = Mock = NES	0.958023	0.262791	0.199542	111.96	129.476	119.569	111.181	105.22	84.4833	120.973	105.982	87.4154
AT1G09795	TCV < Mock < NES	1.11022e-16	-1.21273	-0.828969	1098	1022.42	977.43	2404	2468.53	2307.55	1927.68	1722.2	1853.21
AT1G09800	TCV > Mock = NES	0	1.23176	1.2095	275.402	350.142	279.812	123.662	137.081	124.737	129.936	136.66	124.878
AT1G09810	TCV = Mock = NES	0.644514	0.209102	-0.11766	684.53	624.165	716.466	503.718	708.165	540.03	759.148	781.236	656.864
AT1G09812	TCV < Mock = NES	4.44678e-12	-2.05076	-1.49825	24.5527	27.6812	35.1116	121.391	89.8506	150.745	76.2655	101.44	69.0998
AT1G09815	TCV > Mock = NES	0	2.14839	1.84464	848.542	1060.81	840.78	187.192	221.08	212.036	287.53	264.197	213.96
AT1G09820	TCV = NES < Mock	0.0347333	-0.68658	-0.28061	243.563	373.249	251.475	467.414	497.725	432.356	405.873	372.45	276.399
AT1G09830	TCV > NES > Mock	0	0.183731	0.533613	1017.46	994.736	971.736	800.956	898.506	927.66	721.454	647.245	692.663
AT1G09840	TCV < Mock = NES	-2.22045e-16	-0.465712	-0.470764	1347.45	1372.45	1213.72	1736.92	1772.19	1923.24	1826.87	1755.51	1869.02
AT1G09850	Mock < TCV < NES	0	0.24292	-0.837889	856.399	1197.43	896.768	865.623	769.642	858.085	1747.97	1682.84	1843.22
AT1G09860	TCV > Mock > NES	0.000469683	10.2345	2.01693	4.91054	16.9659	14.2344	0	0	0	0.876615	3.02805	4.99517
AT1G09870	TCV > Mock > NES	1.11022e-16	0.943821	0.662578	1812.97	1870.71	1835.29	963.19	968.259	937.599	1143.98	1144.6	1198.01
AT1G09880	TCV = Mock > NES	2.37662e-05	0.355215	3.13037	25.5348	98.2234	49.346	38.573	52.0188	44.7264	8.76615	6.8131	4.16264
AT1G09890	TCV = Mock > NES	0.262815	0.0855075	1.22809	60.8907	280.383	172.711	145.216	195.07	144.119	59.6098	67.374	92.4106
AT1G09900	TCV < Mock < NES	0	-1.18963	-0.934906	451.77	371.463	466.889	926.886	1036.83	979.012	810.869	912.956	742.615
AT1G09910	TCV > Mock = NES	6.21769e-05	2.71103	2.15081	1807.08	3921.79	2082.02	419.765	319.206	453.891	592.096	504.927	661.859
AT1G09920	TCV > NES > Mock	1.11022e-16	0.451268	0.991858	1492.8	1522.46	1354.17	1093.66	1131.41	970.729	717.071	636.647	843.35
AT1G09930	TCV > Mock > NES	1.62634e-05	7.16765	4.45775	77.5866	304.493	125.263	1.1345	2.36449	0	7.01292	6.05609	9.99033
AT1G09932	TCV > Mock = NES	0.0110042	5.44174	3.00167	6075.32	1541.22	2320.21	125.929	49.6543	53.0091	501.424	334.599	404.608
AT1G09935	TCV > Mock = NES	4.21291e-05	11.3033	4.5765	44.1949	10.7153	20.8771	0	0	0	0.876615	2.27103	0
AT1G09940	TCV = Mock = NES	0.931826	0.126454	0.171376	1283.62	855.437	898.666	1098.2	962.348	722.249	1000.22	853.909	843.35
AT1G09950	TCV < Mock < NES	0	-2.7708	-1.94483	18.6601	8.03646	33.2136	154.292	128.865	125.897	78.8953	80.2432	71.5974
AT1G09960	TCV = Mock = NES	0.615921	0.289949	-0.14636	164.012	158.943	228.7	158.83	138.323	154.058	170.94	208.178	231.443
AT1G09970	TCV = NES > Mock	2.9976e-15	1.14675	-0.13344	8501.13	7235.5	6445.34	4396.18	2453.16	3168.95	8824.88	7828.25	7678.4
AT1G09980	NES < TCV < Mock	0.000823006	-0.168448	0.20575	1388.7	1239.4	1244.09	1510.02	1319.39	1522.36	1051.94	1098.42	1207.16
AT1G09995	Mock < TCV < NES	1.1549e-09	0.457339	-0.238066	290.704	304.493	291.331	218.958	232.902	193.815	308.568	356.552	380.465
AT1G10000	TCV = Mock = NES	0.998434	-0.571372	-0.118473	3.92843	3.57176	4.74481	5.6725	5.91123	6.62614	7.01292	3.78506	2.49758
AT1G10010	TCV = Mock = NES	0.994788	-0.914751	1.11786	0	0.89294	0.948961	1.1345	2.36449	0	0	0	0.832528
AT1G10020	TCV = NES < Mock	0.0181913	-0.941169	-0.293828	440.967	377.714	716.466	781.67	1211.8	954.164	568.046	674.497	639.381
AT1G10030	TCV < Mock < NES	0	-2.61326	-1.72602	60.8907	44.647	76.8659	356.233	388.959	371.064	186.719	211.963	204.802
AT1G10040	TCV = NES > Mock	0.104405	1.23626	-0.546403	163.03	166.087	157.528	60.1285	76.846	69.5745	379.574	160.486	170.668
AT1G10050	TCV > Mock > NES	1.11022e-16	1.23996	0.834975	1206.03	1017.06	1106.49	462.876	315.66	631.14	694.279	550.347	621.898
AT1G10060	TCV = NES < Mock	0	-1.84435	-0.210839	116.871	127.69	96.794	432.244	404.328	389.286	113.96	111.281	169.836
AT1G10070	TCV > Mock > NES	0	8.2882	4.82631	2194.03	1121.53	1542.06	7.94149	5.91123	1.65653	35.9412	21.1963	114.056
AT1G10090	TCV = Mock = NES	0.861402	-0.361506	-0.229412	841.667	624.165	646.243	1278.58	659.693	775.258	869.602	837.255	769.255
AT1G10095	Mock < TCV < NES	0	1.25163	-0.933443	306.418	300.921	256.22	144.081	107.584	110.988	636.422	545.805	467.048
AT1G10100	TCV = Mock = NES	0.50501	5.91956	5.91956	0	1.78588	0	0	0	0	0	0	0
AT1G10110	Mock < TCV < NES	6.96241e-05	2.14288	-0.81681	48.1233	57.1482	44.6012	14.7485	5.91123	13.2523	102.564	117.337	44.124
AT1G10120	TCV < Mock = NES	0	-1.46173	-1.74689	370.255	310.743	546.602	992.687	1222.44	1166.2	1207.98	1375.49	1536.85
AT1G10130	Mock < TCV < NES	3.33067e-16	0.29465	-0.236469	1922.97	1911.79	1965.3	1538.38	1437.61	1752.61	2176.63	2235.45	2420.99
AT1G10140	TCV > Mock > NES	-2.22045e-16	4.8452	1.82445	677.655	546.479	628.212	26.0935	20.0982	18.2219	365.548	65.86	91.578
AT1G10150	TCV > Mock = NES	0.000268257	0.403873	0.716179	753.277	1082.12	901.346	675.027	799.198	594.27	561.033	540.46	564.37
AT1G10155	NES < TCV < Mock	3.09794e-07	-0.72404	1.28609	113.925	232.288	116.889	193.999	295.561	275.411	58.7332	46.9809	84.1685
AT1G10170	Mock < TCV < NES	0.00228074	1.69717	-1.45304	2875.61	3510.15	3346.04	997.225	839.394	1164.54	12696	9179.52	4768.72
AT1G10180	TCV < Mock = NES	0	-0.91016	-0.712636	473.376	354.497	475.43	783.939	803.927	861.398	702.168	725.217	708.481
AT1G10190	TCV > Mock = NES	0.158664	7.9128	7.9128	0	6.25058	0.948961	0	0	0	0	0	0
AT1G10200	TCV = NES > Mock	0.0789241	0.444239	0.175027	1427	1213.51	1283	737.424	1038.01	1108.22	1087	1129.46	1258.78
AT1G10210	TCV > Mock = NES	0	1.27297	1.23576	901.576	958.125	836.035	402.747	325.117	387.629	342.756	382.291	419.594
AT1G10220	TCV = Mock = NES	0.835004	1.5712	0.707443	18.6601	11.6082	18.9792	5.6725	5.91123	4.9696	14.0258	5.29908	10.8229
AT1G10225	TCV = Mock = NES	0.971553	6.52609	6.52609	0	1.78588	0.948961	0	0	0	0	0	0
AT1G10230	TCV = Mock < NES	0.152433	-0.228973	-0.57536	121.781	81.2576	138.548	114.584	130.047	155.714	193.732	177.898	137.367
AT1G10240	TCV = Mock > NES	0.152522	0.0128242	0.512223	346.684	214.306	332.136	293.835	276.645	314.742	247.205	190.01	188.984
AT1G10270	TCV = Mock < NES	0.224282	0.270402	-0.407548	528.374	420.575	563.683	408.42	398.417	447.264	787.2	730.516	488.694
AT1G10280	TCV = Mock = NES	0.581767	0.119065	0.232709	383.022	386.643	365.35	339.215	321.571	384.316	294.543	321.73	349.662
AT1G10290	TCV > Mock = NES	0	1.44206	1.36562	5569.54	5635.35	5884.51	1957.01	1938.88	2393.69	2144.2	2041.66	2445.97
AT1G10300	TCV = NES > Mock	4.19756e-05	7.17659	0.497044	55.9802	358.962	164.17	1.1345	1.18225	1.65653	207.758	164.271	38.2963
AT1G10310	TCV > NES > Mock	4.00902e-13	0.894082	1.41194	753.277	990.271	722.16	440.186	457.529	429.043	263.861	266.468	396.283
AT1G10320	TCV > Mock = NES	8.7752e-12	0.83763	1.08359	899.611	1283.16	1055.24	664.816	555.655	591.383	533.858	492.814	501.182
AT1G10330	TCV = Mock < NES	0.000900491	-0.00205076	-0.853959	59.9086	54.4694	52.1929	65.801	49.6543	51.3526	121.849	105.982	73.2624
AT1G10340	TCV > Mock > NES	0	5.43754	2.84505	8606.22	6399.7	6649.37	199.672	94.5796	205.41	1050.18	1012.88	950.746
AT1G10350	TCV > Mock = NES	5.12774e-10	0.497938	0.485828	606.943	538.443	528.571	450.396	368.861	366.094	405.873	373.207	416.264
AT1G10360	TCV < Mock < NES	0	-2.58762	-1.49734	392.843	307.171	387.176	2062.52	2365.67	2107.11	1051.06	1098.42	919.943
AT1G10370	TCV < Mock < NES	0	-4.77873	-2.28277	323.114	175.909	215.414	6370.21	6595.75	6646.02	1006.35	841.04	1629.26
AT1G10380	TCV < Mock < NES	1.11022e-16	-1.80501	-0.346971	70.7118	119.654	127.161	346.022	367.678	395.912	136.752	109.767	157.348
AT1G10385	TCV = Mock = NES	0.542981	-0.869753	-1.7283	0	0.89294	0	0	0	1.65653	0	3.02805	0
AT1G10390	TCV > Mock = NES	0	1.21333	1.18371	4979.29	4841.52	4492.38	1995.58	1979.08	2198.22	2226.6	1978.83	2095.47
AT1G10400	TCV > NES > Mock	5.40587e-07	6.36459	9.24584	161.066	990.271	409.951	5.6725	8.27572	4.9696	0.876615	0	1.66506
AT1G10410	TCV > Mock = NES	0	1.34448	1.07506	3538.54	3055.64	2664.68	1486.19	1119.59	1040.3	1544.6	1381.55	1468.58
AT1G10417	TCV > Mock = NES	0.00744853	3.64569	4.20902	73.6581	407.181	145.191	20.421	13.0047	16.5653	8.76615	15.8972	9.1578
AT1G10430	TCV = Mock = NES	0.626946	-0.175265	-0.00788827	1022.37	1021.52	997.358	1084.58	1307.56	1041.96	974.796	1024.99	1058.14
AT1G10450	TCV = NES > Mock	0.0440313	0.293924	-0.228648	1271.83	1030.45	1154.89	929.155	881.955	1008.83	1502.52	1418.64	1129.74
AT1G10460	TCV = NES < Mock	1.0898e-06	-2.81381	-0.691969	1.96422	0.89294	4.74481	18.152	18.9159	16.5653	5.25969	4.54207	2.49758
AT1G10470	TCV < Mock < NES	4.01936e-09	-1.23842	-0.662374	2475.9	1307.26	2570.74	4887.42	5778.82	4325.21	3182.11	3155.22	3718.9
AT1G10490	TCV < Mock = NES	0.000256834	-1.03275	-1.9831	449.829	351.818	587.441	881.506	815.824	1144.67	2228.35	2205.17	1058.22
AT1G10500	TCV > NES > Mock	1.11022e-16	0.474566	1.03063	3292.99	3424.43	2868.67	2413.08	2213.09	2272.77	1425.38	1316.44	1950.54
AT1G10510	TCV = NES < Mock	0	-0.94758	-0.134394	1197.19	1168.86	1122.62	2094.29	2442.52	2191.6	1264.96	1300.55	1263.78
AT1G10520	TCV > Mock = NES	0.0029943	2.87089	1.84791	136.513	359.855	169.864	28.3625	29.5561	33.1307	67.4993	73.4301	44.124
AT1G10522	TCV = NES > Mock	0	0.789656	-0.0945845	677.655	643.81	628.212	367.578	384.23	376.033	701.292	732.787	647.706
AT1G10530	TCV = Mock = NES	0.497045	0.736722	-0.210322	15.7137	33.9317	30.3668	17.0175	17.7337	13.2523	27.1751	37.0936	28.3059
AT1G10540	TCV > Mock = NES	0	4.3301	3.61536	256.33	208.948	172.711	11.345	7.09347	13.2523	9.64276	17.4113	24.9758
AT1G10550	TCV = Mock = NES	0.313592	-1.57288	-0.431488	0	0.89294	16.1323	9.07599	20.0982	21.535	5.25969	6.05609	11.6554
AT1G10560	TCV = NES < Mock	0	-1.88353	0.041487	133.567	116.082	160.374	535.484	404.328	573.161	122.726	140.804	134.869
AT1G10570	TCV = Mock > NES	2.55351e-15	-0.104147	0.304333	983.091	924.193	985.022	1086.85	1062.84	959.134	824.895	763.067	754.27
AT1G10580	TCV > Mock = NES	4.04538e-05	0.494518	0.396517	1407.36	1259.94	1445.27	898.523	1049.83	970.729	1131.71	1115.08	877.484
AT1G10585	TCV < Mock = NES	6.07863e-05	-1.561	-1.41893	22.5885	34.8247	8.54065	89.6254	43.7431	61.2918	70.1292	52.9908	53.2818
AT1G10590	TCV > Mock = NES	0	0.613627	0.646011	2892.31	2687.75	2797.54	1655.23	1994.45	1825.5	1741.83	1749.45	1862.36
AT1G10600	Mock < TCV < NES	0	1.25703	-1.088	1554.68	1289.41	1248.83	627.378	478.809	606.292	3211.92	3180.2	2308.6
AT1G10610	Mock < TCV < NES	0	1.09876	-1.65927	1122.55	1186.72	1121.67	493.507	581.665	526.778	3661.62	3841.83	3333.44
AT1G10620	TCV > Mock = NES	0.0170343	9.68724	3.21701	0.982109	15.18	8.54065	0	0	0	2.62984	0	0
AT1G10630	TCV = Mock = NES	0.916374	0.124416	0.174805	1992.7	1789.45	2159.84	1693.81	2014.55	1742.67	1532.32	1661.64	2069.96
AT1G10640	TCV < Mock < NES	0	-9.77951	-4.86055	1.96422	0.89294	0	791.88	1107.76	637.766	19.2855	12.1122	52.4492
AT1G10650	NES < TCV < Mock	2.22045e-16	-1.31672	0.278744	1688.24	1394.77	1144.45	3748.39	3467.53	3314.73	1146.61	1031.05	1307.07
AT1G10657	TCV < Mock < NES	0	-5.06724	-3.05259	24.5527	31.2529	33.2136	1243.41	971.806	770.289	207.758	243.001	288.055
AT1G10660	Mock < TCV < NES	1.11022e-16	0.89349	-0.668017	2331.53	3246.73	2171.22	1452.16	1533.37	1186.08	3910.58	4166.59	4235.9
AT1G10670	TCV < Mock < NES	0	-1.73675	-0.823377	2522.05	1974.29	2300.28	6932.92	8236.62	7482.57	3846.59	3847.89	4332.47
AT1G10680	TCV > Mock = NES	0.0348222	3.12266	8.40127	1.96422	6.25058	1.89792	1.1345	0	0	0	0	0
AT1G10690	TCV > Mock = NES	-2.22045e-16	1.97238	1.8918	482.215	360.748	461.195	139.543	109.949	82.8267	71.8824	118.851	160.678
AT1G10700	TCV = Mock < NES	0.000124349	-0.134862	-0.576167	538.195	349.14	390.972	525.273	449.253	429.043	646.065	641.189	618.568
AT1G10710	TCV = Mock = NES	0.991505	-0.887557	0.0454035	3.92843	0.89294	6.64273	6.80699	9.45796	4.9696	2.62984	6.8131	1.66506
AT1G10720	TCV > Mock = NES	0	0.485748	0.660699	1334.69	1170.64	1148.24	883.775	926.88	798.45	746.876	760.039	804.222
AT1G10730	TCV > Mock > NES	1.11022e-16	1.22845	0.370503	682.565	711.673	549.449	280.221	257.729	291.55	525.969	466.319	511.172
AT1G10740	TCV = Mock > NES	0.00141678	0.0115123	0.444436	2028.05	2101.09	1933.98	1834.49	2454.34	1726.11	1519.17	1534.46	1401.98
AT1G10750	TCV < Mock < NES	0	-3.9843	-3.2876	4.91054	8.03646	14.2344	141.812	143.052	145.775	64.8695	115.066	85.7503
AT1G10760	TCV = Mock = NES	0.600072	0.556902	0.0947899	6776.55	5727.32	5182.28	4435.89	3118.76	4467.67	4932.71	4773.71	6855.03
AT1G10770	TCV = Mock = NES	0.996123	2.20487	0.1159	0.982109	2.67882	1.89792	0	1.18225	0	2.62984	0	2.49758
AT1G10780	TCV < Mock < NES	0	-2.16275	-1.24093	19.6422	18.7517	19.9282	91.8944	98.1264	71.231	44.7074	50.7198	42.4589
AT1G10790	TCV = Mock < NES	7.5438e-08	0.740553	-1.23798	19.6422	10.7153	13.2855	9.07599	7.09347	9.93921	32.4347	35.5795	34.9662
AT1G10800	TCV > Mock = NES	0.0135861	1.87777	1.73316	50.0875	164.301	98.692	38.573	28.3739	18.2219	25.4218	37.0936	31.636
AT1G10810	TCV = Mock = NES	0.998073	-0.393934	0.421084	5.89265	7.14352	9.48961	10.2105	9.45796	9.93921	1.75323	7.57011	7.49275
AT1G10820	TCV = NES < Mock	7.71862e-10	-0.370191	-0.0790267	584.355	544.694	611.131	747.635	766.095	735.501	605.741	581.385	651.037
AT1G10830	NES < TCV < Mock	0.000211999	-0.466211	0.652715	469.448	916.157	591.203	928.02	981.264	821.641	410.256	387.59	459.555
AT1G10840	TCV = Mock = NES	0.61624	-0.391097	-0.163534	2645.8	2611.85	2711.18	3075.63	3968.8	3405.84	3301.33	3210.49	2413.5
AT1G10850	TCV < NES < Mock	0	-2.3294	-3.04002	218.028	91.9729	540.908	1242.28	1462.44	1572.05	2202.93	2647.27	2148.75
AT1G10865	TCV > Mock = NES	1.32117e-14	1.65085	1.19069	1531.11	1076.89	1154.89	462.876	400.781	334.62	578.566	516.282	553.631
AT1G10870	TCV < Mock < NES	0	-0.757725	-0.417165	746.402	652.739	748.73	1164	1207.07	1260.62	885.381	947.021	1035.66
AT1G10890	TCV > NES > Mock	1.11022e-16	0.567854	0.804733	2127.25	1773.38	1857.12	1342.11	1298.11	1244.06	1054.57	1022.72	1218.82
AT1G10900	TCV = Mock = NES	0.947188	-0.0441588	0.0960849	1717.71	1846.6	1431.98	1888.94	1430.52	1832.13	1649.79	1401.98	1622.6
AT1G10910	TCV < Mock < NES	0	-2.30887	-1.30846	460.609	376.821	453.603	2069.33	2268.73	2059.07	1063.33	996.227	1138.07
AT1G10920	TCV = NES > Mock	0.000789268	1.43622	0.127999	1756.01	3329.77	2044.06	988.149	619.497	1027.05	2361.6	2292.23	1870.69
AT1G10930	TCV = Mock = NES	0.462086	1.0539	2.30108	298.561	1840.35	701.282	422.034	462.258	483.708	172.693	193.795	209.797
AT1G10940	TCV > NES > Mock	4.05882e-09	0.38114	0.906481	4408.69	3439.61	3455.17	2947.43	2985.17	2746.53	1909.27	1736.58	2384.36
AT1G10950	Mock < TCV < NES	-2.22045e-16	0.253442	-0.534239	5239.55	4940.64	5392.95	4172.69	4597.75	4293.74	6793.76	7502.74	8256.18
AT1G10960	NES < TCV < Mock	-2.22045e-16	-0.742378	0.67288	7937.4	7516.77	7995	11706.9	13993.1	13528.9	4279.63	3773.7	6655.23
AT1G10970	TCV = NES > Mock	0	2.10911	0.0280191	185.619	212.52	215.414	38.573	39.0141	64.6049	198.992	193.795	208.964
AT1G10980	TCV > Mock = NES	0.12281	1.68746	2.15606	1.96422	10.7153	17.0813	5.6725	3.54674	0	4.38307	2.27103	0
AT1G10990	TCV = NES < Mock	0.00302955	-1.01061	-0.183364	55.9802	31.2529	73.07	136.14	104.038	82.8267	52.5969	71.1591	58.2769
AT1G11000	TCV < Mock = NES	1.11022e-16	-2.70389	-2.34719	35.3559	31.2529	157.528	416.361	461.076	583.1	381.327	383.805	375.47
AT1G11020	TCV = NES > Mock	0.000261796	0.404132	0.151232	664.887	627.737	566.53	466.279	426.791	511.869	587.332	555.646	531.153
AT1G11040	TCV > Mock = NES	2.99663e-05	9.4268	3.53341	3.92843	6.25058	10.4386	0	0	0	1.75323	0	0
AT1G11050	TCV = Mock = NES	0.509847	0.691378	0.46307	1878.77	1468.89	1497.46	1073.24	972.988	954.164	1628.75	1189.26	696.826
AT1G11060	TCV = Mock = NES	0.860104	0.125598	0.121744	925.146	843.829	844.576	820.243	805.109	770.289	832.784	801.675	767.59
AT1G11070	TCV = NES > Mock	0.00136815	2.61346	0.211729	112.942	85.7223	55.0398	15.883	10.6402	14.9088	114.837	73.4301	30.8035
AT1G11080	TCV > Mock = NES	0.119173	9.44836	1.22675	9.82109	4.4647	6.64273	0	0	0	4.38307	4.54207	0
AT1G11090	NES < TCV < Mock	1.11022e-16	-0.543229	0.216	413.468	369.677	430.828	597.881	561.567	609.605	313.828	338.384	392.953
AT1G11100	TCV > Mock > NES	1.60982e-14	2.27009	1.19519	151.245	107.153	160.374	28.3625	23.6449	34.7872	75.3889	57.5329	49.9517
AT1G11110	TCV = Mock = NES	0.990826	4.9432	0.0976668	0	0.89294	0	0	0	0	0	0	0.832528
AT1G11112	TCV < Mock = NES	0.000283332	-10.103	-8.96063	0	0	0	14.7485	8.27572	9.93921	6.1363	3.78506	4.99517
AT1G11120	TCV = NES < Mock	5.44165e-12	-4.97233	-2.54993	0.982109	0	0.948961	21.5555	20.0982	19.8784	3.50646	3.78506	4.16264
AT1G11125	TCV = Mock = NES	0.999113	0.105823	0.291847	17.678	6.25058	18.9792	13.614	13.0047	13.2523	10.5194	12.8692	11.6554
AT1G11130	TCV < Mock < NES	0	-4.13839	-2.66252	50.0875	51.7905	76.8659	951.845	954.072	1242.4	336.62	415.599	379.633
AT1G11160	TCV < Mock < NES	0	-4.85018	-2.8111	1.96422	1.78588	3.79585	57.8595	66.2057	94.4225	16.6557	18.1683	18.3156
AT1G11170	TCV = NES < Mock	0.367417	-0.956681	-0.417808	30.4454	29.467	18.9792	47.649	59.1123	46.383	42.9541	33.3085	29.1385
AT1G11180	TCV > Mock = NES	0	1.1966	1.41915	366.326	424.147	335.932	164.502	134.776	192.158	149.901	126.421	144.86
AT1G11190	NES < TCV < Mock	0.00461208	-0.295197	0.479781	201.332	124.119	167.017	201.941	223.444	178.906	95.551	130.206	127.377
AT1G11200	TCV > Mock = NES	9.39684e-07	0.440787	0.241559	726.76	645.596	613.029	509.39	464.622	488.678	574.183	547.319	557.793
AT1G11210	TCV > Mock > NES	3.07243e-12	2.74134	1.74883	495.965	341.103	313.157	72.6079	16.5514	82.8267	116.59	74.9441	150.687
AT1G11220	TCV = Mock = NES	0.633003	-0.175634	0.591387	20.6243	20.5376	12.3365	30.6315	24.8272	4.9696	10.5194	8.32712	16.6506
AT1G11230	TCV = Mock = NES	0.99296	0.175766	5.98872	0.982109	0.89294	0	0	0	1.65653	0	0	0
AT1G11240	TCV = Mock = NES	0.840041	-0.281122	-0.352966	404.629	352.711	414.696	411.823	573.389	438.982	634.669	561.702	300.542
AT1G11250	TCV = NES < Mock	0.0152044	-9.28495	-6.44612	0	0	0	5.6725	4.72898	8.28267	1.75323	0	0.832528
AT1G11260	TCV > Mock = NES	0.000231759	1.88444	2.80793	9651.18	3361.03	8280.64	1978.57	1903.42	1885.14	1213.23	843.311	984.048
AT1G11270	Mock < TCV < NES	1.67399e-12	0.753942	-0.581474	126.946	192.32	139.98	75.1175	104.049	93.1453	247.631	229.025	210.564
AT1G11280	TCV < Mock = NES	2.40875e-09	-1.16554	-0.816548	486.144	747.391	656.681	1318.29	1470.71	1451.12	1229.89	1256.64	842.518
AT1G11290	TCV = Mock < NES	1.22047e-05	-0.270866	-1.23483	109.996	275.026	147.089	228.034	182.066	231.915	419.898	484.487	347.997
AT1G11300	TCV > Mock = NES	2.96126e-06	2.11873	2.21671	1104.87	550.051	640.549	199.672	121.771	207.067	134.122	133.234	226.447
AT1G11303	TCV < Mock < NES	0	-1.49482	-0.391296	204.279	272.347	279.944	723.81	634.866	773.602	302.432	378.506	311.365
AT1G11310	TCV > Mock = NES	2.38516e-07	1.27027	1.22806	12677.1	8329.35	8628.9	4270.25	3059.65	4956.35	4476	3993.23	4181.79
AT1G11320	TCV < Mock = NES	9.43187e-06	-0.443812	-0.548479	132.585	141.085	133.804	161.099	184.43	208.723	198.115	218.019	179.826
AT1G11330	TCV < Mock = NES	0.206138	-0.944779	-0.799221	1285.58	2351.11	1891.28	3532.83	2251	4856.96	2375.63	3353.56	3890.4
AT1G11340	TCV > Mock = NES	0.143798	1.37039	2.87681	219.992	1022.42	355.86	226.9	172.608	218.663	74.5123	51.4768	91.578
AT1G11350	TCV < Mock = NES	0.354674	-0.776672	-0.446471	530.339	1316.19	822.749	1534.98	1238.99	1799	1297.39	1253.61	1086.45
AT1G11360	TCV > Mock = NES	0	1.301	1.14614	1236.47	1122.43	1165.32	442.455	502.454	485.365	518.956	481.459	591.927
AT1G11362	TCV = Mock = NES	0.980936	0	-4.71335	0	0	0	0	0	0	0	0.757011	0
AT1G11370	TCV = Mock = NES	0.979381	4.9432	4.9432	0	0.89294	0	0	0	0	0	0	0
AT1G11380	TCV < Mock = NES	0	-1.1766	-0.867423	103.121	106.26	100.59	232.572	224.627	243.511	193.732	195.309	176.496
AT1G11390	TCV < Mock = NES	0	-1.17285	-1.01358	507.75	426.825	524.776	1078.91	1003.73	1207.61	963.4	1044.68	938.259
AT1G11400	TCV < Mock = NES	0.128118	-0.212343	-0.208969	610.871	526.835	553.244	688.641	702.254	568.191	674.993	668.441	611.075
AT1G11410	TCV < Mock < NES	0	-1.94556	-1.04913	384.987	914.371	635.804	2363.16	2100.85	2990.05	1313.17	1296.76	1394.48
AT1G11420	TCV < Mock = NES	1.11022e-16	-2.15032	-1.91388	19.6422	7.14352	24.673	71.4734	79.2104	77.8571	52.5969	68.131	73.2624
AT1G11430	TCV = NES < Mock	4.62003e-06	-0.547598	-0.02219	2245.1	2186.81	2197.79	2981.46	3786.73	2922.13	2105.63	2165.05	2461.78
AT1G11440	TCV = Mock = NES	0.432032	-0.655722	-0.16374	596.14	955.446	584.56	1479.39	1034.46	851.459	757.395	813.787	821.705
AT1G11450	TCV < Mock < NES	0	-4.79743	-3.67562	8.83898	0.89294	16.1323	256.397	223.444	240.198	71.0058	107.496	152.353
AT1G11460	TCV = NES < Mock	1.38354e-06	-10.3755	-8.18565	0	0	0	14.7485	11.8225	13.2523	0	4.54207	4.16264
AT1G11470	TCV = Mock = NES	0.796063	5.07626	-2.24906	0.982109	0	0	0	0	0	1.75323	3.02805	0
AT1G11475	TCV = Mock < NES	0.0524988	0.284123	-0.378645	844.613	727.746	895.819	689.775	692.796	644.392	1222.88	1155.2	830.862
AT1G11480	TCV > Mock > NES	0	1.20105	0.571887	2549.55	2313.61	2272.76	993.821	1066.39	1043.62	1634.01	1455.73	1710.84
AT1G11490	TCV < NES < Mock	0	-3.12912	-4.47891	0.982109	1.78588	3.79585	12.4795	23.6449	21.535	39.4477	48.4487	59.1095
AT1G11500	TCV < Mock = NES	5.25075e-06	-4.09137	-3.41839	0.982109	0	1.89792	7.94149	20.0982	21.535	7.01292	9.08414	14.9855
AT1G11510	TCV = Mock = NES	0.844865	5.02822	-0.865169	0	0	0.948961	0	0	0	1.75323	0	0
AT1G11530	NES < TCV < Mock	1.76096e-08	-0.252195	0.276434	610.871	624.165	566.53	734.021	750.726	660.957	506.683	433.767	546.971
AT1G11540	TCV = NES > Mock	3.27654e-06	5.01127	-0.129101	13.7495	14.287	9.48961	1.1345	0	0	18.4089	15.1402	7.49275
AT1G11545	TCV < Mock < NES	1.11022e-16	-4.11186	-2.15973	4.91054	0.89294	103.437	439.051	824.025	626.17	114.837	162.757	210.629
AT1G11560	TCV = Mock = NES	0.997734	-0.79153	-0.406134	2.94633	0	0.948961	2.269	1.18225	3.31307	3.50646	0	1.66506
AT1G11570	TCV < Mock < NES	4.85945e-13	-2.38257	-1.50456	10.8032	10.7153	8.54065	60.1285	52.0188	44.7264	32.4347	28.7664	24.1433
AT1G11572	TCV > Mock > NES	2.83813e-05	3.71633	1.42381	19.6422	25.8953	13.2855	1.1345	0	3.31307	9.64276	10.5982	1.66506
AT1G11580	TCV < Mock = NES	1.92769e-06	-0.814196	-0.87779	631.496	683.099	731.649	1443.08	876.044	1278.84	1141.35	1414.1	1204.67
AT1G11591	TCV = Mock = NES	0.994263	-0.260318	-2.03964	0.982109	0	0	0	1.18225	0	0.876615	0.757011	2.49758
AT1G11600	NES < TCV < Mock	0.132103	-2.53628	0.495778	0	0	8.54065	38.573	9.45796	1.65653	4.38307	0	1.66506
AT1G11608	TCV = Mock = NES	0.979381	4.9432	4.9432	0	0.89294	0	0	0	0	0	0	0
AT1G11620	TCV = Mock = NES	0.980936	0	-4.71335	0	0	0	0	0	0	0	0.757011	0
AT1G11630	TCV < NES < Mock	1.11022e-16	-0.926484	-2.01896	274.008	251.809	299.872	475.355	580.482	513.526	1202.72	1284.65	859.168
AT1G11650	TCV = NES > Mock	0	0.665932	0.0437668	8043.47	7703.4	7709.36	4767.17	5042.28	4974.57	7940.38	7693.51	7121.44
AT1G11660	Mock < TCV < NES	0	0.327572	-0.903656	1524.23	1711.77	1654.04	1339.84	1211.8	1345.11	2763.97	3049.24	3335.11
AT1G11670	TCV < Mock < NES	2.66454e-15	-3.03858	-2.04938	49.1054	24.1094	64.5294	501.449	377.136	253.45	149.025	225.589	195.644
AT1G11680	TCV = Mock < NES	3.33067e-16	0.0869098	-0.440616	2660.53	2626.14	2549.86	2317.78	2386.95	2673.65	3261.88	3571.58	3802.15
AT1G11690	TCV > Mock = NES	0.00269537	11.0302	11.0302	5.89265	47.3258	9.48961	0	0	0	0	0	0
AT1G11700	TCV > Mock = NES	2.92794e-09	1.27938	1.90459	1314.06	1746.59	1061.89	555.905	385.412	757.036	318.211	280.851	502.014
AT1G11710	TCV = Mock < NES	8.50285e-05	0.368695	-1.58498	188.565	294.67	180.303	186.058	190.342	137.492	801.226	786.535	402.943
AT1G11720	TCV < Mock < NES	0	-1.9029	-1.09719	900.594	1020.63	856.912	3712.08	2862.22	3815	1858.42	1820.61	2264.47
AT1G11730	TCV = Mock = NES	0.634095	-0.850738	-0.25266	17.678	124.119	42.7033	129.333	112.313	91.1094	49.967	74.9441	94.9081
AT1G11740	TCV < Mock < NES	0.00190577	-4.00368	-2.10078	0	1.78588	1.89792	12.4795	35.4674	11.5957	6.1363	2.27103	7.49275
AT1G11750	NES < TCV < Mock	1.11022e-16	-0.789757	0.318148	1804.13	1451.92	1448.11	2722.8	2883.5	2526.22	1229.89	1093.88	1449.43
AT1G11755	TCV = Mock < NES	-2.22045e-16	0.18098	-0.77252	395.79	506.297	435.573	416.361	367.678	395.912	823.141	775.937	686.003
AT1G11760	TCV > Mock = NES	4.21885e-15	0.706516	0.575947	273.026	258.06	267.607	155.426	174.972	159.027	183.212	179.412	173.166
AT1G11770	TCV = Mock = NES	0.80027	7.52691	7.52691	0.982109	3.57176	0.948961	0	0	0	0	0	0
AT1G11780	TCV < Mock = NES	3.83953e-08	-0.317982	-0.428839	377.13	391.108	406.155	488.969	526.099	448.921	527.722	567.001	486.196
AT1G11785	TCV = Mock > NES	0.223942	0.479288	1.63012	59.9086	11.6082	69.2742	39.7075	16.5514	44.7264	7.01292	15.1402	23.3108
AT1G11790	TCV < Mock < NES	0	-3.2385	-1.82858	195.44	141.085	234.393	1727.84	1858.49	1802.31	553.144	588.955	885.809
AT1G11800	TCV = NES > Mock	0.307514	0.589788	0.011239	301.507	304.493	192.639	171.309	165.514	193.815	313.828	276.309	202.304
AT1G11810	TCV = Mock = NES	0.922027	7.94148	1.11528	0.982109	4.4647	1.89792	0	0	0	0.876615	0	2.49758
AT1G11820	TCV < Mock < NES	0	-3.34012	-1.94564	330.971	234.843	497.256	3327.49	3871.85	3566.52	1468.33	1433.78	1193.01
AT1G11840	TCV < Mock = NES	-2.22045e-16	-1.32146	-1.38366	3373.54	4674.54	4146.01	11086.3	9209.69	10179.4	9363.12	10648.9	11806.1
AT1G11850	TCV < Mock < NES	0	-8.40676	-4.37761	2.94633	2.67882	25.622	2953.1	5099.02	2562.66	202.498	144.589	303.04
AT1G11860	TCV < Mock < NES	0	-3.25357	-1.31146	4062	3480.68	4341.5	37078.8	39669.1	36594.5	9297.38	8825.24	11373.2
AT1G11870	TCV = NES < Mock	4.8338e-06	-0.95172	-0.151803	417.396	813.724	480.174	1124.29	1117.22	1068.46	651.325	690.394	559.459
AT1G11880	TCV = Mock = NES	0.999772	-0.0728158	-0.0401175	248.473	228.593	230.598	247.321	260.094	236.884	241.069	230.131	256.418
AT1G11890	NES < TCV < Mock	1.11022e-16	-0.267072	0.427931	1624.41	1455.49	1547.76	1835.62	1950.7	1782.43	1077.36	1062.09	1300.41
AT1G11900	TCV = Mock < NES	0.0178531	-0.0400562	-0.473613	108.032	116.082	85.4065	120.257	113.496	84.4833	154.284	142.318	133.204
AT1G11905	TCV = NES > Mock	4.88276e-07	1.27962	-0.103393	1037.11	781.323	947.063	374.385	435.066	329.65	845.933	863.75	1261.28
AT1G11910	TCV > Mock = NES	1.11022e-16	2.49038	2.15245	57252	58098.3	49472.2	10410.2	8389.21	10532.2	12212.1	10376.4	14485.1
AT1G11915	TCV = NES < Mock	1.71223e-08	-3.21066	-1.64899	3.92843	2.67882	1.89792	28.3625	22.4627	28.1611	7.88953	11.3552	7.49275
AT1G11925	TCV = Mock = NES	0.33685	6.63243	-1.38993	2.94633	0	0	0	0	0	7.01292	0.757011	0
AT1G11930	TCV = NES > Mock	-2.22045e-16	0.589548	0.0884831	3001.32	2842.23	2788.05	1976.3	2003.91	1755.93	2603.55	2646.51	2868.06
AT1G11940	TCV = NES < Mock	0.273163	-0.188933	0.201628	211.153	278.597	210.669	287.028	277.828	233.571	210.388	193.038	205.634
AT1G11950	TCV > Mock > NES	2.2307e-05	0.99962	0.332084	332.935	369.677	293.229	214.42	147.781	135.836	303.309	267.982	219.787
AT1G11960	TCV = Mock = NES	0.899256	-0.530322	0.111666	764.08	593.805	549.449	1646.16	482.356	626.17	664.474	540.506	560.291
AT1G11990	TCV < Mock = NES	0	-2.63099	-2.13433	19.6422	12.5012	96.794	315.391	281.374	202.097	171.816	219.533	174.831
AT1G12000	TCV < Mock < NES	7.39543e-08	-0.520907	-0.189041	1015.5	1000.09	1125.47	1451.02	1536.92	1519.04	1047.55	1236.2	1297.08
AT1G12010	TCV < Mock < NES	0	-2.91087	-1.15394	17.678	23.2164	10.4386	95.2979	141.869	149.088	49.0904	39.3646	25.8084
AT1G12020	TCV < Mock < NES	0.000102234	-1.17732	-0.543582	299.543	224.128	229.649	485.566	688.067	530.091	413.762	426.197	258.084
AT1G12030	TCV = Mock = NES	0.776039	-0.335201	-0.117633	5.89265	5.35764	18.0303	4.538	14.1869	18.2219	13.1492	13.6262	4.99517
AT1G12040	TCV = Mock = NES	0.991444	5.02822	0.110762	0	0	0.948961	0	0	0	0.876615	0	0
AT1G12050	TCV > Mock = NES	0	1.21727	1.39679	2501.43	2077.87	2058.3	1026.72	885.502	942.568	737.233	781.993	1001.53
AT1G12060	NES < TCV < Mock	1.22621e-05	-0.752256	0.949707	66.7834	108.046	62.6314	145.216	95.7619	159.027	33.3114	28.0094	61.607
AT1G12070	TCV = Mock = NES	0.9087	-3.63187	-3.17193	0	0	0.948961	4.538	5.91123	1.65653	1.75323	4.54207	2.49758
AT1G12080	TCV < Mock < NES	2.39798e-08	-5.1338	-2.8781	23.5706	2.67882	56.9377	546.829	1566.48	808.389	219.154	170.328	222.285
AT1G12090	TCV < Mock < NES	0	-4.46346	-2.83316	444.895	67.8635	450.757	6101.34	8753.34	6402.51	2231.86	2187.01	2447.63
AT1G12100	TCV = Mock = NES	0.883012	-3.17025	0.362908	0.982109	0	0	3.4035	2.36449	3.31307	0	0.757011	0
AT1G12110	TCV = Mock > NES	1.70997e-09	-0.125378	1.03981	6990.65	6232.72	4979.2	6597.11	5696.06	7562.08	2769.23	2109.03	3975.32
AT1G12120	TCV < Mock < NES	0	-0.984012	-0.747466	1076.39	904.549	1014.44	1960.41	1940.06	2024.29	1595.44	1719.17	1714.17
AT1G12130	TCV = Mock = NES	0.906101	0.350532	0.459627	0	2.67882	0.948961	0	1.18225	1.65653	2.62984	0	0
AT1G12140	TCV > Mock = NES	0	1.06147	1.18203	2712.58	2682.39	2290.79	1204.84	1082.94	1394.8	1100.15	1024.24	1262.94
AT1G12150	TCV = Mock = NES	0.972455	1.61582	2.12011	4.91054	1.78677	3.79585	3.4035	0	0	0.876615	1.51402	0
AT1G12160	TCV = NES > Mock	1.47796e-07	3.04132	-0.222707	331.953	584.876	416.594	57.8595	46.1076	57.9787	315.581	484.487	755.935
AT1G12200	TCV > Mock = NES	6.20672e-07	1.39463	1.46422	623.639	439.327	755.373	198.537	166.697	326.337	166.557	212.72	279.729
AT1G12210	TCV > Mock > NES	1.11022e-16	2.53227	0.625645	580.426	795.478	527.5	125.929	92.2151	110.865	415.472	385.319	432.851
AT1G12211	TCV > Mock > NES	3.85469e-13	3.81754	2.21114	121.781	67.1027	82.682	6.80699	2.36449	10.0618	22.8349	17.4113	18.3789
AT1G12220	Mock < TCV < NES	0	1.19334	-0.681992	892.737	968.84	907.207	460.607	322.753	427.386	1633.13	1560.2	1248.79
AT1G12230	NES < TCV < Mock	0	-0.695852	0.752074	1153	1351.91	1164.38	1772.09	2303.01	1868.57	750.382	688.123	740.117
AT1G12240	TCV > NES > Mock	0	1.6853	2.5975	20126.3	14715.7	20091.4	7071.33	4746.72	5262.81	2764.84	2719.94	3591.52
AT1G12244	TCV = Mock > NES	0.0301509	0.48702	2.31864	324.096	1515.32	779.097	665.951	640.777	561.565	164.804	171.085	188.984
AT1G12250	TCV = Mock > NES	1.52504e-05	-0.271982	1.14168	852.47	1791.24	1206.13	1769.82	1512.09	1366.64	531.229	469.347	744.28
AT1G12260	TCV < Mock < NES	0	-2.1465	-1.31005	35.3559	32.1459	37.0095	163.368	161.968	137.492	81.5252	105.225	72.4299
AT1G12270	TCV = Mock = NES	0.794856	-0.0674015	-0.358976	1548.79	892.94	1375.99	1297.87	1493.18	1209.27	1796.18	1713.12	1386.99
AT1G12280	TCV = Mock < NES	0.0110911	0.160234	-0.626358	964.431	1693.01	1055.24	1181.01	880.773	1260.62	2131.05	1850.14	1749.97
AT1G12290	TCV > Mock > NES	0	3.28147	1.92887	916.307	1142.07	1050.5	108.912	73.2992	137.492	226.167	224.832	365.48
AT1G12300	TCV = Mock < NES	0.00208134	0.384511	-0.734743	175.797	313.925	193.589	201.942	153.692	167.802	415.032	426.54	295.547
AT1G12310	TCV > NES > Mock	0	0.403425	1.13481	1418.07	1405.43	1646.73	1067.46	1280.37	1031.92	597.851	683.581	754.27
AT1G12320	TCV = Mock > NES	7.25272e-05	0.473046	1.22647	373.297	247.405	382.148	257.635	307.384	157.469	165.68	143.832	119.051
AT1G12330	TCV < Mock < NES	0	-3.1716	-1.80267	103.121	58.9341	209.72	1030.13	1269.73	1050.24	383.081	468.59	445.402
AT1G12340	TCV = NES < Mock	0.209772	-1.63274	1.5356	3.94415	0	3.95242	7.03049	8.61266	8.90719	0.912556	0	1.7916
AT1G12350	TCV = Mock < NES	3.97723e-07	0.0803745	-0.26598	716.939	705.423	681.354	654.606	627.772	707.34	907.296	837.255	785.073
AT1G12360	TCV > Mock = NES	0	1.11184	0.993422	4143.52	4620.07	3864.17	2068.19	1776.91	1997.78	2046.9	1961.42	2334.41
AT1G12370	TCV = NES < Mock	0	-1.77407	-0.148031	284.811	168.766	297.974	875.833	796.833	897.842	284.9	274.795	273.069
AT1G12380	TCV < Mock < NES	0	-3.639	-2.19215	28.4811	50.8976	193.588	1179.88	942.25	1278.84	314.705	413.328	519.497
AT1G12390	TCV = NES > Mock	4.02895e-07	0.514194	-0.102777	856.383	777.751	816.899	560.219	638.076	517.871	806.45	834.983	990.583
AT1G12400	TCV = NES > Mock	0.00403975	0.264642	-0.174335	278.919	327.709	291.331	267.742	241.178	238.541	313.828	332.328	367.145
AT1G12410	NES < TCV < Mock	0	-0.333582	0.518208	3462.91	3084.22	3042.37	4072.85	4202.88	3808.37	2197.67	2070.43	2427.65
AT1G12420	TCV = Mock = NES	0.480298	-0.321146	-0.481661	1482.98	756.32	1221.31	1669.98	1503.82	1149.64	1725.18	1710.09	1396.98
AT1G12430	TCV < Mock < NES	1.11022e-16	-1.60415	-0.556697	838.721	534.871	816.107	2289.42	2103.21	2264.48	949.374	1131.73	1139.73
AT1G12440	TCV > Mock > NES	1.11022e-16	1.41435	0.731323	3182.03	3222.62	3783.51	1162.86	1629.13	1030.36	2209.95	2112.82	1814.08
AT1G12450	TCV = NES < Mock	0	-0.843349	0.109144	140.442	108.046	127.161	220.093	243.543	210.38	104.317	124.907	119.051
AT1G12460	TCV < Mock < NES	1.11022e-16	-4.76598	-3.80858	55.9802	39.2894	148.987	2026.22	2150.5	2469.89	1087.88	1354.29	980.717
AT1G12470	TCV > NES > Mock	8.11386e-06	0.177296	0.378712	1877.79	1613.54	1828.65	1553.13	1447.07	1704.57	1343.85	1355.05	1392.82
AT1G12480	TCV = Mock > NES	0.223899	-0.336697	0.389959	201.332	192.875	151.834	277.952	163.15	248.48	143.765	101.44	171.501
AT1G12490	TCV > Mock = NES	0.00843431	3.78327	1.58482	13.7495	7.14352	11.3875	1.1345	1.18225	0	4.38307	3.02805	3.33011
AT1G12500	TCV < Mock < NES	0	-3.61215	-1.93337	175.797	88.4011	468.787	2769.31	3735.9	2458.3	810.869	993.956	994.87
AT1G12520	NES < TCV < Mock	1.0429e-08	-0.47435	0.364498	3337.2	2858.3	2898.13	4104.62	4964.25	3564.86	2382.64	2225.61	2455.12
AT1G12530	NES < TCV < Mock	2.50703e-09	-0.43363	0.283515	407.575	389.322	355.86	561.577	516.641	478.739	273.504	299.776	373.805
AT1G12550	TCV < Mock < NES	0	-2.51334	-1.5629	44.1949	50.0047	54.0908	290.432	281.374	274.985	123.603	143.075	171.501
AT1G12560	TCV = Mock = NES	0.991108	4.9432	0.0257477	0	0.89294	0	0	0	0	0.876615	0	0
AT1G12570	TCV < Mock < NES	1.11022e-16	-5.62489	-2.3808	0	0	42.7033	766.921	553.291	788.511	49.967	39.3646	133.204
AT1G12580	NES < TCV < Mock	0.000716686	-0.264221	0.229546	2252.96	1730.52	2002.31	2234.96	2644.68	2309.21	1700.63	1697.98	1706.68
AT1G12600	TCV < Mock < NES	1.64423e-10	-2.66217	-1.41121	0.982109	3.57176	12.3365	35.1695	43.7431	28.1611	12.2726	14.3832	18.3156
AT1G12610	TCV < Mock < NES	3.91188e-11	-3.62222	-1.25865	28.4811	46.4329	37.0095	564.981	581.665	231.915	80.6486	126.421	60.7745
AT1G12615	TCV = Mock = NES	0.981712	5.07626	5.07626	0.982109	0	0	0	0	0	0	0	0
AT1G12620	TCV < Mock = NES	0	-0.675821	-0.872913	226.867	218.77	176.507	340.35	347.58	305.967	375.191	417.87	346.331
AT1G12630	TCV = Mock = NES	0.998652	0.0623363	-0.145708	2.94633	3.57176	4.74481	2.269	3.54674	4.9696	7.01292	3.78506	1.66506
AT1G12640	TCV > Mock = NES	0	1.4215	1.37944	3810.58	3017.25	3161.94	1253.62	1162.15	1313.63	1230.77	1253.61	1355.35
AT1G12650	TCV < Mock = NES	4.06447e-06	-0.803975	-0.996723	710.064	576.839	720.262	1051.68	1356.04	1096.63	1542.84	1454.22	1008.19
AT1G12665	TCV = Mock = NES	0.980936	0	-4.71335	0	0	0	0	0	0	0	0.757011	0
AT1G12672	TCV = NES < Mock	6.68463e-05	-1.4464	1.06121	7.85687	12.5012	5.69377	14.7485	24.8272	31.4742	2.62984	1.51402	8.32528
AT1G12680	TCV > NES > Mock	0	0.510074	0.848675	1015.5	1109.03	957.502	779.401	693.978	690.775	575.059	517.796	618.568
AT1G12700	TCV < Mock = NES	1.45748e-09	-0.928133	-0.780022	126.692	175.909	155.63	288.163	303.837	279.954	308.568	262.683	215.625
AT1G12710	TCV < Mock = NES	5.9263e-07	-0.726571	-0.897449	171.869	210.734	247.679	289.297	367.678	385.973	333.99	383.048	457.058
AT1G12730	TCV = Mock = NES	0.948599	0.0518149	-0.0286138	191.511	127.69	171.762	148.619	156.056	168.967	175.323	150.645	174.831
AT1G12740	TCV = Mock = NES	0.992756	-2.81514	-2.37605	0	0	0.948961	0	3.54674	3.31307	2.62984	0.757011	1.66506
AT1G12750	TCV < Mock < NES	0	-2.56216	-1.40696	154.191	123.226	172.711	881.506	764.913	1012.14	390.97	398.945	403.776
AT1G12760	TCV > NES > Mock	0	0.890873	1.1519	3059.27	2843.12	2609.64	1508.88	1514.46	1567.08	1439.4	1182.45	1208.83
AT1G12770	TCV = Mock = NES	0.869096	-0.437474	-0.220628	736.581	1516.21	964.145	1519.09	1421.06	1416.34	1383.3	1377	988.21
AT1G12775	TCV = Mock = NES	0.643937	1.38468	0.736141	223.921	848.684	382.43	213.285	174.972	168.967	278.371	322.901	272.237
AT1G12780	TCV > Mock > NES	0	2.62928	1.70798	7162.52	5472.83	5447.99	1068.7	1027.37	826.611	2145.08	1436.05	1953.94
AT1G12790	TCV = Mock < NES	2.83568e-09	0.153959	-0.959437	109.996	142.87	89.2024	90.7599	104.038	112.644	248.959	233.917	182.324
AT1G12800	TCV < Mock < NES	0	-2.85402	-1.66293	1800.2	1862.67	1996.61	12950.3	14489.6	13479.2	6075.82	6172.67	5672.84
AT1G12810	TCV > Mock = NES	0	2.04664	1.92135	1694.14	1515.32	1515.49	407.285	398.417	337.933	420.775	334.599	492.024
AT1G12820	TCV > NES > Mock	2.66454e-15	0.417522	0.778457	2210.73	1972.51	1786.89	1514.56	1325.3	1630.03	1167.65	1125.68	1187.18
AT1G12830	TCV = Mock < NES	0.00496058	-0.19218	-1.0213	487.126	448.5	563.683	534.637	664.785	513.526	1249.03	1097.98	696.235
AT1G12840	TCV < Mock = NES	1.11022e-16	-0.402211	-0.415134	3746.74	3790.29	3769.27	4966.55	4723.89	5251.22	4675.14	5058.04	5342.92
AT1G12845	TCV = NES < Mock	1.5571e-08	-1.11995	-0.00381021	27.499	60.7199	56.9377	112.315	92.2151	110.988	46.4606	41.6356	57.4444
AT1G12850	Mock < TCV < NES	3.48431e-05	0.257273	-0.157086	1742.26	1460.85	1757.48	1299	1423.42	1427.93	1783.91	1826.67	1920.64
AT1G12855	TCV = Mock = NES	0.739155	0.313813	0.839201	2.94633	0	0	0	2.36449	0	0.876615	0.757011	0
AT1G12860	TCV < Mock < NES	0	-2.96979	-1.46668	238.652	155.372	222.057	1681.33	1838.39	1307.01	562.787	631.347	508.674
AT1G12870	TCV = Mock = NES	0.988067	0.687814	2.90235	0	3.57176	2.84688	1.1345	1.18225	1.65653	0	0	0.832528
AT1G12880	TCV = NES < Mock	1.09319e-06	-0.792856	-0.124403	273.026	285.741	234.393	532.08	444.524	397.568	264.738	254.356	345.499
AT1G12890	TCV = Mock = NES	0.361804	-0.795448	1.24454	5.89265	10.7153	10.4386	13.614	20.0982	13.2523	0.876615	3.02805	7.49275
AT1G12900	TCV < Mock < NES	0	-4.15779	-1.95797	4452.88	4420.05	5476.46	80770.7	92884.3	82470.6	17929.4	18357.5	19462.8
AT1G12910	Mock < TCV < NES	0	1.81507	-0.759394	2045.73	1859.99	1821.06	577.46	549.744	500.274	3352.17	3348.26	2993.77
AT1G12920	TCV < Mock = NES	2.70168e-06	-0.717876	-1.37217	2119.39	2021.62	2305.98	3162.98	4117.76	3323.01	5966.24	6623.09	4099.37
AT1G12930	TCV = Mock < NES	0	-0.00503751	-0.865211	834.792	942.945	858.81	881.506	780.282	983.982	1605.96	1636.66	1560.16
AT1G12940	TCV > Mock > NES	1.05693e-13	5.94057	2.61377	593.194	729.532	1206.13	22.69	3.54674	14.9088	78.0187	204.393	130.707
AT1G12950	TCV = Mock = NES	0.690256	0.376	2.11349	5.89265	10.7153	11.3875	10.2105	4.72898	6.62614	1.75323	3.02805	1.66506
AT1G12970	TCV > Mock > NES	0	1.81736	0.737739	581.408	587.555	601.641	179.251	169.061	154.058	377.821	345.954	338.006
AT1G12980	TCV = Mock = NES	0.864686	-6.2599	-4.91746	0	0	0	2.269	0	0	0.876615	0	0
AT1G12990	TCV = Mock > NES	0.0362221	-0.193364	0.289275	1671.55	1636.76	1432.93	1763.01	1509.73	2148.53	1261.45	1317.96	1300.41
AT1G13000	TCV > Mock > NES	0	1.06011	0.736824	1246.3	1223.33	1047.65	600.15	545.015	541.687	696.032	633.618	780.911
AT1G13020	NES < TCV < Mock	0	-0.496349	0.233699	1510.48	1550.14	1460.45	1927.51	2314.84	2135.27	1215.86	1218.79	1410.3
AT1G13030	TCV < NES < Mock	5.86438e-08	-0.387543	-0.993162	194.457	216.984	245.781	257.531	323.935	278.298	465.482	489.786	352.992
AT1G13040	TCV = Mock < NES	6.13892e-07	0.479239	-1.99055	84.4613	93.7587	109.131	64.6665	68.5702	72.8875	467.236	446.637	228.113
AT1G13050	TCV > Mock = NES	0.40254	0.63918	0.424197	65.8013	79.4717	96.794	55.5905	48.4721	51.3526	66.6227	77.9722	35.7987
AT1G13060	TCV > Mock = NES	0	0.953659	0.780285	3725.14	3485.15	3562.4	1823.14	1997.99	1741.02	1989.92	1878.15	2404.34
AT1G13080	NES < TCV < Mock	0	-0.751786	0.78343	2421.88	2395.76	1928.29	3392.15	3718.16	4249.01	1219.37	1385.33	1314.56
AT1G13090	TCV > Mock > NES	0	1.13992	0.755926	4616.89	4692.4	3910.67	1975.16	1845.49	2178.34	2417.7	2502.68	2908.02
AT1G13100	TCV = Mock = NES	0.943311	-0.0321479	-0.039879	397.754	361.641	435.573	376.654	358.22	487.021	426.035	435.282	367.145
AT1G13110	TCV > Mock = NES	3.33653e-05	0.576987	0.488899	3256.67	2929.74	3035.73	1908.23	1878.59	2395.35	2557.96	2246.81	1766.62
AT1G13120	TCV = NES > Mock	0.000330413	0.390134	-0.00695761	962.466	917.943	952.757	738.559	717.623	705.684	1064.21	949.292	833.36
AT1G13130	TCV = Mock = NES	0.840714	-1.89755	-0.356348	1.96422	2.67882	1.89792	9.07599	7.09347	8.28267	2.62984	0.757011	4.99517
AT1G13140	TCV = Mock = NES	0.975167	7.56428	1.70701	1.96422	1.78588	1.89792	0	0	0	0.876615	0	0.832528
AT1G13143	TCV = Mock < NES	0	1.1304	-1.86142	15.7137	8.9294	13.2855	4.538	9.45796	3.31307	46.4606	51.4768	39.9613
AT1G13150	TCV = Mock = NES	0.973468	6.61627	6.61627	1.96422	0	0.948961	0	0	0	0	0	0
AT1G13160	TCV < Mock = NES	0.00864708	-0.739032	-1.5417	808.275	646.489	875.891	1127.69	1488.45	1273.88	2751.69	2735.84	1297.91
AT1G13170	TCV < Mock < NES	1.11022e-16	-3.39092	-2.38084	102.139	64.2917	220.159	1252.49	1444.7	1358.36	556.65	650.273	806.719
AT1G13180	TCV > Mock = NES	2.04281e-14	0.586977	0.465397	406.593	354.497	379.585	265.473	255.365	238.541	254.218	275.552	296.38
AT1G13190	TCV > Mock = NES	2.79746e-05	0.786312	1.04104	1790.38	2877.05	2073.48	1354.59	1359.58	1194.36	1117.68	1123.4	1034.83
AT1G13195	TCV = Mock = NES	0.931696	0.061632	-0.0704445	605.961	608.985	439.369	555.905	510.73	518.495	641.682	510.983	584.434
AT1G13200	TCV > Mock = NES	5.07865e-07	8.81705	9.1782	54.016	340.21	130.957	1.1345	0	0	0.876615	0	0
AT1G13210	TCV > Mock > NES	0	2.01671	1.38349	5481.15	5151.37	4373.76	1608.72	741.268	1358.36	2539.55	1699.49	1512.7
AT1G13220	TCV < Mock < NES	1.11022e-16	-1.32394	-0.62576	522.482	496.475	518.133	1281.98	1201.16	1364.98	868.725	864.507	638.549
AT1G13230	TCV > Mock = NES	0.287861	0.497805	1.2962	10.8032	33.0388	16.1323	19.2865	16.5514	6.62614	9.64276	10.5982	4.16264
AT1G13245	TCV > Mock > NES	1.02585e-13	1.71346	0.884979	1765.83	1334.05	1521.18	395.94	509.548	503.587	1071.22	735.058	695.993
AT1G13250	TCV < Mock < NES	0	-3.93844	-2.07008	26.5169	4.4647	82.5596	523.004	638.413	579.787	125.356	148.374	203.137
AT1G13260	TCV = Mock > NES	8.48377e-12	0.275149	1.57443	2374.74	1681.41	2418.9	1565.61	2304.2	1480.94	646.942	847.853	679.342
AT1G13270	TCV = Mock = NES	0.838318	-0.221754	-0.267958	354.541	641.131	458.348	654.606	572.207	468.799	579.442	626.048	545.306
AT1G13280	TCV = NES < Mock	7.01829e-06	-0.66144	0.293359	487.126	637.559	635.804	1034.66	754.273	995.577	404.119	449.665	582.769
AT1G13300	TCV > Mock = NES	0.241569	7.22712	7.22712	0	4.4647	0	0	0	0	0	0	0
AT1G13310	TCV = NES > Mock	3.4037e-06	8.29716	1.51206	315.257	1275.12	561.785	1.1345	2.36449	3.31307	424.282	252.842	77.4251
AT1G13320	TCV > Mock = NES	0.0268402	0.213476	0.457167	2229.39	3010.1	2306.92	2122.65	2243.9	2141.9	1813.72	1801.69	1881.51
AT1G13330	TCV < NES < Mock	2.12272e-09	-1.71476	-2.58262	16.6958	14.287	4.74481	32.9005	49.6543	34.7872	85.0316	82.5142	46.6215
AT1G13340	TCV > Mock > NES	0	4.04386	1.97802	12486.5	10926.9	8352.76	832.722	718.805	374.377	2932.28	2976.57	2154.58
AT1G13350	TCV > Mock = NES	0.328133	2.01059	2.65617	3035.7	13729	5526.75	1904.82	1785.19	1842.07	1251.81	1184.72	1099.77
AT1G13360	TCV > Mock > NES	0	3.11839	2.05738	18227	13624.5	14774.4	2202.06	1260.27	1906.67	4107.82	3053.03	4041.09
AT1G13370	TCV = Mock < NES	0.243526	-0.158316	-1.42824	5.89265	8.9294	7.59169	12.4795	5.91123	6.62614	21.9154	31.7945	6.66022
AT1G13380	TCV < NES < Mock	0	-1.07439	-1.35872	338.827	254.488	359.656	639.858	734.174	632.796	842.427	853.152	748.442
AT1G13390	TCV > Mock = NES	0	1.51335	1.21634	2687.05	2224.31	2427.44	1013.11	828.754	728.875	1021.26	959.133	1178.03
AT1G13400	TCV = Mock = NES	0.701509	7.29731	0.556257	0	0.89294	3.79585	0	0	0	0	1.51402	1.66506
AT1G13410	TCV = Mock < NES	8.74217e-06	-0.0948109	-1.15376	30.4454	49.1117	47.4481	58.994	40.1963	36.4438	109.577	101.44	71.5974
AT1G13420	TCV < Mock = NES	7.56133e-06	-4.25242	-4.21116	0.982109	0	1.89792	14.7485	22.4627	18.2219	13.1492	9.08414	31.636
AT1G13430	TCV < Mock = NES	0.0107955	-3.55586	-2.63401	0	2.67882	4.74481	9.07599	18.9159	59.6353	14.9025	11.3552	19.9807
AT1G13440	NES < TCV < Mock	1.37908e-05	-0.228219	0.242778	26190.9	29631.3	27350	28968.3	33283.8	35174.9	23349.5	22446.9	24493.8
AT1G13450	Mock < TCV < NES	0	0.416391	-1.21591	1203.08	1216.18	1135.91	965.459	853.581	844.833	2742.05	2805.48	2710.71
AT1G13460	TCV < NES < Mock	0	-0.485371	-0.805388	816.132	996.521	785.74	1246.81	1179.88	1210.93	1497.26	1526.89	1516.87
AT1G13470	TCV > Mock > NES	0	4.91422	1.15968	4420.47	2598.46	2787.1	153.157	21.2804	150.745	1343.85	1543.55	1501.88
AT1G13480	Mock < TCV < NES	0.0016828	6.97845	-3.80194	88.3898	116.082	85.4065	2.269	0	0	2781.5	827.413	434.579
AT1G13490	TCV > Mock > NES	0.00868905	11.0443	1.81609	5.89265	37.5035	19.9282	0	0	0	14.0258	2.27103	1.66506
AT1G13500	TCV > Mock = NES	5.03394e-11	6.58652	7.04787	35.3559	117.868	76.8659	0	2.36449	0	0.876615	0	0.832528
AT1G13510	TCV > Mock = NES	9.04487e-10	12.3801	7.66678	17.678	77.6858	64.5294	0	0	0	0	0.757011	0
AT1G13520	TCV > Mock > NES	2.9976e-15	17.9746	1.65194	3524.79	1966.25	2235.75	0	0	0	2134.56	138.533	185.654
AT1G13530	TCV > Mock > NES	0	14.9214	3.56874	232.76	413.431	284.688	0	0	0	43.8307	20.4393	14.153
AT1G13540	TCV > Mock > NES	1.35891e-13	5.93847	2.90815	145.352	264.31	146.14	4.538	1.18225	3.31307	35.9412	27.2524	10.8229
AT1G13550	TCV > Mock > NES	0	4.42582	2.42536	185.619	197.34	144.242	7.94149	8.27572	8.28267	51.7203	27.2524	19.1481
AT1G13560	TCV < NES < Mock	0	-0.146261	-0.663718	2572.14	2417.19	2583.07	2837.38	2836.21	2706.78	4056.97	3914.51	4024.44
AT1G13570	Mock < TCV < NES	0	0.290819	-1.02236	580.426	650.953	588.356	503.718	500.09	483.708	1139.6	1234.69	1322.05
AT1G13580	TCV < Mock = NES	6.72243e-09	-1.02521	-0.797058	277.937	212.52	249.577	542.291	524.917	438.982	347.139	420.898	517.832
AT1G13600	TCV < Mock = NES	6.91753e-05	-3.63138	-3.64552	0	0	2.84688	7.94149	9.45796	18.2219	7.88953	18.9253	9.1578
AT1G13605	TCV = Mock = NES	0.973468	6.61627	6.61627	1.96422	0	0.948961	0	0	0	0	0	0
AT1G13630	TCV < NES < Mock	1.74005e-06	-1.2164	-2.10653	68.7476	50.8976	91.1003	175.847	163.15	150.745	355.029	368.665	183.989
AT1G13635	TCV = NES < Mock	1.9984e-14	-4.79137	-0.37266	0	0	1.89792	13.614	16.5514	23.1915	0.876615	0.757011	0.832528
AT1G13640	TCV < NES < Mock	1.11022e-16	-0.299958	-1.89803	1654.85	1471.57	2016.54	1900.29	2213.16	2218.1	6273.06	6617.79	6277.26
AT1G13650	TCV < Mock < NES	0	-5.02778	-3.67977	85.4434	58.9341	68.3252	2523.13	2988.72	1427.93	872.232	1219.55	634.386
AT1G13670	TCV < Mock = NES	8.99084e-11	-2.66714	-2.36151	3.92843	0	13.2855	28.3625	41.3786	39.7568	20.1621	31.7945	36.6312
AT1G13680	TCV = Mock = NES	0.987943	-5.33658	-7.06256	0	0	0	0	1.18225	0	0.876615	2.27103	0.832528
AT1G13690	TCV > Mock > NES	0	0.828528	0.243367	642.299	582.197	603.539	335.812	360.585	332.964	563.663	510.226	470.378
AT1G13700	TCV > Mock > NES	0	4.94205	3.39914	380.076	238.415	382.431	19.2865	8.27572	4.9696	43.8307	31.0375	19.9807
AT1G13710	TCV = Mock = NES	0.984904	-5.33658	0	0	0	0	0	1.18225	0	0	0	0
AT1G13730	TCV < Mock < NES	2.65787e-13	-1.41908	-0.777707	740.51	562.552	789.536	1641.62	2274.64	1679.73	1311.42	1176.4	1099.77
AT1G13740	TCV < Mock = NES	7.46442e-05	-0.64795	-0.948955	433.11	359.855	377.687	557.039	689.249	588.07	928.335	747.17	584.434
AT1G13750	TCV > Mock > NES	4.44089e-16	2.52947	0.802268	855.417	1187.61	787.638	198.537	86.3039	205.41	479.508	560.945	582.769
AT1G13770	TCV = Mock = NES	0.886828	-0.148311	-0.20889	446.859	432.183	392.87	488.969	446.889	473.769	488.274	464.805	517
AT1G13780	TCV = Mock < NES	0.033484	-0.169729	-0.419134	284.811	391.108	301.77	343.753	386.594	369.407	470.742	435.282	401.278
AT1G13790	TCV = Mock = NES	0.476575	-0.489585	0.0157475	118.835	236.629	160.374	250.724	264.823	208.723	176.2	198.337	135.702
AT1G13800	TCV < Mock = NES	8.80965e-11	-1.85425	-2.47015	10.8032	18.7517	38.9074	68.0699	85.1217	94.4225	139.382	155.187	84.9178
AT1G13810	TCV < Mock = NES	0.00544797	-0.80927	-0.778973	132.585	126.798	170.813	216.689	300.29	236.884	306.815	257.384	173.998
AT1G13820	TCV < Mock < NES	0	-1.625	-0.653623	615.782	642.024	545.653	1890.08	1870.31	1802.31	964.276	922.04	950.746
AT1G13825	TCV > Mock = NES	0.027659	5.60977	6.1061	2.94633	96.4376	15.1834	1.1345	1.18225	0	0.876615	0.757011	0
AT1G13830	TCV > Mock > NES	0	6.231	3.10271	327.042	450.042	283.739	7.94149	1.18225	4.9696	28.9283	28.7664	65.7697
AT1G13860	TCV < Mock < NES	0	-1.56292	-0.982132	315.257	345.568	388.125	1038.07	936.338	1124.79	591.715	707.806	772.586
AT1G13870	TCV < Mock < NES	1.38679e-09	-0.654393	-0.399229	487.126	441.113	453.603	690.91	793.287	690.775	646.942	643.46	531.985
AT1G13880	TCV = Mock > NES	0	0.0798373	0.557186	1247.28	1096.53	1143.5	1129.96	1107.76	1061.84	867.849	797.89	704.318
AT1G13890	TCV > Mock = NES	5.15014e-07	14.5773	14.5773	61.8728	505.404	166.068	0	0	0	0	0	0
AT1G13900	NES < TCV < Mock	6.91151e-10	-0.210714	0.40801	1229.6	1204.58	1193.79	1420.39	1275.64	1502.48	830.154	841.797	1062.31
AT1G13910	TCV = NES < Mock	0.0122807	-0.694127	-0.185965	180.708	132.155	132.855	263.204	245.907	212.036	149.025	141.561	216.457
AT1G13920	TCV < Mock = NES	5.93454e-09	-1.17956	-1.01384	32.4096	65.1846	34.1626	106.643	104.038	87.7963	89.4147	98.4115	78.2576
AT1G13930	TCV = Mock > NES	1.11022e-16	0.297847	1.80896	4726.89	3382.46	3443.78	2929.28	3352.85	3115.94	1130.83	900.086	1266.27
AT1G13940	TCV = NES > Mock	1.24622e-08	0.452593	0.138236	1062.64	958.125	1013.49	772.594	705.8	738.815	844.18	962.918	949.914
AT1G13950	TCV = NES > Mock	0.0527328	1.04666	0.211721	592.211	629.523	469.736	241.648	312.113	265.046	402.366	374.721	683.505
AT1G13960	TCV > Mock = NES	1.11022e-16	1.09956	1.13762	1402.45	1259.05	1314.31	681.834	605.31	568.191	638.176	559.431	609.41
AT1G13970	TCV = Mock = NES	0.461932	0.671662	0.516987	228.831	378.607	232.496	216.689	146.598	163.997	163.927	157.458	265.576
AT1G13980	Mock < TCV < NES	0	0.839285	-1.50441	2500.45	2891.34	3237.86	1548.59	1470.71	1803.97	7964.05	8369.52	8149.61
AT1G13990	TCV > Mock > NES	0	6.23557	3.58964	4187.71	3683.38	3246.4	57.8595	44.9253	44.7264	276.134	212.72	434.579
AT1G14000	TCV > NES > Mock	0	0.376994	0.663581	3721.21	3845.65	3415.31	2828.31	2850.39	2778.01	2256.41	2249.08	2427.65
AT1G14010	TCV > NES > Mock	2.18714e-14	0.661903	1.00846	840.685	638.691	800.923	490.104	507.183	443.951	341.88	376.992	414.599
AT1G14020	TCV = NES < Mock	0.00129844	-0.752488	-0.25712	255.348	492.01	368.197	594.478	662.057	622.857	428.665	463.291	441.24
AT1G14030	TCV < Mock < NES	0	-2.1465	-1.73445	307.4	250.916	350.167	1278.58	1501.45	1242.4	1014.24	1093.88	914.948
AT1G14040	Mock < TCV < NES	0	0.513316	-1.73816	91.3361	161.622	126.212	105.508	92.2151	67.9179	436.554	449.665	378.8
AT1G14048	TCV > Mock = NES	4.93758e-05	9.58679	9.58679	2.94633	12.5012	7.59169	0	0	0	0	0	0
AT1G14060	TCV = Mock < NES	0.000560085	-0.442373	-2.04879	274.99	286.634	378.636	369.847	511.912	395.912	1584.04	1598.81	707.648
AT1G14080	TCV > Mock = NES	0	7.37447	6.02741	214.1	295.563	256.22	3.4035	1.18225	0	2.62984	0.757011	8.32528
AT1G14100	TCV < Mock < NES	1.25063e-06	-11.6766	-8.81213	0	0	0	55.5905	17.7337	24.848	2.62984	8.32712	2.49758
AT1G14120	TCV = NES > Mock	0.0506756	11.4658	1.21163	7.85687	58.9341	18.0303	0	0	0	0.876615	34.0655	1.66506
AT1G14130	TCV > NES > Mock	-2.22045e-16	1.24054	1.68382	767.027	712.566	637.702	367.578	235.267	293.207	208.634	208.935	241.433
AT1G14140	Mock < TCV < NES	0	0.547721	-1.57919	473.376	518.798	515.286	274.549	405.51	351.185	1491.12	1573.83	1439.44
AT1G14150	TCV < Mock < NES	0	-4.48879	-1.71521	110.978	108.046	131.906	2626.37	2682.51	2570.94	328.731	339.898	483.699
AT1G14160	TCV = Mock = NES	0.582022	-6.26061	0	0	0	0	2.27013	0	0	0	0	0
AT1G14170	TCV < NES < Mock	0	-0.611602	-1.92316	204.279	193.768	230.598	357.367	313.295	289.894	670.61	898.572	815.044
AT1G14180	TCV < Mock = NES	0	-3.18787	-2.9843	37.3201	20.5376	44.6012	271.145	379.501	283.267	305.062	327.786	178.161
AT1G14185	TCV = NES < Mock	4.12763e-06	-2.76366	-1.19971	0.982109	3.57176	5.69377	22.69	18.9159	28.1611	5.25969	8.32712	9.99033
AT1G14190	TCV < Mock < NES	0	-3.59137	-2.61442	8.83898	4.4647	14.2344	107.777	113.496	110.988	58.7332	56.7758	53.2818
AT1G14200	TCV > NES > Mock	0	2.02738	2.57417	2064.39	1677.83	1976.69	435.648	566.296	400.881	213.894	312.646	433.747
AT1G14205	TCV = Mock < NES	0.00158711	0.534655	-0.966038	29.4633	34.8247	45.5501	19.2865	36.6496	19.8784	92.0446	73.4301	49.1191
AT1G14210	TCV = NES < Mock	0.00124308	-0.327673	0.0143582	296.597	247.344	293.229	330.139	384.23	336.277	270.874	273.281	284.724
AT1G14220	TCV = Mock = NES	0.99568	0.0205971	1.88658	0.982109	0	1.89792	0	1.18225	1.65653	0	0.757011	0
AT1G14230	TCV = NES > Mock	3.65136e-06	0.794938	0.0714427	1087.08	1310.63	1054.19	713.147	669.731	606.673	996.869	1010.73	1277.52
AT1G14240	TCV > Mock = NES	0.0902374	1.96634	0.69066	20.6243	28.5741	22.7751	6.80699	8.27572	3.31307	10.5194	17.4113	16.6506
AT1G14250	TCV < Mock = NES	0.000233589	-4.80573	-3.89518	67.8794	79.6744	132.961	5266.8	983.048	1596.52	1290.22	1604.74	1279.17
AT1G14260	TCV > Mock = NES	0.00897454	2.74209	1.87067	300.525	90.187	158.477	34.035	16.5514	31.4742	50.8437	47.6917	51.6167
AT1G14270	TCV < Mock < NES	1.11022e-16	-1.5442	-0.407566	644.263	656.311	629.161	1868.52	1897.5	1861.95	795.09	821.357	943.254
AT1G14280	TCV < Mock < NES	0	-3.02237	-1.48372	989.965	780.43	831.29	6304.41	7497.8	7336.79	2725.4	2360.36	2190.38
AT1G14290	TCV < Mock < NES	0	-2.67858	-2.15185	255.348	239.308	289.433	1563.34	1904.6	1552.17	1105.41	1178.67	1200.5
AT1G14300	TCV = Mock < NES	0.00219	0.0547268	-1.10966	335.881	275.026	375.789	300.642	326.3	323.024	829.278	847.096	452.895
AT1G14310	TCV < Mock = NES	0.00460441	-0.30776	-0.258327	354.541	308.064	344.473	407.285	426.791	412.477	404.119	371.693	428.752
AT1G14315	TCV = Mock = NES	0.994775	6.99854	-0.121737	1.96422	0.89294	0.948961	0	0	0	2.62984	1.51402	0
AT1G14320	TCV = Mock = NES	0.977976	-0.079253	-0.136945	8538.88	7621.18	8007.79	7285.02	10286.8	7960.78	9986.66	9733.65	6854.04
AT1G14330	TCV > Mock = NES	1.80966e-14	1.21598	1.25297	1724.58	1213.51	1486.07	637.589	682.156	584.757	564.54	554.132	737.619
AT1G14340	TCV > Mock = NES	0	1.56411	1.63258	1181.48	1082.24	831.29	385.73	301.473	359.468	319.964	270.253	407.938
AT1G14345	TCV = NES < Mock	0	-2.40009	-0.340623	1100.94	1182.25	1189.05	5269.75	7763.81	5294.29	1388.56	1314.17	1694.19
AT1G14350	TCV < Mock < NES	0	-3.83653	-2.90473	62.8549	56.2552	171.762	1074.37	1378.5	1702.92	601.358	672.983	904.125
AT1G14360	TCV > Mock > NES	0.000485228	1.54624	0.583527	1036.12	1259.05	1426.29	390.268	484.721	399.225	583.825	711.591	1188.02
AT1G14370	TCV > Mock = NES	0	2.65973	2.30631	3415.77	2208.24	2519.49	524.139	365.314	399.225	594.345	553.375	498.684
AT1G14380	TCV < Mock < NES	0	-1.38592	-0.723858	505.786	308.064	475.43	1044.87	1171.61	1152.95	632.039	713.105	784.241
AT1G14390	TCV < Mock < NES	4.0539e-11	-2.99933	-1.84449	4.91054	8.03646	6.64273	44.2455	41.3786	71.231	15.7791	28.0094	26.6409
AT1G14400	TCV > Mock = NES	1.11022e-16	1.64744	1.34525	7669.29	6072.89	6284.02	2120.38	2135.14	2136.93	2534.29	2433.03	2914.68
AT1G14410	TCV = Mock = NES	0.878178	-0.192318	-0.267716	580.426	741.14	596.897	621.706	920.969	649.362	611.877	757.011	940.756
AT1G14420	TCV = NES < Mock	0.0946081	-3.58025	0.182681	0	0	0.948961	3.4035	8.27572	0	0	0	0.832528
AT1G14430	TCV < Mock < NES	0	-4.43326	-1.21151	11.7853	2.67882	29.4178	297.239	358.22	293.207	33.3114	32.5515	35.7987
AT1G14440	TCV < Mock < NES	0	-4.75784	-2.99144	16.6958	2.67882	28.4688	458.338	465.805	371.064	112.207	146.103	122.382
AT1G14450	TCV > NES > Mock	0	0.898712	1.27918	1309.15	1500.11	1336.14	754.44	698.707	770.289	558.4	518.553	631.056
AT1G14453	TCV > Mock = NES	0.0140302	4.07019	1.9589	6.87476	9.84735	2.84688	1.13677	0	0	1.75674	0.757011	2.49758
AT1G14455	TCV = Mock = NES	0.831665	0.770445	0.230509	0	0	2.84688	0	0	1.65653	0	0.757011	1.66506
AT1G14460	TCV < Mock = NES	0	-1.87319	-1.50539	472.394	413.431	570.326	1708.56	1581.84	2044.16	1207.98	1345.97	1580.14
AT1G14470	Mock < TCV < NES	1.03806e-13	0.65219	-2.04793	34.3738	51.7905	28.4688	31.766	13.0047	28.1611	195.485	161.243	117.386
AT1G14480	TCV = NES > Mock	0.00366713	0.597415	0.0274796	412.486	289.313	385.278	237.11	249.454	231.915	396.23	340.655	329.681
AT1G14490	TCV > Mock = NES	6.92146e-06	1.32059	1.64749	29.4633	48.2188	48.397	26.0935	9.45796	14.9088	9.64276	18.9253	11.6554
AT1G14500	TCV > Mock = NES	0.0499052	8.38853	8.38853	0.982109	7.14352	1.89792	0	0	0	0	0	0
AT1G14510	TCV > Mock = NES	2.53659e-09	0.403337	0.334245	1758.96	1640.33	1778.35	1221.86	1483.72	1209.27	1376.29	1336.12	1394.48
AT1G14520	TCV = NES > Mock	1.69431e-09	3.51529	-0.256468	271.062	531.299	270.454	24.959	30.7384	38.1003	374.315	319.459	587.764
AT1G14530	NES < TCV < Mock	8.88178e-14	-0.734523	0.494713	297.579	274.133	297.025	574.057	478.809	392.599	181.459	195.309	239.768
AT1G14540	TCV = Mock = NES	0.78098	1.8128	-0.729012	192.493	139.299	94.8961	70.3389	29.5561	21.535	611.877	78.7292	16.6506
AT1G14550	TCV > Mock = NES	0.324981	6.5834	6.5834	0	0	2.84688	0	0	0	0	0	0
AT1G14560	TCV > Mock = NES	1.8041e-11	0.489629	0.484402	850.506	959.911	884.432	635.32	664.422	619.544	576.813	626.805	722.634
AT1G14570	TCV > Mock = NES	0	1.54558	1.43104	3174.17	3351.21	3164.79	1085.72	1125.5	1108.22	1099.27	1124.92	1369.51
AT1G14580	TCV > NES > Mock	0	0.677004	1.70118	808.275	800.967	836.035	446.993	563.931	518.495	251.588	224.832	275.567
AT1G14590	TCV = Mock < NES	3.94277e-06	0.138822	-0.991644	284.811	608.092	391.921	415.227	405.51	346.216	895.024	945.507	714.309
AT1G14600	TCV < Mock < NES	0.000375935	-0.946382	-0.5181	132.585	197.34	107.233	304.046	251.818	286.581	192.855	247.543	185.654
AT1G14610	TCV < Mock = NES	0.000406757	-0.522379	-0.986717	3252.74	2594.88	3230.26	4035.41	4376.67	4626.7	6967.33	6582.21	4439.87
AT1G14620	TCV < NES < Mock	1.86069e-05	-0.616107	-1.36738	210.171	163.408	267.607	290.432	375.954	316.398	635.546	628.319	390.455
AT1G14630	TCV < Mock < NES	0	-3.26219	-2.09584	5.89265	16.0729	12.3365	120.257	106.402	102.705	42.9541	61.3179	42.4589
AT1G14640	TCV > Mock > NES	1.91441e-10	1.95085	0.969738	465.519	305.632	447.517	114.584	69.7525	130.866	239.316	219.533	163.387
AT1G14642	TCV = Mock = NES	0.996847	0.123512	1.16299	0	2.67882	4.74481	1.1345	2.36449	3.31307	0.876615	0.757011	1.66506
AT1G14650	TCV = NES > Mock	0	0.575073	0.000129905	3115.25	3119.68	3024.73	2046.64	2094.94	2073.98	3293.44	3082.55	2882.83
AT1G14660	TCV = NES > Mock	0.000499323	0.662914	-0.0731271	387.933	259.846	280.893	186.058	195.07	205.41	343.633	336.113	297.212
AT1G14670	TCV = Mock < NES	1.44329e-15	-0.186012	-1.03937	3239.98	4091.45	3971.4	4068.31	4330.56	4459.39	6598.28	7922.12	8710.74
AT1G14680	TCV = NES > Mock	0.081011	2.09701	0.0365628	103.121	321.459	144.242	44.2455	63.8413	24.848	249.835	208.178	96.5732
AT1G14685	TCV = NES > Mock	0.0244295	0.31762	-0.203415	572.569	656.311	743.037	521.87	614.768	445.608	694.279	815.301	760.93
AT1G14686	TCV = Mock = NES	0.591631	-2.49057	-0.927979	1.96422	0	0.948961	1.1345	7.09347	8.28267	0.876615	3.02805	1.66506
AT1G14687	TCV = NES < Mock	0.398542	-1.01158	0.334774	6.87476	9.82234	16.1323	17.0175	26.0094	23.1915	8.76615	10.5982	6.66022
AT1G14688	TCV > Mock = NES	0.0112655	6.15762	3.46724	9.82109	57.1482	16.1323	1.1345	0	0	4.38307	2.27103	0.832528
AT1G14690	TCV < Mock = NES	1.11022e-16	-0.641015	-0.68311	963.448	899.191	935.676	1412.45	1574.75	1376.58	1535.83	1451.95	1505.21
AT1G14700	TCV < Mock = NES	3.14193e-14	-3.73395	-3.01384	50.0875	31.2529	67.3762	503.718	963.53	511.869	502.3	419.384	279.729
AT1G14710	TCV < Mock = NES	0.0075382	-0.749046	-0.345567	1145.14	927.765	1227.01	1600.78	2313.65	1631.69	1347.36	1492.83	1352.86
AT1G14720	TCV < Mock = NES	0.0850328	-0.38954	-0.698118	810.24	680.421	645.294	882.64	1138.5	776.915	1320.18	1296	849.178
AT1G14730	TCV = Mock = NES	0.467234	-0.98806	-0.138297	22.5885	23.2164	39.8564	58.994	49.6543	61.2918	65.7461	14.3832	14.153
AT1G14740	TCV = NES > Mock	0	1.82019	0.0811656	7873.56	5374.61	6110.36	1856.04	1916.42	1709.54	6586.88	6520.14	5192.47
AT1G14750	TCV = Mock = NES	0.996759	-0.763839	-0.456406	8.83898	5.35764	12.3365	13.614	16.5514	14.9088	12.2726	8.32712	15.818
AT1G14755	TCV = Mock = NES	0.988447	0	-6.40386	0	0	0	0	0	0	1.75323	0.757011	0
AT1G14760	TCV = Mock = NES	0.992834	5.02822	-1.78461	0	0	0.948961	0	0	0	1.75323	0.757011	0.832528
AT1G14770	TCV = Mock < NES	0	-0.00424326	-0.557157	256.33	235.736	221.108	234.841	235.267	245.167	338.373	358.823	352.159
AT1G14780	TCV > Mock > NES	0	4.50192	3.12427	384.004	311.636	229.649	24.959	5.91123	9.93921	49.0904	37.8506	19.1481
AT1G14790	TCV > Mock > NES	4.72805e-09	1.30148	0.487779	2274.56	2259.14	2056.4	842.933	548.562	1282.16	1461.32	1321.74	1916.48
AT1G14800	TCV = Mock = NES	0.492231	6.00594	6.00594	0	0	1.89792	0	0	0	0	0	0
AT1G14810	TCV < Mock = NES	1.5865e-11	-1.3433	-1.13964	642.299	671.491	663.324	1570.15	2058.29	1388.18	1602.45	1597.29	1156.38
AT1G14820	TCV < Mock = NES	0	-0.791269	-0.657556	308.382	339.317	326.443	600.15	588.758	496.96	475.125	517.039	544.473
AT1G14830	TCV = Mock > NES	0.00145206	-0.00533395	0.453231	2854.99	2384.15	2990.18	2580.99	2844.48	2834.33	1695.37	1982.61	2332.74
AT1G14840	TCV < Mock < NES	0	-3.13788	-1.52491	302.489	207.162	347.32	2363.16	2587.94	2592.48	763.531	800.161	902.46
AT1G14850	Mock < TCV < NES	0.0228037	0.284238	-0.288068	918.271	868.831	1093.2	747.635	716.441	901.155	1257.94	1274.05	984.88
AT1G14860	TCV > Mock = NES	0	4.91365	3.56997	138.477	75.8999	118.62	2.269	7.09347	1.65653	6.1363	14.3832	7.49275
AT1G14870	TCV > Mock > NES	0	5.75762	3.61944	6089.07	3000.28	4192.51	140.678	56.7478	48.0395	568.046	336.113	176.496
AT1G14880	TCV > Mock > NES	0.000208014	7.70125	2.85438	7009.31	18284.7	5376.81	68.0699	4.72898	74.5441	463.729	1183.97	2593.32
AT1G14890	TCV > Mock = NES	0	2.35505	2.60265	451.77	447.363	511.49	80.5494	104.038	91.1094	84.155	93.1124	54.9468
AT1G14900	TCV > Mock = NES	1.11022e-16	1.58301	1.75979	267.134	372.356	324.545	93.0289	127.683	101.049	92.9212	89.3273	102.401
AT1G14910	TCV > Mock = NES	0	1.05884	1.09758	1685.3	1593.01	1615.13	709.062	702.254	937.599	707.428	785.021	794.231
AT1G14920	TCV < Mock = NES	2.22045e-16	-1.30357	-1.28965	683.548	545.587	615.876	1237.74	1535.74	1780.77	1742.71	1480.71	1287.09
AT1G14930	TCV = Mock = NES	0.678801	0	-6.82621	0	0	0	0	0	0	0.876615	0	2.49758
AT1G14960	TCV = Mock = NES	0.981639	5.98872	5.98872	0.982109	0.89294	0	0	0	0	0	0	0
AT1G14970	TCV = Mock > NES	0.063683	0.086005	1.54931	90.354	404.502	229.649	224.631	245.907	212.036	71.0058	99.9255	76.5925
AT1G14980	TCV = Mock = NES	0.852777	-0.309277	0.100423	1353.35	1107.25	1569.58	1229.8	1898.69	1865.26	1364.01	1302.06	1093.11
AT1G14990	TCV > Mock = NES	0	0.94985	0.661614	292.668	327.709	309.361	146.35	172.608	162.34	192.855	189.253	205.634
AT1G15000	TCV < NES < Mock	8.23785e-14	-0.787581	-1.38559	197.404	156.265	239.138	246.186	313.295	463.83	526.845	536.721	485.364
AT1G15010	TCV > NES > Mock	8.87401e-13	2.39586	4.62709	1997.61	984.913	1148.24	282.49	325.117	177.249	48.2138	84.7853	34.1336
AT1G15015	TCV > Mock = NES	0.00701338	8.64873	8.64873	1.96422	6.25058	3.79585	0	0	0	0	0	0
AT1G15020	Mock < TCV < NES	0	1.60018	-1.00719	1017.46	1085.82	1096.05	344.888	364.132	346.216	2113.52	2240	2077.16
AT1G15030	TCV < Mock < NES	0	-1.44523	-0.527906	938.896	793.824	848.371	2330.26	2435.43	2262.83	1081.74	1295.25	1344.53
AT1G15040	TCV > Mock > NES	0	13.9798	5.00689	94.2824	206.269	184.098	0	0	0	2.62984	9.08414	3.33011
AT1G15050	TCV > Mock = NES	3.22775e-05	4.62251	5.57088	59.8811	264.552	111.977	6.80699	5.91123	4.9696	4.38307	2.27103	2.49758
AT1G15060	TCV > NES > Mock	1.55431e-14	0.414989	0.731375	1942.64	2024.05	1760.32	1411.32	1341.85	1542.23	1148.37	992.442	1308.73
AT1G15080	TCV = NES < Mock	1.7657e-12	-1.34864	-0.199306	24.5527	41.0753	33.2136	76.0114	86.3039	89.4529	41.2009	43.1496	29.1385
AT1G15100	TCV > Mock > NES	2.70023e-11	1.72202	0.645233	1822.79	1402.81	1459.5	444.724	331.029	644.392	1256.19	815.301	924.106
AT1G15110	TCV > Mock = NES	1.11022e-16	1.1378	1.4002	991.93	786.68	849.32	391.402	393.688	409.164	326.977	315.674	352.992
AT1G15120	TCV = Mock = NES	0.813538	-0.206567	0.00145814	1863.06	2114.48	1996.61	2270.13	2460.25	2163.43	1828.62	1817.58	2321.92
AT1G15125	TCV > Mock > NES	2.47855e-08	4.02853	1.81524	847.56	1448.35	752.526	86.2219	34.2851	66.2614	344.51	378.506	143.195
AT1G15130	TCV > Mock > NES	0	1.74628	0.649375	5818.01	5976.45	5583.69	1749.4	1648.05	1782.43	3660.74	3386.87	4031.93
AT1G15140	NES < TCV < Mock	1.11022e-16	-0.68647	0.543479	1423.08	1303.69	1243.14	2001.26	2524.09	1863.6	811.745	870.563	1041.49
AT1G15150	TCV = Mock < NES	0.24473	0.104369	-1.14151	0	13.3941	6.64273	6.80699	3.54674	8.28267	15.7791	15.1402	13.3204
AT1G15160	TCV > Mock = NES	0.0523679	3.84129	4.26041	2.94633	12.5012	1.89792	0	1.18225	0	0.876615	0	0
AT1G15165	TCV = NES < Mock	1.30154e-07	-1.17636	-0.52738	38.3022	59.827	38.9074	103.239	100.491	106.018	76.2655	61.3179	59.942
AT1G15170	TCV = Mock < NES	1.51752e-09	0.0237763	-0.746111	180.035	170.568	159.014	193.833	135.972	171.481	325.656	257.077	272.05
AT1G15180	TCV < NES < Mock	0	-1.95866	-2.98774	344.411	239.292	419.853	1229.97	1321.74	1349.22	2798.6	3063.94	2098.15
AT1G15190	TCV > NES > Mock	0.172979	0.433367	2.34869	3.92843	16.0729	5.69377	3.4035	2.36449	13.2523	3.50646	1.51402	0
AT1G15200	TCV = Mock = NES	0.948774	-0.123815	-0.0485636	1592.98	1320.66	1523.08	1472.58	1794.65	1567.08	1775.14	1607.14	1206.33
AT1G15210	TCV > Mock = NES	0.00041004	8.85409	8.85409	1.96422	7.14352	4.74481	0	0	0	0	0	0
AT1G15215	TCV = Mock = NES	0.616687	-0.177749	-0.426914	114.907	94.6517	97.743	114.584	100.491	132.523	125.356	111.281	176.496
AT1G15220	TCV > Mock = NES	3.49906e-05	0.912828	1.07882	219.992	362.534	258.117	136.14	159.603	150.745	162.174	123.393	112.391
AT1G15230	TCV = NES > Mock	2.36411e-12	1.85824	0.30136	1157.91	1242.08	1075.17	327.87	360.585	270.015	1170.28	996.227	653.534
AT1G15240	TCV > Mock = NES	4.97269e-13	0.797556	0.779191	2669.37	2060.91	2296.49	1348.92	1168.06	1525.67	1360.51	1294.49	1439.44
AT1G15250	TCV = Mock = NES	0.667143	-0.0406072	-0.715887	329.988	378.607	406.155	310.853	423.244	412.477	828.401	673.74	328.848
AT1G15260	TCV < Mock < NES	-2.22045e-16	-3.15716	-2.05868	220.974	165.194	233.444	1549.73	1885.68	2092.2	975.672	869.806	735.954
AT1G15270	TCV = Mock > NES	2.53579e-07	0.219995	0.657721	4773.05	4876.35	4290.25	3848.22	4435.78	3684.13	2714.88	2574.6	3546.57
AT1G15280	TCV > Mock = NES	8.8996e-08	0.475376	0.385887	3261.58	2952.06	2880.1	2094.29	2211.98	2234.67	2600.04	2283.15	2076.32
AT1G15290	TCV < Mock = NES	1.11022e-16	-1.08009	-0.84487	5522.4	5422.83	6331.47	13135.2	10986.6	12404.1	10197.7	11209.1	9624.02
AT1G15310	TCV > Mock > NES	0	4.79202	3.32556	556.856	667.919	472.583	28.3625	21.2804	11.5957	63.9929	54.5048	50.7842
AT1G15320	TCV > Mock = NES	9.40796e-10	8.63923	5.68105	76.6045	263.417	143.293	0	1.18225	0	6.1363	0.757011	2.49758
AT1G15330	TCV = Mock = NES	0.969885	2.05563	7.33423	1.96422	0	2.84688	1.1345	0	0	0	0	0
AT1G15340	TCV > Mock = NES	0	0.579269	0.789282	4999.91	4137.89	4413.62	3032.52	2957.98	3079.5	2841.99	2537.5	2461.78
AT1G15350	TCV > Mock > NES	0	1.66504	0.853818	768.991	766.143	677.558	235.976	228.173	233.571	391.847	392.889	439.575
AT1G15370	TCV = Mock > NES	1.34391e-06	0.173215	0.542973	1281.65	1234.94	1106.49	1014.24	1125.5	1073.43	766.161	745.656	974.89
AT1G15380	TCV > Mock = NES	2.88658e-15	11.7025	9.0916	2215.64	697.386	967.94	1.1345	0	0	0.876615	4.54207	1.66506
AT1G15385	TCV > Mock = NES	0.0293759	9.0909	3.23363	10.8032	2.67882	2.84688	0	0	0	0.876615	0	0.832528
AT1G15390	TCV < NES < Mock	4.44089e-16	-0.683406	-1.60115	453.734	401.823	485.868	631.916	871.315	651.018	1492	1482.99	1094.77
AT1G15400	TCV > Mock > NES	0	2.41177	1.8668	1828.69	1433.17	1518.34	264.338	310.931	323.024	487.398	352.01	471.211
AT1G15410	TCV < Mock < NES	-2.22045e-16	-3.10839	-1.56816	412.486	238.672	331.187	2727.34	2320.75	3424.06	852.946	864.507	1195.51
AT1G15415	TCV = NES > Mock	0.193593	1.50317	-0.332556	27.499	107.789	36.0605	30.6315	24.8272	4.9696	88.5381	59.8039	67.4347
AT1G15420	TCV = Mock < NES	0.0303214	-0.427038	-1.69394	396.772	282.169	466.889	461.741	651.417	427.386	1593.69	1487.53	626.061
AT1G15430	TCV > Mock = NES	2.62454e-10	0.747133	0.99813	1003.71	746.498	838.882	578.595	475.263	488.678	513.696	409.543	372.972
AT1G15440	TCV = Mock < NES	0.0797977	0.204545	-1.42409	562.748	343.782	580.764	409.554	450.435	430.699	1700.63	1658.61	631.888
AT1G15460	TCV = Mock = NES	0.71036	-8.33403	-4.91746	0	0	0	1.1345	3.54674	4.9696	0.876615	0	0
AT1G15470	TCV = NES < Mock	0	-0.524569	0.0912964	325.078	337.531	315.055	503.718	450.435	452.234	271.751	317.945	328.016
AT1G15480	Mock < TCV < NES	1.65815e-05	1.16061	-0.829453	176.78	377.714	281.841	136.14	133.594	104.362	581.196	550.347	354.657
AT1G15490	TCV < Mock < NES	0	-0.948334	-0.339854	192.493	211.627	215.414	378.923	384.23	432.356	248.959	277.066	258.084
AT1G15500	TCV < NES < Mock	0	-0.455062	-1.37679	4825.1	4416.48	5485.95	6538.12	6797.91	6853.08	12357.6	13962.3	11926
AT1G15510	Mock < TCV < NES	7.28366e-10	0.524174	-1.35211	306.418	508.976	420.39	314.256	226.991	318.055	1193.95	1182.45	778.413
AT1G15520	TCV = NES > Mock	0.00841211	6.63662	-0.473242	1861.1	1264.4	876.84	17.0175	16.5514	6.62614	4393.59	588.955	573.611
AT1G15530	TCV = NES > Mock	0.0643192	0.545632	-0.416381	392.843	362.534	372.942	212.151	299.108	261.733	657.461	475.403	372.972
AT1G15540	TCV = Mock = NES	0.996186	1.26628	0.743008	0.982109	1.78588	2.84688	1.1345	1.18225	0	1.75323	0.757011	0.832528
AT1G15550	NES < TCV < Mock	6.09509e-06	-0.994566	2.37461	19.6422	39.2894	17.0813	36.304	80.3927	34.7872	3.50646	5.29908	5.82769
AT1G15570	TCV < Mock < NES	-2.22045e-16	-4.4999	-3.04607	8.83898	8.9294	26.5709	350.56	378.319	274.985	83.2784	132.477	150.687
AT1G15580	TCV < Mock = NES	4.71655e-06	-4.50489	-5.66445	0.982109	0	4.74481	53.3215	34.2851	43.0699	173.57	65.103	53.2818
AT1G15590	TCV = Mock = NES	0.984232	0	-4.91746	0	0	0	0	0	0	0.876615	0	0
AT1G15610	TCV > Mock = NES	0.136059	7.75019	7.75019	1.96422	4.4647	0	0	0	0	0	0	0
AT1G15620	TCV = Mock = NES	0.995247	-0.271177	1.27537	0.982109	0.89294	0	2.269	0	0	0	0.757011	0
AT1G15625	TCV > Mock = NES	0.154591	1.47039	2.06368	16.6958	10.7153	0.948961	4.538	2.36449	3.31307	3.50646	0.757011	2.49758
AT1G15640	TCV = Mock = NES	0.979381	4.9432	4.9432	0	0.89294	0	0	0	0	0	0	0
AT1G15660	TCV < Mock = NES	1.11022e-16	-0.715704	-0.698202	185.619	161.622	161.323	279.087	261.276	294.863	290.159	261.926	273.069
AT1G15670	TCV > Mock > NES	4.38015e-11	2.85737	1.85235	1512.45	871.51	1364.61	196.268	195.07	125.897	503.177	312.646	222.285
AT1G15680	TCV = Mock = NES	0.981251	5.9634	5.9634	0	0.89294	0.948961	0	0	0	0	0	0
AT1G15690	TCV = NES < Mock	0	-0.993263	-0.00419426	13288.9	10627.8	13123.2	23529.5	25830.9	24374.3	12228.8	12037.2	12881.7
AT1G15700	TCV = Mock < NES	4.44089e-16	0.1829	-0.865605	266.151	200.912	278.046	200.806	243.543	212.036	488.274	473.132	396.283
AT1G15710	TCV < Mock < NES	0	-1.85846	-0.617613	265.169	316.994	298.923	938.231	1199.98	1056.87	434.801	470.861	446.235
AT1G15720	TCV = Mock < NES	-2.22045e-16	0.126656	-1.15139	66.7834	114.296	91.1003	78.2804	89.8506	81.1702	213.894	214.234	176.496
AT1G15730	TCV = NES < Mock	6.99441e-15	-0.972964	-0.124007	960.502	739.355	843.627	1604.18	1914.06	1474.32	1028.27	907.657	835.858
AT1G15740	TCV > Mock > NES	-2.22045e-16	2.48582	2.08561	10456.5	10090.2	10319	2244.04	1467.17	1799	2274.82	2118.12	2878.88
AT1G15750	TCV > Mock > NES	0	1.26283	1.02338	15967.1	14792.4	14303.7	6303.28	5528.18	6947.51	7086.55	7052.32	8030.56
AT1G15757	TCV = Mock = NES	0.979381	4.9432	4.9432	0	0.89294	0	0	0	0	0	0	0
AT1G15760	TCV < Mock = NES	5.00413e-09	-1.44509	-1.94079	45.177	53.5764	67.3762	125.929	135.958	190.502	143.765	237.702	256.418
AT1G15770	TCV > Mock = NES	0.000153098	12.1534	12.1534	11.7853	97.3305	27.5199	0	0	0	0	0	0
AT1G15772	TCV > Mock = NES	1.11022e-16	8.38465	5.71741	93.3003	184.839	111.028	1.1345	0	0	3.50646	3.02805	0.832528
AT1G15780	TCV > Mock > NES	2.22045e-16	1.7945	1.56167	4169.05	4172.71	3844.24	1203.7	912.693	1396.46	1457.81	1306.6	1363.68
AT1G15790	TCV > Mock > NES	0	4.14445	1.54929	1518.34	2040.37	1552.5	113.45	66.2057	109.331	561.033	510.983	674.347
AT1G15800	TCV > Mock = NES	7.85688e-11	1.74027	1.62197	384.004	229.486	293.229	98.7014	98.1264	74.5441	92.9212	90.0843	111.559
AT1G15810	Mock < TCV < NES	0	0.453932	-0.449537	877.023	917.943	948.961	631.916	673.88	697.401	1349.99	1299.03	1098.1
AT1G15820	NES < TCV < Mock	0	-2.06745	0.416213	13140.6	10313.5	11887.6	44896.7	54337.2	48899.3	9006.34	7625.38	9852.96
AT1G15825	TCV = NES < Mock	0.120984	-8.35447	0	0	0	0	3.4035	4.72898	1.65653	0	0	0
AT1G15830	TCV = NES < Mock	2.22045e-16	-1.98687	0.322489	87.4077	167.873	105.335	422.034	523.735	483.708	105.194	108.253	74.9275
AT1G15860	TCV > Mock = NES	1.11022e-16	0.576362	0.570008	1862.08	1725.16	1695.79	1126.56	1285.1	1131.41	1122.94	1103.72	1332.04
AT1G15870	TCV = NES > Mock	0.00236069	2.92424	-0.545371	48.1233	300.921	161.323	21.5555	22.4627	23.1915	341.003	283.122	120.716
AT1G15880	TCV > Mock > NES	9.68114e-14	0.912889	0.606155	1584.14	1294.76	1394.02	812.301	744.815	712.31	916.062	839.526	1051.48
AT1G15885	TCV = NES < Mock	0.00121752	-0.788308	-0.23528	77.5866	86.6152	81.6107	150.888	164.332	109.331	73.6356	107.496	108.229
AT1G15890	TCV > Mock > NES	1.86251e-12	3.10272	0.721484	330.971	545.587	385.278	51.0525	37.8319	57.9787	295.419	297.505	172.333
AT1G15900	TCV > Mock = NES	0.00115969	3.09197	2.17141	38.3022	100.009	44.6012	2.269	14.1869	4.9696	12.2726	16.6542	11.6554
AT1G15910	TCV < Mock = NES	0.00405676	-0.722851	-0.488607	428.95	847.06	562.079	969.002	1043.5	1021.18	799.797	906.93	872.289
AT1G15920	Mock < TCV < NES	0	0.474972	-0.659096	555.873	715.245	600.692	437.917	468.169	440.638	986.192	936.423	1033.17
AT1G15930	TCV < Mock = NES	0.133394	-0.297415	-0.667197	3162.39	2548.45	3569.99	3276.43	4693.51	3435.65	5263.2	5578.42	3896.23
AT1G15940	TCV = NES > Mock	0.0103845	0.532345	0.005251	1879.76	2620.78	2042.16	1393.16	1371.4	1759.24	2306.37	2236.97	1975.59
AT1G15950	TCV = Mock > NES	0	-0.0224037	1.51095	6369.96	5857.61	5514.38	5445.37	6041.18	6533.06	2038.07	1813.8	2373.42
AT1G15960	TCV = Mock = NES	0.855407	-0.128117	0.341012	377.13	622.458	285.679	527.769	387.872	488.986	338.432	257.384	418.88
AT1G15970	TCV < Mock < NES	0	-2.09053	-0.856004	203.296	221.449	214.465	861.085	880.773	980.669	341.88	374.721	440.407
AT1G15980	TCV < Mock < NES	0	-3.50532	-1.41935	792.562	1124.21	866.402	10723.3	10816.4	10065.1	2300.24	2115.09	3028.74
AT1G15990	TCV > Mock = NES	5.8528e-05	10.9562	10.9562	3.92843	35.7176	19.9282	0	0	0	0	0	0
AT1G16000	TCV < NES < Mock	0	-1.18204	-1.73688	102.139	95.5446	160.374	262.069	341.669	208.723	397.983	445.88	349.662
AT1G16010	TCV > Mock > NES	0	1.07185	0.523418	2784.28	2669	2461.61	1318.29	1209.44	1237.43	1802.32	1732.8	1971.43
AT1G16020	TCV < Mock < NES	1.11022e-16	-1.75127	-0.832811	519.535	388.429	462.144	1406.78	1724.9	1480.94	818.758	794.105	827.532
AT1G16022	TCV = Mock = NES	0.888617	-1.29282	-0.337728	3.92843	9.82234	3.79585	17.0175	17.7337	8.28267	6.1363	6.05609	9.99033
AT1G16025	TCV > Mock = NES	0.173569	7.73013	7.73013	0.982109	5.35764	0	0	0	0	0	0	0
AT1G16030	Mock < TCV < NES	0	1.55719	-0.974016	356.505	363.427	378.636	122.526	101.673	149.088	855.576	656.329	646.041
AT1G16040	TCV > Mock > NES	1.11022e-16	1.49057	0.503657	777.83	687.564	678.507	226.9	249.454	286.581	510.19	438.31	563.621
AT1G16060	TCV = Mock = NES	0.870289	-0.181195	-0.162593	98.1873	98.2234	70.2231	128.198	61.4768	112.644	93.7978	92.3554	112.293
AT1G16070	TCV < Mock < NES	3.73035e-14	-2.65026	-1.72911	5.91622	8.03646	12.3365	58.994	61.4768	44.7264	16.6557	36.3365	34.2319
AT1G16080	TCV < Mock < NES	0	-2.54158	-0.884183	853.452	847.4	798.076	5040.58	5028.09	4480.93	1510.41	1436.05	1665.89
AT1G16090	TCV = Mock = NES	0.832705	0.107404	-0.295135	294.633	363.427	317.902	300.642	336.94	268.359	530.352	347.468	319.691
AT1G16110	TCV = NES > Mock	0	1.58984	0.252403	1043	957.232	922.39	344.888	190.342	435.669	945.867	810.002	697.658
AT1G16120	TCV = NES > Mock	4.51184e-07	3.93422	0.0650234	10.8032	36.6106	30.3668	3.4035	0	1.65653	24.5452	26.4954	23.3108
AT1G16130	TCV = Mock = NES	0.468665	1.51746	0.60539	450.788	237.522	307.463	114.584	137.14	96.079	396.23	181.683	76.5925
AT1G16150	TCV > Mock > NES	2.80281e-06	4.26208	1.63094	69.7297	68.7564	103.437	4.538	4.72898	3.31307	61.363	7.57011	9.1578
AT1G16160	TCV = NES > Mock	0.00675621	11.9561	0.430494	41.2486	43.7541	34.1626	0	0	0	81.5252	6.05609	0.832528
AT1G16170	NES < TCV < Mock	1.86601e-11	-0.941024	0.446628	217.046	138.406	211.618	334.677	440.978	313.085	140.258	139.29	136.535
AT1G16180	TCV > Mock = NES	0	1.71413	1.48883	12501.3	11080.5	10674.9	3688.26	2942.61	3810.03	4207.75	3673.78	4324.15
AT1G16190	TCV = Mock = NES	0.478479	0.896084	1.45771	638.371	2128.77	965.094	648.934	751.908	604.635	470.742	461.777	426.254
AT1G16210	TCV > Mock = NES	1.11022e-16	1.14291	1.1949	3005.25	2452.01	2596.36	1135.63	1308.75	1202.64	1308.79	1096.91	1112.26
AT1G16220	TCV = Mock = NES	0.396203	-0.0929853	1.23521	56.9623	312.529	129.059	166.771	209.257	155.714	65.7461	71.9161	74.095
AT1G16225	TCV > Mock = NES	2.14446e-11	12.258	12.258	21.6064	75.007	50.2949	0	0	0	0	0	0
AT1G16230	TCV > Mock = NES	6.13869e-06	13.3574	6.95354	37.3201	205.376	72.1211	0	0	0	1.75323	0.757011	0
AT1G16240	TCV > Mock = NES	6.54843e-12	0.766451	0.623647	3438.36	2807.4	2837.39	1850.37	1819.48	1669.79	2184.52	1884.96	1825.73
AT1G16250	TCV > Mock > NES	0	1.23958	0.447793	588.283	607.199	601.641	254.128	243.543	263.389	431.294	429.225	457.058
AT1G16260	TCV = Mock < NES	1.03181e-06	0.338987	-0.780959	2393.4	2749.36	2207.28	1739.19	1734.35	2337.37	3799.25	3718.44	5111.72
AT1G16270	TCV > NES > Mock	0	0.573081	0.880982	2290.28	1884.1	2165.34	1422.66	1207.07	1631.69	1149.24	1197.59	1095.61
AT1G16280	TCV < Mock = NES	0.226673	-0.356817	-0.777983	353.559	216.092	311.454	343.753	435.066	349.529	635.546	538.992	336.341
AT1G16290	TCV = Mock = NES	0.977263	-7.55965	-4.84554	0	0	0	1.1345	1.18225	3.31307	0	0	0.832528
AT1G16300	TCV = Mock < NES	1.13969e-09	-0.126236	-0.825981	151.245	96.4376	139.497	153.157	133.594	135.836	241.946	203.636	240.81
AT1G16310	TCV = Mock = NES	0.892757	0.0568448	0.4282	100.175	123.226	112.926	106.643	95.7619	120.927	77.1421	78.7292	94.0756
AT1G16320	TCV = NES < Mock	0	-0.849454	-0.065722	2605.53	2454.69	2083.92	4432.49	4282.09	4157.9	2517.64	2252.11	2707.38
AT1G16330	TCV = NES < Mock	2.70326e-07	-1.577	-0.212416	8.83898	39.2894	29.4178	81.6839	76.846	72.8875	16.6557	42.3926	30.8035
AT1G16340	TCV < NES < Mock	0	-1.08342	-2.15018	282.847	206.269	310.31	574.057	623.043	496.96	1143.11	1273.29	1132.24
AT1G16350	TCV < Mock = NES	1.83187e-14	-1.44989	-1.58618	406.593	323.244	476.379	1042.6	1103.03	1149.64	1359.63	1383.82	878.317
AT1G16360	TCV = Mock = NES	0.850657	-1.85001	-1.91068	0	0	3.79585	4.538	5.91123	3.31307	7.01292	1.51402	5.82769
AT1G16370	TCV < Mock < NES	0.000520903	-4.19747	-1.67742	12.7674	15.18	16.1323	488.969	167.879	152.401	49.0904	46.1777	45.789
AT1G16390	TCV < Mock < NES	2.26374e-13	-3.57372	-1.97254	7.85687	0	96.794	266.607	489.45	490.334	146.395	170.328	94.0756
AT1G16400	Mock < TCV < NES	0.110282	0.879317	-0.92841	74.7286	195.668	24.6331	86.3161	17.7337	56.3222	164.161	175.692	221.668
AT1G16410	TCV < Mock = NES	2.27914e-07	-1.29335	-2.18115	1042.91	1873.27	597.885	4198.69	839.394	3574.8	4758.03	5398.94	5780.02
AT1G16420	TCV > Mock > NES	4.86166e-09	2.84698	1.28699	604.979	510.762	322.647	111.181	39.0141	49.696	246.329	157.458	185.654
AT1G16430	TCV < Mock = NES	1.77339e-10	-0.665195	-0.763901	92.3182	91.9729	96.794	153.157	158.421	134.179	156.914	176.384	144.027
AT1G16440	TCV > Mock = NES	0.0216958	4.32009	3.1839	13.7495	100.009	35.1116	3.4035	2.36449	1.65653	6.1363	6.05609	4.16264
AT1G16445	TCV = Mock = NES	0.668225	0.146868	0.599395	37.3201	91.0799	55.0398	47.649	65.0235	53.0091	47.3372	53.7478	19.9807
AT1G16460	TCV = Mock > NES	3.9722e-06	0.142564	0.487206	2180.28	1749.27	1810.62	1668.85	1743.81	1787.4	1357.88	1286.92	1450.26
AT1G16470	TCV > Mock = NES	0.00109675	0.361626	0.388404	2101.71	2044.83	2025.08	1563.34	1681.15	1558.8	1424.5	1407.28	1883.18
AT1G16480	TCV = Mock < NES	5.33524e-09	-0.410329	-1.24027	54.9981	68.7564	82.5596	82.8184	80.3927	110.988	174.446	183.954	129.042
AT1G16490	TCV < Mock < NES	0	-4.82474	-3.11142	3.92843	6.25058	4.74481	103.239	171.426	149.088	27.1751	37.0936	64.9371
AT1G16500	TCV = Mock = NES	0.832833	-0.0394558	0.191384	636.406	634.881	548.5	743.097	572.207	554.939	462.853	564.73	566.119
AT1G16510	TCV > Mock = NES	0	5.26228	4.30071	852.47	1016.17	490.613	18.152	20.0982	23.1915	39.4477	38.6076	41.6264
AT1G16515	TCV < Mock < NES	0	-3.18274	-1.79201	45.177	67.8635	38.9074	434.513	504.819	440.638	266.491	116.58	143.195
AT1G16520	TCV < Mock = NES	0	-1.07138	-0.984565	194.457	212.52	232.496	443.589	497.725	402.538	357.659	448.151	459.555
AT1G16530	TCV > NES > Mock	7.48535e-08	1.82616	4.31379	164.994	87.5082	64.5294	28.3625	37.8319	23.1915	7.88953	3.02805	4.99517
AT1G16540	TCV > Mock > NES	0	1.34357	0.685897	1107.82	984.02	998.307	397.075	436.249	384.316	635.546	635.133	650.204
AT1G16560	TCV = NES > Mock	0.00415577	0.580869	-0.0139738	1634.23	1851.07	1630.32	1116.35	1157.42	1146.32	1416.61	1678.29	2070.5
AT1G16570	Mock < TCV < NES	4.79616e-14	0.504293	-0.233843	633.46	505.404	543.755	395.94	396.052	394.255	698.662	646.488	633.553
AT1G16590	TCV > Mock = NES	0	0.877332	1.06131	236.688	220.556	208.771	113.45	109.949	139.149	110.453	102.954	105.731
AT1G16610	TCV > Mock > NES	0	1.41557	0.973477	1461.38	1467.99	1673.02	581.998	565.113	578.131	830.154	849.367	664.357
AT1G16630	TCV < Mock < NES	1.11022e-16	-3.71609	-3.09824	9.82109	9.82234	15.1834	181.52	132.411	144.119	83.2784	112.795	102.401
AT1G16640	TCV < Mock < NES	0	-3.54927	-2.02565	16.6958	4.4647	11.3875	115.719	143.052	122.584	43.8307	52.9908	35.7987
AT1G16650	TCV = Mock = NES	0.468063	-0.0475105	-0.861772	253.384	161.622	220.159	172.444	230.538	253.45	532.982	414.842	206.467
AT1G16670	TCV > Mock = NES	4.64073e-14	0.786999	1.20177	1839.49	1585.86	1405.41	1008.57	692.796	1098.28	769.668	658.6	671.85
AT1G16680	TCV < Mock < NES	0	-0.80188	-0.297651	843.631	956.339	850.269	1517.96	1454.16	1648.25	1054.57	1092.37	1110.59
AT1G16690	TCV = Mock = NES	0.555479	0.293719	0.699186	168.923	405.395	239.138	220.093	236.449	207.067	167.433	169.571	164.008
AT1G16700	TCV = Mock > NES	4.19441e-05	0.0802327	0.571059	1284.6	1566.22	1340.88	1304.67	1272.1	1388.18	895.024	784.264	1142.23
AT1G16705	TCV > Mock = NES	0.0388842	2.36743	3.67872	26.5169	168.766	54.0908	4.538	18.9159	24.848	4.38307	7.57011	7.49275
AT1G16710	TCV > Mock = NES	0	1.11655	0.910935	4014.86	4778.12	4514.21	2164.62	1713.07	2259.51	2303.74	2305.1	2468.44
AT1G16720	NES < TCV < Mock	1.11022e-16	-0.648774	0.693625	4479.4	5323.71	4810.28	8243.27	6764.81	7903.33	2803.41	2431.52	3800.49
AT1G16730	TCV > NES > Mock	7.90068e-12	0.367156	1.34067	841.667	940.266	662.375	689.775	484.721	720.593	319.964	276.309	368.81
AT1G16740	TCV = Mock = NES	0.934184	0.129534	-0.0133834	712.029	867.045	697.487	661.413	846.488	573.161	788.077	797.89	711.811
AT1G16750	TCV < Mock < NES	0	-2.39688	-1.31419	135.531	98.2234	182.201	665.951	675.062	849.802	323.471	334.599	376.302
AT1G16760	TCV = Mock = NES	0.958974	1.94233	3.04194	0.982109	3.57176	1.89792	0	0	1.65653	0	0.757011	0
AT1G16770	TCV > Mock = NES	2.21675e-05	1.63125	2.46121	15.7137	15.18	18.9792	5.6725	7.09347	3.31307	3.50646	3.02805	2.49758
AT1G16780	TCV < Mock < NES	0	-1.12254	-0.486464	257.312	300.921	255.271	557.039	569.842	644.392	323.471	388.347	427.919
AT1G16790	TCV > Mock = NES	0.353289	0.413292	0.284466	160.084	138.832	171.762	123.66	129.777	99.9901	122.726	143.832	119.884
AT1G16800	TCV = Mock < NES	0.00365224	0.229758	-0.512956	445.877	503.192	538.061	392.537	389.228	486.423	792.46	783.507	546.138
AT1G16810	TCV = Mock = NES	0.934929	0.160755	0.0855862	2038.86	1611.76	1654.99	1551.99	1815.93	1378.24	1675.21	1630.6	1694.19
AT1G16820	TCV = Mock = NES	0.935253	0.71358	0.289628	72.676	61.6129	63.5804	38.573	47.2898	34.7872	49.0904	62.8319	49.9517
AT1G16825	TCV > Mock = NES	1.11022e-16	0.656054	0.958229	192.493	168.766	171.762	116.853	125.318	96.079	83.2784	87.8133	103.233
AT1G16830	TCV = Mock < NES	0.000494997	0.563354	-2.21929	50.0875	135.727	68.3252	55.5905	56.7478	59.6353	498.794	496.599	188.151
AT1G16840	TCV > NES > Mock	0	2.03661	2.36844	2226.44	2186.81	2063.99	584.267	502.454	491.991	340.127	358.066	556.128
AT1G16850	TCV < Mock = NES	2.65477e-12	-1.01449	-1.23076	43.2128	69.6493	89.2024	167.906	119.407	120.927	163.927	152.159	158.18
AT1G16860	TCV < Mock < NES	0	-1.50991	-0.568388	579.444	505.404	667.12	1651.83	1664.6	1673.1	840.674	844.825	912.45
AT1G16870	TCV = Mock < NES	2.64616e-09	0.0857966	-0.39209	625.603	681.313	704.129	578.595	719.987	596.353	925.705	884.189	829.197
AT1G16880	TCV = NES < Mock	0	-1.33122	0.0661007	6949.4	7401.17	5952.83	16867.7	17665.1	16553.8	5653.29	5713.92	8026.93
AT1G16890	TCV > Mock = NES	3.07754e-13	0.595182	0.812581	5009.74	4659.77	4394.64	3259.42	3239.35	2811.14	2296.73	2467.86	3242.99
AT1G16900	Mock < TCV < NES	0	0.918644	-0.438199	832.828	764.357	960.349	453.8	430.337	468.799	1094.02	1199.86	1171.37
AT1G16905	TCV = Mock = NES	0.993277	5.02822	-0.765008	0	0	0.948961	0	0	0	0.876615	0.757011	0
AT1G16910	TCV = Mock = NES	0.994421	-2.46337	-2.1879	0	0.89294	0	3.4035	0	1.65653	1.75323	0.757011	1.66506
AT1G16916	TCV < Mock = NES	2.22045e-16	-0.992855	-0.756286	101.653	119.462	125.288	225.02	261.681	202.712	189.868	213.418	181.856
AT1G16920	TCV < Mock < NES	1.31236e-09	-1.91991	-0.962154	197.89	73.4131	352.04	655.351	953.668	749.796	336.101	439.126	439.209
AT1G16930	TCV < Mock = NES	1.11022e-16	-1.35723	-1.4624	226.867	166.087	249.577	567.25	519.006	559.909	564.54	703.264	502.847
AT1G16950	TCV = Mock = NES	0.993135	5.02822	-0.726259	0	0	0.948961	0	0	0	0	0.757011	0.832528
AT1G16960	TCV < Mock < NES	0	-1.9927	-0.890636	133.567	143.763	128.11	613.764	484.721	515.182	244.576	215.748	291.385
AT1G16970	Mock < TCV < NES	4.7129e-13	0.317757	-0.255305	809.257	892.94	831.29	680.699	581.665	770.289	1027.39	1033.32	963.234
AT1G17020	TCV > Mock > NES	0	6.57981	4.06786	1537.98	1414.42	1114.08	7.94149	13.0047	21.535	77.1421	53.7478	111.559
AT1G17030	TCV = NES < Mock	0.000729403	-1.0545	0.316074	29.4633	13.3941	24.673	32.9005	54.3833	53.0091	11.396	21.1963	21.6457
AT1G17040	NES < TCV < Mock	1.37728e-11	-0.214523	0.346725	450.788	423.254	397.615	541.156	453.982	480.395	341.003	320.973	338.006
AT1G17050	TCV < Mock < NES	0	-2.08461	-0.677133	1994.66	2171.63	1803.03	8141.17	8175.23	9003.27	3171.59	2619.26	3753.87
AT1G17060	TCV < Mock = NES	0.00022711	-1.05374	-0.643237	54.9981	65.1632	107.233	140.678	169.061	162.34	93.7978	142.318	119.051
AT1G17065	TCV = Mock = NES	0.979632	4.97632	4.97632	0	0.914371	0	0	0	0	0	0	0
AT1G17070	TCV = Mock = NES	0.930023	-0.0278756	0.0368471	579.444	350.926	503.898	509.39	424.426	528.435	524.216	486.758	387.125
AT1G17080	TCV > NES > Mock	1.11022e-16	1.14658	1.60432	2547.59	2641.32	2393.28	1060.76	1176.33	1187.74	807.362	738.086	948.249
AT1G17090	TCV < NES < Mock	1.87633e-08	-0.738149	-1.38993	95.2645	190.196	96.794	201.941	251.818	183.875	277.887	345.954	377.968
AT1G17100	TCV < Mock < NES	6.28785e-08	-0.880786	-0.317375	3787.99	2842.23	2945.58	5332.15	5560.1	6740.44	4121.84	3536	4274.2
AT1G17110	TCV = Mock = NES	0.915536	0.0223188	-0.102754	2354.11	2012.69	2039.32	2185.05	1863.22	2259.51	2195.92	2335.38	2347.73
AT1G17120	Mock < TCV < NES	0	0.33971	-1.46938	1342.54	1432.28	1476.58	1102.73	1072.3	1184.42	4156.03	3860.76	3755.53
AT1G17130	TCV = Mock = NES	0.895871	-0.105695	-0.120343	1507.54	1427.81	1368.4	1548.59	1735.54	1346.76	1619.98	1657.85	1400.31
AT1G17140	TCV < Mock < NES	0	-3.69231	-2.23185	145.352	83.9364	277.097	2006.93	2154.05	2385.41	833.661	801.675	743.447
AT1G17145	TCV > Mock = NES	0	0.616407	0.720633	1053.8	933.123	932.829	711.331	543.833	649.362	568.046	593.497	610.243
AT1G17147	TCV > Mock > NES	1.44329e-15	2.97076	1.25634	155.173	132.136	104.386	27.228	9.45796	13.2523	69.2526	60.5609	34.1336
AT1G17160	TCV > Mock > NES	0	1.6661	0.393485	1131.39	1048.31	902.462	297.239	314.477	359.468	941.484	663.142	741.782
AT1G17170	Mock < TCV < NES	2.2807e-06	3.01154	-2.0446	133.567	183.946	188.843	26.0935	11.8225	24.848	1033.53	701.75	353.824
AT1G17180	Mock < TCV < NES	1.1109e-07	2.2697	-2.75731	8.83898	16.0729	7.59169	3.4035	0	3.31307	105.194	43.1496	71.5974
AT1G17190	TCV < Mock < NES	1.11022e-16	-4.98788	-3.476	2.94633	4.4647	9.48961	216.689	154.874	165.653	49.0904	39.3646	99.9033
AT1G17200	TCV < Mock < NES	0	-2.76605	-2.31646	127.674	79.4717	111.028	770.325	711.712	682.492	612.754	577.6	394.618
AT1G17210	Mock < TCV < NES	0	0.681254	-0.28003	4958.67	4970.11	5218.34	3191.35	2944.97	3309.76	6077.57	6079.56	6234.8
AT1G17220	TCV < Mock < NES	0	-1.73436	-0.794751	6446.56	6708.66	6185.33	21023.4	20765	22563.7	10761.3	10467.2	12323.1
AT1G17230	TCV = Mock = NES	0.944015	0.00135673	-0.0582827	597.122	751.856	645.294	687.506	546.197	758.693	703.045	678.282	695.16
AT1G17235	TCV = Mock = NES	0.669177	1.51747	0.761712	2.94633	0.89294	7.59169	1.1345	1.18225	1.65653	4.38307	1.51402	0.832528
AT1G17240	TCV = NES > Mock	1.11022e-16	2.72858	0.40678	168.923	197.34	177.456	40.842	13.0047	28.1611	185.842	121.879	102.401
AT1G17250	TCV > Mock > NES	0	2.26552	0.374219	146.334	140.192	123.365	37.4385	21.2804	26.5046	111.33	115.823	89.0804
AT1G17260	TCV > Mock > NES	0.0369537	2.79045	1.27354	189.547	667.919	358.707	55.5905	55.5655	64.6049	176.2	178.655	148.19
AT1G17270	TCV > Mock > NES	9.05584e-05	0.660944	0.244621	318.203	239.308	296.076	182.654	166.697	190.502	234.056	231.645	254.753
AT1G17280	TCV > NES > Mock	0	0.635577	0.972967	2294.21	1970.72	1993.77	1313.75	1371.4	1343.45	1051.06	947.778	1189.68
AT1G17285	TCV = Mock = NES	0.961958	0.883122	1.32035	10.8032	8.9294	7.59169	7.94149	3.54674	3.31307	3.50646	0.757011	6.66022
AT1G17290	TCV > Mock > NES	0	1.19616	0.823259	11560.4	10568.8	10589.5	4350.8	5323.65	4605.17	6188.02	6097.73	6205.66
AT1G17300	TCV > Mock = NES	4.68536e-10	15.3416	9.5484	122.764	751.856	371.044	0	0	0	0.876615	0.757011	0
AT1G17310	TCV > Mock = NES	1.11022e-16	12.4641	12.4641	35.3559	55.3623	78.7638	0	0	0	0	0	0
AT1G17330	TCV > Mock = NES	0.000635338	0.250629	0.525924	769.973	602.735	583.611	559.308	561.567	523.465	452.333	470.104	436.244
AT1G17340	TCV > NES > Mock	0	0.457239	1.05445	1543.87	1602.65	1572.43	1250.22	1010.82	1176.14	757.395	722.946	791.734
AT1G17345	TCV = Mock = NES	0.997731	-0.574694	-0.483161	0	0.89294	3.79585	2.269	4.72898	0	2.62984	2.27103	1.66506
AT1G17350	TCV < Mock = NES	0	-1.5576	-1.32211	80.5329	50.0047	83.5086	189.461	243.543	197.128	184.089	177.141	173.998
AT1G17360	TCV < Mock < NES	0	-2.18719	-1.14761	1967.16	1605.51	1899.82	8631.27	8164.59	8126.96	3746.65	4417.16	3960.33
AT1G17370	TCV > NES > Mock	0	0.217152	0.765152	2793.12	2770.79	2617.24	2368.83	2219.07	2450.02	1625.24	1495.1	1693.36
AT1G17380	TCV = Mock = NES	0.630108	-1.07278	1.18061	1306.2	730.425	634.855	3740.44	1080.57	798.45	497.917	362.608	318.026
AT1G17400	TCV < Mock < NES	0.000723921	-4.49456	-3.09775	0	0	1.89792	7.94149	10.6402	24.848	7.01292	5.29908	4.16264
AT1G17410	TCV = Mock = NES	0.967594	-0.0671077	-0.119562	196.422	173.23	180.303	196.268	217.533	162.34	210.388	175.627	211.462
AT1G17420	TCV = Mock > NES	0.0145943	0.250997	1.54196	2315.81	1218.86	1372.2	2135.13	994.268	993.921	668.857	436.796	579.439
AT1G17430	TCV = Mock > NES	0.31193	0.100692	0.651601	329.006	359.855	310.31	311.987	230.538	389.286	146.395	174.113	315.528
AT1G17440	TCV > NES > Mock	-2.22045e-16	0.847042	1.24639	3133.91	2859.19	2601.1	1587.16	1341.85	1848.69	1198.33	1120.38	1303.74
AT1G17450	TCV > Mock > NES	-2.22045e-16	2.25437	1.50522	2328.58	2375.22	2099.1	461.741	351.127	612.918	812.622	763.824	820.04
AT1G17455	TCV = Mock < NES	0	0.237546	-1.74321	255.348	125.905	202.129	167.906	167.879	159.027	621.52	672.226	659.362
AT1G17460	TCV > Mock > NES	2.13163e-14	3.63569	1.02406	439.985	727.746	446.961	38.573	44.9253	46.383	227.043	275.552	291.385
AT1G17470	TCV < NES < Mock	4.44089e-16	-0.427103	-0.93291	2112.52	1997.51	2321.16	2751.16	3179.06	2716.72	3921.97	4607.93	3748.04
AT1G17480	TCV = NES < Mock	2.88658e-15	-1.54436	-0.151253	19.6422	31.2529	31.3157	83.9529	69.7525	86.1398	18.4089	37.0936	35.7987
AT1G17490	TCV = Mock > NES	0.00189371	-0.062676	0.409633	616.764	607.199	466.889	570.653	600.581	594.696	379.574	408.786	484.531
AT1G17500	TCV = Mock < NES	2.91869e-06	0.221011	-0.65752	1205.05	1551.93	1450.01	1182.15	1130.23	1297.07	1892.61	2123.42	2619.96
AT1G17510	TCV > Mock > NES	1.19904e-14	1.38887	0.435132	280.883	251.809	313.157	108.912	114.678	99.3921	242.822	210.449	172.333
AT1G17520	TCV > Mock = NES	1.02907e-11	0.291073	0.47714	528.374	482.188	482.072	399.344	427.973	392.599	388.34	345.954	338.006
AT1G17530	TCV > Mock > NES	0	2.34513	1.1017	2407.15	2099.3	2248.09	475.355	381.865	472.112	1195.7	1032.56	919.11
AT1G17540	TCV = Mock = NES	0.991329	5.9634	1.04594	0	0.89294	0.948961	0	0	0	0.876615	0	0
AT1G17545	TCV > Mock = NES	0.0023712	10.4489	10.4489	2.94633	29.467	9.48961	0	0	0	0	0	0
AT1G17550	TCV > Mock = NES	0.00189899	0.676388	0.3744	4489.22	5916.62	4467.71	3225.38	2745.17	3336.26	3809.77	3640.47	4023.61
AT1G17560	TCV < Mock = NES	6.66134e-16	-2.50057	-2.34043	21.6064	13.3941	21.8261	94.1634	109.949	117.614	105.194	121.122	61.607
AT1G17580	TCV > Mock > NES	0.000643097	0.47427	0.222851	2527.95	2333.25	2309.77	1749.4	1383.23	2029.26	2074.95	2134.01	1935.63
AT1G17590	TCV = Mock = NES	0.72245	0.409428	0.0139932	241.599	459.864	343.524	272.28	241.178	273.328	344.51	331.571	358.819
AT1G17600	TCV = Mock < NES	8.52145e-06	0.272899	-0.612243	752.752	705.697	800.915	681.834	456.826	731.309	998.464	1102.21	1353.08
AT1G17610	TCV = Mock = NES	0.822935	0.0789713	0.207512	589.791	622.105	555.151	654.606	455.868	562.445	468.112	532.936	529.262
AT1G17615	TCV > Mock > NES	1.11022e-16	14.4486	3.55667	168.923	305.386	196.435	0	0	0	13.1492	19.6823	24.1433
AT1G17620	TCV = Mock > NES	1.0904e-06	0.196451	1.66828	2138.05	996.521	2091.51	1575.82	1557.02	1427.93	473.372	563.973	606.913
AT1G17630	TCV = Mock < NES	0.0187966	-0.285701	-1.08269	33.3917	83.0435	55.9887	80.5494	48.4721	81.1702	140.258	140.047	84.9178
AT1G17640	TCV > Mock > NES	0	1.98963	1.16954	503.822	504.511	463.093	115.719	120.589	134.179	230.55	202.122	221.452
AT1G17650	TCV < Mock < NES	0	-3.523	-2.0488	144.37	149.121	198.333	1911.63	2109.13	1633.34	680.253	689.637	665.19
AT1G17665	Mock < TCV < NES	4.0742e-06	2.43668	-2.78653	15.7137	11.6082	10.4386	3.4035	3.54674	0	110.453	112.795	37.4637
AT1G17680	TCV > Mock > NES	-2.22045e-16	1.20576	0.527646	1579.23	1437.63	1370.3	631.916	571.025	699.058	1136.97	1011.37	894.967
AT1G17690	TCV < Mock = NES	0.00525826	-0.976966	-1.50963	558.82	453.614	607.335	982.476	1145.6	1060.18	1915.4	1859.22	837.523
AT1G17700	TCV < Mock < NES	0.00378737	-2.263	-0.78034	2.94633	0.89294	38.9074	45.38	72.117	87.7963	18.4089	40.8786	14.153
AT1G17710	TCV > Mock > NES	7.67485e-10	4.47657	2.7212	52.0518	96.4376	52.1929	5.6725	0	3.31307	13.1492	10.5982	6.66022
AT1G17720	TCV > Mock = NES	1.03706e-12	0.201393	0.300159	3637.73	3500.33	3502.62	3063.15	3128.22	3062.93	2670.17	3012.15	2959.64
AT1G17730	TCV = Mock > NES	1.11022e-16	0.0450236	0.942404	1035.14	953.66	984.073	985.88	1006.09	889.559	465.482	475.403	606.08
AT1G17744	TCV > Mock > NES	0	4.09243	2.25861	65.8926	90.3468	64.6518	2.27354	2.36449	8.28267	18.4238	14.3923	13.3204
AT1G17745	TCV > Mock > NES	0	2.4167	0.890123	5267.94	6195.95	4948.71	1139.04	644.324	1290.44	2685.05	2904.64	3266.01
AT1G17750	TCV = NES < Mock	2.1413e-07	-1.93288	-0.493836	68.7476	38.3964	55.9887	281.356	147.781	193.815	71.0058	77.9722	80.7552
AT1G17760	TCV > Mock = NES	0	0.757894	0.68729	1277.72	1144.75	1212.77	720.407	607.674	821.641	841.55	760.796	655.199
AT1G17780	TCV > Mock = NES	0.0293294	0.365669	0.270708	1464.32	1230.47	1119.77	966.593	930.427	1063.5	1079.11	1003.04	1079.79
AT1G17790	TCV = Mock = NES	0.931384	-0.00745987	-0.027674	543.106	341.103	406.155	476.49	436.249	384.316	432.171	451.936	431.249
AT1G17800	TCV = Mock = NES	0.899582	7.27298	7.27298	0.982109	2.67882	0.948961	0	0	0	0	0	0
AT1G17810	TCV > Mock = NES	2.52465e-06	9.64694	9.64694	3.92843	12.5012	7.59169	0	0	0	0	0	0
AT1G17820	TCV = Mock < NES	0	-0.0030278	-0.601342	924.164	950.089	904.36	928.02	930.427	926.003	1447.29	1384.57	1383.66
AT1G17830	TCV < Mock < NES	-2.22045e-16	-2.31185	-1.25019	59.9086	41.0753	74.019	317.66	289.65	261.733	125.356	171.085	119.884
AT1G17840	TCV < Mock < NES	0	-2.73429	-1.36998	1299.33	647.382	1876.1	7504.58	8375.62	9558.21	3329.38	3365.48	3185.87
AT1G17850	TCV < Mock = NES	0	-1.41876	-1.42638	190.529	321.459	232.496	652.479	721.757	616.231	670.61	696.643	633.759
AT1G17860	TCV > Mock = NES	1.28542e-05	0.920266	1.37598	1027.29	662.562	614.927	403.882	394.87	419.103	344.51	293.72	249.758
AT1G17870	TCV > Mock = NES	0.0952031	1.71676	2.3235	401.682	1622.47	756.322	195.134	314.477	336.277	178.829	138.533	238.103
AT1G17880	TCV < Mock = NES	3.80051e-06	-1.03713	-0.794271	2429.74	2073.41	2437.88	4137.52	5731.53	4374.91	4484.76	4442.9	3109.49
AT1G17890	TCV = Mock = NES	0.951415	-0.036088	-0.024853	845.595	1018.84	841.729	905.33	1001.36	868.024	819.635	905.386	1028.17
AT1G17910	TCV = Mock = NES	0.979381	4.9432	4.9432	0	0.89294	0	0	0	0	0	0	0
AT1G17920	TCV < Mock < NES	1.20481e-06	-1.42893	-0.680148	52.0518	192.875	103.437	315.391	281.374	341.246	178.829	194.552	184.821
AT1G17930	TCV = NES > Mock	2.66238e-07	1.00516	0.170145	699.261	1008.13	755.373	428.841	380.683	417.447	745.999	759.282	683.505
AT1G17940	TCV = Mock = NES	0.839068	-0.232735	-0.168933	396.772	501.832	433.675	517.332	479.992	568.191	554.897	412.571	530.32
AT1G17950	TCV < Mock = NES	6.66134e-16	-4.1448	-3.72095	1.96422	0	2.84688	28.3625	30.7384	26.5046	21.0388	21.9533	20.8132
AT1G17960	Mock < TCV < NES	0.000658919	1.6879	-2.71477	26.5169	26.7882	23.724	5.6725	8.27572	9.93921	251.588	196.823	57.4444
AT1G17970	NES < TCV < Mock	2.22045e-16	-1.01402	0.474657	78.5687	75.007	93.9472	159.964	139.505	200.441	56.1033	53.7478	68.2673
AT1G17980	TCV > NES > Mock	1.11022e-16	0.746321	1.30175	1997.35	1986.84	1698.64	1215.05	974.923	1197.67	770.544	754.74	779.841
AT1G17990	TCV = NES > Mock	9.37268e-08	2.256	0.0754217	1099.7	2550.09	1836.82	430.262	324.601	393.742	1852.12	1544.64	1810.38
AT1G18000	TCV > Mock = NES	0.0504294	0.341373	0.634793	737.024	474.801	662.822	492.784	506.305	480.544	330.091	409.596	467.637
AT1G18010	TCV > Mock = NES	0.000499934	2.47659	2.91466	192.05	502.968	245.334	89.2136	68.2664	11.4467	26.6912	71.1061	26.884
AT1G18020	TCV > Mock = NES	4.31598e-07	1.16881	1.34262	828.182	814.513	527.041	345.735	367.013	252.307	221.954	250.234	383.332
AT1G18030	TCV > NES > Mock	0	0.464189	0.921044	345.956	358.916	321.698	222.362	278.257	243.511	181.459	175.627	185.058
AT1G18040	TCV < Mock = NES	0.304656	-0.508104	-0.243972	157.137	217.877	197.384	248.455	254.183	311.429	241.946	253.599	182.324
AT1G18050	TCV > Mock = NES	1.09019e-08	5.67801	8.04184	30.4454	114.296	62.6314	0	2.36449	1.65653	0	0.757011	0
AT1G18060	TCV < Mock < NES	0	-3.28252	-1.85239	518.553	736.676	543.755	5656.61	6178.41	5670.32	2217.84	2028.03	2250.32
AT1G18070	TCV < Mock < NES	6.13378e-09	-0.521902	-0.198446	4347.79	4176.28	4283.61	5888.05	6788.45	5713.39	5176.41	4999.3	4520.62
AT1G18080	TCV = Mock = NES	0.96965	0.0277917	-0.139483	4742.6	4224.5	5039.93	3797.17	5231.44	4711.19	5793.55	5711.65	3923.7
AT1G18090	TCV = NES < Mock	0.344716	-0.652114	0.383904	146.334	540.229	270.454	473.086	543.833	487.021	256.848	255.113	221.452
AT1G18100	TCV > Mock = NES	0.0473195	3.40654	8.74312	2.94633	8.9294	0.948961	0	1.18225	0	0	0	0
AT1G18140	TCV = Mock = NES	0.477288	-1.42281	-0.618712	1.96422	2.67882	1.89792	14.7485	1.18225	1.65653	4.38307	1.51402	4.16264
AT1G18150	TCV = Mock > NES	0.0688509	0.187486	0.496221	1551.73	1171.54	1243.14	1219.59	948.161	1315.29	919.569	875.105	1017.35
AT1G18160	TCV = NES > Mock	0	1.01537	-0.018611	2777.4	2858.3	2645.7	1371.61	1159.78	1565.43	2784.13	2735.08	2869.72
AT1G18170	NES < TCV < Mock	1.11022e-16	-1.23111	0.310039	450.788	670.598	431.777	1152.65	1304.02	1189.39	413.762	376.992	462.053
AT1G18180	TCV > Mock = NES	0.0137574	1.38808	1.00707	235.706	510.762	318.851	152.023	140.687	114.301	151.654	187.739	190.649
AT1G18190	TCV = NES < Mock	7.74769e-06	-0.510771	-0.0541789	560.784	411.645	553.244	709.062	684.52	780.228	518.079	530.665	535.315
AT1G18193	TCV = Mock = NES	0.382253	1.73337	-0.981763	0.982109	0	10.4044	3.4035	0	0	5.25969	2.27103	14.9855
AT1G18197	TCV > Mock = NES	8.44733e-07	9.71433	4.02874	4.91054	9.82234	10.4386	0	0	0	0	1.51402	0
AT1G18200	TCV > NES > Mock	2.39931e-09	1.16452	3.05296	361.416	198.233	209.72	166.771	121.771	54.6656	36.8178	24.2244	31.636
AT1G18210	TCV > Mock = NES	8.60522e-08	0.965786	1.346	4181.82	2899.38	3042.37	2248.58	1690.61	1244.06	1259.7	1239.98	1482.73
AT1G18250	TCV = Mock = NES	0.616538	0.181243	1.3808	69.7297	465.222	167.017	232.572	192.706	193.815	75.3889	98.4115	95.7407
AT1G18260	TCV > Mock > NES	0	1.23308	0.632492	2522.05	2868.1	2561.25	1137.9	1048.65	1196.02	1532.32	1632.87	1963.93
AT1G18265	TCV > Mock > NES	0.0063279	3.16077	1.19755	89.3719	227.7	92.9982	23.8245	7.09347	14.9088	58.7332	48.4487	71.5974
AT1G18270	TCV > Mock = NES	0	1.4048	1.40287	4347.79	3795	3756.94	1464.64	1177.52	1852.01	1530.57	1310.39	1659.23
AT1G18280	TCV = Mock = NES	0.981712	5.07626	5.07626	0.982109	0	0	0	0	0	0	0	0
AT1G18300	NES < TCV < Mock	0	-1.81388	1.10382	5443.83	2776.15	3380.2	15297.6	14151.5	11335.7	1932.06	2108.28	1357.02
AT1G18310	TCV > Mock = NES	0.023264	9.45911	2.6329	2.94633	13.3941	4.74481	0	0	0	0.876615	0	2.49758
AT1G18320	Mock < TCV < NES	0.0498056	0.791067	-1.31127	23.8387	34.338	45.832	19.198	27.8773	13.0204	98.2922	122.674	37.1857
AT1G18330	TCV > Mock = NES	0.279485	0.625843	0.887898	2027.07	1007.7	1958.16	808.047	1367.7	1059.87	827.56	790.191	1080.42
AT1G18335	TCV < Mock = NES	0.115545	-0.278818	-0.252771	298.561	252.702	277.097	358.502	341.669	304.802	329.607	295.234	362.149
AT1G18340	TCV < Mock < NES	0	-0.975526	-0.589245	169.905	140.192	159.425	282.49	347.58	293.207	225.29	234.674	246.428
AT1G18350	TCV = Mock = NES	0.878003	-0.238272	1.89864	9.82109	6.25058	2.84688	9.07599	8.27572	4.9696	2.62984	0.757011	1.66506
AT1G18360	TCV < Mock < NES	0	-3.60258	-1.54058	161.066	117.868	195.486	1669.98	1651.6	2441.73	447.074	410.3	522.827
AT1G18370	TCV < Mock < NES	0	-3.21795	-1.78391	19.6422	18.7517	50.2949	307.449	286.103	231.915	84.155	109.767	111.559
AT1G18390	TCV > Mock > NES	3.37989e-11	2.25698	0.833101	530.339	396.466	496.307	141.812	69.7525	86.1398	363.795	254.356	180.658
AT1G18400	TCV < Mock < NES	1.11022e-16	-4.46577	-3.19343	8.83898	5.35764	66.4273	712.465	504.819	564.878	211.264	255.113	271.404
AT1G18410	TCV > Mock = NES	0.119022	1.30552	1.87493	14.7316	39.2894	10.4386	10.2105	5.91123	9.93921	4.38307	1.51402	11.6554
AT1G18420	TCV = Mock = NES	0.997688	0.775468	-0.113295	2.94633	1.78588	3.79585	0	0	4.9696	4.38307	1.51402	3.33011
AT1G18440	TCV < Mock < NES	0	-1.63289	-0.606019	151.245	206.269	150.885	528.677	571.025	477.082	256.848	242.244	274.734
AT1G18450	TCV = NES > Mock	0.244761	0.293966	0.0799768	1486.91	1298.34	1490.82	1091.39	1273.28	1123.13	1399.08	1420.91	1225.48
AT1G18460	NES < TCV < Mock	0	-0.335809	0.478519	1891.54	1788.56	1789.74	2424.15	2262.82	2216.44	1289.5	1260.11	1376.17
AT1G18470	TCV > Mock = NES	0	2.6473	2.25708	5108.93	3478	3956.22	719.549	659.693	622.857	886.258	827.731	909.953
AT1G18480	TCV = NES > Mock	0.00915811	0.647899	-0.287102	1028.27	957.232	971.736	595.612	740.086	551.626	1373.66	1366.41	868.326
AT1G18485	TCV = Mock = NES	0.922143	-0.00613897	-0.500918	486.144	2009.12	879.687	1105	1156.24	1128.1	1705.89	1680.57	1389.49
AT1G18486	TCV > Mock = NES	3.34893e-05	11.7772	11.7772	9.99983	68.8823	26.383	0	0	0	0	0	0
AT1G18490	TCV < Mock < NES	1.11022e-16	-0.617729	-0.298687	337.667	363.301	337.069	546.829	530.828	515.182	442.69	384.562	449.565
AT1G18500	TCV = Mock > NES	0.0411088	-0.201381	0.291455	2416.97	1958.22	2060.19	2628.63	2320.75	2450.02	2030.24	1808.5	1419.46
AT1G18510	TCV > Mock = NES	0.000143532	11.063	6.34962	3.92843	38.3964	21.8261	0	0	0	0	0.757011	0
AT1G18520	TCV > Mock = NES	0.203376	7.70979	7.70979	0	6.25058	0	0	0	0	0	0	0
AT1G18530	TCV = Mock = NES	0.659102	-2.13053	-1.54675	1.96422	0	0	1.1345	5.91123	1.65653	0.876615	0.757011	4.16264
AT1G18540	TCV < Mock = NES	0.000152539	-1.13934	-1.28003	2404.2	2247.53	2824.11	4631.03	6877.12	4959.67	6833.21	7311.97	4009.45
AT1G18550	TCV < Mock = NES	1.11022e-16	-1.16105	-1.00634	142.406	106.26	153.732	305.18	276.645	318.055	255.972	254.356	298.045
AT1G18560	TCV > Mock = NES	5.2508e-12	0.627798	0.424206	303.472	352.711	325.494	213.286	203.346	218.663	234.056	253.599	243.931
AT1G18570	TCV > Mock > NES	2.88658e-15	3.03898	1.15685	2603.57	1589.43	2097.2	271.145	250.636	243.511	1130.83	982.601	707.648
AT1G18580	TCV = Mock = NES	0.959225	-0.0612416	-0.066238	634.442	620.594	592.152	686.372	639.595	601.322	587.332	646.488	700.156
AT1G18590	TCV = Mock < NES	3.28847e-06	-0.163026	-1.07495	1553.7	1217.08	1020.13	1929.78	853.581	1461.06	2471.18	2492.08	3022.91
AT1G18600	TCV = Mock > NES	1.11022e-16	0.157881	0.634715	560.784	623.272	550.398	510.525	510.73	533.404	355.029	347.468	414.599
AT1G18610	TCV < Mock < NES	0	-1.66668	-0.931899	194.457	201.805	237.24	579.729	709.347	722.249	380.451	452.693	375.47
AT1G18620	TCV < Mock < NES	1.11022e-16	-2.32835	-1.22136	190.529	357.176	282.79	1283.12	1728.44	1159.57	734.603	687.366	514.502
AT1G18630	TCV = Mock = NES	0.990056	0.00203724	-0.0121696	255.348	286.634	279.944	284.759	282.557	253.45	245.452	277.066	306.37
AT1G18640	TCV < Mock = NES	0.0289709	-0.462593	-0.391047	531.321	503.618	592.152	673.892	831.119	737.158	648.695	636.647	848.346
AT1G18650	TCV < Mock < NES	0	-3.80947	-1.85724	46.1591	45.54	94.8961	702.255	1062.84	851.459	213.894	190.01	272.237
AT1G18660	TCV = NES < Mock	2.53305e-10	-0.793439	0.0486105	1946.54	2012.69	1849.53	3639.47	2838.57	3589.71	1774.27	1628.33	2213.69
AT1G18670	TCV < Mock = NES	1.89848e-14	-0.930266	-0.935113	264.187	308.957	337.83	451.531	621.861	662.614	573.306	570.787	597.755
AT1G18680	TCV = Mock < NES	0	-0.0280544	-1.0478	192.493	156.265	157.528	181.52	177.337	157.371	365.548	357.309	323.853
AT1G18690	TCV > Mock = NES	1.11022e-16	0.896122	0.825012	436.056	542.015	443.165	254.128	249.454	260.076	255.972	257.384	288.887
AT1G18700	TCV > Mock > NES	0	1.03381	0.524431	1962.25	1806.42	1843.83	1010.84	802.745	927.66	1225.51	1277.84	1398.65
AT1G18710	TCV = Mock < NES	0.00118319	-0.250383	-2.32926	23.5706	99.1164	39.8564	91.8944	73.2992	28.1611	368.178	308.104	140.697
AT1G18720	TCV > Mock = NES	0	1.57286	1.84329	5106.96	4950.46	4056.81	1725.57	1559.38	1459.41	1125.57	1162.77	1645.07
AT1G18730	TCV < Mock < NES	0	-4.20782	-2.39775	440.967	488.438	422.288	8279.57	9353.93	7345.08	2225.72	2171.87	2725.7
AT1G18740	NES < TCV < Mock	1.13545e-08	-0.901845	0.722779	10084.3	5632.67	7028.01	17195.6	13860.6	11441.7	4731.09	5229.43	3821.3
AT1G18750	TCV < Mock < NES	0	-1.74554	-0.507099	434.092	284.848	344.473	1219.59	1175.15	1171.17	518.079	517.039	476.206
AT1G18760	TCV = Mock = NES	0.971691	-7.06008	0	0	0	0	1.1345	1.18225	1.65653	0	0	0
AT1G18773	Mock < TCV < NES	0	1.4066	-0.664882	123.746	132.155	160.374	68.0699	59.1123	29.8176	252.465	212.72	194.811
AT1G18780	TCV = Mock = NES	0.982504	6.99854	2.08109	1.96422	0.89294	0.948961	0	0	0	0.876615	0	0
AT1G18800	TCV < Mock = NES	0.178561	-0.567929	-1.02774	581.408	558.088	643.396	794.149	982.446	866.368	1422.75	1532.95	679.342
AT1G18810	TCV < Mock < NES	1.11022e-16	-2.63578	-1.24636	332.935	383.964	296.076	1930.92	2506.36	1858.63	817.005	906.9	679.342
AT1G18830	TCV > Mock = NES	7.62427e-09	3.74036	2.41448	9.82109	19.6447	15.1834	0	0	3.31307	3.50646	1.51402	3.33011
AT1G18835	TCV = Mock = NES	0.992956	-0.369991	5.91956	0	1.78588	0	1.1345	1.18225	0	0	0	0
AT1G18840	TCV < Mock = NES	-2.22045e-16	-1.7982	-1.71272	215.082	736.676	563.683	1586.03	1782.83	1901.7	1378.04	1682.84	1906.49
AT1G18850	TCV = Mock < NES	0.032713	-0.446205	-1.54448	338.827	303.6	360.605	392.537	545.015	429.043	1239.53	1180.18	506.177
AT1G18860	TCV > Mock = NES	-2.22045e-16	15.4733	8.10707	406.593	534.871	423.237	0	0	0	0	0.757011	4.16264
AT1G18870	TCV < Mock < NES	0	-3.25765	-1.27788	17.678	32.1459	12.3365	204.21	170.243	220.319	42.0775	45.4207	63.2721
AT1G18880	TCV < Mock = NES	0.348824	-0.4521	-0.542439	49.1054	81.2844	57.9056	78.2804	65.0235	114.301	83.2784	105.225	85.7503
AT1G18890	TCV > Mock = NES	2.61346e-13	1.27061	1.35583	5125.62	3646.74	3914.45	2060.25	1768.64	1429.59	1944.33	1531.43	1481.07
AT1G18900	TCV < Mock = NES	0.000196622	-0.550783	-0.679995	1072.46	917.05	1174.81	1673.39	1283.92	1678.07	1874.2	1808.5	1386.99
AT1G18910	TCV > Mock = NES	0.180573	0.397381	0.323855	916.307	843.829	831.29	734.021	484.721	748.754	587.332	689.637	793.399
AT1G18940	TCV = Mock = NES	0.767699	-0.407899	0.086093	29.4633	48.2188	23.724	45.38	54.3833	34.7872	33.3114	27.2524	34.9662
AT1G18950	TCV < Mock = NES	0.00414547	-0.167563	-0.162215	1262.01	1219.76	1322.85	1457.83	1447.07	1368.3	1489.37	1428.48	1339.54
AT1G18960	TCV > Mock = NES	3.64796e-06	6.80351	5.74783	31.4275	76.7929	21.8261	1.1345	0	0	0.876615	1.51402	0
AT1G18970	TCV = Mock = NES	0.981639	5.98872	5.98872	0.982109	0.89294	0	0	0	0	0	0	0
AT1G18975	TCV = Mock = NES	0.980904	5.02822	5.02822	0	0	0.948961	0	0	0	0	0	0
AT1G18980	TCV > Mock > NES	1.11022e-16	12.2595	3.56628	34.3738	64.2917	48.397	0	0	0	7.01292	4.54207	0.832528
AT1G18990	TCV > Mock = NES	0.0240842	4.80748	3.85132	116.871	834.006	276.148	15.883	21.2804	6.62614	40.3243	36.3365	8.32528
AT1G19000	TCV > NES > Mock	4.9627e-14	0.313382	0.843643	5527.31	5786.25	5071.25	4500.56	5128.58	3556.58	3308.34	2904.65	2917.18
AT1G19010	TCV = Mock = NES	0.403753	-0.194697	0.26725	309.364	266.096	271.403	280.221	417.333	271.672	234.056	241.487	228.113
AT1G19020	TCV > Mock = NES	0.00397413	2.20973	2.1459	6760.84	2570.78	3878.4	1279.72	1022.64	553.283	1478.85	751.712	754.27
AT1G19025	TCV > Mock = NES	0.128914	1.67536	1.79329	243.563	918.836	459.297	170.175	186.795	150.745	161.297	190.01	116.554
AT1G19040	TCV = Mock = NES	0.979381	4.9432	4.9432	0	0.89294	0	0	0	0	0	0	0
AT1G19050	TCV < Mock < NES	-2.22045e-16	-4.0224	-2.93642	257.312	64.2917	297.025	3295.72	4251.35	2506.34	1523.56	1498.13	1714.17
AT1G19060	TCV = Mock < NES	0.0118856	5.02822	-3.92633	0	0	0.948961	0	0	0	7.88953	5.29908	1.66506
AT1G19070	TCV < Mock = NES	0.260231	-1.29487	-1.13765	2.94633	5.35764	9.48961	18.152	10.6402	14.9088	13.1492	6.05609	19.9807
AT1G19080	TCV < Mock < NES	0	-1.29014	-0.64021	157.323	166.817	187.648	441.837	440.159	369.631	263.851	261.108	272.709
AT1G19100	TCV = NES < Mock	6.03961e-14	-0.500659	0.0293318	362.398	343.782	378.636	502.583	523.735	508.556	311.198	392.132	359.652
AT1G19110	TCV = NES < Mock	1.11022e-16	-0.52756	-0.0499316	1759.94	1631.4	1595.2	2284.88	2444.88	2458.3	1798.81	1711.6	1651.73
AT1G19115	TCV > Mock = NES	3.16192e-13	4.79752	6.70698	33.3917	84.8293	58.8356	1.1345	3.54674	1.65653	0	0	1.66506
AT1G19120	TCV < Mock = NES	1.22125e-15	-0.717905	-0.63796	585.337	541.122	677.558	949.576	1106.58	911.094	941.484	875.105	990.708
AT1G19130	TCV = NES > Mock	1.87445e-08	0.411551	0.0561411	1126.48	984.913	1134.96	808.898	772.006	859.742	1022.13	1011.37	1088.95
AT1G19140	TCV = NES < Mock	4.15329e-10	-0.620275	0.0121848	891.755	758.106	933.778	1454.43	1302.83	1214.24	792.46	797.89	971.56
AT1G19150	TCV < Mock < NES	0	-5.41992	-2.91182	85.4434	70.5423	222.057	5352.57	5431.24	5401.96	884.504	808.488	1152.22
AT1G19160	TCV = Mock = NES	0.954878	0.360318	-0.10354	24.5527	30.36	29.4178	29.497	21.2804	14.9088	27.1751	40.1216	23.3108
AT1G19170	TCV > Mock = NES	1.25057e-05	0.179439	0.402745	461.591	448.256	484.919	391.402	399.599	440.638	330.484	381.534	343.001
AT1G19180	TCV = Mock > NES	0.17561	0.100673	1.2551	5113.84	3799.46	3226.47	6280.59	2976.89	2064.04	2110.89	1704.79	1270.44
AT1G19190	TCV > Mock = NES	0.000268603	5.75322	3.91429	90.354	346.461	130.957	3.4035	7.09347	0	12.2726	12.8692	12.4879
AT1G19200	TCV > Mock = NES	4.55045e-11	1.78701	2.38431	141.424	75.8999	107.233	30.6315	31.9206	31.4742	21.0388	21.9533	19.1481
AT1G19210	TCV = Mock > NES	0.0906567	-1.34071	1.49182	320.167	256.274	181.252	1217.32	418.515	283.267	134.122	87.8133	47.4541
AT1G19220	TCV > Mock = NES	0.000490019	0.716957	0.667418	409.539	276.812	417.543	216.689	224.627	230.258	214.771	218.019	262.246
AT1G19230	TCV > Mock = NES	0.0252505	2.39524	1.3261	29.4633	20.5376	7.59169	4.538	4.72898	1.65653	7.88953	7.57011	7.49275
AT1G19240	TCV = NES > Mock	1.11022e-16	1.52925	-0.122188	331.953	268.775	314.106	106.643	107.584	102.705	376.068	331.571	288.055
AT1G19250	TCV = NES > Mock	6.01741e-14	16.6046	0.738561	810.24	915.264	1264.02	0	0	0	1272.84	256.627	262.246
AT1G19260	TCV = Mock = NES	0.991584	-5.33658	-4.84554	0	0	0	0	1.18225	0	0	0	0.832528
AT1G19270	TCV > Mock = NES	0	1.24297	0.98688	1204.07	992.95	1032.47	540.022	344.033	480.395	551.391	526.123	551.966
AT1G19290	TCV = NES > Mock	0.0149923	2.70348	0.470749	1121.57	3334.24	1551.55	319.929	232.902	369.407	1737.45	1611.68	985.713
AT1G19300	TCV = Mock > NES	0.0465753	-0.0353035	0.931364	447.841	850.079	514.337	817.974	494.179	545	305.062	317.188	328.016
AT1G19310	TCV > Mock > NES	1.11022e-16	2.83931	1.49776	698.279	556.302	559.887	90.7599	81.5749	81.1702	217.4	195.309	229.778
AT1G19320	TCV = Mock = NES	0.716863	-1.68574	0.300239	1.96422	0	0	0	4.72898	1.65653	0	0.757011	0.832528
AT1G19330	TCV < Mock = NES	0.222636	-0.538334	-0.424888	335.881	327.709	331.187	554.77	374.772	515.182	377.821	398.188	559.459
AT1G19340	TCV = Mock = NES	0.993735	0.326171	0.192148	168.923	129.476	143.293	125.929	108.767	117.614	120.096	132.477	134.037
AT1G19350	TCV = NES < Mock	3.23773e-11	-0.732505	-0.00408528	1260.05	1377.82	1335.19	1964.95	2569.02	2067.36	1259.7	1296	1428.62
AT1G19360	TCV > Mock > NES	1.11022e-16	0.711587	0.380604	1718.69	1460.85	1505.05	956.383	918.605	985.638	1157.13	1249.83	1191.35
AT1G19370	TCV = Mock < NES	0	0.0856377	-2.06131	207.225	158.943	150.885	150.888	177.337	159.027	671.487	770.638	715.974
AT1G19380	NES < TCV < Mock	1.58656e-11	-0.795754	1.32748	1433.88	539.336	1115.98	1892.34	1936.52	1533.95	511.066	403.487	316.36
AT1G19390	TCV = Mock = NES	0.99346	-6.55512	-6.35289	0	0	0	1.1345	0	1.65653	0	0.757011	1.66506
AT1G19394	TCV > Mock = NES	4.44089e-16	2.70428	1.58644	35.3559	44.647	47.4481	7.94149	8.27572	3.31307	15.7791	10.5982	16.0428
AT1G19396	TCV > Mock > NES	1.02569e-10	1.38533	0.705172	147.316	139.299	120.518	51.0525	65.0235	39.7568	102.564	66.617	80.5304
AT1G19397	TCV > Mock > NES	1.96173e-06	1.0829	0.513841	425.253	383.071	441.267	223.496	205.711	160.684	286.653	226.346	362.149
AT1G19400	TCV = NES < Mock	0	-1.16205	-0.133958	2759.72	2085.91	2303.13	5099.57	5419.41	5478.16	2876.17	2473.91	2494.25
AT1G19410	TCV = Mock = NES	0.784732	-5.33658	-7.56679	0	0	0	0	1.18225	0	2.62984	3.02805	0
AT1G19430	TCV = NES < Mock	1.00348e-05	-0.390412	0.128782	910.415	774.179	878.738	1089.12	1185.79	1085.03	682.006	760.796	901.627
AT1G19440	TCV < Mock < NES	0	-1.63987	-1.16843	380.076	520.584	493.46	1167.4	1635.05	1542.23	1051.94	973.517	1108.09
AT1G19450	TCV < Mock < NES	0	-3.23866	-0.851757	1122.55	954.553	955.604	9401.59	10766.7	8458.27	1811.09	1679.81	1982.25
AT1G19460	TCV = Mock = NES	0.991584	-5.33658	-4.84554	0	0	0	0	1.18225	0	0	0	0.832528
AT1G19470	TCV > Mock > NES	0.0999084	3.71274	1.22925	3.92843	23.2164	10.4386	0	1.18225	1.65653	11.396	3.78506	0.832528
AT1G19480	TCV = Mock = NES	0.999068	-0.0895478	-0.15429	239.634	221.449	216.363	259.8	234.085	226.945	261.231	252.085	240.6
AT1G19485	TCV > NES > Mock	0	0.270524	0.703335	1056.75	966.161	891.075	787.342	813.385	815.015	611	603.338	575.277
AT1G19490	TCV < Mock < NES	0	-1.73553	-0.781072	645.245	623.272	669.967	2101.09	1856.13	2498.05	1177.29	1067.39	1086.45
AT1G19500	TCV = Mock = NES	0.63432	0.538262	8.70765	6.87476	0.89294	4.74481	3.4035	3.54674	1.65653	0	0	0
AT1G19510	TCV > Mock = NES	2.09021e-09	4.00514	3.28474	408.557	170.552	402.36	31.766	17.7337	11.5957	39.4477	28.7664	32.4686
AT1G19520	TCV < Mock = NES	1.04164e-09	-0.984225	-0.910902	682.565	515.227	828.443	1293.33	1358.4	1356.7	1329.82	1461.79	1018.18
AT1G19530	TCV > Mock = NES	-2.22045e-16	11.7771	11.7771	44.1949	25.0023	36.0605	0	0	0	0	0	0
AT1G19540	TCV = Mock > NES	8.72572e-07	-0.207272	1.95846	29.4633	13.3941	21.8261	23.8245	26.0094	24.848	0.876615	9.08414	6.66022
AT1G19550	TCV = NES < Mock	0.218368	-4.33092	-2.4767	0	0.90812	0	8.99431	6.02709	3.82825	1.96274	1.539	1.69003
AT1G19565	TCV > NES > Mock	0.00159124	3.0381	5.24255	15.7137	57.1482	17.0813	4.538	4.72898	1.65653	0	1.51402	0.832528
AT1G19570	TCV = Mock = NES	0.883817	-0.174104	0.423924	4891.88	4799.54	3813.88	7241.59	3368.1	4627.84	3369.5	3442.11	3255.16
AT1G19580	TCV < Mock = NES	1.11022e-16	-0.521512	-0.448944	774.884	784.002	823.698	1176.48	1150.32	1093.31	1059.83	1055.27	1137.23
AT1G19600	TCV = NES > Mock	0.00171165	0.573737	-0.220037	1390.67	1083.14	1276.35	769.19	905.6	844.833	1607.71	1605.62	1154.72
AT1G19610	TCV > Mock = NES	6.95264e-11	6.01833	5.6409	601.05	598.27	175.558	13.614	5.91123	1.65653	17.5323	8.32712	1.66506
AT1G19620	TCV = Mock = NES	0.640769	-0.731467	0.618339	12.7674	16.0729	12.3365	27.228	21.2804	19.8784	7.88953	10.5982	8.32528
AT1G19630	TCV = Mock = NES	0.600999	-0.875582	-0.708893	41.2486	71.4352	33.2136	80.5494	33.1029	154.058	52.5969	81.0002	104.898
AT1G19640	TCV < Mock < NES	5.83797e-09	-4.47349	-2.44003	52.0518	53.5764	35.1116	1603.05	631.319	892.872	228.796	227.86	307.203
AT1G19650	NES < TCV < Mock	9.65199e-05	-0.483668	0.459561	1059.7	1387.63	851.218	1713.09	1312.29	1586.96	784.57	802.432	811.714
AT1G19660	TCV > Mock > NES	0	2.14497	1.54174	14778.8	15149.6	12739.8	4599.26	2211.98	2835.99	4077.14	3830.48	6747.64
AT1G19670	TCV < Mock < NES	0.000643906	-4.30501	-1.88159	279.901	383.964	391.921	12026.8	4201.7	4641.61	1340.34	1359.59	1190.51
AT1G19680	Mock < TCV < NES	0	0.631442	-1.74548	1228.62	1426.03	1303.87	947.307	839.394	768.632	4397.1	4800.93	4075.22
AT1G19690	TCV = Mock = NES	0.747908	0.4377	1.35266	178.744	1064.38	395.717	422.034	401.963	385.973	177.076	174.907	289.72
AT1G19700	TCV = Mock > NES	0	-0.208214	0.789632	5218.92	5126.37	4483.84	6016.25	4942.97	6172.25	2822.7	2514.79	3241.03
AT1G19710	TCV < Mock = NES	0	-1.49409	-1.59477	414.45	344.675	441.267	1169.67	1093.58	1118.16	1023.89	1190.78	1411.13
AT1G19715	TCV = Mock = NES	0.804002	-0.35568	0.0848908	2120.37	3464.61	2289.84	3403.5	3033.64	3639.41	2762.21	2390.64	2271.97
AT1G19720	TCV < Mock = NES	0	-1.49147	-1.52188	1756.99	1642.12	1867.56	4756.95	4212.34	5839.29	5575.27	5368.72	4180.12
AT1G19730	TCV = NES > Mock	-2.22045e-16	0.915557	-0.0493672	510.696	647.382	542.806	294.97	333.393	273.328	617.137	560.188	582.769
AT1G19740	TCV > Mock = NES	2.41651e-12	1.10527	0.924522	2747.94	2756.51	2498.62	1306.94	1265	1147.98	1151.87	1176.4	1888.17
AT1G19750	TCV > Mock > NES	2.85888e-09	5.13043	2.59822	108.146	207.483	104.59	2.269	4.72898	4.9696	29.8058	30.3281	9.23689
AT1G19770	NES < TCV < Mock	0	-0.963872	0.890614	3985.4	2904.73	3417.21	7092.89	7701.15	5310.85	1861.05	2098.44	1600.12
AT1G19780	TCV = Mock = NES	0.982932	-0.775946	-1.2868	0.982109	2.67882	0	2.269	2.36449	1.65653	0.876615	2.27103	5.82769
AT1G19790	TCV = Mock = NES	0.652118	-2.27841	-2.33217	0	0.89294	0	1.1345	0	3.31307	0	3.78506	0.832528
AT1G19800	TCV = NES < Mock	0	-1.09498	-0.170132	644.263	722.389	561.785	1253.62	1457.71	1408.05	696.909	707.806	765.093
AT1G19830	TCV < Mock = NES	0.00107615	-2.68766	-2.53564	0	0	5.69377	12.4795	9.45796	14.9088	6.1363	12.8692	14.153
AT1G19835	TCV < Mock < NES	0	-2.27464	-1.28942	891.755	796.503	1408.26	4536.86	5119.12	5327.42	2200.3	2491.32	2877.22
AT1G19840	TCV = NES < Mock	5.34062e-12	-1.66534	-0.728694	23.5706	23.2164	26.5709	72.6079	83.9394	76.2006	41.2009	28.7664	51.6167
AT1G19850	TCV = Mock < NES	1.26053e-07	-0.285151	-0.814831	489.09	497.368	515.286	618.302	563.931	647.705	796.843	1043.16	801.724
AT1G19860	TCV = Mock = NES	0.929356	0.050743	0.231444	822.025	1459.96	821.8	987.014	982.446	1027.05	954.633	952.32	736.787
AT1G19870	TCV = Mock = NES	0.959057	0.0244336	-0.0536877	2868.74	2769.9	2982.59	2831.71	2846.85	2797.89	2735.04	2980.35	3232.7
AT1G19880	TCV > NES > Mock	1.11022e-16	0.344988	0.749541	1458.43	1412.63	1468.99	1059.62	1275.64	1081.72	845.933	887.974	847.513
AT1G19900	TCV = Mock = NES	0.984232	0	-4.91746	0	0	0	0	0	0	0.876615	0	0
AT1G19910	TCV > Mock > NES	0	1.19603	0.814843	7571.07	7014.05	7606.87	3228.78	3372.95	3084.47	3988.6	4112.09	4514.8
AT1G19920	TCV < Mock < NES	1.11022e-16	-2.18024	-1.52492	2125.28	1999.29	2312.62	9395.92	10516.1	9263.34	5464.82	6286.98	6772.61
AT1G19930	TCV > Mock = NES	0.00325597	9.83789	9.83789	3.92843	18.7517	4.74481	0	0	0	0	0	0
AT1G19940	TCV < Mock < NES	-2.22045e-16	-3.90527	-1.83585	2.94633	4.4647	92.0492	412.958	567.478	510.213	84.155	121.122	149.855
AT1G19950	TCV < Mock < NES	-2.22045e-16	-3.03463	-1.02038	40.2664	53.5764	44.6012	385.73	338.122	410.821	76.2655	77.2152	127.377
AT1G19960	TCV = Mock = NES	0.934392	-0.641884	0.314744	557.838	1402.81	577.917	952.979	450.435	2557.69	570.676	625.291	845.015
AT1G19970	TCV < Mock < NES	0	-3.43381	-2.73524	60.8907	50.0047	94.8961	670.489	751.908	801.763	429.541	448.908	492.024
AT1G19980	TCV = Mock = NES	0.717057	-0.194896	-0.187588	329.006	273.24	325.494	399.344	309.748	352.842	369.055	327.029	360.484
AT1G19990	TCV < Mock = NES	1.95081e-11	-1.32736	-1.5862	207.225	241.094	221.108	537.753	708.165	434.012	736.356	760.039	513.669
AT1G20000	TCV > Mock = NES	0.0547385	8.42817	3.71482	0.982109	2.67882	6.64273	0	0	0	0	0.757011	0
AT1G20010	TCV < Mock = NES	1.56541e-14	-2.67887	-1.96629	224.903	89.294	308.412	1038.07	1824.2	1124.79	757.395	853.909	821.705
AT1G20020	TCV < Mock < NES	0	-3.36281	-1.75371	2579.02	1792.13	2314.52	24370.2	24304.6	20103.7	6699.97	6899.4	8946.34
AT1G20030	TCV > Mock = NES	6.14517e-09	2.2905	2.31503	46.1591	56.2552	27.5199	10.2105	4.72898	11.5957	7.01292	9.08414	9.99033
AT1G20050	Mock < TCV < NES	1.11022e-16	0.430871	-0.959068	1939.66	1786.77	1933.03	1292.19	1365.49	1540.58	3630.06	3853.19	3519.09
AT1G20060	TCV < Mock = NES	2.90839e-08	-1.5659	-0.984953	25.5348	21.4306	23.724	72.6079	55.5655	81.1702	46.4606	47.6917	45.789
AT1G20065	TCV = Mock < NES	0.062441	-6.87815	-8.84212	0	0	0	1.1345	2.36449	0	5.25969	6.8131	1.66506
AT1G20070	TCV > Mock = NES	0.00089964	1.22235	1.49265	1142.19	698.279	594.999	486.7	258.912	298.176	272.627	266.468	326.351
AT1G20080	TCV = Mock = NES	0.996743	-0.707547	-0.212291	9.82109	8.03646	16.1323	23.8245	11.8225	19.8784	14.0258	12.8692	12.4879
AT1G20090	TCV < Mock < NES	1.71648e-08	-1.47821	-0.71571	1199.15	1042.95	1467.09	2815.83	4387.31	3130.85	1925.05	1997	2169.57
AT1G20100	TCV = Mock = NES	0.966112	-0.121553	-0.0112655	3776.21	2811.87	3142.96	3267.36	3888.41	3430.68	3831.68	3324.04	2651.6
AT1G20110	TCV > Mock = NES	0	1.70054	1.6588	6225.59	5358.53	5185.12	1730.11	1663.42	1765.87	1719.04	1641.2	1950.61
AT1G20120	TCV > Mock = NES	2.09291e-11	4.50004	4.68114	511.679	1176	649.09	41.9765	33.1029	28.1611	37.6944	24.2244	29.1385
AT1G20130	TCV = Mock > NES	0.0386763	0.542092	3.80467	4.91054	10.7153	7.59169	9.07599	3.54674	3.31307	0.876615	0.757011	0
AT1G20132	TCV = Mock = NES	0.50501	5.91956	5.91956	0	1.78588	0	0	0	0	0	0	0
AT1G20140	TCV > Mock > NES	-2.22045e-16	2.26166	0.772746	663.905	695.601	745.884	122.526	169.061	147.432	525.969	439.067	267.241
AT1G20150	TCV > Mock = NES	0.00276985	4.33933	10.6289	0.982109	30.36	16.1323	1.1345	1.18225	0	0	0	0
AT1G20160	TCV > Mock > NES	-2.22045e-16	3.10985	1.15839	1757.97	2830.62	2387.59	340.35	167.879	299.833	1175.54	1009.1	940.756
AT1G20180	TCV > Mock > NES	7.61161e-08	6.77702	2.07613	61.8728	25.0023	40.8053	1.1345	0	0	13.1492	12.1122	4.99517
AT1G20190	TCV < Mock < NES	1.11022e-16	-3.3986	-2.00189	43.2128	44.647	148.038	571.788	1000.18	916.064	369.055	261.169	314.695
AT1G20200	TCV > Mock > NES	1.11022e-16	1.1138	0.636023	2912.93	3109.22	3056.6	1371.61	1402.14	1421.31	1833	1831.97	2177.06
AT1G20220	TCV = NES < Mock	0.00476263	-0.722818	-0.0370949	1320.94	1209.93	1270.66	1761.88	2494.54	2017.66	1593.69	1361.11	945.751
AT1G20225	TCV > Mock = NES	0	1.72591	1.7001	3065.16	2577.92	2342.99	829.319	748.361	836.55	774.051	713.862	969.895
AT1G20230	TCV = Mock < NES	2.66799e-10	0.000605412	-0.913728	56.9623	75.8999	84.4576	76.0114	73.2992	67.9179	158.667	123.393	127.377
AT1G20260	TCV < Mock < NES	1.11022e-16	-0.8329	-0.379898	4090.48	4126.01	3928.7	6871.06	7672.77	7089.97	4882.74	5009.9	5911.29
AT1G20270	TCV = Mock = NES	0.474369	0.30278	0.168536	692.387	622.379	762.016	587.671	526.099	569.848	583.825	565.487	698.491
AT1G20280	TCV > Mock = NES	4.80559e-06	9.48258	4.56513	4.91054	8.9294	7.59169	0	0	0	0.876615	0	0
AT1G20300	TCV < Mock = NES	0.000303105	-0.7621	-0.926349	329.006	252.702	280.893	502.583	496.543	463.83	634.669	627.562	377.135
AT1G20310	TCV < Mock < NES	0.000304351	-2.0765	-0.827348	85.4434	67.8635	67.3762	415.227	258.912	256.763	210.388	144.589	36.6312
AT1G20320	TCV = Mock = NES	0.991081	-2.54355	-2.76868	0	0	0.948961	0	2.36449	3.31307	2.62984	1.51402	2.49758
AT1G20330	TCV = Mock > NES	0.00258257	-0.485704	0.606927	3188.91	2981.53	4230.47	3535.1	5913.59	5115.38	2131.93	2202.15	2495.09
AT1G20340	TCV = NES < Mock	0	-2.77695	-0.315974	16529.9	15214.8	15945.4	101973	122554	102341	18893.7	16657.3	23816.1
AT1G20350	TCV > Mock > NES	0	5.8076	3.10187	923.182	550.944	691.793	14.7485	10.6402	13.2523	120.096	68.888	63.2721
AT1G20360	TCV = Mock = NES	0.980904	5.02822	5.02822	0	0	0.948961	0	0	0	0	0	0
AT1G20370	TCV < Mock = NES	1.44506e-05	-0.803164	-1.47165	332.935	325.923	395.717	564.981	682.156	593.039	1130.83	1136.27	657.697
AT1G20380	TCV = NES > Mock	7.77156e-16	0.72898	-0.146753	309.364	381.286	306.514	192.865	219.898	188.845	371.685	379.263	352.992
AT1G20400	TCV > Mock = NES	0.42476	7.98032	7.98032	1.96422	1.78588	3.79585	0	0	0	0	0	0
AT1G20405	TCV = Mock = NES	0.991253	-0.393372	4.9432	0	0.89294	0	0	1.18225	0	0	0	0
AT1G20410	TCV = NES > Mock	1.9329e-13	0.537666	0.0570056	494.001	534.871	501.052	308.584	392.505	352.842	497.917	505.684	467.048
AT1G20430	TCV = NES > Mock	1.19095e-11	0.755309	-0.17437	805.329	674.17	858.81	409.554	569.842	405.851	839.797	936.423	862.499
AT1G20440	TCV > NES > Mock	0	1.54403	2.63762	15693.1	10209	11819.3	4676.41	5042.28	3216.99	1991.67	1797.9	2271.97
AT1G20450	TCV = NES < Mock	0.000827436	-1.08788	0.292059	10343.6	7983.78	8232.24	26223.9	15823.2	14408.5	7289.05	6096.97	8306.13
AT1G20460	Mock < TCV < NES	0	1.18926	-0.726769	743.456	725.068	769.608	327.87	315.66	337.933	1136.09	1273.29	1294.58
AT1G20470	TCV = NES < Mock	5.40502e-09	-2.17597	-0.233783	45.177	122.333	55.9887	440.186	235.267	334.62	72.759	81.0002	109.061
AT1G20480	TCV < Mock = NES	0.304971	-1.18968	-0.689144	16.6958	16.0729	17.0813	34.035	44.9253	34.7872	22.792	23.4674	34.1336
AT1G20490	TCV < Mock < NES	7.48804e-06	-2.16045	-0.658517	11.7853	24.1094	15.1834	90.7599	44.9253	92.766	20.1621	36.3365	24.1433
AT1G20500	TCV > Mock = NES	0.0018726	6.41084	11.6894	7.85687	74.114	17.0813	1.1345	0	0	0	0	0
AT1G20510	TCV = Mock > NES	0.0555531	-0.524882	0.835627	4279.05	3885.18	3280.56	8236.46	4085.84	4144.65	2266.93	1885.72	2260.31
AT1G20520	TCV = Mock < NES	0.0178628	-0.563517	-3.50238	0	2.67882	0	1.1345	1.18225	1.65653	12.2726	15.8972	2.49758
AT1G20530	TCV < Mock = NES	0.108008	-1.39325	-1.21911	7.85687	8.9294	7.59169	22.69	24.8272	16.5653	14.0258	21.9533	20.8132
AT1G20540	TCV < NES < Mock	0	-0.571998	-1.01468	492.036	385.75	395.717	637.589	636.048	619.544	818.758	866.021	888.307
AT1G20550	TCV < Mock = NES	9.11182e-12	-1.49076	-1.50498	101.157	81.2576	97.743	351.695	235.267	200.441	291.913	279.337	223.95
AT1G20560	TCV = NES > Mock	0.0228598	0.800159	0.298844	1194.24	1868.92	1339.93	804.36	785.011	939.255	1199.21	1194.56	1185.52
AT1G20570	TCV > Mock = NES	0.0758534	3.56223	3.47628	114.907	863.473	284.688	28.3625	35.4674	43.0699	37.6944	41.6356	34.1336
AT1G20575	TCV > Mock = NES	0.000224721	0.274136	0.275621	713.993	692.922	732.598	630.782	610.039	528.435	558.404	565.487	643.544
AT1G20580	TCV > Mock = NES	0	0.478447	0.578402	1107.82	1174.22	1124.52	791.88	912.693	740.471	808.239	763.824	709.313
AT1G20590	TCV = Mock = NES	0.980087	5.04166	5.04166	0	0.958125	0	0	0	0	0	0	0
AT1G20600	TCV = Mock = NES	0.981731	5.07905	5.07905	0.984073	0	0	0	0	0	0	0	0
AT1G20610	TCV < Mock = NES	0	-3.45489	-3.37093	8.83898	21.3654	13.2855	198.537	147.781	130.866	126.233	190.767	133.204
AT1G20620	TCV > Mock = NES	0	2.92674	2.09203	240292	168818	164019	29081.8	17921.7	28369.8	55009.3	39524.3	39893.9
AT1G20630	TCV > Mock = NES	8.41538e-06	3.06216	2.54328	3554.25	7390.87	3768.33	656.875	508.366	596.353	784.57	688.88	1050.65
AT1G20640	TCV < Mock = NES	0	-0.664263	-0.697417	1066.57	773.795	940.421	1527.04	1374.06	1505.79	1443.78	1525.38	1540.18
AT1G20650	TCV < Mock < NES	0	-2.69855	-1.10522	529.356	403.993	467.838	2962.18	2915.12	3218.65	999.341	997.741	1017.35
AT1G20670	NES < TCV < Mock	0.000381846	-0.189458	0.274986	711.047	567.91	550.398	706.793	719.987	659.301	490.028	514.011	507.842
AT1G20680	TCV = Mock = NES	0.497723	1.13751	0.967814	3.92843	11.6082	0	1.1345	5.91123	0	2.62984	5.29908	0
AT1G20683	TCV = Mock = NES	0.979381	4.9432	4.9432	0	0.89294	0	0	0	0	0	0	0
AT1G20687	TCV = Mock = NES	0.979381	4.9432	4.9432	0	0.89294	0	0	0	0	0	0	0
AT1G20690	TCV = Mock = NES	0.613786	1.97652	1.31924	3.92843	2.67882	0	0	0	1.65653	2.62984	0	0
AT1G20693	TCV > Mock > NES	0	2.77679	1.41309	12120.2	8196.3	8655.48	1500.94	1288.65	1437.87	4155.15	3299.81	3424.19
AT1G20696	TCV > Mock = NES	0	1.25698	0.926542	7135.02	6503.28	5722.24	3033.65	2477.99	2589.16	3383.73	2966.73	3835.45
AT1G20700	TCV > Mock = NES	1.76201e-10	7.869	7.90833	99.193	438.434	243.883	0	0	3.31307	0.876615	1.51402	0.832528
AT1G20710	TCV > Mock = NES	8.47927e-07	11.0702	11.0702	6.87476	34.8247	22.7751	0	0	0	0	0	0
AT1G20720	TCV < Mock < NES	-2.22045e-16	-2.57417	-1.34019	25.5348	49.1117	29.4178	203.075	199.799	217.006	79.7719	93.8369	89.913
AT1G20730	TCV = Mock = NES	0.917489	7.53286	1.84728	0	2.67882	2.84688	0	0	0	0	1.51402	0
AT1G20735	TCV = Mock = NES	0.980936	0	-4.71335	0	0	0	0	0	0	0	0.757011	0
AT1G20740	TCV = Mock = NES	0.641389	8.15791	-0.0370881	4.91054	2.67882	0.948961	0	0	0	2.62984	5.29908	0.832528
AT1G20750	TCV = Mock = NES	0.659516	1.94969	-0.120468	1.96422	3.57176	0.948961	0	0	1.65653	1.75323	5.29908	0
AT1G20760	TCV > Mock > NES	1.11022e-16	1.27368	0.39755	3270.42	3274.41	3469.4	1422.66	1203.53	1515.73	2454.52	2376.26	2771.48
AT1G20770	TCV < NES < Mock	0	-0.401869	-0.760857	536.231	441.113	530.469	639.858	729.445	622.857	866.972	887.974	800.059
AT1G20780	TCV = Mock > NES	4.0696e-10	-0.219816	0.750502	1327.81	1432.28	1405.41	1420.39	1399.78	2030.91	767.038	828.927	879.982
AT1G20790	TCV > Mock = NES	0.254241	7.25546	7.25546	0.982109	3.57176	0	0	0	0	0	0	0
AT1G20795	TCV = Mock < NES	1.25613e-07	1.68288	-3.13843	1.96422	0	1.89792	0	1.18225	0	9.64276	12.1122	12.4879
AT1G20810	TCV < Mock < NES	1.11022e-16	-2.44357	-0.405786	412.486	301.814	381.482	1950.2	2117.4	1893.42	434.801	421.655	595.257
AT1G20816	TCV < Mock < NES	1.11022e-16	-2.13094	-1.37643	210.171	199.126	220.159	828.184	1084.12	844.833	559.28	557.16	517.832
AT1G20823	NES < TCV < Mock	2.67977e-10	-0.489351	0.845921	2415.99	1586.75	2254.73	2687.63	2591.48	3505.23	1296.51	1015.15	1169.7
AT1G20830	TCV < Mock < NES	-2.22045e-16	-1.14947	-0.264558	498.911	489.331	434.624	991.552	1119.59	1045.27	614.507	542.777	551.966
AT1G20840	TCV = Mock = NES	0.592575	0.0141009	-0.213598	425.253	330.388	327.392	356.233	361.767	354.498	417.269	398.188	440.407
AT1G20850	TCV < Mock < NES	1.11022e-16	-2.17288	-0.431002	451.77	462.543	725.955	2350.68	2564.29	2481.49	703.045	736.572	771.753
AT1G20860	TCV = Mock = NES	0.991108	4.9432	0.0257477	0	0.89294	0	0	0	0	0.876615	0	0
[truncated: 22,458 more rows]
